# Supplementary material for: Two different cell-cycle processes determine the timing of cell division in Escherichia coli
Source: eLife journal article supplement (doi:10.7554/elife.67495), 2021-10-06
Supplement: supp [file elife-67495-supp-v1.zip]

Archive with 20 entries (20 files):
- elife_poa_e67495_Figure_2_Video_1.avi
- elife_poa_e67495_Figure_2_source_data_1.xls
- elife_poa_e67495_Figure_3_source_data_1.xls
- elife_poa_e67495_Figure_4_source_data_1.xls
- elife_poa_e67495_Supplementary_file_1.csv
- elife_poa_e67495_Supplementary_file_2.csv
- elife_poa_e67495_Transparent_Reporting_File.docx
- elife_poa_e67495_Figure_2_figure_supplement_1.pdf
- elife_poa_e67495_Figure_2_figure_supplement_2.pdf
- elife_poa_e67495_Figure_2_figure_supplement_3.pdf
- elife_poa_e67495_Figure_2_figure_supplement_4.pdf
- elife_poa_e67495_Figure_2_figure_supplement_5.pdf
- elife_poa_e67495_Figure_3_figure_supplement_1.pdf
- elife_poa_e67495_Figure_3_figure_supplement_2.pdf
- elife_poa_e67495_Figure_3_figure_supplement_3.pdf
- elife_poa_e67495_Figure_4_figure_supplement_1.pdf
- elife_poa_e67495_Figure_4_figure_supplement_2.pdf
- elife_poa_e67495_Figure_4_figure_supplement_3.pdf
- elife_poa_e67495_Figure_4_figure_supplement_4.pdf
- elife_poa_e67495_Figure_4_figure_supplement_5.pdf
