# Supplementary material for: Two different cell-cycle processes determine the timing of cell division in Escherichia coli
Source: eLife journal article supplement (doi:10.7554/elife.67495), 2021-10-06
Supplement: supp [file elife-67495-supp-v1.zip › elife_poa_e67495_Figure_2_source_data_1.xls]

## Sheet: Fig2B
condition	A22 concentration	Length (um)	Width (um)
Liquid_culture	0	2.56462	0.585204
Liquid_culture	0.25	2.28296	0.695073
Liquid_culture	0.5	2.04105	0.786587
Liquid_culture	1	2.11016	1.03019
Mother_Machine	0	2.19422	0.526698
Mother_Machine	0	2.30164	0.529345
Mother_Machine	0	2.56213	0.537481
Mother_Machine	0.25	2.01866	0.755838
Mother_Machine	0.25	2.03079	0.621258
Mother_Machine	0.25	2.07064	0.714076
Mother_Machine	0.25	2.02224	0.654985
Mother_Machine	0.5	1.62888	0.767339
Mother_Machine	0.5	1.7024	0.867461
Mother_Machine	0.5	2.0457	0.849579
Mother_Machine	0.5	1.96772	0.756497
Mother_Machine	1	1.70878	0.951024
Mother_Machine	1	1.80104	0.908735
Mother_Machine	1	1.97848	0.811706

## Sheet: Fig2C
condition	A22 concentration	Interdivision time (min)	Inter-initiation time (min)	C period (min)	D period (min)
Mother Machine	0	111.227	118.668	51.2353	26.1652
Mother Machine	0	82.7698	89.4739	49.1331	19.3192
Mother Machine	0	74.9565	82.6087	51.7391	19.0609
Mother Machine	0.25	78.1419	87.1241	51.6971	34.9277
Mother Machine	0.25	71.1401	78.917	52.7166	20.6622
Mother Machine	0.25	73.9636	82.5283	53.7189	28.3878
Mother Machine	0.25	114.198	119.315	55.0355	35.9695
Mother Machine	0.5	95.2216	103.589	53.8054	38.2703
Mother Machine	0.5	85.7166	100.038	49.9292	70.1199
Mother Machine	0.5	70.3162	76.1976	52.4348	41.4783
Mother Machine	0.5	81.2353	90.6784	54.6029	37.7647
Mother Machine	1	88.1154	92.4423	50.5962	88.6346
Mother Machine	1	78.0305	82.0763	50.9313	74.0305
Mother Machine	1	76.4615	89.3462	62.1154	44.2308

## Sheet: Fig2D_WT
0	90	84	78	72	66	60	54	48	42	36	30	24	18	12	6	0
-1.5	0	0	0	0	0	0	0	0	0	4.06901e-05	0.000129949	0.000448207	0.00181324	0.00704607	0.0194706	0.0258031
-1.4	0	0	0	0	0	0	0	8.2335e-05	4.03714e-05	0.000203451	0.000389847	0.00199203	0.00511592	0.0166215	0.0290965	0.0344041
-1.3	0	0	0	0	0	0	0	0.000123503	8.07428e-05	0.000651042	0.00246903	0.00557769	0.0119156	0.0235772	0.0360971	0.0321244
-1.2	0	0	0	0	0	0.000102229	8.75388e-05	0.000370508	0.00104966	0.00272624	0.0061076	0.0115538	0.0172257	0.0260163	0.0302997	0.0331606
-1.1	0	0	0	0	0.000138504	0.000306686	0.000569002	0.0013997	0.00298748	0.0082194	0.0123018	0.0157371	0.0191685	0.0195122	0.0286589	0.0431088
-1	0	0.000317763	0.000182149	0.000214293	0.00117729	0.00173789	0.00240732	0.00345807	0.00867985	0.0137533	0.0186693	0.0188247	0.0185209	0.0187895	0.0298622	0.0405181
-0.9	0.00495868	0.00730855	0.00400729	0.00428587	0.00408587	0.00378246	0.00612772	0.00860401	0.014453	0.021403	0.0232609	0.0198705	0.0184562	0.0212285	0.0313936	0.0406218
-0.8	0.0225895	0.0251033	0.0125683	0.0120004	0.00747922	0.00638929	0.0103734	0.0162612	0.0264433	0.0329997	0.0291086	0.0234064	0.0211113	0.0214995	0.02669	0.0346114
-0.7	0.046281	0.0387671	0.0275046	0.0190721	0.0129501	0.0128808	0.0192585	0.0312873	0.0430763	0.0427246	0.0354327	0.0245518	0.0214998	0.0233062	0.0286589	0.0279793
-0.6	0.0738292	0.0505243	0.0340619	0.024108	0.0204986	0.0243304	0.0379481	0.0528179	0.0597901	0.0528971	0.039028	0.0295319	0.0242197	0.0275519	0.0288777	0.0296373
-0.5	0.0573003	0.0479822	0.0408015	0.0300011	0.033795	0.0461051	0.0612772	0.0713021	0.0706096	0.0585531	0.0454388	0.038247	0.0326383	0.0307136	0.0393787	0.0392746
-0.4	0.0589532	0.0524309	0.0519126	0.0541091	0.05741	0.0737068	0.0845625	0.0862048	0.0712556	0.0590007	0.0518063	0.0447709	0.0420282	0.0406504	0.0444104	0.0437306
-0.3	0.062259	0.0645059	0.0766849	0.0835744	0.0945983	0.103455	0.0980873	0.0838582	0.0693985	0.0652262	0.0654076	0.0682271	0.0662479	0.0650407	0.0521768	0.0379275
-0.2	0.0809917	0.11503	0.124772	0.127505	0.133934	0.115058	0.105309	0.082829	0.07065	0.0767822	0.0863294	0.1	0.0987566	0.0856369	0.047145	0.0247668
-0.1	0.113499	0.141405	0.158288	0.170578	0.16018	0.131926	0.0987438	0.0816763	0.0789261	0.087443	0.103613	0.120468	0.130812	0.104426	0.047145	0.0128497
0	0.110744	0.122339	0.155009	0.16747	0.152701	0.133919	0.101414	0.0810588	0.0756157	0.0828044	0.101403	0.116683	0.118378	0.0966576	0.0514111	0.0136788
0.1	0.0865014	0.0810296	0.106375	0.11904	0.119806	0.11102	0.0943231	0.0788358	0.0725474	0.0719808	0.0834705	0.0858068	0.0916332	0.0786811	0.0546926	0.0263212
0.2	0.0628099	0.0568796	0.0593807	0.0700739	0.0819945	0.0939481	0.0912155	0.0803178	0.0693985	0.0615234	0.0596465	0.06001	0.059254	0.0538392	0.0488952	0.0379275
0.3	0.0473829	0.0476644	0.0479053	0.0451088	0.0520083	0.064864	0.0785223	0.0786299	0.0690755	0.0574951	0.0475613	0.0415837	0.0358762	0.0336947	0.0426602	0.0412435
0.4	0.0567493	0.0540197	0.0358834	0.0294653	0.0278393	0.0381313	0.0511227	0.0683792	0.0673395	0.0531006	0.0411938	0.0323207	0.0278461	0.0271906	0.0265806	0.0366839
0.5	0.0550964	0.0413092	0.0275046	0.0187507	0.0188366	0.0203435	0.0302009	0.0429377	0.0517562	0.0501302	0.0368189	0.0278884	0.0216293	0.0235772	0.0242835	0.0268394
0.6	0.0413223	0.0346362	0.0220401	0.0132862	0.0117729	0.00945614	0.015188	0.0246593	0.0333872	0.037557	0.0318375	0.0247012	0.0196866	0.0195122	0.0285496	0.0268394
0.7	0.0170799	0.0149349	0.0120219	0.00792885	0.00547091	0.00511143	0.00761588	0.0128854	0.0219217	0.0261637	0.0264229	0.0216135	0.0176791	0.0188799	0.0293152	0.0333679
0.8	0.00110193	0.00381316	0.00236794	0.00257152	0.00242382	0.00265794	0.00363286	0.00773949	0.0120711	0.0166829	0.0200121	0.0207669	0.0160601	0.0181572	0.0284402	0.0426943
0.9	0.000550964	0	0.000546448	0.000857173	0.000761773	0.000766714	0.00135685	0.00308756	0.00581348	0.0115153	0.0153773	0.0167829	0.0170315	0.0163505	0.0219864	0.0427979
1	0	0	0	0	0.000138504	0	0.000525233	0.00102919	0.00290674	0.00594076	0.00996275	0.0134462	0.0161896	0.0211382	0.0222052	0.0308808
1.1	0	0	0	0	0	0	0.000131308	0.000123503	0.000645943	0.00199382	0.00437495	0.00886454	0.0149592	0.0230352	0.0270182	0.0298446
1.2	0	0	0.000182149	0	0	0	0	4.11675e-05	8.07428e-05	0.000366211	0.00181928	0.00453187	0.00913094	0.0189702	0.0270182	0.0280829
1.3	0	0	0	0	0	0	0	0	0	8.13802e-05	0.000563112	0.00144422	0.00356171	0.0112014	0.01958	0.0274611
1.4	0	0	0	0	0	0	0	0	0	0	4.33163e-05	0.000249004	0.00103614	0.00424571	0.0140013	0.0186528
1.5	0	0	0	0	0	0	0	0	0	0	0	4.98008e-05	0.000129517	0.00135501	0.0044848	0.0092228

## Sheet: Fig2D_025
0	90	84	78	72	66	60	54	48	42	36	30	24	18	12	6	0
-1.5	0	0	0	0	0	0	0	0	0	0	0	0	0	0.000258065	0.000327675	0.000982849
-1.4	0	0	0	0	0	0	0	0	0	0	0	9.67212e-05	9.83478e-05	0.000860215	0.00222819	0.00638852
-1.3	0	0	0	0	0	0	0	0	0	0	0.000169334	0.00145082	0.00265539	0.00498925	0.0108788	0.0177896
-1.2	0	0	0	0	0	0	0	0	0.000176741	0.000280053	0.00169334	0.00425573	0.00914634	0.0190108	0.0266072	0.0397071
-1.1	0	0	0	0	0	0	0.000199223	0.000370429	0.00111936	0.00147028	0.00702735	0.0147016	0.0266522	0.036043	0.0503965	0.0651629
-1	0	0	8.34446e-05	0.000128164	0.000108284	0.00050274	0.000448252	0.00195798	0.00418287	0.00805153	0.0140547	0.0256311	0.0370771	0.0577204	0.0738581	0.0836896
-0.9	0.00018457	0.000357441	0.000333778	0.000512656	0.0012994	0.00211151	0.00298835	0.00481558	0.00836574	0.0137926	0.0224367	0.0344327	0.0451416	0.0611613	0.0767416	0.0860976
-0.8	0.00073828	0.00142976	0.00241989	0.00166613	0.00357336	0.0048263	0.00697281	0.00878446	0.0121951	0.0174333	0.0209974	0.0268885	0.0419945	0.055828	0.0669769	0.0687012
-0.7	0.00350683	0.00524246	0.00584112	0.00743351	0.00947482	0.0111608	0.0138958	0.0168281	0.0172617	0.015753	0.020066	0.0273721	0.034225	0.0433548	0.0483649	0.0449162
-0.6	0.019749	0.0172763	0.0158545	0.017943	0.0202491	0.0222714	0.025899	0.0270942	0.0233887	0.0222642	0.0199814	0.0278557	0.0325531	0.0378495	0.0322433	0.0309598
-0.5	0.03433	0.0376504	0.03997	0.0410125	0.0402815	0.0398673	0.0416874	0.0378896	0.0312831	0.0292656	0.0263314	0.0320147	0.0382573	0.0331183	0.0276558	0.020345
-0.4	0.0618309	0.0741094	0.0669226	0.0681192	0.0698971	0.0684732	0.0634027	0.0586336	0.0476022	0.042078	0.0414867	0.0420737	0.0451416	0.0387097	0.0259519	0.0167576
-0.3	0.101329	0.0992494	0.104055	0.102916	0.0992962	0.0931074	0.091792	0.0826057	0.0771179	0.0705734	0.0660401	0.0664474	0.0586153	0.040086	0.0251655	0.0107131
-0.2	0.134367	0.136781	0.133011	0.128292	0.126963	0.123825	0.119584	0.119172	0.122776	0.116712	0.106257	0.0941097	0.0662864	0.0407742	0.0170391	0.00658509
-0.1	0.150978	0.137972	0.139603	0.138033	0.137899	0.141169	0.14359	0.153728	0.156239	0.168942	0.156803	0.120128	0.0721873	0.0299355	0.0125827	0.00319426
0	0.14378	0.13964	0.136015	0.136943	0.137899	0.139008	0.138908	0.147166	0.161895	0.166632	0.154686	0.110359	0.0686467	0.035957	0.01409	0.00339083
0.1	0.128276	0.12987	0.128672	0.127139	0.123443	0.116535	0.116296	0.116103	0.11494	0.110901	0.10033	0.0910146	0.0620574	0.0393978	0.0198571	0.00599538
0.2	0.0998523	0.101394	0.0996328	0.0990067	0.0922577	0.0912473	0.0874091	0.0768376	0.0773536	0.068403	0.0650241	0.0614179	0.0521243	0.0414624	0.0281146	0.0121873
0.3	0.0721669	0.067318	0.0691756	0.0708106	0.0664321	0.0659092	0.0623568	0.0535006	0.0490751	0.0401876	0.0410634	0.042654	0.0425846	0.0387957	0.0262796	0.0190673
0.4	0.0310078	0.0331228	0.0355474	0.0355655	0.0388738	0.0410236	0.0390975	0.0393713	0.0289855	0.0278653	0.0308187	0.0274688	0.0332415	0.0331183	0.0311947	0.0229987
0.5	0.0127353	0.0139402	0.0139352	0.0157001	0.0195994	0.0206626	0.0208686	0.0242896	0.0217391	0.0238745	0.021336	0.026695	0.0355035	0.0376774	0.0338816	0.0322375
0.6	0.00387597	0.00333611	0.0069259	0.00672861	0.00871684	0.0108089	0.0136468	0.0155051	0.0173206	0.0170832	0.02032	0.0231164	0.0347168	0.0418065	0.0477751	0.0438842
0.7	0.00092285	0.00107232	0.001502	0.00185838	0.00238224	0.00462521	0.00642494	0.00883738	0.0134912	0.0140727	0.0230294	0.0285327	0.0394375	0.055828	0.0675011	0.0723377
0.8	0.00036914	0.000238294	0.000417223	0.000192246	0.00119112	0.0023126	0.00323737	0.00539768	0.00842465	0.0137226	0.0202354	0.0304672	0.0442565	0.0622796	0.0773314	0.0847708
0.9	0	0	8.34446e-05	0	0.000162426	0.000553014	0.00109573	0.00100545	0.00400613	0.0068613	0.0127847	0.022536	0.0388474	0.0544516	0.0703192	0.0798074
1	0	0	0	0	0	0	0.000149417	0.000105837	0.000824791	0.0031506	0.00465668	0.0126705	0.0250787	0.0346667	0.0479062	0.0611332
1.1	0	0	0	0	0	0	4.98058e-05	0	0.000235655	0.000490093	0.001778	0.00464262	0.0103265	0.0179785	0.027066	0.0367586
1.2	0	0	0	0	0	0	0	0	0	0	0.000169334	0.000773769	0.00245869	0.00593548	0.00851956	0.0161679
1.3	0	0	0	0	0	0	0	0	0	7.00133e-05	0.000254001	0.000193442	0.000491739	0.000774194	0.00235926	0.00535653
1.4	0	0	0	0	0	0	0	0	0	0	0	0	0.000196696	8.60215e-05	0.000458746	0.00113028
1.5	0	0	0	0	0	0	0	0	0	0	8.46668e-05	0	0	0	0.00013107	0.000343997

## Sheet: Fig2D_050
0	90	84	78	72	66	60	54	48	42	36	30	24	18	12	6	0
-1	0	0	0	0	9.9985e-05	0	0.000114318	0.000542888	0.000942063	0.002752	0.0050197	0.00749781	0.0112744	0.0166236	0.024226	0.0305086
-0.9	0	0.000106247	9.92704e-05	9.65857e-05	0.000299955	0.000918671	0.002515	0.00542888	0.00806642	0.0167278	0.0230813	0.0346574	0.0423126	0.0507716	0.0571981	0.0658281
-0.8	0.000426543	0.000531237	0.00129051	0.00236635	0.00384942	0.0058903	0.00988854	0.0204488	0.0332666	0.0464062	0.0620191	0.071947	0.0785182	0.0858787	0.0914603	0.0935205
-0.7	0.00274206	0.00366553	0.00506279	0.00671271	0.0112483	0.0158876	0.0289225	0.0382435	0.0566415	0.0752752	0.0877744	0.0939619	0.101033	0.0997995	0.099484	0.0969468
-0.6	0.0104808	0.0132809	0.015238	0.018303	0.0213468	0.0289651	0.0342384	0.0459042	0.0588201	0.0679905	0.0769375	0.0857462	0.0873096	0.0892499	0.0855005	0.0781958
-0.5	0.0293096	0.0284212	0.029384	0.0307625	0.0322452	0.0332883	0.038068	0.0410182	0.0524023	0.0548241	0.0601426	0.0604212	0.0607342	0.0601877	0.0557792	0.0494239
-0.4	0.0583755	0.0571611	0.05306	0.0533153	0.0517422	0.0512834	0.0493855	0.0481361	0.0469265	0.0501835	0.0461625	0.0433118	0.0409368	0.0384783	0.0338493	0.0292178
-0.3	0.096155	0.0988632	0.095647	0.0883276	0.0846873	0.082248	0.0747071	0.0683436	0.0630593	0.0566048	0.0473822	0.038167	0.0317428	0.0249353	0.02113	0.0179062
-0.2	0.152276	0.144815	0.144885	0.13749	0.13238	0.132451	0.122149	0.103812	0.0831371	0.0638355	0.0502909	0.0350164	0.0264412	0.0185126	0.0133643	0.0113351
-0.1	0.19298	0.193476	0.187323	0.191095	0.182623	0.174169	0.155644	0.138678	0.106394	0.0702029	0.0462094	0.0313073	0.0207369	0.013543	0.0100361	0.00722818
0	0.179757	0.178814	0.17958	0.180519	0.177323	0.166766	0.153358	0.134697	0.100919	0.0759767	0.0459749	0.0295126	0.0194282	0.0151414	0.00895253	0.00685269
0.1	0.128207	0.129781	0.128406	0.122422	0.121932	0.113159	0.109117	0.0991073	0.0841969	0.0602202	0.0482267	0.0357741	0.0270452	0.0179023	0.0149639	0.0108188
0.2	0.0801901	0.0796324	0.0797637	0.0774617	0.0764385	0.0728992	0.0704773	0.0643021	0.0588201	0.0541766	0.0467255	0.0389647	0.0315751	0.0264756	0.0214654	0.0203469
0.3	0.0414966	0.041649	0.0441257	0.0445743	0.0425436	0.0440422	0.0457845	0.0459645	0.049635	0.0477552	0.0467255	0.0433517	0.0426481	0.040658	0.0369453	0.0309779
0.4	0.0187679	0.0198151	0.0204497	0.0252089	0.0290956	0.0326939	0.0344098	0.0432501	0.0471032	0.0545003	0.0579377	0.0627742	0.0611704	0.0600424	0.0606037	0.0538593
0.5	0.0073731	0.00743731	0.0112672	0.0136186	0.0210968	0.0252905	0.0360103	0.0445772	0.0567004	0.07139	0.0794708	0.0861849	0.0887524	0.0898893	0.0864293	0.0829363
0.6	0.0014015	0.00223119	0.00362337	0.00647124	0.00809879	0.0145907	0.0237782	0.0374593	0.0545219	0.0717138	0.086414	0.0937625	0.0989866	0.099567	0.101316	0.0988712
0.7	6.09347e-05	0.000318742	0.000744528	0.00111074	0.00249963	0.00464739	0.0096599	0.0162866	0.0294395	0.0432225	0.0581723	0.0688362	0.0773774	0.083699	0.0873323	0.0946
0.8	0	0	4.96352e-05	9.65857e-05	0.00039994	0.000756552	0.00177193	0.00313669	0.00812529	0.0136521	0.0205949	0.030071	0.0370445	0.0469354	0.05387	0.0609936
0.9	0	0	0	4.82928e-05	4.99925e-05	0	0	0.000603209	0.000824305	0.00210447	0.00347157	0.00681981	0.0107711	0.0135139	0.0212332	0.0293117
1	0	0	0	0	0	0	0	0	0	5.39607e-05	0.000281479	0.000837521	0.00194618	0.00287715	0.00603715	0.00962193

## Sheet: Fig2D_1
0	90	84	78	72	66	60	54	48	42	36	30	24	18	12	6	0
-1	0	0	0.000147016	0.000288934	0.000142857	0.000401338	0.000118161	0.000389332	0.000399648	0.000867534	0.00138297	0.00251488	0.00523363	0.00736431	0.0114333	0.0172119
-0.9	0	0.000154799	0.000441047	0.000722335	0.000857143	0.000668896	0.00106345	0.00194666	0.00343698	0.00487154	0.00875879	0.0122665	0.0184356	0.0229112	0.0314186	0.0381799
-0.8	0.00120669	0.00185759	0.00132314	0.00303381	0.00342857	0.00655518	0.00968924	0.0155733	0.0208616	0.0276276	0.0346894	0.0437282	0.0438022	0.0531412	0.054834	0.0650437
-0.7	0.00310291	0.00386997	0.0085269	0.00881248	0.0127143	0.0238127	0.0332034	0.0533385	0.0614659	0.0655989	0.0753717	0.0818107	0.0822292	0.0814165	0.0828226	0.0845378
-0.6	0.0131012	0.0133127	0.0152896	0.0232592	0.0335714	0.0494983	0.0642798	0.0779638	0.094317	0.104771	0.10257	0.0963355	0.0965628	0.0937813	0.0896369	0.0833492
-0.5	0.0248233	0.0334365	0.0357248	0.0372725	0.051	0.055786	0.0771594	0.0900331	0.0974343	0.0990324	0.100092	0.0907411	0.0930737	0.0889626	0.0806732	0.0730316
-0.4	0.0546458	0.0616099	0.056895	0.0665992	0.0547143	0.0663545	0.0674702	0.0761145	0.0748142	0.0734067	0.0703008	0.0705194	0.0670942	0.0611874	0.0592701	0.0514454
-0.3	0.101189	0.0924149	0.0961482	0.0853799	0.0861429	0.0806689	0.0736146	0.0624878	0.0529134	0.0531865	0.0480005	0.0461404	0.0435664	0.0416401	0.0365865	0.036706
-0.2	0.154973	0.139319	0.133196	0.132476	0.123143	0.095786	0.0888574	0.0618065	0.0510751	0.035302	0.0311744	0.0286389	0.0284313	0.026366	0.0248788	0.0235356
-0.1	0.191346	0.18839	0.186857	0.171338	0.152571	0.121204	0.0987829	0.0642398	0.0458796	0.0335002	0.0242595	0.0234551	0.021406	0.0217292	0.0233696	0.0164036
0	0.176349	0.179102	0.163481	0.169315	0.148143	0.130301	0.0951199	0.0667705	0.0455599	0.0333	0.0266221	0.0231472	0.0216418	0.0228203	0.0236897	0.0174496
0.1	0.129116	0.127399	0.127757	0.113407	0.111	0.0983278	0.0770412	0.0636558	0.0437215	0.0385719	0.0338827	0.029614	0.0306474	0.0300482	0.0257477	0.0232503
0.2	0.0829167	0.0787926	0.0793884	0.0845131	0.0794286	0.0798662	0.0659341	0.0583025	0.060187	0.0578579	0.0477123	0.0476801	0.0459239	0.0452768	0.0415257	0.0346139
0.3	0.0360283	0.0442724	0.0443987	0.0460849	0.0587143	0.0608696	0.0721966	0.0759198	0.080649	0.0768769	0.0802697	0.0739581	0.0729407	0.0680971	0.0602305	0.0531095
0.4	0.0196518	0.0226006	0.0319024	0.0297602	0.043	0.0604682	0.0769231	0.0929531	0.100392	0.102903	0.104472	0.101211	0.0910934	0.0854169	0.0828226	0.0743629
0.5	0.00775728	0.00928793	0.0133784	0.0190696	0.0272857	0.0461538	0.0617984	0.0809811	0.09088	0.100367	0.100092	0.102443	0.0989674	0.0954632	0.0895911	0.087771
0.6	0.00224099	0.00309598	0.00352837	0.00534528	0.0124286	0.0180602	0.0287132	0.0444812	0.0554712	0.0641308	0.0723176	0.0777048	0.07775	0.077507	0.0826397	0.0827786
0.7	0.00120669	0.000773994	0.00102911	0.00245594	0.001	0.00374582	0.00708968	0.010804	0.0167053	0.0226894	0.030771	0.0362862	0.0424348	0.0487772	0.0529132	0.0629041
0.8	0.000344768	0.000309598	0.000147016	0.000433401	0.000571429	0.00107023	0.000472646	0.00184933	0.00303733	0.0042042	0.00593523	0.00944365	0.0154651	0.0185471	0.0267081	0.0367535
0.9	0	0	0.000441047	0.000433401	0	0.000267559	0.000236323	0.000194666	0.000479578	0.000667334	0.00080673	0.00138575	0.00231034	0.00563688	0.0105643	0.0176873
1	0	0	0	0	0	0.000133779	0	9.73331e-05	0	6.67334e-05	0.000172871	0.000256621	0.000377198	0.00127284	0.00333852	0.0063237

## Sheet: Fig2_Sup2
Condition	A22 concentration	Average Cell Width (um)	CV Width
Mother Machine	0	0.526698	0.126116
Mother Machine	0	0.529345	0.10472
Mother Machine	0	0.537481	0.103368
Mother Machine	0.25	0.755838	0.104952
Mother Machine	0.25	0.621258	0.111226
Mother Machine	0.25	0.714076	0.10159
Mother Machine	0.25	0.654985	0.120842
Mother Machine	0.5	0.767339	0.0851532
Mother Machine	0.5	0.867461	0.0979712
Mother Machine	0.5	0.849579	0.0876185
Mother Machine	0.5	0.756497	0.128968
Mother Machine	1	0.951024	0.0751778
Mother Machine	1	0.908735	0.0699426
Mother Machine	1	0.811706	0.112712
Liquid_culture	0	0.585204	0.0685835
Liquid_culture	0.25	0.695073	0.0661782
Liquid_culture	0.5	0.786587	0.0709994
Liquid_culture	1	1.03019	0.0583616

## Sheet: Fig2_Sup3_A
condition	A22 concentration	Growth rate (min-1)
Liquid culture	0	0.0098
Liquid culture	0	0.0066
Liquid culture	0	0.0068
Liquid culture	0	0.0106
Liquid culture	0.25	0.0072
Liquid culture	0.25	0.0073
Liquid culture	0.25	0.01
Liquid culture	0.5	0.0074
Liquid culture	0.5	0.0078
Liquid culture	0.5	0.0103
Liquid culture	1	0.0081
Liquid culture	1	0.0084
Mother Machine	0	0.00663161
Mother Machine	0	0.00872219
Mother Machine	0	0.00925647
Mother Machine	0.25	0.00911271
Mother Machine	0.25	0.0104986
Mother Machine	0.25	0.00966147
Mother Machine	0.25	0.00653626
Mother Machine	0.5	0.00786646
Mother Machine	0.5	0.00855014
Mother Machine	0.5	0.0104884
Mother Machine	0.5	0.00882806
Mother Machine	1	0.00842237
Mother Machine	1	0.00895918
Mother Machine	1	0.00942229

## Sheet: Fig2_Sup3_B
A22 concentration	Time (min)	OD_{600}
untreated	365	0.56
untreated	390	0.71
untreated	450	1.11
untreated	520	2.07
0.25 ug/mL	365	0.67
0.25 ug/mL	390	0.82
0.25 ug/mL	450	1.33
0.25 ug/mL	520	2.52
0.5 ug/mL	365	0.69
0.5 ug/mL	390	0.85
0.5 ug/mL	450	1.43
0.5 ug/mL	520	2.67
1 ug/mL	365	0.8
1 ug/mL	390	0.98
1 ug/mL	450	1.7
1 ug/mL	520	3.21

## Sheet: Fig2_Sup4
condition	A22 concentration	Growth rate (min-1)	CV Growth rate (%)	Average Cell Width (um)	CV Interdivision Time	CV I Period	CV C Period	CV D Period
Mother Machine	0	0.00663161	0.110906	0.526698	0.152974	0.15362	0.168183	0.438366
Mother Machine	0	0.00872219	0.113903	0.529345	0.164061	0.173016	0.174606	0.5125
Mother Machine	0	0.00925647	0.106281	0.537481	0.159116	0.185776	0.199179	0.607777
Mother Machine	0.25	0.00911271	0.123889	0.755838	0.154791	0.172114	0.198292	0.393252
Mother Machine	0.25	0.0104986	0.108724	0.621258	0.155896	0.190763	0.171478	0.486265
Mother Machine	0.25	0.00966147	0.117789	0.714076	0.157368	0.188909	0.179987	0.460709
Mother Machine	0.25	0.00653626	0.12725	0.654985	0.159164	0.164352	0.157118	0.376112
Mother Machine	0.5	0.00786646	0.107348	0.767339	0.148566	0.189138	0.17474	0.386373
Mother Machine	0.5	0.00855014	0.121308	0.867461	0.184726	0.235249	0.206434	0.323304
Mother Machine	0.5	0.0104884	0.120032	0.849579	0.151985	0.181612	0.164965	0.326718
Mother Machine	0.5	0.00882806	0.116427	0.756497	0.154867	0.171786	0.190783	0.463822
Mother Machine	1	0.00842237	0.114225	0.951024	0.161304	0.216656	0.282792	0.266243
Mother Machine	1	0.00895918	0.106289	0.908735	0.142589	0.192266	0.264106	0.235866
Mother Machine	1	0.00942229	0.123182	0.811706	0.151499	0.185065	0.168491	0.385909

[truncated: 1 more sheets: Fig2_Sup5]
