# Supplementary material for: Two different cell-cycle processes determine the timing of cell division in Escherichia coli
Source: eLife journal article supplement (doi:10.7554/elife.67495), 2021-10-06
Supplement: supp [file elife-67495-supp-v1.zip › elife_poa_e67495_Figure_3_source_data_1.xls]

## Sheet: Fig3A
condition	A22 concentration	Birth length (norm.)	Added length during cell cycle (norm.)		A22 concentration	Birth length (norm.)	Added length during cell cycle (norm.)
Mother Machine	untreated	0.929955	1.75134		1 ug/mL	1.18057	0.58601
Mother Machine	untreated	0.930955	1.42551		1 ug/mL	1.189	0.908746
Mother Machine	untreated	0.931955	1.56585		1 ug/mL	1.25096	1.15038
Mother Machine	untreated	0.932955	1.4684		1 ug/mL	0.984216	1.82366
Mother Machine	untreated	0.933955	1.59991		1 ug/mL	1.18525	0.712612
Mother Machine	untreated	0.934955	1.43196		1 ug/mL	1.17875	1.10082
Mother Machine	untreated	0.935955	1.62712		1 ug/mL	0.985565	1.10635
Mother Machine	untreated	0.936955	1.43554		1 ug/mL	1.11401	0.982258
Mother Machine	untreated	0.937955	1.75218		1 ug/mL	1.31037	1.16697
Mother Machine	untreated	0.938955	1.9839		1 ug/mL	1.24721	1.29938
Mother Machine	untreated	0.939955	1.36816		1 ug/mL	1.11951	1.15094
Mother Machine	untreated	0.940955	1.74454		1 ug/mL	1.12011	1.23537
Mother Machine	untreated	0.941955	1.67606		1 ug/mL	1.37321	1.04179
Mother Machine	untreated	0.942955	1.54043		1 ug/mL	1.05515	1.56433
Mother Machine	untreated	0.943955	1.91649		1 ug/mL	1.11713	0.972201
Mother Machine	untreated	0.944955	1.87788		1 ug/mL	1.18076	1.36383
Mother Machine	untreated	0.945955	1.48543		1 ug/mL	1.11733	1.10711
Mother Machine	untreated	0.946955	1.486		1 ug/mL	1.18223	1.5569
Mother Machine	untreated	0.947955	1.7535		1 ug/mL	1.11719	1.10973
Mother Machine	untreated	0.948955	1.42425		1 ug/mL	1.31058	1.16967
Mother Machine	untreated	0.949955	1.31097		1 ug/mL	1.19019	1.2336
Mother Machine	untreated	0.950955	1.48237		1 ug/mL	1.18322	1.23348
Mother Machine	untreated	0.951955	1.50154		1 ug/mL	1.24782	1.36401
Mother Machine	untreated	0.952955	2.05628		1 ug/mL	1.3099	1.10904
Mother Machine	untreated	0.953955	1.61975		1 ug/mL	1.24648	1.10231
Mother Machine	untreated	0.954955	1.22138		1 ug/mL	1.18509	1.49313
Mother Machine	untreated	0.955955	1.57352		1 ug/mL	1.24892	1.20871
Mother Machine	untreated	0.956955	1.977		1 ug/mL	1.18522	1.29254
Mother Machine	untreated	0.957955	2.13203		1 ug/mL	1.18704	1.35364
Mother Machine	untreated	0.958955	1.80635		1 ug/mL	1.17693	1.11429
Mother Machine	untreated	0.959955	1.61645		1 ug/mL	1.11768	1.148
Mother Machine	untreated	0.960955	1.48024		1 ug/mL	1.32072	0.961303
Mother Machine	untreated	0.961955	1.2858		1 ug/mL	1.1194	1.29661
Mother Machine	untreated	0.962955	1.29662		1 ug/mL	1.25372	0.901318
Mother Machine	untreated	0.963955	1.88916		1 ug/mL	1.31972	1.54284
Mother Machine	untreated	0.964955	1.5398		1 ug/mL	1.38161	1.04126
Mother Machine	untreated	0.965955	1.57048		1 ug/mL	1.44118	1.03811
Mother Machine	untreated	0.966955	1.67835		1 ug/mL	0.983974	1.30151
Mother Machine	untreated	0.967955	1.73035		1 ug/mL	1.24572	1.15729
Mother Machine	untreated	0.968955	1.23908		1 ug/mL	1.11461	1.23305
Mother Machine	untreated	0.969955	1.41507		1 ug/mL	0.986696	1.6783
Mother Machine	untreated	0.970955	1.80363		1 ug/mL	1.3179	0.972378
Mother Machine	untreated	0.971955	1.49755		1 ug/mL	1.05019	1.03016
Mother Machine	untreated	0.972955	1.30258		1 ug/mL	1.05302	1.22831
Mother Machine	untreated	0.973955	2.31459		1 ug/mL	1.11578	1.24173
Mother Machine	untreated	0.974955	1.68491		1 ug/mL	0.990284	1.3598
Mother Machine	untreated	0.975955	2.02437		1 ug/mL	1.05713	1.29214
Mother Machine	untreated	0.976955	1.27546		1 ug/mL	0.984272	1.36067
Mother Machine	untreated	0.977955	1.04302		1 ug/mL	1.24374	1.17515
Mother Machine	untreated	0.978955	1.73484		1 ug/mL	1.11541	1.02458
Mother Machine	untreated	0.979955	1.85172		1 ug/mL	1.18725	0.974024
Mother Machine	untreated	0.980955	1.37404		1 ug/mL	0.990495	1.42638
Mother Machine	untreated	0.981955	1.61554		1 ug/mL	1.11871	1.22839
Mother Machine	untreated	0.982955	1.8121		1 ug/mL	1.18357	0.903768
Mother Machine	untreated	0.983955	1.7495		1 ug/mL	0.987493	1.23022
Mother Machine	untreated	0.984955	1.55559		1 ug/mL	1.11807	1.47726
Mother Machine	untreated	0.985955	1.87768		1 ug/mL	0.986123	1.17219
Mother Machine	untreated	0.986955	1.81558		1 ug/mL	0.985531	1.2386
Mother Machine	untreated	0.987955	1.85854		1 ug/mL	1.18298	0.891943
Mother Machine	untreated	0.988955	1.50023		1 ug/mL	1.11753	1.09323
Mother Machine	untreated	0.989955	1.73763		1 ug/mL	1.11954	1.23291
Mother Machine	untreated	0.990955	1.73723		1 ug/mL	1.11979	1.03334
Mother Machine	untreated	0.991955	1.61188		1 ug/mL	1.04798	1.0457
Mother Machine	untreated	0.992955	1.41604		1 ug/mL	1.12673	1.09199
Mother Machine	untreated	0.993955	1.74836		1 ug/mL	1.2468	1.10501
Mother Machine	untreated	0.994955	1.62198		1 ug/mL	0.921594	1.61996
Mother Machine	untreated	0.995955	1.36579		1 ug/mL	1.18016	1.21775
Mother Machine	untreated	0.996955	1.60516		1 ug/mL	1.0559	1.41849
Mother Machine	untreated	0.997955	2.13377		1 ug/mL	1.05495	1.35385
Mother Machine	untreated	0.998955	1.79269		1 ug/mL	1.18777	1.29591
Mother Machine	untreated	0.999955	1.28398		1 ug/mL	1.1808	1.23621
Mother Machine	untreated	1.00096	1.54519		1 ug/mL	1.25125	0.638685
Mother Machine	untreated	1.00196	1.41955		1 ug/mL	1.24676	1.28299
Mother Machine	untreated	1.00296	1.69064		1 ug/mL	1.11977	0.970598
Mother Machine	untreated	1.00396	1.30075		1 ug/mL	1.04981	1.52444
Mother Machine	untreated	1.00496	1.29		1 ug/mL	0.989256	1.47851
Mother Machine	untreated	1.00596	1.34486		1 ug/mL	0.923062	1.10166
Mother Machine	untreated	1.00696	1.60984		1 ug/mL	1.11809	1.03591
Mother Machine	untreated	1.00796	1.68389		1 ug/mL	0.989524	0.971941
Mother Machine	untreated	1.00896	1.29551		1 ug/mL	1.11601	1.39913
Mother Machine	untreated	1.00996	1.74372		1 ug/mL	1.24963	1.36418
Mother Machine	untreated	1.01096	1.42907		1 ug/mL	1.11756	1.1616
Mother Machine	untreated	1.01196	1.61496		1 ug/mL	1.25056	1.10126
Mother Machine	untreated	1.01296	1.61052		1 ug/mL	1.11756	1.1616
Mother Machine	untreated	1.01396	1.30213		1 ug/mL	1.25056	1.10126
Mother Machine	untreated	1.01496	1.62178		1 ug/mL	0.999694	0.831464
Mother Machine	untreated	1.01596	1.68355		1 ug/mL	1.17951	1.23655
Mother Machine	untreated	1.01696	1.54124		1 ug/mL	1.25084	1.10234
Mother Machine	untreated	1.01796	1.68258		1 ug/mL	1.12681	1.14983
Mother Machine	untreated	1.01896	1.56884		1 ug/mL	1.11312	1.43131
Mother Machine	untreated	1.01996	1.42349		1 ug/mL	1.12144	1.23512
Mother Machine	untreated	1.02096	1.68496		1 ug/mL	1.37425	0.847587
Mother Machine	untreated	1.02196	1.62178		1 ug/mL	1.3741	1.2299
Mother Machine	untreated	1.02296	1.68355		1 ug/mL	0.986012	1.69371
Mother Machine	untreated	1.02396	1.54124		1 ug/mL	1.11663	1.4319
Mother Machine	untreated	1.02496	1.68258		1 ug/mL	1.04996	1.10854
Mother Machine	untreated	1.02596	1.56884		1 ug/mL	1.12108	1.23323
Mother Machine	untreated	1.02696	1.42349		1 ug/mL	1.11627	1.42881
Mother Machine	untreated	1.02796	1.68496		1 ug/mL	1.11534	0.974181
Mother Machine	untreated	1.02896	1.24104		1 ug/mL	1.05048	1.2938
Mother Machine	untreated	1.02996	1.73846		1 ug/mL	1.31334	1.18083
Mother Machine	untreated	1.03096	1.68121		1 ug/mL	0.98832	1.2363
Mother Machine	untreated	1.03196	1.48391		1 ug/mL	1.1133	1.30636
Mother Machine	untreated	1.03296	1.35716		1 ug/mL	1.05147	1.10721
Mother Machine	untreated	1.03396	1.54222		1 ug/mL	1.24851	1.36971
Mother Machine	untreated	1.03496	1.36596		1 ug/mL	1.05935	1.16032
Mother Machine	untreated	1.03596	1.57658		1 ug/mL	1.05491	1.10078
Mother Machine	untreated	1.03696	1.81557		1 ug/mL	1.0522	0.911006
Mother Machine	untreated	1.03796	1.36656		1 ug/mL	0.987902	1.23352
Mother Machine	untreated	1.03896	1.81473		1 ug/mL	0.990714	1.2275
Mother Machine	untreated	1.03996	1.69427		1 ug/mL	1.24839	1.1036
Mother Machine	untreated	1.04096	1.80066		1 ug/mL	0.989334	1.35197
Mother Machine	untreated	1.04196	1.34914		1 ug/mL	1.1833	1.67035
Mother Machine	untreated	1.04296	1.48437		1 ug/mL	1.1189	0.908477
Mother Machine	untreated	1.04396	1.81732		1 ug/mL	0.988394	1.29725
Mother Machine	untreated	1.04496	1.60289		1 ug/mL	0.988292	1.16453
Mother Machine	untreated	1.04596	1.94468		1 ug/mL	1.1166	1.4221
Mother Machine	untreated	1.04696	1.68412		1 ug/mL	1.31559	0.838627
Mother Machine	untreated	1.04796	1.88234		1 ug/mL	1.05456	1.28088
Mother Machine	untreated	1.04896	1.35571		1 ug/mL	1.44579	1.04105
Mother Machine	untreated	1.04996	1.29705		1 ug/mL	1.44256	1.2172
Mother Machine	untreated	1.05096	2.06703		1 ug/mL	1.309	1.22936
Mother Machine	untreated	1.05196	1.74346		1 ug/mL	1.18395	0.972352
Mother Machine	untreated	1.05296	1.75641		1 ug/mL	1.1884	1.16452
Mother Machine	untreated	1.05396	1.30156		1 ug/mL	1.05051	1.17414
Mother Machine	untreated	1.05496	1.60484		1 ug/mL	1.11777	1.34073
Mother Machine	untreated	1.05596	1.62388		1 ug/mL	1.11375	1.301
Mother Machine	untreated	1.05696	1.43676		1 ug/mL	1.11946	1.0379
Mother Machine	untreated	1.05796	2.05565		1 ug/mL	1.11849	1.35297
Mother Machine	untreated	1.05896	1.6879		1 ug/mL	1.11705	1.2805
Mother Machine	untreated	1.05996	1.94693		1 ug/mL	1.18395	0.972352
Mother Machine	untreated	1.06096	1.30158		1 ug/mL	1.1884	1.16452
Mother Machine	untreated	1.06196	1.93843		1 ug/mL	1.05051	1.17414
Mother Machine	untreated	1.06296	1.63686		1 ug/mL	1.11777	1.34073
Mother Machine	untreated	1.06396	1.85868		1 ug/mL	1.11375	1.301
Mother Machine	untreated	1.06496	1.17268		1 ug/mL	1.11946	1.0379
Mother Machine	untreated	1.06596	1.53454		1 ug/mL	1.11849	1.35297
Mother Machine	untreated	1.06696	1.67178		1 ug/mL	1.11705	1.2805
Mother Machine	untreated	1.06796	1.42044		1 ug/mL	1.2437	0.905154
Mother Machine	untreated	1.06896	1.57094		1 ug/mL	1.11316	1.11456
Mother Machine	untreated	1.06996	1.41595		1 ug/mL	1.11781	1.10636
Mother Machine	untreated	1.07096	1.20933		1 ug/mL	1.11875	1.16771
Mother Machine	untreated	1.07196	1.74238		1 ug/mL	0.92169	1.17552
Mother Machine	untreated	1.07296	1.49697		1 ug/mL	1.17809	1.11078
Mother Machine	untreated	1.07396	1.41307		1 ug/mL	1.24814	1.0411
Mother Machine	untreated	1.07496	1.88442		1 ug/mL	1.17664	1.24092
Mother Machine	untreated	1.07596	1.82726		1 ug/mL	1.17793	1.10744
Mother Machine	untreated	1.07696	1.88085		1 ug/mL	1.05624	1.36156
Mother Machine	untreated	1.07796	1.48184		1 ug/mL	0.91843	1.04351
Mother Machine	untreated	1.07896	1.31102		1 ug/mL	0.863684	1.09531
Mother Machine	untreated	1.07996	1.22735		1 ug/mL	0.91843	1.04351
Mother Machine	untreated	1.08096	2.05037		1 ug/mL	0.863684	1.09531
Mother Machine	untreated	1.08196	1.56115		1 ug/mL	1.11297	1.36715
Mother Machine	untreated	1.08296	1.51006		1 ug/mL	1.11506	1.3754
Mother Machine	untreated	1.08396	1.37446		1 ug/mL	1.18071	1.23835
Mother Machine	untreated	1.08496	1.48335		1 ug/mL	1.06198	1.29686
Mother Machine	untreated	1.08596	1.54862		1 ug/mL	0.922979	1.23837
Mother Machine	untreated	1.08696	1.61051		1 ug/mL	1.11592	1.10134
Mother Machine	untreated	1.08796	2.01848		1 ug/mL	1.18196	1.21876
Mother Machine	untreated	1.08896	1.54896		1 ug/mL	1.04976	1.22856
Mother Machine	untreated	1.08996	1.35128		1 ug/mL	1.05021	0.980401
Mother Machine	untreated	1.09096	1.81819		1 ug/mL	0.988177	1.03142
Mother Machine	untreated	1.09196	1.85006		1 ug/mL	0.923887	1.29157
Mother Machine	untreated	1.09296	1.47447		1 ug/mL	1.18894	1.29715
Mother Machine	untreated	1.09396	1.68086		1 ug/mL	1.31671	0.828206
Mother Machine	untreated	1.09496	1.60311		1 ug/mL	1.18673	1.30118
Mother Machine	untreated	1.09596	1.37026		1 ug/mL	1.18146	1.16029
Mother Machine	untreated	1.09696	1.6723		1 ug/mL	1.05141	1.10707
Mother Machine	untreated	1.09796	1.49367		1 ug/mL	1.11835	1.16468
Mother Machine	untreated	1.09896	1.73303		1 ug/mL	0.987037	1.10172
Mother Machine	untreated	1.09996	2.06279		1 ug/mL	1.05624	1.21235
Mother Machine	untreated	1.10096	1.82421		1 ug/mL	1.24792	1.11143
Mother Machine	untreated	1.10196	1.23641		1 ug/mL	1.05253	1.30052
Mother Machine	untreated	1.10296	1.52918		1 ug/mL	0.988778	1.2324
Mother Machine	untreated	1.10396	1.49012		1 ug/mL	1.25557	0.963394
Mother Machine	untreated	1.10496	1.6733		1 ug/mL	1.11789	0.974677
Mother Machine	untreated	1.10596	1.98721		1 ug/mL	0.984287	1.24234
Mother Machine	untreated	1.10696	1.75193		1 ug/mL	1.12031	1.16802
Mother Machine	untreated	1.10796	1.49089		1 ug/mL	0.989397	1.10059
Mother Machine	untreated	1.10896	1.36008		1 ug/mL	1.05372	1.21825
Mother Machine	untreated	1.10996	1.42719		1 ug/mL	1.17975	1.10904
Mother Machine	untreated	1.11096	1.85226		1 ug/mL	1.24626	1.36972
Mother Machine	untreated	1.11196	1.9401		1 ug/mL	1.31996	1.22998
Mother Machine	untreated	1.11296	1.752		1 ug/mL	1.11378	1.04151
Mother Machine	untreated	1.11396	1.63158		1 ug/mL	1.1252	0.972169
Mother Machine	untreated	1.11496	1.74396		1 ug/mL	0.990139	1.10325
Mother Machine	untreated	1.11596	1.68514		1 ug/mL	1.11739	1.30015
Mother Machine	untreated	1.11696	1.30365		1 ug/mL	1.0533	1.23079
Mother Machine	untreated	1.11796	1.5495		1 ug/mL	1.11378	1.04151
Mother Machine	untreated	1.11896	1.67321		1 ug/mL	1.1252	0.972169
Mother Machine	untreated	1.11996	1.75284		1 ug/mL	0.990139	1.10325
Mother Machine	untreated	1.12096	1.34124		1 ug/mL	1.11739	1.30015
Mother Machine	untreated	1.12196	1.69252		1 ug/mL	1.0533	1.23079
Mother Machine	untreated	1.12296	1.29628		1 ug/mL	1.04942	1.11348
Mother Machine	untreated	1.12396	2.14403		1 ug/mL	0.992406	1.48307
Mother Machine	untreated	1.12496	2.17836		1 ug/mL	1.11709	1.16964
Mother Machine	untreated	1.12596	1.4179		1 ug/mL	0.987543	1.21204
Mother Machine	untreated	1.12696	1.62387		1 ug/mL	1.11948	1.03509
Mother Machine	untreated	1.12796	1.50317		1 ug/mL	1.25035	0.968124
Mother Machine	untreated	1.12896	1.82158		1 ug/mL	1.25429	1.15223
Mother Machine	untreated	1.12996	1.6204		1 ug/mL	1.17999	0.835173
Mother Machine	untreated	1.13096	1.75651		1 ug/mL	0.985726	1.36878
Mother Machine	untreated	1.13196	1.76059		1 ug/mL	0.924205	1.29056
Mother Machine	untreated	1.13296	1.59471		1 ug/mL	1.1903	1.14904
Mother Machine	untreated	1.13396	1.86756		1 ug/mL	1.24996	1.27532
Mother Machine	untreated	1.13496	1.759		1 ug/mL	1.30983	1.04206
Mother Machine	untreated	1.13596	1.29523		1 ug/mL	1.1837	1.23463
Mother Machine	untreated	1.13696	1.28723		1 ug/mL	0.926585	1.17237
Mother Machine	untreated	1.13796	1.62538		1 ug/mL	1.05382	1.21994
Mother Machine	untreated	1.13896	1.47421		1 ug/mL	0.987414	1.23316
Mother Machine	untreated	1.13996	1.74985		1 ug/mL	0.986932	1.03055
Mother Machine	untreated	1.14096	1.74956		1 ug/mL	1.04997	1.0296
Mother Machine	untreated	1.14196	1.22604		1 ug/mL	1.24996	1.27532
Mother Machine	untreated	1.14296	1.24347		1 ug/mL	1.30983	1.04206
Mother Machine	untreated	1.14396	1.60596		1 ug/mL	1.1837	1.23463
Mother Machine	untreated	1.14496	1.92769		1 ug/mL	0.926585	1.17237
Mother Machine	untreated	1.14596	1.4042		1 ug/mL	1.05382	1.21994
Mother Machine	untreated	1.14696	1.55739		1 ug/mL	0.987414	1.23316
Mother Machine	untreated	1.14796	1.5552		1 ug/mL	0.986932	1.03055
Mother Machine	untreated	1.14896	1.16788		1 ug/mL	1.04997	1.0296
Mother Machine	untreated	1.14996	1.36447		1 ug/mL	1.18289	1.04199
Mother Machine	untreated	1.15096	1.8038		1 ug/mL	0.988864	1.23243
Mother Machine	untreated	1.15196	1.7521		1 ug/mL	1.1185	0.957568
Mother Machine	untreated	1.15296	1.76234		1 ug/mL	1.11695	1.16783
Mother Machine	untreated	1.15396	2.04552		1 ug/mL	1.37376	0.978678
Mother Machine	untreated	1.15496	1.29192		1 ug/mL	1.05174	1.16722
Mother Machine	untreated	1.15596	1.44078		1 ug/mL	1.11991	1.21594
Mother Machine	untreated	1.15696	1.73373		1 ug/mL	1.18547	1.42948
Mother Machine	untreated	1.15796	1.60853		1 ug/mL	1.11886	1.07731
Mother Machine	untreated	1.15896	1.62478		1 ug/mL	1.05146	1.43557
Mother Machine	untreated	1.15996	1.55342		1 ug/mL	1.11678	1.36439
Mother Machine	untreated	1.16096	2.07185		1 ug/mL	0.924695	1.16171
Mother Machine	untreated	1.16196	1.6184		1 ug/mL	1.11363	1.17772
Mother Machine	untreated	1.16296	1.68835		1 ug/mL	0.9934	1.09418
Mother Machine	untreated	1.16396	1.73129		1 ug/mL	1.11517	1.09518
Mother Machine	untreated	1.16496	1.72484		1 ug/mL	0.988407	1.37124
Mother Machine	untreated	1.16596	2.05738		1 ug/mL	0.854714	1.4362
Mother Machine	untreated	1.16696	1.60319		1 ug/mL	1.05444	1.23718
Mother Machine	untreated	1.16796	1.68107		1 ug/mL	1.18932	1.22686
Mother Machine	untreated	1.16896	2.05671		1 ug/mL	1.11122	0.984067
Mother Machine	untreated	1.16996	1.68257		1 ug/mL	1.11317	1.31822
Mother Machine	untreated	1.17096	1.81724		1 ug/mL	1.05129	1.54478
Mother Machine	untreated	1.17196	1.29113		1 ug/mL	1.11888	1.09875
Mother Machine	untreated	1.17296	1.54739		1 ug/mL	1.31152	1.10125
Mother Machine	untreated	1.17396	1.34446		1 ug/mL	0.920789	1.15958
Mother Machine	untreated	1.17496	1.49872		1 ug/mL	1.04927	1.3061
Mother Machine	untreated	1.17596	1.36533		1 ug/mL	1.18308	1.23997
Mother Machine	untreated	1.17696	1.62905		1 ug/mL	1.05017	1.17363
Mother Machine	untreated	1.17796	1.24333		1 ug/mL	0.988423	1.11084
Mother Machine	untreated	1.17896	1.5625		1 ug/mL	1.05039	1.2714
Mother Machine	untreated	1.17996	1.16533		1 ug/mL	0.924427	1.03362
Mother Machine	untreated	1.18096	1.36454		1 ug/mL	1.18308	1.23997
Mother Machine	untreated	1.18196	1.80865		1 ug/mL	1.05017	1.17363
Mother Machine	untreated	1.18296	1.41637		1 ug/mL	0.988423	1.11084
Mother Machine	untreated	1.18396	1.4244		1 ug/mL	1.05039	1.2714
Mother Machine	untreated	1.18496	1.41044		1 ug/mL	0.924427	1.03362
Mother Machine	untreated	1.18596	1.35936		1 ug/mL	1.18192	0.971908
Mother Machine	untreated	1.18696	1.48315		1 ug/mL	1.18225	1.16851
Mother Machine	untreated	1.18796	1.16258		1 ug/mL	1.1146	1.22391
Mother Machine	untreated	1.18896	1.42401		1 ug/mL	1.11591	1.305
Mother Machine	untreated	1.18996	1.36609		1 ug/mL	1.11536	1.17126
Mother Machine	untreated	1.19096	1.63302		1 ug/mL	1.04922	1.02329
Mother Machine	untreated	1.19196	1.55456		1 ug/mL	1.05171	1.1707
Mother Machine	untreated	1.19296	1.48884		1 ug/mL	0.923005	1.04206
Mother Machine	untreated	1.19396	1.61269		1 ug/mL	1.18305	1.10377
Mother Machine	untreated	1.19496	1.54622		1 ug/mL	1.1185	1.3573
Mother Machine	untreated	1.19596	1.87602		1 ug/mL	1.1185	1.3573
Mother Machine	untreated	1.19696	1.2351		1 ug/mL	0.988342	1.49421
Mother Machine	untreated	1.19796	1.61191		1 ug/mL	1.24853	1.30196
Mother Machine	untreated	1.19896	1.30666		1 ug/mL	1.11712	1.29672
Mother Machine	untreated	1.19996	1.8181		1 ug/mL	1.11894	1.03398
Mother Machine	untreated	1.20096	1.87874		1 ug/mL	1.32182	1.03224
Mother Machine	untreated	1.20196	1.41935		1 ug/mL	1.12779	1.08748
Mother Machine	untreated	1.20296	1.88294		1 ug/mL	1.12409	1.28334
Mother Machine	untreated	1.20396	2.00626		1 ug/mL	0.989058	1.04362
Mother Machine	untreated	1.20496	1.74641		1 ug/mL	1.12177	0.909994
Mother Machine	untreated	1.20596	1.8065		1 ug/mL	1.18636	1.47503
Mother Machine	untreated	1.20696	1.4244		1 ug/mL	1.17917	1.34935
Mother Machine	untreated	1.20796	1.48639		1 ug/mL	1.11463	1.31135
Mother Machine	untreated	1.20896	1.40763		1 ug/mL	1.11605	1.48391
Mother Machine	untreated	1.20996	1.68034		1 ug/mL	0.988822	1.03808
Mother Machine	untreated	1.21096	1.28226		1 ug/mL	0.928148	1.30744
Mother Machine	untreated	1.21196	1.4056		1 ug/mL	1.05278	1.36233
Mother Machine	untreated	1.21296	1.5575		1 ug/mL	0.988822	1.03808
Mother Machine	untreated	1.21396	1.60619		1 ug/mL	0.928148	1.30744
Mother Machine	untreated	1.21496	1.29055		1 ug/mL	1.05278	1.36233
Mother Machine	untreated	1.21596	1.56075		1 ug/mL	1.184	1.04224
Mother Machine	untreated	1.21696	1.22354		1 ug/mL	0.994291	1.1626
Mother Machine	untreated	1.21796	1.28565		1 ug/mL	1.0554	1.03668
Mother Machine	untreated	1.21896	1.17259		1 ug/mL	0.983667	1.30174
Mother Machine	untreated	1.21996	1.30121		1 ug/mL	1.05541	1.29999
Mother Machine	untreated	1.22096	1.5036		1 ug/mL	0.982857	1.10765
Mother Machine	untreated	1.22196	1.35906		1 ug/mL	0.918127	1.30092
Mother Machine	untreated	1.22296	1.48975		1 ug/mL	1.1152	1.21177
Mother Machine	untreated	1.22396	1.67497		1 ug/mL	1.1867	1.55143
Mother Machine	untreated	1.22496	1.68465		1 ug/mL	1.12325	1.155
Mother Machine	untreated	1.22596	1.36762		1 ug/mL	1.24713	1.10553
Mother Machine	untreated	1.22696	1.49016		1 ug/mL	1.18001	1.09207
Mother Machine	untreated	1.22796	1.49338		1 ug/mL	1.05313	1.47542
Mother Machine	untreated	1.22896	1.28765		1 ug/mL	1.32026	1.10003
Mother Machine	untreated	1.22996	1.43507		1 ug/mL	1.44263	0.984621
Mother Machine	untreated	1.23096	1.2329		1 ug/mL	1.18151	1.0297
Mother Machine	untreated	1.23196	1.8737		1 ug/mL	1.18751	0.900423
Mother Machine	untreated	1.23296	1.29012		1 ug/mL	0.982641	1.48758
Mother Machine	untreated	1.23396	0.881411		1 ug/mL	0.983669	1.03977
Mother Machine	untreated	1.23496	1.63404		1 ug/mL	1.05534	1.1523
Mother Machine	untreated	1.23596	1.49939		1 ug/mL	1.18139	1.23882
Mother Machine	untreated	1.23696	1.49882		1 ug/mL	1.18987	0.836274
Mother Machine	untreated	1.23796	1.68455		1 ug/mL	1.0545	1.29392
Mother Machine	untreated	1.23896	1.61467		1 ug/mL	1.05395	1.36018
Mother Machine	untreated	1.23996	1.49486		1 ug/mL	1.4456	1.16299
Mother Machine	untreated	1.24096	1.62041		1 ug/mL	1.18049	1.10018
Mother Machine	untreated	1.24196	1.42643
Mother Machine	untreated	1.24296	1.5539
Mother Machine	untreated	1.24396	1.81994
Mother Machine	untreated	1.24496	1.40068
Mother Machine	untreated	1.24596	1.17403
Mother Machine	untreated	1.24696	1.41702
Mother Machine	untreated	1.24796	1.93371
Mother Machine	untreated	1.24896	1.54492
Mother Machine	untreated	1.24996	1.48692
Mother Machine	untreated	1.25096	1.3702
Mother Machine	untreated	1.25196	1.7952
Mother Machine	untreated	1.25296	1.41494
Mother Machine	untreated	1.25396	1.55699
Mother Machine	untreated	1.25496	1.43424
Mother Machine	untreated	1.25596	1.04524
Mother Machine	untreated	1.25696	1.69064
Mother Machine	untreated	1.25796	1.86146
Mother Machine	untreated	1.25896	1.82094
Mother Machine	untreated	1.25996	1.42953
Mother Machine	untreated	1.26096	1.28186
Mother Machine	untreated	1.26196	1.6868
Mother Machine	untreated	1.26296	1.41926
Mother Machine	untreated	1.26396	1.4268
Mother Machine	untreated	1.26496	1.68087
Mother Machine	untreated	1.26596	1.03972
Mother Machine	untreated	1.26696	1.61749
Mother Machine	untreated	1.26796	1.41607
Mother Machine	untreated	1.26896	1.63042
Mother Machine	untreated	1.26996	1.76117
Mother Machine	untreated	1.27096	1.50288
Mother Machine	untreated	1.27196	1.82119
Mother Machine	untreated	1.27296	1.553
Mother Machine	untreated	1.27396	1.42033
Mother Machine	untreated	1.27496	1.34578
Mother Machine	untreated	1.27596	1.49485
Mother Machine	untreated	1.27696	1.62191
Mother Machine	untreated	1.27796	1.41599
Mother Machine	untreated	1.27896	1.54615
Mother Machine	untreated	1.27996	1.24676
Mother Machine	untreated	1.28096	1.41463
Mother Machine	untreated	1.28196	1.42407
Mother Machine	untreated	1.28296	1.37426
Mother Machine	untreated	1.28396	1.42884
Mother Machine	untreated	1.28496	1.68323
Mother Machine	untreated	1.28596	1.79412
Mother Machine	untreated	1.28696	1.61149
Mother Machine	untreated	1.28796	1.60096
Mother Machine	untreated	1.28896	1.72511
Mother Machine	untreated	1.28996	1.55321
Mother Machine	untreated	1.29096	1.61025
Mother Machine	untreated	1.29196	1.75988
Mother Machine	untreated	1.29296	1.36154
Mother Machine	untreated	1.29396	1.37219
Mother Machine	untreated	1.29496	1.43045
Mother Machine	untreated	1.29596	1.5063
Mother Machine	untreated	1.29696	2.13115
Mother Machine	untreated	1.29796	1.68724
Mother Machine	untreated	1.29896	1.56898
Mother Machine	untreated	1.29996	1.68171
Mother Machine	untreated	1.30096	1.73039
Mother Machine	untreated	1.30196	1.81772
Mother Machine	untreated	1.30296	1.48465
Mother Machine	untreated	1.30396	1.69243
Mother Machine	untreated	1.30496	1.49376
Mother Machine	untreated	1.30596	1.81211
Mother Machine	untreated	1.30696	1.61408
Mother Machine	untreated	1.30796	1.40802
Mother Machine	untreated	1.30896	1.61733
Mother Machine	untreated	1.30996	1.74576
Mother Machine	untreated	1.31096	1.61025
Mother Machine	untreated	1.31196	1.75988
Mother Machine	untreated	1.31296	1.36154
Mother Machine	untreated	1.31396	1.37219
Mother Machine	untreated	1.31496	1.43045
Mother Machine	untreated	1.31596	1.5063
Mother Machine	untreated	1.31696	2.13115
Mother Machine	untreated	1.31796	1.68724
Mother Machine	untreated	1.31896	1.56898
Mother Machine	untreated	1.31996	1.68171
Mother Machine	untreated	1.32096	1.73039
Mother Machine	untreated	1.32196	1.81772
Mother Machine	untreated	1.32296	1.48465
Mother Machine	untreated	1.32396	1.69243
Mother Machine	untreated	1.32496	1.49376
Mother Machine	untreated	1.32596	1.81211
Mother Machine	untreated	1.32696	1.61408
Mother Machine	untreated	1.32796	1.40802
Mother Machine	untreated	1.32896	1.61733
Mother Machine	untreated	1.32996	1.74576
Mother Machine	untreated	1.33096	1.75501
Mother Machine	untreated	1.33196	1.95502
Mother Machine	untreated	1.33296	1.8515
Mother Machine	untreated	1.33396	1.17008
Mother Machine	untreated	1.33496	1.42229
Mother Machine	untreated	1.33596	1.56224
Mother Machine	untreated	1.33696	1.67797
Mother Machine	untreated	1.33796	1.68886
Mother Machine	untreated	1.33896	1.61101
Mother Machine	untreated	1.33996	1.81591
Mother Machine	untreated	1.34096	1.74744
Mother Machine	untreated	1.34196	1.67045
Mother Machine	untreated	1.34296	1.80569
Mother Machine	untreated	1.34396	1.60244
Mother Machine	untreated	1.34496	1.47826
Mother Machine	untreated	1.34596	1.55225
Mother Machine	untreated	1.34696	1.81474
Mother Machine	untreated	1.34796	1.62429
Mother Machine	untreated	1.34896	1.41137
Mother Machine	untreated	1.34996	1.69403
Mother Machine	untreated	1.35096	1.35147
Mother Machine	untreated	1.35196	2.01047
Mother Machine	untreated	1.35296	1.93237
Mother Machine	untreated	1.35396	1.74105
Mother Machine	untreated	1.35496	1.54514
Mother Machine	untreated	1.35596	1.55839
Mother Machine	untreated	1.35696	1.40861
Mother Machine	untreated	1.35796	1.4848
Mother Machine	untreated	1.35896	1.48999
Mother Machine	untreated	1.35996	1.93321
Mother Machine	untreated	1.36096	1.73972
Mother Machine	untreated	1.36196	1.60459
Mother Machine	untreated	1.36296	1.23581
Mother Machine	untreated	1.36396	1.2193
Mother Machine	untreated	1.36496	1.42254
Mother Machine	untreated	1.36596	1.48377
Mother Machine	untreated	1.36696	1.70707
Mother Machine	untreated	1.36796	1.62371
Mother Machine	untreated	1.36896	1.56187
Mother Machine	untreated	1.36996	1.54429
Mother Machine	untreated	1.37096	1.53917
Mother Machine	untreated	1.37196	1.66978
Mother Machine	untreated	1.37296	1.55903
Mother Machine	untreated	1.37396	1.73966
Mother Machine	untreated	1.37496	1.56514
Mother Machine	untreated	1.37596	1.80285
Mother Machine	untreated	1.37696	1.48332
Mother Machine	untreated	1.37796	1.86022
Mother Machine	untreated	1.37896	1.54225
Mother Machine	untreated	1.37996	1.80684
Mother Machine	untreated	1.38096	1.81132
Mother Machine	untreated	1.38196	1.42187
Mother Machine	untreated	1.38296	1.16213
Mother Machine	untreated	1.38396	1.3623
Mother Machine	untreated	1.38496	1.46238
Mother Machine	untreated	1.38596	1.49375
Mother Machine	untreated	1.38696	1.23
Mother Machine	untreated	1.38796	1.61609
Mother Machine	untreated	1.38896	1.3479
Mother Machine	untreated	1.38996	1.68879
Mother Machine	untreated	1.39096	1.67513
Mother Machine	untreated	1.39196	1.99784
Mother Machine	untreated	1.39296	1.27271
Mother Machine	untreated	1.39396	1.62391
Mother Machine	untreated	1.39496	1.41967
Mother Machine	untreated	1.39596	1.82315
Mother Machine	untreated	1.39696	1.66574
Mother Machine	untreated	1.39796	1.48496
Mother Machine	untreated	1.39896	1.4904
Mother Machine	untreated	1.39996	1.87054
Mother Machine	untreated	1.40096	1.35404
Mother Machine	untreated	1.40196	1.79475
Mother Machine	untreated	1.40296	1.6552
Mother Machine	untreated	1.40396	1.35928
Mother Machine	untreated	1.40496	1.4245
Mother Machine	untreated	1.40596	1.65948
Mother Machine	untreated	1.40696	1.2164
Mother Machine	untreated	1.40796	1.48817
Mother Machine	untreated	1.40896	1.92182
Mother Machine	untreated	1.40996	1.48096
Mother Machine	untreated	1.41096	1.66477
Mother Machine	untreated	1.41196	1.67684
Mother Machine	untreated	1.41296	1.56689
Mother Machine	untreated	1.41396	1.55083
Mother Machine	untreated	1.41496	1.79834
Mother Machine	untreated	1.41596	1.6104
Mother Machine	untreated	1.41696	1.27521
Mother Machine	untreated	1.41796	1.50177
Mother Machine	untreated	1.41896	2.05178
Mother Machine	untreated	1.41996	1.28848
Mother Machine	untreated	1.42096	1.75988
Mother Machine	untreated	1.42196	1.30007
Mother Machine	untreated	1.42296	1.80705
Mother Machine	untreated	1.42396	1.35507
Mother Machine	untreated	1.42496	1.63145
Mother Machine	untreated	1.42596	1.79853
Mother Machine	untreated	1.42696	1.50931
Mother Machine	untreated	1.42796	1.46872
Mother Machine	untreated	1.42896	1.50132
Mother Machine	untreated	1.42996	1.42902
Mother Machine	untreated	1.43096	1.36386
Mother Machine	untreated	1.43196	1.41279
Mother Machine	untreated	1.43296	1.50177
Mother Machine	untreated	1.43396	2.05178
Mother Machine	untreated	1.43496	1.28848
Mother Machine	untreated	1.43596	1.75988
Mother Machine	untreated	1.43696	1.30007
Mother Machine	untreated	1.43796	1.80705
Mother Machine	untreated	1.43896	1.35507
Mother Machine	untreated	1.43996	1.63145
Mother Machine	untreated	1.44096	1.79853
Mother Machine	untreated	1.44196	1.50931
Mother Machine	untreated	1.44296	1.46872
Mother Machine	untreated	1.44396	1.50132
Mother Machine	untreated	1.44496	1.42902
Mother Machine	untreated	1.44596	1.36386
Mother Machine	untreated	1.44696	1.41279
Mother Machine	untreated	1.44796	1.47061
Mother Machine	untreated	1.44896	1.6706
Mother Machine	untreated	1.44996	1.43658
Mother Machine	untreated	1.45096	1.68275
Mother Machine	untreated	1.45196	1.62088
Mother Machine	untreated	1.45296	1.37086
Mother Machine	untreated	1.45396	1.9355
Mother Machine	untreated	1.45496	1.80465
Mother Machine	untreated	1.45596	1.68327
Mother Machine	untreated	1.45696	1.42215
Mother Machine	untreated	1.45796	1.6063
Mother Machine	untreated	1.45896	1.43163
Mother Machine	untreated	1.45996	1.4315
Mother Machine	untreated	1.46096	1.85909
Mother Machine	untreated	1.46196	1.74846
Mother Machine	untreated	1.46296	1.29828
Mother Machine	untreated	1.46396	1.56458
Mother Machine	untreated	1.46496	1.67907
Mother Machine	untreated	1.46596	1.87474
Mother Machine	untreated	1.46696	1.69396
Mother Machine	untreated	1.46796	1.67744
Mother Machine	untreated	1.46896	1.60211
Mother Machine	untreated	1.46996	1.936
Mother Machine	untreated	1.47096	1.42468
Mother Machine	untreated	1.47196	1.23252
Mother Machine	untreated	1.47296	1.54603
Mother Machine	untreated	1.47396	1.62283
Mother Machine	untreated	1.47496	1.75711
Mother Machine	untreated	1.47596	1.55902
Mother Machine	untreated	1.47696	1.49005
Mother Machine	untreated	1.47796	1.56197
Mother Machine	untreated	1.47896	1.67244
Mother Machine	untreated	1.47996	1.42593
Mother Machine	untreated	1.48096	1.47623
Mother Machine	untreated	1.48196	1.55963
Mother Machine	untreated	1.48296	1.55281
Mother Machine	untreated	1.48396	1.87461
Mother Machine	untreated	1.48496	1.48211
Mother Machine	untreated	1.48596	1.40683
Mother Machine	untreated	1.48696	1.689
Mother Machine	untreated	1.48796	1.21862
Mother Machine	untreated	1.48896	1.17275
Mother Machine	untreated	1.48996	1.42131
Mother Machine	untreated	1.49096	1.61659
Mother Machine	untreated	1.49196	1.34607
Mother Machine	untreated	1.49296	1.73014
Mother Machine	untreated	1.49396	1.67194
Mother Machine	untreated	1.49496	1.36652
Mother Machine	untreated	1.49596	1.92029
Mother Machine	untreated	1.49696	1.23125
Mother Machine	untreated	1.49796	1.74772
Mother Machine	untreated	1.49896	1.29225
Mother Machine	untreated	1.49996	1.4944
Mother Machine	untreated	1.50096	1.87668
Mother Machine	untreated	1.50196	1.42454
Mother Machine	untreated	1.50296	1.36589
Mother Machine	untreated	1.50396	1.69329
Mother Machine	untreated	1.50496	1.80427
Mother Machine	untreated	1.50596	1.59862
Mother Machine	untreated	1.50696	1.47723
Mother Machine	untreated	1.50796	1.47894
Mother Machine	untreated	1.50896	1.74968
Mother Machine	untreated	1.50996	1.68732
Mother Machine	untreated	1.51096	1.3457
Mother Machine	untreated	1.51196	1.81996
Mother Machine	untreated	1.51296	1.94058
Mother Machine	untreated	1.51396	1.54466
Mother Machine	untreated	1.51496	1.61754
Mother Machine	untreated	1.51596	1.87179
Mother Machine	untreated	1.51696	1.42099
Mother Machine	untreated	1.51796	1.68538
Mother Machine	untreated	1.51896	1.54912
Mother Machine	untreated	1.51996	1.48532
Mother Machine	untreated	1.52096	1.69205
Mother Machine	untreated	1.52196	1.30367
Mother Machine	untreated	1.52296	1.81648
Mother Machine	untreated	1.52396	1.55012
Mother Machine	untreated	1.52496	1.16123
Mother Machine	untreated	1.52596	1.55936
Mother Machine	untreated	1.52696	1.56374
Mother Machine	untreated	1.52796	1.41508
Mother Machine	untreated	1.52896	1.99458
Mother Machine	untreated	1.52996	1.80456
Mother Machine	untreated	1.53096	1.42992
Mother Machine	untreated	1.53196	1.23728
Mother Machine	untreated	1.53296	1.74547
Mother Machine	untreated	1.53396	1.73991
Mother Machine	untreated	1.53496	1.44181
Mother Machine	untreated	1.53596	1.24307
Mother Machine	untreated	1.53696	1.99572
Mother Machine	untreated	1.53796	1.55687
Mother Machine	untreated	1.53896	1.547
Mother Machine	untreated	1.53996	1.28379
Mother Machine	untreated	1.54096	1.42831
Mother Machine	untreated	1.54196	1.04963
Mother Machine	untreated	1.54296	1.48028
Mother Machine	untreated	1.54396	1.48537
Mother Machine	untreated	1.54496	1.48704
Mother Machine	untreated	1.54596	1.54773
Mother Machine	untreated	1.54696	1.68249
Mother Machine	untreated	1.54796	1.62095
Mother Machine	untreated	1.54896	2.05642
Mother Machine	untreated	1.54996	1.34633
Mother Machine	untreated	1.55096	1.56071
Mother Machine	untreated	1.55196	1.34988
Mother Machine	untreated	1.55296	1.49487
Mother Machine	untreated	1.55396	1.30109
Mother Machine	untreated	1.55496	1.22981
Mother Machine	untreated	1.55596	1.68351
Mother Machine	untreated	1.55696	1.2933
Mother Machine	untreated	1.55796	1.24094
Mother Machine	untreated	1.55896	1.74262
Mother Machine	untreated	1.55996	1.41613
Mother Machine	untreated	1.56096	1.49481
Mother Machine	untreated	1.56196	1.43484
Mother Machine	untreated	1.56296	1.62359
Mother Machine	untreated	1.56396	2.12437
Mother Machine	untreated	1.56496	1.75124
Mother Machine	untreated	1.56596	1.49066
Mother Machine	untreated	1.56696	1.82487
Mother Machine	untreated	1.56796	1.24441
Mother Machine	untreated	1.56896	1.75165
Mother Machine	untreated	1.56996	1.1032
Mother Machine	untreated	1.57096	1.54864
Mother Machine	untreated	1.57196	1.49416
Mother Machine	untreated	1.57296	1.43137
Mother Machine	untreated	1.57396	1.3646
Mother Machine	untreated	1.57496	1.85848
Mother Machine	untreated	1.57596	1.24683
Mother Machine	untreated	1.57696	1.47603
Mother Machine	untreated	1.57796	1.36319
Mother Machine	untreated	1.57896	1.75166
Mother Machine	untreated	1.57996	1.48512
Mother Machine	untreated	1.58096	1.88335
Mother Machine	untreated	1.58196	1.62431
Mother Machine	untreated	1.58296	1.35747
Mother Machine	untreated	1.58396	1.0358
Mother Machine	untreated	1.58496	1.55937
Mother Machine	untreated	1.58596	1.67336
Mother Machine	untreated	1.58696	1.55717
Mother Machine	untreated	1.58796	1.88367
Mother Machine	untreated	1.58896	1.5488
Mother Machine	untreated	1.58996	1.54946
Mother Machine	untreated	1.59096	1.67508
Mother Machine	untreated	1.59196	1.54224
Mother Machine	untreated	1.59296	1.563
Mother Machine	untreated	1.59396	1.221
Mother Machine	untreated	1.59496	1.47555
Mother Machine	untreated	1.59596	1.66791
Mother Machine	untreated	1.59696	1.49384
Mother Machine	untreated	1.59796	1.63298
Mother Machine	untreated	1.59896	1.11594
Mother Machine	untreated	1.59996	1.29465
Mother Machine	untreated	1.60096	1.62487
Mother Machine	untreated	1.60196	1.28431
Mother Machine	untreated	1.60296	1.42447
Mother Machine	untreated	1.60396	1.75666
Mother Machine	untreated	1.60496	1.60549
Mother Machine	untreated	1.60596	1.5559
Mother Machine	untreated	1.60696	1.54193
Mother Machine	untreated	1.60796	1.17417
Mother Machine	untreated	1.60896	1.5654
Mother Machine	untreated	1.60996	1.48596
Mother Machine	untreated	1.61096	1.79987
Mother Machine	untreated	1.61196	1.03098
Mother Machine	untreated	1.61296	1.4211
Mother Machine	untreated	1.61396	1.29379
Mother Machine	untreated	1.61496	1.80284
Mother Machine	untreated	1.61596	1.35575
Mother Machine	untreated	1.61696	1.29767
Mother Machine	untreated	1.61796	1.2948
Mother Machine	untreated	1.61896	1.48031
Mother Machine	untreated	1.61996	1.46954
Mother Machine	untreated	1.62096	1.90579
Mother Machine	untreated	1.62196	0.894097
Mother Machine	untreated	1.62296	0.897138
Mother Machine	untreated	1.62396	1.03149
Mother Machine	untreated	1.62496	1.48127
Mother Machine	untreated	1.62596	1.6276
Mother Machine	untreated	1.62696	1.41759
Mother Machine	untreated	1.62796	1.37201
Mother Machine	untreated	1.62896	1.36393
Mother Machine	untreated	1.62996	1.28825
Mother Machine	untreated	1.63096	1.35472
Mother Machine	untreated	1.63196	1.60925
Mother Machine	untreated	1.63296	1.28009
Mother Machine	untreated	1.63396	1.27981
Mother Machine	untreated	1.63496	1.54203
Mother Machine	untreated	1.63596	1.67084
Mother Machine	untreated	1.63696	1.99492
Mother Machine	untreated	1.63796	1.68483
Mother Machine	untreated	1.63896	1.35783
Mother Machine	untreated	1.63996	1.16719
Mother Machine	untreated	1.64096	1.73198
Mother Machine	untreated	1.64196	1.54423
Mother Machine	untreated	1.64296	1.35632
Mother Machine	untreated	1.64396	1.30445
Mother Machine	untreated	1.64496	1.41837
Mother Machine	untreated	1.64596	1.87252
Mother Machine	untreated	1.64696	1.72613
Mother Machine	untreated	1.64796	1.35851
Mother Machine	untreated	1.64896	1.72613
Mother Machine	untreated	1.64996	1.35851
Mother Machine	untreated	1.65096	1.50181
Mother Machine	untreated	1.65196	1.49701
Mother Machine	untreated	1.65296	1.47342
Mother Machine	untreated	1.65396	1.69069
Mother Machine	untreated	1.65496	1.62361
Mother Machine	untreated	1.65596	1.4954
Mother Machine	untreated	1.65696	1.42356
Mother Machine	untreated	1.65796	1.427
Mother Machine	untreated	1.65896	1.2373
Mother Machine	untreated	1.65996	1.6343
Mother Machine	untreated	1.66096	1.7625
Mother Machine	untreated	1.66196	1.68154
Mother Machine	untreated	1.66296	1.68665
Mother Machine	untreated	1.66396	1.94638
Mother Machine	untreated	1.66496	1.55872
Mother Machine	untreated	1.66596	1.67748
Mother Machine	untreated	1.66696	1.69642
Mother Machine	untreated	1.66796	1.74724
Mother Machine	untreated	1.66896	2.17916
Mother Machine	untreated	1.66996	1.35575
Mother Machine	untreated	1.67096	1.5389
Mother Machine	untreated	1.67196	1.55608
Mother Machine	untreated	1.67296	1.23822
Mother Machine	untreated	1.67396	1.66258
Mother Machine	untreated	1.67496	1.16528
Mother Machine	untreated	1.67596	1.7508
Mother Machine	untreated	1.67696	1.94644
Mother Machine	untreated	1.67796	1.89315
Mother Machine	untreated	1.67896	1.68017
Mother Machine	untreated	1.67996	2.18089
Mother Machine	untreated	1.68096	1.54119
Mother Machine	untreated	1.68196	1.30024
Mother Machine	untreated	1.68296	1.53946
Mother Machine	untreated	1.68396	1.49279
Mother Machine	untreated	1.68496	1.34997
Mother Machine	untreated	1.68596	1.61316
Mother Machine	untreated	1.68696	1.54326
Mother Machine	untreated	1.68796	1.75389
Mother Machine	untreated	1.68896	1.41932
Mother Machine	untreated	1.68996	1.53501
Mother Machine	untreated	1.69096	1.48754
Mother Machine	untreated	1.69196	1.42986
Mother Machine	untreated	1.69296	1.29066
Mother Machine	untreated	1.69396	1.27436
Mother Machine	untreated	1.69496	1.47496
Mother Machine	untreated	1.69596	1.47433
Mother Machine	untreated	1.69696	1.93817
Mother Machine	untreated	1.69796	1.36221
Mother Machine	untreated	1.69896	1.55963
Mother Machine	untreated	1.69996	1.48708
Mother Machine	untreated	1.70096	1.62415
Mother Machine	untreated	1.70196	1.34454
Mother Machine	untreated	1.70296	1.42147
Mother Machine	untreated	1.70396	1.56339
Mother Machine	untreated	1.70496	1.93881
Mother Machine	untreated	1.70596	1.75134
Mother Machine	untreated	1.70696	1.92416
Mother Machine	untreated	1.70796	1.17405
Mother Machine	untreated	1.70896	2.08903
Mother Machine	untreated	1.70996	1.24032
Mother Machine	untreated	1.71096	1.49036
Mother Machine	untreated	1.71196	1.55128
Mother Machine	untreated	1.71296	1.55803
Mother Machine	untreated	1.71396	1.48316
Mother Machine	untreated	1.71496	1.8183
Mother Machine	untreated	1.71596	1.30279
Mother Machine	untreated	1.71696	1.34391
Mother Machine	untreated	1.71796	1.42683
Mother Machine	untreated	1.71896	1.53804
Mother Machine	untreated	1.71996	1.09912
Mother Machine	untreated	1.72096	1.34375
Mother Machine	untreated	1.72196	1.15959
Mother Machine	untreated	1.72296	1.62012
Mother Machine	untreated	1.72396	1.68394
Mother Machine	untreated	1.72496	1.74147
Mother Machine	untreated	1.72596	1.36798
Mother Machine	untreated	1.72696	1.54845
Mother Machine	untreated	1.72796	1.14695
Mother Machine	untreated	1.72896	1.40762
Mother Machine	untreated	1.72996	1.43121
Mother Machine	untreated	1.73096	1.61199
Mother Machine	untreated	1.73196	2.01801
Mother Machine	untreated	1.73296	1.80334
Mother Machine	untreated	1.73396	1.2953
Mother Machine	untreated	1.73496	1.68166
Mother Machine	untreated	1.73596	1.5431
Mother Machine	untreated	1.73696	1.42264
Mother Machine	untreated	1.73796	2.00132
Mother Machine	untreated	1.73896	1.43275
Mother Machine	untreated	1.73996	1.48877
Mother Machine	untreated	1.74096	1.75277
Mother Machine	untreated	1.74196	1.42127
Mother Machine	untreated	1.74296	1.88392
Mother Machine	untreated	1.74396	1.30101
Mother Machine	untreated	1.74496	1.34697
Mother Machine	untreated	1.74596	1.36492
Mother Machine	untreated	1.74696	1.22727
Mother Machine	untreated	1.74796	1.62812
Mother Machine	untreated	1.74896	1.93181
Mother Machine	untreated	1.74996	1.86876
Mother Machine	untreated	1.75096	1.43538
Mother Machine	untreated	1.75196	1.73092
Mother Machine	untreated	1.75296	1.73939
Mother Machine	untreated	1.75396	1.54629
Mother Machine	untreated	1.75496	1.86098
Mother Machine	untreated	1.75596	1.4779
Mother Machine	untreated	1.75696	1.36578
Mother Machine	untreated	1.75796	1.7265
Mother Machine	untreated	1.75896	1.54947
Mother Machine	untreated	1.75996	1.2327
Mother Machine	untreated	1.76096	1.16931
Mother Machine	untreated	1.76196	1.61959
Mother Machine	untreated	1.76296	1.5917
Mother Machine	untreated	1.76396	1.30745
Mother Machine	untreated	1.76496	1.67802
Mother Machine	untreated	1.76596	1.73497
Mother Machine	untreated	1.76696	1.67423
Mother Machine	untreated	1.76796	1.62629
Mother Machine	untreated	1.76896	1.62502
Mother Machine	untreated	1.76996	1.61746
Mother Machine	untreated	1.77096	1.60447
Mother Machine	untreated	1.77196	1.62736
Mother Machine	untreated	1.77296	1.42453
Mother Machine	untreated	1.77396	1.17659
Mother Machine	untreated	1.77496	1.41136
Mother Machine	untreated	1.77596	1.54322
Mother Machine	untreated	1.77696	1.35631
Mother Machine	untreated	1.77796	1.80623
Mother Machine	untreated	1.77896	1.59862
Mother Machine	untreated	1.77996	1.56373
Mother Machine	untreated	1.78096	1.54041
Mother Machine	untreated	1.78196	1.48679
Mother Machine	untreated	1.78296	1.68945
Mother Machine	untreated	1.78396	1.48133
Mother Machine	untreated	1.78496	1.56584
Mother Machine	untreated	1.78596	1.09693
Mother Machine	untreated	1.78696	1.28804
Mother Machine	untreated	1.78796	1.81346
Mother Machine	untreated	1.78896	1.42651
Mother Machine	untreated	1.78996	1.289
Mother Machine	untreated	1.79096	1.74768
Mother Machine	untreated	1.79196	1.61173
Mother Machine	untreated	1.79296	1.42723
Mother Machine	untreated	1.79396	1.33346
Mother Machine	untreated	1.79496	1.66741
Mother Machine	untreated	1.79596	1.30409
Mother Machine	untreated	1.79696	1.79704
Mother Machine	untreated	1.79796	1.98784
Mother Machine	untreated	1.79896	1.87012
Mother Machine	untreated	1.79996	1.88358
Mother Machine	untreated	1.80096	1.62619
Mother Machine	untreated	1.80196	1.60045
Mother Machine	untreated	1.80296	1.28115
Mother Machine	untreated	1.80396	1.15781
Mother Machine	untreated	1.80496	1.35752
Mother Machine	untreated	1.80596	1.40944
Mother Machine	untreated	1.80696	1.74654
Mother Machine	untreated	1.80796	1.55465
Mother Machine	untreated	1.80896	1.99944
Mother Machine	untreated	1.80996	2.12481
Mother Machine	untreated	1.81096	1.86194
Mother Machine	untreated	1.81196	1.37185
Mother Machine	untreated	1.81296	1.67164
Mother Machine	untreated	1.81396	1.54694
Mother Machine	untreated	1.81496	1.50796
Mother Machine	untreated	1.81596	1.47641
Mother Machine	untreated	1.81696	1.861
Mother Machine	untreated	1.81796	1.1573
Mother Machine	untreated	1.81896	1.40299
Mother Machine	untreated	1.81996	1.55665
Mother Machine	untreated	1.82096	1.87779
Mother Machine	untreated	1.82196	1.49523
Mother Machine	untreated	1.82296	1.41952
Mother Machine	untreated	1.82396	1.69488
Mother Machine	untreated	1.82496	1.80304
Mother Machine	untreated	1.82596	1.35676
Mother Machine	untreated	1.82696	1.48638
Mother Machine	untreated	1.82796	1.66045
Mother Machine	untreated	1.82896	1.42881
Mother Machine	untreated	1.82996	1.22537
Mother Machine	untreated	1.83096	1.37162
Mother Machine	untreated	1.83196	1.36001
Mother Machine	untreated	1.83296	1.42645
Mother Machine	untreated	1.83396	1.35655
Mother Machine	untreated	1.83496	1.88538
Mother Machine	untreated	1.83596	1.16554
Mother Machine	untreated	1.83696	1.23394
Mother Machine	untreated	1.83796	1.35895
Mother Machine	untreated	1.83896	1.82206
Mother Machine	untreated	1.83996	1.54387
Mother Machine	untreated	1.84096	1.49596
Mother Machine	untreated	1.84196	1.59564
Mother Machine	untreated	1.84296	1.61372
Mother Machine	untreated	1.84396	1.43344
Mother Machine	untreated	1.84496	1.30716
Mother Machine	untreated	1.84596	1.48761
Mother Machine	untreated	1.84696	1.36509
Mother Machine	untreated	1.84796	1.35749
Mother Machine	untreated	1.84896	1.29605
Mother Machine	untreated	1.84996	1.16532
Mother Machine	untreated	1.85096	1.36151
Mother Machine	untreated	1.85196	1.36926
Mother Machine	untreated	1.85296	1.29792
Mother Machine	untreated	1.85396	1.62664
Mother Machine	untreated	1.85496	1.33667
Mother Machine	untreated	1.85596	0.974847
Mother Machine	untreated	1.85696	1.29049
Mother Machine	untreated	1.85796	1.48788
Mother Machine	untreated	1.85896	1.2972
Mother Machine	untreated	1.85996	1.41571
Mother Machine	untreated	1.86096	2.01779
Mother Machine	untreated	1.86196	1.47596
Mother Machine	untreated	1.86296	1.16857
Mother Machine	untreated	1.86396	0.964108
Mother Machine	untreated	1.86496	0.956562
Mother Machine	untreated	1.86596	1.46948
Mother Machine	untreated	1.86696	1.46992
Mother Machine	untreated	1.86796	1.7262
Mother Machine	untreated	1.86896	1.65722
Mother Machine	untreated	1.86996	1.13453
Mother Machine	untreated	1.87096	1.4393
Mother Machine	untreated	1.87196	1.16128
Mother Machine	untreated	1.87296	1.29274
Mother Machine	untreated	1.87396	1.21691
Mother Machine	untreated	1.87496	0.976773
Mother Machine	untreated	1.87596	1.40782
Mother Machine	untreated	1.87696	1.81229
Mother Machine	untreated	1.87796	1.42384
Mother Machine	untreated	1.87896	1.55786
Mother Machine	untreated	1.87996	1.36715
Mother Machine	untreated	1.88096	1.29776
Mother Machine	untreated	1.88196	1.28618
Mother Machine	untreated	1.88296	1.61404
Mother Machine	untreated	1.88396	1.4863
Mother Machine	untreated	1.88496	1.35584
Mother Machine	untreated	1.88596	1.04092
Mother Machine	untreated	1.88696	1.87927
Mother Machine	untreated	1.88796	1.43082
Mother Machine	untreated	1.88896	1.44076
Mother Machine	untreated	1.88996	1.74473
Mother Machine	untreated	1.89096	1.80066
Mother Machine	untreated	1.89196	1.36136
Mother Machine	untreated	1.89296	1.48438
Mother Machine	untreated	1.89396	1.6921
Mother Machine	untreated	1.89496	1.50213
Mother Machine	untreated	1.89596	1.53753
Mother Machine	untreated	1.89696	1.56341
Mother Machine	untreated	1.89796	1.95392
Mother Machine	untreated	1.89896	1.74536
Mother Machine	untreated	1.89996	2.13781
Mother Machine	untreated	1.90096	1.3503
Mother Machine	untreated	1.90196	1.6066
Mother Machine	untreated	1.90296	1.8574
Mother Machine	untreated	1.90396	1.28592
Mother Machine	untreated	1.90496	1.04303
Mother Machine	untreated	1.90596	1.6921
Mother Machine	untreated	1.90696	1.50213
Mother Machine	untreated	1.90796	1.53753
Mother Machine	untreated	1.90896	1.56341
Mother Machine	untreated	1.90996	1.95392
Mother Machine	untreated	1.91096	1.74536
Mother Machine	untreated	1.91196	2.13781
Mother Machine	untreated	1.91296	1.3503
Mother Machine	untreated	1.91396	1.6066
Mother Machine	untreated	1.91496	1.8574
Mother Machine	untreated	1.91596	1.28592
Mother Machine	untreated	1.91696	1.04303
Mother Machine	untreated	1.91796	1.68662
Mother Machine	untreated	1.91896	1.68048
Mother Machine	untreated	1.91996	1.6711
Mother Machine	untreated	1.92096	1.49028
Mother Machine	untreated	1.92196	1.16541
Mother Machine	untreated	1.92296	1.94514
Mother Machine	untreated	1.92396	1.41425
Mother Machine	untreated	1.92496	1.29677
Mother Machine	untreated	1.92596	1.69011
Mother Machine	untreated	1.92696	1.4313
Mother Machine	untreated	1.92796	1.35645
Mother Machine	untreated	1.92896	1.68251
Mother Machine	untreated	1.92996	1.75552
Mother Machine	untreated	1.93096	1.62174
Mother Machine	untreated	1.93196	1.6895
Mother Machine	untreated	1.93296	1.42641
Mother Machine	untreated	1.93396	1.34394
Mother Machine	untreated	1.93496	1.68813
Mother Machine	untreated	1.93596	1.9937
Mother Machine	untreated	1.93696	1.93271
Mother Machine	untreated	1.93796	1.87175
Mother Machine	untreated	1.93896	1.6289
Mother Machine	untreated	1.93996	1.93926
Mother Machine	untreated	1.94096	1.62206
Mother Machine	untreated	1.94196	1.28816
Mother Machine	untreated	1.94296	1.4264
Mother Machine	untreated	1.94396	1.49826
Mother Machine	untreated	1.94496	1.60563
Mother Machine	untreated	1.94596	1.95362
Mother Machine	untreated	1.94696	1.61987
Mother Machine	untreated	1.94796	1.49942
Mother Machine	untreated	1.94896	1.67622
Mother Machine	untreated	1.94996	1.86165
Mother Machine	untreated	1.95096	1.93938
Mother Machine	untreated	1.95196	1.68817
Mother Machine	untreated	1.95296	1.41492
Mother Machine	untreated	1.95396	1.60872
Mother Machine	untreated	1.95496	1.55007
Mother Machine	untreated	1.95596	1.59352
Mother Machine	untreated	1.95696	1.67534
Mother Machine	untreated	1.95796	1.61778
Mother Machine	untreated	1.95896	1.87126
Mother Machine	untreated	1.95996	1.69295
Mother Machine	untreated	1.96096	1.61208
Mother Machine	untreated	1.96196	1.74959
Mother Machine	untreated	1.96296	1.54112
Mother Machine	untreated	1.96396	1.43729
Mother Machine	untreated	1.96496	1.43377
Mother Machine	untreated	1.96596	1.09733
Mother Machine	untreated	1.96696	1.61718
Mother Machine	untreated	1.96796	1.94734
Mother Machine	untreated	1.96896	1.94662
Mother Machine	untreated	1.96996	1.73494
Mother Machine	untreated	1.97096	1.60692
Mother Machine	untreated	1.97196	1.49023
Mother Machine	untreated	1.97296	1.22941
Mother Machine	untreated	1.97396	1.55902
Mother Machine	untreated	1.97496	1.55329
Mother Machine	untreated	1.97596	2.38329
Mother Machine	untreated	1.97696	1.41323
Mother Machine	untreated	1.97796	1.22045
Mother Machine	untreated	1.97896	1.79898
Mother Machine	untreated	1.97996	1.42506
Mother Machine	untreated	1.98096	1.18084
Mother Machine	untreated	1.98196	1.61658
Mother Machine	untreated	1.98296	1.30766
Mother Machine	untreated	1.98396	1.427
Mother Machine	untreated	1.98496	1.1084
Mother Machine	untreated	1.98596	1.17031
Mother Machine	untreated	1.98696	1.62064
Mother Machine	untreated	1.98796	1.49337
Mother Machine	untreated	1.98896	1.28853
Mother Machine	untreated	1.98996	1.6107
Mother Machine	untreated	1.99096	1.15168
Mother Machine	untreated	1.99196	1.28879
Mother Machine	untreated	1.99296	1.55879
Mother Machine	untreated	1.99396	1.15738
Mother Machine	untreated	1.99496	1.29612
Mother Machine	untreated	1.99596	1.08957
Mother Machine	untreated	1.99696	0.917171
Mother Machine	untreated	1.99796	1.18162
Mother Machine	untreated	1.99896	1.29722
Mother Machine	untreated	1.99996	1.37131
Mother Machine	untreated	2.00096	1.42518
Mother Machine	untreated	2.00196	1.43687
Mother Machine	untreated	2.00296	1.43706
Mother Machine	untreated	2.00396	1.37629
Mother Machine	untreated	2.00496	1.40497
Mother Machine	untreated	2.00596	1.47919
Mother Machine	untreated	2.00696	1.2958
Mother Machine	untreated	2.00796	1.37599
Mother Machine	untreated	2.00896	1.29082
Mother Machine	untreated	2.00996	1.16832
Mother Machine	untreated	2.01096	1.29097
Mother Machine	untreated	2.01196	1.41003
Mother Machine	untreated	2.01296	1.796
Mother Machine	untreated	2.01396	1.69821
Mother Machine	untreated	2.01496	1.35806
Mother Machine	untreated	2.01596	1.2143
Mother Machine	untreated	2.01696	1.35662
Mother Machine	untreated	2.01796	1.67349
Mother Machine	untreated	2.01896	1.67856
Mother Machine	untreated	2.01996	1.49041
Mother Machine	untreated	2.02096	1.61183
Mother Machine	untreated	2.02196	1.92327
Mother Machine	untreated	2.02296	1.79654
Mother Machine	untreated	2.02396	1.1038
Mother Machine	untreated	2.02496	1.54062
Mother Machine	untreated	2.02596	1.30657
Mother Machine	untreated	2.02696	1.22534
Mother Machine	untreated	2.02796	1.48113
Mother Machine	untreated	2.02896	1.55728
Mother Machine	untreated	2.02996	1.54759
Mother Machine	untreated	2.03096	1.30272
Mother Machine	untreated	2.03196	1.20719
Mother Machine	untreated	2.03296	1.30453

## Sheet: Fig3B
condition	A22 concentration	Average D period (min)	Slope division adder
Mother Machine	0	26.1652	-0.0139243
Mother Machine	0	19.3192	0.0192666
Mother Machine	0	19.0609	-0.142375
Mother Machine	0.25	34.9277	-0.0619296
Mother Machine	0.25	20.6622	0.0723524
Mother Machine	0.25	28.3878	-0.166515
Mother Machine	0.25	35.9695	-0.274056
Mother Machine	0.5	38.2703	-0.281702
Mother Machine	0.5	70.1199	-0.570746
Mother Machine	0.5	41.4783	-0.000572138
Mother Machine	0.5	37.7647	-0.111954
Mother Machine	1	88.6346	-0.285739
Mother Machine	1	74.0305	-0.356094
Mother Machine	1	44.2308	-0.127121

## Sheet: Fig3C
condition	A22 concentration	Initiation length per ori (norm.)	Added length between initiations (norm.)		A22 concentration	Initiation length per ori (norm.)	Added length between initiations (norm.)
Mother Machine	untreated	1.04528	1.88549		1 ug/mL	0.786567	0.663765
Mother Machine	untreated	1.04628	1.89309		1 ug/mL	0.786567	0.663765
Mother Machine	untreated	1.04728	1.83304		1 ug/mL	0.916553	0.462176
Mother Machine	untreated	1.04828	1.43552		1 ug/mL	0.916553	0.462176
Mother Machine	untreated	1.04928	1.63455		1 ug/mL	0.654453	0.849427
Mother Machine	untreated	1.05028	1.50373		1 ug/mL	0.689364	1.59347
Mother Machine	untreated	1.05128	1.59991		1 ug/mL	0.689364	1.59347
Mother Machine	untreated	1.05228	2.09435		1 ug/mL	0.55866	1.01011
Mother Machine	untreated	1.05328	1.31276		1 ug/mL	0.722144	2.15962
Mother Machine	untreated	1.05428	1.89778		1 ug/mL	0.820359	0.747238
Mother Machine	untreated	1.05528	1.56615		1 ug/mL	0.820359	0.683561
Mother Machine	untreated	1.05628	1.70448		1 ug/mL	0.820359	0.683561
Mother Machine	untreated	1.05728	1.64587		1 ug/mL	0.783799	2.09966
Mother Machine	untreated	1.05828	1.63611		1 ug/mL	0.75196	0.557184
Mother Machine	untreated	1.05928	1.6379		1 ug/mL	0.75196	0.557184
Mother Machine	untreated	1.06028	2.276		1 ug/mL	0.75196	0.620663
Mother Machine	untreated	1.06128	1.50905		1 ug/mL	0.654572	0.657012
Mother Machine	untreated	1.06228	1.7229		1 ug/mL	0.690491	0.555834
Mother Machine	untreated	1.06328	2.09257		1 ug/mL	0.654572	0.725535
Mother Machine	untreated	1.06428	1.2831		1 ug/mL	0.752806	0.556084
Mother Machine	untreated	1.06528	1.62403		1 ug/mL	0.752806	0.556084
Mother Machine	untreated	1.06628	1.90065		1 ug/mL	0.654445	1.38172
Mother Machine	untreated	1.06728	1.37987		1 ug/mL	0.850595	0.857038
Mother Machine	untreated	1.06828	2.18905		1 ug/mL	0.908965	0.985894
Mother Machine	untreated	1.06928	1.80841		1 ug/mL	0.850595	0.780993
Mother Machine	untreated	1.07028	1.38336		1 ug/mL	0.853816	1.03877
Mother Machine	untreated	1.07128	1.63377		1 ug/mL	0.786259	1.63399
Mother Machine	untreated	1.07228	2.03604		1 ug/mL	0.881756	0.94411
Mother Machine	untreated	1.07328	2.2293		1 ug/mL	0.912933	0.91907
Mother Machine	untreated	1.07428	1.75959		1 ug/mL	0.753485	1.07654
Mother Machine	untreated	1.07528	1.62381		1 ug/mL	0.753485	1.07654
Mother Machine	untreated	1.07628	1.32001		1 ug/mL	0.915012	0.91084
Mother Machine	untreated	1.07728	2.0846		1 ug/mL	0.915012	0.91084
Mother Machine	untreated	1.07828	1.43059		1 ug/mL	0.915012	0.851753
Mother Machine	untreated	1.07928	2.28808		1 ug/mL	0.883418	0.944368
Mother Machine	untreated	1.08028	1.70595		1 ug/mL	0.913893	0.655714
Mother Machine	untreated	1.08128	2.02322		1 ug/mL	0.913893	0.655714
Mother Machine	untreated	1.08228	1.23309		1 ug/mL	0.688763	0.619132
Mother Machine	untreated	1.08328	1.57344		1 ug/mL	0.688763	0.818303
Mother Machine	untreated	1.08428	1.89363		1 ug/mL	0.819258	0.755464
Mother Machine	untreated	1.08528	1.44713		1 ug/mL	0.655803	0.587401
Mother Machine	untreated	1.08628	1.73035		1 ug/mL	0.723273	0.788626
Mother Machine	untreated	1.08728	1.73035		1 ug/mL	0.688218	0.690036
Mother Machine	untreated	1.08828	1.56951		1 ug/mL	0.657003	0.780511
Mother Machine	untreated	1.08928	1.82986		1 ug/mL	0.718757	0.723321
Mother Machine	untreated	1.09028	1.82951		1 ug/mL	0.785515	0.787597
Mother Machine	untreated	1.09128	1.82965		1 ug/mL	0.752431	0.623937
Mother Machine	untreated	1.09228	1.98727		1 ug/mL	0.752431	0.623937
Mother Machine	untreated	1.09328	1.82114		1 ug/mL	0.750986	0.625513
Mother Machine	untreated	1.09428	2.61335		1 ug/mL	0.688184	0.750193
Mother Machine	untreated	1.09528	1.83154		1 ug/mL	0.727065	0.713887
Mother Machine	untreated	1.09628	1.50231		1 ug/mL	0.727065	0.649857
Mother Machine	untreated	1.09728	2.28072		1 ug/mL	0.721303	0.590867
Mother Machine	untreated	1.09828	1.57859		1 ug/mL	0.688461	0.686335
Mother Machine	untreated	1.09928	1.96243		1 ug/mL	0.656085	0.71561
Mother Machine	untreated	1.10028	1.70666		1 ug/mL	0.785457	0.799276
Mother Machine	untreated	1.10128	1.76869		1 ug/mL	0.785457	0.524131
Mother Machine	untreated	1.10228	1.90184		1 ug/mL	0.785457	0.524131
Mother Machine	untreated	1.10328	1.82984		1 ug/mL	0.882764	0.42426
Mother Machine	untreated	1.10428	1.4391		1 ug/mL	0.558201	0.946724
Mother Machine	untreated	1.10528	2.15738		1 ug/mL	0.558201	0.946724
Mother Machine	untreated	1.10628	2.02925		1 ug/mL	0.688131	0.493206
Mother Machine	untreated	1.10728	1.31508		1 ug/mL	0.688131	0.493206
Mother Machine	untreated	1.10828	1.43739		1 ug/mL	0.654277	0.52292
Mother Machine	untreated	1.10928	1.70566		1 ug/mL	0.786735	0.718611
Mother Machine	untreated	1.11028	2.02256		1 ug/mL	0.821036	1.1545
Mother Machine	untreated	1.11128	1.78182		1 ug/mL	0.783885	0.656259
Mother Machine	untreated	1.11228	2.15616		1 ug/mL	0.81812	0.359251
Mother Machine	untreated	1.11328	1.50054		1 ug/mL	0.850352	0.786344
Mother Machine	untreated	1.11428	1.56848		1 ug/mL	1.01279	0.885658
Mother Machine	untreated	1.11528	1.56848		1 ug/mL	0.949226	0.81346
Mother Machine	untreated	1.11628	1.18314		1 ug/mL	0.986298	0.516468
Mother Machine	untreated	1.11728	1.64155		1 ug/mL	0.881996	1.74788
Mother Machine	untreated	1.11828	1.89216		1 ug/mL	0.816868	0.558981
Mother Machine	untreated	1.11928	1.75542		1 ug/mL	0.687924	0.887421
Mother Machine	untreated	1.12028	1.70137		1 ug/mL	0.654073	0.917126
Mother Machine	untreated	1.12128	1.37062		1 ug/mL	0.688592	0.880325
Mother Machine	untreated	1.12228	2.36089		1 ug/mL	0.787032	0.520553
Mother Machine	untreated	1.12328	1.71238		1 ug/mL	0.653793	0.72522
Mother Machine	untreated	1.12428	1.31298		1 ug/mL	0.653793	0.72522
Mother Machine	untreated	1.12528	1.72183		1 ug/mL	0.983166	0.589548
Mother Machine	untreated	1.12628	1.89904		1 ug/mL	0.555826	0.820366
Mother Machine	untreated	1.12728	1.43526		1 ug/mL	0.817784	0.689544
Mother Machine	untreated	1.12828	1.82234		1 ug/mL	0.555826	0.820366
Mother Machine	untreated	1.12928	1.36582		1 ug/mL	0.817784	0.689544
Mother Machine	untreated	1.13028	1.889		1 ug/mL	0.719795	0.595598
Mother Machine	untreated	1.13128	1.76959		1 ug/mL	0.719795	0.716772
Mother Machine	untreated	1.13228	1.77057		1 ug/mL	0.883033	0.561866
Mother Machine	untreated	1.13328	1.76526		1 ug/mL	0.654926	0.589432
Mother Machine	untreated	1.13428	2.04455		1 ug/mL	0.622179	0.821198
Mother Machine	untreated	1.13528	0.977681		1 ug/mL	0.754271	0.818652
Mother Machine	untreated	1.13628	1.69805		1 ug/mL	0.847991	0.66212
Mother Machine	untreated	1.13728	1.889		1 ug/mL	0.847991	0.66212
Mother Machine	untreated	1.13828	1.76959		1 ug/mL	0.755056	0.619672
Mother Machine	untreated	1.13928	1.77057		1 ug/mL	0.819745	0.878709
Mother Machine	untreated	1.14028	1.76526		1 ug/mL	0.819745	0.878709
Mother Machine	untreated	1.14128	2.04455		1 ug/mL	0.819745	0.818521
Mother Machine	untreated	1.14228	0.977681		1 ug/mL	0.819745	0.818521
Mother Machine	untreated	1.14328	1.69805		1 ug/mL	0.819133	0.950361
Mother Machine	untreated	1.14428	1.70354		1 ug/mL	0.819133	0.950361
Mother Machine	untreated	1.14528	1.4566		1 ug/mL	0.819133	0.49312
Mother Machine	untreated	1.14628	1.95141		1 ug/mL	0.819271	0.688176
Mother Machine	untreated	1.14728	1.55764		1 ug/mL	0.753724	0.815629
Mother Machine	untreated	1.14828	1.55764		1 ug/mL	0.816479	0.685279
Mother Machine	untreated	1.14928	1.22377		1 ug/mL	0.754826	0.819207
Mother Machine	untreated	1.15028	1.47539		1 ug/mL	0.850754	0.724072
Mother Machine	untreated	1.15128	1.21856		1 ug/mL	0.589215	0.852605
Mother Machine	untreated	1.15228	1.57658		1 ug/mL	0.72091	0.590178
Mother Machine	untreated	1.15328	1.75889		1 ug/mL	0.752879	0.683919
Mother Machine	untreated	1.15428	2.03443		1 ug/mL	0.885317	0.690513
Mother Machine	untreated	1.15528	1.38637		1 ug/mL	0.820949	0.750147
Mother Machine	untreated	1.15628	1.62911		1 ug/mL	0.752235	0.753407
Mother Machine	untreated	1.15728	1.63259		1 ug/mL	0.622697	0.687374
Mother Machine	untreated	1.15828	2.29142		1 ug/mL	0.752821	0.622381
Mother Machine	untreated	1.15928	2.08717		1 ug/mL	0.687601	0.94869
Mother Machine	untreated	1.16028	1.9632		1 ug/mL	0.687601	0.94869
Mother Machine	untreated	1.16128	1.71871		1 ug/mL	0.820379	0.819145
Mother Machine	untreated	1.16228	1.83096		1 ug/mL	0.820379	0.61756
Mother Machine	untreated	1.16328	1.83726		1 ug/mL	0.718969	0.722365
Mother Machine	untreated	1.16428	1.44288		1 ug/mL	1.07984	1.197
Mother Machine	untreated	1.16528	2.22388		1 ug/mL	1.07984	1.197
Mother Machine	untreated	1.16628	2.15528		1 ug/mL	1.13842	0.81672
Mother Machine	untreated	1.16728	1.82987		1 ug/mL	0.785609	0.6538
Mother Machine	untreated	1.16828	1.3203		1 ug/mL	0.785609	0.783429
Mother Machine	untreated	1.16928	1.68909		1 ug/mL	0.949938	0.616799
Mother Machine	untreated	1.17028	1.51272		1 ug/mL	0.784519	0.663304
Mother Machine	untreated	1.17128	1.90174		1 ug/mL	0.784519	0.663304
Mother Machine	untreated	1.17228	1.231		1 ug/mL	0.917558	0.589947
Mother Machine	untreated	1.17328	1.62252		1 ug/mL	0.723912	0.653744
Mother Machine	untreated	1.17428	1.76696		1 ug/mL	0.723912	0.714555
Mother Machine	untreated	1.17528	1.84675		1 ug/mL	0.785609	0.6538
Mother Machine	untreated	1.17628	1.99664		1 ug/mL	0.785609	0.783429
Mother Machine	untreated	1.17728	1.75899		1 ug/mL	0.949938	0.616799
Mother Machine	untreated	1.17828	2.33839		1 ug/mL	0.784519	0.663304
Mother Machine	untreated	1.17928	1.18679		1 ug/mL	0.784519	0.663304
Mother Machine	untreated	1.18028	1.44744		1 ug/mL	0.917558	0.589947
Mother Machine	untreated	1.18128	1.69012		1 ug/mL	0.723912	0.653744
Mother Machine	untreated	1.18228	1.31041		1 ug/mL	0.723912	0.714555
Mother Machine	untreated	1.18328	1.56928		1 ug/mL	0.75717	0.748208
Mother Machine	untreated	1.18428	1.25255		1 ug/mL	0.720051	0.847998
Mother Machine	untreated	1.18528	1.63838		1 ug/mL	0.978719	0.788359
Mother Machine	untreated	1.18628	1.54414		1 ug/mL	0.849975	0.596803
Mother Machine	untreated	1.18728	1.95609		1 ug/mL	0.849975	0.596803
Mother Machine	untreated	1.18828	1.88818		1 ug/mL	0.689883	0.880883
Mother Machine	untreated	1.18928	1.56558		1 ug/mL	0.819259	0.624723
Mother Machine	untreated	1.19028	1.64448		1 ug/mL	0.819259	0.624723
Mother Machine	untreated	1.19128	1.89541		1 ug/mL	0.721991	0.726643
Mother Machine	untreated	1.19228	1.62951		1 ug/mL	0.721991	0.847768
Mother Machine	untreated	1.19328	1.64671		1 ug/mL	0.753578	0.621638
Mother Machine	untreated	1.19428	1.38157		1 ug/mL	0.687608	0.559703
Mother Machine	untreated	1.19528	2.02541		1 ug/mL	0.753578	0.621638
Mother Machine	untreated	1.19628	1.63505		1 ug/mL	0.687608	0.559703
Mother Machine	untreated	1.19728	1.57835		1 ug/mL	0.755685	0.944966
Mother Machine	untreated	1.19828	1.57615		1 ug/mL	0.755685	0.815452
Mother Machine	untreated	1.19928	1.70424		1 ug/mL	0.785568	0.589269
Mother Machine	untreated	1.20028	1.56655		1 ug/mL	0.687946	0.880542
Mother Machine	untreated	1.20128	2.09928		1 ug/mL	0.687946	0.754245
Mother Machine	untreated	1.20228	1.29918		1 ug/mL	0.687418	0.624164
Mother Machine	untreated	1.20328	1.90554		1 ug/mL	0.687418	0.624164
Mother Machine	untreated	1.20428	1.76573		1 ug/mL	0.721096	0.6531
Mother Machine	untreated	1.20528	1.8279		1 ug/mL	0.687346	0.685884
Mother Machine	untreated	1.20628	1.76765		1 ug/mL	0.686615	0.756122
Mother Machine	untreated	1.20728	1.5066		1 ug/mL	0.686615	0.756122
Mother Machine	untreated	1.20828	1.61371		1 ug/mL	0.816621	0.561177
Mother Machine	untreated	1.20928	1.97941		1 ug/mL	0.816621	0.624362
Mother Machine	untreated	1.21028	1.96881		1 ug/mL	0.816621	0.624362
Mother Machine	untreated	1.21128	1.43154		1 ug/mL	0.688899	0.687285
Mother Machine	untreated	1.21228	1.56582		1 ug/mL	0.720492	0.659802
Mother Machine	untreated	1.21328	2.02054		1 ug/mL	0.690147	0.620257
Mother Machine	untreated	1.21428	2.03304		1 ug/mL	0.688092	0.689599
Mother Machine	untreated	1.21528	1.63599		1 ug/mL	0.752402	0.751559
Mother Machine	untreated	1.21628	1.37008		1 ug/mL	0.752402	0.751559
Mother Machine	untreated	1.21728	1.67904		1 ug/mL	0.75198	0.821366
Mother Machine	untreated	1.21828	1.62869		1 ug/mL	0.818077	0.821725
Mother Machine	untreated	1.21928	1.64701		1 ug/mL	0.818077	0.81625
Mother Machine	untreated	1.22028	2.09932		1 ug/mL	0.819901	0.75331
Mother Machine	untreated	1.22128	1.95813		1 ug/mL	0.819901	0.75331
Mother Machine	untreated	1.22228	2.14911		1 ug/mL	0.817164	1.07867
Mother Machine	untreated	1.22328	1.89682		1 ug/mL	0.817164	1.07867
Mother Machine	untreated	1.22428	1.44491		1 ug/mL	0.947917	0.492332
Mother Machine	untreated	1.22528	1.96003		1 ug/mL	0.720603	0.784246
Mother Machine	untreated	1.22628	2.54628		1 ug/mL	0.783682	0.658069
Mother Machine	untreated	1.22728	2.22783		1 ug/mL	1.04502	1.225
Mother Machine	untreated	1.22828	1.95558		1 ug/mL	0.689161	0.616629
Mother Machine	untreated	1.22928	2.10692		1 ug/mL	0.719699	0.723873
Mother Machine	untreated	1.23028	1.70017		1 ug/mL	0.719699	0.723873
Mother Machine	untreated	1.23128	1.88959		1 ug/mL	0.719699	0.65679
Mother Machine	untreated	1.23228	1.74996		1 ug/mL	0.652895	0.656265
Mother Machine	untreated	1.23328	1.30879		1 ug/mL	0.689161	0.616629
Mother Machine	untreated	1.23428	1.43473		1 ug/mL	0.719699	0.723873
Mother Machine	untreated	1.23528	1.97717		1 ug/mL	0.719699	0.723873
Mother Machine	untreated	1.23628	1.89045		1 ug/mL	0.719699	0.65679
Mother Machine	untreated	1.23728	1.90359		1 ug/mL	0.652895	0.656265
Mother Machine	untreated	1.23828	1.63294		1 ug/mL	0.720179	0.9791
Mother Machine	untreated	1.23928	2.164		1 ug/mL	0.75457	0.745324
Mother Machine	untreated	1.24028	2.02929		1 ug/mL	0.84964	0.655485
Mother Machine	untreated	1.24128	1.63578		1 ug/mL	0.657479	0.78206
Mother Machine	untreated	1.24228	1.96675		1 ug/mL	0.817776	0.621628
Mother Machine	untreated	1.24328	1.63748		1 ug/mL	0.686328	0.624169
Mother Machine	untreated	1.24428	1.69727		1 ug/mL	0.85285	0.592313
Mother Machine	untreated	1.24528	1.44051		1 ug/mL	0.85285	0.592313
Mother Machine	untreated	1.24628	2.78464		1 ug/mL	0.722581	1.11371
Mother Machine	untreated	1.24728	1.70342		1 ug/mL	0.722581	1.11371
Mother Machine	untreated	1.24828	1.84139		1 ug/mL	0.918146	0.652114
Mother Machine	untreated	1.24928	1.70006		1 ug/mL	0.946251	0.56628
Mother Machine	untreated	1.25028	1.50113		1 ug/mL	0.756266	0.821067
Mother Machine	untreated	1.25128	1.24181		1 ug/mL	0.756266	0.821067
Mother Machine	untreated	1.25228	1.76612		1 ug/mL	0.75328	0.691063
Mother Machine	untreated	1.25328	1.38225		1 ug/mL	0.75328	0.691063
Mother Machine	untreated	1.25428	1.37621		1 ug/mL	0.722172	0.786515
Mother Machine	untreated	1.25528	1.57382		1 ug/mL	0.722172	0.5926
Mother Machine	untreated	1.25628	1.65612		1 ug/mL	0.722172	0.5926
Mother Machine	untreated	1.25728	1.71998		1 ug/mL	0.946251	0.56628
Mother Machine	untreated	1.25828	1.71998		1 ug/mL	0.756266	0.821067
Mother Machine	untreated	1.25928	1.65213		1 ug/mL	0.756266	0.821067
Mother Machine	untreated	1.26028	1.80126		1 ug/mL	0.75328	0.691063
Mother Machine	untreated	1.26128	1.66868		1 ug/mL	0.75328	0.691063
Mother Machine	untreated	1.26228	1.57104		1 ug/mL	0.722172	0.786515
Mother Machine	untreated	1.26328	1.94835		1 ug/mL	0.722172	0.5926
Mother Machine	untreated	1.26428	1.04134		1 ug/mL	0.722172	0.5926
Mother Machine	untreated	1.26528	1.7548		1 ug/mL	0.719922	0.788037
Mother Machine	untreated	1.26628	2.23355		1 ug/mL	0.719922	0.788037
Mother Machine	untreated	1.26728	2.10037		1 ug/mL	0.75398	0.6244
Mother Machine	untreated	1.26828	1.69204		1 ug/mL	0.75398	0.882873
Mother Machine	untreated	1.26928	1.96477		1 ug/mL	0.885308	0.748363
Mother Machine	untreated	1.27028	1.30771		1 ug/mL	0.656791	0.591662
Mother Machine	untreated	1.27128	1.43717		1 ug/mL	0.656791	0.591662
Mother Machine	untreated	1.27228	2.07431		1 ug/mL	0.690432	0.555488
Mother Machine	untreated	1.27328	1.4435		1 ug/mL	0.690432	0.557732
Mother Machine	untreated	1.27428	1.43658		1 ug/mL	0.718845	0.718627
Mother Machine	untreated	1.27528	1.83066		1 ug/mL	0.719708	0.46388
Mother Machine	untreated	1.27628	2.3473		1 ug/mL	0.882638	0.622949
Mother Machine	untreated	1.27728	2.22124		1 ug/mL	0.947261	0.755339
Mother Machine	untreated	1.27828	1.30685		1 ug/mL	0.752793	0.754249
Mother Machine	untreated	1.27928	1.90995		1 ug/mL	0.752793	0.754249
Mother Machine	untreated	1.28028	2.40836		1 ug/mL	0.753521	0.559912
Mother Machine	untreated	1.28128	2.02853		1 ug/mL	0.753521	0.559912
Mother Machine	untreated	1.28228	2.08408		1 ug/mL	0.753521	0.755749
Mother Machine	untreated	1.28328	1.9064		1 ug/mL	0.656215	0.783138
Mother Machine	untreated	1.28428	2.03131		1 ug/mL	0.719676	0.852094
Mother Machine	untreated	1.28528	1.96729		1 ug/mL	0.719676	0.852094
Mother Machine	untreated	1.28628	1.83611		1 ug/mL	0.754532	0.880013
Mother Machine	untreated	1.28728	1.73263		1 ug/mL	0.686106	0.623941
Mother Machine	untreated	1.28828	1.23608		1 ug/mL	0.689065	0.752325
Mother Machine	untreated	1.28928	1.44928		1 ug/mL	0.655024	0.593114
Mother Machine	untreated	1.29028	1.2428		1 ug/mL	0.655024	0.593114
Mother Machine	untreated	1.29128	1.52028		1 ug/mL	0.854278	0.781766
Mother Machine	untreated	1.29228	1.62374		1 ug/mL	0.720506	0.72875
Mother Machine	untreated	1.29328	1.4926		1 ug/mL	0.720506	0.72875
Mother Machine	untreated	1.29428	1.83194		1 ug/mL	0.784901	0.916894
Mother Machine	untreated	1.29528	1.11704		1 ug/mL	0.784901	0.916894
Mother Machine	untreated	1.29628	1.51016		1 ug/mL	0.854278	0.781766
Mother Machine	untreated	1.29728	1.90532		1 ug/mL	0.720506	0.72875
Mother Machine	untreated	1.29828	1.44985		1 ug/mL	0.720506	0.72875
Mother Machine	untreated	1.29928	1.43709		1 ug/mL	0.784901	0.916894
Mother Machine	untreated	1.30028	1.50134		1 ug/mL	0.784901	0.916894
Mother Machine	untreated	1.30128	1.51344		1 ug/mL	0.787457	0.654047
Mother Machine	untreated	1.30228	1.37803		1 ug/mL	0.787457	0.718797
Mother Machine	untreated	1.30328	1.38371		1 ug/mL	0.720752	0.720615
Mother Machine	untreated	1.30428	1.52084		1 ug/mL	0.785165	0.917502
Mother Machine	untreated	1.30528	1.4176		1 ug/mL	0.851334	0.780901
Mother Machine	untreated	1.30628	1.51021		1 ug/mL	0.817609	0.688644
Mother Machine	untreated	1.30728	1.63478		1 ug/mL	0.817609	0.688644
Mother Machine	untreated	1.30828	1.22493		1 ug/mL	0.754129	1.09188
Mother Machine	untreated	1.30928	1.56307		1 ug/mL	0.785524	0.792362
Mother Machine	untreated	1.31028	1.84636		1 ug/mL	0.817861	0.687643
Mother Machine	untreated	1.31128	2.60447		1 ug/mL	0.817861	0.687643
Mother Machine	untreated	1.31228	1.69429		1 ug/mL	0.785978	0.919023
Mother Machine	untreated	1.31328	1.63086		1 ug/mL	0.817127	0.75761
Mother Machine	untreated	1.31428	1.11286		1 ug/mL	0.817127	0.75761
Mother Machine	untreated	1.31528	1.77378		1 ug/mL	0.787368	1.58083
Mother Machine	untreated	1.31628	1.49557		1 ug/mL	0.787368	1.04509
Mother Machine	untreated	1.31728	1.7618		1 ug/mL	0.784749	0.721284
Mother Machine	untreated	1.31828	2.10092		1 ug/mL	0.753017	0.491148
Mother Machine	untreated	1.31928	1.4436		1 ug/mL	0.753017	0.491148
Mother Machine	untreated	1.32028	1.55435		1 ug/mL	1.05115	1.04878
Mother Machine	untreated	1.32128	1.43758		1 ug/mL	0.721747	0.782996
Mother Machine	untreated	1.32228	1.81359		1 ug/mL	1.31154	0
Mother Machine	untreated	1.32328	1.81359		1 ug/mL	1.18142	0
Mother Machine	untreated	1.32428	1.4323		1 ug/mL	1.18142	0
Mother Machine	untreated	1.32528	1.70045		1 ug/mL	0.848851	0.592471
Mother Machine	untreated	1.32628	1.83458		1 ug/mL	0.720661	0.852572
Mother Machine	untreated	1.32728	2.2248		1 ug/mL	0.720661	0.852572
Mother Machine	untreated	1.32828	1.51774		1 ug/mL	0.848851	0.592471
Mother Machine	untreated	1.32928	1.51342		1 ug/mL	0.720661	0.852572
Mother Machine	untreated	1.33028	1.40923		1 ug/mL	0.720661	0.852572
Mother Machine	untreated	1.33128	1.8018		1 ug/mL	0.785473	0.653932
Mother Machine	untreated	1.33228	1.64119		1 ug/mL	0.752351	0.62951
Mother Machine	untreated	1.33328	1.50938		1 ug/mL	0.752351	0.62951
Mother Machine	untreated	1.33428	1.5075		1 ug/mL	0.752324	0.755393
Mother Machine	untreated	1.33528	1.17399		1 ug/mL	0.823935	0.87471
Mother Machine	untreated	1.33628	1.43813		1 ug/mL	0.848594	0.788938
Mother Machine	untreated	1.33728	1.50579		1 ug/mL	0.818766	0.621067
Mother Machine	untreated	1.33828	1.77644		1 ug/mL	0.818766	0.621067
Mother Machine	untreated	1.33928	1.89727		1 ug/mL	0.815805	0.820865
Mother Machine	untreated	1.34028	1.77692		1 ug/mL	0.815805	0.820865
Mother Machine	untreated	1.34128	1.63299		1 ug/mL	0.752744	0.822568
Mother Machine	untreated	1.34228	1.82639		1 ug/mL	0.818335	0.430904
Mother Machine	untreated	1.34328	1.82653		1 ug/mL	0.818335	0.430904
Mother Machine	untreated	1.34428	1.56235		1 ug/mL	1.01163	1.21916
Mother Machine	untreated	1.34528	1.0491		1 ug/mL	1.01163	1.21916
Mother Machine	untreated	1.34628	1.44945		1 ug/mL	1.01163	0.944731
Mother Machine	untreated	1.34728	1.18269		1 ug/mL	1.1154	0.71733
Mother Machine	untreated	1.34828	1.24176		1 ug/mL	0.978182	0.792826
Mother Machine	untreated	1.34928	1.5052		1 ug/mL	0.819274	0.618071
Mother Machine	untreated	1.35028	1.98798		1 ug/mL	0.819274	0.946937
Mother Machine	untreated	1.35128	1.57056		1 ug/mL	0.819274	0.946937
Mother Machine	untreated	1.35228	1.44382		1 ug/mL	0.883106	0.558122
Mother Machine	untreated	1.35328	1.31108		1 ug/mL	0.883106	0.558122
Mother Machine	untreated	1.35428	1.76323		1 ug/mL	0.883106	0.750224
Mother Machine	untreated	1.35528	1.36855		1 ug/mL	0.821814	1.20559
Mother Machine	untreated	1.35628	1.24214		1 ug/mL	1.0137	0.62143
Mother Machine	untreated	1.35728	1.97278
Mother Machine	untreated	1.35828	1.57372
Mother Machine	untreated	1.35928	1.70272
Mother Machine	untreated	1.36028	2.01936
Mother Machine	untreated	1.36128	1.82949
Mother Machine	untreated	1.36228	1.38181
Mother Machine	untreated	1.36328	1.70476
Mother Machine	untreated	1.36428	2.1514
Mother Machine	untreated	1.36528	1.5041
Mother Machine	untreated	1.36628	1.41676
Mother Machine	untreated	1.36728	2.21109
Mother Machine	untreated	1.36828	1.32515
Mother Machine	untreated	1.36928	1.58328
Mother Machine	untreated	1.37028	1.84186
Mother Machine	untreated	1.37128	1.31959
Mother Machine	untreated	1.37228	1.50003
Mother Machine	untreated	1.37328	1.96379
Mother Machine	untreated	1.37428	2.08988
Mother Machine	untreated	1.37528	1.64427
Mother Machine	untreated	1.37628	1.51798
Mother Machine	untreated	1.37728	1.90593
Mother Machine	untreated	1.37828	1.90507
Mother Machine	untreated	1.37928	1.64145
Mother Machine	untreated	1.38028	1.77543
Mother Machine	untreated	1.38128	2.16229
Mother Machine	untreated	1.38228	1.76471
Mother Machine	untreated	1.38328	1.70833
Mother Machine	untreated	1.38428	1.49882
Mother Machine	untreated	1.38528	1.62433
Mother Machine	untreated	1.38628	1.69606
Mother Machine	untreated	1.38728	1.04435
Mother Machine	untreated	1.38828	1.69144
Mother Machine	untreated	1.38928	1.31251
Mother Machine	untreated	1.39028	1.78209
Mother Machine	untreated	1.39128	1.10691
Mother Machine	untreated	1.39228	2.15159
Mother Machine	untreated	1.39328	1.82337
Mother Machine	untreated	1.39428	1.89477
Mother Machine	untreated	1.39528	1.17862
Mother Machine	untreated	1.39628	1.96789
Mother Machine	untreated	1.39728	1.57404
Mother Machine	untreated	1.39828	1.51546
Mother Machine	untreated	1.39928	1.76459
Mother Machine	untreated	1.40028	1.5058
Mother Machine	untreated	1.40128	2.0592
Mother Machine	untreated	1.40228	1.06116
Mother Machine	untreated	1.40328	2.02986
Mother Machine	untreated	1.40428	1.89152
Mother Machine	untreated	1.40528	1.76785
Mother Machine	untreated	1.40628	1.57283
Mother Machine	untreated	1.40728	1.84874
Mother Machine	untreated	1.40828	2.48808
Mother Machine	untreated	1.40928	2.09363
Mother Machine	untreated	1.41028	1.56154
Mother Machine	untreated	1.41128	1.68417
Mother Machine	untreated	1.41228	1.57362
Mother Machine	untreated	1.41328	1.76494
Mother Machine	untreated	1.41428	1.89671
Mother Machine	untreated	1.41528	1.90462
Mother Machine	untreated	1.41628	1.7695
Mother Machine	untreated	1.41728	2.1046
Mother Machine	untreated	1.41828	1.83517
Mother Machine	untreated	1.41928	1.56827
Mother Machine	untreated	1.42028	1.70239
Mother Machine	untreated	1.42128	2.0228
Mother Machine	untreated	1.42228	1.55558
Mother Machine	untreated	1.42328	1.55558
Mother Machine	untreated	1.42428	2.32916
Mother Machine	untreated	1.42528	1.9326
Mother Machine	untreated	1.42628	1.57283
Mother Machine	untreated	1.42728	1.84874
Mother Machine	untreated	1.42828	2.48808
Mother Machine	untreated	1.42928	2.09363
Mother Machine	untreated	1.43028	1.56154
Mother Machine	untreated	1.43128	1.68417
Mother Machine	untreated	1.43228	1.57362
Mother Machine	untreated	1.43328	1.76494
Mother Machine	untreated	1.43428	1.89671
Mother Machine	untreated	1.43528	1.90462
Mother Machine	untreated	1.43628	1.7695
Mother Machine	untreated	1.43728	2.1046
Mother Machine	untreated	1.43828	1.83517
Mother Machine	untreated	1.43928	1.56827
Mother Machine	untreated	1.44028	1.70239
Mother Machine	untreated	1.44128	2.0228
Mother Machine	untreated	1.44228	1.55558
Mother Machine	untreated	1.44328	1.55558
Mother Machine	untreated	1.44428	2.32916
Mother Machine	untreated	1.44528	1.9326
Mother Machine	untreated	1.44628	2.15737
Mother Machine	untreated	1.44728	1.6346
Mother Machine	untreated	1.44828	1.75916
Mother Machine	untreated	1.44928	1.5079
Mother Machine	untreated	1.45028	1.51062
Mother Machine	untreated	1.45128	2.22054
Mother Machine	untreated	1.45228	1.57043
Mother Machine	untreated	1.45328	1.4332
Mother Machine	untreated	1.45428	2.2864
Mother Machine	untreated	1.45528	2.02658
Mother Machine	untreated	1.45628	2.49822
Mother Machine	untreated	1.45728	1.60105
Mother Machine	untreated	1.45828	2.34676
Mother Machine	untreated	1.45928	1.82883
Mother Machine	untreated	1.46028	2.16155
Mother Machine	untreated	1.46128	1.371
Mother Machine	untreated	1.46228	1.97167
Mother Machine	untreated	1.46328	1.71319
Mother Machine	untreated	1.46428	1.96079
Mother Machine	untreated	1.46528	1.75749
Mother Machine	untreated	1.46628	2.0249
Mother Machine	untreated	1.46728	2.03084
Mother Machine	untreated	1.46828	1.88433
Mother Machine	untreated	1.46928	1.63717
Mother Machine	untreated	1.47028	1.96072
Mother Machine	untreated	1.47128	1.86889
Mother Machine	untreated	1.47228	1.43803
Mother Machine	untreated	1.47328	1.60108
Mother Machine	untreated	1.47428	1.57164
Mother Machine	untreated	1.47528	2.02634
Mother Machine	untreated	1.47628	1.02955
Mother Machine	untreated	1.47728	1.64163
Mother Machine	untreated	1.47828	1.89043
Mother Machine	untreated	1.47928	2.03138
Mother Machine	untreated	1.48028	1.3804
Mother Machine	untreated	1.48128	1.88326
Mother Machine	untreated	1.48228	1.70202
Mother Machine	untreated	1.48328	1.19667
Mother Machine	untreated	1.48428	1.05478
Mother Machine	untreated	1.48528	1.44144
Mother Machine	untreated	1.48628	1.9687
Mother Machine	untreated	1.48728	1.95123
Mother Machine	untreated	1.48828	1.76707
Mother Machine	untreated	1.48928	1.70704
Mother Machine	untreated	1.49028	1.17653
Mother Machine	untreated	1.49128	1.7153
Mother Machine	untreated	1.49228	1.69181
Mother Machine	untreated	1.49328	1.69873
Mother Machine	untreated	1.49428	2.09449
Mother Machine	untreated	1.49528	2.34913
Mother Machine	untreated	1.49628	2.15618
Mother Machine	untreated	1.49728	1.55215
Mother Machine	untreated	1.49828	1.55215
Mother Machine	untreated	1.49928	1.35983
Mother Machine	untreated	1.50028	1.22397
Mother Machine	untreated	1.50128	1.904
Mother Machine	untreated	1.50228	1.63302
Mother Machine	untreated	1.50328	1.82331
Mother Machine	untreated	1.50428	1.31369
Mother Machine	untreated	1.50528	1.77994
Mother Machine	untreated	1.50628	1.50922
Mother Machine	untreated	1.50728	1.76958
Mother Machine	untreated	1.50828	1.95914
Mother Machine	untreated	1.50928	2.16044
Mother Machine	untreated	1.51028	1.52025
Mother Machine	untreated	1.51128	1.76129
Mother Machine	untreated	1.51228	1.95613
Mother Machine	untreated	1.51328	1.95481
Mother Machine	untreated	1.51428	2.08653
Mother Machine	untreated	1.51528	1.83908
Mother Machine	untreated	1.51628	1.51568
Mother Machine	untreated	1.51728	1.89331
Mother Machine	untreated	1.51828	1.318
Mother Machine	untreated	1.51928	1.63132
Mother Machine	untreated	1.52028	1.82834
Mother Machine	untreated	1.52128	1.95861
Mother Machine	untreated	1.52228	1.96486
Mother Machine	untreated	1.52328	1.18173
Mother Machine	untreated	1.52428	2.1535
Mother Machine	untreated	1.52528	2.26892
Mother Machine	untreated	1.52628	1.39438
Mother Machine	untreated	1.52728	1.90614
Mother Machine	untreated	1.52828	1.30781
Mother Machine	untreated	1.52928	0.912241
Mother Machine	untreated	1.53028	1.97593
Mother Machine	untreated	1.53128	1.89335
Mother Machine	untreated	1.53228	1.5437
Mother Machine	untreated	1.53328	1.30848
Mother Machine	untreated	1.53428	2.35175
Mother Machine	untreated	1.53528	1.61298
Mother Machine	untreated	1.53628	2.23004
Mother Machine	untreated	1.53728	1.32405
Mother Machine	untreated	1.53828	2.28492
Mother Machine	untreated	1.53928	1.7074
Mother Machine	untreated	1.54028	1.44272
Mother Machine	untreated	1.54128	1.62402
Mother Machine	untreated	1.54228	1.69959
Mother Machine	untreated	1.54328	1.4412
Mother Machine	untreated	1.54428	1.7022
Mother Machine	untreated	1.54528	1.24577
Mother Machine	untreated	1.54628	1.37733
Mother Machine	untreated	1.54728	1.25492
Mother Machine	untreated	1.54828	1.30848
Mother Machine	untreated	1.54928	2.35175
Mother Machine	untreated	1.55028	1.61298
Mother Machine	untreated	1.55128	2.23004
Mother Machine	untreated	1.55228	1.32405
Mother Machine	untreated	1.55328	2.28492
Mother Machine	untreated	1.55428	1.7074
Mother Machine	untreated	1.55528	1.44272
Mother Machine	untreated	1.55628	1.62402
Mother Machine	untreated	1.55728	1.69959
Mother Machine	untreated	1.55828	1.4412
Mother Machine	untreated	1.55928	1.7022
Mother Machine	untreated	1.56028	1.24577
Mother Machine	untreated	1.56128	1.37733
Mother Machine	untreated	1.56228	1.25492
Mother Machine	untreated	1.56328	1.77257
Mother Machine	untreated	1.56428	2.30202
Mother Machine	untreated	1.56528	1.88586
Mother Machine	untreated	1.56628	2.02441
Mother Machine	untreated	1.56728	1.76286
Mother Machine	untreated	1.56828	2.02832
Mother Machine	untreated	1.56928	1.70035
Mother Machine	untreated	1.57028	1.82728
Mother Machine	untreated	1.57128	1.93622
Mother Machine	untreated	1.57228	1.43211
Mother Machine	untreated	1.57328	1.83209
Mother Machine	untreated	1.57428	1.76781
Mother Machine	untreated	1.57528	1.63605
Mother Machine	untreated	1.57628	1.51353
Mother Machine	untreated	1.57728	1.75664
Mother Machine	untreated	1.57828	1.63643
Mother Machine	untreated	1.57928	1.84208
Mother Machine	untreated	1.58028	2.01794
Mother Machine	untreated	1.58128	1.43675
Mother Machine	untreated	1.58228	1.4457
Mother Machine	untreated	1.58328	1.84086
Mother Machine	untreated	1.58428	1.30763
Mother Machine	untreated	1.58528	0.930759
Mother Machine	untreated	1.58628	1.77722
Mother Machine	untreated	1.58728	1.57577
Mother Machine	untreated	1.58828	1.69719
Mother Machine	untreated	1.58928	1.77635
Mother Machine	untreated	1.59028	2.29775
Mother Machine	untreated	1.59128	1.4501
Mother Machine	untreated	1.59228	1.7025
Mother Machine	untreated	1.59328	1.5049
Mother Machine	untreated	1.59428	1.49984
Mother Machine	untreated	1.59528	1.82286
Mother Machine	untreated	1.59628	1.63303
Mother Machine	untreated	1.59728	1.77045
Mother Machine	untreated	1.59828	1.30504
Mother Machine	untreated	1.59928	1.89657
Mother Machine	untreated	1.60028	2.29763
Mother Machine	untreated	1.60128	1.55938
Mother Machine	untreated	1.60228	2.02442
Mother Machine	untreated	1.60328	1.51799
Mother Machine	untreated	1.60428	1.51252
Mother Machine	untreated	1.60528	1.25505
Mother Machine	untreated	1.60628	1.18067
Mother Machine	untreated	1.60728	1.62934
Mother Machine	untreated	1.60828	1.90543
Mother Machine	untreated	1.60928	1.50015
Mother Machine	untreated	1.61028	1.38403
Mother Machine	untreated	1.61128	2.56923
Mother Machine	untreated	1.61228	2.09002
Mother Machine	untreated	1.61328	1.7902
Mother Machine	untreated	1.61428	2.21557
Mother Machine	untreated	1.61528	1.45111
Mother Machine	untreated	1.61628	1.69568
Mother Machine	untreated	1.61728	1.642
Mother Machine	untreated	1.61828	1.70301
Mother Machine	untreated	1.61928	1.30401
Mother Machine	untreated	1.62028	1.95821
Mother Machine	untreated	1.62128	2.21371
Mother Machine	untreated	1.62228	1.778
Mother Machine	untreated	1.62328	1.96348
Mother Machine	untreated	1.62428	1.72189
Mother Machine	untreated	1.62528	1.75275
Mother Machine	untreated	1.62628	1.77523
Mother Machine	untreated	1.62728	1.70822
Mother Machine	untreated	1.62828	3.23115
Mother Machine	untreated	1.62928	2.79558
Mother Machine	untreated	1.63028	1.53
Mother Machine	untreated	1.63128	1.74067
Mother Machine	untreated	1.63228	1.89668
Mother Machine	untreated	1.63328	1.76187
Mother Machine	untreated	1.63428	2.15199
Mother Machine	untreated	1.63528	1.82597
Mother Machine	untreated	1.63628	1.96121
Mother Machine	untreated	1.63728	1.96146
Mother Machine	untreated	1.63828	1.43535
Mother Machine	untreated	1.63928	1.89846
Mother Machine	untreated	1.64028	1.30201
Mother Machine	untreated	1.64128	1.43188
Mother Machine	untreated	1.64228	1.7092
Mother Machine	untreated	1.64328	1.82676
Mother Machine	untreated	1.64428	1.7206
Mother Machine	untreated	1.64528	2.08763
Mother Machine	untreated	1.64628	1.25829
Mother Machine	untreated	1.64728	1.77046
Mother Machine	untreated	1.64828	2.27493
Mother Machine	untreated	1.64928	1.83284
Mother Machine	untreated	1.65028	1.97159
Mother Machine	untreated	1.65128	1.32785
Mother Machine	untreated	1.65228	1.55855
Mother Machine	untreated	1.65328	1.25735
Mother Machine	untreated	1.65428	1.37571
Mother Machine	untreated	1.65528	1.42342
Mother Machine	untreated	1.65628	1.47846
Mother Machine	untreated	1.65728	1.47846
Mother Machine	untreated	1.65828	1.67388
Mother Machine	untreated	1.65928	1.57651
Mother Machine	untreated	1.66028	1.32053
Mother Machine	untreated	1.66128	1.51525
Mother Machine	untreated	1.66228	2.08366
Mother Machine	untreated	1.66328	1.83968
Mother Machine	untreated	1.66428	2.29181
Mother Machine	untreated	1.66528	1.00038
Mother Machine	untreated	1.66628	1.37023
Mother Machine	untreated	1.66728	1.88196
Mother Machine	untreated	1.66828	1.63862
Mother Machine	untreated	1.66928	1.56071
Mother Machine	untreated	1.67028	1.64755
Mother Machine	untreated	1.67128	2.28033
Mother Machine	untreated	1.67228	1.06444
Mother Machine	untreated	1.67328	2.22791
Mother Machine	untreated	1.67428	1.9629
Mother Machine	untreated	1.67528	1.44536
Mother Machine	untreated	1.67628	1.88414
Mother Machine	untreated	1.67728	1.37296
Mother Machine	untreated	1.67828	1.63154
Mother Machine	untreated	1.67928	1.49408
Mother Machine	untreated	1.68028	1.68932
Mother Machine	untreated	1.68128	1.6311
Mother Machine	untreated	1.68228	2.02871
Mother Machine	untreated	1.68328	1.56813
Mother Machine	untreated	1.68428	1.70385
Mother Machine	untreated	1.68528	1.18305
Mother Machine	untreated	1.68628	1.9026
Mother Machine	untreated	1.68728	2.61571
Mother Machine	untreated	1.68828	1.84253
Mother Machine	untreated	1.68928	1.89972
Mother Machine	untreated	1.69028	1.63947
Mother Machine	untreated	1.69128	1.37809
Mother Machine	untreated	1.69228	1.89807
Mother Machine	untreated	1.69328	1.50823
Mother Machine	untreated	1.69428	1.43594
Mother Machine	untreated	1.69528	1.89664
Mother Machine	untreated	1.69628	2.09177
Mother Machine	untreated	1.69728	1.56934
Mother Machine	untreated	1.69828	1.3012
Mother Machine	untreated	1.69928	1.3012
Mother Machine	untreated	1.70028	1.64007
Mother Machine	untreated	1.70128	1.93094
Mother Machine	untreated	1.70228	1.4224
Mother Machine	untreated	1.70328	2.19165
Mother Machine	untreated	1.70428	1.50211
Mother Machine	untreated	1.70528	1.31412
Mother Machine	untreated	1.70628	1.44759
Mother Machine	untreated	1.70728	2.02835
Mother Machine	untreated	1.70828	1.63409
Mother Machine	untreated	1.70928	1.57928
Mother Machine	untreated	1.71028	1.82025
Mother Machine	untreated	1.71128	1.43047
Mother Machine	untreated	1.71228	2.08532
Mother Machine	untreated	1.71328	1.82264
Mother Machine	untreated	1.71428	1.698
Mother Machine	untreated	1.71528	1.51629
Mother Machine	untreated	1.71628	1.24394
Mother Machine	untreated	1.71728	1.57788
Mother Machine	untreated	1.71828	1.44512
Mother Machine	untreated	1.71928	2.22892
Mother Machine	untreated	1.72028	1.84673
Mother Machine	untreated	1.72128	1.57698
Mother Machine	untreated	1.72228	2.02172
Mother Machine	untreated	1.72328	1.50022
Mother Machine	untreated	1.72428	1.96902
Mother Machine	untreated	1.72528	1.24545
Mother Machine	untreated	1.72628	1.88768
Mother Machine	untreated	1.72728	1.96252
Mother Machine	untreated	1.72828	1.09971
Mother Machine	untreated	1.72928	1.5776
Mother Machine	untreated	1.73028	2.41718
Mother Machine	untreated	1.73128	1.55244
Mother Machine	untreated	1.73228	1.38066
Mother Machine	untreated	1.73328	1.80015
Mother Machine	untreated	1.73428	1.84499
Mother Machine	untreated	1.73528	1.84357
Mother Machine	untreated	1.73628	2.48384
Mother Machine	untreated	1.73728	1.74496
Mother Machine	untreated	1.73828	1.42651
Mother Machine	untreated	1.73928	1.64966
Mother Machine	untreated	1.74028	1.30612
Mother Machine	untreated	1.74128	1.70485
Mother Machine	untreated	1.74228	1.63997
Mother Machine	untreated	1.74328	1.63855
Mother Machine	untreated	1.74428	1.95382
Mother Machine	untreated	1.74528	1.70941
Mother Machine	untreated	1.74628	1.95986
Mother Machine	untreated	1.74728	1.32875
Mother Machine	untreated	1.74828	1.50317
Mother Machine	untreated	1.74928	1.18065
Mother Machine	untreated	1.75028	1.83279
Mother Machine	untreated	1.75128	1.89709
Mother Machine	untreated	1.75228	1.61386
Mother Machine	untreated	1.75328	1.62402
Mother Machine	untreated	1.75428	1.30802
Mother Machine	untreated	1.75528	1.30721
Mother Machine	untreated	1.75628	2.34874
Mother Machine	untreated	1.75728	2.03197
Mother Machine	untreated	1.75828	1.75973
Mother Machine	untreated	1.75928	1.77089
Mother Machine	untreated	1.76028	1.37334
Mother Machine	untreated	1.76128	2.03604
Mother Machine	untreated	1.76228	1.52954
Mother Machine	untreated	1.76328	1.75642
Mother Machine	untreated	1.76428	1.52954
Mother Machine	untreated	1.76528	1.75642
Mother Machine	untreated	1.76628	1.63914
Mother Machine	untreated	1.76728	1.10909
Mother Machine	untreated	1.76828	1.44574
Mother Machine	untreated	1.76928	1.91059
Mother Machine	untreated	1.77028	1.77732
Mother Machine	untreated	1.77128	1.77054
Mother Machine	untreated	1.77228	1.75368
Mother Machine	untreated	1.77328	1.82964
Mother Machine	untreated	1.77428	2.02361
Mother Machine	untreated	1.77528	1.76381
Mother Machine	untreated	1.77628	1.3116
Mother Machine	untreated	1.77728	1.44559
Mother Machine	untreated	1.77828	1.30815
Mother Machine	untreated	1.77928	2.21417
Mother Machine	untreated	1.78028	1.70618
Mother Machine	untreated	1.78128	2.08681
Mother Machine	untreated	1.78228	2.10039
Mother Machine	untreated	1.78328	1.96073
Mother Machine	untreated	1.78428	2.09886
Mother Machine	untreated	1.78528	1.89742
Mother Machine	untreated	1.78628	1.76768
Mother Machine	untreated	1.78728	1.96331
Mother Machine	untreated	1.78828	1.44056
Mother Machine	untreated	1.78928	1.89991
Mother Machine	untreated	1.79028	1.76002
Mother Machine	untreated	1.79128	1.18165
Mother Machine	untreated	1.79228	1.82459
Mother Machine	untreated	1.79328	2.23027
Mother Machine	untreated	1.79428	1.97574
Mother Machine	untreated	1.79528	2.07601
Mother Machine	untreated	1.79628	1.80519
Mother Machine	untreated	1.79728	1.97243
Mother Machine	untreated	1.79828	1.57176
Mother Machine	untreated	1.79928	1.31634
Mother Machine	untreated	1.80028	1.4328
Mother Machine	untreated	1.80128	1.84134
Mother Machine	untreated	1.80228	1.70079
Mother Machine	untreated	1.80328	1.63568
Mother Machine	untreated	1.80428	1.7691
Mother Machine	untreated	1.80528	1.64694
Mother Machine	untreated	1.80628	1.57114
Mother Machine	untreated	1.80728	1.95466
Mother Machine	untreated	1.80828	1.63282
Mother Machine	untreated	1.80928	1.36781
Mother Machine	untreated	1.81028	1.78824
Mother Machine	untreated	1.81128	1.83966
Mother Machine	untreated	1.81228	1.96003
Mother Machine	untreated	1.81328	1.8349
Mother Machine	untreated	1.81428	1.96314
Mother Machine	untreated	1.81528	1.18711
Mother Machine	untreated	1.81628	1.454
Mother Machine	untreated	1.81728	0.977006
Mother Machine	untreated	1.81828	1.62255
Mother Machine	untreated	1.81928	1.70675
Mother Machine	untreated	1.82028	1.70642
Mother Machine	untreated	1.82128	2.02188
Mother Machine	untreated	1.82228	1.90042
Mother Machine	untreated	1.82328	1.38601
Mother Machine	untreated	1.82428	1.76793
Mother Machine	untreated	1.82528	1.50322
Mother Machine	untreated	1.82628	1.69635
Mother Machine	untreated	1.82728	1.69635
Mother Machine	untreated	1.82828	1.76849
Mother Machine	untreated	1.82928	1.90767
Mother Machine	untreated	1.83028	1.71181
Mother Machine	untreated	1.83128	1.83286
Mother Machine	untreated	1.83228	1.63823
Mother Machine	untreated	1.83328	1.82714
Mother Machine	untreated	1.83428	1.56633
Mother Machine	untreated	1.83528	1.0465
Mother Machine	untreated	1.83628	1.9137
Mother Machine	untreated	1.83728	2.29448
Mother Machine	untreated	1.83828	1.37387
Mother Machine	untreated	1.83928	1.89902
Mother Machine	untreated	1.84028	1.88839
Mother Machine	untreated	1.84128	1.51016
Mother Machine	untreated	1.84228	1.25013
Mother Machine	untreated	1.84328	1.77678
Mother Machine	untreated	1.84428	1.29843
Mother Machine	untreated	1.84528	1.17093
Mother Machine	untreated	1.84628	2.22706
Mother Machine	untreated	1.84728	2.21225
Mother Machine	untreated	1.84828	1.76628
Mother Machine	untreated	1.84928	1.50851
Mother Machine	untreated	1.85028	2.54687
Mother Machine	untreated	1.85128	2.14925
Mother Machine	untreated	1.85228	1.64671
Mother Machine	untreated	1.85328	2.16031
Mother Machine	untreated	1.85428	1.5105
Mother Machine	untreated	1.85528	1.31095
Mother Machine	untreated	1.85628	1.32033
Mother Machine	untreated	1.85728	2.21744
Mother Machine	untreated	1.85828	1.43657
Mother Machine	untreated	1.85928	2.21391
Mother Machine	untreated	1.86028	1.38428
Mother Machine	untreated	1.86128	0.857688
Mother Machine	untreated	1.86228	1.56778
Mother Machine	untreated	1.86328	0.916181
Mother Machine	untreated	1.86428	1.70604
Mother Machine	untreated	1.86528	1.82463
Mother Machine	untreated	1.86628	1.43789
Mother Machine	untreated	1.86728	1.83985
Mother Machine	untreated	1.86828	1.96347
Mother Machine	untreated	1.86928	1.63824
Mother Machine	untreated	1.87028	1.62385
Mother Machine	untreated	1.87128	1.6311
Mother Machine	untreated	1.87228	1.70049
Mother Machine	untreated	1.87328	1.17775
Mother Machine	untreated	1.87428	1.40402
Mother Machine	untreated	1.87528	1.40402
Mother Machine	untreated	1.87628	1.8411
Mother Machine	untreated	1.87728	1.33023
Mother Machine	untreated	1.87828	1.59196
Mother Machine	untreated	1.87928	1.50115
Mother Machine	untreated	1.88028	1.75538
Mother Machine	untreated	1.88128	1.69063
Mother Machine	untreated	1.88228	1.7068
Mother Machine	untreated	1.88328	1.37904
Mother Machine	untreated	1.88428	2.22518
Mother Machine	untreated	1.88528	1.43499
Mother Machine	untreated	1.88628	1.63609
Mother Machine	untreated	1.88728	1.3196
Mother Machine	untreated	1.88828	1.83157
Mother Machine	untreated	1.88928	1.57584
Mother Machine	untreated	1.89028	1.57768
Mother Machine	untreated	1.89128	1.96248
Mother Machine	untreated	1.89228	1.96021
Mother Machine	untreated	1.89328	1.78394
Mother Machine	untreated	1.89428	1.56794
Mother Machine	untreated	1.89528	1.45351
Mother Machine	untreated	1.89628	2.025
Mother Machine	untreated	1.89728	2.02053
Mother Machine	untreated	1.89828	1.56195
Mother Machine	untreated	1.89928	1.70899
Mother Machine	untreated	1.90028	1.24237
Mother Machine	untreated	1.90128	1.302
Mother Machine	untreated	1.90228	1.16379
Mother Machine	untreated	1.90328	1.67734
Mother Machine	untreated	1.90428	1.57232
Mother Machine	untreated	1.90528	1.69357
Mother Machine	untreated	1.90628	1.76383
Mother Machine	untreated	1.90728	1.64024
Mother Machine	untreated	1.90828	1.06315
Mother Machine	untreated	1.90928	1.31293
Mother Machine	untreated	1.91028	1.90745
Mother Machine	untreated	1.91128	1.44942
Mother Machine	untreated	1.91228	2.15589
Mother Machine	untreated	1.91328	1.89741
Mother Machine	untreated	1.91428	1.50617
Mother Machine	untreated	1.91528	1.57278
Mother Machine	untreated	1.91628	1.70276
Mother Machine	untreated	1.91728	1.96137
Mother Machine	untreated	1.91828	1.75018
Mother Machine	untreated	1.91928	1.58144
Mother Machine	untreated	1.92028	1.43977
Mother Machine	untreated	1.92128	1.43813
Mother Machine	untreated	1.92228	2.35047
Mother Machine	untreated	1.92328	1.68817
Mother Machine	untreated	1.92428	1.90405
Mother Machine	untreated	1.92528	1.7684
Mother Machine	untreated	1.92628	1.44016
Mother Machine	untreated	1.92728	2.22029
Mother Machine	untreated	1.92828	1.83535
Mother Machine	untreated	1.92928	1.31348
Mother Machine	untreated	1.93028	1.51272
Mother Machine	untreated	1.93128	1.82568
Mother Machine	untreated	1.93228	1.51059
Mother Machine	untreated	1.93328	1.21276
Mother Machine	untreated	1.93428	1.34118
Mother Machine	untreated	1.93528	1.85882
Mother Machine	untreated	1.93628	2.10224
Mother Machine	untreated	1.93728	1.7529
Mother Machine	untreated	1.93828	1.6245
Mother Machine	untreated	1.93928	1.6893
Mother Machine	untreated	1.94028	1.50316
Mother Machine	untreated	1.94128	1.82996
Mother Machine	untreated	1.94228	1.69713
Mother Machine	untreated	1.94328	1.96479
Mother Machine	untreated	1.94428	1.56647
Mother Machine	untreated	1.94528	1.45093
Mother Machine	untreated	1.94628	1.36581
Mother Machine	untreated	1.94728	1.24943
Mother Machine	untreated	1.94828	0.908163
Mother Machine	untreated	1.94928	1.30714
Mother Machine	untreated	1.95028	2.79997
Mother Machine	untreated	1.95128	1.31109
Mother Machine	untreated	1.95228	1.35752
Mother Machine	untreated	1.95328	1.3217
Mother Machine	untreated	1.95428	1.95281
Mother Machine	untreated	1.95528	1.53964
Mother Machine	untreated	1.95628	1.29639
Mother Machine	untreated	1.95728	1.57492
Mother Machine	untreated	1.95828	1.37925
Mother Machine	untreated	1.95928	1.12691
Mother Machine	untreated	1.96028	1.32164
Mother Machine	untreated	1.96128	1.69503
Mother Machine	untreated	1.96228	1.97365
Mother Machine	untreated	1.96328	1.21165
Mother Machine	untreated	1.96428	1.43883
Mother Machine	untreated	1.96528	1.30758
Mother Machine	untreated	1.96628	1.18825
Mother Machine	untreated	1.96728	1.37336
Mother Machine	untreated	1.96828	1.25064
Mother Machine	untreated	1.96928	1.96266
Mother Machine	untreated	1.97028	1.96052
Mother Machine	untreated	1.97128	1.24521
Mother Machine	untreated	1.97228	1.24521
Mother Machine	untreated	1.97328	1.4383
Mother Machine	untreated	1.97428	1.76019
Mother Machine	untreated	1.97528	2.22683
Mother Machine	untreated	1.97628	1.70769
Mother Machine	untreated	1.97728	1.48197
Mother Machine	untreated	1.97828	1.48197
Mother Machine	untreated	1.97928	1.03916
Mother Machine	untreated	1.98028	1.03916
Mother Machine	untreated	1.98128	1.51812
Mother Machine	untreated	1.98228	1.62703
Mother Machine	untreated	1.98328	1.48847
Mother Machine	untreated	1.98428	1.49425
Mother Machine	untreated	1.98528	1.50066
Mother Machine	untreated	1.98628	1.37578
Mother Machine	untreated	1.98728	2.47289
Mother Machine	untreated	1.98828	1.69849
Mother Machine	untreated	1.98928	1.2805
Mother Machine	untreated	1.99028	1.2805
Mother Machine	untreated	1.99128	1.25369
Mother Machine	untreated	1.99228	2.29426
Mother Machine	untreated	1.99328	2.02003
Mother Machine	untreated	1.99428	1.90503
Mother Machine	untreated	1.99528	2.08836
Mother Machine	untreated	1.99628	1.44236
Mother Machine	untreated	1.99728	1.76299
Mother Machine	untreated	1.99828	1.51363
Mother Machine	untreated	1.99928	1.69288
Mother Machine	untreated	2.00028	0.205744
Mother Machine	untreated	2.00128	2.41256
Mother Machine	untreated	2.00228	2.87474
Mother Machine	untreated	2.00328	1.57649
Mother Machine	untreated	2.00428	1.7068
Mother Machine	untreated	2.00528	1.5676
Mother Machine	untreated	2.00628	2.22422
Mother Machine	untreated	2.00728	1.23939
Mother Machine	untreated	2.00828	1.50689
Mother Machine	untreated	2.00928	1.70886
Mother Machine	untreated	2.01028	0.923524
Mother Machine	untreated	2.01128	2.5378
Mother Machine	untreated	2.01228	1.9577
Mother Machine	untreated	2.01328	2.34882
Mother Machine	untreated	2.01428	2.35046
Mother Machine	untreated	2.01528	1.96715
Mother Machine	untreated	2.01628	1.44368
Mother Machine	untreated	2.01728	1.78824
Mother Machine	untreated	2.01828	2.43266
Mother Machine	untreated	2.01928	1.26114
Mother Machine	untreated	2.02028	1.26114
Mother Machine	untreated	2.02128	1.70886
Mother Machine	untreated	2.02228	0.923524
Mother Machine	untreated	2.02328	2.5378
Mother Machine	untreated	2.02428	1.9577
Mother Machine	untreated	2.02528	2.34882
Mother Machine	untreated	2.02628	2.35046
Mother Machine	untreated	2.02728	1.96715
Mother Machine	untreated	2.02828	1.44368
Mother Machine	untreated	2.02928	1.78824
Mother Machine	untreated	2.03028	2.43266
Mother Machine	untreated	2.03128	1.26114
Mother Machine	untreated	2.03228	1.26114
Mother Machine	untreated	2.03328	2.21839
Mother Machine	untreated	2.03428	1.30709
Mother Machine	untreated	2.03528	2.16528
Mother Machine	untreated	2.03628	1.77316
Mother Machine	untreated	2.03728	1.76808
Mother Machine	untreated	2.03828	1.97361
Mother Machine	untreated	2.03928	1.3749
Mother Machine	untreated	2.04028	1.5072
Mother Machine	untreated	2.04128	2.02423
Mother Machine	untreated	2.04228	1.36369
Mother Machine	untreated	2.04328	1.45067
Mother Machine	untreated	2.04428	1.89847
Mother Machine	untreated	2.04528	2.07454
Mother Machine	untreated	2.04628	1.63668
Mother Machine	untreated	2.04728	1.8244
Mother Machine	untreated	2.04828	1.19287
Mother Machine	untreated	2.04928	1.57326
Mother Machine	untreated	2.05028	1.82832
Mother Machine	untreated	2.05128	1.89436
Mother Machine	untreated	2.05228	2.03297
Mother Machine	untreated	2.05328	2.34578
Mother Machine	untreated	2.05428	1.50305
Mother Machine	untreated	2.05528	2.29404
Mother Machine	untreated	2.05628	1.83411
Mother Machine	untreated	2.05728	1.70507
Mother Machine	untreated	2.05828	1.7709
Mother Machine	untreated	2.05928	1.89287
Mother Machine	untreated	2.06028	1.30803
Mother Machine	untreated	2.06128	1.82877
Mother Machine	untreated	2.06228	2.02045
Mother Machine	untreated	2.06328	1.63044
Mother Machine	untreated	2.06428	1.76401
Mother Machine	untreated	2.06528	2.17451
Mother Machine	untreated	2.06628	2.35282
Mother Machine	untreated	2.06728	1.95792
Mother Machine	untreated	2.06828	1.41755
Mother Machine	untreated	2.06928	1.41755
Mother Machine	untreated	2.07028	1.57538
Mother Machine	untreated	2.07128	2.0926
Mother Machine	untreated	2.07228	1.62801
Mother Machine	untreated	2.07328	1.17562
Mother Machine	untreated	2.07428	1.9584
Mother Machine	untreated	2.07528	1.57636
Mother Machine	untreated	2.07628	1.96406
Mother Machine	untreated	2.07728	1.96405
Mother Machine	untreated	2.07828	1.5737
Mother Machine	untreated	2.07928	1.69536
Mother Machine	untreated	2.08028	1.43559
Mother Machine	untreated	2.08128	1.50726
Mother Machine	untreated	2.08228	1.50615
Mother Machine	untreated	2.08328	1.77886
Mother Machine	untreated	2.08428	1.49648
Mother Machine	untreated	2.08528	1.82657
Mother Machine	untreated	2.08628	1.77431
Mother Machine	untreated	2.08728	1.9179
Mother Machine	untreated	2.08828	1.9179
Mother Machine	untreated	2.08928	1.85448
Mother Machine	untreated	2.09028	1.83088
Mother Machine	untreated	2.09128	1.95922
Mother Machine	untreated	2.09228	1.82348
Mother Machine	untreated	2.09328	1.27977
Mother Machine	untreated	2.09428	1.83397
Mother Machine	untreated	2.09528	1.04453
Mother Machine	untreated	2.09628	1.40291
Mother Machine	untreated	2.09728	1.70462
Mother Machine	untreated	2.09828	1.56953
Mother Machine	untreated	2.09928	1.6402
Mother Machine	untreated	2.10028	1.04307
Mother Machine	untreated	2.10128	1.20072
Mother Machine	untreated	2.10228	1.51483
Mother Machine	untreated	2.10328	1.64941
Mother Machine	untreated	2.10428	1.30858
Mother Machine	untreated	2.10528	1.4345
Mother Machine	untreated	2.10628	1.18209
Mother Machine	untreated	2.10728	1.37119
Mother Machine	untreated	2.10828	1.50622
Mother Machine	untreated	2.10928	1.37344
Mother Machine	untreated	2.11028	1.11743
Mother Machine	untreated	2.11128	1.76537
Mother Machine	untreated	2.11228	2.09588
Mother Machine	untreated	2.11328	1.18117
Mother Machine	untreated	2.11428	1.3835
Mother Machine	untreated	2.11528	1.65013
Mother Machine	untreated	2.11628	1.11155
Mother Machine	untreated	2.11728	1.23773
Mother Machine	untreated	2.11828	1.11382
Mother Machine	untreated	2.11928	1.56187
Mother Machine	untreated	2.12028	1.18308
Mother Machine	untreated	2.12128	1.58323
Mother Machine	untreated	2.12228	1.57344
Mother Machine	untreated	2.12328	1.82955
Mother Machine	untreated	2.12428	1.51266
Mother Machine	untreated	2.12528	1.38838
Mother Machine	untreated	2.12628	1.70205
Mother Machine	untreated	2.12728	1.72543
Mother Machine	untreated	2.12828	2.29685
Mother Machine	untreated	2.12928	1.534
Mother Machine	untreated	2.13028	1.37155
Mother Machine	untreated	2.13128	1.51713
Mother Machine	untreated	2.13228	1.38911
Mother Machine	untreated	2.13328	1.91244
Mother Machine	untreated	2.13428	1.96022
Mother Machine	untreated	2.13528	1.68384
Mother Machine	untreated	2.13628	1.82184
Mother Machine	untreated	2.13728	2.16584
Mother Machine	untreated	2.13828	1.75955
Mother Machine	untreated	2.13928	1.38099
Mother Machine	untreated	2.14028	1.65526
Mother Machine	untreated	2.14128	1.17354
Mother Machine	untreated	2.14228	1.84141
Mother Machine	untreated	2.14328	1.84347
Mother Machine	untreated	2.14428	1.96009
Mother Machine	untreated	2.14528	1.51658
Mother Machine	untreated	2.14628	1.18512
Mother Machine	untreated	2.14728	1.05228
Mother Machine	untreated	2.14828	1.30116
Mother Machine	untreated	2.14928	1.89449
Mother Machine	untreated	2.15028	1.44539
Mother Machine	untreated	2.15128	1.71355
Mother Machine	untreated	2.15228	1.43052
Mother Machine	untreated	2.15328	1.43442
Mother Machine	untreated	2.15428	1.62671
Mother Machine	untreated	2.15528	1.62671
Mother Machine	untreated	2.15628	1.17853
Mother Machine	untreated	2.15728	1.5336
Mother Machine	untreated	2.15828	1.5336
Mother Machine	untreated	2.15928	1.90501
Mother Machine	untreated	2.16028	1.64435
Mother Machine	untreated	2.16128	1.29057
Mother Machine	untreated	2.16228	2.01514
Mother Machine	untreated	2.16328	1.56007
Mother Machine	untreated	2.16428	1.17518
Mother Machine	untreated	2.16528	1.26619
Mother Machine	untreated	2.16628	2.02665
Mother Machine	untreated	2.16728	2.02639
Mother Machine	untreated	2.16828	1.30811
Mother Machine	untreated	2.16928	1.43497
Mother Machine	untreated	2.17028	1.6437
Mother Machine	untreated	2.17128	2.0289
Mother Machine	untreated	2.17228	1.50514
Mother Machine	untreated	2.17328	1.37451
Mother Machine	untreated	2.17428	1.96774
Mother Machine	untreated	2.17528	1.50311
Mother Machine	untreated	2.17628	1.37141
Mother Machine	untreated	2.17728	3.08207
Mother Machine	untreated	2.17828	2.09582
Mother Machine	untreated	2.17928	1.77079
Mother Machine	untreated	2.18028	1.89367
Mother Machine	untreated	2.18128	1.78282
Mother Machine	untreated	2.18228	1.24095
Mother Machine	untreated	2.18328	1.24095
Mother Machine	untreated	2.18428	2.01715
Mother Machine	untreated	2.18528	2.01895
Mother Machine	untreated	2.18628	1.78242
Mother Machine	untreated	2.18728	1.39514
Mother Machine	untreated	2.18828	1.49471
Mother Machine	untreated	2.18928	2.15038
Mother Machine	untreated	2.19028	1.44497
Mother Machine	untreated	2.19128	1.37902
Mother Machine	untreated	2.19228	1.28675
Mother Machine	untreated	2.19328	0.992533
Mother Machine	untreated	2.19428	0.866295
Mother Machine	untreated	2.19528	1.16339
Mother Machine	untreated	2.19628	1.16339
Mother Machine	untreated	2.19728	1.75205
Mother Machine	untreated	2.19828	1.30504
Mother Machine	untreated	2.19928	1.56549
Mother Machine	untreated	2.20028	1.69924
Mother Machine	untreated	2.20128	1.05756
Mother Machine	untreated	2.20228	1.7722
Mother Machine	untreated	2.20328	1.44952
Mother Machine	untreated	2.20428	1.5706
Mother Machine	untreated	2.20528	2.54305
Mother Machine	untreated	2.20628	1.83679
Mother Machine	untreated	2.20728	1.89904
Mother Machine	untreated	2.20828	1.50079
Mother Machine	untreated	2.20928	1.1869
Mother Machine	untreated	2.21028	1.5764
Mother Machine	untreated	2.21128	1.70993
Mother Machine	untreated	2.21228	1.94683
Mother Machine	untreated	2.21328	1.50216
Mother Machine	untreated	2.21428	1.56371
Mother Machine	untreated	2.21528	2.14485
Mother Machine	untreated	2.21628	1.35913
Mother Machine	untreated	2.21728	1.49148
Mother Machine	untreated	2.21828	2.02725
Mother Machine	untreated	2.21928	1.76357
Mother Machine	untreated	2.22028	1.44342
Mother Machine	untreated	2.22128	1.50126
Mother Machine	untreated	2.22228	1.70841
Mother Machine	untreated	2.22328	2.34026
Mother Machine	untreated	2.22428	1.38933
Mother Machine	untreated	2.22528	1.52335
Mother Machine	untreated	2.22628	0.784024
Mother Machine	untreated	2.22728	1.26915
Mother Machine	untreated	2.22828	1.69935
Mother Machine	untreated	2.22928	2.01585
Mother Machine	untreated	2.23028	1.56691
Mother Machine	untreated	2.23128	2.08475
Mother Machine	untreated	2.23228	1.83343
Mother Machine	untreated	2.23328	1.69634
Mother Machine	untreated	2.23428	1.8332
Mother Machine	untreated	2.23528	2.21223
Mother Machine	untreated	2.23628	1.76482
Mother Machine	untreated	2.23728	1.82873
Mother Machine	untreated	2.23828	1.44253
Mother Machine	untreated	2.23928	2.22069
Mother Machine	untreated	2.24028	1.4165
Mother Machine	untreated	2.24128	1.6358
Mother Machine	untreated	2.24228	1.38408
Mother Machine	untreated	2.24328	1.51081
Mother Machine	untreated	2.24428	1.96293
Mother Machine	untreated	2.24528	1.12378
Mother Machine	untreated	2.24628	1.49821
Mother Machine	untreated	2.24728	1.63688
Mother Machine	untreated	2.24828	1.43515
Mother Machine	untreated	2.24928	1.22084
Mother Machine	untreated	2.25028	1.57314
Mother Machine	untreated	2.25128	1.76452
Mother Machine	untreated	2.25228	2.25999
Mother Machine	untreated	2.25328	1.52523
Mother Machine	untreated	2.25428	1.63881
Mother Machine	untreated	2.25528	2.2155
Mother Machine	untreated	2.25628	1.10421
Mother Machine	untreated	2.25728	1.63955
Mother Machine	untreated	2.25828	2.28824
Mother Machine	untreated	2.25928	1.95704
Mother Machine	untreated	2.26028	1.4755
Mother Machine	untreated	2.26128	1.17729
Mother Machine	untreated	2.26228	1.04471
Mother Machine	untreated	2.26328	1.44327
Mother Machine	untreated	2.26428	1.58393
Mother Machine	untreated	2.26528	2.22956
Mother Machine	untreated	2.26628	1.24486
Mother Machine	untreated	2.26728	2.1525
Mother Machine	untreated	2.26828	1.37364
Mother Machine	untreated	2.26928	1.70162
Mother Machine	untreated	2.27028	1.574
Mother Machine	untreated	2.27128	1.64243
Mother Machine	untreated	2.27228	1.63413
Mother Machine	untreated	2.27328	1.10518
Mother Machine	untreated	2.27428	1.57009
Mother Machine	untreated	2.27528	1.32129
Mother Machine	untreated	2.27628	1.25126
Mother Machine	untreated	2.27728	1.11283
Mother Machine	untreated	2.27828	1.77139
Mother Machine	untreated	2.27928	1.88668
Mother Machine	untreated	2.28028	1.77632
Mother Machine	untreated	2.28128	1.51613
Mother Machine	untreated	2.28228	1.70358
Mother Machine	untreated	2.28328	1.71353
Mother Machine	untreated	2.28428	1.96983
Mother Machine	untreated	2.28528	2.02378
Mother Machine	untreated	2.28628	2.03138
Mother Machine	untreated	2.28728	1.3142
Mother Machine	untreated	2.28828	1.70017
Mother Machine	untreated	2.28928	1.76513
Mother Machine	untreated	2.29028	1.51868
Mother Machine	untreated	2.29128	1.50456
Mother Machine	untreated	2.29228	1.82544
Mother Machine	untreated	2.29328	1.3653
Mother Machine	untreated	2.29428	1.04453
Mother Machine	untreated	2.29528	1.68438
Mother Machine	untreated	2.29628	1.29757
Mother Machine	untreated	2.29728	1.70374
Mother Machine	untreated	2.29828	1.90094
Mother Machine	untreated	2.29928	1.58067
Mother Machine	untreated	2.30028	0.988723
Mother Machine	untreated	2.30128	1.37735
Mother Machine	untreated	2.30228	1.0619
Mother Machine	untreated	2.30328	2.16505
Mother Machine	untreated	2.30428	1.63621
Mother Machine	untreated	2.30528	2.21384
Mother Machine	untreated	2.30628	2.07712
Mother Machine	untreated	2.30728	1.38654
Mother Machine	untreated	2.30828	1.51418
Mother Machine	untreated	2.30928	1.59294
Mother Machine	untreated	2.31028	1.59263
Mother Machine	untreated	2.31128	1.44505
Mother Machine	untreated	2.31228	1.49969
Mother Machine	untreated	2.31328	1.70896
Mother Machine	untreated	2.31428	1.87531
Mother Machine	untreated	2.31528	1.87531
Mother Machine	untreated	2.31628	1.6718
Mother Machine	untreated	2.31728	2.02722
Mother Machine	untreated	2.31828	1.42505
Mother Machine	untreated	2.31928	1.93762
Mother Machine	untreated	2.32028	2.07252
Mother Machine	untreated	2.32128	1.6976
Mother Machine	untreated	2.32228	1.82993
Mother Machine	untreated	2.32328	1.70896
Mother Machine	untreated	2.32428	1.87531
Mother Machine	untreated	2.32528	1.87531
Mother Machine	untreated	2.32628	1.6718
Mother Machine	untreated	2.32728	2.02722
Mother Machine	untreated	2.32828	1.42505
Mother Machine	untreated	2.32928	1.93762
Mother Machine	untreated	2.33028	2.07252
Mother Machine	untreated	2.33128	1.6976
Mother Machine	untreated	2.33228	1.82993
Mother Machine	untreated	2.33328	1.54436
Mother Machine	untreated	2.33428	1.3481
Mother Machine	untreated	2.33528	2.06565
Mother Machine	untreated	2.33628	1.95638
Mother Machine	untreated	2.33728	2.02254
Mother Machine	untreated	2.33828	1.63565
Mother Machine	untreated	2.33928	1.88581
Mother Machine	untreated	2.34028	1.31013
Mother Machine	untreated	2.34128	1.30985
Mother Machine	untreated	2.34228	1.50661
Mother Machine	untreated	2.34328	1.24871
Mother Machine	untreated	2.34428	1.76361
Mother Machine	untreated	2.34528	1.64557
Mother Machine	untreated	2.34628	1.38599
Mother Machine	untreated	2.34728	1.50404
Mother Machine	untreated	2.34828	1.6419
Mother Machine	untreated	2.34928	1.81748
Mother Machine	untreated	2.35028	1.18164
Mother Machine	untreated	2.35128	1.57617
Mother Machine	untreated	2.35228	1.70189
Mother Machine	untreated	2.35328	1.76927
Mother Machine	untreated	2.35428	1.49776
Mother Machine	untreated	2.35528	1.25199
Mother Machine	untreated	2.35628	1.64619
Mother Machine	untreated	2.35728	1.5044
Mother Machine	untreated	2.35828	1.78705
Mother Machine	untreated	2.35928	1.88289
Mother Machine	untreated	2.36028	1.63589
Mother Machine	untreated	2.36128	1.63308
Mother Machine	untreated	2.36228	1.90499
Mother Machine	untreated	2.36328	1.39114
Mother Machine	untreated	2.36428	1.23022
Mother Machine	untreated	2.36528	1.8281
Mother Machine	untreated	2.36628	1.70411
Mother Machine	untreated	2.36728	1.55428
Mother Machine	untreated	2.36828	2.33989
Mother Machine	untreated	2.36928	1.46077
Mother Machine	untreated	2.37028	1.6292
Mother Machine	untreated	2.37128	1.37756
Mother Machine	untreated	2.37228	1.2013
Mother Machine	untreated	2.37328	0.931334
Mother Machine	untreated	2.37428	1.50224
Mother Machine	untreated	2.37528	1.63733
Mother Machine	untreated	2.37628	1.50557
Mother Machine	untreated	2.37728	1.37565
Mother Machine	untreated	2.37828	1.45252
Mother Machine	untreated	2.37928	1.11423
Mother Machine	untreated	2.38028	1.11826
Mother Machine	untreated	2.38128	1.63216
Mother Machine	untreated	2.38228	1.24049
Mother Machine	untreated	2.38328	1.88939
Mother Machine	untreated	2.38428	1.89019
Mother Machine	untreated	2.38528	1.96765
Mother Machine	untreated	2.38628	1.74827
Mother Machine	untreated	2.38728	2.2047
Mother Machine	untreated	2.38828	1.58268
Mother Machine	untreated	2.38928	1.95851
Mother Machine	untreated	2.39028	1.8295
Mother Machine	untreated	2.39128	1.63823
Mother Machine	untreated	2.39228	1.76496
Mother Machine	untreated	2.39328	1.51381
Mother Machine	untreated	2.39428	2.28727
Mother Machine	untreated	2.39528	1.95909
Mother Machine	untreated	2.39628	1.37672
Mother Machine	untreated	2.39728	2.28535
Mother Machine	untreated	2.39828	1.69471
Mother Machine	untreated	2.39928	1.69471
Mother Machine	untreated	2.40028	1.82072
Mother Machine	untreated	2.40128	1.69894
Mother Machine	untreated	2.40228	1.72096
Mother Machine	untreated	2.40328	1.23508
Mother Machine	untreated	2.40428	1.63058
Mother Machine	untreated	2.40528	1.97041
Mother Machine	untreated	2.40628	1.82163
Mother Machine	untreated	2.40728	2.34132
Mother Machine	untreated	2.40828	1.62977
Mother Machine	untreated	2.40928	1.77019
Mother Machine	untreated	2.41028	1.51284
Mother Machine	untreated	2.41128	1.37023
Mother Machine	untreated	2.41228	1.5111
Mother Machine	untreated	2.41328	1.57205
Mother Machine	untreated	2.41428	1.30473
Mother Machine	untreated	2.41528	1.82076
Mother Machine	untreated	2.41628	1.83494
Mother Machine	untreated	2.41728	1.96765
Mother Machine	untreated	2.41828	1.96047
Mother Machine	untreated	2.41928	1.96966
Mother Machine	untreated	2.42028	1.83369
Mother Machine	untreated	2.42128	1.45005
Mother Machine	untreated	2.42228	1.77107
Mother Machine	untreated	2.42328	2.032
Mother Machine	untreated	2.42428	1.51032
Mother Machine	untreated	2.42528	1.57021
Mother Machine	untreated	2.42628	1.35857
Mother Machine	untreated	2.42728	2.09337
Mother Machine	untreated	2.42828	1.44605
Mother Machine	untreated	2.42928	1.37745
Mother Machine	untreated	2.43028	1.57943
Mother Machine	untreated	2.43128	1.65648
Mother Machine	untreated	2.43228	1.63085
Mother Machine	untreated	2.43328	2.01024
Mother Machine	untreated	2.43428	1.37359
Mother Machine	untreated	2.43528	1.24809
Mother Machine	untreated	2.43628	1.70496
Mother Machine	untreated	2.43728	1.31287
Mother Machine	untreated	2.43828	1.72172
Mother Machine	untreated	2.43928	1.44342
Mother Machine	untreated	2.44028	1.30087
Mother Machine	untreated	2.44128	1.15707
Mother Machine	untreated	2.44228	1.50932
Mother Machine	untreated	2.44328	1.6488
Mother Machine	untreated	2.44428	2.14691
Mother Machine	untreated	2.44528	1.83507
Mother Machine	untreated	2.44628	1.70341
Mother Machine	untreated	2.44728	1.44985
Mother Machine	untreated	2.44828	1.24021
Mother Machine	untreated	2.44928	2.28109
Mother Machine	untreated	2.45028	1.90516
Mother Machine	untreated	2.45128	1.72669
Mother Machine	untreated	2.45228	2.28465
Mother Machine	untreated	2.45328	1.37798
Mother Machine	untreated	2.45428	2.46901
Mother Machine	untreated	2.45528	1.84454
Mother Machine	untreated	2.45628	1.1805
Mother Machine	untreated	2.45728	1.57864
Mother Machine	untreated	2.45828	1.24404
Mother Machine	untreated	2.45928	1.5224
Mother Machine	untreated	2.46028	2.11591
Mother Machine	untreated	2.46128	1.50872
Mother Machine	untreated	2.46228	1.63277
Mother Machine	untreated	2.46328	1.53599
Mother Machine	untreated	2.46428	1.83515
Mother Machine	untreated	2.46528	1.57596
Mother Machine	untreated	2.46628	1.42249
Mother Machine	untreated	2.46728	1.62361
Mother Machine	untreated	2.46828	1.62361
Mother Machine	untreated	2.46928	1.33809
Mother Machine	untreated	2.47028	1.33809
Mother Machine	untreated	2.47128	2.032
Mother Machine	untreated	2.47228	2.03214
Mother Machine	untreated	2.47328	1.78496
Mother Machine	untreated	2.47428	1.51034
Mother Machine	untreated	2.47528	2.02365
Mother Machine	untreated	2.47628	1.63044
Mother Machine	untreated	2.47728	2.29438
Mother Machine	untreated	2.47828	1.62726
Mother Machine	untreated	2.47928	1.38754
Mother Machine	untreated	2.48028	1.64251
Mother Machine	untreated	2.48128	2.02789
Mother Machine	untreated	2.48228	2.28572
Mother Machine	untreated	2.48328	1.88116
Mother Machine	untreated	2.48428	1.63698
Mother Machine	untreated	2.48528	2.49142
Mother Machine	untreated	2.48628	1.57202
Mother Machine	untreated	2.48728	1.77282
Mother Machine	untreated	2.48828	1.49243
Mother Machine	untreated	2.48928	1.52275
Mother Machine	untreated	2.49028	1.30111
Mother Machine	untreated	2.49128	1.43733
Mother Machine	untreated	2.49228	1.57951
Mother Machine	untreated	2.49328	1.62073
Mother Machine	untreated	2.49428	1.41434
Mother Machine	untreated	2.49528	1.41434
Mother Machine	untreated	2.49628	1.3794
Mother Machine	untreated	2.49728	1.63756
Mother Machine	untreated	2.49828	1.63894
Mother Machine	untreated	2.49928	1.24357
Mother Machine	untreated	2.50028	1.77933
Mother Machine	untreated	2.50128	1.71307
Mother Machine	untreated	2.50228	2.16322
Mother Machine	untreated	2.50328	1.25228
Mother Machine	untreated	2.50428	1.88601
Mother Machine	untreated	2.50528	1.45327
Mother Machine	untreated	2.50628	1.4892
Mother Machine	untreated	2.50728	2.25279
Mother Machine	untreated	2.50828	1.63361
Mother Machine	untreated	2.50928	1.76139
Mother Machine	untreated	2.51028	1.83394
Mother Machine	untreated	2.51128	1.83261
Mother Machine	untreated	2.51228	1.84412
Mother Machine	untreated	2.51328	2.3541
Mother Machine	untreated	2.51428	2.1591
Mother Machine	untreated	2.51528	1.51091
Mother Machine	untreated	2.51628	2.15461
Mother Machine	untreated	2.51728	1.18015
Mother Machine	untreated	2.51828	1.57508
Mother Machine	untreated	2.51928	2.16578
Mother Machine	untreated	2.52028	1.0228
Mother Machine	untreated	2.52128	1.97822
Mother Machine	untreated	2.52228	2.10009
Mother Machine	untreated	2.52328	2.47936
Mother Machine	untreated	2.52428	1.54341
Mother Machine	untreated	2.52528	1.54341
Mother Machine	untreated	2.52628	1.49682
Mother Machine	untreated	2.52728	1.41122
Mother Machine	untreated	2.52828	1.24957
Mother Machine	untreated	2.52928	1.25238
Mother Machine	untreated	2.53028	1.90238
Mother Machine	untreated	2.53128	1.96612
Mother Machine	untreated	2.53228	1.69855
Mother Machine	untreated	2.53328	1.1966
Mother Machine	untreated	2.53428	1.83624
Mother Machine	untreated	2.53528	1.55932
Mother Machine	untreated	2.53628	1.63338
Mother Machine	untreated	2.53728	1.50119
Mother Machine	untreated	2.53828	2.0316
Mother Machine	untreated	2.53928	0.771024
Mother Machine	untreated	2.54028	1.76308
Mother Machine	untreated	2.54128	1.83699
Mother Machine	untreated	2.54228	2.33105
Mother Machine	untreated	2.54328	2.33317
Mother Machine	untreated	2.54428	1.58242
Mother Machine	untreated	2.54528	1.91222
Mother Machine	untreated	2.54628	1.66013
Mother Machine	untreated	2.54728	1.26213
Mother Machine	untreated	2.54828	1.37295
Mother Machine	untreated	2.54928	1.69549
Mother Machine	untreated	2.55028	1.5051
Mother Machine	untreated	2.55128	1.77845
Mother Machine	untreated	2.55228	1.94972
Mother Machine	untreated	2.55328	1.88464
Mother Machine	untreated	2.55428	1.51307
Mother Machine	untreated	2.55528	1.38847
Mother Machine	untreated	2.55628	1.30323
Mother Machine	untreated	2.55728	1.38291
Mother Machine	untreated	2.55828	1.30444
Mother Machine	untreated	2.55928	2.22925
Mother Machine	untreated	2.56028	1.30418
Mother Machine	untreated	2.56128	1.70896
Mother Machine	untreated	2.56228	2.07959
Mother Machine	untreated	2.56328	1.77806
Mother Machine	untreated	2.56428	1.64088
Mother Machine	untreated	2.56528	1.56792
Mother Machine	untreated	2.56628	1.6924
Mother Machine	untreated	2.56728	1.51255
Mother Machine	untreated	2.56828	1.11433
Mother Machine	untreated	2.56928	1.9638
Mother Machine	untreated	2.57028	1.32337
Mother Machine	untreated	2.57128	1.8206
Mother Machine	untreated	2.57228	1.24087
Mother Machine	untreated	2.57328	1.37644
Mother Machine	untreated	2.57428	2.67427
Mother Machine	untreated	2.57528	1.43856
Mother Machine	untreated	2.57628	1.77437
Mother Machine	untreated	2.57728	1.26056
Mother Machine	untreated	2.57828	1.64197
Mother Machine	untreated	2.57928	1.51789
Mother Machine	untreated	2.58028	1.9114
Mother Machine	untreated	2.58128	1.5786
Mother Machine	untreated	2.58228	1.75889
Mother Machine	untreated	2.58328	1.30549
Mother Machine	untreated	2.58428	1.70717
Mother Machine	untreated	2.58528	1.96263
Mother Machine	untreated	2.58628	2.03003
Mother Machine	untreated	2.58728	2.1591
Mother Machine	untreated	2.58828	1.52208
Mother Machine	untreated	2.58928	1.63714
Mother Machine	untreated	2.59028	1.36784
Mother Machine	untreated	2.59128	1.30929
Mother Machine	untreated	2.59228	2.02279
Mother Machine	untreated	2.59328	2.41651
Mother Machine	untreated	2.59428	1.63254
Mother Machine	untreated	2.59528	1.58109
Mother Machine	untreated	2.59628	1.31552
Mother Machine	untreated	2.59728	1.71085
Mother Machine	untreated	2.59828	1.58024
Mother Machine	untreated	2.59928	1.636
Mother Machine	untreated	2.60028	1.94461
Mother Machine	untreated	2.60128	1.63527
Mother Machine	untreated	2.60228	1.76831
Mother Machine	untreated	2.60328	2.39847
Mother Machine	untreated	2.60428	1.75974
Mother Machine	untreated	2.60528	1.77042
Mother Machine	untreated	2.60628	1.60544
Mother Machine	untreated	2.60728	1.19995
Mother Machine	untreated	2.60828	1.89852
Mother Machine	untreated	2.60928	1.38061
Mother Machine	untreated	2.61028	2.27987
Mother Machine	untreated	2.61128	2.15842
Mother Machine	untreated	2.61228	1.95075
Mother Machine	untreated	2.61328	1.83928
Mother Machine	untreated	2.61428	1.44036
Mother Machine	untreated	2.61528	1.63641
Mother Machine	untreated	2.61628	2.02562
Mother Machine	untreated	2.61728	2.02137
Mother Machine	untreated	2.61828	1.97334
Mother Machine	untreated	2.61928	1.44587
Mother Machine	untreated	2.62028	1.51234
Mother Machine	untreated	2.62128	1.56949
Mother Machine	untreated	2.62228	1.58378
Mother Machine	untreated	2.62328	1.96479
Mother Machine	untreated	2.62428	1.4965
Mother Machine	untreated	2.62528	2.02561
Mother Machine	untreated	2.62628	1.84024
Mother Machine	untreated	2.62728	1.70871
Mother Machine	untreated	2.62828	2.09094
Mother Machine	untreated	2.62928	1.55426
Mother Machine	untreated	2.63028	1.55426
Mother Machine	untreated	2.63128	1.84927
Mother Machine	untreated	2.63228	1.96688
Mother Machine	untreated	2.63328	2.02246
Mother Machine	untreated	2.63428	1.25254
Mother Machine	untreated	2.63528	1.95287
Mother Machine	untreated	2.63628	1.4325
Mother Machine	untreated	2.63728	1.42795
Mother Machine	untreated	2.63828	1.76186
Mother Machine	untreated	2.63928	1.77296
Mother Machine	untreated	2.64028	1.50154
Mother Machine	untreated	2.64128	1.90865
Mother Machine	untreated	2.64228	1.39303
Mother Machine	untreated	2.64328	1.76903
Mother Machine	untreated	2.64428	1.37332
Mother Machine	untreated	2.64528	1.51344
Mother Machine	untreated	2.64628	1.69509
Mother Machine	untreated	2.64728	1.17462
Mother Machine	untreated	2.64828	1.89362
Mother Machine	untreated	2.64928	1.64534
Mother Machine	untreated	2.65028	1.30285
Mother Machine	untreated	2.65128	1.95504
Mother Machine	untreated	2.65228	1.63874
Mother Machine	untreated	2.65328	1.52367
Mother Machine	untreated	2.65428	1.24422
Mother Machine	untreated	2.65528	1.37669
Mother Machine	untreated	2.65628	1.415
Mother Machine	untreated	2.65728	1.415
Mother Machine	untreated	2.65828	2.5585
Mother Machine	untreated	2.65928	1.56805
Mother Machine	untreated	2.66028	2.47886
Mother Machine	untreated	2.66128	1.60776
Mother Machine	untreated	2.66228	1.93453
Mother Machine	untreated	2.66328	1.70646
Mother Machine	untreated	2.66428	1.83542
Mother Machine	untreated	2.66528	1.56672
Mother Machine	untreated	2.66628	1.63715
Mother Machine	untreated	2.66728	1.76949
Mother Machine	untreated	2.66828	1.23978
Mother Machine	untreated	2.66928	1.70798
Mother Machine	untreated	2.67028	1.56846
Mother Machine	untreated	2.67128	1.52367
Mother Machine	untreated	2.67228	1.24422
Mother Machine	untreated	2.67328	1.37669
Mother Machine	untreated	2.67428	1.415
Mother Machine	untreated	2.67528	1.415
Mother Machine	untreated	2.67628	2.5585
Mother Machine	untreated	2.67728	1.56805
Mother Machine	untreated	2.67828	2.47886
Mother Machine	untreated	2.67928	1.60776
Mother Machine	untreated	2.68028	1.93453
Mother Machine	untreated	2.68128	1.70646
Mother Machine	untreated	2.68228	1.83542
Mother Machine	untreated	2.68328	1.56672
Mother Machine	untreated	2.68428	1.63715
Mother Machine	untreated	2.68528	1.76949
Mother Machine	untreated	2.68628	1.23978
Mother Machine	untreated	2.68728	1.70798
Mother Machine	untreated	2.68828	1.56846
Mother Machine	untreated	2.68928	1.38167
Mother Machine	untreated	2.69028	1.57211
Mother Machine	untreated	2.69128	2.21317
Mother Machine	untreated	2.69228	1.82729
Mother Machine	untreated	2.69328	1.43358
Mother Machine	untreated	2.69428	1.71223
Mother Machine	untreated	2.69528	1.35369
Mother Machine	untreated	2.69628	1.35369
Mother Machine	untreated	2.69728	2.01711
Mother Machine	untreated	2.69828	1.38838
Mother Machine	untreated	2.69928	1.89755
Mother Machine	untreated	2.70028	1.71622
Mother Machine	untreated	2.70128	1.43968
Mother Machine	untreated	2.70228	1.49159
Mother Machine	untreated	2.70328	2.01311
Mother Machine	untreated	2.70428	2.21655
Mother Machine	untreated	2.70528	1.81239
Mother Machine	untreated	2.70628	1.81239
Mother Machine	untreated	2.70728	1.42741
Mother Machine	untreated	2.70828	1.82695
Mother Machine	untreated	2.70928	1.61967
Mother Machine	untreated	2.71028	1.82415
Mother Machine	untreated	2.71128	1.82415
Mother Machine	untreated	2.71228	1.48612
Mother Machine	untreated	2.71328	1.65985
Mother Machine	untreated	2.71428	1.6561
Mother Machine	untreated	2.71528	1.6561
Mother Machine	untreated	2.71628	1.34476
Mother Machine	untreated	2.71728	2.22309
Mother Machine	untreated	2.71828	1.83149
Mother Machine	untreated	2.71928	1.4485
Mother Machine	untreated	2.72028	1.76504
Mother Machine	untreated	2.72128	1.56331
Mother Machine	untreated	2.72228	1.56592
Mother Machine	untreated	2.72328	2.5289
Mother Machine	untreated	2.72428	1.57159
Mother Machine	untreated	2.72528	1.95648
Mother Machine	untreated	2.72628	1.30858
Mother Machine	untreated	2.72728	1.82392
Mother Machine	untreated	2.72828	1.6825
Mother Machine	untreated	2.72928	2.30288
Mother Machine	untreated	2.73028	1.86399
Mother Machine	untreated	2.73128	2.03532
Mother Machine	untreated	2.73228	1.71421
Mother Machine	untreated	2.73328	1.83124
Mother Machine	untreated	2.73428	1.83471
Mother Machine	untreated	2.73528	1.56772
Mother Machine	untreated	2.73628	1.83109
Mother Machine	untreated	2.73728	2.07901
Mother Machine	untreated	2.73828	1.89075
Mother Machine	untreated	2.73928	1.64995
Mother Machine	untreated	2.74028	0.981088
Mother Machine	untreated	2.74128	1.12073
Mother Machine	untreated	2.74228	1.43437
Mother Machine	untreated	2.74328	1.90003
Mother Machine	untreated	2.74428	2.28293
Mother Machine	untreated	2.74528	1.89551
Mother Machine	untreated	2.74628	1.97017
Mother Machine	untreated	2.74728	1.50244
Mother Machine	untreated	2.74828	2.28762
Mother Machine	untreated	2.74928	1.37751
Mother Machine	untreated	2.75028	1.5776
Mother Machine	untreated	2.75128	0.780049
Mother Machine	untreated	2.75228	2.34924
Mother Machine	untreated	2.75328	1.83948
Mother Machine	untreated	2.75428	1.30882
Mother Machine	untreated	2.75528	1.56182
Mother Machine	untreated	2.75628	1.96074
Mother Machine	untreated	2.75728	1.96748
Mother Machine	untreated	2.75828	1.35777
Mother Machine	untreated	2.75928	1.50971
Mother Machine	untreated	2.76028	1.63884
Mother Machine	untreated	2.76128	1.89168
Mother Machine	untreated	2.76228	1.82825
Mother Machine	untreated	2.76328	1.62138
Mother Machine	untreated	2.76428	1.62138
Mother Machine	untreated	2.76528	2.22964
Mother Machine	untreated	2.76628	1.44214
Mother Machine	untreated	2.76728	1.51846
Mother Machine	untreated	2.76828	1.50799
Mother Machine	untreated	2.76928	2.28178
Mother Machine	untreated	2.77028	1.88614
Mother Machine	untreated	2.77128	1.83516
Mother Machine	untreated	2.77228	1.31563
Mother Machine	untreated	2.77328	1.70786
Mother Machine	untreated	2.77428	1.44685
Mother Machine	untreated	2.77528	2.27174
Mother Machine	untreated	2.77628	1.75507
Mother Machine	untreated	2.77728	1.7639
Mother Machine	untreated	2.77828	1.50657
Mother Machine	untreated	2.77928	1.8494
Mother Machine	untreated	2.78028	1.43824
Mother Machine	untreated	2.78128	1.57877
Mother Machine	untreated	2.78228	1.36224
Mother Machine	untreated	2.78328	1.36224
Mother Machine	untreated	2.78428	1.80582
Mother Machine	untreated	2.78528	2.46386
Mother Machine	untreated	2.78628	1.79998
Mother Machine	untreated	2.78728	1.41825
Mother Machine	untreated	2.78828	1.57114
Mother Machine	untreated	2.78928	1.71586
Mother Machine	untreated	2.79028	1.43191
Mother Machine	untreated	2.79128	1.43191
Mother Machine	untreated	2.79228	1.22016

## Sheet: Fig3D
condition	A22 concentration	Average D period (min)	Slope initiation adder
Mother Machine	0	26.1652	0.0902012
Mother Machine	0	19.3192	-0.0246711
Mother Machine	0	19.0609	-0.10462
Mother Machine	0.25	34.9277	-0.153063
Mother Machine	0.25	20.6622	0.116539
Mother Machine	0.25	28.3878	-0.356757
Mother Machine	0.25	35.9695	0.0660928
Mother Machine	0.5	38.2703	0.190921
Mother Machine	0.5	70.1199	-0.0292266
Mother Machine	0.5	41.4783	-0.0482809
Mother Machine	0.5	37.7647	0.220527
Mother Machine	1	88.6346	0.0507657
Mother Machine	1	74.0305	-0.48419
Mother Machine	1	44.2308	0.286547

## Sheet: Fig3E
condition	A22 concentration	Initiation length per ori (norm.)	Added length during C+D period (norm.)		A22 concentration	Initiation length per ori (norm.)	Added length during C+D period (norm.)
Mother Machine	untreated	0.791175	1.75134		1 ug/mL	0.752887	1.57623
Mother Machine	untreated	0.792175	1.15911		1 ug/mL	0.752887	1.57623
Mother Machine	untreated	0.793175	1.30335		1 ug/mL	0.751805	1.5323
Mother Machine	untreated	0.794175	1.47037		1 ug/mL	0.723096	1.42917
Mother Machine	untreated	0.795175	1.59991		1 ug/mL	0.723096	1.75892
Mother Machine	untreated	0.796175	1.36887		1 ug/mL	0.722465	1.5676
Mother Machine	untreated	0.797175	1.58536		1 ug/mL	0.722465	1.82317
Mother Machine	untreated	0.798175	1.11021		1 ug/mL	0.784988	1.50714
Mother Machine	untreated	0.799175	1.68637		1 ug/mL	0.751048	1.60545
Mother Machine	untreated	0.800175	1.66511		1 ug/mL	0.755702	1.79339
Mother Machine	untreated	0.801175	1.24672		1 ug/mL	1.14669	1.01175
Mother Machine	untreated	0.802175	1.74454		1 ug/mL	0.690688	1.40428
Mother Machine	untreated	0.803175	1.67606		1 ug/mL	0.756207	1.90929
Mother Machine	untreated	0.804175	1.34488		1 ug/mL	0.756207	1.72434
Mother Machine	untreated	0.805175	1.7229		1 ug/mL	0.750597	1.86524
Mother Machine	untreated	0.806175	1.62242		1 ug/mL	0.750597	1.77404
Mother Machine	untreated	0.807175	1.28994		1 ug/mL	0.687085	1.66948
Mother Machine	untreated	0.808175	1.57664		1 ug/mL	0.687085	1.72473
Mother Machine	untreated	0.809175	1.35906		1 ug/mL	0.72061	2.27819
Mother Machine	untreated	0.810175	1.33909		1 ug/mL	0.653175	1.90521
Mother Machine	untreated	0.811175	1.18072		1 ug/mL	0.75166	1.46866
Mother Machine	untreated	0.812175	1.28677		1 ug/mL	0.976415	1.31238
Mother Machine	untreated	0.813175	1.37212		1 ug/mL	0.656537	1.56775
Mother Machine	untreated	0.814175	1.61199		1 ug/mL	0.656537	1.74411
Mother Machine	untreated	0.815175	1.49413		1 ug/mL	0.880956	1.78164
Mother Machine	untreated	0.816175	1.09108		1 ug/mL	0.980619	1.30925
Mother Machine	untreated	0.817175	1.50831		1 ug/mL	0.722723	1.50651
Mother Machine	untreated	0.818175	1.84639		1 ug/mL	0.851197	1.44514
Mother Machine	untreated	0.819175	1.41211		1 ug/mL	0.851197	1.43436
Mother Machine	untreated	0.820175	1.68081		1 ug/mL	0.785743	1.62856
Mother Machine	untreated	0.821175	1.55568		1 ug/mL	0.785743	1.48398
Mother Machine	untreated	0.822175	1.48024		1 ug/mL	0.751111	1.33841
Mother Machine	untreated	0.823175	1.28777		1 ug/mL	0.751111	1.85728
Mother Machine	untreated	0.824175	1.17562		1 ug/mL	0.849177	1.37147
Mother Machine	untreated	0.825175	1.43028		1 ug/mL	0.849177	1.25254
Mother Machine	untreated	0.826175	1.41598		1 ug/mL	0.911971	1.50971
Mother Machine	untreated	0.827175	1.24772		1 ug/mL	0.753018	1.27154
Mother Machine	untreated	0.828175	1.55824		1 ug/mL	0.817268	1.27129
Mother Machine	untreated	0.829175	1.73035		1 ug/mL	0.71954	1.73957
Mother Machine	untreated	0.830175	1.04666		1 ug/mL	0.71954	1.82236
Mother Machine	untreated	0.831175	1.41507		1 ug/mL	0.624286	1.84037
Mother Machine	untreated	0.832175	1.65718		1 ug/mL	0.722888	1.76127
Mother Machine	untreated	0.833175	1.54402		1 ug/mL	0.914629	1.17614
Mother Machine	untreated	0.834175	1.17389		1 ug/mL	0.686743	1.99002
Mother Machine	untreated	0.835175	1.98727		1 ug/mL	0.686743	2.10815
Mother Machine	untreated	0.836175	1.3012		1 ug/mL	0.786119	1.75117
Mother Machine	untreated	0.837175	1.69908		1 ug/mL	0.786119	1.75949
Mother Machine	untreated	0.838175	1.19724		1 ug/mL	0.816355	1.60117
Mother Machine	untreated	0.839175	0.717103		1 ug/mL	0.816355	1.60117
Mother Machine	untreated	0.840175	1.47559		1 ug/mL	0.754737	1.53343
Mother Machine	untreated	0.841175	1.72795		1 ug/mL	0.752744	1.78234
Mother Machine	untreated	0.842175	1.3124		1 ug/mL	0.752744	1.6664
Mother Machine	untreated	0.843175	1.16341		1 ug/mL	0.623487	1.6628
Mother Machine	untreated	0.844175	1.61779		1 ug/mL	0.754195	2.11711
Mother Machine	untreated	0.845175	1.35888		1 ug/mL	0.754195	1.73247
Mother Machine	untreated	0.846175	1.29531		1 ug/mL	0.752825	1.85932
Mother Machine	untreated	0.847175	1.75402		1 ug/mL	0.752825	1.72696
Mother Machine	untreated	0.848175	1.5525		1 ug/mL	0.852839	1.55682
Mother Machine	untreated	0.849175	1.72516		1 ug/mL	0.752233	1.6623
Mother Machine	untreated	0.850175	1.23869		1 ug/mL	0.687074	1.86521
Mother Machine	untreated	0.851175	1.2893		1 ug/mL	0.687074	1.66259
Mother Machine	untreated	0.852175	1.47954		1 ug/mL	0.887737	1.26988
Mother Machine	untreated	0.853175	1.61188		1 ug/mL	0.754238	1.59985
Mother Machine	untreated	0.854175	1.352		1 ug/mL	0.754238	1.78721
Mother Machine	untreated	0.855175	1.55375		1 ug/mL	0.785222	1.74848
Mother Machine	untreated	0.856175	1.42767		1 ug/mL	0.785705	1.63129
Mother Machine	untreated	0.857175	1.22371		1 ug/mL	0.7536	1.7231
Mother Machine	untreated	0.858175	1.3491		1 ug/mL	0.719189	1.57017
Mother Machine	untreated	0.859175	1.88101		1 ug/mL	0.849968	1.50025
Mother Machine	untreated	0.860175	1.99661		1 ug/mL	0.849968	1.56383
Mother Machine	untreated	0.861175	1.34912		1 ug/mL	0.751005	1.59112
Mother Machine	untreated	0.862175	1.54519		1 ug/mL	0.979989	1.43648
Mother Machine	untreated	0.863175	1.28574		1 ug/mL	0.916307	1.76603
Mother Machine	untreated	0.864175	1.49689		1 ug/mL	0.916307	1.56178
Mother Machine	untreated	0.865175	1.0403		1 ug/mL	0.978444	1.44287
Mother Machine	untreated	0.866175	1.1672		1 ug/mL	0.978444	1.23724
Mother Machine	untreated	0.867175	1.35331		1 ug/mL	0.884114	1.32864
Mother Machine	untreated	0.868175	1.08323		1 ug/mL	0.884114	1.58997
Mother Machine	untreated	0.869175	1.35685		1 ug/mL	0.819866	1.40861
Mother Machine	untreated	0.870175	1.22852		1 ug/mL	0.786455	1.36475
Mother Machine	untreated	0.871175	1.4115		1 ug/mL	0.916403	1.63893
Mother Machine	untreated	0.872175	1.16994		1 ug/mL	0.916403	1.36646
Mother Machine	untreated	0.873175	1.61554		1 ug/mL	0.914594	1.55187
Mother Machine	untreated	0.874175	1.55492		1 ug/mL	0.914594	1.49572
Mother Machine	untreated	0.875175	1.40664		1 ug/mL	0.882246	1.86506
Mother Machine	untreated	0.876175	1.35903		1 ug/mL	0.882246	1.53151
Mother Machine	untreated	0.877175	1.54556		1 ug/mL	0.948741	1.53151
Mother Machine	untreated	0.878175	1.34184		1 ug/mL	0.948741	1.20877
Mother Machine	untreated	0.879175	1.42285		1 ug/mL	0.755812	1.7975
Mother Machine	untreated	0.880175	1.16226		1 ug/mL	0.784942	1.50085
Mother Machine	untreated	0.881175	1.42304		1 ug/mL	0.784942	1.56706
Mother Machine	untreated	0.882175	1.555		1 ug/mL	1.01747	1.39923
Mother Machine	untreated	0.883175	1.35903		1 ug/mL	1.01747	1.33039
Mother Machine	untreated	0.884175	1.54556		1 ug/mL	1.07637	1.339
Mother Machine	untreated	0.885175	1.34184		1 ug/mL	1.07637	1.14696
Mother Machine	untreated	0.886175	1.42285		1 ug/mL	1.00998	1.20428
Mother Machine	untreated	0.887175	1.16226		1 ug/mL	0.948406	1.25963
Mother Machine	untreated	0.888175	1.42304		1 ug/mL	0.784204	1.63435
Mother Machine	untreated	0.889175	1.555		1 ug/mL	0.784204	1.74856
Mother Machine	untreated	0.890175	1.17319		1 ug/mL	0.818546	1.40118
Mother Machine	untreated	0.891175	1.67522		1 ug/mL	0.915052	1.4851
Mother Machine	untreated	0.892175	1.55764		1 ug/mL	0.915052	1.43239
Mother Machine	untreated	0.893175	1.45893		1 ug/mL	0.945818	1.67158
Mother Machine	untreated	0.894175	1.46391		1 ug/mL	0.848891	1.30578
Mother Machine	untreated	0.895175	1.54222		1 ug/mL	0.848891	1.57724
Mother Machine	untreated	0.896175	1.36596		1 ug/mL	0.881677	1.53398
Mother Machine	untreated	0.897175	1.57658		1 ug/mL	0.686773	1.85872
Mother Machine	untreated	0.898175	1.81182		1 ug/mL	0.78784	1.62604
Mother Machine	untreated	0.899175	1.17783		1 ug/mL	0.722746	1.93703
Mother Machine	untreated	0.900175	1.48988		1 ug/mL	0.722746	1.95181
Mother Machine	untreated	0.901175	1.55962		1 ug/mL	0.754691	1.85221
Mother Machine	untreated	0.902175	1.80066		1 ug/mL	0.788612	1.56322
Mother Machine	untreated	0.903175	1.28485		1 ug/mL	1.44083	0.918327
Mother Machine	untreated	0.904175	1.35806		1 ug/mL	0.786449	1.76582
Mother Machine	untreated	0.905175	1.50001		1 ug/mL	1.29471	0.98632
Mother Machine	untreated	0.906175	1.40643		1 ug/mL	0.688567	1.7246
Mother Machine	untreated	0.907175	1.6136		1 ug/mL	0.816198	1.60185
Mother Machine	untreated	0.908175	1.42135		1 ug/mL	0.855189	1.56631
Mother Machine	untreated	0.909175	1.61962		1 ug/mL	0.855189	1.56897
Mother Machine	untreated	0.910175	1.35571		1 ug/mL	0.819155	1.39226
Mother Machine	untreated	0.911175	1.03178		1 ug/mL	0.787919	1.49649
Mother Machine	untreated	0.912175	1.74403		1 ug/mL	0.817751	1.4671
Mother Machine	untreated	0.913175	1.61488		1 ug/mL	0.817751	1.38973
Mother Machine	untreated	0.914175	1.68695		1 ug/mL	0.946996	1.27509
Mother Machine	untreated	0.915175	1.30156		1 ug/mL	0.914174	1.37753
Mother Machine	untreated	0.916175	1.48321		1 ug/mL	0.913963	1.35973
Mother Machine	untreated	0.917175	1.35794		1 ug/mL	0.755686	1.73114
Mother Machine	untreated	0.918175	1.43676		1 ug/mL	0.755686	1.65044
Mother Machine	untreated	0.919175	1.99664		1 ug/mL	0.786369	1.49599
Mother Machine	untreated	0.920175	1.48929		1 ug/mL	0.786369	1.69348
Mother Machine	untreated	0.921175	1.61739		1 ug/mL	0.688802	1.92252
Mother Machine	untreated	0.922175	1.22228		1 ug/mL	0.851279	1.56844
Mother Machine	untreated	0.923175	1.74004		1 ug/mL	0.851279	1.75838
Mother Machine	untreated	0.924175	1.24847		1 ug/mL	0.754464	1.25963
Mother Machine	untreated	0.925175	1.85868		1 ug/mL	0.784305	1.86907
Mother Machine	untreated	0.926175	1.17268		1 ug/mL	0.784305	1.76116
Mother Machine	untreated	0.927175	1.41357		1 ug/mL	0.8501	1.56725
Mother Machine	untreated	0.928175	1.54414		1 ug/mL	0.817832	1.66788
Mother Machine	untreated	0.929175	1.42044		1 ug/mL	0.883207	1.59487
Mother Machine	untreated	0.930175	1.57094		1 ug/mL	0.883207	1.4557
Mother Machine	untreated	0.931175	1.41595		1 ug/mL	0.815707	1.47002
Mother Machine	untreated	0.932175	1.22803		1 ug/mL	0.815707	1.85395
Mother Machine	untreated	0.933175	1.61883		1 ug/mL	0.752802	1.6566
Mother Machine	untreated	0.934175	1.37039		1 ug/mL	0.944541	1.41068
Mother Machine	untreated	0.935175	1.16178		1 ug/mL	0.884737	1.26913
Mother Machine	untreated	0.936175	1.75449		1 ug/mL	0.884737	1.14037
Mother Machine	untreated	0.937175	1.44138		1 ug/mL	0.721389	1.6958
Mother Machine	untreated	0.938175	1.76593		1 ug/mL	0.721389	1.69717
Mother Machine	untreated	0.939175	1.40861		1 ug/mL	0.753164	1.66435
Mother Machine	untreated	0.940175	1.31102		1 ug/mL	0.753164	1.85996
Mother Machine	untreated	0.941175	1.09985		1 ug/mL	0.88326	1.4472
Mother Machine	untreated	0.942175	1.86499		1 ug/mL	0.88326	1.27129
Mother Machine	untreated	0.943175	1.42281		1 ug/mL	1.07551	1.27448
Mother Machine	untreated	0.944175	1.37277		1 ug/mL	1.07551	1.20701
Mother Machine	untreated	0.945175	1.17457		1 ug/mL	0.752823	1.73208
Mother Machine	untreated	0.946175	1.3571		1 ug/mL	0.752823	1.4117
Mother Machine	untreated	0.947175	1.4758		1 ug/mL	0.753413	1.40309
Mother Machine	untreated	0.948175	1.41864		1 ug/mL	0.752753	2.25016
Mother Machine	untreated	0.949175	1.75068		1 ug/mL	0.752753	1.7305
Mother Machine	untreated	0.950175	1.22615		1 ug/mL	0.753189	2.11227
Mother Machine	untreated	0.951175	1.15675		1 ug/mL	0.947721	1.4024
Mother Machine	untreated	0.952175	1.81819		1 ug/mL	0.852272	1.68458
Mother Machine	untreated	0.953175	1.85006		1 ug/mL	0.821359	1.84611
Mother Machine	untreated	0.954175	1.61717		1 ug/mL	0.821359	1.79359
Mother Machine	untreated	0.955175	1.54222		1 ug/mL	0.849346	1.7682
Mother Machine	untreated	0.956175	1.47749		1 ug/mL	0.849346	1.83095
Mother Machine	untreated	0.957175	1.43884		1 ug/mL	0.816731	1.84061
Mother Machine	untreated	0.958175	1.6723		1 ug/mL	0.882107	1.99102
Mother Machine	untreated	0.959175	1.2365		1 ug/mL	0.947539	1.58405
Mother Machine	untreated	0.960175	1.53916		1 ug/mL	0.818235	1.60338
Mother Machine	untreated	0.961175	2.06279		1 ug/mL	0.818235	2.12216
Mother Machine	untreated	0.962175	1.82668		1 ug/mL	0.820691	1.77647
Mother Machine	untreated	0.963175	1.34646		1 ug/mL	0.820691	1.59323
Mother Machine	untreated	0.964175	1.52918		1 ug/mL	0.721267	1.93889
Mother Machine	untreated	0.965175	1.49012		1 ug/mL	0.721267	1.82998
Mother Machine	untreated	0.966175	1.6733		1 ug/mL	0.882452	1.59878
Mother Machine	untreated	0.967175	1.39868		1 ug/mL	0.882452	1.46578
Mother Machine	untreated	0.968175	1.36629		1 ug/mL	0.656385	1.64018
Mother Machine	untreated	0.969175	1.36147		1 ug/mL	0.850441	1.30476
Mother Machine	untreated	0.970175	1.09774		1 ug/mL	0.948664	1.40164
Mother Machine	untreated	0.971175	1.23702		1 ug/mL	0.948664	1.33305
Mother Machine	untreated	0.972175	1.39735		1 ug/mL	0.752454	1.85547
Mother Machine	untreated	0.973175	1.54285		1 ug/mL	0.753388	1.59499
Mother Machine	untreated	0.974175	1.29678		1 ug/mL	0.784225	1.76581
Mother Machine	untreated	0.975175	1.17156		1 ug/mL	0.882106	1.63037
Mother Machine	untreated	0.976175	1.67931		1 ug/mL	0.880718	1.59722
Mother Machine	untreated	0.977175	1.29111		1 ug/mL	0.654057	2.00374
Mother Machine	untreated	0.978175	1.04836		1 ug/mL	1.1828	1.22081
Mother Machine	untreated	0.979175	1.48366		1 ug/mL	0.847359	1.68521
Mother Machine	untreated	0.980175	1.54677		1 ug/mL	0.847359	1.76433
Mother Machine	untreated	0.981175	1.61484		1 ug/mL	1.31191	1.09093
Mother Machine	untreated	0.982175	1.0888		1 ug/mL	0.785358	1.49515
Mother Machine	untreated	0.983175	1.29967		1 ug/mL	0.750274	1.53832
Mother Machine	untreated	0.984175	1.16918		1 ug/mL	0.750274	1.66517
Mother Machine	untreated	0.985175	1.75177		1 ug/mL	0.754197	1.66008
Mother Machine	untreated	0.986175	1.78711		1 ug/mL	0.754197	1.73398
Mother Machine	untreated	0.987175	1.28914		1 ug/mL	0.818304	1.53313
Mother Machine	untreated	0.988175	1.36191		1 ug/mL	0.818304	1.46624
Mother Machine	untreated	0.989175	1.37055		1 ug/mL	0.754464	1.71361
Mother Machine	untreated	0.990175	1.75379		1 ug/mL	0.754464	1.91392
Mother Machine	untreated	0.991175	1.48755		1 ug/mL	0.784728	1.69946
Mother Machine	untreated	0.992175	1.18199		1 ug/mL	0.656721	1.68326
Mother Machine	untreated	0.993175	1.43825		1 ug/mL	0.687586	1.73204
Mother Machine	untreated	0.994175	1.19723		1 ug/mL	0.656721	1.68326
Mother Machine	untreated	0.995175	1.54317		1 ug/mL	0.687586	1.73204
Mother Machine	untreated	0.996175	1.49565		1 ug/mL	0.785215	1.87902
Mother Machine	untreated	0.997175	1.16634		1 ug/mL	0.750521	1.47756
Mother Machine	untreated	0.998175	1.16028		1 ug/mL	0.750521	1.72962
Mother Machine	untreated	0.999175	1.55506		1 ug/mL	0.719962	1.4344
Mother Machine	untreated	1.00017	1.34531		1 ug/mL	0.948002	1.40074
Mother Machine	untreated	1.00117	1.68204		1 ug/mL	0.752547	2.23234
Mother Machine	untreated	1.00217	1.67833		1 ug/mL	0.785706	2.05695
Mother Machine	untreated	1.00317	1.2533		1 ug/mL	0.785706	1.92331
Mother Machine	untreated	1.00417	1.13822		1 ug/mL	0.818707	1.60106
Mother Machine	untreated	1.00517	1.48279		1 ug/mL	0.817082	1.72484
Mother Machine	untreated	1.00617	1.59861		1 ug/mL	0.817006	2.04361
Mother Machine	untreated	1.00717	1.21189		1 ug/mL	0.721027	1.56903
Mother Machine	untreated	1.00817	1.29648		1 ug/mL	0.721027	1.62528
Mother Machine	untreated	1.00917	1.3611		1 ug/mL	0.880338	1.41335
Mother Machine	untreated	1.01017	1.17354		1 ug/mL	0.622079	1.92536
Mother Machine	untreated	1.01117	1.30279		1 ug/mL	0.751059	1.84229
Mother Machine	untreated	1.01217	1.60211		1 ug/mL	0.686526	1.3395
Mother Machine	untreated	1.01317	1.55426		1 ug/mL	0.915284	1.23802
Mother Machine	untreated	1.01417	1.63121		1 ug/mL	0.915284	1.29806
Mother Machine	untreated	1.01517	1.85287		1 ug/mL	0.882469	1.21103
Mother Machine	untreated	1.01617	1.29192		1 ug/mL	0.78381	1.76672
Mother Machine	untreated	1.01717	1.44078		1 ug/mL	0.78381	1.62047
Mother Machine	untreated	1.01817	1.53977		1 ug/mL	0.789771	1.69631
Mother Machine	untreated	1.01917	1.48293		1 ug/mL	0.78381	1.76672
Mother Machine	untreated	1.02017	1.4315		1 ug/mL	0.78381	1.62047
Mother Machine	untreated	1.02117	1.35635		1 ug/mL	0.789771	1.69631
Mother Machine	untreated	1.02217	1.55884		1 ug/mL	1.01017	0.896084
Mother Machine	untreated	1.02317	1.16653		1 ug/mL	0.850008	1.37527
Mother Machine	untreated	1.02417	1.68835		1 ug/mL	0.850008	1.37507
Mother Machine	untreated	1.02517	1.46633		1 ug/mL	0.784779	1.43234
Mother Machine	untreated	1.02617	0.95323		1 ug/mL	0.722199	1.37507
Mother Machine	untreated	1.02717	1.53556		1 ug/mL	0.848645	1.6248
Mother Machine	untreated	1.02817	1.28186		1 ug/mL	0.818895	1.33696
Mother Machine	untreated	1.02917	1.48384		1 ug/mL	0.820019	1.27167
Mother Machine	untreated	1.03017	1.73263		1 ug/mL	0.687434	1.77829
Mother Machine	untreated	1.03117	1.41373		1 ug/mL	0.691293	1.4608
Mother Machine	untreated	1.03217	1.68286		1 ug/mL	0.691293	1.86048
Mother Machine	untreated	1.03317	1.44375		1 ug/mL	0.916554	1.35756
Mother Machine	untreated	1.03417	1.52028		1 ug/mL	0.816272	1.34242
Mother Machine	untreated	1.03517	1.20781		1 ug/mL	0.851435	1.81514
Mother Machine	untreated	1.03617	1.43349		1 ug/mL	0.787322	1.56047
Mother Machine	untreated	1.03717	1.41145		1 ug/mL	0.787322	1.43347
Mother Machine	untreated	1.03817	1.56231		1 ug/mL	0.752773	1.79207
Mother Machine	untreated	1.03917	1.10775		1 ug/mL	0.784861	1.79622
Mother Machine	untreated	1.04017	1.36733		1 ug/mL	0.850278	1.31509
Mother Machine	untreated	1.04117	1.16733		1 ug/mL	0.752211	1.66037
Mother Machine	untreated	1.04217	1.23394		1 ug/mL	0.821078	1.71348
Mother Machine	untreated	1.04317	1.48192		1 ug/mL	0.754473	1.60003
Mother Machine	untreated	1.04417	1.23174		1 ug/mL	0.754473	1.59653
Mother Machine	untreated	1.04517	1.29331		1 ug/mL	0.821447	1.66175
Mother Machine	untreated	1.04617	1.4176		1 ug/mL	0.819234	1.53532
Mother Machine	untreated	1.04717	1.29578		1 ug/mL	0.784737	1.305
Mother Machine	untreated	1.04817	1.48315		1 ug/mL	0.913426	1.50607
Mother Machine	untreated	1.04917	1.16258		1 ug/mL	1.11924	1.26484
Mother Machine	untreated	1.05017	1.28556		1 ug/mL	0.755918	1.46144
Mother Machine	untreated	1.05117	1.47219		1 ug/mL	0.882033	1.59408
Mother Machine	untreated	1.05217	1.43578		1 ug/mL	0.819085	1.39608
Mother Machine	untreated	1.05317	1.42966		1 ug/mL	0.81898	1.39938
Mother Machine	untreated	1.05417	1.48884		1 ug/mL	0.785092	1.64389
Mother Machine	untreated	1.05517	1.55313		1 ug/mL	0.81675	1.40469
Mother Machine	untreated	1.05617	1.34793		1 ug/mL	0.850413	1.80999
Mother Machine	untreated	1.05717	1.2882		1 ug/mL	0.946502	1.58131
Mother Machine	untreated	1.05817	1.17049		1 ug/mL	0.821053	1.91408
Mother Machine	untreated	1.05917	1.35357		1 ug/mL	0.821053	1.78925
Mother Machine	untreated	1.06017	1.24589		1 ug/mL	0.849634	1.6363
Mother Machine	untreated	1.06117	1.5538		1 ug/mL	0.689763	1.71672
Mother Machine	untreated	1.06217	1.61849		1 ug/mL	0.8497	1.6324
Mother Machine	untreated	1.06317	1.092		1 ug/mL	0.719971	1.69797
Mother Machine	untreated	1.06417	1.54877		1 ug/mL	0.851333	1.37028
Mother Machine	untreated	1.06517	1.81359		1 ug/mL	0.851333	1.89009
Mother Machine	untreated	1.06617	2.04649		1 ug/mL	0.917074	1.48975
Mother Machine	untreated	1.06717	1.8065		1 ug/mL	0.8497	1.6324
Mother Machine	untreated	1.06817	1.5925		1 ug/mL	0.719971	1.69797
Mother Machine	untreated	1.06917	1.33115		1 ug/mL	0.851333	1.37028
Mother Machine	untreated	1.07017	1.40763		1 ug/mL	0.851333	1.89009
Mother Machine	untreated	1.07117	1.68034		1 ug/mL	0.917074	1.48975
Mother Machine	untreated	1.07217	1.28226		1 ug/mL	0.822879	1.40116
Mother Machine	untreated	1.07317	1.07558		1 ug/mL	0.822879	1.52638
Mother Machine	untreated	1.07417	1.423		1 ug/mL	0.719876	1.75507
Mother Machine	untreated	1.07517	1.53813		1 ug/mL	0.719876	1.74881
Mother Machine	untreated	1.07617	1.16608		1 ug/mL	0.719853	1.56563
Mother Machine	untreated	1.07717	1.49625		1 ug/mL	0.78404	1.75156
Mother Machine	untreated	1.07817	1.03018		1 ug/mL	0.78404	1.43652
Mother Machine	untreated	1.07917	1.28565		1 ug/mL	0.815678	1.54213
Mother Machine	untreated	1.08017	1.17259		1 ug/mL	0.815678	1.9859
Mother Machine	untreated	1.08117	1.30668		1 ug/mL	0.783006	1.56867
Mother Machine	untreated	1.08217	1.50083		1 ug/mL	0.848388	1.44167
Mother Machine	untreated	1.08317	1.2269		1 ug/mL	0.753263	1.84634
Mother Machine	untreated	1.08417	1.29093		1 ug/mL	0.881415	1.49993
Mother Machine	untreated	1.08517	1.3513		1 ug/mL	0.881415	1.33257
Mother Machine	untreated	1.08617	1.48592		1 ug/mL	0.784593	1.55267
Mother Machine	untreated	1.08717	1.3739		1 ug/mL	0.786273	1.69099
Mother Machine	untreated	1.08817	1.23088		1 ug/mL	0.718452	1.76511
Mother Machine	untreated	1.08917	1.36708		1 ug/mL	0.851185	1.30356
Mother Machine	untreated	1.09017	1.23411		1 ug/mL	0.754144	1.7278
Mother Machine	untreated	1.09117	1.43507		1 ug/mL	0.754144	1.9258
Mother Machine	untreated	1.09217	1.2329		1 ug/mL	0.720155	1.74085
Mother Machine	untreated	1.09317	1.8737		1 ug/mL	0.720155	1.43364
Mother Machine	untreated	1.09417	1.22954		1 ug/mL	0.754144	1.7278
Mother Machine	untreated	1.09517	0.821342		1 ug/mL	0.754144	1.9258
Mother Machine	untreated	1.09617	1.29579		1 ug/mL	0.720155	1.74085
Mother Machine	untreated	1.09717	1.2378		1 ug/mL	0.720155	1.43364
Mother Machine	untreated	1.09817	1.49882		1 ug/mL	0.785194	1.70311
Mother Machine	untreated	1.09917	1.68455		1 ug/mL	0.750889	1.79859
Mother Machine	untreated	1.10017	1.56189		1 ug/mL	0.750889	1.8025
Mother Machine	untreated	1.10117	1.50263		1 ug/mL	0.526629	2.05765
Mother Machine	untreated	1.10217	1.55318		1 ug/mL	0.526629	1.82929
Mother Machine	untreated	1.10317	1.29238		1 ug/mL	0.71725	1.49205
Mother Machine	untreated	1.10417	1.43149		1 ug/mL	0.786171	1.88876
Mother Machine	untreated	1.10517	1.69046		1 ug/mL	0.786171	1.8903
Mother Machine	untreated	1.10617	0.949447		1 ug/mL	0.756471	1.39109
Mother Machine	untreated	1.10717	1.04379		1 ug/mL	0.820801	1.77444
Mother Machine	untreated	1.10817	1.08978		1 ug/mL	0.820801	1.72741
Mother Machine	untreated	1.10917	1.61338		1 ug/mL	0.817674	1.72611
Mother Machine	untreated	1.11017	1.22665		1 ug/mL	0.752469	1.58319
Mother Machine	untreated	1.11117	1.35893		1 ug/mL	0.848561	1.3126
Mother Machine	untreated	1.11217	1.36924		1 ug/mL	0.848561	1.6944
Mother Machine	untreated	1.11317	1.53878		1 ug/mL	0.753487	1.65749
Mother Machine	untreated	1.11417	1.41494		1 ug/mL	0.852102	1.1076
Mother Machine	untreated	1.11517	1.55699		1 ug/mL	0.817644	1.73844
Mother Machine	untreated	1.11617	1.23296		1 ug/mL	0.853007	1.56343
Mother Machine	untreated	1.11717	1.16639		1 ug/mL	0.880573	1.53052
Mother Machine	untreated	1.11817	1.68902		1 ug/mL	0.784503	1.76221
Mother Machine	untreated	1.11917	1.66536		1 ug/mL	0.784503	1.50634
Mother Machine	untreated	1.12017	1.3002		1 ug/mL	0.753332	1.47559
Mother Machine	untreated	1.12117	1.24022		1 ug/mL	0.9128	1.30997
Mother Machine	untreated	1.12217	1.28439		1 ug/mL	0.9128	1.37543
Mother Machine	untreated	1.12317	1.36643		1 ug/mL	0.849696	1.57332
Mother Machine	untreated	1.12417	1.22001		1 ug/mL	0.849696	1.69941
Mother Machine	untreated	1.12517	1.4249		1 ug/mL	0.853192	1.81212
Mother Machine	untreated	1.12617	1.54355		1 ug/mL	0.849775	1.68188
Mother Machine	untreated	1.12717	0.777084		1 ug/mL	0.787238	1.43414
Mother Machine	untreated	1.12817	1.48666		1 ug/mL	0.787238	1.36677
Mother Machine	untreated	1.12917	1.3556		1 ug/mL	0.883632	1.34061
Mother Machine	untreated	1.13017	1.56695		1 ug/mL	0.883632	1.59478
Mother Machine	untreated	1.13117	1.50743		1 ug/mL	0.687251	1.47872
Mother Machine	untreated	1.13217	1.50288		1 ug/mL	0.818093	1.52764
Mother Machine	untreated	1.13317	1.91876		1 ug/mL	0.818093	1.8011
Mother Machine	untreated	1.13417	1.36568		1 ug/mL	0.948128	1.52352
Mother Machine	untreated	1.13517	1.29702		1 ug/mL	0.948128	1.34263
Mother Machine	untreated	1.13617	1.14857		1 ug/mL	0.718366	1.48589
Mother Machine	untreated	1.13717	1.43417		1 ug/mL	0.849254	1.56965
Mother Machine	untreated	1.13817	1.2947		1 ug/mL	0.88586	1.5206
Mother Machine	untreated	1.13917	1.2333		1 ug/mL	0.752449	1.6592
Mother Machine	untreated	1.14017	1.09249		1 ug/mL	0.849214	1.49955
Mother Machine	untreated	1.14117	1.2124		1 ug/mL	0.753537	1.47432
Mother Machine	untreated	1.14217	0.960022		1 ug/mL	0.817196	1.5328
Mother Machine	untreated	1.14317	1.42126		1 ug/mL	0.880425	1.51714
Mother Machine	untreated	1.14417	1.47271		1 ug/mL	0.978661	1.17106
Mother Machine	untreated	1.14517	1.16288		1 ug/mL	0.978661	1.50343
Mother Machine	untreated	1.14617	1.68323		1 ug/mL	0.819785	1.39686
Mother Machine	untreated	1.14717	1.59739		1 ug/mL	0.819785	1.45211
Mother Machine	untreated	1.14817	1.61149		1 ug/mL	0.720378	1.55357
Mother Machine	untreated	1.14917	1.40906		1 ug/mL	0.720378	1.62991
Mother Machine	untreated	1.15017	1.53698		1 ug/mL	0.815328	1.59868
Mother Machine	untreated	1.15117	1.48803		1 ug/mL	0.815328	1.59601
Mother Machine	untreated	1.15217	1.55327		1 ug/mL	0.720378	1.55357
Mother Machine	untreated	1.15317	1.62292		1 ug/mL	0.720378	1.62991
Mother Machine	untreated	1.15417	0.842695		1 ug/mL	0.815328	1.59868
Mother Machine	untreated	1.15517	1.10842		1 ug/mL	0.815328	1.59601
Mother Machine	untreated	1.15617	1.36416		1 ug/mL	0.852186	1.43491
Mother Machine	untreated	1.15717	1.5063		1 ug/mL	0.783816	1.82705
Mother Machine	untreated	1.15817	1.80456		1 ug/mL	0.783816	1.75923
Mother Machine	untreated	1.15917	1.49411		1 ug/mL	0.720879	1.76214
Mother Machine	untreated	1.16017	1.30781		1 ug/mL	0.786077	1.5705
Mother Machine	untreated	1.16117	1.48346		1 ug/mL	0.690642	1.66938
Mother Machine	untreated	1.16217	1.54111		1 ug/mL	0.819588	1.65865
Mother Machine	untreated	1.16317	1.55267		1 ug/mL	0.819588	1.33573
Mother Machine	untreated	1.16417	1.48465		1 ug/mL	0.690642	1.66938
Mother Machine	untreated	1.16517	1.75672		1 ug/mL	0.819588	1.65865
Mother Machine	untreated	1.16617	1.42681		1 ug/mL	0.819588	1.33573
Mother Machine	untreated	1.16717	1.55558		1 ug/mL	0.848062	1.3059
Mother Machine	untreated	1.16817	1.71953		1 ug/mL	0.849657	1.66504
Mother Machine	untreated	1.16917	1.45564		1 ug/mL	0.882435	1.39958
Mother Machine	untreated	1.17017	1.22844		1 ug/mL	0.849866	1.49644
Mother Machine	untreated	1.17117	1.61961		1 ug/mL	0.721875	1.5653
Mother Machine	untreated	1.17217	1.55327		1 ug/mL	0.817563	1.20832
Mother Machine	untreated	1.17317	1.62292		1 ug/mL	0.721875	1.5653
Mother Machine	untreated	1.17417	0.842695		1 ug/mL	0.817563	1.20832
Mother Machine	untreated	1.17517	1.10842		1 ug/mL	0.816872	1.79308
Mother Machine	untreated	1.17617	1.36416		1 ug/mL	0.817798	1.4656
Mother Machine	untreated	1.17717	1.5063		1 ug/mL	0.817798	1.66203
Mother Machine	untreated	1.17817	1.80456		1 ug/mL	0.685946	1.99246
Mother Machine	untreated	1.17917	1.49411		1 ug/mL	0.752882	1.86296
Mother Machine	untreated	1.18017	1.30781		1 ug/mL	0.882142	1.73405
Mother Machine	untreated	1.18117	1.48346		1 ug/mL	0.784092	1.81412
Mother Machine	untreated	1.18217	1.54111		1 ug/mL	0.815872	1.67006
Mother Machine	untreated	1.18317	1.55267		1 ug/mL	0.847937	1.36381
Mother Machine	untreated	1.18417	1.48465
Mother Machine	untreated	1.18517	1.75672
Mother Machine	untreated	1.18617	1.42681
Mother Machine	untreated	1.18717	1.55558
Mother Machine	untreated	1.18817	1.71953
Mother Machine	untreated	1.18917	1.45564
Mother Machine	untreated	1.19017	1.22844
Mother Machine	untreated	1.19117	1.61961
Mother Machine	untreated	1.19217	1.3595
Mother Machine	untreated	1.19317	1.89025
Mother Machine	untreated	1.19417	1.72527
Mother Machine	untreated	1.19517	1.17008
Mother Machine	untreated	1.19617	1.42229
Mother Machine	untreated	1.19717	1.56224
Mother Machine	untreated	1.19817	1.67797
Mother Machine	untreated	1.19917	1.62612
Mother Machine	untreated	1.20017	1.4794
Mother Machine	untreated	1.20117	1.62183
Mother Machine	untreated	1.20217	1.4138
Mother Machine	untreated	1.20317	1.5264
Mother Machine	untreated	1.20417	1.48448
Mother Machine	untreated	1.20517	1.47884
Mother Machine	untreated	1.20617	1.21673
Mother Machine	untreated	1.20717	1.55494
Mother Machine	untreated	1.20817	1.42217
Mother Machine	untreated	1.20917	1.55355
Mother Machine	untreated	1.21017	1.28416
Mother Machine	untreated	1.21117	1.56092
Mother Machine	untreated	1.21217	1.35147
Mother Machine	untreated	1.21317	1.81208
Mother Machine	untreated	1.21417	1.86889
Mother Machine	untreated	1.21517	1.60865
Mother Machine	untreated	1.21617	1.54514
Mother Machine	untreated	1.21717	1.4367
Mother Machine	untreated	1.21817	1.40861
Mother Machine	untreated	1.21917	1.43408
Mother Machine	untreated	1.22017	1.43463
Mother Machine	untreated	1.22117	1.61152
Mother Machine	untreated	1.22217	1.73972
Mother Machine	untreated	1.22317	1.60459
Mother Machine	untreated	1.22417	1.30558
Mother Machine	untreated	1.22517	1.2193
Mother Machine	untreated	1.22617	1.22716
Mother Machine	untreated	1.22717	1.22942
Mother Machine	untreated	1.22817	1.64911
Mother Machine	untreated	1.22917	1.4873
Mother Machine	untreated	1.23017	1.56277
Mother Machine	untreated	1.23117	1.61216
Mother Machine	untreated	1.23217	1.33898
Mother Machine	untreated	1.23317	1.47841
Mother Machine	untreated	1.23417	1.43276
Mother Machine	untreated	1.23517	1.67259
Mother Machine	untreated	1.23617	1.56374
Mother Machine	untreated	1.23717	1.60074
Mother Machine	untreated	1.23817	1.35616
Mother Machine	untreated	1.23917	1.7281
Mother Machine	untreated	1.24017	1.2859
Mother Machine	untreated	1.24117	1.48191
Mother Machine	untreated	1.24217	1.55215
Mother Machine	untreated	1.24317	1.52455
Mother Machine	untreated	1.24417	1.08126
Mother Machine	untreated	1.24517	1.29639
Mother Machine	untreated	1.24617	1.40579
Mother Machine	untreated	1.24717	1.1678
Mother Machine	untreated	1.24817	1.23
Mother Machine	untreated	1.24917	1.4856
Mother Machine	untreated	1.25017	1.21778
Mother Machine	untreated	1.25117	1.35608
Mother Machine	untreated	1.25217	1.47884
Mother Machine	untreated	1.25317	1.8628
Mother Machine	untreated	1.25417	1.27271
Mother Machine	untreated	1.25517	1.42664
Mother Machine	untreated	1.25617	1.41967
Mother Machine	untreated	1.25717	1.69046
Mother Machine	untreated	1.25817	1.41278
Mother Machine	untreated	1.25917	1.48496
Mother Machine	untreated	1.26017	1.16461
Mother Machine	untreated	1.26117	1.41424
Mother Machine	untreated	1.26217	1.28928
Mother Machine	untreated	1.26317	1.47586
Mother Machine	untreated	1.26417	1.6552
Mother Machine	untreated	1.26517	1.35928
Mother Machine	untreated	1.26617	1.29217
Mother Machine	untreated	1.26717	1.20623
Mother Machine	untreated	1.26817	0.953585
Mother Machine	untreated	1.26917	1.36124
Mother Machine	untreated	1.27017	1.54486
Mother Machine	untreated	1.27117	1.04025
Mother Machine	untreated	1.27217	1.40535
Mother Machine	untreated	1.27317	1.35102
Mother Machine	untreated	1.27417	1.50516
Mother Machine	untreated	1.27517	1.55083
Mother Machine	untreated	1.27617	1.53586
Mother Machine	untreated	1.27717	1.5437
Mother Machine	untreated	1.27817	1.32316
Mother Machine	untreated	1.27917	1.43771
Mother Machine	untreated	1.28017	1.53323
Mother Machine	untreated	1.28117	1.29864
Mother Machine	untreated	1.28217	1.37108
Mother Machine	untreated	1.28317	1.16962
Mother Machine	untreated	1.28417	1.4791
Mother Machine	untreated	1.28517	1.15936
Mother Machine	untreated	1.28617	1.56151
Mother Machine	untreated	1.28717	1.80436
Mother Machine	untreated	1.28817	1.17807
Mother Machine	untreated	1.28917	1.46872
Mother Machine	untreated	1.29017	1.36592
Mother Machine	untreated	1.29117	1.23811
Mother Machine	untreated	1.29217	1.36664
Mother Machine	untreated	1.29317	1.35521
Mother Machine	untreated	1.29417	1.43771
Mother Machine	untreated	1.29517	1.53323
Mother Machine	untreated	1.29617	1.29864
Mother Machine	untreated	1.29717	1.37108
Mother Machine	untreated	1.29817	1.16962
Mother Machine	untreated	1.29917	1.4791
Mother Machine	untreated	1.30017	1.15936
Mother Machine	untreated	1.30117	1.56151
Mother Machine	untreated	1.30217	1.80436
Mother Machine	untreated	1.30317	1.17807
Mother Machine	untreated	1.30417	1.46872
Mother Machine	untreated	1.30517	1.36592
Mother Machine	untreated	1.30617	1.23811
Mother Machine	untreated	1.30717	1.36664
Mother Machine	untreated	1.30817	1.35521
Mother Machine	untreated	1.30917	1.47061
Mother Machine	untreated	1.31017	1.6706
Mother Machine	untreated	1.31117	1.43422
Mother Machine	untreated	1.31217	1.68275
Mother Machine	untreated	1.31317	1.4887
Mother Machine	untreated	1.31417	1.30489
Mother Machine	untreated	1.31517	1.61065
Mother Machine	untreated	1.31617	1.60244
Mother Machine	untreated	1.31717	1.61732
Mother Machine	untreated	1.31817	1.42215
Mother Machine	untreated	1.31917	1.4095
Mother Machine	untreated	1.32017	1.24198
Mother Machine	untreated	1.32117	1.23833
Mother Machine	untreated	1.32217	1.66782
Mother Machine	untreated	1.32317	1.6164
Mother Machine	untreated	1.32417	1.36488
Mother Machine	untreated	1.32517	1.42723
Mother Machine	untreated	1.32617	1.42236
Mother Machine	untreated	1.32717	1.68212
Mother Machine	untreated	1.32817	1.55721
Mother Machine	untreated	1.32917	1.40977
Mother Machine	untreated	1.33017	1.47245
Mother Machine	untreated	1.33117	1.86348
Mother Machine	untreated	1.33217	1.1565
Mother Machine	untreated	1.33317	1.03714
Mother Machine	untreated	1.33417	1.41917
Mother Machine	untreated	1.33517	1.42399
Mother Machine	untreated	1.33617	1.3676
Mother Machine	untreated	1.33717	1.42323
Mother Machine	untreated	1.33817	1.22901
Mother Machine	untreated	1.33917	1.56197
Mother Machine	untreated	1.34017	1.60869
Mother Machine	untreated	1.34117	1.23612
Mother Machine	untreated	1.34217	1.42019
Mother Machine	untreated	1.34317	1.36111
Mother Machine	untreated	1.34417	1.55358
Mother Machine	untreated	1.34517	1.74796
Mother Machine	untreated	1.34617	1.02804
Mother Machine	untreated	1.34717	1.6399
Mother Machine	untreated	1.34817	1.36459
Mother Machine	untreated	1.34917	1.01889
Mother Machine	untreated	1.35017	1.17199
Mother Machine	untreated	1.35117	1.3536
Mother Machine	untreated	1.35217	1.42053
Mother Machine	untreated	1.35317	1.28438
Mother Machine	untreated	1.35417	1.41046
Mother Machine	untreated	1.35517	1.54617
Mother Machine	untreated	1.35617	1.30068
Mother Machine	untreated	1.35717	1.48865
Mother Machine	untreated	1.35817	0.978874
Mother Machine	untreated	1.35917	1.55252
Mother Machine	untreated	1.36017	0.965092
Mother Machine	untreated	1.36117	1.36243
Mother Machine	untreated	1.36217	1.75447
Mother Machine	untreated	1.36317	1.42454
Mother Machine	untreated	1.36417	1.36312
Mother Machine	untreated	1.36517	1.6316
Mother Machine	untreated	1.36617	1.48558
Mother Machine	untreated	1.36717	1.2875
Mother Machine	untreated	1.36817	1.47723
Mother Machine	untreated	1.36917	1.47658
Mother Machine	untreated	1.37017	1.74968
Mother Machine	untreated	1.37117	1.68732
Mother Machine	untreated	1.37217	1.3457
Mother Machine	untreated	1.37317	1.55822
Mother Machine	untreated	1.37417	1.11864
Mother Machine	untreated	1.37517	0.968236
Mother Machine	untreated	1.37617	1.34949
Mother Machine	untreated	1.37717	1.68613
Mother Machine	untreated	1.37817	1.42099
Mother Machine	untreated	1.37917	1.56177
Mother Machine	untreated	1.38017	1.22983
Mother Machine	untreated	1.38117	1.35878
Mother Machine	untreated	1.38217	1.23619
Mother Machine	untreated	1.38317	1.10776
Mother Machine	untreated	1.38417	1.49134
Mother Machine	untreated	1.38517	1.22313
Mother Machine	untreated	1.38617	1.16566
Mother Machine	untreated	1.38717	1.30416
Mother Machine	untreated	1.38817	1.42478
Mother Machine	untreated	1.38917	1.22589
Mother Machine	untreated	1.39017	1.72888
Mother Machine	untreated	1.39117	1.35274
Mother Machine	untreated	1.39217	1.35724
Mother Machine	untreated	1.39317	1.10552
Mother Machine	untreated	1.39417	1.35563
Mother Machine	untreated	1.39517	1.41489
Mother Machine	untreated	1.39617	1.17366
Mother Machine	untreated	1.39717	1.16479
Mother Machine	untreated	1.39817	1.67388
Mother Machine	untreated	1.39917	1.48443
Mother Machine	untreated	1.40017	1.47846
Mother Machine	untreated	1.40117	1.2203
Mother Machine	untreated	1.40217	1.44063
Mother Machine	untreated	1.40317	0.995576
Mother Machine	untreated	1.40417	1.36589
Mother Machine	untreated	1.40517	1.42587
Mother Machine	untreated	1.40617	1.22903
Mother Machine	untreated	1.40717	1.61297
Mother Machine	untreated	1.40817	1.29665
Mother Machine	untreated	1.40917	1.29247
Mother Machine	untreated	1.41017	1.66759
Mother Machine	untreated	1.41117	1.34633
Mother Machine	untreated	1.41217	1.56071
Mother Machine	untreated	1.41317	1.1587
Mother Machine	untreated	1.41417	1.4232
Mother Machine	untreated	1.41517	1.30469
Mother Machine	untreated	1.41617	1.16226
Mother Machine	untreated	1.41717	0.970247
Mother Machine	untreated	1.41817	1.2933
Mother Machine	untreated	1.41917	0.785264
Mother Machine	untreated	1.42017	1.61101
Mother Machine	untreated	1.42117	1.35126
Mother Machine	untreated	1.42217	1.30542
Mother Machine	untreated	1.42317	1.10304
Mother Machine	untreated	1.42417	1.30301
Mother Machine	untreated	1.42517	1.99423
Mother Machine	untreated	1.42617	1.36265
Mother Machine	untreated	1.42717	1.23253
Mother Machine	untreated	1.42817	1.42982
Mother Machine	untreated	1.42917	1.17852
Mother Machine	untreated	1.43017	1.56176
Mother Machine	untreated	1.43117	1.04167
Mother Machine	untreated	1.43217	1.21982
Mother Machine	untreated	1.43317	0.77928
Mother Machine	untreated	1.43417	1.03947
Mother Machine	untreated	1.43517	1.17041
Mother Machine	untreated	1.43617	1.73176
Mother Machine	untreated	1.43717	0.977715
Mother Machine	untreated	1.43817	1.34474
Mother Machine	untreated	1.43917	1.36319
Mother Machine	untreated	1.44017	1.49212
Mother Machine	untreated	1.44117	1.29651
Mother Machine	untreated	1.44217	1.55921
Mother Machine	untreated	1.44317	1.3012
Mother Machine	untreated	1.44417	1.40229
Mother Machine	untreated	1.44517	1.07585
Mother Machine	untreated	1.44617	1.35727
Mother Machine	untreated	1.44717	1.28616
Mother Machine	untreated	1.44817	1.42147
Mother Machine	untreated	1.44917	1.49395
Mother Machine	untreated	1.45017	1.48689
Mother Machine	untreated	1.45117	1.34994
Mother Machine	untreated	1.45217	1.54379
Mother Machine	untreated	1.45317	1.34832
Mother Machine	untreated	1.45417	1.43047
Mother Machine	untreated	1.45517	1.08957
Mother Machine	untreated	1.45617	1.4137
Mother Machine	untreated	1.45717	1.64285
Mother Machine	untreated	1.45817	0.978349
Mother Machine	untreated	1.45917	1.2422
Mother Machine	untreated	1.46017	0.921952
Mother Machine	untreated	1.46117	1.03283
Mother Machine	untreated	1.46217	1.42916
Mother Machine	untreated	1.46317	1.01794
Mother Machine	untreated	1.46417	1.16254
Mother Machine	untreated	1.46517	1.22841
Mother Machine	untreated	1.46617	1.27409
Mother Machine	untreated	1.46717	1.35984
Mother Machine	untreated	1.46817	1.14787
Mother Machine	untreated	1.46917	0.977185
Mother Machine	untreated	1.47017	1.23405
Mother Machine	untreated	1.47117	1.48682
Mother Machine	untreated	1.47217	1.60805
Mother Machine	untreated	1.47317	1.03098
Mother Machine	untreated	1.47417	1.87808
Mother Machine	untreated	1.47517	1.09815
Mother Machine	untreated	1.47617	1.54141
Mother Machine	untreated	1.47717	1.20844
Mother Machine	untreated	1.47817	1.10503
Mother Machine	untreated	1.47917	1.04165
Mother Machine	untreated	1.48017	1.09178
Mother Machine	untreated	1.48117	1.27811
Mother Machine	untreated	1.48217	1.39272
Mother Machine	untreated	1.48317	0.83482
Mother Machine	untreated	1.48417	0.901139
Mother Machine	untreated	1.48517	1.02521
Mother Machine	untreated	1.48617	1.41592
Mother Machine	untreated	1.48717	1.43146
Mother Machine	untreated	1.48817	1.2928
Mother Machine	untreated	1.48917	1.24223
Mother Machine	untreated	1.49017	1.10227
Mother Machine	untreated	1.49117	1.02097
Mother Machine	untreated	1.49217	1.03415
Mother Machine	untreated	1.49317	1.40512
Mother Machine	untreated	1.49417	1.09308
Mother Machine	untreated	1.49517	1.15225
Mother Machine	untreated	1.49617	1.41409
Mother Machine	untreated	1.49717	1.27933
Mother Machine	untreated	1.49817	1.94433
Mother Machine	untreated	1.49917	1.42892
Mother Machine	untreated	1.50017	1.35783
Mother Machine	untreated	1.50117	1.16719
Mother Machine	untreated	1.50217	1.28165
Mother Machine	untreated	1.50317	1.54355
Mother Machine	untreated	1.50417	1.35632
Mother Machine	untreated	1.50517	1.03956
Mother Machine	untreated	1.50617	1.29052
Mother Machine	untreated	1.50717	1.35006
Mother Machine	untreated	1.50817	1.77803
Mother Machine	untreated	1.50917	1.23456
Mother Machine	untreated	1.51017	1.77803
Mother Machine	untreated	1.51117	1.23456
Mother Machine	untreated	1.51217	1.23651
Mother Machine	untreated	1.51317	1.37067
Mother Machine	untreated	1.51417	1.34418
Mother Machine	untreated	1.51517	1.35504
Mother Machine	untreated	1.51617	1.41956
Mother Machine	untreated	1.51717	1.17019
Mother Machine	untreated	1.51817	1.10243
Mother Machine	untreated	1.51917	1.1717
Mother Machine	untreated	1.52017	0.97748
Mother Machine	untreated	1.52117	1.17301
Mother Machine	untreated	1.52217	1.56337
Mother Machine	untreated	1.52317	1.54953
Mother Machine	untreated	1.52417	1.68665
Mother Machine	untreated	1.52517	1.36582
Mother Machine	untreated	1.52617	1.3554
Mother Machine	untreated	1.52717	1.5509
Mother Machine	untreated	1.52817	1.43171
Mother Machine	untreated	1.52917	1.42397
Mother Machine	untreated	1.53017	1.72506
Mother Machine	untreated	1.53117	1.2908
Mother Machine	untreated	1.53217	1.4781
Mother Machine	untreated	1.53317	1.2278
Mother Machine	untreated	1.53417	1.10712
Mother Machine	untreated	1.53517	1.33485
Mother Machine	untreated	1.53617	1.03632
Mother Machine	untreated	1.53717	1.55738
Mother Machine	untreated	1.53817	1.69362
Mother Machine	untreated	1.53917	1.5654
Mother Machine	untreated	1.54017	1.35012
Mother Machine	untreated	1.54117	1.99011
Mother Machine	untreated	1.54217	1.55364
Mother Machine	untreated	1.54317	1.16324
Mother Machine	untreated	1.54417	1.35046
Mother Machine	untreated	1.54517	1.364
Mother Machine	untreated	1.54617	1.23177
Mother Machine	untreated	1.54717	1.353
Mother Machine	untreated	1.54817	1.35192
Mother Machine	untreated	1.54917	1.49348
Mother Machine	untreated	1.55017	1.28611
Mother Machine	untreated	1.55117	1.3353
Mother Machine	untreated	1.55217	1.29426
Mother Machine	untreated	1.55317	1.17848
Mother Machine	untreated	1.55417	1.36394
Mother Machine	untreated	1.55517	1.15535
Mother Machine	untreated	1.55617	1.14151
Mother Machine	untreated	1.55717	1.41012
Mother Machine	untreated	1.55817	1.5532
Mother Machine	untreated	1.55917	1.03648
Mother Machine	untreated	1.56017	1.16872
Mother Machine	untreated	1.56117	1.35684
Mother Machine	untreated	1.56217	1.42227
Mother Machine	untreated	1.56317	1.28147
Mother Machine	untreated	1.56417	1.36143
Mother Machine	untreated	1.56517	1.43439
Mother Machine	untreated	1.56617	1.67777
Mother Machine	untreated	1.56717	1.42898
Mother Machine	untreated	1.56817	1.65793
Mother Machine	untreated	1.56917	1.17405
Mother Machine	untreated	1.57017	1.69635
Mother Machine	untreated	1.57117	1.10986
Mother Machine	untreated	1.57217	1.46041
Mother Machine	untreated	1.57317	1.52056
Mother Machine	untreated	1.57417	1.3002
Mother Machine	untreated	1.57517	1.21422
Mother Machine	untreated	1.57617	1.7479
Mother Machine	untreated	1.57717	1.17439
Mother Machine	untreated	1.57817	1.21229
Mother Machine	untreated	1.57917	1.42683
Mother Machine	untreated	1.58017	1.41055
Mother Machine	untreated	1.58117	1.10697
Mother Machine	untreated	1.58217	1.21593
Mother Machine	untreated	1.58317	1.0343
Mother Machine	untreated	1.58417	1.42646
Mother Machine	untreated	1.58517	1.36226
Mother Machine	untreated	1.58617	1.55186
Mother Machine	untreated	1.58717	1.30631
Mother Machine	untreated	1.58817	1.54845
Mother Machine	untreated	1.58917	1.14695
Mother Machine	untreated	1.59017	1.41686
Mother Machine	untreated	1.59117	1.36747
Mother Machine	untreated	1.59217	1.29091
Mother Machine	untreated	1.59317	1.56355
Mother Machine	untreated	1.59417	1.67273
Mother Machine	untreated	1.59517	1.23192
Mother Machine	untreated	1.59617	1.22384
Mother Machine	untreated	1.59717	1.35391
Mother Machine	untreated	1.59817	1.36091
Mother Machine	untreated	1.59917	1.5497
Mother Machine	untreated	1.60017	1.16684
Mother Machine	untreated	1.60117	1.42713
Mother Machine	untreated	1.60217	1.61682
Mother Machine	untreated	1.60317	0.967841
Mother Machine	untreated	1.60417	1.62409
Mother Machine	untreated	1.60517	0.845667
Mother Machine	untreated	1.60617	1.08012
Mother Machine	untreated	1.60717	1.23283
Mother Machine	untreated	1.60817	1.0998
Mother Machine	untreated	1.60917	1.62812
Mother Machine	untreated	1.61017	1.67307
Mother Machine	untreated	1.61117	1.86876
Mother Machine	untreated	1.61217	1.43538
Mother Machine	untreated	1.61317	1.66692
Mother Machine	untreated	1.61417	1.41827
Mother Machine	untreated	1.61517	1.35081
Mother Machine	untreated	1.61617	1.60313
Mother Machine	untreated	1.61717	1.32622
Mother Machine	untreated	1.61817	1.36553
Mother Machine	untreated	1.61917	1.72609
Mother Machine	untreated	1.62017	1.50115
Mother Machine	untreated	1.62117	1.32242
Mother Machine	untreated	1.62217	1.02908
Mother Machine	untreated	1.62317	1.62446
Mother Machine	untreated	1.62417	1.53759
Mother Machine	untreated	1.62517	1.35716
Mother Machine	untreated	1.62617	1.5388
Mother Machine	untreated	1.62717	1.41577
Mother Machine	untreated	1.62817	1.61284
Mother Machine	untreated	1.62917	1.49515
Mother Machine	untreated	1.63017	1.49089
Mother Machine	untreated	1.63117	1.49148
Mother Machine	untreated	1.63217	1.67612
Mother Machine	untreated	1.63317	1.62579
Mother Machine	untreated	1.63417	1.29904
Mother Machine	untreated	1.63517	1.11153
Mother Machine	untreated	1.63617	1.15432
Mother Machine	untreated	1.63717	1.3502
Mother Machine	untreated	1.63817	1.22712
Mother Machine	untreated	1.63917	1.67133
Mother Machine	untreated	1.64017	1.46554
Mother Machine	untreated	1.64117	1.49725
Mother Machine	untreated	1.64217	1.28911
Mother Machine	untreated	1.64317	1.23668
Mother Machine	untreated	1.64417	1.55775
Mother Machine	untreated	1.64517	1.41644
Mother Machine	untreated	1.64617	1.50593
Mother Machine	untreated	1.64717	1.20145
Mother Machine	untreated	1.64817	1.28636
Mother Machine	untreated	1.64917	1.42203
Mother Machine	untreated	1.65017	1.29786
Mother Machine	untreated	1.65117	1.16898
Mother Machine	untreated	1.65217	1.36074
Mother Machine	untreated	1.65317	1.41622
Mother Machine	untreated	1.65417	1.35776
Mother Machine	untreated	1.65517	1.21385
Mother Machine	untreated	1.65617	1.34379
Mother Machine	untreated	1.65717	1.30409
Mother Machine	untreated	1.65817	1.3458
Mother Machine	untreated	1.65917	1.60464
Mother Machine	untreated	1.66017	1.74183
Mother Machine	untreated	1.66117	1.75018
Mother Machine	untreated	1.66217	1.43258
Mother Machine	untreated	1.66317	1.40757
Mother Machine	untreated	1.66417	1.162
Mother Machine	untreated	1.66517	1.09394
Mother Machine	untreated	1.66617	1.35752
Mother Machine	untreated	1.66717	1.2945
Mother Machine	untreated	1.66817	1.29842
Mother Machine	untreated	1.66917	1.48755
Mother Machine	untreated	1.67017	1.61248
Mother Machine	untreated	1.67117	1.86962
Mother Machine	untreated	1.67217	1.73297
Mother Machine	untreated	1.67317	0.983004
Mother Machine	untreated	1.67417	1.67164
Mother Machine	untreated	1.67517	1.48203
Mother Machine	untreated	1.67617	1.30399
Mother Machine	untreated	1.67717	1.22129
Mother Machine	untreated	1.67817	1.60139
Mother Machine	untreated	1.67917	1.1573
Mother Machine	untreated	1.68017	1.40299
Mother Machine	untreated	1.68117	1.35275
Mother Machine	untreated	1.68217	1.61672
Mother Machine	untreated	1.68317	1.17579
Mother Machine	untreated	1.68417	1.23259
Mother Machine	untreated	1.68517	1.37511
Mother Machine	untreated	1.68617	1.61716
Mother Machine	untreated	1.68717	0.972781
Mother Machine	untreated	1.68817	1.16607
Mother Machine	untreated	1.68917	1.34429
Mother Machine	untreated	1.69017	1.04363
Mother Machine	untreated	1.69117	1.16309
Mother Machine	untreated	1.69217	1.37162
Mother Machine	untreated	1.69317	1.16169
Mother Machine	untreated	1.69417	1.63008
Mother Machine	untreated	1.69517	1.35752
Mother Machine	untreated	1.69617	1.37041
Mother Machine	untreated	1.69717	1.09985
Mother Machine	untreated	1.69817	1.28233
Mother Machine	untreated	1.69917	1.36129
Mother Machine	untreated	1.70017	1.31046
Mother Machine	untreated	1.70117	1.35648
Mother Machine	untreated	1.70217	1.56413
Mother Machine	untreated	1.70317	1.4696
Mother Machine	untreated	1.70417	1.61372
Mother Machine	untreated	1.70517	1.43344
Mother Machine	untreated	1.70617	1.17631
Mother Machine	untreated	1.70717	1.29623
Mother Machine	untreated	1.70817	1.36509
Mother Machine	untreated	1.70917	1.37581
Mother Machine	untreated	1.71017	1.16625
Mother Machine	untreated	1.71117	1.10006
Mother Machine	untreated	1.71217	1.36236
Mother Machine	untreated	1.71317	1.24521
Mother Machine	untreated	1.71417	1.16951
Mother Machine	untreated	1.71517	1.23338
Mother Machine	untreated	1.71617	0.961474
Mother Machine	untreated	1.71717	0.978462
Mother Machine	untreated	1.71817	1.35727
Mother Machine	untreated	1.71917	1.43085
Mother Machine	untreated	1.72017	0.977896
Mother Machine	untreated	1.72117	0.963074
Mother Machine	untreated	1.72217	1.75794
Mother Machine	untreated	1.72317	1.36487
Mother Machine	untreated	1.72417	1.24082
Mother Machine	untreated	1.72517	1.06987
Mother Machine	untreated	1.72617	1.0702
Mother Machine	untreated	1.72717	1.46948
Mother Machine	untreated	1.72817	1.14501
Mother Machine	untreated	1.72917	1.53594
Mother Machine	untreated	1.73017	1.46632
Mother Machine	untreated	1.73117	1.07966
Mother Machine	untreated	1.73217	1.23918
Mother Machine	untreated	1.73317	0.706978
Mother Machine	untreated	1.73417	1.10167
Mother Machine	untreated	1.73517	1.23141
Mother Machine	untreated	1.73617	1.0588
Mother Machine	untreated	1.73717	1.40782
Mother Machine	untreated	1.73817	1.48591
Mother Machine	untreated	1.73917	0.977178
Mother Machine	untreated	1.74017	1.36391
Mother Machine	untreated	1.74117	0.908588
Mother Machine	untreated	1.74217	1.16914
Mother Machine	untreated	1.74317	1.09688
Mother Machine	untreated	1.74417	1.42267
Mother Machine	untreated	1.74517	1.23103
Mother Machine	untreated	1.74617	1.49462
Mother Machine	untreated	1.74717	0.649593
Mother Machine	untreated	1.74817	1.16069
Mother Machine	untreated	1.74917	1.36498
Mother Machine	untreated	1.75017	1.11258
Mother Machine	untreated	1.75117	1.55238
Mother Machine	untreated	1.75217	1.67572
Mother Machine	untreated	1.75317	1.36136
Mother Machine	untreated	1.75417	1.3544
Mother Machine	untreated	1.75517	1.30613
Mother Machine	untreated	1.75617	1.43602
Mother Machine	untreated	1.75717	1.21854
Mother Machine	untreated	1.75817	1.23707
Mother Machine	untreated	1.75917	1.63304
Mother Machine	untreated	1.76017	1.28914
Mother Machine	untreated	1.76117	1.87791
Mother Machine	untreated	1.76217	1.22345
Mother Machine	untreated	1.76317	1.40645
Mother Machine	untreated	1.76417	1.58993
Mother Machine	untreated	1.76517	1.46944
Mother Machine	untreated	1.76617	1.16431
Mother Machine	untreated	1.76717	1.30613
Mother Machine	untreated	1.76817	1.43602
Mother Machine	untreated	1.76917	1.21854
Mother Machine	untreated	1.77017	1.23707
Mother Machine	untreated	1.77117	1.63304
Mother Machine	untreated	1.77217	1.28914
Mother Machine	untreated	1.77317	1.87791
Mother Machine	untreated	1.77417	1.22345
Mother Machine	untreated	1.77517	1.40645
Mother Machine	untreated	1.77617	1.58993
Mother Machine	untreated	1.77717	1.46944
Mother Machine	untreated	1.77817	1.16431
Mother Machine	untreated	1.77917	1.16582
Mother Machine	untreated	1.78017	1.62204
Mother Machine	untreated	1.78117	1.21649
Mother Machine	untreated	1.78217	1.35553
Mother Machine	untreated	1.78317	1.09702
Mother Machine	untreated	1.78417	1.55275
Mother Machine	untreated	1.78517	1.35777
Mother Machine	untreated	1.78617	1.17039
Mother Machine	untreated	1.78717	1.30109
Mother Machine	untreated	1.78817	1.43663
Mother Machine	untreated	1.78917	1.09299
Mother Machine	untreated	1.79017	1.289
Mother Machine	untreated	1.79117	1.50135
Mother Machine	untreated	1.79217	1.35881
Mother Machine	untreated	1.79317	1.43012
Mother Machine	untreated	1.79417	1.42641
Mother Machine	untreated	1.79517	1.21277
Mother Machine	untreated	1.79617	1.4338
Mother Machine	untreated	1.79717	1.677
Mother Machine	untreated	1.79817	1.41314
Mother Machine	untreated	1.79917	1.29092
Mother Machine	untreated	1.80017	1.79168
Mother Machine	untreated	1.80117	1.54228
Mother Machine	untreated	1.80217	1.55644
Mother Machine	untreated	1.80317	1.22193
Mother Machine	untreated	1.80417	1.29034
Mother Machine	untreated	1.80517	1.43538
Mother Machine	untreated	1.80617	1.60563
Mother Machine	untreated	1.80717	1.63044
Mother Machine	untreated	1.80817	1.29242
Mother Machine	untreated	1.80917	1.36924
Mother Machine	untreated	1.81017	1.42213
Mother Machine	untreated	1.81117	1.52993
Mother Machine	untreated	1.81217	1.41755
Mother Machine	untreated	1.81317	1.36696
Mother Machine	untreated	1.81417	1.49745
Mother Machine	untreated	1.81517	1.6208
Mother Machine	untreated	1.81617	1.55007
Mother Machine	untreated	1.81717	1.59352
Mother Machine	untreated	1.81817	1.54965
Mother Machine	untreated	1.81917	1.61778
Mother Machine	untreated	1.82017	1.87126
Mother Machine	untreated	1.82117	1.55906
Mother Machine	untreated	1.82217	1.48951
Mother Machine	untreated	1.82317	1.55296
Mother Machine	untreated	1.82417	1.408
Mother Machine	untreated	1.82517	1.30472
Mother Machine	untreated	1.82617	1.30495
Mother Machine	untreated	1.82717	1.03599
Mother Machine	untreated	1.82817	1.42651
Mother Machine	untreated	1.82917	1.55216
Mother Machine	untreated	1.83017	1.9179
Mother Machine	untreated	1.83117	1.61593
Mother Machine	untreated	1.83217	1.47639
Mother Machine	untreated	1.83317	1.42875
Mother Machine	untreated	1.83417	1.36433
Mother Machine	untreated	1.83517	1.29109
Mother Machine	untreated	1.83617	1.29191
Mother Machine	untreated	1.83717	2.05411
Mother Machine	untreated	1.83817	1.57809
Mother Machine	untreated	1.83917	1.22045
Mother Machine	untreated	1.84017	1.40291
Mother Machine	untreated	1.84117	1.36129
Mother Machine	untreated	1.84217	1.19198
Mother Machine	untreated	1.84317	1.35751
Mother Machine	untreated	1.84417	1.17461
Mother Machine	untreated	1.84517	1.23356
Mother Machine	untreated	1.84617	1.1084
Mother Machine	untreated	1.84717	1.0957
Mother Machine	untreated	1.84817	1.49704
Mother Machine	untreated	1.84917	1.16695
Mother Machine	untreated	1.85017	1.21968
Mother Machine	untreated	1.85117	1.41556
Mother Machine	untreated	1.85217	1.15168
Mother Machine	untreated	1.85317	1.28879
Mother Machine	untreated	1.85417	1.55673
Mother Machine	untreated	1.85517	1.15738
Mother Machine	untreated	1.85617	1.29612
Mother Machine	untreated	1.85717	0.773064
Mother Machine	untreated	1.85817	0.719168
Mother Machine	untreated	1.85917	1.18162
Mother Machine	untreated	1.86017	1.16605
Mother Machine	untreated	1.86117	1.1026
Mother Machine	untreated	1.86217	1.49173
Mother Machine	untreated	1.86317	1.37192
Mother Machine	untreated	1.86417	1.43899
Mother Machine	untreated	1.86517	1.31156
Mother Machine	untreated	1.86617	1.47573
Mother Machine	untreated	1.86717	1.34239
Mother Machine	untreated	1.86817	1.2263
Mother Machine	untreated	1.86917	1.1188
Mother Machine	untreated	1.87017	1.29252
Mother Machine	untreated	1.87117	1.0985
Mother Machine	untreated	1.87217	1.03475
Mother Machine	untreated	1.87317	1.36352
Mother Machine	untreated	1.87417	1.40968
Mother Machine	untreated	1.87517	1.49766
Mother Machine	untreated	1.87617	1.29944
Mother Machine	untreated	1.87717	1.2143
Mother Machine	untreated	1.87817	1.22111
Mother Machine	untreated	1.87917	1.46891
Mother Machine	untreated	1.88017	1.35429
Mother Machine	untreated	1.88117	1.235
Mother Machine	untreated	1.88217	1.4241
Mother Machine	untreated	1.88317	1.40092
Mother Machine	untreated	1.88417	1.54989
Mother Machine	untreated	1.88517	1.04166
Mother Machine	untreated	1.88617	1.46905
Mother Machine	untreated	1.88717	1.11455
Mother Machine	untreated	1.88817	0.838021
Mother Machine	untreated	1.88917	1.21404
Mother Machine	untreated	1.89017	1.29579
Mother Machine	untreated	1.89117	1.28505
Mother Machine	untreated	1.89217	1.03795
Mother Machine	untreated	1.89317	1.14947
Mother Machine	untreated	1.89417	1.24023
Mother Machine	untreated	1.89517	1.10839
Mother Machine	untreated	1.89617	1.42699
Mother Machine	untreated	1.89717	1.16785
Mother Machine	untreated	1.89817	1.74849
Mother Machine	untreated	1.89917	1.29516
Mother Machine	untreated	1.90017	1.30338
Mother Machine	untreated	1.90117	1.43615
Mother Machine	untreated	1.90217	1.3357
Mother Machine	untreated	1.90317	1.36859
Mother Machine	untreated	1.90417	1.23154
Mother Machine	untreated	1.90517	1.29876
Mother Machine	untreated	1.90617	1.43008
Mother Machine	untreated	1.90717	1.55344
Mother Machine	untreated	1.90817	0.918128
Mother Machine	untreated	1.90917	1.29854
Mother Machine	untreated	1.91017	1.42678
Mother Machine	untreated	1.91117	1.48285
Mother Machine	untreated	1.91217	1.22343
Mother Machine	untreated	1.91317	1.35243
Mother Machine	untreated	1.91417	1.43139
Mother Machine	untreated	1.91517	1.04739
Mother Machine	untreated	1.91617	1.23951
Mother Machine	untreated	1.91717	1.2378
Mother Machine	untreated	1.91817	1.21038
Mother Machine	untreated	1.91917	1.56426
Mother Machine	untreated	1.92017	1.28093
Mother Machine	untreated	1.92117	1.22731
Mother Machine	untreated	1.92217	1.31071
Mother Machine	untreated	1.92317	0.639052
Mother Machine	untreated	1.92417	1.01596
Mother Machine	untreated	1.92517	1.35365
Mother Machine	untreated	1.92617	1.56566
Mother Machine	untreated	1.92717	1.22625
Mother Machine	untreated	1.92817	1.78242
Mother Machine	untreated	1.92917	1.52034
Mother Machine	untreated	1.93017	0.975505
Mother Machine	untreated	1.93117	1.4808
Mother Machine	untreated	1.93217	1.334
Mother Machine	untreated	1.93317	1.14716
Mother Machine	untreated	1.93417	1.41877
Mother Machine	untreated	1.93517	1.78708
Mother Machine	untreated	1.93617	1.03987
Mother Machine	untreated	1.93717	1.9501
Mother Machine	untreated	1.93817	1.04292
Mother Machine	untreated	1.93917	1.42812
Mother Machine	untreated	1.94017	1.75205
Mother Machine	untreated	1.94117	1.43299
Mother Machine	untreated	1.94217	1.12019
Mother Machine	untreated	1.94317	0.929604
Mother Machine	untreated	1.94417	1.24059
Mother Machine	untreated	1.94517	1.17683
Mother Machine	untreated	1.94617	1.16893
Mother Machine	untreated	1.94717	1.36406
Mother Machine	untreated	1.94817	1.48363
Mother Machine	untreated	1.94917	1.21882
Mother Machine	untreated	1.95017	1.16571
Mother Machine	untreated	1.95117	1.28733
Mother Machine	untreated	1.95217	1.03665
Mother Machine	untreated	1.95317	1.47415
Mother Machine	untreated	1.95417	1.30611
Mother Machine	untreated	1.95517	1.22074
Mother Machine	untreated	1.95617	1.21608
Mother Machine	untreated	1.95717	0.835086
Mother Machine	untreated	1.95817	1.11632
Mother Machine	untreated	1.95917	1.43254
Mother Machine	untreated	1.96017	1.55315
Mother Machine	untreated	1.96117	1.42119
Mother Machine	untreated	1.96217	1.5416
Mother Machine	untreated	1.96317	1.22529
Mother Machine	untreated	1.96417	0.84282
Mother Machine	untreated	1.96517	1.29693
Mother Machine	untreated	1.96617	1.619
Mother Machine	untreated	1.96717	1.34966
Mother Machine	untreated	1.96817	1.22062
Mother Machine	untreated	1.96917	1.09593
Mother Machine	untreated	1.97017	1.29068
Mother Machine	untreated	1.97117	1.34781
Mother Machine	untreated	1.97217	1.23859
Mother Machine	untreated	1.97317	1.22171
Mother Machine	untreated	1.97417	1.56329
Mother Machine	untreated	1.97517	1.09242
Mother Machine	untreated	1.97617	1.2834
Mother Machine	untreated	1.97717	1.21502
Mother Machine	untreated	1.97817	1.03463
Mother Machine	untreated	1.97917	1.3001
Mother Machine	untreated	1.98017	1.16542
Mother Machine	untreated	1.98117	1.04414
Mother Machine	untreated	1.98217	1.01839
Mother Machine	untreated	1.98317	1.4165
Mother Machine	untreated	1.98417	1.29471
Mother Machine	untreated	1.98517	1.09062
Mother Machine	untreated	1.98617	1.28807
Mother Machine	untreated	1.98717	1.35358
Mother Machine	untreated	1.98817	1.22991
Mother Machine	untreated	1.98917	1.23716
Mother Machine	untreated	1.99017	1.29644
Mother Machine	untreated	1.99117	1.22084
Mother Machine	untreated	1.99217	1.03479
Mother Machine	untreated	1.99317	0.982778
Mother Machine	untreated	1.99417	1.23679
Mother Machine	untreated	1.99517	1.77219
Mother Machine	untreated	1.99617	1.039
Mother Machine	untreated	1.99717	1.357
Mother Machine	untreated	1.99817	1.43168
Mother Machine	untreated	1.99917	1.28394
Mother Machine	untreated	2.00017	1.2318
Mother Machine	untreated	2.00117	1.48836
Mother Machine	untreated	2.00217	1.36667
Mother Machine	untreated	2.00317	1.4755
Mother Machine	untreated	2.00417	1.22454
Mother Machine	untreated	2.00517	1.22503
Mother Machine	untreated	2.00617	1.30475
Mother Machine	untreated	2.00717	1.24195
Mother Machine	untreated	2.00817	1.17243
Mother Machine	untreated	2.00917	1.35595
Mother Machine	untreated	2.01017	1.53827
Mother Machine	untreated	2.01117	1.01976
Mother Machine	untreated	2.01217	0.913089
Mother Machine	untreated	2.01317	1.21975
Mother Machine	untreated	2.01417	1.08903
Mother Machine	untreated	2.01517	1.23252
Mother Machine	untreated	2.01617	1.54004
Mother Machine	untreated	2.01717	1.09039
Mother Machine	untreated	2.01817	1.05113
Mother Machine	untreated	2.01917	1.4849
Mother Machine	untreated	2.02017	1.23208
Mother Machine	untreated	2.02117	1.23929
Mother Machine	untreated	2.02217	1.4692
Mother Machine	untreated	2.02317	1.51613
Mother Machine	untreated	2.02417	1.09194
Mother Machine	untreated	2.02517	0.908778
Mother Machine	untreated	2.02617	1.41295
Mother Machine	untreated	2.02717	1.3545
Mother Machine	untreated	2.02817	0.957631
Mother Machine	untreated	2.02917	1.41866
Mother Machine	untreated	2.03017	1.03945
Mother Machine	untreated	2.03117	0.91974
Mother Machine	untreated	2.03217	1.1028
Mother Machine	untreated	2.03317	1.33473
Mother Machine	untreated	2.03417	1.34746
Mother Machine	untreated	2.03517	1.10178
Mother Machine	untreated	2.03617	1.03415
Mother Machine	untreated	2.03717	1.30519
Mother Machine	untreated	2.03817	1.28685
Mother Machine	untreated	2.03917	1.50048
Mother Machine	untreated	2.04017	1.64301
Mother Machine	untreated	2.04117	1.56025
Mother Machine	untreated	2.04217	1.39133
Mother Machine	untreated	2.04317	1.03415
Mother Machine	untreated	2.04417	1.10109
Mother Machine	untreated	2.04517	0.783186
Mother Machine	untreated	2.04617	1.29528
Mother Machine	untreated	2.04717	1.23369
Mother Machine	untreated	2.04817	1.62111
Mother Machine	untreated	2.04917	1.1575
Mother Machine	untreated	2.05017	1.48885
Mother Machine	untreated	2.05117	1.41872
Mother Machine	untreated	2.05217	1.36053
Mother Machine	untreated	2.05317	1.15847
Mother Machine	untreated	2.05417	1.59294
Mother Machine	untreated	2.05517	1.17381
Mother Machine	untreated	2.05617	1.27185
Mother Machine	untreated	2.05717	1.1649
Mother Machine	untreated	2.05817	1.31362
Mother Machine	untreated	2.05917	1.42505
Mother Machine	untreated	2.06017	1.27065
Mother Machine	untreated	2.06117	1.40161
Mother Machine	untreated	2.06217	1.41988
Mother Machine	untreated	2.06317	1.492
Mother Machine	untreated	2.06417	1.45392
Mother Machine	untreated	2.06517	1.23543
Mother Machine	untreated	2.06617	1.29632
Mother Machine	untreated	2.06717	1.48469
Mother Machine	untreated	2.06817	1.49122
Mother Machine	untreated	2.06917	1.42505
Mother Machine	untreated	2.07017	1.27065
Mother Machine	untreated	2.07117	1.40161
Mother Machine	untreated	2.07217	1.41988
Mother Machine	untreated	2.07317	1.492
Mother Machine	untreated	2.07417	1.45392
Mother Machine	untreated	2.07517	1.23543
Mother Machine	untreated	2.07617	1.29632
Mother Machine	untreated	2.07717	1.48469
Mother Machine	untreated	2.07817	1.49122
Mother Machine	untreated	2.07917	2.06565
Mother Machine	untreated	2.08017	1.64339
Mother Machine	untreated	2.08117	1.81943
Mother Machine	untreated	2.08217	1.16449
Mother Machine	untreated	2.08317	1.42623
Mother Machine	untreated	2.08417	1.23767
Mother Machine	untreated	2.08517	1.24617
Mother Machine	untreated	2.08617	1.42903
Mother Machine	untreated	2.08717	1.29564
Mother Machine	untreated	2.08817	1.36996
Mother Machine	untreated	2.08917	1.49117
Mother Machine	untreated	2.09017	1.55926
Mother Machine	untreated	2.09117	1.24146
Mother Machine	untreated	2.09217	1.16355
Mother Machine	untreated	2.09317	1.34798
Mother Machine	untreated	2.09417	1.33728
Mother Machine	untreated	2.09517	1.23373
Mother Machine	untreated	2.09617	1.40956
Mother Machine	untreated	2.09717	1.20039
Mother Machine	untreated	2.09817	1.54892
Mother Machine	untreated	2.09917	1.42203
Mother Machine	untreated	2.10017	1.27968
Mother Machine	untreated	2.10117	1.42336
Mother Machine	untreated	2.10217	1.48863
Mother Machine	untreated	2.10317	1.36108
Mother Machine	untreated	2.10417	1.80949
Mother Machine	untreated	2.10517	1.34933
Mother Machine	untreated	2.10617	1.49136
Mother Machine	untreated	2.10717	1.04082
Mother Machine	untreated	2.10817	1.54191
Mother Machine	untreated	2.10917	1.52499
Mother Machine	untreated	2.11017	1.67708
Mother Machine	untreated	2.11117	1.43191
Mother Machine	untreated	2.11217	1.20256
Mother Machine	untreated	2.11317	1.49899
Mother Machine	untreated	2.11417	1.57002
Mother Machine	untreated	2.11517	1.79555
Mother Machine	untreated	2.11617	1.6638
Mother Machine	untreated	2.11717	1.61191
Mother Machine	untreated	2.11817	1.54915
Mother Machine	untreated	2.11917	1.55994
Mother Machine	untreated	2.12017	1.24471
Mother Machine	untreated	2.12117	1.36734
Mother Machine	untreated	2.12217	1.23292
Mother Machine	untreated	2.12317	1.2942
Mother Machine	untreated	2.12417	1.14765
Mother Machine	untreated	2.12517	1.56646
Mother Machine	untreated	2.12617	1.3617
Mother Machine	untreated	2.12717	1.74827
Mother Machine	untreated	2.12817	1.2232
Mother Machine	untreated	2.12917	1.22908
Mother Machine	untreated	2.13017	1.35816
Mother Machine	untreated	2.13117	1.41372
Mother Machine	untreated	2.13217	1.39859
Mother Machine	untreated	2.13317	1.28755
Mother Machine	untreated	2.13417	1.30149
Mother Machine	untreated	2.13517	0.709841
Mother Machine	untreated	2.13617	1.10096
Mother Machine	untreated	2.13717	1.34573
Mother Machine	untreated	2.13817	1.4762
Mother Machine	untreated	2.13917	1.4246
Mother Machine	untreated	2.14017	1.22781
Mother Machine	untreated	2.14117	1.29765
Mother Machine	untreated	2.14217	1.69471
Mother Machine	untreated	2.14317	1.609
Mother Machine	untreated	2.14417	1.58594
Mother Machine	untreated	2.14517	1.58415
Mother Machine	untreated	2.14617	1.28022
Mother Machine	untreated	2.14717	1.33701
Mother Machine	untreated	2.14817	1.36244
Mother Machine	untreated	2.14917	1.88368
Mother Machine	untreated	2.15017	1.66998
Mother Machine	untreated	2.15117	1.36454
Mother Machine	untreated	2.15217	1.15898
Mother Machine	untreated	2.15317	1.3553
Mother Machine	untreated	2.15417	1.29949
Mother Machine	untreated	2.15517	1.21686
Mother Machine	untreated	2.15617	1.34757
Mother Machine	untreated	2.15717	1.48624
Mother Machine	untreated	2.15817	1.53994
Mother Machine	untreated	2.15917	1.23468
Mother Machine	untreated	2.16017	1.40101
Mother Machine	untreated	2.16117	1.42919
Mother Machine	untreated	2.16217	1.28327
Mother Machine	untreated	2.16317	1.34518
Mother Machine	untreated	2.16417	1.36593
Mother Machine	untreated	2.16517	1.46038
Mother Machine	untreated	2.16617	1.67843
Mother Machine	untreated	2.16717	1.61029
Mother Machine	untreated	2.16817	1.4857
Mother Machine	untreated	2.16917	1.35231
Mother Machine	untreated	2.17017	1.6109
Mother Machine	untreated	2.17117	1.42307
Mother Machine	untreated	2.17217	1.81639
Mother Machine	untreated	2.17317	1.34756
Mother Machine	untreated	2.17417	1.54175
Mother Machine	untreated	2.17517	1.49383
Mother Machine	untreated	2.17617	1.65648
Mother Machine	untreated	2.17717	1.34163
Mother Machine	untreated	2.17817	1.5021
Mother Machine	untreated	2.17917	1.55603
Mother Machine	untreated	2.18017	1.41664
Mother Machine	untreated	2.18117	1.28044
Mother Machine	untreated	2.18217	1.16969
Mother Machine	untreated	2.18317	1.15707
Mother Machine	untreated	2.18417	1.26147
Mother Machine	untreated	2.18517	1.42323
Mother Machine	untreated	2.18617	1.56116
Mother Machine	untreated	2.18717	1.21179
Mother Machine	untreated	2.18817	1.29891
Mother Machine	untreated	2.18917	1.53048
Mother Machine	untreated	2.19017	1.2122
Mother Machine	untreated	2.19117	1.79133
Mother Machine	untreated	2.19217	1.74538
Mother Machine	untreated	2.19317	1.48074
Mother Machine	untreated	2.19417	1.58354
Mother Machine	untreated	2.19517	1.08368
Mother Machine	untreated	2.19617	1.39079
Mother Machine	untreated	2.19717	1.26581
Mother Machine	untreated	2.19817	1.34971
Mother Machine	untreated	2.19917	1.16283
Mother Machine	untreated	2.20017	1.21858
Mother Machine	untreated	2.20117	1.43141
Mother Machine	untreated	2.20217	1.29955
Mother Machine	untreated	2.20317	1.40962
Mother Machine	untreated	2.20417	1.03759
Mother Machine	untreated	2.20517	1.0223
Mother Machine	untreated	2.20617	1.21316
Mother Machine	untreated	2.20717	1.68025
Mother Machine	untreated	2.20817	1.62337
Mother Machine	untreated	2.20917	1.40401
Mother Machine	untreated	2.21017	1.7475
Mother Machine	untreated	2.21117	1.81108
Mother Machine	untreated	2.21217	1.8464
Mother Machine	untreated	2.21317	1.50019
Mother Machine	untreated	2.21417	1.51153
Mother Machine	untreated	2.21517	1.52308
Mother Machine	untreated	2.21617	1.78496
Mother Machine	untreated	2.21717	1.42131
Mother Machine	untreated	2.21817	1.4801
Mother Machine	untreated	2.21917	1.4254
Mother Machine	untreated	2.22017	1.34348
Mother Machine	untreated	2.22117	1.41721
Mother Machine	untreated	2.22217	1.30378
Mother Machine	untreated	2.22317	1.16046
Mother Machine	untreated	2.22417	1.36825
Mother Machine	untreated	2.22517	1.47442
Mother Machine	untreated	2.22617	1.29639
Mother Machine	untreated	2.22717	1.10736
Mother Machine	untreated	2.22817	1.41164
Mother Machine	untreated	2.22917	1.80946
Mother Machine	untreated	2.23017	1.34426
Mother Machine	untreated	2.23117	1.23098
Mother Machine	untreated	2.23217	1.48788
Mother Machine	untreated	2.23317	1.34561
Mother Machine	untreated	2.23417	1.62073
Mother Machine	untreated	2.23517	1.49289
Mother Machine	untreated	2.23617	1.56441
Mother Machine	untreated	2.23717	1.98601
Mother Machine	untreated	2.23817	1.29041
Mother Machine	untreated	2.23917	1.41434
Mother Machine	untreated	2.24017	1.55359
Mother Machine	untreated	2.24117	1.35416
Mother Machine	untreated	2.24217	1.56173
Mother Machine	untreated	2.24317	1.23142
Mother Machine	untreated	2.24417	1.28661
Mother Machine	untreated	2.24517	1.36007
Mother Machine	untreated	2.24617	1.54466
Mother Machine	untreated	2.24717	1.29437
Mother Machine	untreated	2.24817	1.4892
Mother Machine	untreated	2.24917	1.6154
Mother Machine	untreated	2.25017	1.28474
Mother Machine	untreated	2.25117	1.40052
Mother Machine	untreated	2.25217	1.5986
Mother Machine	untreated	2.25317	1.36889
Mother Machine	untreated	2.25417	1.55038
Mother Machine	untreated	2.25517	1.35648
Mother Machine	untreated	2.25617	1.85796
Mother Machine	untreated	2.25717	1.81631
Mother Machine	untreated	2.25817	1.53789
Mother Machine	untreated	2.25917	1.41024
Mother Machine	untreated	2.26017	1.97766
Mother Machine	untreated	2.26117	1.22943
Mother Machine	untreated	2.26217	1.22366
Mother Machine	untreated	2.26317	1.62356
Mother Machine	untreated	2.26417	1.29516
Mother Machine	untreated	2.26517	1.17626
Mother Machine	untreated	2.26617	1.75153
Mother Machine	untreated	2.26717	1.4959
Mother Machine	untreated	2.26817	1.28242
Mother Machine	untreated	2.26917	1.28142
Mother Machine	untreated	2.27017	1.16018
Mother Machine	untreated	2.27117	1.47245
Mother Machine	untreated	2.27217	1.54305
Mother Machine	untreated	2.27317	1.62184
Mother Machine	untreated	2.27417	1.16946
Mother Machine	untreated	2.27517	1.4277
Mother Machine	untreated	2.27617	1.17184
Mother Machine	untreated	2.27717	1.40248
Mother Machine	untreated	2.27817	1.09447
Mother Machine	untreated	2.27917	1.09884
Mother Machine	untreated	2.28017	1.30151
Mother Machine	untreated	2.28117	1.24128
Mother Machine	untreated	2.28217	1.41848
Mother Machine	untreated	2.28317	1.54297
Mother Machine	untreated	2.28417	0.771024
Mother Machine	untreated	2.28517	1.79269
Mother Machine	untreated	2.28617	1.55933
Mother Machine	untreated	2.28717	1.30196
Mother Machine	untreated	2.28817	1.28871
Mother Machine	untreated	2.28917	1.27936
Mother Machine	untreated	2.29017	1.29456
Mother Machine	untreated	2.29117	1.28917
Mother Machine	untreated	2.29217	1.1009
Mother Machine	untreated	2.29317	1.15566
Mother Machine	untreated	2.29417	1.04963
Mother Machine	untreated	2.29517	1.54867
Mother Machine	untreated	2.29617	1.09359
Mother Machine	untreated	2.29717	1.66669
Mother Machine	untreated	2.29817	1.16377
Mother Machine	untreated	2.29917	1.93827
Mother Machine	untreated	2.30017	1.10776
Mother Machine	untreated	2.30117	0.782505
Mother Machine	untreated	2.30217	1.44782
Mother Machine	untreated	2.30317	1.0972
Mother Machine	untreated	2.30417	1.422
Mother Machine	untreated	2.30517	1.22542
Mother Machine	untreated	2.30617	1.09799
Mother Machine	untreated	2.30717	1.20952
Mother Machine	untreated	2.30817	1.03298
Mother Machine	untreated	2.30917	1.53587
Mother Machine	untreated	2.31017	1.54634
Mother Machine	untreated	2.31117	1.16738
Mother Machine	untreated	2.31217	1.17256
Mother Machine	untreated	2.31317	1.26565
Mother Machine	untreated	2.31417	1.04213
Mother Machine	untreated	2.31517	1.35377
Mother Machine	untreated	2.31617	1.15976
Mother Machine	untreated	2.31717	1.35635
Mother Machine	untreated	2.31817	1.17741
Mother Machine	untreated	2.31917	1.15299
Mother Machine	untreated	2.32017	0.73148
Mother Machine	untreated	2.32117	1.22663
Mother Machine	untreated	2.32217	1.34541
Mother Machine	untreated	2.32317	1.21854
Mother Machine	untreated	2.32417	1.29396
Mother Machine	untreated	2.32517	1.28806
Mother Machine	untreated	2.32617	1.29035
Mother Machine	untreated	2.32717	1.23346
Mother Machine	untreated	2.32817	1.493
Mother Machine	untreated	2.32917	1.30892
Mother Machine	untreated	2.33017	1.10394
Mother Machine	untreated	2.33117	1.10342
Mother Machine	untreated	2.33217	1.15422
Mother Machine	untreated	2.33317	1.21219
Mother Machine	untreated	2.33417	1.02706
Mother Machine	untreated	2.33517	1.35948
Mother Machine	untreated	2.33617	1.48188
Mother Machine	untreated	2.33717	1.36243
Mother Machine	untreated	2.33817	1.09248
Mother Machine	untreated	2.33917	1.21669
Mother Machine	untreated	2.34017	1.49914
Mother Machine	untreated	2.34117	1.52871
Mother Machine	untreated	2.34217	1.55077
Mother Machine	untreated	2.34317	1.39806
Mother Machine	untreated	2.34417	1.54027
Mother Machine	untreated	2.34517	1.34033
Mother Machine	untreated	2.34617	1.61476
Mother Machine	untreated	2.34717	1.41594
Mother Machine	untreated	2.34817	1.75441
Mother Machine	untreated	2.34917	0.917139
Mother Machine	untreated	2.35017	1.22704
Mother Machine	untreated	2.35117	1.55499
Mother Machine	untreated	2.35217	1.28667
Mother Machine	untreated	2.35317	1.61927
Mother Machine	untreated	2.35417	1.53777
Mother Machine	untreated	2.35517	1.55453
Mother Machine	untreated	2.35617	0.84068
Mother Machine	untreated	2.35717	0.971733
Mother Machine	untreated	2.35817	1.41935
Mother Machine	untreated	2.35917	1.29008
Mother Machine	untreated	2.36017	1.29636
Mother Machine	untreated	2.36117	1.41889
Mother Machine	untreated	2.36217	1.35806
Mother Machine	untreated	2.36317	1.15416
Mother Machine	untreated	2.36417	1.55974
Mother Machine	untreated	2.36517	1.54372
Mother Machine	untreated	2.36617	1.28276
Mother Machine	untreated	2.36717	1.02798
Mother Machine	untreated	2.36817	1.36294
Mother Machine	untreated	2.36917	1.16385
Mother Machine	untreated	2.37017	1.68253
Mother Machine	untreated	2.37117	1.3703
Mother Machine	untreated	2.37217	1.03067
Mother Machine	untreated	2.37317	1.62447
Mother Machine	untreated	2.37417	1.55426
Mother Machine	untreated	2.37517	1.28746
Mother Machine	untreated	2.37617	1.16868
Mother Machine	untreated	2.37717	1.22609
Mother Machine	untreated	2.37817	1.35885
Mother Machine	untreated	2.37917	1.66641
Mother Machine	untreated	2.38017	2.19254
Mother Machine	untreated	2.38117	1.42893
Mother Machine	untreated	2.38217	1.29721
Mother Machine	untreated	2.38317	1.11049
Mother Machine	untreated	2.38417	1.03554
Mother Machine	untreated	2.38517	1.49551
Mother Machine	untreated	2.38617	1.42788
Mother Machine	untreated	2.38717	1.03796
Mother Machine	untreated	2.38817	1.53706
Mother Machine	untreated	2.38917	1.2182
Mother Machine	untreated	2.39017	1.80372
Mother Machine	untreated	2.39117	1.21673
Mother Machine	untreated	2.39217	1.27505
Mother Machine	untreated	2.39317	1.48039
Mother Machine	untreated	2.39417	1.93935
Mother Machine	untreated	2.39517	1.41471
Mother Machine	untreated	2.39617	1.43352
Mother Machine	untreated	2.39717	1.3007
Mother Machine	untreated	2.39817	1.50266
Mother Machine	untreated	2.39917	1.60861
Mother Machine	untreated	2.40017	1.8047
Mother Machine	untreated	2.40117	1.81674
Mother Machine	untreated	2.40217	1.59083
Mother Machine	untreated	2.40317	1.63688
Mother Machine	untreated	2.40417	1.20277
Mother Machine	untreated	2.40517	1.93453
Mother Machine	untreated	2.40617	1.54379
Mother Machine	untreated	2.40717	1.61526
Mother Machine	untreated	2.40817	1.65204
Mother Machine	untreated	2.40917	1.3713
Mother Machine	untreated	2.41017	1.22537
Mother Machine	untreated	2.41117	1.66463
Mother Machine	untreated	2.41217	1.48901
Mother Machine	untreated	2.41317	1.56271
Mother Machine	untreated	2.41417	1.50263
Mother Machine	untreated	2.41517	1.5969
Mother Machine	untreated	2.41617	1.62431
Mother Machine	untreated	2.41717	1.60861
Mother Machine	untreated	2.41817	1.8047
Mother Machine	untreated	2.41917	1.81674
Mother Machine	untreated	2.42017	1.59083
Mother Machine	untreated	2.42117	1.63688
Mother Machine	untreated	2.42217	1.20277
Mother Machine	untreated	2.42317	1.93453
Mother Machine	untreated	2.42417	1.54379
Mother Machine	untreated	2.42517	1.61526
Mother Machine	untreated	2.42617	1.65204
Mother Machine	untreated	2.42717	1.3713
Mother Machine	untreated	2.42817	1.22537
Mother Machine	untreated	2.42917	1.66463
Mother Machine	untreated	2.43017	1.48901
Mother Machine	untreated	2.43117	1.56271
Mother Machine	untreated	2.43217	1.50263
Mother Machine	untreated	2.43317	1.5969
Mother Machine	untreated	2.43417	1.62431
Mother Machine	untreated	2.43517	1.48818
Mother Machine	untreated	2.43617	1.22786
Mother Machine	untreated	2.43717	1.47234
Mother Machine	untreated	2.43817	1.85736
Mother Machine	untreated	2.43917	1.55607
Mother Machine	untreated	2.44017	1.55563
Mother Machine	untreated	2.44117	1.68943
Mother Machine	untreated	2.44217	1.63074
Mother Machine	untreated	2.44317	1.2879
Mother Machine	untreated	2.44417	1.48791
Mother Machine	untreated	2.44517	1.35801
Mother Machine	untreated	2.44617	1.54523
Mother Machine	untreated	2.44717	1.69138
Mother Machine	untreated	2.44817	1.41489
Mother Machine	untreated	2.44917	1.46657
Mother Machine	untreated	2.45017	1.93341
Mother Machine	untreated	2.45117	1.43734
Mother Machine	untreated	2.45217	1.61967
Mother Machine	untreated	2.45317	1.62713
Mother Machine	untreated	2.45417	1.55112
Mother Machine	untreated	2.45517	1.82415
Mother Machine	untreated	2.45617	1.17809
Mother Machine	untreated	2.45717	1.65985
Mother Machine	untreated	2.45817	1.6561
Mother Machine	untreated	2.45917	1.54467
Mother Machine	untreated	2.46017	1.73742
Mother Machine	untreated	2.46117	1.58857
Mother Machine	untreated	2.46217	1.42816
Mother Machine	untreated	2.46317	1.23462
Mother Machine	untreated	2.46417	1.49616
Mother Machine	untreated	2.46517	1.55981
Mother Machine	untreated	2.46617	1.09349
Mother Machine	untreated	2.46717	1.61283
Mother Machine	untreated	2.46817	1.17125
Mother Machine	untreated	2.46917	1.54104
Mother Machine	untreated	2.47017	1.54533
Mother Machine	untreated	2.47117	1.42998
Mother Machine	untreated	2.47217	1.35614
Mother Machine	untreated	2.47317	1.43192
Mother Machine	untreated	2.47417	1.55087
Mother Machine	untreated	2.47517	1.62351
Mother Machine	untreated	2.47617	1.54264
Mother Machine	untreated	2.47717	1.34968
Mother Machine	untreated	2.47817	1.27798
Mother Machine	untreated	2.47917	1.53417
Mother Machine	untreated	2.48017	1.43372
Mother Machine	untreated	2.48117	1.22019
Mother Machine	untreated	2.48217	1.22033
Mother Machine	untreated	2.48317	1.55994
Mother Machine	untreated	2.48417	0.955774
Mother Machine	untreated	2.48517	1.03442
Mother Machine	untreated	2.48617	1.61343
Mother Machine	untreated	2.48717	1.48161
Mother Machine	untreated	2.48817	1.3661
Mother Machine	untreated	2.48917	1.22453
Mother Machine	untreated	2.49017	1.34696
Mother Machine	untreated	2.49117	1.23408
Mother Machine	untreated	2.49217	1.54115
Mother Machine	untreated	2.49317	1.50076
Mother Machine	untreated	2.49417	1.47006
Mother Machine	untreated	2.49517	1.48885
Mother Machine	untreated	2.49617	1.549
Mother Machine	untreated	2.49717	1.55101
Mother Machine	untreated	2.49817	1.42531
Mother Machine	untreated	2.49917	1.73038
Mother Machine	untreated	2.50017	1.60778
Mother Machine	untreated	2.50117	1.22888
Mother Machine	untreated	2.50217	1.59968
Mother Machine	untreated	2.50317	1.54216
Mother Machine	untreated	2.50417	1.43705
Mother Machine	untreated	2.50517	1.68122
Mother Machine	untreated	2.50617	1.61479
Mother Machine	untreated	2.50717	1.55617
Mother Machine	untreated	2.50817	1.62138
Mother Machine	untreated	2.50917	1.43051
Mother Machine	untreated	2.51017	1.36871
Mother Machine	untreated	2.51117	1.48515
Mother Machine	untreated	2.51217	1.16255
Mother Machine	untreated	2.51317	1.48137
Mother Machine	untreated	2.51417	1.10745
Mother Machine	untreated	2.51517	1.17199
Mother Machine	untreated	2.51617	1.23722
Mother Machine	untreated	2.51717	1.3475
Mother Machine	untreated	2.51817	1.35538
Mother Machine	untreated	2.51917	1.6166
Mother Machine	untreated	2.52017	1.29533
Mother Machine	untreated	2.52117	1.50589
Mother Machine	untreated	2.52217	1.50066
Mother Machine	untreated	2.52317	1.22091
Mother Machine	untreated	2.52417	1.02951
Mother Machine	untreated	2.52517	0.905754
Mother Machine	untreated	2.52617	1.55889
Mother Machine	untreated	2.52717	1.55329
Mother Machine	untreated	2.52817	1.41542
Mother Machine	untreated	2.52917	1.14618
Mother Machine	untreated	2.53017	1.23342
Mother Machine	untreated	2.53117	1.35101
Mother Machine	untreated	2.53217	1.43191
Mother Machine	untreated	2.53317	1.28243
Mother Machine	untreated	2.53417	1.34285
Mother Machine	untreated	2.53517	1.14773
Mother Machine	untreated	2.53617	1.34667
Mother Machine	untreated	2.53717	1.20061
Mother Machine	untreated	2.53817	1.30058
Mother Machine	untreated	2.53917	1.30929
Mother Machine	untreated	2.54017	1.2924
Mother Machine	untreated	2.54117	1.41169
Mother Machine	untreated	2.54217	1.36448
Mother Machine	untreated	2.54317	1.30162
Mother Machine	untreated	2.54417	1.73797
Mother Machine	untreated	2.54517	1.3651
Mother Machine	untreated	2.54617	1.41406
Mother Machine	untreated	2.54717	1.48646
Mother Machine	untreated	2.54817	1.53341
Mother Machine	untreated	2.54917	1.31618
Mother Machine	untreated	2.55017	1.54415
Mother Machine	untreated	2.55117	1.16699
Mother Machine	untreated	2.55217	1.29795
Mother Machine	untreated	2.55317	1.34855
Mother Machine	untreated	2.55417	1.53783
Mother Machine	untreated	2.55517	1.22628
Mother Machine	untreated	2.55617	1.27177
Mother Machine	untreated	2.55717	1.53897
Mother Machine	untreated	2.55817	1.34851
Mother Machine	untreated	2.55917	1.2906
Mother Machine	untreated	2.56017	1.54306
Mother Machine	untreated	2.56117	1.10692
Mother Machine	untreated	2.56217	0.907548
Mother Machine	untreated	2.56317	1.30088
Mother Machine	untreated	2.56417	1.22333
Mother Machine	untreated	2.56517	1.28221
Mother Machine	untreated	2.56617	1.85907
Mother Machine	untreated	2.56717	1.22269
Mother Machine	untreated	2.56817	0.991455
Mother Machine	untreated	2.56917	1.62217
Mother Machine	untreated	2.57017	1.61436
Mother Machine	untreated	2.57117	1.80819
Mother Machine	untreated	2.57217	1.62184
Mother Machine	untreated	2.57317	1.42366
Mother Machine	untreated	2.57417	0.912446
Mother Machine	untreated	2.57517	1.23451
Mother Machine	untreated	2.57617	1.36137
Mother Machine	untreated	2.57717	1.27538
Mother Machine	untreated	2.57817	1.22978
Mother Machine	untreated	2.57917	1.33945
Mother Machine	untreated	2.58017	1.17877
Mother Machine	untreated	2.58117	1.14902
Mother Machine	untreated	2.58217	1.61568
Mother Machine	untreated	2.58317	1.29546
Mother Machine	untreated	2.58417	1.54486
Mother Machine	untreated	2.58517	1.41919
Mother Machine	untreated	2.58617	1.42032
Mother Machine	untreated	2.58717	1.20755
Mother Machine	untreated	2.58817	1.35526
Mother Machine	untreated	2.58917	1.47729
Mother Machine	untreated	2.59017	1.41784
Mother Machine	untreated	2.59117	1.53535
Mother Machine	untreated	2.59217	1.16762
Mother Machine	untreated	2.59317	1.17658
Mother Machine	untreated	2.59417	1.21666
Mother Machine	untreated	2.59517	1.17008
Mother Machine	untreated	2.59617	1.33741
Mother Machine	untreated	2.59717	1.31031
Mother Machine	untreated	2.59817	1.16176
Mother Machine	untreated	2.59917	1.74128
Mother Machine	untreated	2.60017	1.28471
Mother Machine	untreated	2.60117	1.43201
Mother Machine	untreated	2.60217	1.30218
Mother Machine	untreated	2.60317	1.10119
Mother Machine	untreated	2.60417	1.27209
Mother Machine	untreated	2.60517	1.35064
Mother Machine	untreated	2.60617	1.48966
Mother Machine	untreated	2.60717	0.969648
Mother Machine	untreated	2.60817	1.14347
Mother Machine	untreated	2.60917	1.1653
Mother Machine	untreated	2.61017	1.22371
Mother Machine	untreated	2.61117	1.59491
Mother Machine	untreated	2.61217	1.73821
Mother Machine	untreated	2.61317	1.09204
Mother Machine	untreated	2.61417	1.29583
Mother Machine	untreated	2.61517	1.24083
Mother Machine	untreated	2.61617	1.0978
Mother Machine	untreated	2.61717	1.34678
Mother Machine	untreated	2.61817	1.45513
Mother Machine	untreated	2.61917	1.35772
Mother Machine	untreated	2.62017	1.28821
Mother Machine	untreated	2.62117	1.37547
Mother Machine	untreated	2.62217	1.22977
Mother Machine	untreated	2.62317	1.54694
Mother Machine	untreated	2.62417	1.28491
Mother Machine	untreated	2.62517	1.36049
Mother Machine	untreated	2.62617	0.971164
Mother Machine	untreated	2.62717	1.15522
Mother Machine	untreated	2.62817	1.09212
Mother Machine	untreated	2.62917	1.35112
Mother Machine	untreated	2.63017	1.53609
Mother Machine	untreated	2.63117	1.91985
Mother Machine	untreated	2.63217	1.04976
Mother Machine	untreated	2.63317	1.16629
Mother Machine	untreated	2.63417	1.1702
Mother Machine	untreated	2.63517	1.29016
Mother Machine	untreated	2.63617	1.41227
Mother Machine	untreated	2.63717	1.56316
Mother Machine	untreated	2.63817	0.77228
Mother Machine	untreated	2.63917	1.02243
Mother Machine	untreated	2.64017	1.42908
Mother Machine	untreated	2.64117	1.59927
Mother Machine	untreated	2.64217	0.9745
Mother Machine	untreated	2.64317	1.55225
Mother Machine	untreated	2.64417	1.54348
Mother Machine	untreated	2.64517	1.28729
Mother Machine	untreated	2.64617	1.23628
Mother Machine	untreated	2.64717	1.29966
Mother Machine	untreated	2.64817	1.23973
Mother Machine	untreated	2.64917	1.47874
Mother Machine	untreated	2.65017	1.57648
Mother Machine	untreated	2.65117	1.49009
Mother Machine	untreated	2.65217	1.23767
Mother Machine	untreated	2.65317	1.29074
Mother Machine	untreated	2.65417	1.43272
Mother Machine	untreated	2.65517	1.35798
Mother Machine	untreated	2.65617	1.11401
Mother Machine	untreated	2.65717	1.7461
Mother Machine	untreated	2.65817	0.911628
Mother Machine	untreated	2.65917	1.40043
Mother Machine	untreated	2.66017	1.59937
Mother Machine	untreated	2.66117	1.29602
Mother Machine	untreated	2.66217	0.839416
Mother Machine	untreated	2.66317	1.16263
Mother Machine	untreated	2.66417	1.69251
Mother Machine	untreated	2.66517	1.67731
Mother Machine	untreated	2.66617	1.47991
Mother Machine	untreated	2.66717	1.36292
Mother Machine	untreated	2.66817	1.16263
Mother Machine	untreated	2.66917	1.69251
Mother Machine	untreated	2.67017	1.67731
Mother Machine	untreated	2.67117	1.47991
Mother Machine	untreated	2.67217	1.36292
Mother Machine	untreated	2.67317	1.55167
Mother Machine	untreated	2.67417	1.28581
Mother Machine	untreated	2.67517	1.87903
Mother Machine	untreated	2.67617	1.41657
Mother Machine	untreated	2.67717	1.32282
Mother Machine	untreated	2.67817	1.30219
Mother Machine	untreated	2.67917	1.29668
Mother Machine	untreated	2.68017	1.34944
Mother Machine	untreated	2.68117	1.23585
Mother Machine	untreated	2.68217	1.55687
Mother Machine	untreated	2.68317	1.49622
Mother Machine	untreated	2.68417	1.37472
Mother Machine	untreated	2.68517	1.5536
Mother Machine	untreated	2.68617	1.21499
Mother Machine	untreated	2.68717	1.3543
Mother Machine	untreated	2.68817	1.22911
Mother Machine	untreated	2.68917	1.34673
Mother Machine	untreated	2.69017	1.67337
Mother Machine	untreated	2.69117	1.41297
Mother Machine	untreated	2.69217	1.27959
Mother Machine	untreated	2.69317	1.27791
Mother Machine	untreated	2.69417	1.66792
Mother Machine	untreated	2.69517	0.976183
Mother Machine	untreated	2.69617	1.54901
Mother Machine	untreated	2.69717	1.48181
Mother Machine	untreated	2.69817	1.54654
Mother Machine	untreated	2.69917	1.43108
Mother Machine	untreated	2.70017	1.49654
Mother Machine	untreated	2.70117	0.921364
Mother Machine	untreated	2.70217	1.14739
Mother Machine	untreated	2.70317	1.16292
Mother Machine	untreated	2.70417	1.56709
Mother Machine	untreated	2.70517	1.81937
Mother Machine	untreated	2.70617	1.47905
Mother Machine	untreated	2.70717	1.5641
Mother Machine	untreated	2.70817	1.43769
Mother Machine	untreated	2.70917	1.74161
Mother Machine	untreated	2.71017	1.1008
Mother Machine	untreated	2.71117	1.48551
Mother Machine	untreated	2.71217	1.36018
Mother Machine	untreated	2.71317	1.68772
Mother Machine	untreated	2.71417	1.41637
Mother Machine	untreated	2.71517	1.21513
Mother Machine	untreated	2.71617	1.61044
Mother Machine	untreated	2.71717	1.16226
Mother Machine	untreated	2.71817	1.29789
Mother Machine	untreated	2.71917	1.42781
Mother Machine	untreated	2.72017	1.42606
Mother Machine	untreated	2.72117	1.10373
Mother Machine	untreated	2.72217	1.16657
Mother Machine	untreated	2.72317	1.2969
Mother Machine	untreated	2.72417	1.48511
Mother Machine	untreated	2.72517	1.28936
Mother Machine	untreated	2.72617	1.53399
Mother Machine	untreated	2.72717	1.72204
Mother Machine	untreated	2.72817	1.81295
Mother Machine	untreated	2.72917	1.41897
Mother Machine	untreated	2.73017	1.22345
Mother Machine	untreated	2.73117	1.34887
Mother Machine	untreated	2.73217	1.43621
Mother Machine	untreated	2.73317	1.23548
Mother Machine	untreated	2.73417	1.61695
Mother Machine	untreated	2.73517	1.36179
Mother Machine	untreated	2.73617	1.47123
Mother Machine	untreated	2.73717	1.54514
Mother Machine	untreated	2.73817	1.17098
Mother Machine	untreated	2.73917	1.54025
Mother Machine	untreated	2.74017	1.28231
Mother Machine	untreated	2.74117	1.04149
Mother Machine	untreated	2.74217	1.30174
Mother Machine	untreated	2.74317	1.87986
Mother Machine	untreated	2.74417	1.29394
Mother Machine	untreated	2.74517	1.15477
Mother Machine	untreated	2.74617	1.47026
Mother Machine	untreated	2.74717	1.47415
Mother Machine	untreated	2.74817	1.5735
Mother Machine	untreated	2.74917	1.41787
Mother Machine	untreated	2.75017	1.35463
Mother Machine	untreated	2.75117	1.43545
Mother Machine	untreated	2.75217	1.16149
Mother Machine	untreated	2.75317	1.42599
Mother Machine	untreated	2.75417	1.28051
Mother Machine	untreated	2.75517	1.21259
Mother Machine	untreated	2.75617	1.27952
Mother Machine	untreated	2.75717	1.42502
Mother Machine	untreated	2.75817	1.20749
Mother Machine	untreated	2.75917	1.66007
Mother Machine	untreated	2.76017	1.08482
Mother Machine	untreated	2.76117	1.08974
Mother Machine	untreated	2.76217	1.10683
Mother Machine	untreated	2.76317	1.28977
Mother Machine	untreated	2.76417	1.21215
Mother Machine	untreated	2.76517	0.95514
Mother Machine	untreated	2.76617	1.16058
Mother Machine	untreated	2.76717	1.16174
Mother Machine	untreated	2.76817	1.27149
Mother Machine	untreated	2.76917	1.21521
Mother Machine	untreated	2.77017	1.2275
Mother Machine	untreated	2.77117	1.42551
Mother Machine	untreated	2.77217	1.04191
Mother Machine	untreated	2.77317	0.896687
Mother Machine	untreated	2.77417	1.20998
Mother Machine	untreated	2.77517	1.36467
Mother Machine	untreated	2.77617	1.1631
Mother Machine	untreated	2.77717	0.968724
Mother Machine	untreated	2.77817	1.34868
Mother Machine	untreated	2.77917	1.04009
Mother Machine	untreated	2.78017	1.41965
Mother Machine	untreated	2.78117	1.07883
Mother Machine	untreated	2.78217	1.29064
Mother Machine	untreated	2.78317	1.22584
Mother Machine	untreated	2.78417	1.03631
Mother Machine	untreated	2.78517	1.07832
Mother Machine	untreated	2.78617	1.36198
Mother Machine	untreated	2.78717	1.55378
Mother Machine	untreated	2.78817	1.47466
Mother Machine	untreated	2.78917	1.02843
[truncated: 3 more rows]

## Sheet: Fig3F
condition	A22 concentration	Average D period (min)	Slope CD adder
Mother Machine	0	26.1652	-0.0422525
Mother Machine	0	19.3192	-0.0355108
Mother Machine	0	19.0609	-0.232065
Mother Machine	0.25	34.9277	-0.257913
Mother Machine	0.25	20.6622	0.0444368
Mother Machine	0.25	28.3878	-0.394068
Mother Machine	0.25	35.9695	-0.349551
Mother Machine	0.5	38.2703	-0.42873
Mother Machine	0.5	70.1199	-1.17461
Mother Machine	0.5	41.4783	-0.44402
Mother Machine	0.5	37.7647	-0.370367
Mother Machine	1	88.6346	-0.694464
Mother Machine	1	74.0305	-1.24212
Mother Machine	1	44.2308	-0.594123

## Sheet: Fig3G
condition	A22 concentration	Initiation length per ori (um)	Division length (um)		A22 concentration	Initiation length per ori (um)	Division length (um)
Mother Machine	untreated	0.526629	3.6474		1 ug/mL	0.752887	2.32912
Mother Machine	untreated	0.527629	3.05898		1 ug/mL	0.752887	2.32912
Mother Machine	untreated	0.528629	2.93827		1 ug/mL	0.751805	2.28411
Mother Machine	untreated	0.529629	3.10489		1 ug/mL	0.723096	2.15226
Mother Machine	untreated	0.530629	3.36298		1 ug/mL	0.723096	2.48201
Mother Machine	untreated	0.531629	3.06653		1 ug/mL	0.722465	2.29007
Mother Machine	untreated	0.532629	3.26685		1 ug/mL	0.722465	2.54564
Mother Machine	untreated	0.533629	3.00621		1 ug/mL	0.784988	2.29213
Mother Machine	untreated	0.534629	3.19159		1 ug/mL	0.751048	2.3565
Mother Machine	untreated	0.535629	3.43158		1 ug/mL	0.755702	2.54909
Mother Machine	untreated	0.536629	2.87907		1 ug/mL	1.14669	2.15845
Mother Machine	untreated	0.537629	3.50986		1 ug/mL	0.690688	2.09497
Mother Machine	untreated	0.538629	3.38223		1 ug/mL	0.756207	2.6655
Mother Machine	untreated	0.539629	2.97911		1 ug/mL	0.756207	2.48055
Mother Machine	untreated	0.540629	3.35803		1 ug/mL	0.750597	2.61584
Mother Machine	untreated	0.541629	3.64308		1 ug/mL	0.750597	2.52464
Mother Machine	untreated	0.542629	2.86158		1 ug/mL	0.687085	2.35656
Mother Machine	untreated	0.543629	3.25566		1 ug/mL	0.687085	2.41182
Mother Machine	untreated	0.544629	3.19116		1 ug/mL	0.72061	2.9988
Mother Machine	untreated	0.545629	2.80174		1 ug/mL	0.653175	2.55839
Mother Machine	untreated	0.546629	2.81384		1 ug/mL	0.75166	2.22032
Mother Machine	untreated	0.547629	3.05365		1 ug/mL	0.976415	2.2888
Mother Machine	untreated	0.548629	2.87862		1 ug/mL	0.656537	2.22428
Mother Machine	untreated	0.549629	3.43784		1 ug/mL	0.656537	2.40065
Mother Machine	untreated	0.550629	3.12966		1 ug/mL	0.880956	2.6626
Mother Machine	untreated	0.551629	2.66621		1 ug/mL	0.980619	2.28987
Mother Machine	untreated	0.552629	3.20864		1 ug/mL	0.722723	2.22923
Mother Machine	untreated	0.553629	3.68218		1 ug/mL	0.851197	2.29634
Mother Machine	untreated	0.554629	3.31432		1 ug/mL	0.851197	2.28555
Mother Machine	untreated	0.555629	3.51171		1 ug/mL	0.785743	2.4143
Mother Machine	untreated	0.556629	3.31869		1 ug/mL	0.785743	2.26973
Mother Machine	untreated	0.557629	3.0555		1 ug/mL	0.751111	2.08952
Mother Machine	untreated	0.558629	3.18272		1 ug/mL	0.751111	2.60839
Mother Machine	untreated	0.559629	2.74357		1 ug/mL	0.849177	2.22065
Mother Machine	untreated	0.560629	3.5218		1 ug/mL	0.849177	2.10172
Mother Machine	untreated	0.561629	3.05293		1 ug/mL	0.911971	2.42168
Mother Machine	untreated	0.562629	3.0778		1 ug/mL	0.753018	2.02456
Mother Machine	untreated	0.563629	3.05946		1 ug/mL	0.817268	2.08856
Mother Machine	untreated	0.564629	3.43195		1 ug/mL	0.71954	2.45911
Mother Machine	untreated	0.565629	2.87814		1 ug/mL	0.71954	2.5419
Mother Machine	untreated	0.566629	3.05352		1 ug/mL	0.624286	2.46465
Mother Machine	untreated	0.567629	3.37315		1 ug/mL	0.722888	2.48415
Mother Machine	untreated	0.568629	3.26		1 ug/mL	0.914629	2.09077
Mother Machine	untreated	0.569629	2.7435		1 ug/mL	0.686743	2.67676
Mother Machine	untreated	0.570629	3.68705		1 ug/mL	0.686743	2.79489
Mother Machine	untreated	0.571629	3.00076		1 ug/mL	0.786119	2.53729
Mother Machine	untreated	0.572629	3.39871		1 ug/mL	0.786119	2.54561
Mother Machine	untreated	0.573629	3.04076		1 ug/mL	0.816355	2.41753
Mother Machine	untreated	0.574629	2.54944		1 ug/mL	0.816355	2.41753
Mother Machine	untreated	0.575629	3.3049		1 ug/mL	0.754737	2.28816
Mother Machine	untreated	0.576629	3.55837		1 ug/mL	0.752744	2.53509
Mother Machine	untreated	0.577629	2.74954		1 ug/mL	0.752744	2.41915
Mother Machine	untreated	0.578629	2.98975		1 ug/mL	0.623487	2.28629
Mother Machine	untreated	0.579629	3.12566		1 ug/mL	0.754195	2.87131
Mother Machine	untreated	0.580629	3.05866		1 ug/mL	0.754195	2.48666
Mother Machine	untreated	0.581629	3.06181		1 ug/mL	0.752825	2.61215
Mother Machine	untreated	0.582629	3.52162		1 ug/mL	0.752825	2.47979
Mother Machine	untreated	0.583629	3.25735		1 ug/mL	0.852839	2.40966
Mother Machine	untreated	0.584629	3.48997		1 ug/mL	0.752233	2.41453
Mother Machine	untreated	0.585629	2.80812		1 ug/mL	0.687074	2.55228
Mother Machine	untreated	0.586629	3.12245		1 ug/mL	0.687074	2.34967
Mother Machine	untreated	0.587629	3.24864		1 ug/mL	0.887737	2.15762
Mother Machine	untreated	0.588629	3.186		1 ug/mL	0.754238	2.35409
Mother Machine	untreated	0.589629	2.98586		1 ug/mL	0.754238	2.54145
Mother Machine	untreated	0.590629	3.19		1 ug/mL	0.785222	2.5337
Mother Machine	untreated	0.591629	3.2567		1 ug/mL	0.785705	2.417
Mother Machine	untreated	0.592629	2.93237		1 ug/mL	0.7536	2.4767
Mother Machine	untreated	0.593629	3.31261		1 ug/mL	0.719189	2.28936
Mother Machine	untreated	0.594629	3.44978		1 ug/mL	0.849968	2.35021
Mother Machine	untreated	0.595629	3.56524		1 ug/mL	0.849968	2.41379
Mother Machine	untreated	0.596629	2.91775		1 ug/mL	0.751005	2.34213
Mother Machine	untreated	0.597629	3.11804		1 ug/mL	0.979989	2.41647
Mother Machine	untreated	0.598629	2.98723		1 ug/mL	0.916307	2.68234
Mother Machine	untreated	0.599629	3.26394		1 ug/mL	0.916307	2.47809
Mother Machine	untreated	0.600629	2.73897		1 ug/mL	0.978444	2.42131
Mother Machine	untreated	0.601629	2.86722		1 ug/mL	0.978444	2.21568
Mother Machine	untreated	0.602629	2.92214		1 ug/mL	0.884114	2.21275
Mother Machine	untreated	0.603629	3.11368		1 ug/mL	0.884114	2.47409
Mother Machine	untreated	0.604629	2.99745		1 ug/mL	0.819866	2.22847
Mother Machine	untreated	0.605629	2.73557		1 ug/mL	0.786455	2.15121
Mother Machine	untreated	0.606629	3.12297		1 ug/mL	0.916403	2.55534
Mother Machine	untreated	0.607629	2.87299		1 ug/mL	0.916403	2.28286
Mother Machine	untreated	0.608629	3.18891		1 ug/mL	0.914594	2.46646
Mother Machine	untreated	0.609629	3.25277		1 ug/mL	0.914594	2.41032
Mother Machine	untreated	0.610629	2.87623		1 ug/mL	0.882246	2.74731
Mother Machine	untreated	0.611629	3.1252		1 ug/mL	0.882246	2.41376
Mother Machine	untreated	0.612629	3.31343		1 ug/mL	0.948741	2.48025
Mother Machine	untreated	0.613629	3.11021		1 ug/mL	0.948741	2.15751
Mother Machine	untreated	0.614629	3.18967		1 ug/mL	0.755812	2.55331
Mother Machine	untreated	0.615629	3.06872		1 ug/mL	0.784942	2.28579
Mother Machine	untreated	0.616629	2.86511		1 ug/mL	0.784942	2.352
Mother Machine	untreated	0.617629	3.12505		1 ug/mL	1.01747	2.41671
Mother Machine	untreated	0.618629	3.1252		1 ug/mL	1.01747	2.34786
Mother Machine	untreated	0.619629	3.31343		1 ug/mL	1.07637	2.41537
Mother Machine	untreated	0.620629	3.11021		1 ug/mL	1.07637	2.22332
Mother Machine	untreated	0.621629	3.18967		1 ug/mL	1.00998	2.21425
Mother Machine	untreated	0.622629	3.06872		1 ug/mL	0.948406	2.20804
Mother Machine	untreated	0.623629	2.86511		1 ug/mL	0.784204	2.41856
Mother Machine	untreated	0.624629	3.12505		1 ug/mL	0.784204	2.53276
Mother Machine	untreated	0.625629	2.8088		1 ug/mL	0.818546	2.21972
Mother Machine	untreated	0.626629	3.18735		1 ug/mL	0.915052	2.40015
Mother Machine	untreated	0.627629	3.32063		1 ug/mL	0.915052	2.34744
Mother Machine	untreated	0.628629	3.11925		1 ug/mL	0.945818	2.61739
Mother Machine	untreated	0.629629	3.12422		1 ug/mL	0.848891	2.15467
Mother Machine	untreated	0.630629	2.98427		1 ug/mL	0.848891	2.42613
Mother Machine	untreated	0.631629	2.93381		1 ug/mL	0.881677	2.41566
Mother Machine	untreated	0.632629	3.01602		1 ug/mL	0.686773	2.5455
Mother Machine	untreated	0.633629	3.31983		1 ug/mL	0.78784	2.41388
Mother Machine	untreated	0.634629	2.94113		1 ug/mL	0.722746	2.65978
Mother Machine	untreated	0.635629	3.38874		1 ug/mL	0.722746	2.67455
Mother Machine	untreated	0.636629	3.13445		1 ug/mL	0.754691	2.6069
Mother Machine	untreated	0.637629	3.56465		1 ug/mL	0.788612	2.35183
Mother Machine	untreated	0.638629	2.98314		1 ug/mL	1.44083	2.35915
Mother Machine	untreated	0.639629	3.38576		1 ug/mL	0.786449	2.55227
Mother Machine	untreated	0.640629	3.39316		1 ug/mL	1.29471	2.28103
Mother Machine	untreated	0.641629	3.23759		1 ug/mL	0.688567	2.41316
Mother Machine	untreated	0.642629	3.31973		1 ug/mL	0.816198	2.41805
Mother Machine	untreated	0.643629	3.25241		1 ug/mL	0.855189	2.4215
Mother Machine	untreated	0.644629	3.45383		1 ug/mL	0.855189	2.42416
Mother Machine	untreated	0.645629	2.93021		1 ug/mL	0.819155	2.21141
Mother Machine	untreated	0.646629	2.99678		1 ug/mL	0.787919	2.28441
Mother Machine	untreated	0.647629	3.76825		1 ug/mL	0.817751	2.28485
Mother Machine	untreated	0.648629	3.44535		1 ug/mL	0.817751	2.20748
Mother Machine	untreated	0.649629	3.26263		1 ug/mL	0.946996	2.22209
Mother Machine	untreated	0.650629	3.06321		1 ug/mL	0.914174	2.2917
Mother Machine	untreated	0.651629	3.12039		1 ug/mL	0.913963	2.27369
Mother Machine	untreated	0.652629	3.18963		1 ug/mL	0.755686	2.48683
Mother Machine	untreated	0.653629	3.00298		1 ug/mL	0.755686	2.40612
Mother Machine	untreated	0.654629	3.82262		1 ug/mL	0.786369	2.28236
Mother Machine	untreated	0.655629	3.38749		1 ug/mL	0.786369	2.47985
Mother Machine	untreated	0.656629	3.32388		1 ug/mL	0.688802	2.61132
Mother Machine	untreated	0.657629	3.13358		1 ug/mL	0.851279	2.41972
Mother Machine	untreated	0.658629	3.57518		1 ug/mL	0.851279	2.60966
Mother Machine	untreated	0.659629	3.33244		1 ug/mL	0.754464	2.0141
Mother Machine	untreated	0.660629	3.30135		1 ug/mL	0.784305	2.65337
Mother Machine	untreated	0.661629	2.74568		1 ug/mL	0.784305	2.54547
Mother Machine	untreated	0.662629	3.04513		1 ug/mL	0.8501	2.41735
Mother Machine	untreated	0.663629	2.98584		1 ug/mL	0.817832	2.48572
Mother Machine	untreated	0.664629	2.92641		1 ug/mL	0.883207	2.47808
Mother Machine	untreated	0.665629	3.013		1 ug/mL	0.883207	2.33891
Mother Machine	untreated	0.666629	3.05092		1 ug/mL	0.815707	2.28573
Mother Machine	untreated	0.667629	2.72095		1 ug/mL	0.815707	2.66965
Mother Machine	untreated	0.668629	3.3179		1 ug/mL	0.752802	2.4094
Mother Machine	untreated	0.669629	3.26311		1 ug/mL	0.944541	2.35522
Mother Machine	untreated	0.670629	2.79652		1 ug/mL	0.884737	2.15386
Mother Machine	untreated	0.671629	3.39328		1 ug/mL	0.884737	2.02511
Mother Machine	untreated	0.672629	3.20645		1 ug/mL	0.721389	2.41719
Mother Machine	untreated	0.673629	3.39806		1 ug/mL	0.721389	2.41856
Mother Machine	untreated	0.674629	3.1145		1 ug/mL	0.753164	2.41752
Mother Machine	untreated	0.675629	2.88434		1 ug/mL	0.753164	2.61313
Mother Machine	untreated	0.676629	2.92861		1 ug/mL	0.88326	2.33045
Mother Machine	untreated	0.677629	3.56441		1 ug/mL	0.88326	2.15455
Mother Machine	untreated	0.678629	3.12729		1 ug/mL	1.07551	2.34999
Mother Machine	untreated	0.679629	3.07615		1 ug/mL	1.07551	2.28252
Mother Machine	untreated	0.680629	2.87837		1 ug/mL	0.752823	2.4849
Mother Machine	untreated	0.681629	2.99206		1 ug/mL	0.752823	2.16453
Mother Machine	untreated	0.682629	3.37514		1 ug/mL	0.753413	2.1565
Mother Machine	untreated	0.683629	2.92013		1 ug/mL	0.752753	3.00291
Mother Machine	untreated	0.684629	3.52093		1 ug/mL	0.752753	2.48326
Mother Machine	untreated	0.685629	2.9265		1 ug/mL	0.753189	2.86546
Mother Machine	untreated	0.686629	2.92088		1 ug/mL	0.947721	2.35012
Mother Machine	untreated	0.687629	3.58715		1 ug/mL	0.852272	2.53686
Mother Machine	untreated	0.688629	3.48849		1 ug/mL	0.821359	2.66747
Mother Machine	untreated	0.689629	3.3085		1 ug/mL	0.821359	2.61495
Mother Machine	untreated	0.690629	3.3776		1 ug/mL	0.849346	2.61755
Mother Machine	untreated	0.691629	3.30756		1 ug/mL	0.849346	2.6803
Mother Machine	untreated	0.692629	3.0723		1 ug/mL	0.816731	2.65734
Mother Machine	untreated	0.693629	3.37025		1 ug/mL	0.882107	2.87313
Mother Machine	untreated	0.694629	3.12931		1 ug/mL	0.947539	2.53159
Mother Machine	untreated	0.695629	3.43823		1 ug/mL	0.818235	2.42161
Mother Machine	untreated	0.696629	3.83031		1 ug/mL	0.818235	2.9404
Mother Machine	untreated	0.697629	3.46125		1 ug/mL	0.820691	2.59716
Mother Machine	untreated	0.698629	3.00326		1 ug/mL	0.820691	2.41392
Mother Machine	untreated	0.699629	3.23029		1 ug/mL	0.721267	2.66015
Mother Machine	untreated	0.700629	3.20039		1 ug/mL	0.721267	2.55125
Mother Machine	untreated	0.701629	3.50827		1 ug/mL	0.882452	2.48123
Mother Machine	untreated	0.702629	3.2294		1 ug/mL	0.882452	2.34824
Mother Machine	untreated	0.703629	3.39074		1 ug/mL	0.656385	2.29657
Mother Machine	untreated	0.704629	3.25977		1 ug/mL	0.850441	2.1552
Mother Machine	untreated	0.705629	2.80027		1 ug/mL	0.948664	2.3503
Mother Machine	untreated	0.706629	3.1971		1 ug/mL	0.948664	2.28171
Mother Machine	untreated	0.707629	3.61964		1 ug/mL	0.752454	2.60793
Mother Machine	untreated	0.708629	3.63681		1 ug/mL	0.753388	2.34838
Mother Machine	untreated	0.709629	3.12583		1 ug/mL	0.784225	2.55004
Mother Machine	untreated	0.710629	3.07629		1 ug/mL	0.882106	2.51247
Mother Machine	untreated	0.711629	3.57637		1 ug/mL	0.880718	2.47794
Mother Machine	untreated	0.712629	3.18827		1 ug/mL	0.654057	2.65779
Mother Machine	untreated	0.713629	2.8757		1 ug/mL	1.1828	2.40361
Mother Machine	untreated	0.714629	3.05258		1 ug/mL	0.847359	2.53256
Mother Machine	untreated	0.715629	3.17866		1 ug/mL	0.847359	2.61169
Mother Machine	untreated	0.716629	3.38788		1 ug/mL	1.31191	2.40285
Mother Machine	untreated	0.717629	2.98261		1 ug/mL	0.785358	2.28051
Mother Machine	untreated	0.718629	3.20005		1 ug/mL	0.750274	2.2886
Mother Machine	untreated	0.719629	2.87093		1 ug/mL	0.750274	2.41544
Mother Machine	untreated	0.720629	3.78105		1 ug/mL	0.754197	2.41428
Mother Machine	untreated	0.721629	3.55336		1 ug/mL	0.754197	2.48818
Mother Machine	untreated	0.722629	2.85864		1 ug/mL	0.818304	2.35143
Mother Machine	untreated	0.723629	3.13003		1 ug/mL	0.818304	2.28455
Mother Machine	untreated	0.724629	3.07335		1 ug/mL	0.754464	2.46808
Mother Machine	untreated	0.725629	3.45382		1 ug/mL	0.754464	2.66838
Mother Machine	untreated	0.726629	3.0592		1 ug/mL	0.784728	2.48419
Mother Machine	untreated	0.727629	3.52107		1 ug/mL	0.656721	2.33998
Mother Machine	untreated	0.728629	3.4595		1 ug/mL	0.687586	2.41962
Mother Machine	untreated	0.729629	2.96962		1 ug/mL	0.656721	2.33998
Mother Machine	untreated	0.730629	3.2449		1 ug/mL	0.687586	2.41962
Mother Machine	untreated	0.731629	3.13136		1 ug/mL	0.785215	2.66424
Mother Machine	untreated	0.732629	2.67239		1 ug/mL	0.750521	2.22808
Mother Machine	untreated	0.733629	2.92954		1 ug/mL	0.750521	2.48014
Mother Machine	untreated	0.734629	2.99921		1 ug/mL	0.719962	2.15436
Mother Machine	untreated	0.735629	2.78644		1 ug/mL	0.948002	2.34874
Mother Machine	untreated	0.736629	3.18951		1 ug/mL	0.752547	2.98489
Mother Machine	untreated	0.737629	3.32206		1 ug/mL	0.785706	2.84266
Mother Machine	untreated	0.738629	2.99643		1 ug/mL	0.785706	2.70902
Mother Machine	untreated	0.739629	2.88136		1 ug/mL	0.818707	2.41976
Mother Machine	untreated	0.740629	3.18043		1 ug/mL	0.817082	2.54193
Mother Machine	untreated	0.741629	3.3708		1 ug/mL	0.817006	2.86061
Mother Machine	untreated	0.742629	2.9178		1 ug/mL	0.721027	2.29005
Mother Machine	untreated	0.743629	2.93082		1 ug/mL	0.721027	2.34631
Mother Machine	untreated	0.744629	3.18823		1 ug/mL	0.880338	2.29368
Mother Machine	untreated	0.745629	2.54716		1 ug/mL	0.622079	2.54744
Mother Machine	untreated	0.746629	3.06629		1 ug/mL	0.751059	2.59335
Mother Machine	untreated	0.747629	3.63316		1 ug/mL	0.686526	2.02603
Mother Machine	untreated	0.748629	3.51872		1 ug/mL	0.915284	2.1533
Mother Machine	untreated	0.749629	3.45946		1 ug/mL	0.915284	2.21334
Mother Machine	untreated	0.750629	3.81749		1 ug/mL	0.882469	2.0935
Mother Machine	untreated	0.751629	2.73183		1 ug/mL	0.78381	2.55053
Mother Machine	untreated	0.752629	2.94542		1 ug/mL	0.78381	2.40428
Mother Machine	untreated	0.753629	3.43023		1 ug/mL	0.789771	2.48608
Mother Machine	untreated	0.754629	3.05799		1 ug/mL	0.78381	2.55053
Mother Machine	untreated	0.755629	2.86975		1 ug/mL	0.78381	2.40428
Mother Machine	untreated	0.756629	3.05921		1 ug/mL	0.789771	2.48608
Mother Machine	untreated	0.757629	3.52001		1 ug/mL	1.01017	1.90625
Mother Machine	untreated	0.758629	2.99627		1 ug/mL	0.850008	2.22528
Mother Machine	untreated	0.759629	3.32236		1 ug/mL	0.850008	2.22508
Mother Machine	untreated	0.760629	3.30266		1 ug/mL	0.784779	2.21712
Mother Machine	untreated	0.761629	3.1023		1 ug/mL	0.722199	2.09727
Mother Machine	untreated	0.762629	3.50019		1 ug/mL	0.848645	2.47345
Mother Machine	untreated	0.763629	3.30622		1 ug/mL	0.818895	2.15585
Mother Machine	untreated	0.764629	3.44922		1 ug/mL	0.820019	2.09169
Mother Machine	untreated	0.765629	3.76047		1 ug/mL	0.687434	2.46573
Mother Machine	untreated	0.766629	3.38006		1 ug/mL	0.691293	2.15209
Mother Machine	untreated	0.767629	3.58361		1 ug/mL	0.691293	2.55178
Mother Machine	untreated	0.768629	3.32399		1 ug/mL	0.916554	2.27412
Mother Machine	untreated	0.769629	3.05368		1 ug/mL	0.816272	2.15869
Mother Machine	untreated	0.770629	2.84781		1 ug/mL	0.851435	2.66657
Mother Machine	untreated	0.771629	2.87489		1 ug/mL	0.787322	2.34779
Mother Machine	untreated	0.772629	2.93829		1 ug/mL	0.787322	2.22079
Mother Machine	untreated	0.773629	3.1376		1 ug/mL	0.752773	2.54484
Mother Machine	untreated	0.774629	2.61747		1 ug/mL	0.784861	2.58108
Mother Machine	untreated	0.775629	3.004		1 ug/mL	0.850278	2.16537
Mother Machine	untreated	0.776629	2.48071		1 ug/mL	0.752211	2.41259
Mother Machine	untreated	0.777629	2.74388		1 ug/mL	0.821078	2.53455
Mother Machine	untreated	0.778629	3.25291		1 ug/mL	0.754473	2.35451
Mother Machine	untreated	0.779629	2.61336		1 ug/mL	0.754473	2.351
Mother Machine	untreated	0.780629	2.66855		1 ug/mL	0.821447	2.4832
Mother Machine	untreated	0.781629	2.92324		1 ug/mL	0.819234	2.35455
Mother Machine	untreated	0.782629	2.80747		1 ug/mL	0.784737	2.08973
Mother Machine	untreated	0.783629	2.85979		1 ug/mL	0.913426	2.4195
Mother Machine	untreated	0.784629	2.54205		1 ug/mL	1.11924	2.38408
Mother Machine	untreated	0.785629	2.7988		1 ug/mL	0.755918	2.21735
Mother Machine	untreated	0.786629	2.93381		1 ug/mL	0.882033	2.47611
Mother Machine	untreated	0.787629	2.88063		1 ug/mL	0.819085	2.21517
Mother Machine	untreated	0.788629	2.93679		1 ug/mL	0.81898	2.21836
Mother Machine	untreated	0.789629	2.92693		1 ug/mL	0.785092	2.42898
Mother Machine	untreated	0.790629	3.24908		1 ug/mL	0.81675	2.22144
Mother Machine	untreated	0.791629	3.18553		1 ug/mL	0.850413	2.6604
Mother Machine	untreated	0.792629	3.37806		1 ug/mL	0.946502	2.52781
Mother Machine	untreated	0.793629	2.93643		1 ug/mL	0.821053	2.73514
Mother Machine	untreated	0.794629	2.98694		1 ug/mL	0.821053	2.61031
Mother Machine	untreated	0.795629	2.68349		1 ug/mL	0.849634	2.48593
Mother Machine	untreated	0.796629	3.32186		1 ug/mL	0.689763	2.40649
Mother Machine	untreated	0.797629	3.12178		1 ug/mL	0.8497	2.4821
Mother Machine	untreated	0.798629	2.7277		1 ug/mL	0.719971	2.41795
Mother Machine	untreated	0.799629	3.51291		1 ug/mL	0.851333	2.22161
Mother Machine	untreated	0.800629	3.44907		1 ug/mL	0.851333	2.74142
Mother Machine	untreated	0.801629	3.64071		1 ug/mL	0.917074	2.40683
Mother Machine	untreated	0.802629	3.50736		1 ug/mL	0.8497	2.4821
Mother Machine	untreated	0.803629	3.31703		1 ug/mL	0.719971	2.41795
Mother Machine	untreated	0.804629	3.05568		1 ug/mL	0.851333	2.22161
Mother Machine	untreated	0.805629	2.98605		1 ug/mL	0.851333	2.74142
Mother Machine	untreated	0.806629	3.381		1 ug/mL	0.917074	2.40683
Mother Machine	untreated	0.807629	3.04998		1 ug/mL	0.822879	2.22404
Mother Machine	untreated	0.808629	2.97719		1 ug/mL	0.822879	2.34926
Mother Machine	untreated	0.809629	3.06573		1 ug/mL	0.719876	2.47495
Mother Machine	untreated	0.810629	3.1787		1 ug/mL	0.719876	2.46869
Mother Machine	untreated	0.811629	2.7359		1 ug/mL	0.719853	2.28548
Mother Machine	untreated	0.812629	3.26235		1 ug/mL	0.78404	2.5356
Mother Machine	untreated	0.813629	2.73283		1 ug/mL	0.78404	2.22056
Mother Machine	untreated	0.814629	2.92339		1 ug/mL	0.815678	2.35781
Mother Machine	untreated	0.815629	2.80939		1 ug/mL	0.815678	2.80158
Mother Machine	untreated	0.816629	2.67858		1 ug/mL	0.783006	2.35167
Mother Machine	untreated	0.817629	3.00481		1 ug/mL	0.848388	2.29006
Mother Machine	untreated	0.818629	2.79866		1 ug/mL	0.753263	2.5996
Mother Machine	untreated	0.819629	2.99802		1 ug/mL	0.881415	2.38135
Mother Machine	untreated	0.820629	3.11833		1 ug/mL	0.881415	2.21399
Mother Machine	untreated	0.821629	3.12637		1 ug/mL	0.784593	2.33726
Mother Machine	untreated	0.822629	2.94238		1 ug/mL	0.786273	2.47726
Mother Machine	untreated	0.823629	2.99762		1 ug/mL	0.718452	2.48357
Mother Machine	untreated	0.824629	3.13389		1 ug/mL	0.851185	2.15475
Mother Machine	untreated	0.825629	2.80117		1 ug/mL	0.754144	2.48195
Mother Machine	untreated	0.826629	2.7455		1 ug/mL	0.754144	2.67994
Mother Machine	untreated	0.827629	2.74186		1 ug/mL	0.720155	2.46101
Mother Machine	untreated	0.828629	3.24928		1 ug/mL	0.720155	2.15379
Mother Machine	untreated	0.829629	2.73378		1 ug/mL	0.754144	2.48195
Mother Machine	untreated	0.830629	2.45731		1 ug/mL	0.754144	2.67994
Mother Machine	untreated	0.831629	3.07331		1 ug/mL	0.720155	2.46101
Mother Machine	untreated	0.832629	2.80661		1 ug/mL	0.720155	2.15379
Mother Machine	untreated	0.833629	2.87595		1 ug/mL	0.785194	2.4883
Mother Machine	untreated	0.834629	2.99531		1 ug/mL	0.750889	2.54948
Mother Machine	untreated	0.835629	3.13207		1 ug/mL	0.750889	2.55339
Mother Machine	untreated	0.836629	2.87547		1 ug/mL	0.526629	2.58428
Mother Machine	untreated	0.837629	3.06301		1 ug/mL	0.526629	2.35592
Mother Machine	untreated	0.838629	2.93415		1 ug/mL	0.71725	2.2093
Mother Machine	untreated	0.839629	3.00275		1 ug/mL	0.786171	2.67494
Mother Machine	untreated	0.840629	3.32691		1 ug/mL	0.786171	2.67648
Mother Machine	untreated	0.841629	2.71404		1 ug/mL	0.756471	2.14756
Mother Machine	untreated	0.842629	2.74417		1 ug/mL	0.820801	2.59524
Mother Machine	untreated	0.843629	2.66298		1 ug/mL	0.820801	2.54821
Mother Machine	untreated	0.844629	3.31595		1 ug/mL	0.817674	2.54378
Mother Machine	untreated	0.845629	3.2493		1 ug/mL	0.752469	2.33566
Mother Machine	untreated	0.846629	3.1223		1 ug/mL	0.848561	2.16116
Mother Machine	untreated	0.847629	2.8098		1 ug/mL	0.848561	2.54296
Mother Machine	untreated	0.848629	3.3646		1 ug/mL	0.753487	2.41098
Mother Machine	untreated	0.849629	2.99042		1 ug/mL	0.852102	1.95971
Mother Machine	untreated	0.850629	3.26154		1 ug/mL	0.817644	2.55609
Mother Machine	untreated	0.851629	3.00617		1 ug/mL	0.853007	2.41643
Mother Machine	untreated	0.852629	2.67846		1 ug/mL	0.880573	2.41109
Mother Machine	untreated	0.853629	3.32284		1 ug/mL	0.784503	2.54671
Mother Machine	untreated	0.854629	3.62781		1 ug/mL	0.784503	2.29084
Mother Machine	untreated	0.855629	3.3257		1 ug/mL	0.753332	2.22892
Mother Machine	untreated	0.856629	2.74568		1 ug/mL	0.9128	2.22277
Mother Machine	untreated	0.857629	2.72671		1 ug/mL	0.9128	2.28823
Mother Machine	untreated	0.858629	3.00272		1 ug/mL	0.849696	2.42302
Mother Machine	untreated	0.859629	3.05429		1 ug/mL	0.849696	2.54911
Mother Machine	untreated	0.860629	3.06117		1 ug/mL	0.853192	2.66532
Mother Machine	untreated	0.861629	3.37769		1 ug/mL	0.849775	2.53165
Mother Machine	untreated	0.862629	2.67636		1 ug/mL	0.787238	2.22137
Mother Machine	untreated	0.863629	3.25207		1 ug/mL	0.787238	2.15401
Mother Machine	untreated	0.864629	2.93004		1 ug/mL	0.883632	2.22424
Mother Machine	untreated	0.865629	3.06949		1 ug/mL	0.883632	2.47841
Mother Machine	untreated	0.866629	3.07273		1 ug/mL	0.687251	2.16597
Mother Machine	untreated	0.867629	3.13356		1 ug/mL	0.818093	2.34573
Mother Machine	untreated	0.868629	3.19496		1 ug/mL	0.818093	2.61919
Mother Machine	untreated	0.869629	3.06365		1 ug/mL	0.948128	2.47165
Mother Machine	untreated	0.870629	2.67687		1 ug/mL	0.948128	2.29076
Mother Machine	untreated	0.871629	2.8575		1 ug/mL	0.718366	2.20426
Mother Machine	untreated	0.872629	2.87135		1 ug/mL	0.849254	2.4189
Mother Machine	untreated	0.873629	3.18932		1 ug/mL	0.88586	2.40646
Mother Machine	untreated	0.874629	2.86489		1 ug/mL	0.752449	2.41165
Mother Machine	untreated	0.875629	2.79135		1 ug/mL	0.849214	2.34876
Mother Machine	untreated	0.876629	2.62173		1 ug/mL	0.753537	2.22786
Mother Machine	untreated	0.877629	2.7934		1 ug/mL	0.817196	2.35
Mother Machine	untreated	0.878629	3.18788		1 ug/mL	0.880425	2.39757
Mother Machine	untreated	0.879629	3.07429		1 ug/mL	0.978661	2.14973
Mother Machine	untreated	0.880629	2.92848		1 ug/mL	0.978661	2.48209
Mother Machine	untreated	0.881629	3.31944		1 ug/mL	0.819785	2.21665
Mother Machine	untreated	0.882629	3.42778		1 ug/mL	0.819785	2.2719
Mother Machine	untreated	0.883629	2.99304		1 ug/mL	0.720378	2.27395
Mother Machine	untreated	0.884629	3.30726		1 ug/mL	0.720378	2.35029
Mother Machine	untreated	0.885629	3.36602		1 ug/mL	0.815328	2.41401
Mother Machine	untreated	0.886629	3.12558		1 ug/mL	0.815328	2.41134
Mother Machine	untreated	0.887629	3.12309		1 ug/mL	0.720378	2.27395
Mother Machine	untreated	0.888629	3.3307		1 ug/mL	0.720378	2.35029
Mother Machine	untreated	0.889629	2.87165		1 ug/mL	0.815328	2.41401
Mother Machine	untreated	0.890629	2.94015		1 ug/mL	0.815328	2.41134
Mother Machine	untreated	0.891629	2.99882		1 ug/mL	0.852186	2.2871
Mother Machine	untreated	0.892629	3.20228		1 ug/mL	0.783816	2.61087
Mother Machine	untreated	0.893629	3.50723		1 ug/mL	0.783816	2.54304
Mother Machine	untreated	0.894629	3.19391		1 ug/mL	0.720879	2.48302
Mother Machine	untreated	0.895629	3.0735		1 ug/mL	0.786077	2.35658
Mother Machine	untreated	0.896629	3.31861		1 ug/mL	0.690642	2.36002
Mother Machine	untreated	0.897629	3.3087		1 ug/mL	0.819588	2.47824
Mother Machine	untreated	0.898629	3.45487		1 ug/mL	0.819588	2.15532
Mother Machine	untreated	0.899629	3.25357		1 ug/mL	0.690642	2.36002
Mother Machine	untreated	0.900629	3.45843		1 ug/mL	0.819588	2.47824
Mother Machine	untreated	0.901629	3.19558		1 ug/mL	0.819588	2.15532
Mother Machine	untreated	0.902629	3.45137		1 ug/mL	0.848062	2.15396
Mother Machine	untreated	0.903629	3.44521		1 ug/mL	0.849657	2.51469
Mother Machine	untreated	0.904629	3.18133		1 ug/mL	0.882435	2.28202
Mother Machine	untreated	0.905629	3.25586		1 ug/mL	0.849866	2.3463
Mother Machine	untreated	0.906629	3.44876		1 ug/mL	0.721875	2.28717
Mother Machine	untreated	0.907629	3.12309		1 ug/mL	0.817563	2.02588
Mother Machine	untreated	0.908629	3.3307		1 ug/mL	0.721875	2.28717
Mother Machine	untreated	0.909629	2.87165		1 ug/mL	0.817563	2.02588
Mother Machine	untreated	0.910629	2.94015		1 ug/mL	0.816872	2.60995
Mother Machine	untreated	0.911629	2.99882		1 ug/mL	0.817798	2.2834
Mother Machine	untreated	0.912629	3.20228		1 ug/mL	0.817798	2.47983
Mother Machine	untreated	0.913629	3.50723		1 ug/mL	0.685946	2.6784
Mother Machine	untreated	0.914629	3.19391		1 ug/mL	0.752882	2.61584
Mother Machine	untreated	0.915629	3.0735		1 ug/mL	0.882142	2.61619
Mother Machine	untreated	0.916629	3.31861		1 ug/mL	0.784092	2.59821
Mother Machine	untreated	0.917629	3.3087		1 ug/mL	0.815872	2.48594
Mother Machine	untreated	0.918629	3.45487		1 ug/mL	0.847937	2.21175
Mother Machine	untreated	0.919629	3.25357
Mother Machine	untreated	0.920629	3.45843
Mother Machine	untreated	0.921629	3.19558
Mother Machine	untreated	0.922629	3.45137
Mother Machine	untreated	0.923629	3.44521
Mother Machine	untreated	0.924629	3.18133
Mother Machine	untreated	0.925629	3.25586
Mother Machine	untreated	0.926629	3.44876
Mother Machine	untreated	0.927629	3.25864
Mother Machine	untreated	0.928629	3.5912
Mother Machine	untreated	0.929629	3.48849
Mother Machine	untreated	0.930629	2.8736
Mother Machine	untreated	0.931629	3.12718
Mother Machine	untreated	0.932629	3.52298
Mother Machine	untreated	0.933629	3.31366
Mother Machine	untreated	0.934629	3.19448
Mother Machine	untreated	0.935629	3.44044
Mother Machine	untreated	0.936629	3.45296
Mother Machine	untreated	0.937629	3.44709
Mother Machine	untreated	0.938629	3.11111
Mother Machine	untreated	0.939629	3.57343
Mother Machine	untreated	0.940629	3.30882
Mother Machine	untreated	0.941629	3.31415
Mother Machine	untreated	0.942629	3.25708
Mother Machine	untreated	0.943629	3.323
Mother Machine	untreated	0.944629	3.32514
Mother Machine	untreated	0.945629	3.11563
Mother Machine	untreated	0.946629	3.32546
Mother Machine	untreated	0.947629	3.18339
Mother Machine	untreated	0.948629	3.64691
Mother Machine	untreated	0.949629	3.62939
Mother Machine	untreated	0.950629	3.24664
Mother Machine	untreated	0.951629	3.44292
Mother Machine	untreated	0.952629	3.25139
Mother Machine	untreated	0.953629	3.04505
Mother Machine	untreated	0.954629	3.12534
Mother Machine	untreated	0.955629	3.06607
Mother Machine	untreated	0.956629	3.44041
Mother Machine	untreated	0.957629	3.05104
Mother Machine	untreated	0.958629	3.17938
Mother Machine	untreated	0.959629	3.00467
Mother Machine	untreated	0.960629	2.98887
Mother Machine	untreated	0.961629	2.80214
Mother Machine	untreated	0.962629	3.05584
Mother Machine	untreated	0.963629	3.34966
Mother Machine	untreated	0.964629	2.93518
Mother Machine	untreated	0.965629	3.00337
Mother Machine	untreated	0.966629	3.24608
Mother Machine	untreated	0.967629	3.04726
Mother Machine	untreated	0.968629	3.17796
Mother Machine	untreated	0.969629	3.13326
Mother Machine	untreated	0.970629	3.38025
Mother Machine	untreated	0.971629	3.00615
Mother Machine	untreated	0.972629	3.30817
Mother Machine	untreated	0.973629	3.0559
Mother Machine	untreated	0.974629	3.43118
Mother Machine	untreated	0.975629	3.18468
Mother Machine	untreated	0.976629	3.50801
Mother Machine	untreated	0.977629	3.57963
Mother Machine	untreated	0.978629	3.31437
Mother Machine	untreated	0.979629	2.87107
Mother Machine	untreated	0.980629	2.87121
Mother Machine	untreated	0.981629	2.91268
Mother Machine	untreated	0.982629	2.87324
Mother Machine	untreated	0.983629	2.79996
Mother Machine	untreated	0.984629	3.24999
Mother Machine	untreated	0.985629	2.72735
Mother Machine	untreated	0.986629	3.25962
Mother Machine	untreated	0.987629	3.24703
Mother Machine	untreated	0.988629	3.69936
Mother Machine	untreated	0.989629	3.17056
Mother Machine	untreated	0.990629	3.32606
Mother Machine	untreated	0.991629	3.1295
Mother Machine	untreated	0.992629	3.52081
Mother Machine	untreated	0.993629	3.24577
Mother Machine	untreated	0.994629	3.37755
Mother Machine	untreated	0.995629	3.12305
Mother Machine	untreated	0.996629	3.313
Mother Machine	untreated	0.997629	2.9965
Mother Machine	untreated	0.998629	3.37189
Mother Machine	untreated	0.999629	3.16781
Mother Machine	untreated	1.00063	2.93125
Mother Machine	untreated	1.00163	3.06063
Mother Machine	untreated	1.00263	3.0362
Mother Machine	untreated	1.00363	2.851
Mother Machine	untreated	1.00463	2.86709
Mother Machine	untreated	1.00563	3.37453
Mother Machine	untreated	1.00663	2.92763
Mother Machine	untreated	1.00763	3.04623
Mother Machine	untreated	1.00863	3.24778
Mother Machine	untreated	1.00963	3.0739
Mother Machine	untreated	1.01063	3.05412
Mother Machine	untreated	1.01163	3.56863
Mother Machine	untreated	1.01263	3.56892
Mother Machine	untreated	1.01363	3.10762
Mother Machine	untreated	1.01463	2.94203
Mother Machine	untreated	1.01563	3.55919
Mother Machine	untreated	1.01663	2.98886
Mother Machine	untreated	1.01763	3.33121
Mother Machine	untreated	1.01863	2.67676
Mother Machine	untreated	1.01963	3.63454
Mother Machine	untreated	1.02063	2.99312
Mother Machine	untreated	1.02163	3.26294
Mother Machine	untreated	1.02263	3.69409
Mother Machine	untreated	1.02363	2.94475
Mother Machine	untreated	1.02463	3.04003
Mother Machine	untreated	1.02563	3.00267
Mother Machine	untreated	1.02663	2.74434
Mother Machine	untreated	1.02763	2.80841
Mother Machine	untreated	1.02863	2.98957
Mother Machine	untreated	1.02963	2.94203
Mother Machine	untreated	1.03063	3.55919
Mother Machine	untreated	1.03163	2.98886
Mother Machine	untreated	1.03263	3.33121
Mother Machine	untreated	1.03363	2.67676
Mother Machine	untreated	1.03463	3.63454
Mother Machine	untreated	1.03563	2.99312
Mother Machine	untreated	1.03663	3.26294
Mother Machine	untreated	1.03763	3.69409
Mother Machine	untreated	1.03863	2.94475
Mother Machine	untreated	1.03963	3.04003
Mother Machine	untreated	1.04063	3.00267
Mother Machine	untreated	1.04163	2.74434
Mother Machine	untreated	1.04263	2.80841
Mother Machine	untreated	1.04363	2.98957
Mother Machine	untreated	1.04463	3.23925
Mother Machine	untreated	1.04563	3.70396
Mother Machine	untreated	1.04663	3.39383
Mother Machine	untreated	1.04763	3.64134
Mother Machine	untreated	1.04863	3.31996
Mother Machine	untreated	1.04963	3.26493
Mother Machine	untreated	1.05063	3.44085
Mother Machine	untreated	1.05163	3.31229
Mother Machine	untreated	1.05263	3.38164
Mother Machine	untreated	1.05363	2.99313
Mother Machine	untreated	1.05463	3.30419
Mother Machine	untreated	1.05563	3.00979
Mother Machine	untreated	1.05663	2.94027
Mother Machine	untreated	1.05763	3.3085
Mother Machine	untreated	1.05863	3.31505
Mother Machine	untreated	1.05963	3.00344
Mother Machine	untreated	1.06063	3.1976
Mother Machine	untreated	1.06163	3.2506
Mother Machine	untreated	1.06263	3.31462
Mother Machine	untreated	1.06363	3.19565
Mother Machine	untreated	1.06463	3.24579
Mother Machine	untreated	1.06563	3.10634
Mother Machine	untreated	1.06663	3.30894
Mother Machine	untreated	1.06763	2.86432
Mother Machine	untreated	1.06863	2.74303
Mother Machine	untreated	1.06963	3.18578
Mother Machine	untreated	1.07063	3.12911
Mother Machine	untreated	1.07163	3.33342
Mother Machine	untreated	1.07263	3.00123
Mother Machine	untreated	1.07363	2.93321
Mother Machine	untreated	1.07463	3.19772
Mother Machine	untreated	1.07563	3.24192
Mother Machine	untreated	1.07663	3.00012
Mother Machine	untreated	1.07763	3.05331
Mother Machine	untreated	1.07863	3.06295
Mother Machine	untreated	1.07963	3.0582
Mother Machine	untreated	1.08063	3.51412
Mother Machine	untreated	1.08163	2.99342
Mother Machine	untreated	1.08263	3.30267
Mother Machine	untreated	1.08363	3.25988
Mother Machine	untreated	1.08463	2.59546
Mother Machine	untreated	1.08563	2.68033
Mother Machine	untreated	1.08663	2.7332
Mother Machine	untreated	1.08763	2.79915
Mother Machine	untreated	1.08863	2.78885
Mother Machine	untreated	1.08963	3.11541
Mother Machine	untreated	1.09063	3.04848
Mother Machine	untreated	1.09163	2.74385
Mother Machine	untreated	1.09263	3.62574
Mother Machine	untreated	1.09363	2.74547
Mother Machine	untreated	1.09463	3.51617
Mother Machine	untreated	1.09563	3.0547
Mother Machine	untreated	1.09663	3.00392
Mother Machine	untreated	1.09763	3.51545
Mother Machine	untreated	1.09863	3.12603
Mother Machine	untreated	1.09963	3.06537
Mother Machine	untreated	1.10063	3.13435
Mother Machine	untreated	1.10163	3.31581
Mother Machine	untreated	1.10263	3.24548
Mother Machine	untreated	1.10363	3.11761
Mother Machine	untreated	1.10463	3.43839
Mother Machine	untreated	1.10563	3.52379
Mother Machine	untreated	1.10663	3.45075
Mother Machine	untreated	1.10763	3.11503
Mother Machine	untreated	1.10863	3.32482
Mother Machine	untreated	1.10963	3.6467
Mother Machine	untreated	1.11063	3.24933
Mother Machine	untreated	1.11163	3.25503
Mother Machine	untreated	1.11263	3.50924
Mother Machine	untreated	1.11363	3.0591
Mother Machine	untreated	1.11463	3.13247
Mother Machine	untreated	1.11563	3.12489
Mother Machine	untreated	1.11663	3.05712
Mother Machine	untreated	1.11763	3.06597
Mother Machine	untreated	1.11863	2.93766
Mother Machine	untreated	1.11963	3.12397
Mother Machine	untreated	1.12063	2.92431
Mother Machine	untreated	1.12163	2.73554
Mother Machine	untreated	1.12263	2.93898
Mother Machine	untreated	1.12363	3.13109
Mother Machine	untreated	1.12463	2.99097
Mother Machine	untreated	1.12563	3.37412
Mother Machine	untreated	1.12663	3.1815
Mother Machine	untreated	1.12763	2.80379
Mother Machine	untreated	1.12863	2.80816
Mother Machine	untreated	1.12963	3.31571
Mother Machine	untreated	1.13063	3.18263
Mother Machine	untreated	1.13163	3.07383
Mother Machine	untreated	1.13263	2.74309
Mother Machine	untreated	1.13363	3.2423
Mother Machine	untreated	1.13463	3.06318
Mother Machine	untreated	1.13563	3.11641
Mother Machine	untreated	1.13663	2.72139
Mother Machine	untreated	1.13763	2.99883
Mother Machine	untreated	1.13863	2.55378
Mother Machine	untreated	1.13963	2.98704
Mother Machine	untreated	1.14063	2.99323
Mother Machine	untreated	1.14163	2.66839
Mother Machine	untreated	1.14263	3.18117
Mother Machine	untreated	1.14363	3.05816
Mother Machine	untreated	1.14463	2.93199
Mother Machine	untreated	1.14563	3.63325
Mother Machine	untreated	1.14663	2.72728
Mother Machine	untreated	1.14763	3.12658
Mother Machine	untreated	1.14863	2.79015
Mother Machine	untreated	1.14963	2.93299
Mother Machine	untreated	1.15063	2.86798
Mother Machine	untreated	1.15163	2.80176
Mother Machine	untreated	1.15263	2.92614
Mother Machine	untreated	1.15363	2.54609
Mother Machine	untreated	1.15463	2.48843
Mother Machine	untreated	1.15563	3.18168
Mother Machine	untreated	1.15663	2.66827
Mother Machine	untreated	1.15763	2.87388
Mother Machine	untreated	1.15863	2.8049
Mother Machine	untreated	1.15963	3.13415
Mother Machine	untreated	1.16063	3.56098
Mother Machine	untreated	1.16163	3.05824
Mother Machine	untreated	1.16263	2.86577
Mother Machine	untreated	1.16363	3.26187
Mother Machine	untreated	1.16463	2.87815
Mother Machine	untreated	1.16563	3.26148
Mother Machine	untreated	1.16663	2.48301
Mother Machine	untreated	1.16763	2.98774
Mother Machine	untreated	1.16863	3.00316
Mother Machine	untreated	1.16963	2.68141
Mother Machine	untreated	1.17063	2.93766
Mother Machine	untreated	1.17163	3.36888
Mother Machine	untreated	1.17263	2.55276
Mother Machine	untreated	1.17363	3.17977
Mother Machine	untreated	1.17463	2.93587
Mother Machine	untreated	1.17563	2.99762
Mother Machine	untreated	1.17663	2.99758
Mother Machine	untreated	1.17763	3.45563
Mother Machine	untreated	1.17863	2.9364
Mother Machine	untreated	1.17963	2.87049
Mother Machine	untreated	1.18063	2.54405
Mother Machine	untreated	1.18163	3.12551
Mother Machine	untreated	1.18263	2.98574
Mother Machine	untreated	1.18363	2.86677
Mother Machine	untreated	1.18463	3.32387
Mother Machine	untreated	1.18563	3.12207
Mother Machine	untreated	1.18663	2.85678
Mother Machine	untreated	1.18763	3.18255
Mother Machine	untreated	1.18863	3.18188
Mother Machine	untreated	1.18963	3.0669
Mother Machine	untreated	1.19063	2.79599
Mother Machine	untreated	1.19163	3.2406
Mother Machine	untreated	1.19263	3.1763
Mother Machine	untreated	1.19363	2.87422
Mother Machine	untreated	1.19463	3.00673
Mother Machine	untreated	1.19563	2.6844
Mother Machine	untreated	1.19663	2.73891
Mother Machine	untreated	1.19763	2.99907
Mother Machine	untreated	1.19863	2.65898
Mother Machine	untreated	1.19963	2.7372
Mother Machine	untreated	1.20063	3.1302
Mother Machine	untreated	1.20163	3.17537
Mother Machine	untreated	1.20263	3.12625
Mother Machine	untreated	1.20363	3.10963
Mother Machine	untreated	1.20463	2.67794
Mother Machine	untreated	1.20563	3.19944
Mother Machine	untreated	1.20663	2.99423
Mother Machine	untreated	1.20763	3.43658
Mother Machine	untreated	1.20863	2.66938
Mother Machine	untreated	1.20963	3.24713
Mother Machine	untreated	1.21063	2.7373
Mother Machine	untreated	1.21163	3.69854
Mother Machine	untreated	1.21263	2.9332
Mother Machine	untreated	1.21363	2.87393
Mother Machine	untreated	1.21463	2.80411
Mother Machine	untreated	1.21563	2.66858
Mother Machine	untreated	1.21663	2.85399
Mother Machine	untreated	1.21763	3.28873
Mother Machine	untreated	1.21863	2.53695
Mother Machine	untreated	1.21963	2.40279
Mother Machine	untreated	1.22063	2.79805
Mother Machine	untreated	1.22163	2.79252
Mother Machine	untreated	1.22263	3.13464
Mother Machine	untreated	1.22363	2.99622
Mother Machine	untreated	1.22463	2.81401
Mother Machine	untreated	1.22563	2.93089
Mother Machine	untreated	1.22663	2.72739
Mother Machine	untreated	1.22763	2.79997
Mother Machine	untreated	1.22863	2.85538
Mother Machine	untreated	1.22963	2.72758
Mother Machine	untreated	1.23063	2.46771
Mother Machine	untreated	1.23163	3.18266
Mother Machine	untreated	1.23263	3.11216
Mother Machine	untreated	1.23363	3.44725
Mother Machine	untreated	1.23463	2.93691
Mother Machine	untreated	1.23563	2.79822
Mother Machine	untreated	1.23663	2.60717
Mother Machine	untreated	1.23763	3.17621
Mother Machine	untreated	1.23863	3.31099
Mother Machine	untreated	1.23963	2.99018
Mother Machine	untreated	1.24063	2.87229
Mother Machine	untreated	1.24163	2.79412
Mother Machine	untreated	1.24263	3.18501
Mother Machine	untreated	1.24363	3.49141
Mother Machine	untreated	1.24463	3.06139
Mother Machine	untreated	1.24563	3.49141
Mother Machine	untreated	1.24663	3.06139
Mother Machine	untreated	1.24763	3.13468
Mother Machine	untreated	1.24863	3.00382
Mother Machine	untreated	1.24963	2.85493
Mother Machine	untreated	1.25063	3.25942
Mother Machine	untreated	1.25163	3.25731
Mother Machine	untreated	1.25263	2.87203
Mother Machine	untreated	1.25363	2.73465
Mother Machine	untreated	1.25463	3.00223
Mother Machine	untreated	1.25563	2.94033
Mother Machine	untreated	1.25663	3.00596
Mother Machine	untreated	1.25763	3.2006
Mother Machine	untreated	1.25863	3.25375
Mother Machine	untreated	1.25963	3.25719
Mother Machine	untreated	1.26063	3.38938
Mother Machine	untreated	1.26163	3.06061
Mother Machine	untreated	1.26263	3.44642
Mother Machine	untreated	1.26363	3.26718
Mother Machine	untreated	1.26463	3.25449
Mother Machine	untreated	1.26563	3.62463
Mother Machine	untreated	1.26663	2.9924
Mother Machine	untreated	1.26763	3.11483
Mother Machine	untreated	1.26863	3.06025
Mother Machine	untreated	1.26963	2.67821
Mother Machine	untreated	1.27063	3.10317
Mother Machine	untreated	1.27163	2.73469
Mother Machine	untreated	1.27263	2.9974
Mother Machine	untreated	1.27363	3.4551
Mother Machine	untreated	1.27463	3.40054
Mother Machine	untreated	1.27563	3.058
Mother Machine	untreated	1.27663	3.94569
Mother Machine	untreated	1.27763	3.43402
Mother Machine	untreated	1.27863	2.93413
Mother Machine	untreated	1.27963	3.05114
Mother Machine	untreated	1.28063	2.93696
Mother Machine	untreated	1.28163	2.73465
Mother Machine	untreated	1.28263	3.12401
Mother Machine	untreated	1.28363	3.05266
Mother Machine	untreated	1.28463	3.06276
Mother Machine	untreated	1.28563	3.05357
Mother Machine	untreated	1.28663	3.03904
Mother Machine	untreated	1.28763	2.86583
Mother Machine	untreated	1.28863	2.94181
Mother Machine	untreated	1.28963	3.06203
Mother Machine	untreated	1.29063	2.72092
Mother Machine	untreated	1.29163	2.9173
Mother Machine	untreated	1.29263	3.179
Mother Machine	untreated	1.29363	3.38226
Mother Machine	untreated	1.29463	2.73972
Mother Machine	untreated	1.29563	2.93608
Mother Machine	untreated	1.29663	2.73318
Mother Machine	untreated	1.29763	2.93205
Mother Machine	untreated	1.29863	2.65786
Mother Machine	untreated	1.29963	3.0606
Mother Machine	untreated	1.30063	3.13735
Mother Machine	untreated	1.30163	3.38056
Mother Machine	untreated	1.30263	3.12811
Mother Machine	untreated	1.30363	3.36303
Mother Machine	untreated	1.30463	2.67993
Mother Machine	untreated	1.30563	3.33325
Mother Machine	untreated	1.30663	2.61442
Mother Machine	untreated	1.30763	3.12703
Mother Machine	untreated	1.30863	3.18719
Mother Machine	untreated	1.30963	2.93742
Mother Machine	untreated	1.31063	2.92103
Mother Machine	untreated	1.31163	3.45474
Mother Machine	untreated	1.31263	2.94176
Mother Machine	untreated	1.31363	2.9151
Mother Machine	untreated	1.31463	3.19382
Mother Machine	untreated	1.31563	3.04512
Mother Machine	untreated	1.31663	2.48162
Mother Machine	untreated	1.31763	2.92013
Mother Machine	untreated	1.31863	2.9289
Mother Machine	untreated	1.31963	3.0607
Mother Machine	untreated	1.32063	3.25907
Mother Machine	untreated	1.32163	3.31317
Mother Machine	untreated	1.32263	2.87851
Mother Machine	untreated	1.32363	3.12191
Mother Machine	untreated	1.32463	2.98374
Mother Machine	untreated	1.32563	2.98447
Mother Machine	untreated	1.32663	2.87133
Mother Machine	untreated	1.32763	3.18825
Mother Machine	untreated	1.32863	3.45348
Mother Machine	untreated	1.32963	3.3078
Mother Machine	untreated	1.33063	2.7381
Mother Machine	untreated	1.33163	3.31481
Mother Machine	untreated	1.33263	3.24607
Mother Machine	untreated	1.33363	3.13035
Mother Machine	untreated	1.33463	3.57594
Mother Machine	untreated	1.33563	2.6142
Mother Machine	untreated	1.33663	3.06172
Mother Machine	untreated	1.33763	3.19398
Mother Machine	untreated	1.33863	2.92852
Mother Machine	untreated	1.33963	3.19433
Mother Machine	untreated	1.34063	2.86961
Mother Machine	untreated	1.34163	2.78423
Mother Machine	untreated	1.34263	2.67364
Mother Machine	untreated	1.34363	2.67227
Mother Machine	untreated	1.34463	2.93827
Mother Machine	untreated	1.34563	3.37815
Mother Machine	untreated	1.34663	3.63362
Mother Machine	untreated	1.34763	3.00686
Mother Machine	untreated	1.34863	3.37258
Mother Machine	untreated	1.34963	3.18574
Mother Machine	untreated	1.35063	3.05414
Mother Machine	untreated	1.35163	3.29926
Mother Machine	untreated	1.35263	3.11752
Mother Machine	untreated	1.35363	3.06744
Mother Machine	untreated	1.35463	3.16663
Mother Machine	untreated	1.35563	3.05123
Mother Machine	untreated	1.35663	2.8725
Mother Machine	untreated	1.35763	2.6699
Mother Machine	untreated	1.35863	3.06461
Mother Machine	untreated	1.35963	3.10861
Mother Machine	untreated	1.36063	2.88277
Mother Machine	untreated	1.36163	3.17929
Mother Machine	untreated	1.36263	3.04659
Mother Machine	untreated	1.36363	3.18632
Mother Machine	untreated	1.36463	3.00008
Mother Machine	untreated	1.36563	3.39021
Mother Machine	untreated	1.36663	2.99571
Mother Machine	untreated	1.36763	3.24663
Mother Machine	untreated	1.36863	3.32771
Mother Machine	untreated	1.36963	3.25695
Mother Machine	untreated	1.37063	2.81436
Mother Machine	untreated	1.37163	2.92211
Mother Machine	untreated	1.37263	3.31039
Mother Machine	untreated	1.37363	3.05818
Mother Machine	untreated	1.37463	3.4472
Mother Machine	untreated	1.37563	3.22961
Mother Machine	untreated	1.37663	3.2041
Mother Machine	untreated	1.37763	3.18364
Mother Machine	untreated	1.37863	3.12897
Mother Machine	untreated	1.37963	3.19215
Mother Machine	untreated	1.38063	3.12436
Mother Machine	untreated	1.38163	3.07327
Mother Machine	untreated	1.38263	2.66965
Mother Machine	untreated	1.38363	2.60236
Mother Machine	untreated	1.38463	2.9948
Mother Machine	untreated	1.38563	2.87041
Mother Machine	untreated	1.38663	2.80215
Mother Machine	untreated	1.38763	3.12409
Mother Machine	untreated	1.38863	3.11778
Mother Machine	untreated	1.38963	2.73827
Mother Machine	untreated	1.39063	2.71924
Mother Machine	untreated	1.39163	3.11353
Mother Machine	untreated	1.39263	2.87919
Mother Machine	untreated	1.39363	3.30678
Mother Machine	untreated	1.39463	3.43638
Mother Machine	untreated	1.39563	3.44302
Mother Machine	untreated	1.39663	3.51706
Mother Machine	untreated	1.39763	3.26445
Mother Machine	untreated	1.39863	3.3042
Mother Machine	untreated	1.39963	2.92052
Mother Machine	untreated	1.40063	2.54161
Mother Machine	untreated	1.40163	2.73436
Mother Machine	untreated	1.40263	2.79713
Mother Machine	untreated	1.40363	3.25722
Mother Machine	untreated	1.40463	3.12242
Mother Machine	untreated	1.40563	3.31582
Mother Machine	untreated	1.40663	3.50514
Mother Machine	untreated	1.40763	3.43245
Mother Machine	untreated	1.40863	2.94289
Mother Machine	untreated	1.40963	3.43905
Mother Machine	untreated	1.41063	3.11871
Mother Machine	untreated	1.41163	2.87869
Mother Machine	untreated	1.41263	2.92204
Mother Machine	untreated	1.41363	3.23667
Mother Machine	untreated	1.41463	2.543
Mother Machine	untreated	1.41563	2.85291
Mother Machine	untreated	1.41663	3.06149
Mother Machine	untreated	1.41763	3.44717
Mother Machine	untreated	1.41863	2.74509
Mother Machine	untreated	1.41963	2.73769
Mother Machine	untreated	1.42063	2.94472
Mother Machine	untreated	1.42163	3.1213
Mother Machine	untreated	1.42263	2.67241
Mother Machine	untreated	1.42363	2.79929
Mother Machine	untreated	1.42463	3.11149
Mother Machine	untreated	1.42563	2.67668
Mother Machine	untreated	1.42663	2.73837
Mother Machine	untreated	1.42763	2.80659
Mother Machine	untreated	1.42863	2.60293
Mother Machine	untreated	1.42963	2.74233
Mother Machine	untreated	1.43063	2.66926
Mother Machine	untreated	1.43163	3.32652
Mother Machine	untreated	1.43263	2.41126
Mother Machine	untreated	1.43363	2.61696
Mother Machine	untreated	1.43463	2.67784
Mother Machine	untreated	1.43563	2.94257
Mother Machine	untreated	1.43663	2.79362
Mother Machine	untreated	1.43763	2.8706
Mother Machine	untreated	1.43863	2.91534
Mother Machine	untreated	1.43963	3.1194
Mother Machine	untreated	1.44063	2.81295

## Sheet: Fig3H
condition	A22 concentration	Average D period (min)	Slope of Linit as a function of Ldivision
Mother Machine	0	26.1652	0.957748
Mother Machine	0	19.3192	0.964489
Mother Machine	0	19.0609	0.767935
Mother Machine	0.25	34.9277	0.742087
Mother Machine	0.25	20.6622	1.04444
Mother Machine	0.25	28.3878	0.605932
Mother Machine	0.25	35.9695	0.650449
Mother Machine	0.5	38.2703	0.57127
Mother Machine	0.5	70.1199	-0.174613
Mother Machine	0.5	41.4783	0.55598
Mother Machine	0.5	37.7647	0.629633
Mother Machine	1	88.6346	0.305536
Mother Machine	1	74.0305	-0.242121
Mother Machine	1	44.2308	0.405877

## Sheet: Fig3_Sup1
condition	A22 concentration	Birth length (um)	Added length during cell cycle (um)	Initiation length per ori mother (um)	Added length between subsequent initiations (um)	Initiation length per ori (norm.)	Added length during C+D period (um)
Mother Machine	untreated	1.18092	1.22623	1.11049	1.52222	1.31636	1.09079
Mother Machine	untreated	1.44145	1.73206	1.63455	2.16309	1.89882	1.27469
Mother Machine	untreated	1.37752	1.48021	1.63455	2.15615	1.89535	0.962379
Mother Machine	untreated	1.57319	0.910418	1.83311	1.69977	1.76644	0.717164
Mother Machine	untreated	1.57355	1.48627	1.76609	1.64917	1.70763	1.35219
Mother Machine	untreated	1.51105	1.62623	1.76609	1.91182	1.83896	1.29832
Mother Machine	untreated	1.50987	1.53798	1.89882	1.89178	1.8953	1.15255
Mother Machine	untreated	1.57702	1.68265	1.8953	2.41577	2.15553	1.10414
Mother Machine	untreated	1.56715	1.63328	1.63839	1.88513	1.76176	1.43867
Mother Machine	untreated	1.56924	1.28193	1.63839	1.7638	1.70109	1.15008
Mother Machine	untreated	1.43744	1.73617	1.83154	1.70011	1.76583	1.40779
Mother Machine	untreated	1.82838	1.2972	1.76532	2.28612	2.02572	1.09986
Mother Machine	untreated	1.69732	1.40418	1.76532	1.8964	1.83086	1.27064
Mother Machine	untreated	1.57364	1.81325	2.02572	1.38303	1.70438	1.68251
Mother Machine	untreated	1.44225	1.49159	1.83086	1.81999	1.82542	1.10842
Mother Machine	untreated	1.44945	1.36295	1.82542	1.30933	1.56738	1.24502
Mother Machine	untreated	1.56971	1.49901	1.82542	1.58307	1.70425	1.36447
Mother Machine	untreated	1.43966	1.44226	1.70425	1.43209	1.56817	1.31375
Mother Machine	untreated	1.44112	1.55813	1.56817	1.45548	1.51183	1.48742
Mother Machine	untreated	1.37574	1.82452	1.51183	2.55657	2.0342	1.16607
Mother Machine	untreated	1.57064	1.62345	2.0342	1.63644	1.83532	1.35877
Mother Machine	untreated	1.31104	1.49511	1.57008	1.8296	1.69984	1.10631
Mother Machine	untreated	1.44485	1.41722	1.50528	1.91143	1.70835	1.15372
Mother Machine	untreated	1.38082	1.55574	2.15419	1.24834	1.70126	1.23529
Mother Machine	untreated	1.57603	1.20236	2.15419	1.50982	1.832	0.946382
Mother Machine	untreated	1.3105	1.61763	1.70835	1.30935	1.50885	1.41928
Mother Machine	untreated	1.44347	1.02823	1.69984	1.70861	1.70422	0.76748
Mother Machine	untreated	1.315	1.29354	1.69984	1.06171	1.38077	1.22777
Mother Machine	untreated	1.11669	1.61533	1.38077	2.15714	1.76895	0.963061
Mother Machine	untreated	1.38823	1.40377	1.82664	1.58627	1.70646	1.08554
Mother Machine	untreated	1.25409	1.33618	1.70646	1.30843	1.50745	1.08282
Mother Machine	untreated	1.31273	1.41678	1.50745	1.63906	1.57325	1.15625
Mother Machine	untreated	1.5744	1.0976	1.50665	1.6309	1.56877	1.10322
Mother Machine	untreated	1.51	1.29827	1.44253	1.83272	1.63763	1.17064
Mother Machine	untreated	1.57889	1.42536	1.63763	1.7656	1.70161	1.30264
Mother Machine	untreated	1.31321	1.73262	1.63763	1.50358	1.5706	1.47522
Mother Machine	untreated	1.31371	1.6124	1.70161	1.56304	1.63233	1.29378
Mother Machine	untreated	1.51616	1.45952	1.5706	1.96772	1.76916	1.20651
Mother Machine	untreated	1.44245	1.48479	1.5044	1.64208	1.57324	1.354
Mother Machine	untreated	1.37562	1.49787	1.5044	1.63556	1.56998	1.30352
Mother Machine	untreated	1.50776	1.49192	1.56998	1.43883	1.5044	1.49528
Mother Machine	untreated	1.38026	1.6137	1.56998	1.44797	1.50897	1.48499
Mother Machine	untreated	1.37844	1.34731	1.50897	1.37549	1.44223	1.28352
Mother Machine	untreated	1.11646	1.49587	1.44381	1.82727	1.63554	0.976797
Mother Machine	untreated	1.24551	1.37023	1.37531	1.65479	1.51505	1.1007
Mother Machine	untreated	0.992006	1.54361	1.37657	1.6338	1.50518	1.03043
Mother Machine	untreated	1.12365	1.47683	1.31955	1.83184	1.5757	1.02478
Mother Machine	untreated	1.44398	1.35784	1.50518	1.50652	1.50585	1.29597
Mother Machine	untreated	1.24896	1.73667	1.5757	1.95558	1.76564	1.21999
Mother Machine	untreated	1.2484	1.55678	1.50962	1.51613	1.51288	1.2923
Mother Machine	untreated	1.50931	1.53838	1.5754	2.46914	2.02227	1.02542
Mother Machine	untreated	1.44009	1.2292	1.76564	1.63215	1.6989	0.970386
Mother Machine	untreated	1.37492	1.17381	1.51288	1.7592	1.63604	0.9127
Mother Machine	untreated	1.25046	1.16797	1.63604	1.50307	1.56955	0.84887
Mother Machine	untreated	1.24718	1.67485	1.76455	1.77352	1.76903	1.15299
Mother Machine	untreated	1.19053	1.22407	1.76903	1.37379	1.57141	0.843189
Mother Machine	untreated	1.37751	1.61525	2.0926	1.95975	2.02618	0.966585
Mother Machine	untreated	1.11876	1.29254	1.57141	1.44755	1.50948	0.901814
Mother Machine	untreated	1.44155	1.11398	1.83238	1.69833	1.76535	0.790178
Mother Machine	untreated	1.31004	1.23829	1.83238	1.30477	1.56857	0.979761
Mother Machine	untreated	1.31535	1.55437	1.56857	1.83849	1.70353	1.16618
Mother Machine	untreated	1.25424	1.55226	1.76535	2.04122	1.90329	0.903216
Mother Machine	untreated	1.44382	1.54823	1.90329	1.63098	1.76714	1.22492
Mother Machine	untreated	1.31347	1.79463	1.90329	2.14442	2.02385	1.08425
Mother Machine	untreated	1.5108	1.49067	1.76714	1.90663	1.83688	1.16459
Mother Machine	untreated	1.44792	1.3479	1.76714	1.89758	1.83236	0.963469
Mother Machine	untreated	1.5717	1.2205	2.02385	1.11955	1.5717	1.2205
Mother Machine	untreated	1.44125	1.37421	1.83688	1.45159	1.64424	1.17122
Mother Machine	untreated	1.44293	1.16846	1.83688	2.33111	2.084	0.527391
Mother Machine	untreated	1.37526	1.62872	1.64424	1.62586	1.63505	1.36892
Mother Machine	untreated	1.31687	1.28589	1.64424	1.24271	1.44347	1.15928
Mother Machine	untreated	1.18034	1.23011	1.44347	1.1832	1.31334	1.09711
Mother Machine	untreated	1.31488	1.29315	1.5755	1.05425	1.31488	1.29315
Mother Machine	untreated	1.38078	1.35544	1.5755	1.18606	1.38078	1.35544
Mother Machine	untreated	1.31471	1.35938	1.76624	1.3874	1.57682	1.09727
Mother Machine	untreated	1.50899	1.16595	1.76624	1.6492	1.70772	0.967218
Mother Machine	untreated	1.50061	1.55773	1.96306	1.83421	1.89864	1.1597
Mother Machine	untreated	1.43865	1.54304	1.96306	1.70593	1.8345	1.14719
Mother Machine	untreated	1.51191	1.03144	1.50473	1.76987	1.6373	0.906053
Mother Machine	untreated	1.4384	1.55314	1.50473	1.6368	1.57076	1.42078
Mother Machine	untreated	1.31048	1.43366	1.6373	1.38206	1.50968	1.23446
Mother Machine	untreated	1.18189	1.56956	1.6373	1.2531	1.4452	1.30624
Mother Machine	untreated	1.50193	1.5519	1.57076	1.83641	1.70358	1.35025
Mother Machine	untreated	1.57992	1.52669	1.57076	2.35528	1.96302	1.14359
Mother Machine	untreated	1.51098	1.66221	1.70358	1.30869	1.50614	1.66706
Mother Machine	untreated	1.57109	1.54983	1.50614	2.15531	1.83072	1.2902
Mother Machine	untreated	1.50502	1.6864	1.50614	2.0271	1.76662	1.42479
Mother Machine	untreated	1.51191	1.03144	1.50473	1.76987	1.6373	0.906053
Mother Machine	untreated	1.4384	1.55314	1.50473	1.6368	1.57076	1.42078
Mother Machine	untreated	1.31048	1.43366	1.6373	1.38206	1.50968	1.23446
Mother Machine	untreated	1.18189	1.56956	1.6373	1.2531	1.4452	1.30624
Mother Machine	untreated	1.50193	1.5519	1.57076	1.83641	1.70358	1.35025
Mother Machine	untreated	1.57992	1.52669	1.57076	2.35528	1.96302	1.14359
Mother Machine	untreated	1.51098	1.66221	1.70358	1.30869	1.50614	1.66706
Mother Machine	untreated	1.57109	1.54983	1.50614	2.15531	1.83072	1.2902
Mother Machine	untreated	1.50502	1.6864	1.50614	2.0271	1.76662	1.42479
Mother Machine	untreated	1.63496	1.16192	1.83424	1.95224	1.89324	0.903644
Mother Machine	untreated	1.57141	1.41367	1.70601	2.09153	1.89877	1.08632
Mother Machine	untreated	1.37553	1.68336	1.70601	1.84403	1.77502	1.28387
Mother Machine	untreated	1.50834	1.16014	1.82843	1.57565	1.70204	0.966445
Mother Machine	untreated	1.18118	1.68178	1.70204	1.82052	1.76128	1.10167
Mother Machine	untreated	1.63541	1.54528	1.76128	1.91208	1.83668	1.34402
Mother Machine	untreated	1.24499	1.69994	1.76128	2.16692	1.9641	0.980832
Mother Machine	untreated	1.57221	1.61148	1.89593	2.15348	2.02471	1.15898
Mother Machine	untreated	1.70233	1.61232	2.02166	1.77248	1.89707	1.41758
Mother Machine	untreated	1.3117	1.47729	1.50725	1.76745	1.63735	1.15164
Mother Machine	untreated	1.24193	1.40914	1.50725	1.5005	1.50387	1.1472
Mother Machine	untreated	1.37565	1.3031	1.63735	1.6473	1.64232	1.03643
Mother Machine	untreated	1.24418	1.28162	1.50387	1.37436	1.43912	1.08668
Mother Machine	untreated	1.2422	1.42004	1.64232	1.50746	1.57489	1.08735
Mother Machine	untreated	1.50495	1.59997	1.70619	1.95926	1.83273	1.27219
Mother Machine	untreated	1.31423	1.55476	1.83081	1.71242	1.77161	1.09738
Mother Machine	untreated	1.62969	1.55078	1.83273	2.09009	1.96141	1.21906
Mother Machine	untreated	1.70442	1.78907	1.96141	2.35625	2.15883	1.33466
Mother Machine	untreated	1.6964	1.60675	2.14687	1.78096	1.96392	1.33923
Mother Machine	untreated	1.56755	1.42298	2.14687	1.64501	1.89594	1.09459
Mother Machine	untreated	1.45054	1.48996	1.7677	1.39866	1.58318	1.35733
Mother Machine	untreated	1.64191	1.30795	1.89594	1.90396	1.89995	1.04991
Mother Machine	untreated	1.37456	1.50079	1.89594	1.37781	1.63687	1.23848
Mother Machine	untreated	1.63519	1.36733	1.96392	1.56011	1.76201	1.2405
Mother Machine	untreated	1.57122	1.36946	1.96392	1.31636	1.64014	1.30054
Mother Machine	untreated	1.44731	1.28624	1.58318	1.69034	1.63676	1.09679
Mother Machine	untreated	1.51072	1.5388	1.76201	1.63471	1.69836	1.35115
Mother Machine	untreated	1.44418	1.55103	1.89995	1.24738	1.57367	1.42154
Mother Machine	untreated	1.51019	1.29153	1.64014	1.88853	1.76434	1.03738
Mother Machine	untreated	1.39047	1.02255	1.63687	1.51454	1.57571	0.837305
Mother Machine	untreated	1.50635	1.55124	1.69836	1.83154	1.76495	1.29264
Mother Machine	untreated	1.50765	1.99831	1.69836	2.37	2.03418	1.47178
Mother Machine	untreated	1.70443	1.48726	2.03418	1.88171	1.95795	1.23374
Mother Machine	untreated	1.37352	1.6166	1.7068	1.82619	1.7665	1.22362
Mother Machine	untreated	1.50813	1.18056	1.7068	1.57636	1.64158	1.04711
Mother Machine	untreated	1.31696	1.47785	1.70905	1.69662	1.70284	1.09197
Mother Machine	untreated	1.37571	1.22163	1.70284	1.31084	1.50684	1.0905
Mother Machine	untreated	1.43809	1.87268	1.51128	2.54011	2.02569	1.28508
Mother Machine	untreated	1.31034	1.74012	1.51128	2.1473	1.82929	1.22118
Mother Machine	untreated	1.31321	1.61873	1.64169	1.7483	1.695	1.23695
Mother Machine	untreated	1.5756	1.22301	1.77069	1.64772	1.7092	1.0894
Mother Machine	untreated	1.17982	1.03593	1.57284	1.18166	1.37725	0.838503
Mother Machine	untreated	1.44258	1.4796	1.83712	1.7108	1.77396	1.14822
Mother Machine	untreated	1.3756	1.55223	1.83712	1.57381	1.70546	1.22236
Mother Machine	untreated	1.57942	1.60369	1.77396	1.99962	1.88679	1.29632
Mother Machine	untreated	1.4462	1.61257	1.77396	1.76027	1.76712	1.29165
Mother Machine	untreated	1.37258	1.69108	1.76712	1.63228	1.6997	1.36396
Mother Machine	untreated	1.64353	1.42908	1.88679	2.15821	2.0225	1.05011
Mother Machine	untreated	1.44012	1.67226	1.88679	2.17492	2.03085	1.08153
Mother Machine	untreated	1.50769	1.4685	1.6997	1.8242	1.76195	1.21424
Mother Machine	untreated	1.37511	1.55502	1.6997	1.57689	1.6383	1.29184
Mother Machine	untreated	1.5739	1.61428	2.03085	1.90027	1.96556	1.22262
Mother Machine	untreated	1.50827	1.86019	2.03085	2.14556	2.08821	1.28026
Mother Machine	untreated	1.50625	1.74575	2.0225	1.76595	1.89423	1.35778
Mother Machine	untreated	1.51254	1.49162	2.0225	1.49674	1.75962	1.24454
Mother Machine	untreated	1.76257	1.21937	1.96556	1.83801	1.90179	1.08015
Mother Machine	untreated	1.50565	1.28473	1.96556	1.69645	1.83101	0.959375
Mother Machine	untreated	1.63921	1.47184	2.08821	1.57544	1.83182	1.27923
Mother Machine	untreated	1.57805	1.33488	1.70009	1.84968	1.77489	1.13804
Mother Machine	untreated	1.44478	1.22537	1.70009	1.44901	1.57455	1.0956
Mother Machine	untreated	1.11598	1.3614	1.37596	1.63396	1.50496	0.972421
Mother Machine	untreated	1.18185	1.67004	1.37596	2.03569	1.70583	1.14607
Mother Machine	untreated	1.04984	1.28894	1.37982	1.25119	1.3155	1.02328
Mother Machine	untreated	1.25619	1.46646	1.37982	1.51566	1.44774	1.27491
Mother Machine	untreated	1.18321	1.30723	1.44041	1.69996	1.57018	0.920263
Mother Machine	untreated	1.31465	1.09388	1.76694	1.2411	1.50402	0.904515
Mother Machine	untreated	1.37961	1.15466	1.50496	1.64464	1.5748	0.95947
Mother Machine	untreated	1.12199	1.28971	1.3155	1.44074	1.37812	1.03357
Mother Machine	untreated	1.24896	1.41559	1.44774	1.70195	1.57484	1.08971
Mother Machine	untreated	1.37479	1.48129	1.44774	1.82405	1.6359	1.22018
Mother Machine	untreated	1.18835	1.92958	1.50402	1.89163	1.69783	1.42011
Mother Machine	untreated	1.18441	1.35522	1.50402	1.50382	1.50392	1.03572
Mother Machine	untreated	1.18943	0.956923	1.37812	1.11917	1.24864	0.897713
Mother Machine	untreated	1.31797	1.48063	1.50392	1.38049	1.4422	1.35639
Mother Machine	untreated	1.31928	1.79702	1.50392	1.77176	1.63784	1.47845
Mother Machine	untreated	1.43996	1.36178	1.44099	1.83336	1.63717	1.16457
Mother Machine	untreated	1.50889	1.41467	1.76687	1.17451	1.47069	1.45287
Mother Machine	untreated	1.56916	1.04599	1.76687	1.17451	1.47069	1.14446
Mother Machine	untreated	1.37962	1.42901	1.63784	1.37075	1.50429	1.30433
Mother Machine	untreated	1.63158	1.10902	1.63784	1.9143	1.77607	0.96453
Mother Machine	untreated	1.44704	1.54759	1.47069	1.54411	1.5074	1.48723
Mother Machine	untreated	1.31094	1.61215	1.63717	1.23464	1.43591	1.48718
Mother Machine	untreated	1.37891	1.99773	1.77607	2.37482	2.07545	1.30119
Mother Machine	untreated	1.31427	1.42361	1.50429	1.25091	1.3776	1.36028
Mother Machine	untreated	1.50531	1.28317	1.43591	1.57472	1.50531	1.28317
Mother Machine	untreated	1.37587	1.99737	1.43591	1.45547	1.44569	1.92755
Mother Machine	untreated	1.45237	1.08794	1.50531	1.63863	1.57197	0.968337
Mother Machine	untreated	1.57542	1.43146	2.07545	1.97698	2.02621	0.980661
Mother Machine	untreated	1.63731	1.54357	2.02621	2.01867	2.02244	1.15844
Mother Machine	untreated	1.3724	1.55728	1.57556	1.57641	1.57598	1.3537
Mother Machine	untreated	1.44467	1.40889	1.57067	1.70492	1.6378	1.21577
Mother Machine	untreated	1.30671	1.61679	1.57067	1.43853	1.5046	1.4189
Mother Machine	untreated	1.37659	1.80569	1.6378	1.38714	1.51247	1.66981
Mother Machine	untreated	1.50344	1.30918	1.5046	2.14815	1.82638	0.986238
Mother Machine	untreated	1.37603	1.50464	1.5046	1.37785	1.44123	1.43944
Mother Machine	untreated	1.50209	1.62925	1.82638	1.96666	1.89652	1.23483
Mother Machine	untreated	1.44903	1.72779	1.82638	1.96402	1.8952	1.28161
Mother Machine	untreated	1.43698	1.55154	1.44123	1.96241	1.70182	1.2867
Mother Machine	untreated	1.51265	1.67078	1.70182	2.48973	2.09577	1.08765
Mother Machine	untreated	1.37718	1.62345	1.70182	1.69203	1.69692	1.3037
Mother Machine	untreated	1.63574	1.42204	2.09577	1.83141	1.96359	1.09419
Mother Machine	untreated	1.511	1.35656	2.09577	1.18511	1.64044	1.22712
Mother Machine	untreated	1.4446	1.41557	1.69692	2.09339	1.89516	0.965012
Mother Machine	untreated	1.45328	1.34814	1.69692	1.70723	1.70208	1.09934
Mother Machine	untreated	1.44083	1.61302	1.64044	1.6296	1.63502	1.41883
Mother Machine	untreated	1.37394	1.2942	1.70208	1.82752	1.7648	0.90334
Mother Machine	untreated	1.44467	1.40889	1.57067	1.70492	1.6378	1.21577
Mother Machine	untreated	1.30671	1.61679	1.57067	1.43853	1.5046	1.4189
Mother Machine	untreated	1.37659	1.80569	1.6378	1.38714	1.51247	1.66981
Mother Machine	untreated	1.50344	1.30918	1.5046	2.14815	1.82638	0.986238
Mother Machine	untreated	1.37603	1.50464	1.5046	1.37785	1.44123	1.43944
Mother Machine	untreated	1.50209	1.62925	1.82638	1.96666	1.89652	1.23483
Mother Machine	untreated	1.44903	1.72779	1.82638	1.96402	1.8952	1.28161
Mother Machine	untreated	1.43698	1.55154	1.44123	1.96241	1.70182	1.2867
Mother Machine	untreated	1.51265	1.67078	1.70182	2.48973	2.09577	1.08765
Mother Machine	untreated	1.37718	1.62345	1.70182	1.69203	1.69692	1.3037
Mother Machine	untreated	1.63574	1.42204	2.09577	1.83141	1.96359	1.09419
Mother Machine	untreated	1.511	1.35656	2.09577	1.18511	1.64044	1.22712
Mother Machine	untreated	1.4446	1.41557	1.69692	2.09339	1.89516	0.965012
Mother Machine	untreated	1.45328	1.34814	1.69692	1.70723	1.70208	1.09934
Mother Machine	untreated	1.44083	1.61302	1.64044	1.6296	1.63502	1.41883
Mother Machine	untreated	1.37394	1.2942	1.70208	1.82752	1.7648	0.90334
Mother Machine	untreated	1.50716	1.54324	2.02765	1.64324	1.83544	1.21496
Mother Machine	untreated	1.3766	1.74433	1.83544	1.82876	1.8321	1.28882
Mother Machine	untreated	1.37612	1.73529	1.509	1.62703	1.56801	1.5434
Mother Machine	untreated	1.37456	1.87672	1.509	2.15179	1.8304	1.42088
Mother Machine	untreated	1.44131	1.37107	1.82853	1.43764	1.63308	1.1793
Mother Machine	untreated	1.63976	1.55553	1.82853	1.70486	1.76669	1.4286
Mother Machine	untreated	1.44562	1.49002	1.76669	2.15689	1.96179	0.973846
Mother Machine	untreated	1.37838	1.42377	1.63308	1.50468	1.56888	1.23327
Mother Machine	untreated	1.37747	1.36145	1.63308	1.64479	1.63894	1.09999
Mother Machine	untreated	1.44807	1.80232	1.56801	2.22026	1.89414	1.35625
Mother Machine	untreated	1.38089	1.4852	1.63894	1.37676	1.50785	1.35824
Mother Machine	untreated	1.37888	1.17123	1.56888	1.44451	1.5067	1.04341
Mother Machine	untreated	1.44508	1.53891	1.56888	1.83186	1.70037	1.28362
Mother Machine	untreated	1.5722	1.02931	1.89414	1.76534	1.82974	0.771768
Mother Machine	untreated	1.70606	1.60866	1.89414	2.2759	2.08502	1.22969
Mother Machine	untreated	1.25278	1.67542	1.5067	2.15638	1.83154	1.09666
Mother Machine	untreated	1.3185	1.73534	1.5067	1.63299	1.56984	1.484
Mother Machine	untreated	1.63805	1.29638	2.08502	1.68099	1.88301	1.05143
Mother Machine	untreated	1.57045	1.29439	1.70037	1.58003	1.6402	1.22464
Mother Machine	untreated	1.44256	1.4869	1.70037	1.58333	1.64185	1.2876
Mother Machine	untreated	1.37646	1.33656	1.50189	1.9038	1.70285	1.01017
Mother Machine	untreated	1.30766	1.09286	1.70285	1.57101	1.63693	0.763589
Mother Machine	untreated	1.37064	1.55766	1.77501	1.50087	1.63794	1.29036
Mother Machine	untreated	1.76498	1.49546	1.70026	1.95866	1.82946	1.43097
Mother Machine	untreated	1.37971	1.21172	1.82946	0.929965	1.37971	1.21172
Mother Machine	untreated	1.31474	1.49232	1.37971	1.64191	1.51081	1.29625
Mother Machine	untreated	1.37521	1.62348	1.51081	1.63114	1.57098	1.42771
Mother Machine	untreated	1.44669	1.2128	1.57098	1.70177	1.63637	1.02312
Mother Machine	untreated	1.44318	1.23591	1.6996	1.70031	1.69996	0.979135
Mother Machine	untreated	1.37879	1.35509	1.6996	1.4385	1.56905	1.16483
Mother Machine	untreated	1.30879	1.35274	1.76614	1.49946	1.6328	1.02873
Mother Machine	untreated	1.44128	1.24011	1.77079	1.89531	1.83305	0.848344
Mother Machine	untreated	1.25228	1.68705	1.76206	2.03744	1.89975	1.03958
Mother Machine	untreated	1.37912	1.99724	1.76206	2.56068	2.16137	1.21499
Mother Machine	untreated	1.82468	1.35647	2.16137	1.63386	1.89761	1.28354
Mother Machine	untreated	1.50692	1.62125	1.89761	1.89035	1.89398	1.23419
Mother Machine	untreated	1.63297	1.54265	1.89761	2.2936	2.09561	1.08001
Mother Machine	untreated	1.38407	1.47805	2.09561	1.41822	1.75691	1.10521
Mother Machine	untreated	1.31569	2.00551	1.70051	1.97855	1.83953	1.48166
Mother Machine	untreated	1.701	1.36576	1.83953	2.20492	2.02222	1.04453
Mother Machine	untreated	1.57771	1.4742	1.83953	1.8163	1.82792	1.22399
Mother Machine	untreated	1.50698	1.42096	2.02222	1.89847	1.96035	0.967591
Mother Machine	untreated	1.3139	1.56001	1.70073	1.83098	1.76585	1.10806
Mother Machine	untreated	1.50573	1.41511	1.83965	1.68005	1.75985	1.161
Mother Machine	untreated	1.44155	1.16372	1.75985	1.24754	1.50369	1.10158
Mother Machine	untreated	1.38064	1.66848	2.02171	1.6444	1.83305	1.21606
Mother Machine	untreated	1.70195	1.50046	2.02171	2.02488	2.0233	1.17912
Mother Machine	untreated	1.37678	1.74912	1.90147	1.49089	1.69618	1.42973
Mother Machine	untreated	1.43887	1.81772	1.76715	2.02147	1.89431	1.36228
Mother Machine	untreated	1.50421	1.34596	1.76715	1.77253	1.76984	1.08033
Mother Machine	untreated	1.57616	1.02625	1.83305	1.84626	1.83966	0.762754
Mother Machine	untreated	1.37319	1.16183	1.83305	1.32419	1.57862	0.956391
Mother Machine	untreated	1.38271	1.14616	1.76984	1.37659	1.57322	0.955655
Mother Machine	untreated	1.31088	1.28909	1.76984	2.00764	1.88874	0.711228
Mother Machine	untreated	1.38006	1.54928	1.69618	1.57668	1.63643	1.29291
Mother Machine	untreated	1.70211	1.87263	1.69618	2.99662	2.3464	1.22835
Mother Machine	untreated	1.18365	1.86917	1.57862	1.95839	1.7685	1.28432
Mother Machine	untreated	1.37937	1.60365	1.83966	1.94874	1.8942	1.08882
Mother Machine	untreated	1.31347	1.36075	1.83966	1.44335	1.6415	1.03272
Mother Machine	untreated	1.63777	1.42564	1.63643	2.28515	1.96079	1.10262
Mother Machine	untreated	1.63565	1.4254	2.3464	1.70629	2.02635	1.03471
Mother Machine	untreated	1.96002	1.61729	2.3464	2.3446	2.3455	1.23181
Mother Machine	untreated	1.38444	1.29031	1.6415	1.7464	1.69395	0.980796
Mother Machine	untreated	1.37955	1.4247	1.6415	1.63452	1.63801	1.16624
Mother Machine	untreated	1.64218	1.46282	1.8942	1.90287	1.89853	1.20647
Mother Machine	untreated	1.38287	1.80575	1.8942	2.02774	1.96097	1.22766
Mother Machine	untreated	1.43971	1.34514	2.02635	1.51183	1.76909	1.01576
Mother Machine	untreated	1.50956	1.28734	2.02635	1.62621	1.82628	0.970621
Mother Machine	untreated	1.89765	1.60048	2.3455	2.20957	2.27754	1.22059
Mother Machine	untreated	1.18278	1.35836	1.69395	1.06171	1.37783	1.16331
Mother Machine	untreated	1.43612	1.42084	1.70423	1.44082	1.57253	1.28444
Mother Machine	untreated	1.3786	2.13958	1.50473	2.262	1.88337	1.63482
Mother Machine	untreated	1.37531	1.41966	1.82891	1.58302	1.70596	1.08901
Mother Machine	untreated	1.44213	1.35651	1.70596	1.5757	1.64083	1.15781
Mother Machine	untreated	1.82788	1.28983	1.88337	2.03816	1.96076	1.15695
Mother Machine	untreated	1.70405	1.46613	1.88337	1.77422	1.82879	1.34139
Mother Machine	untreated	1.37495	1.67659	1.96076	1.57011	1.76544	1.2861
Mother Machine	untreated	1.50542	1.28674	1.82879	1.69664	1.76272	1.02945
Mother Machine	untreated	1.44295	1.42246	1.76272	1.76602	1.76437	1.10104
Mother Machine	untreated	1.38027	1.42541	1.76272	1.38497	1.57384	1.23184
Mother Machine	untreated	1.43897	1.43507	1.57384	1.44259	1.50822	1.36583
Mother Machine	untreated	1.24603	1.55825	1.50573	1.64712	1.57642	1.22786
Mother Machine	untreated	1.38544	1.2936	1.57642	1.83583	1.70613	0.972919
Mother Machine	untreated	1.37657	1.60952	1.57642	1.69447	1.63545	1.35065
Mother Machine	untreated	1.44051	1.55688	1.76584	2.42412	2.09498	0.902404
Mother Machine	untreated	1.31361	1.67678	1.76584	1.77754	1.77169	1.2187
Mother Machine	untreated	1.50986	1.42551	2.09498	1.32105	1.70802	1.22735
Mother Machine	untreated	1.64459	1.03522	1.77169	1.77469	1.77319	0.906619
Mother Machine	untreated	1.50503	1.88024	1.77169	2.01706	1.89437	1.4909
Mother Machine	untreated	1.31335	1.55601	1.70802	1.69445	1.70123	1.16813
Mother Machine	untreated	1.5101	1.53445	1.70123	2.34305	2.02214	1.02241
Mother Machine	untreated	1.6416	0.970412	1.89864	1.24556	1.5721	1.03991
Mother Machine	untreated	1.38895	1.80818	1.89864	1.90149	1.90007	1.29707
Mother Machine	untreated	1.63773	1.67667	2.15492	1.75884	1.95688	1.35752
Mother Machine	untreated	1.50991	1.49115	1.90007	2.0033	1.95168	1.04937
Mother Machine	untreated	1.50531	1.92989	1.95688	1.97667	1.96677	1.46842
Mother Machine	untreated	1.51002	1.2264	1.95168	1.57452	1.7631	0.973318
Mother Machine	untreated	1.50713	1.73238	1.95168	1.9589	1.95529	1.28422
Mother Machine	untreated	1.44695	1.29467	1.96677	1.29867	1.63272	1.10889
Mother Machine	untreated	1.83353	1.41101	1.96677	2.21312	2.08995	1.15459
Mother Machine	untreated	1.37679	1.29695	1.95529	1.5874	1.77135	0.902394
Mother Machine	untreated	1.89434	1.74675	1.95529	2.48628	2.22078	1.4203
Mother Machine	untreated	1.50873	1.3463	2.02871	1.52723	1.77797	1.07705
Mother Machine	untreated	1.37719	1.6958	1.77797	1.88751	1.83274	1.24025
Mother Machine	untreated	1.37932	1.54416	1.7665	1.77303	1.76976	1.15372
Mother Machine	untreated	1.24622	1.6798	1.7665	1.64581	1.70615	1.21986
Mother Machine	untreated	1.44816	1.22799	1.76676	2.02101	1.89389	0.782261
Mother Machine	untreated	1.43931	1.23801	1.76976	1.90187	1.83582	0.841499
Mother Machine	untreated	1.25768	1.463	1.76063	1.50337	1.632	1.08868
Mother Machine	untreated	1.11975	1.67849	1.44684	1.7009	1.57387	1.22437
Mother Machine	untreated	1.31792	1.28739	1.76778	1.52222	1.645	0.960311
Mother Machine	untreated	1.31443	1.16546	1.45683	1.57675	1.51679	0.963096
Mother Machine	untreated	1.18589	1.36185	1.44089	1.82777	1.63433	0.913406
Mother Machine	untreated	1.24449	1.53114	1.76506	1.50454	1.6348	1.14082
Mother Machine	untreated	1.37698	1.35313	1.6348	1.61707	1.62594	1.10417
Mother Machine	untreated	1.31441	0.973181	1.7713	1.12204	1.44667	0.840918
Mother Machine	untreated	1.18341	1.46955	1.24633	1.77278	1.50956	1.14341
Mother Machine	untreated	1.05526	1.41901	1.24633	1.77554	1.51093	0.963336
Mother Machine	untreated	1.25281	1.03078	1.51019	1.38153	1.44586	0.83773
Mother Machine	untreated	1.25195	1.00893	1.50956	2.01211	1.76083	0.500051
Mother Machine	untreated	1.63869	1.16279	1.5041	1.89229	1.6982	1.10328
Mother Machine	untreated	1.44754	1.3016	1.43855	1.43844	1.43849	1.31065
Mother Machine	untreated	1.32247	1.46497	1.43855	1.95974	1.69914	1.0883
Mother Machine	untreated	1.38521	1.1656	1.63417	1.64861	1.64139	0.909423
Mother Machine	untreated	1.31248	1.09252	1.64139	1.86509	1.75324	0.651763
Mother Machine	untreated	1.17857	1.29536	1.64139	1.38658	1.51399	0.959938
Mother Machine	untreated	1.05177	1.54055	1.75324	1.27406	1.51365	1.07867
Mother Machine	untreated	1.17848	1.16832	1.51399	1.50326	1.50863	0.838168
Mother Machine	untreated	1.18602	1.80856	1.51365	1.37313	1.44339	1.55119
Mother Machine	untreated	1.18784	1.35373	1.70499	1.69713	1.70106	0.840509
Mother Machine	untreated	1.7683	1.59725	2.21268	2.60292	2.4078	0.957744
Mother Machine	untreated	1.3127	1.66681	2.21268	1.56786	1.89027	1.08924
Mother Machine	untreated	1.76653	1.36557	2.4078	2.04673	2.22727	0.904837
Mother Machine	untreated	1.51168	1.61733	2.4078	1.50791	1.95786	1.17115
Mother Machine	untreated	1.56715	1.35725	1.89027	2.29341	2.09184	0.832556
Mother Machine	untreated	1.43775	1.69571	2.22727	1.56484	1.89605	1.23741
Mother Machine	untreated	1.64141	1.67161	2.22727	2.08932	2.15829	1.15473
Mother Machine	untreated	1.70292	1.53719	2.15829	2.16215	2.16022	1.07988
Mother Machine	untreated	1.70537	1.35934	1.89605	2.28376	2.08991	0.974802
Mother Machine	untreated	1.44105	1.35931	1.89605	1.50394	1.7	1.10036
Mother Machine	untreated	1.63472	1.6775	2.16022	2.16716	2.16369	1.14853
Mother Machine	untreated	1.5114	1.34939	2.08991	1.3177	1.7038	1.15699
Mother Machine	untreated	1.38129	1.34501	1.7	1.70936	1.70468	1.02162
Mother Machine	untreated	1.57149	1.63364	1.7038	2.09679	1.9003	1.30484
Mother Machine	untreated	1.51166	1.79701	2.15977	1.23132	1.69554	1.61313
Mother Machine	untreated	1.5123	1.34891	1.69554	1.70754	1.70154	1.15967
Mother Machine	untreated	1.50684	1.2984	1.96181	1.45144	1.70663	1.09861
Mother Machine	untreated	1.57369	1.33236	1.96181	1.57227	1.76704	1.13901
Mother Machine	untreated	1.44655	1.2237	1.70154	1.82262	1.76208	0.908169
Mother Machine	untreated	1.44605	1.41092	1.70663	1.56243	1.63453	1.22244
Mother Machine	untreated	1.7683	1.59725	2.21268	2.60292	2.4078	0.957744
Mother Machine	untreated	1.3127	1.66681	2.21268	1.56786	1.89027	1.08924
Mother Machine	untreated	1.76653	1.36557	2.4078	2.04673	2.22727	0.904837
Mother Machine	untreated	1.51168	1.61733	2.4078	1.50791	1.95786	1.17115
Mother Machine	untreated	1.56715	1.35725	1.89027	2.29341	2.09184	0.832556
Mother Machine	untreated	1.43775	1.69571	2.22727	1.56484	1.89605	1.23741
Mother Machine	untreated	1.64141	1.67161	2.22727	2.08932	2.15829	1.15473
Mother Machine	untreated	1.70292	1.53719	2.15829	2.16215	2.16022	1.07988
Mother Machine	untreated	1.70537	1.35934	1.89605	2.28376	2.08991	0.974802
Mother Machine	untreated	1.44105	1.35931	1.89605	1.50394	1.7	1.10036
Mother Machine	untreated	1.63472	1.6775	2.16022	2.16716	2.16369	1.14853
Mother Machine	untreated	1.5114	1.34939	2.08991	1.3177	1.7038	1.15699
Mother Machine	untreated	1.38129	1.34501	1.7	1.70936	1.70468	1.02162
Mother Machine	untreated	1.57149	1.63364	1.7038	2.09679	1.9003	1.30484
Mother Machine	untreated	1.51166	1.79701	2.15977	1.23132	1.69554	1.61313
Mother Machine	untreated	1.5123	1.34891	1.69554	1.70754	1.70154	1.15967
Mother Machine	untreated	1.50684	1.2984	1.96181	1.45144	1.70663	1.09861
Mother Machine	untreated	1.57369	1.33236	1.96181	1.57227	1.76704	1.13901
Mother Machine	untreated	1.44655	1.2237	1.70154	1.82262	1.76208	0.908169
Mother Machine	untreated	1.44605	1.41092	1.70663	1.56243	1.63453	1.22244
Mother Machine	untreated	1.56846	2.0104	2.03021	2.02405	2.02713	1.55173
Mother Machine	untreated	1.31582	1.93819	1.51108	2.03954	1.77531	1.4787
Mother Machine	untreated	1.63821	1.42592	1.77531	1.8846	1.82995	1.23417
Mother Machine	untreated	1.58092	1.61493	1.77531	1.89339	1.83435	1.3615
Mother Machine	untreated	1.57645	1.23086	1.83111	1.57928	1.70519	1.10212
Mother Machine	untreated	1.37561	2.00876	1.70519	2.21742	1.96131	1.42306
Mother Machine	untreated	1.63359	1.29214	1.83435	1.82947	1.83191	1.09382
Mother Machine	untreated	1.50642	1.0907	1.83435	1.3615	1.59793	0.999197
Mother Machine	untreated	1.2554	1.09308	1.59793	1.15759	1.37776	0.970719
Mother Machine	untreated	1.57573	1.28956	1.83191	1.31167	1.57179	1.29351
Mother Machine	untreated	1.38254	1.22508	1.83191	0.933179	1.38254	1.22508
Mother Machine	untreated	1.51157	1.54644	1.57179	2.08741	1.8296	1.22841
Mother Machine	untreated	1.44805	1.47991	1.57179	1.31767	1.44473	1.48324
Mother Machine	untreated	1.30878	1.48239	1.44473	1.43352	1.43913	1.35205
Mother Machine	untreated	1.63516	1.09088	1.8296	1.84017	1.83489	0.891155
Mother Machine	untreated	1.44346	1.09013	1.8296	1.05143	1.44052	1.09307
Mother Machine	untreated	1.44156	1.28483	1.83395	1.58704	1.71049	1.0159
Mother Machine	untreated	1.50635	1.67185	1.70255	1.43778	1.57016	1.60804
Mother Machine	untreated	1.50695	1.50222	1.70255	1.56676	1.63466	1.37452
Mother Machine	untreated	1.04834	1.28444	1.44052	0.934385	1.18745	1.14533
Mother Machine	untreated	1.18008	1.67312	1.83489	0.662414	1.24865	1.60455
Mother Machine	untreated	1.50835	1.47801	1.83489	1.18562	1.51025	1.47611
Mother Machine	untreated	1.38228	0.963758	1.44052	1.84518	1.64285	0.703193
Mother Machine	untreated	1.70063	1.23177	1.57016	1.96544	1.7678	1.16459
Mother Machine	untreated	1.18617	1.74008	1.18745	2.09047	1.63896	1.28729
Mother Machine	untreated	1.24981	1.35427	1.64285	1.24896	1.4459	1.15817
Mother Machine	untreated	1.0436	1.31166	1.64285	1.50271	1.57278	0.782481
Mother Machine	untreated	1.38064	1.60355	1.7678	1.90825	1.83803	1.14617
Mother Machine	untreated	1.17814	1.49858	1.63896	1.50901	1.57398	1.10273
Mother Machine	untreated	1.12212	1.66814	1.57278	1.83517	1.70398	1.08629
Mother Machine	untreated	1.45444	1.79457	1.83803	2.20723	2.02263	1.22638
Mother Machine	untreated	1.50504	1.49107	1.83803	1.70274	1.77039	1.22573
Mother Machine	untreated	1.24875	1.87165	1.43995	2.08635	1.76315	1.35725
Mother Machine	untreated	1.3751	1.61525	1.89419	1.64233	1.76826	1.22209
Mother Machine	untreated	1.30767	1.42009	1.57404	1.6918	1.63292	1.09483
Mother Machine	untreated	1.38091	1.54125	1.63398	1.89831	1.76614	1.15602
Mother Machine	untreated	1.38526	1.669	1.63398	2.03032	1.83215	1.22211
Mother Machine	untreated	1.50952	1.34887	1.83215	1.82903	1.83059	1.0278
Mother Machine	untreated	1.38511	1.20969	1.50309	1.90088	1.70199	0.89282
Mother Machine	untreated	1.24856	1.6139	1.37717	2.16264	1.7699	1.09256
Mother Machine	untreated	1.38389	1.60562	1.7699	1.76679	1.76835	1.22116
Mother Machine	untreated	1.17908	1.48801	1.70199	1.83133	1.76666	0.900431
Mother Machine	untreated	1.24988	1.30039	1.70199	1.31234	1.50716	1.04311
Mother Machine	untreated	1.38172	1.35136	1.76666	1.50362	1.63514	1.09794
Mother Machine	untreated	1.18613	1.22094	1.63812	1.37646	1.50729	0.899782
Mother Machine	untreated	1.18526	1.22646	1.63812	1.50974	1.57393	0.837787
Mother Machine	untreated	1.44752	1.80019	1.57192	1.96622	1.76907	1.47864
Mother Machine	untreated	1.70495	1.53794	1.76907	2.41854	2.09381	1.14908
Mother Machine	untreated	1.44752	1.80019	1.57192	1.96622	1.76907	1.47864
Mother Machine	untreated	1.70495	1.53794	1.76907	2.41854	2.09381	1.14908
Mother Machine	untreated	1.25098	1.47881	1.51063	1.64186	1.57624	1.15354
Mother Machine	untreated	1.50466	1.0485	1.70159	1.23032	1.46596	1.08721
Mother Machine	untreated	1.50976	1.42484	1.57624	1.7017	1.63897	1.29563
Mother Machine	untreated	1.31249	1.36064	1.57624	1.44081	1.50853	1.16461
Mother Machine	untreated	1.31533	1.68147	1.63897	1.36686	1.50292	1.49389
Mother Machine	untreated	1.3753	1.4882	1.50853	1.37195	1.44024	1.42327
Mother Machine	untreated	1.44239	1.55305	1.44024	2.2265	1.83337	1.16208
Mother Machine	untreated	1.30944	1.47952	1.44024	1.56873	1.50448	1.28448
Mother Machine	untreated	1.43667	1.49702	1.50448	1.62721	1.56585	1.36785
Mother Machine	untreated	1.24541	1.47968	1.50448	2.42276	1.96362	0.761471
Mother Machine	untreated	1.50764	1.72411	1.8952	2.01619	1.9557	1.27606
Mother Machine	untreated	1.37553	1.61501	2.21571	1.18944	1.70258	1.28796
Mother Machine	untreated	1.44762	1.16802	1.63539	1.39211	1.51375	1.10189
Mother Machine	untreated	1.37848	1.62284	1.63539	1.89605	1.76572	1.2356
Mother Machine	untreated	1.64467	1.47953	1.76572	1.89141	1.82856	1.29564
Mother Machine	untreated	1.37469	1.82802	1.76572	1.63962	1.70267	1.50004
Mother Machine	untreated	1.57139	1.62643	1.82856	2.2403	2.03443	1.16338
Mother Machine	untreated	1.50532	1.68792	1.82856	2.08537	1.95697	1.23627
Mother Machine	untreated	1.63313	1.28715	1.70267	2.35254	2.02761	0.892679
Mother Machine	untreated	1.63846	1.41889	1.95697	1.83755	1.89726	1.16009
Mother Machine	untreated	1.31663	1.94083	2.02761	0.847714	1.43766	1.81979
Mother Machine	untreated	1.57731	1.53368	1.89726	2.27916	2.08821	1.02278
Mother Machine	untreated	1.57456	1.93455	1.89726	2.28531	2.09128	1.41783
Mother Machine	untreated	1.64005	1.29268	1.43766	1.81979	1.62873	1.30401
Mother Machine	untreated	1.95713	1.55077	2.09128	2.5945	2.34289	1.16501
Mother Machine	untreated	1.64074	1.28146	2.09128	1.69863	1.89496	1.02725
Mother Machine	untreated	1.95755	1.29436	2.34289	2.0924	2.21764	1.03426
Mother Machine	untreated	1.8328	1.21889	1.90064	1.89973	1.90019	1.1515
Mother Machine	untreated	1.64164	1.02902	1.83122	1.56086	1.69604	0.974617
Mother Machine	untreated	1.44382	1.55116	1.57737	1.83417	1.70577	1.28921
Mother Machine	untreated	1.38136	1.54372	1.57737	1.70159	1.63948	1.28559
Mother Machine	untreated	1.44336	1.54931	1.76571	1.76958	1.76765	1.22503
Mother Machine	untreated	1.24765	1.17775	1.76571	1.12091	1.44331	0.982094
Mother Machine	untreated	1.50748	1.67638	1.70577	1.94226	1.82401	1.35985
Mother Machine	untreated	1.50947	1.80437	1.70577	2.58158	2.14367	1.17017
Mother Machine	untreated	1.25178	1.79076	1.44331	2.08668	1.765	1.27754
Mother Machine	untreated	1.24388	1.24305	1.76765	0.845363	1.3065	1.18042
Mother Machine	untreated	1.64513	1.61555	1.82401	2.1959	2.00996	1.25073
Mother Machine	untreated	1.44883	1.41253	1.82401	1.58244	1.70323	1.15812
Mother Machine	untreated	1.50564	1.09139	2.14367	1.00029	1.57198	1.02505
Mother Machine	untreated	1.31125	1.85855	1.765	2.15585	1.96042	1.20937
Mother Machine	untreated	1.63837	1.33501	2.00996	1.51637	1.76316	1.21021
Mother Machine	untreated	1.70267	1.30177	2.00996	1.77616	1.89306	1.11138
Mother Machine	untreated	1.50609	1.414	1.96042	1.68643	1.82343	1.09666
Mother Machine	untreated	1.57449	2.13996	1.76316	1.75488	1.75902	1.95544
Mother Machine	untreated	1.44105	1.94234	1.89306	1.91047	1.90177	1.48162
Mother Machine	untreated	1.4509	1.35811	1.76316	1.64162	1.70239	1.10662
Mother Machine	untreated	1.44129	1.33687	1.70239	1.8419	1.77215	1.00601
Mother Machine	untreated	1.24276	1.81524	1.63975	1.51676	1.57826	1.47975
Mother Machine	untreated	1.5751	1.6074	1.83287	2.07622	1.95455	1.22796
Mother Machine	untreated	1.38007	1.78295	1.83287	1.69483	1.76385	1.39917
Mother Machine	untreated	1.50411	1.36375	1.69742	1.71065	1.70403	1.16383
Mother Machine	untreated	1.50609	1.8071	1.69742	1.96062	1.82902	1.48417
Mother Machine	untreated	1.50933	1.28817	1.76385	1.52306	1.64346	1.15404
Mother Machine	untreated	1.24558	1.62827	1.57826	1.69312	1.63569	1.23816
Mother Machine	untreated	1.57519	1.78718	1.95455	1.83644	1.89549	1.46688
Mother Machine	untreated	1.57772	1.46821	1.76385	1.75468	1.75927	1.28666
Mother Machine	untreated	1.50616	1.66638	1.70403	2.46361	2.08382	1.08872
Mother Machine	untreated	1.50616	1.27933	1.64346	1.50713	1.57529	1.21019
Mother Machine	untreated	1.2567	1.34297	1.64346	1.11221	1.37783	1.22184
Mother Machine	untreated	1.63488	1.54645	1.75927	1.76948	1.76437	1.41696
Mother Machine	untreated	1.38346	1.41319	1.37783	1.78006	1.57895	1.21771
Mother Machine	untreated	1.44464	1.67282	1.6315	2.04465	1.83807	1.27939
Mother Machine	untreated	1.56986	1.6248	1.83807	1.95153	1.8948	1.29986
Mother Machine	untreated	1.31103	1.35982	1.63037	1.63643	1.6334	1.03745
Mother Machine	untreated	1.37834	1.36898	1.57191	1.57093	1.57142	1.1759
Mother Machine	untreated	1.30901	1.68927	1.82691	1.96531	1.89611	1.10217
Mother Machine	untreated	1.37756	1.87019	1.63535	2.42711	2.03123	1.21652
Mother Machine	untreated	1.51114	1.73667	2.03123	1.89541	1.96332	1.28449
Mother Machine	untreated	1.3782	1.467	1.64157	1.6301	1.63583	1.20936
Mother Machine	untreated	1.69697	1.1613	1.96332	1.44377	1.70354	1.15472
Mother Machine	untreated	1.45022	2.22727	1.63583	2.664	2.14992	1.52757
Mother Machine	untreated	1.12703	1.15932	1.3833	1.2456	1.31445	0.971893
Mother Machine	untreated	1.57629	1.73356	1.90085	2.1528	2.02682	1.28304
Mother Machine	untreated	1.5077	1.16379	2.02682	1.37919	1.703	0.968486
Mother Machine	untreated	1.64038	1.42401	2.02682	2.423	2.22491	0.839474
Mother Machine	untreated	1.44846	2.18828	2.22491	1.95654	2.09073	1.54601
Mother Machine	untreated	1.37622	1.55756	1.703	1.82286	1.76293	1.17084
Mother Machine	untreated	1.30606	1.88848	1.69502	2.10038	1.8977	1.29684
Mother Machine	untreated	1.31625	1.36514	1.69502	1.83667	1.76584	0.915544
Mother Machine	untreated	1.3809	1.21846	1.7033	2.214	1.95865	0.640714
Mother Machine	untreated	1.63451	1.42532	1.8977	2.15032	2.02401	1.03582
Mother Machine	untreated	1.50627	1.31219	1.8977	1.24414	1.57092	1.24753
Mother Machine	untreated	1.5035	1.37326	2.02401	1.9092	1.9666	0.910157
Mother Machine	untreated	1.51137	1.92454	2.02401	1.64035	1.83218	1.60373
Mother Machine	untreated	1.63438	1.35489	1.83218	1.43659	1.63438	1.35489
Mother Machine	untreated	1.50884	1.74403	1.70615	2.33905	2.0226	1.23027
Mother Machine	untreated	1.50855	1.48052	1.64437	2.66007	2.15222	0.836853
Mother Machine	untreated	1.57192	1.03443	2.15222	1.24837	1.7003	0.906047
Mother Machine	untreated	1.50988	1.45745	1.7003	1.82873	1.76451	1.20282
Mother Machine	untreated	1.3119	1.3611	1.76451	1.65319	1.70885	0.964151
Mother Machine	untreated	1.5139	1.28877	1.76451	1.63756	1.70104	1.10164
Mother Machine	untreated	1.37973	1.54234	1.70885	2.3495	2.02917	0.892897
Mother Machine	untreated	1.31245	1.67526	1.70885	1.95124	1.83005	1.15766
Mother Machine	untreated	1.5123	1.21913	1.63938	1.38382	1.5116	1.21983
Mother Machine	untreated	1.17958	1.28834	1.5116	1.51494	1.51327	0.954656
Mother Machine	untreated	1.18718	1.54987	1.51327	1.75389	1.63358	1.10347
Mother Machine	untreated	1.31989	1.54096	1.63425	1.76196	1.69811	1.16275
Mother Machine	untreated	1.37148	1.54653	1.63425	2.15096	1.89261	1.02541
Mother Machine	untreated	1.3167	1.4305	1.6411	1.6409	1.641	1.1062
Mother Machine	untreated	1.44158	1.46051	1.6411	1.87969	1.7604	1.1417
Mother Machine	untreated	1.50794	1.93319	1.70378	2.47865	2.09122	1.34991
Mother Machine	untreated	1.70273	1.53154	1.97258	1.81692	1.89475	1.33952
Mother Machine	untreated	1.3758	1.80058	1.44785	1.68512	1.56648	1.6099
Mother Machine	untreated	1.31761	1.22256	1.44785	1.69478	1.57131	0.968855
Mother Machine	untreated	1.38142	1.29579	1.57131	1.83056	1.70094	0.97627
Mother Machine	untreated	1.31945	1.78996	1.65296	2.39916	2.02606	1.08335
Mother Machine	untreated	1.51103	1.27123	1.65296	1.89373	1.77335	1.00891
Mother Machine	untreated	1.24841	1.88435	1.77335	1.90404	1.83869	1.29406
Mother Machine	untreated	1.50993	2.2461	1.77335	2.26848	2.02091	1.73512
Mother Machine	untreated	1.5748	1.03625	2.02606	1.24478	1.63542	0.975635
Mother Machine	untreated	1.50532	1.35469	2.02606	2.15919	2.09262	0.767388
Mother Machine	untreated	1.31358	2.06077	2.09262	1.57564	1.83413	1.54021
Mother Machine	untreated	1.51187	1.66241	1.83869	1.71146	1.77508	1.3992
Mother Machine	untreated	1.7013	2.01472	1.83869	3.12422	2.48146	1.23457
Mother Machine	untreated	1.63854	1.80758	1.90107	2.28552	2.09329	1.35283
Mother Machine	untreated	1.56859	1.6147	1.96097	1.96269	1.96183	1.22147
Mother Machine	untreated	1.63854	1.80758	1.90107	2.28552	2.09329	1.35283
Mother Machine	untreated	1.56859	1.6147	1.96097	1.96269	1.96183	1.22147
Mother Machine	untreated	1.57213	1.67847	2.09471	1.17409	1.6344	1.6162
Mother Machine	untreated	1.50828	1.8148	1.70457	1.9542	1.82938	1.4937
Mother Machine	untreated	1.50045	1.43148	1.70457	1.56979	1.63718	1.29475
Mother Machine	untreated	1.5056	1.62641	1.6344	1.77738	1.70589	1.42612
Mother Machine	untreated	1.57311	1.2851	1.63718	1.76471	1.70094	1.15727
Mother Machine	untreated	1.63803	2.01447	1.82938	2.46868	2.14903	1.50347
Mother Machine	untreated	1.57089	1.49132	1.82938	1.82851	1.82895	1.23327
Mother Machine	untreated	1.57612	1.35589	1.82895	1.69288	1.76091	1.1711
Mother Machine	untreated	1.44423	1.46378	1.82895	1.31663	1.57279	1.33522
Mother Machine	untreated	1.96173	1.40968	2.14903	1.87674	2.01289	1.35852
Mother Machine	untreated	1.63894	1.40649	2.14903	1.2513	1.70017	1.34526
Mother Machine	untreated	1.57215	1.68836	1.70017	2.21974	1.95995	1.30056
Mother Machine	untreated	1.51012	1.7993	1.70017	2.21136	1.95576	1.35365
Mother Machine	untreated	1.37003	1.44132	1.76091	1.24043	1.50067	1.31068
Mother Machine	untreated	1.70202	1.75312	1.95995	2.34028	2.15012	1.30503
Mother Machine	untreated	1.70909	1.1597	1.95576	1.57546	1.76561	1.10318
Mother Machine	untreated	1.69999	1.35687	1.95576	1.59173	1.77375	1.28312
Mother Machine	untreated	1.57219	1.43473	1.77375	1.76149	1.76762	1.2393
Mother Machine	untreated	1.43876	1.74273	1.77375	1.63537	1.70456	1.47693
Mother Machine	untreated	1.50816	1.56322	1.76762	1.88427	1.82594	1.24545
Mother Machine	untreated	1.5765	1.67112	1.76762	1.88774	1.82768	1.41994
Mother Machine	untreated	1.3773	1.48934	1.70456	1.69362	1.69909	1.16755
Mother Machine	untreated	1.50665	1.4324	1.82594	1.83052	1.82823	1.11082
Mother Machine	untreated	1.63692	1.75792	1.82768	2.08607	1.95687	1.43796
Mother Machine	untreated	1.57096	1.87115	1.82768	1.98519	1.90643	1.53568
Mother Machine	untreated	1.50869	2.05063	1.82823	2.49608	2.16215	1.39717
Mother Machine	untreated	1.45168	1.46364	1.82823	1.83796	1.8331	1.08223
Mother Machine	untreated	1.70467	1.59496	1.95687	1.97418	1.96553	1.3341
Mother Machine	untreated	1.50742	1.73268	1.8331	2.08226	1.95768	1.28242
Mother Machine	untreated	1.37464	1.74761	1.8331	1.6948	1.76395	1.3583
Mother Machine	untreated	1.44131	1.94506	1.96553	2.46876	2.21714	1.16923
Mother Machine	untreated	1.83714	1.55343	1.96553	2.48484	2.22518	1.16538
Mother Machine	untreated	1.57383	1.17309	1.76395	2.17408	1.96902	0.777903
Mother Machine	untreated	1.50496	1.43585	1.76395	1.64019	1.70207	1.23874
Mother Machine	untreated	1.24437	1.49059	1.57094	1.58889	1.57992	1.15504
Mother Machine	untreated	1.44641	1.6683	1.57992	2.08028	1.8301	1.28461
Mother Machine	untreated	1.44196	1.35454	1.8301	1.31041	1.57026	1.22624
Mother Machine	untreated	1.37957	1.53844	1.57026	1.84021	1.70523	1.21278
Mother Machine	untreated	1.37982	1.56023	1.70523	1.4407	1.57297	1.36709
Mother Machine	untreated	1.51592	1.5513	1.57297	1.83574	1.70436	1.36287
Mother Machine	untreated	1.57781	1.65597	1.57297	1.95463	1.7638	1.46998
Mother Machine	untreated	1.63415	1.22379	1.95879	1.70499	1.83189	1.02605
Mother Machine	untreated	1.57014	1.54661	1.83189	1.96828	1.90009	1.21666
Mother Machine	untreated	1.70179	1.29123	1.89742	1.76717	1.83229	1.16073
Mother Machine	untreated	1.642	1.7884	1.89742	1.76448	1.83095	1.59945
Mother Machine	untreated	1.31326	1.61617	1.70189	1.57593	1.63891	1.29052
Mother Machine	untreated	1.37683	1.54011	1.70189	1.81993	1.76091	1.15603
Mother Machine	untreated	1.57749	1.54054	1.83229	1.84529	1.83879	1.27924
Mother Machine	untreated	1.37401	1.29328	1.83229	1.31376	1.57303	1.09427
Mother Machine	untreated	1.37885	1.35976	1.76091	1.63351	1.69721	1.0414
Mother Machine	untreated	1.44282	1.28155	1.76091	1.39028	1.5756	1.14878
Mother Machine	untreated	1.44104	1.5634	1.63891	1.07781	1.35836	1.64608
Mother Machine	untreated	1.30813	1.68825	1.63891	1.11933	1.37912	1.61726
Mother Machine	untreated	1.25002	1.28946	1.5756	1.42971	1.50265	1.03682
Mother Machine	untreated	1.30965	1.2924	1.5756	1.56154	1.56857	1.03348
Mother Machine	untreated	1.37507	1.36945	1.37912	1.49773	1.43843	1.30609
Mother Machine	untreated	1.30747	1.30898	1.56857	1.70998	1.63927	0.977177
Mother Machine	untreated	1.31715	1.68807	1.50265	1.77017	1.63641	1.36881
Mother Machine	untreated	1.50552	1.62202	1.63641	1.5029	1.56966	1.55788
Mother Machine	untreated	1.38174	1.49402	1.45425	1.56063	1.50744	1.36832
Mother Machine	untreated	1.31348	1.74507	1.45425	2.20112	1.82769	1.23086
Mother Machine	untreated	1.38095	1.46916	1.50744	1.63154	1.56949	1.28062
Mother Machine	untreated	1.45078	1.30451	1.50744	2.14799	1.82771	0.927581
Mother Machine	untreated	1.3814	1.49254	1.82769	1.32531	1.5765	1.29745
Mother Machine	untreated	1.56906	1.7458	1.82769	1.82347	1.82558	1.48929
Mother Machine	untreated	1.50997	1.75016	1.56949	1.96098	1.76523	1.4949
Mother Machine	untreated	1.44491	1.72918	1.5765	2.59344	2.08497	1.08912
Mother Machine	untreated	1.70599	1.80609	2.02444	2.40959	2.21701	1.29506
Mother Machine	untreated	1.44074	2.15026	2.02444	1.76691	1.89567	1.69532
Mother Machine	untreated	1.89617	1.16806	1.89567	1.55345	1.72456	1.33966
Mother Machine	untreated	1.64166	0.958855	1.89567	1.55345	1.72456	0.875957
Mother Machine	untreated	1.50687	1.55961	1.72456	2.19689	1.96073	1.10576
Mother Machine	untreated	1.25015	1.86472	1.72456	1.67436	1.69946	1.41541
Mother Machine	untreated	1.25089	1.67428	1.72456	1.80663	1.7656	1.15957
Mother Machine	untreated	1.44469	1.55743	1.69946	1.70276	1.70111	1.301
Mother Machine	untreated	1.44536	1.43039	1.70111	1.96296	1.83203	1.04371
Mother Machine	untreated	1.4418	1.67545	1.70212	1.70789	1.70501	1.41225
Mother Machine	untreated	1.37935	1.85802	1.70212	1.72348	1.7128	1.52456
Mother Machine	untreated	1.31143	1.67295	1.83203	1.83429	1.83316	1.15122
Mother Machine	untreated	1.50186	1.81499	1.70501	1.56977	1.63739	1.67945
Mother Machine	untreated	1.63816	1.21609	1.7128	1.55066	1.63173	1.22252
Mother Machine	untreated	1.63331	1.61678	1.63739	2.29642	1.9669	1.28318
Mother Machine	untreated	1.44071	1.6933	1.5053	2.15158	1.82844	1.30557
Mother Machine	untreated	1.57878	1.23129	1.82844	1.44567	1.63705	1.17302
Mother Machine	untreated	1.44075	1.43526	1.82844	1.70905	1.76874	1.10726
Mother Machine	untreated	1.57491	1.72726	1.7642	2.15654	1.96037	1.34181
Mother Machine	untreated	1.24163	2.07589	1.63705	2.4017	2.01938	1.29815
Mother Machine	untreated	1.5085	1.55371	1.76874	2.15093	1.95984	1.10237
Mother Machine	untreated	1.50998	1.47162	1.76874	1.5047	1.63672	1.34488
Mother Machine	untreated	1.51143	1.41805	2.01938	1.51762	1.7685	1.16098
Mother Machine	untreated	1.70085	1.85744	2.01938	2.56251	2.29094	1.26735
Mother Machine	untreated	1.63967	1.48724	1.95984	1.70197	1.83091	1.29601
Mother Machine	untreated	1.70097	1.60278	2.29094	1.63043	1.96068	1.34306
Mother Machine	untreated	1.76895	1.85421	1.96068	2.08545	2.02307	1.60009
Mother Machine	untreated	1.77238	1.469	2.41245	1.5143	1.96337	1.27801
Mother Machine	untreated	1.44121	1.67729	1.83122	1.81814	1.82468	1.29382
Mother Machine	untreated	1.31018	1.82354	1.83122	2.22925	2.03023	1.10348
Mother Machine	untreated	1.4422	1.48703	1.82468	1.96983	1.89725	1.03197
Mother Machine	untreated	1.51031	1.75569	1.82468	2.10042	1.96255	1.30345
Mother Machine	untreated	1.57348	1.54142	2.03023	1.77487	1.90255	1.21235
Mother Machine	untreated	1.3745	1.87316	1.89725	1.76611	1.83168	1.41598
Mother Machine	untreated	1.50762	1.30001	1.89725	1.38864	1.64295	1.16468
Mother Machine	untreated	1.439	1.67361	1.90255	2.02304	1.9628	1.14981
Mother Machine	untreated	1.57386	1.35114	1.90255	1.76087	1.83171	1.09329
Mother Machine	untreated	1.44395	1.99818	1.64295	2.1464	1.89467	1.54746
Mother Machine	untreated	1.38028	1.68324	1.64295	2.00742	1.82518	1.23834
Mother Machine	untreated	1.44248	1.62259	1.83171	2.34046	2.08609	0.978987
Mother Machine	untreated	1.50885	1.67425	1.82518	1.83359	1.82938	1.35372
Mother Machine	untreated	1.44724	1.47941	1.82518	1.71028	1.76773	1.15892
Mother Machine	untreated	1.63364	1.61125	1.95757	1.97613	1.96685	1.27803
Mother Machine	untreated	1.63214	1.4363	1.95757	1.5786	1.76809	1.30035
Mother Machine	untreated	1.57608	1.66197	1.76809	1.62855	1.69832	1.53972
Mother Machine	untreated	1.70117	1.35689	1.96685	2.07994	2.0234	1.03467
Mother Machine	untreated	1.57138	1.37217	1.69832	1.96306	1.83069	1.11285
Mother Machine	untreated	1.57183	1.62165	1.69832	2.0939	1.89611	1.29736
Mother Machine	untreated	1.44499	1.46753	2.0234	1.76904	1.89622	1.0163
Mother Machine	untreated	1.50276	1.82626	1.83069	2.09502	1.96286	1.36616
Mother Machine	untreated	1.57213	0.83671	1.89611	1.63398	1.76504	0.643796
Mother Machine	untreated	1.64239	1.81438	1.96286	2.2146	2.08873	1.36803
Mother Machine	untreated	1.63427	1.62354	1.96286	2.08164	2.02225	1.23556
Mother Machine	untreated	1.83542	1.82377	2.08873	2.3456	2.21716	1.44203
Mother Machine	untreated	1.63802	1.61767	2.08873	2.22632	2.15752	1.09817
Mother Machine	untreated	1.96848	1.61215	2.21716	2.48312	2.35014	1.23049
Mother Machine	untreated	1.70399	1.27344	2.21716	1.43275	1.82496	1.15248
Mother Machine	untreated	1.70265	2.00839	2.35014	2.10341	2.22678	1.48426
Mother Machine	untreated	1.37185	1.63214	1.8287	2.0975	1.9631	1.04089
Mother Machine	untreated	1.43987	1.48858	1.8287	1.70482	1.76676	1.16169
Mother Machine	untreated	1.56953	1.47487	2.22678	1.69246	1.95962	1.08478
Mother Machine	untreated	1.37453	1.69288	1.76676	1.90399	1.83538	1.23203
Mother Machine	untreated	1.44482	1.67989	1.76676	1.63853	1.70265	1.42207
Mother Machine	untreated	1.57451	1.86517	1.70265	1.81927	1.76096	1.67872
Mother Machine	untreated	1.517	1.47896	1.70265	1.70579	1.70422	1.29173
Mother Machine	untreated	1.5066	1.8559	1.70422	2.09315	1.89868	1.46382
Mother Machine	untreated	1.43602	1.69195	1.70422	1.70129	1.70276	1.42521
Mother Machine	untreated	1.69844	1.60812	2.28747	1.63524	1.96136	1.3452
Mother Machine	untreated	1.70007	1.55315	1.89868	2.66867	2.28368	0.969539
Mother Machine	untreated	1.25265	1.10444	1.64324	1.37839	1.51081	0.846287
Mother Machine	untreated	1.11827	1.56311	1.51081	1.62703	1.56892	1.11247
Mother Machine	untreated	1.4377	1.49257	1.83472	1.44188	1.6383	1.29196
Mother Machine	untreated	1.44364	1.42753	1.83472	1.56621	1.70047	1.1707
Mother Machine	untreated	1.50927	1.36504	1.6383	1.89096	1.76463	1.10968
Mother Machine	untreated	1.44572	1.42618	1.70047	1.82923	1.76485	1.10705
Mother Machine	untreated	1.44427	1.6538	1.70047	1.56967	1.63507	1.463
Mother Machine	untreated	1.44304	1.42605	1.76485	1.49623	1.63054	1.23855
Mother Machine	untreated	1.37483	1.34253	1.63507	1.37892	1.50699	1.21037
Mother Machine	untreated	1.5741	1.09701	1.63507	1.5153	1.57518	1.09593
Mother Machine	untreated	1.37541	1.48549	1.57518	1.83437	1.70477	1.15613
Mother Machine	untreated	1.25106	1.43266	1.57518	1.57899	1.57709	1.10663
Mother Machine	untreated	1.38432	1.28649	1.50699	1.77139	1.63919	1.03162
Mother Machine	untreated	1.45172	1.538	1.70477	1.83984	1.77231	1.21741
Mother Machine	untreated	1.37971	1.47573	1.57339	1.70644	1.63991	1.21553
Mother Machine	untreated	1.50915	1.61115	1.70517	1.43317	1.56917	1.55113
Mother Machine	untreated	1.5726	1.55451	1.62779	1.77891	1.70335	1.42376
Mother Machine	untreated	1.37239	1.49677	1.56917	1.7104	1.63979	1.22938
Mother Machine	untreated	1.25125	1.35876	1.56917	1.44971	1.50944	1.10056
Mother Machine	untreated	1.57075	1.61384	1.82963	2.10335	1.96649	1.21809
Mother Machine	untreated	1.76491	1.40486	2.09354	2.21776	2.15565	1.01412
Mother Machine	untreated	1.57434	1.87371	2.09354	1.58381	1.83867	1.60938
Mother Machine	untreated	1.57531	1.36606	2.15565	1.75624	1.95594	0.985424
Mother Machine	untreated	1.57211	1.60476	2.15565	1.8998	2.02772	1.14914
Mother Machine	untreated	1.63581	1.36526	1.83867	1.82696	1.83282	1.16825
Mother Machine	untreated	1.76898	1.14814	1.83867	1.69929	1.76898	1.14814
Mother Machine	untreated	1.51232	1.6825	1.83282	1.70946	1.77114	1.42368
Mother Machine	untreated	1.37524	1.62713	1.83282	1.71286	1.77284	1.22954
Mother Machine	untreated	1.51408	1.53753	1.76898	1.8906	1.82979	1.22182
Mother Machine	untreated	1.50469	1.42766	1.89504	2.02901	1.96202	0.970324
Mother Machine	untreated	1.63796	1.99084	1.76735	2.01954	1.89344	1.73536
Mother Machine	untreated	1.24551	1.68465	1.63419	1.37901	1.5066	1.42355
Mother Machine	untreated	1.37875	1.68142	1.70439	1.70482	1.70461	1.35557
Mother Machine	untreated	1.51237	1.48082	1.70439	1.55436	1.62937	1.36383
Mother Machine	untreated	1.56883	1.69462	1.70461	2.34379	2.0242	1.23926
Mother Machine	untreated	1.44349	1.60885	1.62937	1.89874	1.76406	1.28829
Mother Machine	untreated	1.5067	1.48836	2.0242	2.0269	2.02555	0.969517
Mother Machine	untreated	1.44118	1.5607	2.02555	1.37425	1.6999	1.30199
Mother Machine	untreated	1.5075	1.49275	1.90335	1.75309	1.82822	1.17203
Mother Machine	untreated	1.63991	1.21262	2.0265	1.2463	1.6364	1.21614
Mother Machine	untreated	1.37548	1.68006	1.6364	2.15695	1.89668	1.15887
Mother Machine	untreated	1.44632	1.35043	1.89668	1.77067	1.83367	0.963074
Mother Machine	untreated	1.37641	1.62271	1.83367	1.57065	1.70216	1.29697
Mother Machine	untreated	1.51537	1.85989	1.70216	2.10242	1.90229	1.47297
Mother Machine	untreated	1.37956	1.61546	1.76433	2.02366	1.89399	1.10103
Mother Machine	untreated	1.50902	1.87675	1.89399	2.28652	2.09025	1.29552
Mother Machine	untreated	1.63425	1.80774	2.09025	2.08867	2.08946	1.35253
Mother Machine	untreated	1.50409	1.41554	2.08946	1.70622	1.89784	1.02178
Mother Machine	untreated	1.7688	1.48841	2.08946	1.82389	1.95668	1.30054
Mother Machine	untreated	1.63905	1.22511	1.95668	1.58191	1.76929	1.09487
Mother Machine	untreated	1.70338	1.46536	1.88885	2.16339	2.02612	1.14262
Mother Machine	untreated	1.44223	1.16254	1.88885	1.5219	1.70538	0.899389
Mother Machine	untreated	1.30713	1.34594	1.57344	1.70242	1.63793	1.01514
Mother Machine	untreated	1.37622	1.62639	1.70538	1.83192	1.76865	1.23397
Mother Machine	untreated	1.50648	1.74723	2.02612	1.7695	1.89781	1.3559
Mother Machine	untreated	1.30894	1.24136	1.76865	1.50578	1.63721	0.913081
Mother Machine	untreated	1.574	1.61835	1.76865	2.66643	2.21754	0.97481
Mother Machine	untreated	1.63503	1.50066	1.89781	1.90042	1.89911	1.23657
Mother Machine	untreated	1.37359	1.81282	1.89911	1.63018	1.76464	1.42177
Mother Machine	untreated	1.38038	1.73361	1.50536	1.90868	1.70702	1.40697
Mother Machine	untreated	1.31409	1.35012	1.50536	1.23931	1.37234	1.29188
Mother Machine	untreated	1.31128	1.3023	1.57068	1.56975	1.57021	1.04336
Mother Machine	untreated	1.37908	1.61953	1.37234	2.0401	1.70622	1.29239
Mother Machine	untreated	1.44795	1.61807	1.70702	1.57227	1.63965	1.42638
Mother Machine	untreated	1.57143	1.29446	1.63965	1.50321	1.57143	1.29446
Mother Machine	untreated	1.51345	1.34687	1.63965	1.38726	1.51345	1.34687
Mother Machine	untreated	1.24404	1.54827	1.70622	1.81249	1.75935	1.03295
Mother Machine	untreated	1.44256	1.62253	1.51345	1.88637	1.69991	1.36518
Mother Machine	untreated	1.57651	1.35983	1.63886	1.89403	1.76645	1.1699
Mother Machine	untreated	1.5063	1.54203	1.63886	1.77413	1.7065	1.34183
Mother Machine	untreated	1.51022	1.73616	1.63221	2.30007	1.96614	1.28025
Mother Machine	untreated	1.44193	1.53153	1.7065	1.56664	1.63657	1.3369
Mother Machine	untreated	1.70377	1.15231	1.96614	1.56194	1.76404	1.09205
Mother Machine	untreated	1.57347	1.47783	1.96614	1.56454	1.76534	1.28596
Mother Machine	untreated	1.51219	1.9445	1.76404	1.37277	1.5684	1.88829
Mother Machine	untreated	1.37572	1.29586	1.76534	1.11031	1.43783	1.23375
Mother Machine	untreated	1.31604	1.36245	1.43783	1.58632	1.51207	1.16641
Mother Machine	untreated	1.24724	1.47791	1.43783	1.9611	1.69946	1.02569
Mother Machine	untreated	1.2494	1.55725	1.51207	1.63829	1.57518	1.23147
Mother Machine	untreated	1.25507	1.61338	1.69946	1.70901	1.70424	1.16421
Mother Machine	untreated	1.63944	1.55546	1.7716	1.89024	1.83092	1.36398
Mother Machine	untreated	1.51598	0.82295	1.70798	1.30666	1.50732	0.83161
Mother Machine	untreated	1.18385	1.6017	1.50732	1.62997	1.56864	1.21691
Mother Machine	untreated	1.31172	2.12928	1.56864	1.97091	1.76978	1.67123
Mother Machine	untreated	1.77001	1.23332	1.76978	2.02073	1.89525	1.10807
Mother Machine	untreated	1.37455	1.68794	1.89525	0.987273	1.44126	1.62122
Mother Machine	untreated	1.57448	1.41509	1.89525	1.88756	1.89141	1.09816
Mother Machine	untreated	1.38272	1.86886	1.89141	1.76408	1.82775	1.42383
Mother Machine	untreated	1.50567	1.20405	1.82775	1.32602	1.57688	1.13283
Mother Machine	untreated	1.70344	1.80077	1.82775	1.69449	1.76112	1.74309
Mother Machine	untreated	1.38557	1.66173	1.57688	1.95201	1.76445	1.28286
Mother Machine	untreated	1.57209	1.41386	1.76112	2.27975	2.02044	0.965514
Mother Machine	untreated	1.50509	1.24031	2.02044	1.49842	1.75943	0.985977
Mother Machine	untreated	1.5085	1.41733	1.76445	1.90104	1.83274	1.09309
Mother Machine	untreated	1.3168	1.80066	1.75943	1.77472	1.76707	1.35038
Mother Machine	untreated	1.57005	1.62069	1.76707	2.29104	2.02906	1.16168
Mother Machine	untreated	1.18205	1.68934	1.90194	1.24721	1.57458	1.29681
Mother Machine	untreated	1.17711	1.48338	1.90194	1.11886	1.5104	1.15009
Mother Machine	untreated	1.38323	1.40621	2.16492	0.985981	1.57545	1.214
Mother Machine	untreated	1.30675	1.55687	1.69594	1.58595	1.64094	1.22267
Mother Machine	untreated	1.31715	2.00311	1.96837	1.95188	1.96013	1.36013
Mother Machine	untreated	1.70106	1.6887	1.70957	1.93713	1.82335	1.56642
Mother Machine	untreated	1.56699	1.74354	1.57078	2.48348	2.02713	1.2834
Mother Machine	untreated	1.50469	1.47945	1.57078	1.57615	1.57347	1.41067
Mother Machine	untreated	1.50479	1.09784	1.57347	1.30543	1.43945	1.16318
Mother Machine	untreated	1.44219	1.42439	1.76338	1.51804	1.64071	1.22587
Mother Machine	untreated	1.38325	1.74668	1.76338	1.89891	1.83114	1.29878
Mother Machine	untreated	1.43799	1.36226	1.64071	2.14709	1.8939	0.906354
Mother Machine	untreated	1.37835	1.4928	1.64071	1.63239	1.63655	1.23461
Mother Machine	untreated	1.5008	1.49051	1.83114	1.56124	1.69619	1.29512
Mother Machine	untreated	1.56913	1.8242	1.83114	1.94792	1.88953	1.5038
Mother Machine	untreated	1.3818	2.02149	1.8939	1.64958	1.77174	1.63155
Mother Machine	untreated	1.44555	1.55498	1.63655	1.76508	1.70082	1.29971
Mother Machine	untreated	1.3777	1.40607	1.70082	1.69703	1.69892	1.08484
Mother Machine	untreated	1.43908	1.59912	1.70082	1.57025	1.63554	1.40267
Mother Machine	untreated	1.44085	1.53717	1.63554	1.63134	1.63344	1.34458
Mother Machine	untreated	1.57363	1.75373	1.63554	1.88884	1.76219	1.56518
Mother Machine	untreated	1.57268	1.1621	1.63344	1.50461	1.56902	1.16576
Mother Machine	untreated	1.63623	1.22437	1.76219	1.56518	1.66368	1.19692
Mother Machine	untreated	1.45087	1.66642	1.66368	1.98972	1.8267	1.2906
Mother Machine	untreated	1.44539	1.73201	1.66368	1.98882	1.82625	1.35115
Mother Machine	untreated	1.57267	1.4699	1.82625	1.70506	1.76565	1.27692
Mother Machine	untreated	1.44846	1.42846	1.7042	1.56808	1.63614	1.24077
Mother Machine	untreated	1.51042	1.48984	1.7042	1.70328	1.70374	1.29651
Mother Machine	untreated	1.70401	1.54051	1.97029	2.34586	2.15807	1.08645
Mother Machine	untreated	1.37661	1.43018	1.97029	1.6975	1.83389	0.972889
Mother Machine	untreated	1.57189	1.48788	1.63614	2.41563	2.02589	1.03389
Mother Machine	untreated	1.70995	1.6027	2.15807	1.76256	1.96032	1.35234
Mother Machine	untreated	1.37379	1.62654	1.83389	1.43927	1.63658	1.36374
Mother Machine	untreated	1.70414	1.41621	1.96032	1.8296	1.89496	1.22539
Mother Machine	untreated	1.44263	1.7947	1.89496	2.41514	2.15505	1.08228
Mother Machine	untreated	1.76782	1.23054	2.15505	1.50496	1.83	1.16836
Mother Machine	untreated	1.5066	1.94755	2.15505	2.15232	2.15369	1.30047
Mother Machine	untreated	1.57625	1.48823	1.83	1.84093	1.83547	1.22902
Mother Machine	untreated	1.63332	1.41109	1.89411	1.78713	1.84062	1.20378
Mother Machine	untreated	1.63215	1.56846	1.89411	2.15151	2.02281	1.1778
Mother Machine	untreated	1.63753	1.73717	2.09065	1.95581	2.02323	1.35147
Mother Machine	untreated	1.43833	1.61558	2.09065	0.935355	1.513	1.54091
Mother Machine	untreated	1.57673	1.56125	1.513	2.02061	1.7668	1.37118
Mother Machine	untreated	1.51159	1.66785	1.7668	2.03183	1.89932	1.28013
Mother Machine	untreated	1.44846	1.42846	1.7042	1.56808	1.63614	1.24077
Mother Machine	untreated	1.51042	1.48984	1.7042	1.70328	1.70374	1.29651
Mother Machine	untreated	1.70401	1.54051	1.97029	2.34586	2.15807	1.08645
Mother Machine	untreated	1.37661	1.43018	1.97029	1.6975	1.83389	0.972889
Mother Machine	untreated	1.57189	1.48788	1.63614	2.41563	2.02589	1.03389
Mother Machine	untreated	1.70995	1.6027	2.15807	1.76256	1.96032	1.35234
Mother Machine	untreated	1.37379	1.62654	1.83389	1.43927	1.63658	1.36374
Mother Machine	untreated	1.70414	1.41621	1.96032	1.8296	1.89496	1.22539
Mother Machine	untreated	1.44263	1.7947	1.89496	2.41514	2.15505	1.08228
Mother Machine	untreated	1.76782	1.23054	2.15505	1.50496	1.83	1.16836
Mother Machine	untreated	1.5066	1.94755	2.15505	2.15232	2.15369	1.30047
Mother Machine	untreated	1.57625	1.48823	1.83	1.84093	1.83547	1.22902
Mother Machine	untreated	1.63332	1.41109	1.89411	1.78713	1.84062	1.20378
Mother Machine	untreated	1.63215	1.56846	1.89411	2.15151	2.02281	1.1778
Mother Machine	untreated	1.63753	1.73717	2.09065	1.95581	2.02323	1.35147
Mother Machine	untreated	1.43833	1.61558	2.09065	0.935355	1.513	1.54091
Mother Machine	untreated	1.57673	1.56125	1.513	2.02061	1.7668	1.37118
Mother Machine	untreated	1.51159	1.66785	1.7668	2.03183	1.89932	1.28013
Mother Machine	untreated	1.44819	1.54785	1.50506	2.16448	1.83477	1.16127
Mother Machine	untreated	1.69968	1.303	1.89502	1.89216	1.89359	1.10909
Mother Machine	untreated	1.44501	1.4078	1.89502	1.50465	1.69983	1.15297
Mother Machine	untreated	1.63788	1.29496	1.63684	1.89071	1.76377	1.16906
Mother Machine	untreated	1.44195	1.47908	1.89359	1.37721	1.6354	1.28563
Mother Machine	untreated	1.31151	1.73952	1.76377	2.0279	1.89584	1.15518
Mother Machine	untreated	1.37449	1.66924	1.76601	1.63353	1.69977	1.34396
Mother Machine	untreated	1.44336	1.22309	1.76601	1.50689	1.63645	1.02999
Mother Machine	untreated	1.43983	1.42686	1.63624	1.89134	1.76379	1.10291
Mother Machine	untreated	1.37533	1.61232	1.63624	1.89454	1.76539	1.22227
Mother Machine	untreated	1.24558	1.6308	1.63645	1.76664	1.70155	1.17483
Mother Machine	untreated	1.5092	1.54987	1.69977	1.83226	1.76601	1.29305
Mother Machine	untreated	1.51031	1.23388	1.69977	1.44992	1.57485	1.16935
Mother Machine	untreated	1.50789	1.60644	1.76539	2.16657	1.96598	1.14835
Mother Machine	untreated	1.44793	1.42821	1.57485	1.5774	1.57612	1.30002
Mother Machine	untreated	1.37775	1.68267	1.57485	1.96068	1.76776	1.29265
Mother Machine	untreated	1.50671	1.41779	1.76601	1.29305	1.52953	1.39497
Mother Machine	untreated	1.57511	1.17122	1.76601	1.36648	1.56625	1.18008
Mother Machine	untreated	1.44159	1.67126	1.70155	1.9621	1.83182	1.28103
Mother Machine	untreated	1.44084	1.4229	1.57612	1.56667	1.5714	1.29235
Mother Machine	untreated	1.30976	1.30284	1.57612	1.04443	1.31028	1.30232
Mother Machine	untreated	1.30743	1.80886	1.56625	1.97486	1.77055	1.34574
Mother Machine	untreated	1.56772	1.37518	1.76776	1.76529	1.76653	1.17637
Mother Machine	untreated	1.3749	1.42273	1.76776	0.982041	1.3749	1.42273
Mother Machine	untreated	1.50988	1.42348	1.5714	1.4312	1.5013	1.43207
Mother Machine	untreated	1.31528	1.42675	1.31028	1.96261	1.63644	1.10558
Mother Machine	untreated	1.37515	1.55809	1.5013	1.63873	1.57002	1.36323
Mother Machine	untreated	1.31527	1.56087	1.6945	1.70152	1.69801	1.17813
Mother Machine	untreated	1.44316	1.61554	1.6945	1.95794	1.82622	1.23248
Mother Machine	untreated	1.24283	1.37326	1.50933	1.76972	1.63953	0.976565
Mother Machine	untreated	1.37449	1.66924	1.76601	1.63353	1.69977	1.34396
Mother Machine	untreated	1.44336	1.22309	1.76601	1.50689	1.63645	1.02999
Mother Machine	untreated	1.43983	1.42686	1.63624	1.89134	1.76379	1.10291
Mother Machine	untreated	1.37533	1.61232	1.63624	1.89454	1.76539	1.22227
Mother Machine	untreated	1.24558	1.6308	1.63645	1.76664	1.70155	1.17483
Mother Machine	untreated	1.5092	1.54987	1.69977	1.83226	1.76601	1.29305
Mother Machine	untreated	1.51031	1.23388	1.69977	1.44992	1.57485	1.16935
Mother Machine	untreated	1.50789	1.60644	1.76539	2.16657	1.96598	1.14835
Mother Machine	untreated	1.44793	1.42821	1.57485	1.5774	1.57612	1.30002
Mother Machine	untreated	1.37775	1.68267	1.57485	1.96068	1.76776	1.29265
Mother Machine	untreated	1.50671	1.41779	1.76601	1.29305	1.52953	1.39497
Mother Machine	untreated	1.57511	1.17122	1.76601	1.36648	1.56625	1.18008
Mother Machine	untreated	1.44159	1.67126	1.70155	1.9621	1.83182	1.28103
Mother Machine	untreated	1.44084	1.4229	1.57612	1.56667	1.5714	1.29235
Mother Machine	untreated	1.30976	1.30284	1.57612	1.04443	1.31028	1.30232
Mother Machine	untreated	1.30743	1.80886	1.56625	1.97486	1.77055	1.34574
Mother Machine	untreated	1.56772	1.37518	1.76776	1.76529	1.76653	1.17637
Mother Machine	untreated	1.3749	1.42273	1.76776	0.982041	1.3749	1.42273
Mother Machine	untreated	1.50988	1.42348	1.5714	1.4312	1.5013	1.43207
Mother Machine	untreated	1.31528	1.42675	1.31028	1.96261	1.63644	1.10558
Mother Machine	untreated	1.37515	1.55809	1.5013	1.63873	1.57002	1.36323
Mother Machine	untreated	1.31527	1.56087	1.6945	1.70152	1.69801	1.17813
Mother Machine	untreated	1.44316	1.61554	1.6945	1.95794	1.82622	1.23248
Mother Machine	untreated	1.24283	1.37326	1.50933	1.76972	1.63953	0.976565
Mother Machine	untreated	1.38649	1.22149	1.50679	1.36699	1.43689	1.17109
Mother Machine	untreated	1.11566	1.43036	1.50679	1.51937	1.51308	1.03294
Mother Machine	untreated	1.37538	1.66345	1.76932	1.7569	1.76311	1.27572
Mother Machine	untreated	1.11761	1.63364	1.51308	1.50109	1.50709	1.24416
Mother Machine	untreated	1.18242	1.54474	1.43841	1.70988	1.57415	1.15301
Mother Machine	untreated	1.63232	1.61478	1.89431	1.76558	1.82995	1.41716
Mother Machine	untreated	1.56637	1.81129	2.02354	1.63918	1.83136	1.5463
Mother Machine	untreated	1.64403	1.48624	2.02354	2.0417	2.03262	1.09764
Mother Machine	untreated	1.50795	1.36512	2.03262	1.3626	1.69761	1.17546
Mother Machine	untreated	1.64106	1.65808	2.03262	2.14002	2.08632	1.21282
Mother Machine	untreated	1.50136	1.75276	1.83136	1.6958	1.76358	1.49055
Mother Machine	untreated	1.44089	1.81841	1.69761	1.8327	1.76515	1.49414
Mother Machine	untreated	1.38196	1.55546	1.69761	1.31346	1.50554	1.43188
Mother Machine	untreated	1.70025	1.62138	2.08632	1.98584	2.03608	1.28556
Mother Machine	untreated	1.57533	1.40886	2.08632	1.58082	1.83357	1.15062
Mother Machine	untreated	1.44541	1.69454	1.50554	2.28635	1.89595	1.24401
Mother Machine	untreated	1.37806	1.55568	1.50554	2.15144	1.82849	1.10525
Mother Machine	untreated	1.63275	1.49119	2.03608	1.62845	1.83227	1.29168
Mother Machine	untreated	1.70352	1.66063	2.03608	2.13828	2.08718	1.27698
Mother Machine	untreated	1.44174	1.49435	1.89595	1.63025	1.7631	1.17299
Mother Machine	untreated	1.44391	1.62313	1.82849	1.83354	1.83101	1.23603
Mother Machine	untreated	1.57104	1.48444	1.83227	1.70814	1.7702	1.28528
Mother Machine	untreated	1.76504	1.34789	2.08718	1.69526	1.89122	1.22171
Mother Machine	untreated	1.50024	1.69033	1.83101	1.57739	1.7042	1.48637
Mother Machine	untreated	1.57406	1.3686	1.83101	1.69881	1.76491	1.17774
Mother Machine	untreated	1.37294	1.4977	1.76491	1.64125	1.70308	1.16756
Mother Machine	untreated	1.44257	1.99301	1.70308	1.96404	1.83356	1.60202
Mother Machine	untreated	1.37201	2.2781	1.70239	2.3672	2.0348	1.61531
Mother Machine	untreated	1.51697	1.41278	1.76501	1.76761	1.76631	1.16344
Mother Machine	untreated	1.4443	1.65648	1.76631	2.02274	1.89452	1.20626
Mother Machine	untreated	1.31833	1.67357	1.63719	1.63943	1.63831	1.35359
Mother Machine	untreated	1.70094	1.4818	1.76369	2.28555	2.02462	1.15812
Mother Machine	untreated	1.56683	1.81292	1.76369	1.91154	1.83761	1.54214
Mother Machine	untreated	1.50576	1.62718	1.89722	1.77426	1.83574	1.2972
Mother Machine	untreated	1.57327	1.35809	1.89722	2.02371	1.96047	0.970895
Mother Machine	untreated	1.6347	1.99407	2.02462	1.89717	1.96089	1.66787
Mother Machine	untreated	1.44715	1.7575	1.96047	1.69949	1.82998	1.37467
Mother Machine	untreated	1.31365	1.35743	1.8299	1.18143	1.50566	1.16542
Mother Machine	untreated	1.44746	1.59809	1.89569	1.76918	1.83244	1.21311
Mother Machine	untreated	1.57235	1.48359	1.89569	1.77921	1.83745	1.21848
Mother Machine	untreated	1.50808	1.43101	1.83745	2.08921	1.96333	0.975764
Mother Machine	untreated	1.37395	1.78862	1.83745	1.94603	1.89174	1.27083
Mother Machine	untreated	1.31679	1.60946	1.50566	1.63999	1.57283	1.35342
Mother Machine	untreated	1.50403	1.43171	1.89174	1.11844	1.50509	1.43065
Mother Machine	untreated	1.44307	1.29165	1.89174	1.2588	1.57527	1.15945
Mother Machine	untreated	1.383	1.36549	1.57527	1.83419	1.70473	1.04376
Mother Machine	untreated	1.3822	1.48546	1.57527	1.70353	1.6394	1.22826
Mother Machine	untreated	1.30805	1.94491	1.50509	2.28494	1.89502	1.35795
Mother Machine	untreated	1.38282	1.6778	1.6394	2.01802	1.82871	1.23191
Mother Machine	untreated	1.44191	1.55426	1.70473	1.96734	1.83603	1.16014
Mother Machine	untreated	1.44366	1.29745	1.70473	1.69495	1.69984	1.04127
Mother Machine	untreated	1.38551	1.99507	1.83603	1.81616	1.82609	1.55448
Mother Machine	untreated	1.57148	1.69622	1.83603	2.21184	2.02394	1.24377
Mother Machine	untreated	1.76717	1.4651	2.02394	2.15445	2.08919	1.14308
Mother Machine	untreated	1.25596	1.86981	1.82609	1.9571	1.8916	1.23417
Mother Machine	untreated	1.50748	1.60869	2.08919	1.57703	1.83311	1.28305
Mother Machine	untreated	1.44745	1.7436	1.63183	2.04208	1.83695	1.3541
Mother Machine	untreated	1.57385	1.43082	1.83695	1.56656	1.70176	1.30292
Mother Machine	untreated	1.5707	1.2364	1.89505	1.50986	1.70246	1.10464
Mother Machine	untreated	1.51106	1.54977	1.77096	1.77265	1.7718	1.28903
Mother Machine	untreated	1.37554	1.6316	1.7718	1.49441	1.63311	1.37403
Mother Machine	untreated	1.44389	1.47952	1.63311	2.019	1.82605	1.09736
Mother Machine	untreated	1.37508	1.55577	1.70488	1.56632	1.6356	1.29525
Mother Machine	untreated	1.30897	1.43331	1.70488	1.57599	1.64043	1.10185
Mother Machine	untreated	1.38057	1.48638	1.57105	1.96892	1.76999	1.09695
Mother Machine	untreated	1.44415	1.54142	1.64043	2.01829	1.82936	1.15621
Mother Machine	untreated	1.18361	1.69447	1.64043	1.62658	1.63351	1.24458
Mother Machine	untreated	1.37151	1.62282	1.6356	1.50938	1.57249	1.42185
Mother Machine	untreated	1.56887	1.81267	1.63351	2.29944	1.96647	1.41507
Mother Machine	untreated	1.25103	1.56659	1.63351	1.76929	1.7014	1.11622
Mother Machine	untreated	1.44677	1.54412	1.7014	1.70676	1.70408	1.28681
Mother Machine	untreated	1.37379	1.67686	1.7014	1.81394	1.75767	1.29298
Mother Machine	untreated	1.57313	1.74868	1.70408	2.08795	1.89602	1.42579
Mother Machine	untreated	1.44328	1.28016	1.75767	1.52119	1.63943	1.08401
Mother Machine	untreated	1.24519	1.41437	1.63943	1.49563	1.56753	1.09203
Mother Machine	untreated	1.44707	1.7117	1.63943	1.89399	1.76671	1.39206
Mother Machine	untreated	1.70253	1.09112	1.89602	1.64085	1.76843	1.02522
Mother Machine	untreated	1.70004	1.2124	1.89602	1.772	1.83401	1.07843
Mother Machine	untreated	1.37315	1.29148	1.83401	1.70463	1.76932	0.895314
Mother Machine	untreated	1.44747	1.73183	1.76843	1.76783	1.76813	1.41117
Mother Machine	untreated	1.45255	1.41464	1.76843	1.63078	1.6996	1.16758
Mother Machine	untreated	1.31894	1.59	1.56753	1.84521	1.70637	1.20257
Mother Machine	untreated	1.37572	1.68576	1.76932	2.2546	2.01196	1.04953
Mother Machine	untreated	1.37513	1.99144	1.6996	1.57057	1.63509	1.73148
Mother Machine	untreated	1.43943	1.2962	1.64025	1.52409	1.58217	1.15346
Mother Machine	untreated	1.24578	1.62435	1.56772	1.83247	1.70009	1.17003
Mother Machine	untreated	1.44705	1.66959	1.50494	2.55287	2.02891	1.08773
Mother Machine	untreated	1.31142	1.43588	1.50494	1.63986	1.5724	1.1749
Mother Machine	untreated	1.37118	1.36238	1.70009	1.5725	1.6363	1.09726
Mother Machine	untreated	1.50975	1.67884	1.70009	2.21401	1.95705	1.23153
Mother Machine	untreated	1.30827	1.35791	1.5724	1.69375	1.63308	1.0331
Mother Machine	untreated	1.30963	1.41754	1.5724	1.95879	1.76559	0.961581
Mother Machine	untreated	1.44007	1.87039	1.6363	2.02838	1.83234	1.47812
Mother Machine	untreated	1.31699	1.69118	1.63308	1.63816	1.63562	1.37255
Mother Machine	untreated	1.5064	1.48931	1.77057	1.76313	1.76685	1.22886
Mother Machine	untreated	1.38446	1.54386	1.77057	1.7658	1.76819	1.16013
Mother Machine	untreated	1.31286	1.62443	1.76819	1.89701	1.8326	1.1047
Mother Machine	untreated	1.37355	1.95225	1.50707	2.42389	1.96548	1.36032
Mother Machine	untreated	1.31783	1.23072	1.63889	1.37963	1.50926	1.03929
Mother Machine	untreated	1.30905	1.49644	1.63781	1.89177	1.76479	1.04069
Mother Machine	untreated	1.31097	1.30335	1.50926	1.63168	1.57047	1.04385
Mother Machine	untreated	1.3135	1.54796	1.50926	1.51426	1.51176	1.3497
Mother Machine	untreated	1.3771	1.16564	1.57047	1.69594	1.6332	0.909536
Mother Machine	untreated	1.18343	1.36688	1.57047	1.17758	1.37403	1.17628
Mother Machine	untreated	1.57252	1.28055	1.51176	2.28434	1.89805	0.955024
Mother Machine	untreated	1.45294	1.60589	1.89805	1.91067	1.90436	1.15446
Mother Machine	untreated	1.38306	1.6172	1.6332	1.89115	1.76218	1.23808
Mother Machine	untreated	1.24896	1.56352	1.69391	1.71031	1.70211	1.11037
Mother Machine	untreated	1.57375	1.28459	1.69391	1.82669	1.7603	1.09804
Mother Machine	untreated	1.44182	1.42673	1.50848	1.75896	1.63372	1.23483
Mother Machine	untreated	1.31582	1.29316	1.50734	1.77223	1.63979	0.969197
Mother Machine	untreated	1.25093	1.28991	1.50734	1.23792	1.37263	1.16821
Mother Machine	untreated	1.31447	1.34705	1.7603	1.51266	1.63648	1.02504
Mother Machine	untreated	1.37691	1.35013	1.70211	1.70728	1.7047	1.02234
Mother Machine	untreated	1.2435	1.92564	1.37263	2.80093	2.08678	1.08236
Mother Machine	untreated	1.31408	1.67844	1.63648	2.14668	1.89158	1.10094
Mother Machine	untreated	1.44565	1.26979	1.7047	1.82858	1.76664	0.948809
Mother Machine	untreated	1.37966	1.55029	1.76664	2.1594	1.96302	0.966927
Mother Machine	untreated	1.50464	1.3679	1.70005	1.97442	1.83723	1.0353
Mother Machine	untreated	1.32129	1.26586	1.70005	1.32635	1.5132	1.07395
Mother Machine	untreated	1.37839	1.54535	1.83723	1.44258	1.63991	1.28383
Mother Machine	untreated	1.24869	1.4105	1.5132	1.62699	1.5701	1.08909
Mother Machine	untreated	1.11852	1.62665	1.5132	1.76371	1.63846	1.10671
Mother Machine	untreated	1.24709	1.55925	1.63846	1.75699	1.69772	1.10862
Mother Machine	untreated	1.31048	1.41169	1.69772	1.31904	1.50838	1.21378
Mother Machine	untreated	1.05434	1.23487	1.31615	1.31009	1.31312	0.9761
Mother Machine	untreated	1.19137	1.61979	1.5689	1.69817	1.63354	1.17763
Mother Machine	untreated	1.17966	1.49345	1.57555	2.09291	1.83423	0.838881
Mother Machine	untreated	1.24563	1.3609	1.57051	1.05544	1.31297	1.29355
Mother Machine	untreated	1.3836	1.36219	1.57051	1.57033	1.57042	1.17537
Mother Machine	untreated	1.18068	1.30106	1.4474	1.29664	1.37202	1.10973
Mother Machine	untreated	1.25214	1.42524	1.4474	1.57089	1.50914	1.16823
Mother Machine	untreated	1.37636	1.55936	1.24659	1.89184	1.56922	1.36651
Mother Machine	untreated	1.18207	1.16947	1.24659	1.37733	1.31196	1.03959
Mother Machine	untreated	1.24835	1.35992	1.31297	1.44224	1.37761	1.23066
Mother Machine	untreated	1.31185	1.60491	1.31297	2.09784	1.70541	1.21135
Mother Machine	untreated	1.05623	1.67185	1.31196	1.69337	1.50266	1.22541
Mother Machine	untreated	1.31355	1.02211	1.50914	1.50368	1.50641	0.829242
Mother Machine	untreated	1.31386	1.16995	1.37202	1.64908	1.51055	0.973266
Mother Machine	untreated	1.11349	1.3572	1.37202	1.13699	1.2545	1.21619
Mother Machine	untreated	1.31009	1.3661	1.37761	2.28484	1.83122	0.844967
Mother Machine	untreated	1.17967	1.29874	1.50641	1.24668	1.37654	1.10186
Mother Machine	untreated	1.1787	1.55081	1.50641	1.77589	1.64115	1.08837
Mother Machine	untreated	1.2483	1.73341	1.51055	1.62159	1.56607	1.41565
Mother Machine	untreated	1.18033	1.4265	1.2545	2.03241	1.64345	0.963378
Mother Machine	untreated	1.24842	1.48326	1.37654	1.37611	1.37633	1.35536
Mother Machine	untreated	1.1817	1.60104	1.37654	1.75909	1.56782	1.21493
Mother Machine	untreated	1.50089	1.4926	1.64345	1.897	1.77023	1.22325
Mother Machine	untreated	1.18733	2.12077	1.64345	1.87293	1.75819	1.54991
Mother Machine	untreated	1.44245	1.6209	1.77023	1.50308	1.63665	1.4267
Mother Machine	untreated	1.44538	1.60903	1.77023	1.50751	1.63887	1.41553
Mother Machine	untreated	1.37576	1.41929	1.63887	1.76475	1.70181	1.09324
Mother Machine	untreated	1.37382	1.31221	1.57123	1.56871	1.56997	1.11607
Mother Machine	untreated	1.32072	1.02934	1.57123	1.44551	1.50837	0.841687
Mother Machine	untreated	1.31395	1.49046	1.76311	1.64218	1.70264	1.10177
Mother Machine	untreated	1.31586	1.66561	2.09031	1.95587	2.02309	0.958373
Mother Machine	untreated	1.18334	1.40278	1.50423	1.76947	1.63685	0.949271
Mother Machine	untreated	1.3078	1.68788	2.02309	1.91727	1.97018	1.0255
Mother Machine	untreated	1.57321	1.4817	1.97018	1.82649	1.89833	1.15658
Mother Machine	untreated	1.51267	1.3667	1.97018	1.56121	1.76569	1.11367
Mother Machine	untreated	1.6996	1.54194	1.76569	2.17011	1.9679	1.27364
Mother Machine	untreated	1.25468	1.66343	1.76569	1.2562	1.51095	1.40716
Mother Machine	untreated	1.44357	1.4846	1.51095	2.28105	1.896	1.03217
Mother Machine	untreated	1.18334	1.40278	1.50423	1.76947	1.63685	0.949271
Mother Machine	untreated	1.63763	1.60012	1.96016	1.9704	1.96528	1.27248
Mother Machine	untreated	1.44108	1.61642	1.96016	1.706	1.83308	1.22442
Mother Machine	untreated	1.57107	1.60706	1.83308	2.09421	1.96364	1.21449
Mother Machine	untreated	1.43929	1.54151	1.96364	1.83877	1.90121	1.0796
Mother Machine	untreated	1.24725	2.11931	1.90121	1.77066	1.83593	1.53063
Mother Machine	untreated	1.31229	1.6806	1.63706	1.50072	1.56889	1.424
Mother Machine	untreated	1.57304	1.53911	1.95789	1.82295	1.89042	1.22173
Mother Machine	untreated	1.56833	1.10064	1.89042	1.88929	1.88986	0.779115
Mother Machine	untreated	1.5084	1.40376	1.89042	1.51593	1.70318	1.20898
Mother Machine	untreated	1.44569	1.35811	1.88986	1.8933	1.89158	0.91223
Mother Machine	untreated	1.1811	1.54868	1.88986	1.11953	1.50469	1.22509
Mother Machine	untreated	1.44392	1.66953	1.70318	2.08663	1.8949	1.21855
Mother Machine	untreated	1.31345	1.67578	1.6326	1.77707	1.70483	1.2844
Mother Machine	untreated	1.38491	1.22772	1.6326	1.25897	1.44578	1.16685
Mother Machine	untreated	1.17836	1.43135	1.44578	1.69233	1.56906	1.04065
Mother Machine	untreated	1.30993	1.55283	1.77131	1.50508	1.63819	1.22457
Mother Machine	untreated	1.1232	1.35997	1.50252	0.992839	1.24768	1.23549
Mother Machine	untreated	1.30848	1.362	1.50252	2.03126	1.76689	0.903584
Mother Machine	untreated	1.25419	1.33792	1.37602	1.63657	1.50629	1.08581
Mother Machine	untreated	1.11836	1.67627	1.24768	1.90241	1.57504	1.21958
Mother Machine	untreated	1.37564	1.16745	1.83135	1.31885	1.5751	0.967996
Mother Machine	untreated	1.38551	1.2303	1.5751	1.83528	1.70519	0.910627
Mother Machine	untreated	1.24728	1.49642	1.70519	0.911982	1.30859	1.43512
Mother Machine	untreated	1.37544	1.62457	1.33007	2.20353	1.7668	1.23321
Mother Machine	untreated	1.44301	1.30246	1.33007	2.33726	1.83366	0.911809
Mother Machine	untreated	1.308	2.05916	1.89838	2.29634	2.09736	1.2698
Mother Machine	untreated	1.63976	1.56079	1.63651	2.15435	1.89543	1.30512
Mother Machine	untreated	1.38134	1.76443	1.70441	1.96139	1.8329	1.31286
Mother Machine	untreated	1.4409	1.36501	1.70974	1.94362	1.82668	0.979231
Mother Machine	untreated	1.37467	1.80735	1.63812	2.14428	1.8912	1.29082
Mother Machine	untreated	1.31463	1.54462	1.63812	1.51202	1.57507	1.28418
Mother Machine	untreated	1.50543	1.16786	1.8329	2.09311	1.963	0.710283
Mother Machine	untreated	1.57519	1.29249	1.82668	2.23719	2.03194	0.835751
Mother Machine	untreated	1.3824	1.41426	1.57507	1.96874	1.7719	1.02476
Mother Machine	untreated	1.57079	1.61758	1.57507	2.20554	1.8903	1.29807
Mother Machine	untreated	1.63793	1.16902	1.8912	1.77206	1.83163	0.975325
Mother Machine	untreated	1.44214	1.61968	1.8912	1.90524	1.89822	1.16359
Mother Machine	untreated	1.50465	1.49374	1.8903	1.3738	1.63205	1.36634
Mother Machine	untreated	1.44466	1.48428	1.7719	1.88821	1.83006	1.09889
Mother Machine	untreated	1.44881	1.66389	1.83163	1.82881	1.83022	1.28248
Mother Machine	untreated	1.38225	1.74547	1.83163	1.82838	1.83	1.29772
Mother Machine	untreated	1.44515	1.41487	1.89822	1.50679	1.7025	1.15751
Mother Machine	untreated	1.63859	1.33108	1.83	1.58207	1.70604	1.26363
Mother Machine	untreated	1.70534	1.54976	1.8949	2.28387	2.08938	1.16572
Mother Machine	untreated	1.50634	1.43319	1.83349	1.70358	1.76853	1.171
Mother Machine	untreated	1.50618	1.89116	1.9601	2.22274	2.09142	1.30592
Mother Machine	untreated	1.37536	1.43359	1.9601	1.45716	1.70863	1.10031
Mother Machine	untreated	1.44444	1.46291	1.83226	1.44732	1.63979	1.26756
Mother Machine	untreated	1.57395	1.35908	1.83226	1.4372	1.63473	1.2983
Mother Machine	untreated	1.63405	1.60324	1.95816	1.96261	1.96038	1.27691
Mother Machine	untreated	1.50839	1.21222	1.70863	1.68352	1.69608	1.02454
Mother Machine	untreated	1.37325	1.37401	1.63473	1.37677	1.50575	1.2415
Mother Machine	untreated	1.7649	1.65983	2.2817	1.63162	1.95666	1.46807
Mother Machine	untreated	1.69871	1.4903	1.95666	1.359	1.65783	1.53118
Mother Machine	untreated	1.57071	1.66923	1.65783	2.26998	1.96391	1.27603
Mother Machine	untreated	1.63817	1.86887	1.96391	2.21585	2.08988	1.41716
Mother Machine	untreated	1.63349	1.67356	2.08988	1.58586	1.83787	1.46918
Mother Machine	untreated	1.57259	1.54829	1.83787	1.83302	1.83545	1.28543
Mother Machine	untreated	1.57597	1.61952	1.83545	2.07842	1.95693	1.23856
Mother Machine	untreated	1.63991	1.47874	1.95693	1.96655	1.96174	1.1569
Mother Machine	untreated	1.5068	1.67516	1.96174	1.70359	1.83266	1.34929
Mother Machine	untreated	1.76592	1.49041	1.96425	2.20386	2.08405	1.17228
Mother Machine	untreated	1.76306	1.4884	2.08405	2.1094	2.09673	1.15473
Mother Machine	untreated	1.5082	1.36119	2.08405	1.05427	1.56916	1.30023
Mother Machine	untreated	1.63984	1.73696	2.09673	2.2107	2.15371	1.22309
Mother Machine	untreated	1.51044	1.67881	1.56916	2.35746	1.96331	1.22594
Mother Machine	untreated	1.57619	2.19164	1.96331	2.48145	2.22238	1.54545
Mother Machine	untreated	1.50447	1.8029	1.96331	2.07869	2.021	1.28638
Mother Machine	untreated	1.43714	1.44069	1.7016	1.43366	1.56763	1.31019
Mother Machine	untreated	1.37327	1.55315	1.7016	1.57161	1.63661	1.28981
Mother Machine	untreated	1.64125	1.4907	1.9625	1.95885	1.96067	1.17127
Mother Machine	untreated	1.37255	1.54008	1.83107	1.70296	1.76702	1.1456
Mother Machine	untreated	1.37766	1.36718	1.57412	1.71457	1.64435	1.1005
Mother Machine	untreated	1.37324	1.63634	1.96067	1.17812	1.56939	1.44018
Mother Machine	untreated	1.44572	1.60661	1.64435	2.02309	1.83372	1.21862
Mother Machine	untreated	1.38522	2.23738	1.64435	2.66257	2.15346	1.46914
Mother Machine	untreated	1.4389	1.41883	1.83372	1.42717	1.63045	1.22729
Mother Machine	untreated	1.44051	1.61827	1.63262	1.6422	1.63741	1.42137
Mother Machine	untreated	1.57279	1.35488	1.63262	1.9006	1.76661	1.16106
Mother Machine	untreated	1.57068	1.69533	1.96297	2.08582	2.02439	1.24161
Mother Machine	untreated	1.5707	1.75005	1.76661	2.14493	1.95577	1.36498
Mother Machine	untreated	1.63053	1.31886	2.02439	1.64931	1.83685	1.11254
Mother Machine	untreated	1.44261	1.34481	1.83685	1.57098	1.70392	1.08351
Mother Machine	untreated	1.43842	1.6277	1.50277	1.76267	1.63272	1.4334
Mother Machine	untreated	1.44182	1.68204	1.50277	2.15844	1.83061	1.29325
Mother Machine	untreated	1.37323	1.43736	1.63773	1.50965	1.57369	1.2369
Mother Machine	untreated	1.50464	1.42495	1.63393	1.50794	1.57094	1.35866
Mother Machine	untreated	1.50421	1.88692	1.63272	2.67695	2.15484	1.23629
Mother Machine	untreated	1.50712	1.42468	1.70052	1.83953	1.77003	1.16177
Mother Machine	untreated	1.43755	1.37502	1.70052	1.7051	1.70281	1.10976
Mother Machine	untreated	1.50897	1.62876	1.82527	1.82115	1.82321	1.31452
Mother Machine	untreated	1.37796	1.40395	1.70281	1.96674	1.83478	0.94713
Mother Machine	untreated	1.37736	1.16206	1.77003	1.37696	1.57349	0.965929
Mother Machine	untreated	1.51374	1.73099	1.77003	1.37505	1.57254	1.67219
Mother Machine	untreated	1.3781	1.81642	1.82321	1.72409	1.77365	1.42087
Mother Machine	untreated	1.18792	1.35892	1.57349	1.31177	1.44263	1.10421
Mother Machine	untreated	1.64227	1.48366	1.57254	1.71199	1.64227	1.48366
Mother Machine	untreated	1.57409	1.44255	1.64227	1.76074	1.7015	1.31514
Mother Machine	untreated	1.30646	2.07056	1.44263	2.35653	1.89958	1.47744
Mother Machine	untreated	1.18361	1.28193	1.44263	1.30362	1.37313	1.09241
Mother Machine	untreated	1.44059	1.28509	1.7015	1.7114	1.70645	1.01922
Mother Machine	untreated	1.18815	1.41722	1.37313	1.39202	1.38257	1.2228
Mother Machine	untreated	1.2492	1.26744	1.37313	1.63274	1.50293	1.01371
Mother Machine	untreated	1.6358	1.50241	1.89958	1.88949	1.89454	1.24367
Mother Machine	untreated	1.31552	1.28307	1.50293	1.77718	1.64006	0.958536
Mother Machine	untreated	1.11636	1.68724	1.50293	1.65509	1.57901	1.22459
Mother Machine	untreated	1.24652	1.61545	1.38257	1.61929	1.50093	1.36104
Mother Machine	untreated	1.31603	1.80589	1.64006	2.02298	1.83152	1.29039
Mother Machine	untreated	1.25031	1.35659	1.64006	1.37359	1.50682	1.10008
Mother Machine	untreated	1.44134	1.2959	1.57901	1.56206	1.57054	1.16671
Mother Machine	untreated	1.37642	1.03762	1.57901	1.69481	1.63691	0.777125
Mother Machine	untreated	1.17813	1.68975	1.50682	1.3763	1.44156	1.42632
Mother Machine	untreated	1.24658	1.66543	1.63691	1.88973	1.76332	1.14868
Mother Machine	untreated	1.18166	1.5621	1.63691	1.90503	1.77097	0.972794
Mother Machine	untreated	1.44314	1.80242	1.76332	2.15537	1.95935	1.28621
Mother Machine	untreated	1.5009	1.80529	1.95935	1.84106	1.9002	1.40599
Mother Machine	untreated	1.51103	1.42305	1.69707	2.07801	1.88754	1.04655
Mother Machine	untreated	1.44731	1.61265	1.69707	1.44926	1.57316	1.48679
Mother Machine	untreated	1.76275	1.48584	1.82925	2.34278	2.08602	1.16258
Mother Machine	untreated	1.44592	1.47226	1.43809	1.95955	1.69882	1.21936
Mother Machine	untreated	1.5082	1.49502	1.57316	1.82611	1.69964	1.30358
Mother Machine	untreated	1.51159	0.914087	1.57316	1.82243	1.6978	0.727883
Mother Machine	untreated	1.44192	1.62027	1.69678	1.70824	1.70251	1.35967
Mother Machine	untreated	1.5713	1.37798	1.63688	2.28765	1.96226	0.987015
Mother Machine	untreated	1.43832	1.35491	1.96226	1.44559	1.70393	1.0893
Mother Machine	untreated	1.7649	1.60843	2.08131	2.09503	2.08817	1.28516
Mother Machine	untreated	1.6375	1.23514	2.08817	1.31389	1.70103	1.17161
Mother Machine	untreated	1.4469	1.59845	1.70103	1.83382	1.76742	1.27793
Mother Machine	untreated	1.38012	2.01282	1.70291	2.22027	1.96159	1.43135
Mother Machine	untreated	1.57888	1.47071	1.83383	2.22373	2.02878	1.02081
Mother Machine	untreated	1.63772	1.36342	1.76799	1.77935	1.77367	1.22746
Mother Machine	untreated	1.50363	1.75098	1.76799	1.63415	1.70107	1.55354
Mother Machine	untreated	1.51829	1.35547	1.77367	1.4958	1.63473	1.23902
Mother Machine	untreated	1.51048	1.29522	1.77367	1.4915	1.63259	1.17311
Mother Machine	untreated	1.63932	1.41895	1.70107	2.08614	1.89361	1.16466
Mother Machine	untreated	1.37586	1.41353	1.63259	1.24423	1.43841	1.35098
Mother Machine	untreated	1.44545	1.43196	1.63259	1.77208	1.70233	1.17507
Mother Machine	untreated	1.57591	1.2099	1.89361	1.25376	1.57368	1.21212
Mother Machine	untreated	1.37308	1.35193	1.43841	2.22135	1.82988	0.895125
Mother Machine	untreated	1.24612	1.42868	1.43841	1.43432	1.43637	1.23843
Mother Machine	untreated	1.44319	1.48397	1.70233	1.16769	1.43501	1.49216
Mother Machine	untreated	1.179	1.43894	1.43637	1.7147	1.57553	1.04241
Mother Machine	untreated	1.31417	1.55031	1.43637	1.70138	1.56887	1.2956
Mother Machine	untreated	1.37937	1.22085	1.43501	1.70778	1.57139	1.02882
Mother Machine	untreated	1.50623	1.50008	1.43501	1.96893	1.70197	1.30434
Mother Machine	untreated	1.1851	1.48318	1.57139	1.31466	1.44302	1.22526
Mother Machine	untreated	1.31404	1.93337	1.44302	1.8338	1.63841	1.60899
Mother Machine	untreated	1.5652	1.74901	1.70515	2.22015	1.96265	1.35156
Mother Machine	untreated	1.5685	1.76095	1.70515	1.82284	1.76399	1.56546
Mother Machine	untreated	1.83699	1.41593	1.76399	2.28496	2.02448	1.22845
Mother Machine	untreated	1.50167	1.75574	1.76299	2.03789	1.90044	1.35697
Mother Machine	untreated	1.5697	1.93881	1.76299	1.6448	1.7039	1.80461
Mother Machine	untreated	1.56837	1.36017	1.90044	1.89392	1.89718	1.03135
Mother Machine	untreated	1.63766	1.737	1.76176	2.41519	2.08848	1.28619
Mother Machine	untreated	1.30566	1.61985	1.76348	1.76397	1.76372	1.16178
Mother Machine	untreated	1.30985	1.73633	1.76348	1.63526	1.69937	1.34681
Mother Machine	untreated	1.44152	1.49887	1.83992	1.56584	1.70288	1.23751
Mother Machine	untreated	1.70488	1.27222	1.83992	1.96005	1.89998	1.07711
Mother Machine	untreated	1.37477	1.61363	1.69937	1.71107	1.70522	1.28319
Mother Machine	untreated	1.5117	1.86833	1.89998	1.89278	1.89638	1.48365
Mother Machine	untreated	1.44158	1.75266	1.89998	1.62271	1.76135	1.43289
Mother Machine	untreated	1.7	1.67129	1.89638	2.15006	2.02322	1.34807
Mother Machine	untreated	1.64107	1.73577	1.89638	2.14768	2.02203	1.3548
Mother Machine	untreated	1.57429	1.28382	1.69805	1.71492	1.70649	1.15162
Mother Machine	untreated	1.57343	1.81376	2.02322	2.30877	2.166	1.22119
Mother Machine	untreated	1.64045	1.66911	2.02203	2.03475	2.02839	1.28117
Mother Machine	untreated	1.57696	1.80248	2.02839	1.75745	1.89292	1.48652
Mother Machine	untreated	1.76842	1.60969	2.02839	2.15628	2.09233	1.28578
Mother Machine	untreated	1.58139	1.67325	2.09233	1.82485	1.95859	1.29605
Mother Machine	untreated	1.56947	1.67203	1.7697	2.14772	1.95871	1.28279
Mother Machine	untreated	1.24532	1.86227	1.7697	1.37155	1.57063	1.53696
Mother Machine	untreated	1.57034	1.81328	1.57063	2.0919	1.83126	1.55236
Mother Machine	untreated	1.43665	1.63326	1.76815	2.15789	1.96302	1.10689
Mother Machine	untreated	1.3118	1.92693	1.43934	2.36047	1.89991	1.33882
Mother Machine	untreated	1.18479	1.3574	1.43934	1.56917	1.50426	1.03794
Mother Machine	untreated	1.44629	1.48343	1.96302	1.31756	1.64029	1.28943
Mother Machine	untreated	1.1158	2.06276	1.50426	1.89537	1.69981	1.47874
Mother Machine	untreated	1.76117	1.23958	1.89991	1.88407	1.89199	1.10876
Mother Machine	untreated	1.50815	1.48437	1.89991	1.49994	1.69992	1.2926
Mother Machine	untreated	1.44519	1.61899	1.63796	1.887	1.76248	1.3017
Mother Machine	untreated	1.5687	1.27563	1.69981	1.70353	1.70167	1.14267
Mother Machine	untreated	1.51027	1.1672	1.69981	1.31984	1.50983	1.16764
Mother Machine	untreated	1.56951	1.81354	1.76248	1.51053	1.6365	1.74655
Mother Machine	untreated	1.57559	1.34653	1.70167	1.82577	1.76372	1.1584
Mother Machine	untreated	1.32018	1.45779	1.50983	1.36445	1.43714	1.34083
Mother Machine	untreated	1.37642	1.55733	1.43714	2.09035	1.76375	1.17
Mother Machine	untreated	1.43754	1.36352	1.76375	1.52718	1.64546	1.15559
Mother Machine	untreated	1.37491	1.60793	1.76375	1.90189	1.83282	1.15002
Mother Machine	untreated	1.44394	1.29964	1.64546	1.62786	1.63666	1.10691
Mother Machine	untreated	1.37357	1.81573	1.64546	2.28386	1.96466	1.22464
Mother Machine	untreated	1.30984	1.37134	1.63666	1.6324	1.63453	1.04665
Mother Machine	untreated	1.44035	1.74939	1.69843	2.09695	1.89769	1.29204
Mother Machine	untreated	1.51258	1.4194	1.56306	1.59503	1.57904	1.35293
Mother Machine	untreated	1.37655	1.61646	1.56306	1.58927	1.57617	1.41685
Mother Machine	untreated	1.37364	1.29638	1.77135	1.23441	1.50288	1.16714
Mother Machine	untreated	1.50533	1.48942	1.77135	1.76815	1.76975	1.225
Mother Machine	untreated	1.31563	1.22315	1.50288	1.5094	1.50614	1.03263
Mother Machine	untreated	1.30967	1.37553	1.50288	1.63801	1.57045	1.11475
Mother Machine	untreated	1.37594	1.03256	1.57617	1.31348	1.44482	0.963679
Mother Machine	untreated	1.31101	1.41746	1.50614	1.50353	1.50483	1.22364
Mother Machine	untreated	1.51368	1.48065	1.83527	1.30456	1.56991	1.42441
Mother Machine	untreated	1.43932	1.47996	1.56991	1.70154	1.63573	1.28355
Mother Machine	untreated	1.3179	1.29957	1.57245	1.58168	1.57706	1.04041
Mother Machine	untreated	1.44531	1.10042	1.57245	1.3052	1.43882	1.10691
Mother Machine	untreated	1.3179	1.29957	1.57245	1.58168	1.57706	1.04041
Mother Machine	untreated	1.44531	1.10042	1.57245	1.3052	1.43882	1.10691
Mother Machine	untreated	1.50506	1.55916	1.57367	2.46809	2.02088	1.04334
Mother Machine	untreated	1.38688	1.55394	1.50537	1.6446	1.57499	1.36583
Mother Machine	untreated	1.69608	1.38004	1.76734	1.62483	1.69608	1.38004
Mother Machine	untreated	1.70649	1.21951	1.76734	1.64564	1.70649	1.21951
Mother Machine	untreated	1.37356	1.36955	1.70649	1.44432	1.57541	1.1677
Mother Machine	untreated	1.37769	1.54434	1.70649	1.69233	1.69941	1.22262
Mother Machine	untreated	1.31226	1.23132	1.44293	1.30362	1.37327	1.1703
Mother Machine	untreated	1.31663	1.60527	1.37327	1.89488	1.63408	1.28782
Mother Machine	untreated	1.56888	1.10811	1.83285	1.82681	1.82983	0.847162
Mother Machine	untreated	1.38191	1.68324	1.63914	1.76972	1.70443	1.36072
Mother Machine	untreated	1.51548	1.61487	1.70443	2.61842	2.16143	0.968925
Mother Machine	untreated	1.43729	2.12378	1.70443	2.21417	1.9593	1.60177
Mother Machine	untreated	1.44039	1.61448	2.16143	1.24064	1.70103	1.35384
Mother Machine	untreated	1.50826	1.41782	1.70103	1.70847	1.70475	1.22133
Mother Machine	untreated	1.56626	1.6345	1.70475	2.21088	1.95782	1.24295
Mother Machine	untreated	1.6386	1.29557	1.95782	1.83769	1.89775	1.03642
Mother Machine	untreated	1.573	1.48978	1.95782	1.57676	1.76729	1.2955
Mother Machine	untreated	1.63739	1.23226	2.09197	1.18282	1.63739	1.23226
Mother Machine	untreated	1.31042	1.55531	1.70104	1.57312	1.63708	1.22865
Mother Machine	untreated	1.38622	1.22765	1.63748	1.2403	1.43889	1.17498
Mother Machine	untreated	1.37564	1.49261	1.63748	2.02623	1.83186	1.03639
Mother Machine	untreated	1.37297	1.36106	1.764	1.36859	1.5663	1.16774
Mother Machine	untreated	1.37515	1.69281	1.76872	2.02728	1.898	1.16995
Mother Machine	untreated	1.2449	1.55672	1.76872	1.24505	1.50689	1.29473
Mother Machine	untreated	1.31654	1.60317	1.43889	1.70737	1.57313	1.34658
Mother Machine	untreated	1.24647	1.81685	1.43889	1.71473	1.57681	1.48651
Mother Machine	untreated	1.25314	1.65697	1.5663	1.4441	1.5052	1.40492
Mother Machine	untreated	1.18489	1.42327	1.50689	1.36495	1.43592	1.17224
Mother Machine	untreated	1.5058	1.63862	1.50689	2.9084	2.20765	0.936774
Mother Machine	untreated	1.50644	1.30676	1.898	1.51158	1.70479	1.10841
Mother Machine	untreated	1.24995	1.68854	1.70479	1.56401	1.6344	1.30408
Mother Machine	untreated	1.37951	1.43417	1.43592	2.09893	1.76743	1.04626
Mother Machine	untreated	1.25442	1.72854	1.43592	1.71184	1.57388	1.40908
Mother Machine	untreated	1.43737	1.68319	1.6344	1.76585	1.70012	1.42043
Mother Machine	untreated	1.37715	1.54613	1.76743	1.50095	1.63419	1.28909
Mother Machine	untreated	1.37476	1.6062	1.57388	1.96899	1.77144	1.20952
Mother Machine	untreated	1.50823	1.23452	1.70012	1.83784	1.76898	0.973774
Mother Machine	untreated	1.37954	1.55794	1.76898	1.50292	1.63595	1.30152
Mother Machine	untreated	1.37857	1.34696	1.76898	1.50299	1.63599	1.08954
Mother Machine	untreated	1.50763	1.36099	1.76754	1.77898	1.77326	1.09536
Mother Machine	untreated	1.56829	1.94791	1.76655	2.41521	2.09088	1.42532
Mother Machine	untreated	1.37918	1.35509	1.70024	1.70233	1.70129	1.03299
Mother Machine	untreated	1.18411	2.05262	1.70129	2.10573	1.90351	1.33323
Mother Machine	untreated	1.5773	1.40757	1.90351	1.63827	1.77089	1.21399
Mother Machine	untreated	1.7668	1.6701	2.15547	2.64802	2.40174	1.03516
Mother Machine	untreated	1.50665	1.61052	1.82458	1.84537	1.83497	1.2822
Mother Machine	untreated	1.31565	1.36218	1.82458	1.31008	1.56733	1.1105
Mother Machine	untreated	1.70632	1.74418	2.40174	2.16663	2.28419	1.16631
Mother Machine	untreated	1.57819	1.15765	1.83497	1.69009	1.76253	0.973304
Mother Machine	untreated	1.50884	1.39923	1.83497	1.30875	1.57186	1.33621
Mother Machine	untreated	1.5719	1.53438	1.56733	1.84812	1.70772	1.39855
Mother Machine	untreated	1.43963	1.68791	1.70772	1.69083	1.69927	1.42826
Mother Machine	untreated	1.44751	1.47752	1.57186	1.95791	1.76489	1.16015
Mother Machine	untreated	1.24555	1.35725	1.76253	1.39344	1.57799	1.02481
Mother Machine	untreated	1.38847	1.3517	1.76253	1.36533	1.56393	1.17624
Mother Machine	untreated	1.25063	1.61492	1.57799	1.44491	1.51145	1.35411
Mother Machine	untreated	1.24575	1.35144	1.57799	1.04046	1.30922	1.28797
Mother Machine	untreated	1.37964	1.23876	1.56393	1.46194	1.51294	1.10546
Mother Machine	untreated	1.37415	1.21972	1.56393	1.44805	1.50599	1.08788
Mother Machine	untreated	1.38139	1.27838	1.51294	1.88616	1.69955	0.960214
Mother Machine	untreated	1.31158	1.42518	1.51294	1.24992	1.38143	1.35533
Mother Machine	untreated	1.24929	1.48721	1.30922	2.084	1.69661	1.03989
Mother Machine	untreated	1.24855	1.59174	1.50599	1.50473	1.50536	1.33493
Mother Machine	untreated	1.31765	1.28346	1.56616	1.58423	1.5752	1.02591
Mother Machine	untreated	1.17967	1.30315	1.56616	1.05495	1.31056	1.17226
Mother Machine	untreated	1.50482	1.66637	1.83679	1.82996	1.83338	1.33781
Mother Machine	untreated	1.50999	1.36287	1.83679	1.67358	1.75518	1.11768
Mother Machine	untreated	1.18613	1.49315	1.31056	1.84175	1.57615	1.10313
Mother Machine	untreated	1.24857	1.6029	1.31056	2.22369	1.76712	1.08434
Mother Machine	untreated	1.31614	1.41856	1.5752	1.5644	1.5698	1.1649
Mother Machine	untreated	1.18747	1.48409	1.5752	1.57951	1.57735	1.0942
Mother Machine	untreated	1.3121	1.88029	1.75518	1.2507	1.50294	1.68945
Mother Machine	untreated	1.24946	1.50029	1.57735	1.45584	1.5166	1.23315
Mother Machine	untreated	1.38586	1.35293	1.57735	1.56082	1.56909	1.1697
Mother Machine	untreated	1.44144	1.62345	1.57615	1.68713	1.63164	1.43325
Mother Machine	untreated	1.37582	1.43082	1.5698	2.35019	1.96	0.846644
Mother Machine	untreated	1.17969	1.4171	1.5698	1.44615	1.50798	1.08882
Mother Machine	untreated	1.18457	1.42641	1.50798	2.53836	2.02317	0.587807
Mother Machine	untreated	1.37695	2.05905	1.5166	1.49902	1.50781	1.92819
Mother Machine	untreated	1.38295	1.742	1.56909	1.83833	1.70371	1.42124
Mother Machine	untreated	1.24847	1.43017	1.56909	2.09509	1.83209	0.846553
Mother Machine	untreated	1.57229	1.50006	1.70371	1.81512	1.75941	1.31294
Mother Machine	untreated	1.5707	1.23392	1.70371	1.69521	1.69946	1.10516
Mother Machine	untreated	1.63793	1.21837	1.50781	1.67379	1.5908	1.2655
Mother Machine	untreated	1.30802	1.87017	1.5908	2.07	1.8304	1.34779
Mother Machine	untreated	1.56964	1.16789	1.75941	1.31294	1.53617	1.20135
Mother Machine	untreated	1.37885	1.2234	1.75941	1.31294	1.53617	1.06608
Mother Machine	untreated	1.38034	1.56132	1.53617	2.00923	1.7727	1.16895
Mother Machine	untreated	1.38188	1.28391	1.53617	1.35544	1.44581	1.21998
Mother Machine	untreated	1.44845	1.48089	1.7727	1.76452	1.76861	1.16072
Mother Machine	untreated	1.18207	1.22474	1.57547	1.30482	1.44015	0.966665
Mother Machine	untreated	1.18076	1.43044	1.57547	1.18273	1.3791	1.2321
Mother Machine	untreated	1.17869	1.37289	1.43653	1.32536	1.38095	1.17063
Mother Machine	untreated	1.25114	1.49186	1.43653	1.83123	1.63388	1.10912
Mother Machine	untreated	1.58222	1.35979	1.57153	1.96278	1.76716	1.17485
Mother Machine	untreated	1.38172	1.61114	1.57153	1.56848	1.57001	1.42285
Mother Machine	untreated	1.11705	1.63473	1.44015	1.30542	1.37278	1.379
Mother Machine	untreated	1.17623	1.24551	1.44015	1.57375	1.50695	0.914785
Mother Machine	untreated	1.11849	1.22861	1.3791	1.50181	1.44045	0.90665
Mother Machine	untreated	1.30717	1.37492	1.3791	1.8917	1.6354	1.04669
Mother Machine	untreated	1.18091	1.3595	1.38095	1.50414	1.44254	1.09787
Mother Machine	untreated	1.44509	1.23126	1.57001	1.3173	1.44365	1.2327
Mother Machine	untreated	1.19107	1.49018	1.44045	1.5751	1.50777	1.17347
Mother Machine	untreated	1.04808	1.55617	1.44045	1.58906	1.51476	1.08949
Mother Machine	untreated	1.24768	1.6276	1.50695	1.37132	1.43914	1.43614
Mother Machine	untreated	1.05317	1.29939	1.50695	1.52084	1.5139	0.838656
Mother Machine	untreated	1.45268	1.08843	1.50777	1.62489	1.56633	0.974771
Mother Machine	untreated	1.50818	1.17116	1.43914	2.23296	1.83605	0.843286
Mother Machine	untreated	1.25811	1.06932	1.57504	1.43515	1.50509	0.822339
Mother Machine	untreated	1.50846	1.48967	1.7026	2.10359	1.90309	1.09504
Mother Machine	untreated	1.57038	1.41271	1.7026	1.69594	1.69927	1.28382
Mother Machine	untreated	1.31185	1.09727	1.90309	0.983498	1.4433	0.96582
Mother Machine	untreated	1.57259	1.37135	1.57626	1.56892	1.57259	1.37135
Mother Machine	untreated	1.30947	1.87543	1.50661	1.3859	1.44625	1.73865
Mother Machine	untreated	1.57091	1.74234	1.50661	2.29011	1.89836	1.41489
Mother Machine	untreated	1.82254	1.38087	1.5668	1.80332	1.68506	1.51835
Mother Machine	untreated	1.7692	1.09244	1.5668	1.80332	1.68506	1.17657
Mother Machine	untreated	1.63722	0.652222	1.68506	1.71553	1.7003	0.589144
Mother Machine	untreated	1.70256	1.74148	1.89836	1.5077	1.70303	1.74101
Mother Machine	untreated	1.44675	1.355	1.63595	1.6429	1.63942	1.16232
Mother Machine	untreated	1.30816	1.56728	1.63595	1.64902	1.64248	1.23296
Mother Machine	untreated	1.30978	1.23968	1.76671	1.12019	1.44345	1.106
Mother Machine	untreated	1.5768	1.41128	1.76671	1.76818	1.76744	1.22063
Mother Machine	untreated	1.1828	1.36312	1.44345	1.5622	1.50283	1.04309
Mother Machine	untreated	1.44677	1.4823	1.63942	1.894	1.76671	1.16236
Mother Machine	untreated	1.3133	1.42061	1.63942	1.49109	1.56526	1.16865
Mother Machine	untreated	1.31917	1.40996	1.56526	1.96765	1.76646	0.962676
Mother Machine	untreated	1.38757	2.06893	1.56526	2.22798	1.89662	1.55988
Mother Machine	untreated	1.37348	1.24119	1.50707	1.89985	1.70346	0.91121
Mother Machine	untreated	1.38421	1.29282	1.50707	1.26136	1.38421	1.29282
Mother Machine	untreated	1.31543	1.30398	1.57547	1.21289	1.39418	1.22524
Mother Machine	untreated	1.37276	1.11408	1.31326	1.70089	1.50707	0.979759
Mother Machine	untreated	1.24588	1.24307	1.70346	1.58493	1.6442	0.84475
Mother Machine	untreated	1.31006	1.54333	1.38421	1.6244	1.50431	1.34908
Mother Machine	untreated	1.25007	1.56303	1.38421	1.5008	1.44251	1.37059
Mother Machine	untreated	1.24534	1.36538	1.39418	1.48357	1.43887	1.17184
Mother Machine	untreated	1.24703	1.42056	1.39418	1.7428	1.56849	1.0991
Mother Machine	untreated	1.31088	1.43007	1.44251	1.5749	1.5087	1.23225
Mother Machine	untreated	1.18039	1.37152	1.43887	1.43453	1.4367	1.1152
Mother Machine	untreated	1.17859	1.48781	1.31607	1.5701	1.44308	1.22331
Mother Machine	untreated	1.18671	1.79968	1.31607	1.83183	1.57395	1.41244
Mother Machine	untreated	1.63575	1.36448	1.8305	2.083	1.95675	1.04348
Mother Machine	untreated	1.30911	1.55372	1.8305	1.45138	1.64094	1.22189
Mother Machine	untreated	1.30991	1.35479	1.83522	1.17336	1.50429	1.16041
Mother Machine	untreated	1.43857	1.36365	1.64094	1.49454	1.56774	1.23448
Mother Machine	untreated	1.32253	1.67022	1.50429	1.12024	1.31226	1.68048
Mother Machine	untreated	1.24303	1.48522	1.50429	1.90578	1.70504	1.02321
Mother Machine	untreated	1.37791	1.41476	1.31226	1.5714	1.44183	1.35084
Mother Machine	untreated	1.31653	1.2832	1.44183	1.58335	1.51259	1.08714
Mother Machine	untreated	1.12415	1.68461	1.26814	2.00138	1.63476	1.174
Mother Machine	untreated	1.5109	1.61268	1.26814	2.27817	1.77315	1.35042
Mother Machine	untreated	1.44586	1.48337	1.63476	2.16699	1.90088	1.02835
Mother Machine	untreated	1.37763	1.10263	1.6321	1.6538	1.64295	0.837313
Mother Machine	untreated	1.18014	1.29696	1.7677	1.51298	1.64034	0.836756
Mother Machine	untreated	1.50984	1.28853	1.63774	1.64251	1.64012	1.15824
Mother Machine	untreated	1.24941	1.29076	1.63774	1.38275	1.51024	1.02993
Mother Machine	untreated	1.24664	1.74377	1.64012	1.51236	1.57624	1.41416
Mother Machine	untreated	1.1802	1.36194	1.51024	1.24138	1.37581	1.16633
Mother Machine	untreated	1.30687	1.2326	1.44105	1.95867	1.69986	0.839608
Mother Machine	untreated	1.18612	1.55496	1.57813	1.80473	1.69143	1.04965
Mother Machine	untreated	1.38014	1.28607	1.50164	2.3053	1.90347	0.762746
Mother Machine	untreated	1.2492	1.29226	1.50164	1.51466	1.50815	1.03331
Mother Machine	untreated	1.24593	1.42306	1.90347	1.35662	1.63005	1.03894
Mother Machine	untreated	1.38088	1.42311	1.90347	1.63271	1.76809	1.03591
Mother Machine	untreated	1.31569	1.4974	1.50448	1.77875	1.64161	1.17147
Mother Machine	untreated	1.11542	1.42894	1.50448	1.65004	1.57726	0.967097
Mother Machine	0.25 ug/mL A22	1.31325	1.61194	1.27437	1.20758	1.24097	1.68422
Mother Machine	0.25 ug/mL A22	1.5049	1.23564	1.24097	1.438	1.33949	1.40105
Mother Machine	0.25 ug/mL A22	1.37228	1.23201	1.24097	1.438	1.33949	1.26481
Mother Machine	0.25 ug/mL A22	1.31044	1.55975	1.33949	1.21074	1.27511	1.59508
Mother Machine	0.25 ug/mL A22	1.31618	1.43301	1.33949	1.29287	1.31618	1.43301
Mother Machine	0.25 ug/mL A22	1.31543	1.74619	1.27511	1.33687	1.30599	1.75563
Mother Machine	0.25 ug/mL A22	1.63422	1.23354	1.27511	1.33687	1.30599	1.56177
Mother Machine	0.25 ug/mL A22	1.43917	1.49448	1.30599	1.43504	1.37052	1.56313
Mother Machine	0.25 ug/mL A22	1.50686	1.2993	1.30599	1.83707	1.57153	1.23463
Mother Machine	0.25 ug/mL A22	1.56979	1.68521	1.30599	1.31089	1.30844	1.94656
Mother Machine	0.25 ug/mL A22	1.44218	1.41506	1.57153	1.03825	1.30489	1.55234
Mother Machine	0.25 ug/mL A22	1.43947	1.61489	1.37052	1.30783	1.33917	1.71518
Mother Machine	0.25 ug/mL A22	1.57098	1.69297	1.30844	1.48002	1.39423	1.86972
Mother Machine	0.25 ug/mL A22	1.50156	1.23834	1.50326	1.17559	1.33943	1.40048
Mother Machine	0.25 ug/mL A22	1.50715	1.37061	1.4421	1.30726	1.37468	1.50308
Mother Machine	0.25 ug/mL A22	1.38924	1.41867	1.37468	1.64136	1.50802	1.29988
Mother Machine	0.25 ug/mL A22	1.4474	1.67937	1.33943	1.53307	1.43625	1.69052
Mother Machine	0.25 ug/mL A22	1.31123	1.56176	1.50802	1.36513	1.43657	1.43642
Mother Machine	0.25 ug/mL A22	1.37323	1.62452	1.43625	1.484	1.46013	1.53762
Mother Machine	0.25 ug/mL A22	1.50165	1.76348	1.43657	1.56966	1.50312	1.76201
Mother Machine	0.25 ug/mL A22	1.31067	1.85963	1.43657	1.18477	1.31067	1.85963
Mother Machine	0.25 ug/mL A22	1.57644	1.87663	1.46013	1.47858	1.46935	1.98371
Mother Machine	0.25 ug/mL A22	1.57196	1.55899	1.50312	1.3664	1.43476	1.69619
Mother Machine	0.25 ug/mL A22	1.5713	1.54615	1.31067	1.85963	1.58515	1.53229
Mother Machine	0.25 ug/mL A22	1.57298	1.8175	1.31067	1.85963	1.58515	1.80533
Mother Machine	0.25 ug/mL A22	1.31325	1.61194	1.27437	1.20758	1.24097	1.68422
Mother Machine	0.25 ug/mL A22	1.5049	1.23564	1.24097	1.438	1.33949	1.40105
Mother Machine	0.25 ug/mL A22	1.37228	1.23201	1.24097	1.438	1.33949	1.26481
Mother Machine	0.25 ug/mL A22	1.31044	1.55975	1.33949	1.21074	1.27511	1.59508
Mother Machine	0.25 ug/mL A22	1.31618	1.43301	1.33949	1.29287	1.31618	1.43301
Mother Machine	0.25 ug/mL A22	1.31543	1.74619	1.27511	1.33687	1.30599	1.75563
Mother Machine	0.25 ug/mL A22	1.63422	1.23354	1.27511	1.33687	1.30599	1.56177
Mother Machine	0.25 ug/mL A22	1.43917	1.49448	1.30599	1.43504	1.37052	1.56313
Mother Machine	0.25 ug/mL A22	1.50686	1.2993	1.30599	1.83707	1.57153	1.23463
Mother Machine	0.25 ug/mL A22	1.56979	1.68521	1.30599	1.31089	1.30844	1.94656
Mother Machine	0.25 ug/mL A22	1.44218	1.41506	1.57153	1.03825	1.30489	1.55234
Mother Machine	0.25 ug/mL A22	1.43947	1.61489	1.37052	1.30783	1.33917	1.71518
Mother Machine	0.25 ug/mL A22	1.57098	1.69297	1.30844	1.48002	1.39423	1.86972
Mother Machine	0.25 ug/mL A22	1.50156	1.23834	1.50326	1.17559	1.33943	1.40048
Mother Machine	0.25 ug/mL A22	1.50715	1.37061	1.4421	1.30726	1.37468	1.50308
Mother Machine	0.25 ug/mL A22	1.38924	1.41867	1.37468	1.64136	1.50802	1.29988
Mother Machine	0.25 ug/mL A22	1.4474	1.67937	1.33943	1.53307	1.43625	1.69052
Mother Machine	0.25 ug/mL A22	1.31123	1.56176	1.50802	1.36513	1.43657	1.43642
Mother Machine	0.25 ug/mL A22	1.37323	1.62452	1.43625	1.484	1.46013	1.53762
Mother Machine	0.25 ug/mL A22	1.50165	1.76348	1.43657	1.56966	1.50312	1.76201
Mother Machine	0.25 ug/mL A22	1.31067	1.85963	1.43657	1.18477	1.31067	1.85963
Mother Machine	0.25 ug/mL A22	1.57644	1.87663	1.46013	1.47858	1.46935	1.98371
Mother Machine	0.25 ug/mL A22	1.57196	1.55899	1.50312	1.3664	1.43476	1.69619
Mother Machine	0.25 ug/mL A22	1.5713	1.54615	1.31067	1.85963	1.58515	1.53229
Mother Machine	0.25 ug/mL A22	1.57298	1.8175	1.31067	1.85963	1.58515	1.80533
Mother Machine	0.25 ug/mL A22	1.63263	1.73825	1.5695	2.09034	1.82992	1.54096
Mother Machine	0.25 ug/mL A22	1.57427	1.48576	1.37511	1.30163	1.33837	1.72166
Mother Machine	0.25 ug/mL A22	1.50983	1.22337	1.46706	1.54009	1.50358	1.22963
Mother Machine	0.25 ug/mL A22	1.37645	1.49579	1.50358	1.24932	1.37645	1.49579
Mother Machine	0.25 ug/mL A22	1.25268	1.54009	1.50358	1.00179	1.25268	1.54009
Mother Machine	0.25 ug/mL A22	1.6377	1.54137	1.37184	1.81678	1.59431	1.58476
Mother Machine	0.25 ug/mL A22	1.50141	1.49248	1.59431	1.39592	1.49511	1.49877
Mother Machine	0.25 ug/mL A22	1.56928	1.55985	1.59431	1.39592	1.49511	1.63401
Mother Machine	0.25 ug/mL A22	1.44091	1.66696	1.49511	1.65192	1.57351	1.53436
Mother Machine	0.25 ug/mL A22	1.57684	1.66837	1.49511	1.65856	1.57684	1.66837
Mother Machine	0.25 ug/mL A22	1.44107	1.99146	1.49511	1.63401	1.56456	1.86797
Mother Machine	0.25 ug/mL A22	1.50637	1.16179	1.33321	1.59531	1.46426	1.2039
Mother Machine	0.25 ug/mL A22	1.63036	1.49707	1.57351	1.30382	1.43867	1.68876
Mother Machine	0.25 ug/mL A22	1.69974	1.54068	1.56456	1.62518	1.59487	1.64554
Mother Machine	0.25 ug/mL A22	1.57512	1.33865	1.57684	1.66837	1.6226	1.29116
Mother Machine	0.25 ug/mL A22	1.64294	1.55363	1.57684	1.66837	1.6226	1.57396
Mother Machine	0.25 ug/mL A22	1.56806	1.67484	1.43867	1.68876	1.56371	1.67919
Mother Machine	0.25 ug/mL A22	1.56729	1.56587	1.6226	1.9256	1.7741	1.35906
Mother Machine	0.25 ug/mL A22	1.63854	1.43409	1.56813	1.49625	1.53219	1.54044
Mother Machine	0.25 ug/mL A22	1.63298	1.86337	1.56813	1.49625	1.53219	1.96415
Mother Machine	0.25 ug/mL A22	1.50985	1.48797	1.53219	1.33714	1.43466	1.56316
Mother Machine	0.25 ug/mL A22	1.43849	1.61063	1.37832	1.17395	1.27613	1.77299
Mother Machine	0.25 ug/mL A22	1.57378	1.27301	1.2501	2.01519	1.63264	1.21414
Mother Machine	0.25 ug/mL A22	1.44251	0.966658	1.63264	1.25237	1.44251	0.966658
Mother Machine	0.25 ug/mL A22	1.57637	1.27215	1.30953	1.84321	1.57637	1.27215
Mother Machine	0.25 ug/mL A22	1.43782	1.49193	1.57637	1.29928	1.43782	1.49193
Mother Machine	0.25 ug/mL A22	1.37804	1.15931	1.51171	1.29989	1.4058	1.13155
Mother Machine	0.25 ug/mL A22	1.37475	1.15759	1.51171	1.29989	1.4058	1.12654
Mother Machine	0.25 ug/mL A22	1.1923	1.74787	1.4058	0.829753	1.11777	1.8224
Mother Machine	0.25 ug/mL A22	1.37953	1.41979	1.4058	1.47395	1.43987	1.35945
Mother Machine	0.25 ug/mL A22	1.57378	1.27301	1.2501	2.01519	1.63264	1.21414
Mother Machine	0.25 ug/mL A22	1.44251	0.966658	1.63264	1.25237	1.44251	0.966658
Mother Machine	0.25 ug/mL A22	1.57637	1.27215	1.30953	1.84321	1.57637	1.27215
Mother Machine	0.25 ug/mL A22	1.43782	1.49193	1.57637	1.29928	1.43782	1.49193
Mother Machine	0.25 ug/mL A22	1.37804	1.15931	1.51171	1.29989	1.4058	1.13155
Mother Machine	0.25 ug/mL A22	1.37475	1.15759	1.51171	1.29989	1.4058	1.12654
Mother Machine	0.25 ug/mL A22	1.1923	1.74787	1.4058	0.829753	1.11777	1.8224
Mother Machine	0.25 ug/mL A22	1.37953	1.41979	1.4058	1.47395	1.43987	1.35945
Mother Machine	0.25 ug/mL A22	1.44266	1.157	1.44282	1.35362	1.39822	1.20143
Mother Machine	0.25 ug/mL A22	1.38166	1.55156	1.38338	1.35827	1.37083	1.56239
Mother Machine	0.25 ug/mL A22	1.37662	1.36308	1.38338	1.35827	1.37083	1.36887
Mother Machine	0.25 ug/mL A22	1.56884	1.62436	1.4475	1.10637	1.27693	1.91626
Mother Machine	0.25 ug/mL A22	1.38049	1.43128	1.37083	1.36887	1.36985	1.44193
Mother Machine	0.25 ug/mL A22	1.63743	1.17881	1.37633	1.11033	1.24333	1.5729
Mother Machine	0.25 ug/mL A22	1.51071	1.41333	1.44297	1.57844	1.51071	1.41333
Mother Machine	0.25 ug/mL A22	1.4414	1.47949	1.51071	1.22005	1.36538	1.55551
Mother Machine	0.25 ug/mL A22	1.5698	1.48887	1.51071	1.22005	1.36538	1.69328
Mother Machine	0.25 ug/mL A22	1.4451	1.87958	1.36538	1.55551	1.46045	1.86423
Mother Machine	0.25 ug/mL A22	1.37797	1.42549	1.37555	1.50712	1.44133	1.36212
Mother Machine	0.25 ug/mL A22	1.24255	1.96006	1.44133	1.36212	1.40173	1.80088
Mother Machine	0.25 ug/mL A22	1.57296	1.3474	1.40173	1.34358	1.37266	1.5477
Mother Machine	0.25 ug/mL A22	1.57208	1.16919	1.37266	1.3628	1.36773	1.37355
Mother Machine	0.25 ug/mL A22	1.37797	1.42549	1.37555	1.50712	1.44133	1.36212
Mother Machine	0.25 ug/mL A22	1.24255	1.96006	1.44133	1.36212	1.40173	1.80088
Mother Machine	0.25 ug/mL A22	1.57296	1.3474	1.40173	1.34358	1.37266	1.5477
Mother Machine	0.25 ug/mL A22	1.57208	1.16919	1.37266	1.3628	1.36773	1.37355
Mother Machine	0.25 ug/mL A22	1.57361	1.86245	1.57273	1.82659	1.69966	1.7364
Mother Machine	0.25 ug/mL A22	1.63462	1.73543	1.77387	1.61991	1.69689	1.67316
Mother Machine	0.25 ug/mL A22	1.44314	1.49514	1.23679	1.29147	1.26413	1.67414
Mother Machine	0.25 ug/mL A22	1.44962	1.41141	1.17625	1.31542	1.24584	1.61519
Mother Machine	0.25 ug/mL A22	1.44345	1.54261	1.39033	1.49658	1.44345	1.54261
Mother Machine	0.25 ug/mL A22	1.37746	1.47951	1.44345	1.54261	1.49303	1.36394
Mother Machine	0.25 ug/mL A22	1.37832	1.60709	1.44027	1.5348	1.48753	1.49788
Mother Machine	0.25 ug/mL A22	1.57041	1.48778	1.44027	1.5348	1.48753	1.57066
Mother Machine	0.25 ug/mL A22	1.56915	1.23446	1.49303	1.66369	1.57836	1.22525
Mother Machine	0.25 ug/mL A22	1.50589	1.37381	1.48753	1.52425	1.50589	1.37381
Mother Machine	0.25 ug/mL A22	1.51044	1.35614	1.48753	1.3092	1.39837	1.46822
Mother Machine	0.25 ug/mL A22	1.57743	1.8642	1.39837	1.26477	1.33157	2.11006
Mother Machine	0.25 ug/mL A22	1.31198	1.55493	1.36594	1.39123	1.37858	1.48832
Mother Machine	0.25 ug/mL A22	1.44505	1.61947	1.37858	1.50482	1.4417	1.62282
Mother Machine	0.25 ug/mL A22	1.56828	1.49492	1.3045	1.61119	1.45784	1.60536
Mother Machine	0.25 ug/mL A22	1.50388	1.1052	1.45784	1.34858	1.40321	1.20586
Mother Machine	0.25 ug/mL A22	1.37961	1.28052	1.40321	1.356	1.37961	1.28052
Mother Machine	0.25 ug/mL A22	1.24153	1.37572	1.40321	1.07985	1.24153	1.37572
Mother Machine	0.25 ug/mL A22	1.30613	1.43869	1.24311	1.37087	1.30699	1.43782
Mother Machine	0.25 ug/mL A22	1.37819	1.36026	1.24311	1.37087	1.30699	1.43146
Mother Machine	0.25 ug/mL A22	1.44273	1.2294	1.3408	1.00353	1.17217	1.49996
Mother Machine	0.25 ug/mL A22	1.31428	1.56222	1.17217	1.30528	1.23872	1.63777
Mother Machine	0.25 ug/mL A22	1.43911	1.49741	1.17217	1.30528	1.23872	1.6978
Mother Machine	0.25 ug/mL A22	1.38404	1.41599	1.30699	1.46108	1.38404	1.41599
Mother Machine	0.25 ug/mL A22	1.44846	0.69918	1.37283	1.23542	1.30413	0.843512
Mother Machine	0.25 ug/mL A22	1.3754	1.16571	1.37554	1.37526	1.3754	1.16571
Mother Machine	0.25 ug/mL A22	1.37749	1.23358	1.27907	1.47592	1.37749	1.23358
Mother Machine	0.25 ug/mL A22	1.31026	1.68053	1.27907	1.34144	1.31026	1.68053
Mother Machine	0.25 ug/mL A22	1.37924	1.42265	1.24516	1.23801	1.24158	1.56031
Mother Machine	0.25 ug/mL A22	1.50978	1.42565	1.31026	1.68053	1.49539	1.44003
Mother Machine	0.25 ug/mL A22	1.44505	1.56285	1.24158	1.64851	1.44505	1.56285
Mother Machine	0.25 ug/mL A22	1.31483	1.85394	1.26971	1.48005	1.37488	1.79389
Mother Machine	0.25 ug/mL A22	1.24988	1.61592	1.26971	1.23004	1.24988	1.61592
Mother Machine	0.25 ug/mL A22	1.70467	1.29674	1.37488	1.5753	1.47509	1.52632
Mother Machine	0.25 ug/mL A22	1.7007	1.41383	1.46908	1.5274	1.49824	1.61629
Mother Machine	0.25 ug/mL A22	1.50947	1.21611	1.46908	1.26103	1.36505	1.36053
Mother Machine	0.25 ug/mL A22	1.374	1.4309	1.46908	1.5274	1.49824	1.30666
Mother Machine	0.25 ug/mL A22	1.43998	1.36711	1.40904	1.13442	1.27173	1.53536
Mother Machine	0.25 ug/mL A22	1.50946	1.53748	1.40904	1.33308	1.37106	1.67589
Mother Machine	0.25 ug/mL A22	1.44531	1.42199	1.27173	1.3971	1.33441	1.53289
Mother Machine	0.25 ug/mL A22	1.38087	1.75614	1.23861	1.69628	1.46744	1.66957
Mother Machine	0.25 ug/mL A22	1.57322	1.56826	1.44099	1.54897	1.49498	1.6465
Mother Machine	0.25 ug/mL A22	1.50631	1.5995	1.44099	1.54897	1.49498	1.61083
Mother Machine	0.25 ug/mL A22	1.38067	1.36235	1.44776	1.2899	1.36883	1.37419
Mother Machine	0.25 ug/mL A22	1.44365	1.30301	1.43743	1.54311	1.49027	1.25638
Mother Machine	0.25 ug/mL A22	1.44101	1.36101	1.43743	1.54311	1.49027	1.31175
Mother Machine	0.25 ug/mL A22	1.5058	1.89038	1.49027	1.12157	1.30592	2.09026
Mother Machine	0.25 ug/mL A22	1.44099	1.54897	1.50474	1.37724	1.44099	1.54897
Mother Machine	0.25 ug/mL A22	1.57322	1.56826	1.44099	1.54897	1.49498	1.6465
Mother Machine	0.25 ug/mL A22	1.50631	1.5995	1.44099	1.54897	1.49498	1.61083
Mother Machine	0.25 ug/mL A22	1.64286	1.08518	1.39135	1.89437	1.64286	1.08518
Mother Machine	0.25 ug/mL A22	1.43586	1.42501	1.39135	1.48038	1.43586	1.42501
Mother Machine	0.25 ug/mL A22	1.5673	1.68028	1.64286	1.08518	1.36402	1.88355
Mother Machine	0.25 ug/mL A22	1.44289	1.61882	1.43586	1.04532	1.24059	1.82112
Mother Machine	0.25 ug/mL A22	1.37525	1.49483	1.43586	1.04532	1.24059	1.62949
Mother Machine	0.25 ug/mL A22	1.50909	1.17004	1.24059	1.30613	1.27336	1.40577
Mother Machine	0.25 ug/mL A22	1.57149	1.29858	1.24059	1.68067	1.46063	1.40943
Mother Machine	0.25 ug/mL A22	1.57059	1.17008	1.24059	1.68067	1.46063	1.28005
Mother Machine	0.25 ug/mL A22	1.51249	1.594	1.46063	1.08378	1.27221	1.83429
Mother Machine	0.25 ug/mL A22	1.38311	1.59754	1.27336	1.61088	1.44212	1.53853
Mother Machine	0.25 ug/mL A22	1.38091	1.75194	1.27336	1.62398	1.44867	1.68418
Mother Machine	0.25 ug/mL A22	1.57777	1.75574	1.27221	1.88333	1.57777	1.75574
Mother Machine	0.25 ug/mL A22	1.63743	1.73656	1.37059	1.90427	1.63743	1.73656
Mother Machine	0.25 ug/mL A22	1.45115	1.22892	1.37059	1.30382	1.33721	1.34286
Mother Machine	0.25 ug/mL A22	1.51065	1.29426	1.37059	1.30382	1.33721	1.4677
Mother Machine	0.25 ug/mL A22	1.24326	1.74279	1.33721	1.34286	1.34004	1.64602
Mother Machine	0.25 ug/mL A22	1.5699	1.36843	1.33721	1.15342	1.24531	1.69302
Mother Machine	0.25 ug/mL A22	1.50884	1.23025	1.44311	1.35976	1.40143	1.33765
Mother Machine	0.25 ug/mL A22	1.18323	1.87189	1.40143	0.965035	1.18323	1.87189
Mother Machine	0.25 ug/mL A22	1.56981	1.22123	1.40143	1.73819	1.56981	1.22123
Mother Machine	0.25 ug/mL A22	1.3084	1.42624	1.56981	1.04699	1.3084	1.42624
Mother Machine	0.25 ug/mL A22	1.31054	1.2361	1.3084	1.31268	1.31054	1.2361
Mother Machine	0.25 ug/mL A22	1.37848	1.61257	1.31054	1.44307	1.3768	1.61425
Mother Machine	0.25 ug/mL A22	1.5037	1.87695	1.30263	1.57114	1.43689	1.94377
Mother Machine	0.25 ug/mL A22	1.50352	1.23857	1.30263	1.17784	1.24023	1.50186
Mother Machine	0.25 ug/mL A22	1.64562	1.15023	1.30263	1.17784	1.24023	1.55562
Mother Machine	0.25 ug/mL A22	1.37699	1.49859	1.24023	1.55562	1.39793	1.47764
Mother Machine	0.25 ug/mL A22	1.37839	1.55824	1.24023	1.55562	1.39793	1.5387
Mother Machine	0.25 ug/mL A22	1.50611	1.17247	1.39793	1.5387	1.46831	1.21026
Mother Machine	0.25 ug/mL A22	1.37941	1.34682	1.46831	1.41701	1.44266	1.28357
Mother Machine	0.25 ug/mL A22	1.50925	1.49008	1.44266	1.16936	1.30601	1.69333
Mother Machine	0.25 ug/mL A22	1.31904	1.49126	1.43862	1.19945	1.31904	1.49126
Mother Machine	0.25 ug/mL A22	1.37725	1.49105	1.31451	1.22122	1.26786	1.60045
Mother Machine	0.25 ug/mL A22	1.50705	1.5653	1.27402	1.60235	1.43818	1.63417
Mother Machine	0.25 ug/mL A22	1.50749	1.41614	1.43818	1.63417	1.53617	1.38745
Mother Machine	0.25 ug/mL A22	1.50546	1.55855	1.26786	1.60045	1.43415	1.62985
Mother Machine	0.25 ug/mL A22	1.37602	1.56081	1.43415	1.36897	1.40156	1.53526
Mother Machine	0.25 ug/mL A22	1.50337	1.55128	1.44476	1.74593	1.59535	1.4593
Mother Machine	0.25 ug/mL A22	1.44097	1.28837	1.59535	1.55944	1.57739	1.15194
Mother Machine	0.25 ug/mL A22	1.3763	1.68543	1.31637	1.43493	1.37565	1.68607
Mother Machine	0.25 ug/mL A22	1.37654	1.69665	1.37856	1.37453	1.37654	1.69665
[truncated: 3,454 more rows]

## Sheet: Fig3_Sup3
condition	Growth rate (min-1)	Length (um)	Width (um)	Interdivision time (min)	I period (min)	C period (min)	D period (min)	zetaG	zetaI	zetaCD
[truncated: 6 more rows]

[truncated: 1 more sheets: Fig3_Sup3_clouds]
