# Supplementary material for: Two different cell-cycle processes determine the timing of cell division in Escherichia coli
Source: eLife journal article supplement (doi:10.7554/elife.67495), 2021-10-06
Supplement: supp [file elife-67495-supp-v1.zip › elife_poa_e67495_Figure_4_source_data_1.xls]

## Sheet: Fig4B
condition	A22 concentration	Average D period (min)	p_H
Mother Machine	0	26.1652	0.538647
Mother Machine	0	19.3192	0.534896
Mother Machine	0	19.0609	0.641022
Mother Machine	0.25	34.9277	0.654496
Mother Machine	0.25	20.6622	0.489786
Mother Machine	0.25	28.3878	0.723726
Mother Machine	0.25	35.9695	0.701408
Mother Machine	0.5	38.2703	0.740895
Mother Machine	0.5	70.1199	1.07117
Mother Machine	0.5	41.4783	0.748411
Mother Machine	0.5	37.7647	0.711881
Mother Machine	1	88.6346	0.866773
Mother Machine	1	74.0305	1.09779
Mother Machine	1	44.2308	0.820401

## Sheet: Fig4C
condition	A22 concentration	C+D adder slope	interdivision adder slope
Mother Machine	0	-0.0422525	-0.0139243
Mother Machine	0	-0.0355108	0.0192666
Mother Machine	0	-0.232065	-0.142375
Mother Machine	0.25	-0.257913	-0.0619296
Mother Machine	0.25	0.0444368	0.0723524
Mother Machine	0.25	-0.394068	-0.166515
Mother Machine	0.25	-0.349551	-0.274056
Mother Machine	0.5	-0.42873	-0.281702
Mother Machine	0.5	-1.17461	-0.570746
Mother Machine	0.5	-0.44402	-0.000572138
Mother Machine	0.5	-0.370367	-0.111954
Mother Machine	1	-0.694464	-0.285739
Mother Machine	1	-1.24212	-0.356094
Mother Machine	1	-0.594123	-0.127121

## Sheet: Fig4_Sup1A
data			fit
<tau_D>	p_H		<tau_D>	p_H
26.165163	0.559640		10.000000	0.529606
19.319245	0.564390		11.000000	0.536644
19.060870	0.640897		12.000000	0.543682
34.927694	0.659911		13.000000	0.550720
20.662196	0.551156		14.000000	0.557758
28.387768	0.705105		15.000000	0.564796
35.969543	0.689832		16.000000	0.571834
38.270270	0.738087		17.000000	0.578872
70.119891	1.087225		18.000000	0.585910
41.478261	0.760267		19.000000	0.592948
37.764706	0.729211		20.000000	0.599986
88.634615	0.860779		21.000000	0.607023
74.030534	1.123707		22.000000	0.614061
44.230769	0.834084		23.000000	0.621099
			24.000000	0.628137
			25.000000	0.635175
			26.000000	0.642213
			27.000000	0.649251
			28.000000	0.656289
			29.000000	0.663327
			30.000000	0.670365
			31.000000	0.677403
			32.000000	0.684441
			33.000000	0.691479
			34.000000	0.698516
			35.000000	0.705554
			36.000000	0.712592
			37.000000	0.719630
			38.000000	0.726668
			39.000000	0.733706
			40.000000	0.740744
			41.000000	0.747782
			42.000000	0.754820
			43.000000	0.761858
			44.000000	0.768896
			45.000000	0.775934
			46.000000	0.782972
			47.000000	0.790010
			48.000000	0.797047
			49.000000	0.804085
			50.000000	0.811123
			51.000000	0.818161
			52.000000	0.825199
			53.000000	0.832237
			54.000000	0.839275
			55.000000	0.846313
			56.000000	0.853351
			57.000000	0.860389
			58.000000	0.867427
			59.000000	0.874465
			60.000000	0.881503
			61.000000	0.888540
			62.000000	0.895578
			63.000000	0.902616
			64.000000	0.909654
			65.000000	0.916692
			66.000000	0.923730
			67.000000	0.930768
			68.000000	0.937806
			69.000000	0.944844
			70.000000	0.951882
			71.000000	0.958920
			72.000000	0.965958
			73.000000	0.972996
			74.000000	0.980034
			75.000000	0.987071
			76.000000	0.994109
			77.000000	1.001147
			78.000000	1.008185
			79.000000	1.015223
			80.000000	1.022261
			81.000000	1.029299
			82.000000	1.036337
			83.000000	1.043375
			84.000000	1.050413
			85.000000	1.057451

## Sheet: Fig4_Sup1B
data			fit
<tau_D>	zeta_H		<tau_D>	zeta_H
26.165163	0.141004		10.000000	0.344887
19.319245	0.370894		11.000000	0.334076
19.060870	0.115024		12.000000	0.323264
34.927694	0.264847		13.000000	0.312453
20.662196	0.482001		14.000000	0.301642
28.387768	0.108800		15.000000	0.290830
35.969543	-0.220145		16.000000	0.280019
38.270270	-0.197304		17.000000	0.269208
70.119891	-0.611032		18.000000	0.258396
41.478261	0.246112		19.000000	0.247585
37.764706	0.022056		20.000000	0.236774
88.634615	-0.197558		21.000000	0.225962
74.030534	-0.432956		22.000000	0.215151
44.230769	-0.009736		23.000000	0.204340
			24.000000	0.193528
			25.000000	0.182717
			26.000000	0.171906
			27.000000	0.161094
			28.000000	0.150283
			29.000000	0.139471
			30.000000	0.128660
			31.000000	0.117849
			32.000000	0.107037
			33.000000	0.096226
			34.000000	0.085415
			35.000000	0.074603
			36.000000	0.063792
			37.000000	0.052981
			38.000000	0.042169
			39.000000	0.031358
			40.000000	0.020547
			41.000000	0.009735
			42.000000	-0.001076
			43.000000	-0.011887
			44.000000	-0.022699
			45.000000	-0.033510
			46.000000	-0.044321
			47.000000	-0.055133
			48.000000	-0.065944
			49.000000	-0.076755
			50.000000	-0.087567
			51.000000	-0.098378
			52.000000	-0.109189
			53.000000	-0.120001
			54.000000	-0.130812
			55.000000	-0.141623
			56.000000	-0.152435
			57.000000	-0.163246
			58.000000	-0.174057
			59.000000	-0.184869
			60.000000	-0.195680
			61.000000	-0.206491
			62.000000	-0.217303
			63.000000	-0.228114
			64.000000	-0.238925
			65.000000	-0.249737
			66.000000	-0.260548
			67.000000	-0.271359
			68.000000	-0.282171
			69.000000	-0.292982
			70.000000	-0.303793
			71.000000	-0.314605
			72.000000	-0.325416
			73.000000	-0.336227
			74.000000	-0.347039
			75.000000	-0.357850
			76.000000	-0.368661
			77.000000	-0.379473
			78.000000	-0.390284
			79.000000	-0.401095
			80.000000	-0.411907
			81.000000	-0.422718
			82.000000	-0.433529
			83.000000	-0.444341
			84.000000	-0.455152
			85.000000	-0.465963

## Sheet: Fig4_Sup1C
data
zetaCD	zetaG		x_CC_zeq0	y_CC_zeq0	x_CC_zneq0	y_CC_zneq0	x_ICD	y_ICD
-0.042252	-0.035511		-1.000000	0.000000	-1.220000	-0.460047	-1.000000	-1.000000
-0.232065	-0.257913		-0.960000	-0.019168	-1.180000	-0.441625	-0.960000	-0.999222
0.044437	-0.394068		-0.920000	-0.036695	-1.140000	-0.423029	-0.920000	-0.996886
-0.349551	-0.428730		-0.880000	-0.052612	-1.100000	-0.404221	-0.880000	-0.992994
-1.174613	-0.444020		-0.840000	-0.059977	-1.060000	-0.391549	-0.840000	-0.987545
-0.370367	-0.694464		-0.800000	-0.073538	-1.020000	-0.372316	-0.800000	-0.980540
-1.242121	-0.594123		-0.760000	-0.085567	-0.980000	-0.352787	-0.760000	-0.971977
-0.013924	0.019267		-0.720000	-0.096092	-0.940000	-0.339590	-0.720000	-0.961858
-0.142375	-0.061930		-0.680000	-0.100800	-0.900000	-0.319514	-0.680000	-0.950181
0.072352	-0.166515		-0.640000	-0.109124	-0.860000	-0.305932	-0.640000	-0.936948
-0.274056	-0.281702		-0.600000	-0.116015	-0.820000	-0.285254	-0.600000	-0.922159
-0.570746	-0.000572		-0.560000	-0.121500	-0.780000	-0.264195	-0.560000	-0.905812
-0.111954	-0.285739		-0.520000	-0.125605	-0.740000	-0.249941	-0.520000	-0.887908
-0.356094	-0.127121		-0.480000	-0.128356	-0.700000	-0.228233	-0.480000	-0.868448
			-0.440000	-0.129777	-0.660000	-0.213542	-0.440000	-0.847431
			-0.400000	-0.129469	-0.620000	-0.191180	-0.400000	-0.824857
			-0.360000	-0.127672	-0.580000	-0.176057	-0.360000	-0.800726
			-0.320000	-0.124628	-0.540000	-0.153057	-0.320000	-0.775038
			-0.280000	-0.120359	-0.500000	-0.137520	-0.280000	-0.747794
			-0.240000	-0.114888	-0.460000	-0.113920	-0.240000	-0.718992
			-0.200000	-0.108235	-0.420000	-0.098000	-0.200000	-0.688634
			-0.160000	-0.100421	-0.380000	-0.073858	-0.160000	-0.656719
			-0.120000	-0.086569	-0.340000	-0.049427	-0.120000	-0.623247
			-0.080000	-0.075941	-0.300000	-0.032995	-0.080000	-0.588219
			-0.040000	-0.064222	-0.260000	-0.008156	-0.040000	-0.551633
			0.000000	-0.051430	-0.220000	0.008514	0.000000	-0.513491
			0.040000	-0.030270	-0.180000	0.033653	0.040000	-0.473792
			0.080000	-0.014875	-0.140000	0.058912	0.080000	-0.432536
			0.120000	0.001531	-0.100000	0.075795	0.120000	-0.389723
			0.160000	0.027998	-0.060000	0.101146	0.160000	-0.345353
			0.200000	0.046857	-0.020000	0.126482	0.200000	-0.299427
			0.240000	0.076929	0.020000	0.151744	0.240000	-0.251943
			0.280000	0.098142	0.060000	0.176875	0.280000	-0.202903
			0.320000	0.131673	0.100000	0.201814	0.320000	-0.152306
			0.360000	0.155145	0.140000	0.226496	0.360000	-0.100152
			0.400000	0.191997	0.180000	0.250858	0.400000	-0.046442
			0.440000	0.217639	0.220000	0.274832	0.440000	0.008826
			0.480000	0.257681	0.260000	0.298353	0.480000	0.065650
			0.480000	-0.305444	0.260000	-0.068695	0.480000	-0.499682
			0.440000	-0.307072	0.220000	-0.069936	0.440000	-0.526361
			0.400000	-0.308763	0.180000	-0.072096	0.400000	-0.552309
			0.360000	-0.309380	0.140000	-0.075143	0.360000	-0.577526
			0.320000	-0.309582	0.100000	-0.079046	0.320000	-0.602011
			0.280000	-0.309361	0.060000	-0.083777	0.280000	-0.625767
			0.240000	-0.308710	0.020000	-0.089306	0.240000	-0.648791
			0.200000	-0.306913	-0.020000	-0.095604	0.200000	-0.671084
			0.160000	-0.305158	-0.060000	-0.102645	0.160000	-0.692646
			0.120000	-0.301669	-0.100000	-0.107739	0.120000	-0.713478
			0.080000	-0.298761	-0.140000	-0.115962	0.080000	-0.733578
			0.040000	-0.295379	-0.180000	-0.124862	0.040000	-0.752947
			0.000000	-0.289398	-0.220000	-0.131161	0.000000	-0.771586
			-0.040000	-0.284794	-0.260000	-0.141142	-0.040000	-0.789494
			-0.080000	-0.279686	-0.300000	-0.148143	-0.080000	-0.806670
			-0.120000	-0.274066	-0.340000	-0.159154	-0.120000	-0.823116
			-0.160000	-0.264654	-0.380000	-0.170760	-0.160000	-0.838831
			-0.200000	-0.257712	-0.420000	-0.178821	-0.200000	-0.853815
			-0.240000	-0.250226	-0.460000	-0.191390	-0.240000	-0.868068
			-0.280000	-0.242185	-0.500000	-0.200082	-0.280000	-0.881590
			-0.320000	-0.233579	-0.540000	-0.213585	-0.320000	-0.894381
			-0.360000	-0.224398	-0.580000	-0.222893	-0.360000	-0.906442
			-0.400000	-0.214632	-0.620000	-0.237310	-0.400000	-0.917771
			-0.440000	-0.204269	-0.660000	-0.247224	-0.440000	-0.928369
			-0.480000	-0.193300	-0.700000	-0.262546	-0.480000	-0.938237
			-0.520000	-0.181712	-0.740000	-0.273061	-0.520000	-0.947373
			-0.560000	-0.169494	-0.780000	-0.289288	-0.560000	-0.955779
			-0.600000	-0.156634	-0.820000	-0.306062	-0.600000	-0.963454
			-0.640000	-0.143120	-0.860000	-0.317550	-0.640000	-0.970398
			-0.680000	-0.128940	-0.900000	-0.335248	-0.680000	-0.976610
			-0.720000	-0.114080	-0.940000	-0.347360	-0.720000	-0.982092
			-0.760000	-0.106392	-0.980000	-0.366006	-0.760000	-0.986843
			-0.800000	-0.090489	-1.020000	-0.385235	-0.800000	-0.990863
			-0.840000	-0.073873	-1.060000	-0.398385	-0.840000	-0.994153
			-0.880000	-0.056531	-1.100000	-0.418617	-0.880000	-0.996711
			-0.920000	-0.047583	-1.140000	-0.439471	-0.920000	-0.998538
			-0.960000	-0.029124	-1.180000	-0.460965	-0.960000	-0.999635
			-1.000000	-0.009902	-1.220000	-0.468274	-1.000000	-1.000000

## Sheet: Fig4_Sup2
Data			Concurrent Cycles			ICD						Additional input parameters
A22 concentration	asymmetry		zetaCD	zetaG		zetaCD	zetaG		alpha	zetaG		mean_gw_rate	std_gw_rate	mean_Dcd	std_Dcd	mean_DInOri	std_DInOri
0	0.041282		-1.000000	0.000000		-1.000000	-1.000000		0.000000	-0.509608		0.0088	0.000968	1.39	0.16	0.875	0.19
0	0.040667		-0.960000	-0.019363		-0.990000	-0.999958		0.005000	-0.525522		0.0088	0.000968	1.39	0.16	0.875	0.19
0	0.044707		-0.920000	-0.029267		-0.980000	-0.999833		0.010000	-0.517071		0.0088	0.000968	1.39	0.16	0.875	0.19
0.25	0.038235		-0.880000	-0.038701		-0.970000	-0.999623		0.020000	-0.482024		0.0088	0.000968	1.39	0.16	0.875	0.19
0.25	0.035689		-0.840000	-0.047977		-0.960000	-0.999331		0.030000	-0.406762		0.0088	0.000968	1.39	0.16	0.875	0.19
0.25	0.035881		-0.800000	-0.057097		-0.950000	-0.998954		0.040000	-0.332966		0.0088	0.000968	1.39	0.16	0.875	0.19
0.25	0.040202		-0.760000	-0.066455		-0.940000	-0.998494		0.050000	-0.232433		0.0088	0.000968	1.39	0.16	0.875	0.19
0.5	0.044991		-0.720000	-0.075385		-0.930000	-0.997950		0.075000	-0.130825		0.0088	0.000968	1.39	0.16	0.875	0.19
0.5	0.049004		-0.680000	-0.084178		-0.920000	-0.997323		0.100000	-0.016198		0.0088	0.000968	1.39	0.16	0.875	0.19
0.5	0.029888		-0.640000	-0.092835		-0.910000	-0.996611		0.150000	0.075339		0.0088	0.000968	1.39	0.16	0.875	0.19
0.5	0.035058		-0.600000	-0.101359		-0.900000	-0.995816		0.200000	0.125175
1	0.042409		-0.560000	-0.109749		-0.890000	-0.994938
1	0.036981		-0.520000	-0.118008		-0.880000	-0.993976
1	0.046807		-0.480000	-0.126136		-0.870000	-0.992930
			-0.440000	-0.142007		-0.860000	-0.991800
			-0.400000	-0.149751		-0.850000	-0.990587
			-0.360000	-0.157370		-0.840000	-0.989290
			-0.320000	-0.164865		-0.830000	-0.987910
			-0.280000	-0.172237		-0.820000	-0.986445
			-0.240000	-0.173648		-0.810000	-0.984898
			-0.200000	-0.171906		-0.800000	-0.983266
			-0.160000	-0.169298		-0.790000	-0.981551
			-0.120000	-0.163796		-0.780000	-0.979752
			-0.080000	-0.159089		-0.770000	-0.977869
			-0.040000	-0.153567		-0.760000	-0.975903
			-0.000000	-0.143787		-0.750000	-0.973853
			0.040000	-0.136289		-0.740000	-0.971720
			0.080000	-0.123605		-0.730000	-0.969502
			0.120000	-0.114211		-0.720000	-0.967201
			0.160000	-0.098744		-0.710000	-0.964817
			0.200000	-0.081661		-0.700000	-0.962348
			0.240000	-0.069394		-0.690000	-0.959797
			0.280000	-0.049705		-0.680000	-0.957161
			0.320000	-0.028502		-0.670000	-0.954442
			0.360000	-0.005821		-0.660000	-0.951639
			0.400000	0.010103		-0.650000	-0.948752
			0.440000	0.035170		-0.640000	-0.945782
			0.480000	0.061624		-0.630000	-0.942728
			0.520000	0.089433		-0.620000	-0.939590
			0.560000	0.118565		-0.610000	-0.936369
			0.600000	0.148991		-0.600000	-0.933064
			0.640000	0.180682		-0.590000	-0.929675
			0.640000	-0.380429		-0.580000	-0.926203
			0.600000	-0.375672		-0.570000	-0.922647
			0.560000	-0.370564		-0.560000	-0.919007
			0.520000	-0.365099		-0.550000	-0.915284
			0.480000	-0.359272		-0.540000	-0.911477
			0.440000	-0.353076		-0.530000	-0.907586
			0.400000	-0.346505		-0.520000	-0.903612
			0.360000	-0.343077		-0.510000	-0.899554
			0.320000	-0.335932		-0.500000	-0.895412
			0.280000	-0.328396		-0.490000	-0.891187
			0.240000	-0.320462		-0.480000	-0.886878
			0.200000	-0.316344		-0.470000	-0.882485
			0.160000	-0.307800		-0.460000	-0.878009
			0.120000	-0.298840		-0.450000	-0.873449
			0.080000	-0.294203		-0.440000	-0.868805
			0.040000	-0.284606		-0.430000	-0.864078
			-0.000000	-0.278005		-0.420000	-0.859267
			-0.040000	-0.273803		-0.410000	-0.854372
			-0.080000	-0.270339		-0.400000	-0.849394
			-0.120000	-0.264125		-0.390000	-0.844332
			-0.160000	-0.260860		-0.380000	-0.839186
			-0.200000	-0.258342		-0.370000	-0.833957
			-0.240000	-0.253489		-0.360000	-0.828644
			-0.280000	-0.247315		-0.350000	-0.823247
			-0.320000	-0.242449		-0.340000	-0.817767
			-0.360000	-0.233995		-0.330000	-0.812203
			-0.400000	-0.227574		-0.320000	-0.806555
			-0.440000	-0.216737		-0.310000	-0.800824
			-0.480000	-0.208692		-0.300000	-0.795009
			-0.520000	-0.199975		-0.290000	-0.789110
			-0.560000	-0.185616		-0.280000	-0.783127
			-0.600000	-0.175168		-0.270000	-0.777061
			-0.640000	-0.164005		-0.260000	-0.770912
			-0.680000	-0.145889		-0.250000	-0.764678
			-0.720000	-0.132877		-0.240000	-0.758361
			-0.760000	-0.119102		-0.230000	-0.751960
			-0.800000	-0.104548		-0.220000	-0.745476
			-0.840000	-0.089200		-0.210000	-0.738908
			-0.880000	-0.073043		-0.200000	-0.732256
			-0.920000	-0.056061		-0.190000	-0.725521
			-0.960000	-0.029059		-0.180000	-0.718701
			-1.000000	-0.009934		-0.170000	-0.711799
						-0.160000	-0.704812
						-0.150000	-0.697742
						-0.140000	-0.690588
						-0.130000	-0.683351
						-0.120000	-0.676030
						-0.110000	-0.668625
						-0.100000	-0.661137
						-0.090000	-0.653564
						-0.080000	-0.645909
						-0.070000	-0.638169
						-0.060000	-0.630346
						-0.050000	-0.622439
						-0.040000	-0.614449
						-0.030000	-0.606374
						-0.020000	-0.598217
						-0.010000	-0.589975
						0.000000	-0.581650
						0.010000	-0.573241
						0.020000	-0.564749
						0.030000	-0.556172
						0.040000	-0.547513
						0.050000	-0.538769
						0.060000	-0.529942
						0.070000	-0.521031
						0.080000	-0.512037
						0.090000	-0.502958
						0.100000	-0.493796
						0.110000	-0.484551
						0.120000	-0.475222
						0.130000	-0.465809
						0.140000	-0.456312
						0.150000	-0.446732
						0.160000	-0.437068
						0.170000	-0.427321
						0.180000	-0.417489
						0.190000	-0.407575
						0.200000	-0.397576
						0.210000	-0.387494
						0.220000	-0.377328
						0.230000	-0.367078
						0.240000	-0.356745
						0.250000	-0.346328
						0.260000	-0.335828
						0.270000	-0.325243
						0.280000	-0.314575
						0.290000	-0.303824
						0.300000	-0.292989
						0.310000	-0.282070
						0.320000	-0.271067
						0.330000	-0.259981
						0.340000	-0.248811
						0.350000	-0.237557
						0.360000	-0.226220
						0.370000	-0.214799
						0.380000	-0.203294
						0.390000	-0.191706
						0.400000	-0.180034
						0.410000	-0.168278
						0.420000	-0.156439
						0.430000	-0.144516
						0.440000	-0.132509
						0.450000	-0.120419
						0.460000	-0.108245
						0.470000	-0.095987
						0.480000	-0.083646
						0.490000	-0.071221
						0.500000	-0.058712
						0.510000	-0.046120
						0.520000	-0.033444
						0.530000	-0.020684
						0.540000	-0.007841
						0.550000	0.005086
						0.560000	0.018097
						0.570000	0.031191
						0.580000	0.044369
						0.590000	0.057631
						0.600000	0.070976
						0.610000	0.084405
						0.620000	0.097918
						0.630000	0.111514
						0.640000	0.125194
						0.650000	0.138958
						0.660000	0.152805
						0.670000	0.166736
						0.680000	0.180751
						0.690000	0.194849
						0.700000	0.209031
						0.710000	0.223297
						0.720000	0.237647
						0.730000	0.252080
						0.740000	0.266596
						0.750000	0.281197
						0.760000	0.295881
						0.770000	0.310649
						0.780000	0.325500
						0.790000	0.340435
						0.800000	0.355454
						0.810000	0.370556
						0.820000	0.385743
						0.830000	0.401012
						0.840000	0.416366
						0.850000	0.431803
						0.860000	0.447324
						0.870000	0.462928
						0.880000	0.478616
						0.890000	0.494388
						0.900000	0.510243
						0.910000	0.526183
						0.920000	0.542205
						0.930000	0.558312
						0.940000	0.574502
						0.950000	0.590776
						0.960000	0.607133
						0.970000	0.623575
						0.980000	0.640099
						0.990000	0.656708
						1.000000	0.673400
						1.000000	-0.762200
						0.990000	-0.764572
						0.980000	-0.766932
						0.970000	-0.769280
						0.960000	-0.771617
						0.950000	-0.773941
						0.940000	-0.776254
						0.930000	-0.778555
						0.920000	-0.780844
						0.910000	-0.783120
						0.900000	-0.785385
						0.890000	-0.787639
						0.880000	-0.789880
						0.870000	-0.792109
						0.860000	-0.794327
						0.850000	-0.796532
						0.840000	-0.798726
						0.830000	-0.800908
						0.820000	-0.803078
						0.810000	-0.805236
						0.800000	-0.807382
						0.790000	-0.809516
						0.780000	-0.811639
						0.770000	-0.813749
						0.760000	-0.815848
						0.750000	-0.817934
						0.740000	-0.820009
						0.730000	-0.822072
						0.720000	-0.824123
						0.710000	-0.826162
						0.700000	-0.828190
						0.690000	-0.830205
						0.680000	-0.832208
						0.670000	-0.834200
						0.660000	-0.836180
						0.650000	-0.838147
						0.640000	-0.840103
						0.630000	-0.842047
						0.620000	-0.843979
						0.610000	-0.845900
						0.600000	-0.847808
						0.590000	-0.849704
						0.580000	-0.851589
						0.570000	-0.853462
						0.560000	-0.855322
						0.550000	-0.857171
						0.540000	-0.859008
						0.530000	-0.860833
						0.520000	-0.862647
						0.510000	-0.864448
						0.500000	-0.866237
						0.490000	-0.868015
						0.480000	-0.869781
						0.470000	-0.871534
						0.460000	-0.873276
						0.450000	-0.875006
						0.440000	-0.876724
						0.430000	-0.878431
						0.420000	-0.880125
						0.410000	-0.881807
						0.400000	-0.883478
						0.390000	-0.885137
						0.380000	-0.886783
						0.370000	-0.888418
						0.360000	-0.890041
						0.350000	-0.891652
						0.340000	-0.893252
						0.330000	-0.894839
						0.320000	-0.896414
						0.310000	-0.897978
						0.300000	-0.899529
						0.290000	-0.901069
						0.280000	-0.902597
						0.270000	-0.904113
						0.260000	-0.905617
						0.250000	-0.907109
						0.240000	-0.908590
						0.230000	-0.910058
						0.220000	-0.911515
						0.210000	-0.912959
						0.200000	-0.914392
						0.190000	-0.915813
						0.180000	-0.917222
						0.170000	-0.918619
						0.160000	-0.920004
						0.150000	-0.921377
						0.140000	-0.922739
						0.130000	-0.924088
						0.120000	-0.925426
						0.110000	-0.926752
						0.100000	-0.928065
						0.090000	-0.929367
						0.080000	-0.930658
						0.070000	-0.931936
						0.060000	-0.933202
						0.050000	-0.934456
						0.040000	-0.935699
						0.030000	-0.936929
						0.020000	-0.938148
						0.010000	-0.939355
						0.000000	-0.940550
						-0.010000	-0.941733
						-0.020000	-0.942904
						-0.030000	-0.944063
						-0.040000	-0.945211
						-0.050000	-0.946346
						-0.060000	-0.947470
						-0.070000	-0.948582
						-0.080000	-0.949682
						-0.090000	-0.950769
						-0.100000	-0.951846
						-0.110000	-0.952910
						-0.120000	-0.953962
						-0.130000	-0.955002
						-0.140000	-0.956031
						-0.150000	-0.957047
						-0.160000	-0.958052
						-0.170000	-0.959045
						-0.180000	-0.960026
						-0.190000	-0.960995
						-0.200000	-0.961952
						-0.210000	-0.962897
						-0.220000	-0.963831
						-0.230000	-0.964752
						-0.240000	-0.965662
						-0.250000	-0.966559
						-0.260000	-0.967445
						-0.270000	-0.968319
						-0.280000	-0.969181
						-0.290000	-0.970031
						-0.300000	-0.970869
						-0.310000	-0.971696
						-0.320000	-0.972510
						-0.330000	-0.973313
						-0.340000	-0.974104
						-0.350000	-0.974882
						-0.360000	-0.975649
						-0.370000	-0.976404
						-0.380000	-0.977147
						-0.390000	-0.977879
						-0.400000	-0.978598
						-0.410000	-0.979305
						-0.420000	-0.980001
						-0.430000	-0.980685
						-0.440000	-0.981356
						-0.450000	-0.982016
						-0.460000	-0.982664
						-0.470000	-0.983300
						-0.480000	-0.983925
						-0.490000	-0.984537
						-0.500000	-0.985137
						-0.510000	-0.985726
						-0.520000	-0.986303
						-0.530000	-0.986867
						-0.540000	-0.987420
						-0.550000	-0.987961
						-0.560000	-0.988490
						-0.570000	-0.989008
						-0.580000	-0.989513
						-0.590000	-0.990006
						-0.600000	-0.990488
						-0.610000	-0.990958
						-0.620000	-0.991415
						-0.630000	-0.991861
						-0.640000	-0.992295
						-0.650000	-0.992717
						-0.660000	-0.993128
						-0.670000	-0.993526
						-0.680000	-0.993912
						-0.690000	-0.994287
						-0.700000	-0.994649
						-0.710000	-0.995000
						-0.720000	-0.995339
						-0.730000	-0.995666
						-0.740000	-0.995981
						-0.750000	-0.996284
						-0.760000	-0.996576
						-0.770000	-0.996855
						-0.780000	-0.997123
						-0.790000	-0.997378
						-0.800000	-0.997622
						-0.810000	-0.997854
						-0.820000	-0.998074
						-0.830000	-0.998282
						-0.840000	-0.998478
						-0.850000	-0.998662
						-0.860000	-0.998835
						-0.870000	-0.998995
						-0.880000	-0.999144
						-0.890000	-0.999281
						-0.900000	-0.999405
						-0.910000	-0.999518
						-0.920000	-0.999620
						-0.930000	-0.999709
						-0.940000	-0.999786
						-0.950000	-0.999851
						-0.960000	-0.999905
						-0.970000	-0.999946
						-0.980000	-0.999976
						-0.990000	-0.999994
						-1.000000	-1.000000

## Sheet: Fig4_Sup3
						concurrent cycles model			ICD model
cond	zetaG	zetaI	zetaCD	p_H		zetaCD	zetaG		zetaCD	zetaG
UntrA	-0.013924	0.090201	-0.042252	0.506642		-1.000000	0.000000		-1.000000	-1.000000
UntrA	0.019267	-0.024671	-0.035511	0.539485		-0.960000	-0.013057		-0.990000	-0.999958
UntrA	-0.142380	-0.104620	-0.232060	0.660349		-0.920000	-0.017586		-0.980000	-0.999833
UntrB	-0.155770	0.051744	-0.103900	0.48189		-0.880000	-0.029005		-0.970000	-0.999623
UntrB	-0.229910	-0.269470	-0.088005	0.47997		-0.840000	-0.034720		-0.960000	-0.999331
UntrB	-0.244740	-0.263200	-0.138980	0.516152		-0.800000	-0.043989		-0.950000	-0.998954
Witz	-0.079600	-0.206600	-0.057700	0.488102		-0.760000	-0.049591		-0.940000	-0.998494
Witz	-0.142400	-0.033200	-0.360600	0.702222		-0.720000	-0.055083		-0.930000	-0.997950
Witz	-0.250400	-0.163800	-0.390700	0.72196		-0.680000	-0.064020		-0.920000	-0.997323
Si	-0.332500	-0.060000	-0.672400	0.578305		-0.640000	-0.069401		-0.910000	-0.996611
Si	-0.144300	-0.066000	0.029200	0.830738		-0.600000	-0.069077		-0.900000	-0.995816
Si	-0.097000	-0.026500	-0.044700	0.737543		-0.560000	-0.086534		-0.890000	-0.994938
Si	-0.125600	-0.014700	-0.176500	0.527503		-0.520000	-0.091699		-0.880000	-0.993976
Si	-0.051000	-0.322400	0.067100	0.778555		-0.480000	-0.101491		-0.870000	-0.992930
Si	-0.188500	-0.124400	-0.158100	0.815138		-0.440000	-0.106549		-0.860000	-0.991800
						-0.400000	-0.111500		-0.850000	-0.990587
						-0.360000	-0.119412		-0.840000	-0.989290
						-0.320000	-0.124258		-0.830000	-0.987910
						-0.280000	-0.116986		-0.820000	-0.986445
						-0.240000	-0.132712		-0.810000	-0.984898
						-0.200000	-0.137352		-0.800000	-0.983266
						-0.160000	-0.128326		-0.790000	-0.981551
						-0.120000	-0.137709		-0.780000	-0.979752
						-0.080000	-0.142146		-0.770000	-0.977869
						-0.040000	-0.135544		-0.760000	-0.975903
						0.000000	-0.135876		-0.750000	-0.973853
						0.040000	-0.132849		-0.740000	-0.971720
						0.080000	-0.121884		-0.730000	-0.969502
						0.120000	-0.110902		-0.720000	-0.967201
						0.160000	-0.097523		-0.710000	-0.964817
						0.200000	-0.082743		-0.700000	-0.962348
						0.240000	-0.065601		-0.690000	-0.959797
						0.280000	-0.047016		-0.680000	-0.957161
						0.320000	-0.028009		-0.670000	-0.954442
						0.360000	-0.005821		-0.660000	-0.951639
						0.360000	-0.343077		-0.650000	-0.948752
						0.320000	-0.335802		-0.640000	-0.945782
						0.280000	-0.328842		-0.630000	-0.942728
						0.240000	-0.321787		-0.620000	-0.939590
						0.200000	-0.315404		-0.610000	-0.936369
						0.160000	-0.309852		-0.600000	-0.933064
						0.120000	-0.304693		-0.590000	-0.929675
						0.080000	-0.299441		-0.580000	-0.926203
						0.040000	-0.294883		-0.570000	-0.922647
						0.000000	-0.289966		-0.560000	-0.919007
						-0.040000	-0.284510		-0.550000	-0.915284
						-0.080000	-0.278927		-0.540000	-0.911477
						-0.120000	-0.272579		-0.530000	-0.907586
						-0.160000	-0.266274		-0.520000	-0.903612
						-0.200000	-0.259850		-0.510000	-0.899554
						-0.240000	-0.253669		-0.500000	-0.895412
						-0.280000	-0.247118		-0.490000	-0.891187
						-0.320000	-0.240964		-0.480000	-0.886878
						-0.360000	-0.233614		-0.470000	-0.882485
						-0.400000	-0.225889		-0.460000	-0.878009
						-0.440000	-0.217395		-0.450000	-0.873449
						-0.480000	-0.207719		-0.440000	-0.868805
						-0.520000	-0.197238		-0.430000	-0.864078
						-0.560000	-0.186691		-0.420000	-0.859267
						-0.600000	-0.174131		-0.410000	-0.854372
						-0.640000	-0.160711		-0.400000	-0.849394
						-0.680000	-0.147408		-0.390000	-0.844332
						-0.720000	-0.133284		-0.380000	-0.839186
						-0.760000	-0.118323		-0.370000	-0.833957
						-0.800000	-0.103754		-0.360000	-0.828644
						-0.840000	-0.088391		-0.350000	-0.823247
						-0.880000	-0.070398		-0.340000	-0.817767
						-0.920000	-0.051476		-0.330000	-0.812203
						-0.960000	-0.031712		-0.320000	-0.806555
						-1.000000	-0.009937		-0.310000	-0.800824
									-0.300000	-0.795009
									-0.290000	-0.789110
									-0.280000	-0.783127
									-0.270000	-0.777061
									-0.260000	-0.770912
									-0.250000	-0.764678
									-0.240000	-0.758361
									-0.230000	-0.751960
									-0.220000	-0.745476
									-0.210000	-0.738908
									-0.200000	-0.732256
									-0.190000	-0.725521
									-0.180000	-0.718701
									-0.170000	-0.711799
									-0.160000	-0.704812
									-0.150000	-0.697742
									-0.140000	-0.690588
									-0.130000	-0.683351
									-0.120000	-0.676030
									-0.110000	-0.668625
									-0.100000	-0.661137
									-0.090000	-0.653564
									-0.080000	-0.645909
									-0.070000	-0.638169
									-0.060000	-0.630346
									-0.050000	-0.622439
									-0.040000	-0.614449
									-0.030000	-0.606374
									-0.020000	-0.598217
									-0.010000	-0.589975
									0.000000	-0.581650
									0.010000	-0.573241
									0.020000	-0.564749
									0.030000	-0.556172
									0.040000	-0.547513
									0.050000	-0.538769
									0.060000	-0.529942
									0.070000	-0.521031
									0.080000	-0.512037
									0.090000	-0.502958
									0.100000	-0.493796
									0.110000	-0.484551
									0.120000	-0.475222
									0.130000	-0.465809
									0.140000	-0.456312
									0.150000	-0.446732
									0.160000	-0.437068
									0.170000	-0.427321
									0.180000	-0.417489
									0.190000	-0.407575
									0.200000	-0.397576
									0.210000	-0.387494
									0.220000	-0.377328
									0.230000	-0.367078
									0.240000	-0.356745
									0.250000	-0.346328
									0.260000	-0.335828
									0.270000	-0.325243
									0.280000	-0.314575
									0.290000	-0.303824
									0.300000	-0.292989
									0.310000	-0.282070
									0.320000	-0.271067
									0.330000	-0.259981
									0.340000	-0.248811
									0.350000	-0.237557
									0.360000	-0.226220
									0.370000	-0.214799
									0.380000	-0.203294
									0.390000	-0.191706
									0.400000	-0.180034
									0.410000	-0.168278
									0.420000	-0.156439
									0.430000	-0.144516
									0.440000	-0.132509
									0.450000	-0.120419
									0.460000	-0.108245
									0.470000	-0.095987
									0.480000	-0.083646
									0.490000	-0.071221
									0.500000	-0.058712
									0.510000	-0.046120
									0.520000	-0.033444
									0.530000	-0.020684
									0.540000	-0.007841
									0.550000	0.005086
									0.560000	0.018097
									0.570000	0.031191
									0.580000	0.044369
									0.590000	0.057631
									0.600000	0.070976
									0.610000	0.084405
									0.620000	0.097918
									0.630000	0.111514
									0.640000	0.125194
									0.650000	0.138958
									0.660000	0.152805
									0.670000	0.166736
									0.680000	0.180751
									0.690000	0.194849
									0.700000	0.209031
									0.710000	0.223297
									0.720000	0.237647
									0.730000	0.252080
									0.740000	0.266596
									0.750000	0.281197
									0.760000	0.295881
									0.770000	0.310649
									0.780000	0.325500
									0.790000	0.340435
									0.800000	0.355454
									0.810000	0.370556
									0.820000	0.385743
									0.830000	0.401012
									0.840000	0.416366
									0.850000	0.431803
									0.860000	0.447324
									0.870000	0.462928
									0.880000	0.478616
									0.890000	0.494388
									0.900000	0.510243
									0.910000	0.526183
									0.920000	0.542205
									0.930000	0.558312
									0.940000	0.574502
									0.950000	0.590776
									0.960000	0.607133
									0.970000	0.623575
									0.980000	0.640099
									0.990000	0.656708
									1.000000	0.673400
									1.000000	-0.884100
									0.990000	-0.885256
									0.980000	-0.886406
									0.970000	-0.887551
									0.960000	-0.888690
									0.950000	-0.889823
									0.940000	-0.890950
									0.930000	-0.892071
									0.920000	-0.893187
									0.910000	-0.894296
									0.900000	-0.895400
									0.890000	-0.896498
									0.880000	-0.897591
									0.870000	-0.898677
									0.860000	-0.899758
									0.850000	-0.900833
									0.840000	-0.901902
									0.830000	-0.902966
									0.820000	-0.904023
									0.810000	-0.905075
									0.800000	-0.906121
									0.790000	-0.907161
									0.780000	-0.908196
									0.770000	-0.909224
									0.760000	-0.910247
									0.750000	-0.911264
									0.740000	-0.912275
									0.730000	-0.913281
									0.720000	-0.914280
									0.710000	-0.915274
									0.700000	-0.916262
									0.690000	-0.917245
									0.680000	-0.918221
									0.670000	-0.919192
									0.660000	-0.920156
									0.650000	-0.921116
									0.640000	-0.922069
									0.630000	-0.923016
									0.620000	-0.923958
									0.610000	-0.924894
									0.600000	-0.925824
									0.590000	-0.926748
									0.580000	-0.927667
									0.570000	-0.928580
									0.560000	-0.929486
									0.550000	-0.930388
									0.540000	-0.931283
									0.530000	-0.932172
									0.520000	-0.933056
									0.510000	-0.933934
									0.500000	-0.934806
									0.490000	-0.935673
									0.480000	-0.936533
									0.470000	-0.937388
									0.460000	-0.938237
									0.450000	-0.939080
									0.440000	-0.939917
									0.430000	-0.940749
									0.420000	-0.941575
									0.410000	-0.942395
									0.400000	-0.943209
									0.390000	-0.944017
									0.380000	-0.944820
									0.370000	-0.945617
									0.360000	-0.946408
									0.350000	-0.947193
									0.340000	-0.947972
									0.330000	-0.948746
									0.320000	-0.949514
									0.310000	-0.950276
									0.300000	-0.951032
									0.290000	-0.951783
									0.280000	-0.952527
									0.270000	-0.953266
									0.260000	-0.953999
									0.250000	-0.954727
									0.240000	-0.955448
									0.230000	-0.956164
									0.220000	-0.956874
									0.210000	-0.957578
									0.200000	-0.958276
									0.190000	-0.958969
									0.180000	-0.959655
									0.170000	-0.960336
									0.160000	-0.961011
									0.150000	-0.961681
									0.140000	-0.962344
									0.130000	-0.963002
									0.120000	-0.963654
									0.110000	-0.964300
									0.100000	-0.964940
									0.090000	-0.965575
									0.080000	-0.966204
									0.070000	-0.966827
									0.060000	-0.967444
									0.050000	-0.968055
									0.040000	-0.968661
									0.030000	-0.969260
									0.020000	-0.969854
									0.010000	-0.970443
									0.000000	-0.971025
									-0.010000	-0.971602
									-0.020000	-0.972172
									-0.030000	-0.972737
									-0.040000	-0.973297
									-0.050000	-0.973850
									-0.060000	-0.974398
									-0.070000	-0.974940
									-0.080000	-0.975476
									-0.090000	-0.976006
									-0.100000	-0.976530
									-0.110000	-0.977049
									-0.120000	-0.977562
									-0.130000	-0.978069
									-0.140000	-0.978570
									-0.150000	-0.979066
									-0.160000	-0.979555
									-0.170000	-0.980039
									-0.180000	-0.980517
									-0.190000	-0.980990
									-0.200000	-0.981456
									-0.210000	-0.981917
									-0.220000	-0.982372
									-0.230000	-0.982821
									-0.240000	-0.983264
									-0.250000	-0.983702
									-0.260000	-0.984133
									-0.270000	-0.984559
									-0.280000	-0.984979
									-0.290000	-0.985394
									-0.300000	-0.985802
									-0.310000	-0.986205
									-0.320000	-0.986602
									-0.330000	-0.986993
									-0.340000	-0.987378
									-0.350000	-0.987758
									-0.360000	-0.988132
									-0.370000	-0.988500
									-0.380000	-0.988862
									-0.390000	-0.989218
									-0.400000	-0.989569
									-0.410000	-0.989914
									-0.420000	-0.990253
									-0.430000	-0.990586
									-0.440000	-0.990913
									-0.450000	-0.991235
									-0.460000	-0.991551
									-0.470000	-0.991861
									-0.480000	-0.992165
									-0.490000	-0.992464
									-0.500000	-0.992756
									-0.510000	-0.993043
									-0.520000	-0.993324
									-0.530000	-0.993599
									-0.540000	-0.993869
									-0.550000	-0.994133
									-0.560000	-0.994390
									-0.570000	-0.994643
									-0.580000	-0.994889
									-0.590000	-0.995129
									-0.600000	-0.995364
									-0.610000	-0.995593
									-0.620000	-0.995816
									-0.630000	-0.996033
									-0.640000	-0.996245
									-0.650000	-0.996451
									-0.660000	-0.996650
									-0.670000	-0.996845
									-0.680000	-0.997033
									-0.690000	-0.997216
									-0.700000	-0.997392
									-0.710000	-0.997563
									-0.720000	-0.997728
									-0.730000	-0.997888
									-0.740000	-0.998041
									-0.750000	-0.998189
									-0.760000	-0.998331
									-0.770000	-0.998467
									-0.780000	-0.998598
									-0.790000	-0.998722
									-0.800000	-0.998841
									-0.810000	-0.998954
									-0.820000	-0.999061
									-0.830000	-0.999163
									-0.840000	-0.999258
									-0.850000	-0.999348
									-0.860000	-0.999432
									-0.870000	-0.999510
									-0.880000	-0.999583
									-0.890000	-0.999649
									-0.900000	-0.999710
									-0.910000	-0.999765
									-0.920000	-0.999815
									-0.930000	-0.999858
									-0.940000	-0.999896
									-0.950000	-0.999928
									-0.960000	-0.999954
									-0.970000	-0.999974
									-0.980000	-0.999988
									-0.990000	-0.999997
									-1.000000	-1.000000

## Sheet: Fig4_Sup4A
												Simulation parameters CC
Theory					Simulation							mean_gw_rate	std_gw_rate	mean_tauCD	std_tauCD	mean_DI	std_DI	mean_DH	std_DH
x_CC_nOri1	y_CC_nOri1	x_CC_nOri2	y_CC_nOri2		x_CC_nOri1	y_CC_nOri1	x_CC_nOri2	y_CC_nOri2	x_ICD	y_ICD		0.005	0.0005	70	0.141421	1	0.15	0.619931	0.0619931
-1.000000	0.000000	-1.000000	0.000000		-0.830023	-0.051884	-0.872882	-0.015954	-0.005868	-0.168419		0.005	0.0005	70	0.141421	1	0.14	0.638811	0.0638811
-0.979641	-0.009881	-0.969322	-0.009931		-0.725297	-0.148049	-0.812736	-0.018133	-0.022579	-0.217541		0.005	0.0005	70	0.155563	1	0.13	0.658265	0.0658265
-0.959417	-0.019525	-0.938847	-0.019726		-0.625738	-0.137760	-0.559877	-0.100923	0.006226	-0.375096		0.005	0.0005	70	0.169706	1	0.12	0.678313	0.0678313
-0.939326	-0.028935	-0.908573	-0.029386		-0.436551	-0.127660	-0.294544	-0.128294	0.005510	-0.401574		0.005	0.0005	70	0.183848	1	0.115	0.69897	0.069897
-0.919367	-0.038113	-0.878499	-0.038911		-0.330782	-0.159439	0.057143	-0.223495	0.014280	-0.511249		0.005	0.0005	70	0.19799	1	0.11	0.720257	0.0720257
-0.899540	-0.047061	-0.848622	-0.048305		-0.217472	-0.205841	0.256993	-0.289206	-0.021047	-0.497677		0.005	0.0005	70	0.212132	1	0.1	0.742192	0.0742192
-0.879841	-0.055782	-0.818940	-0.057566		-0.116421	-0.256031	0.538926	-0.328924	0.009762	-0.595913		0.005	0.0005	70	0.240416	1	0.1	0.764795	0.0764795
-0.860272	-0.064278	-0.789451	-0.066699		-0.030784	-0.300992	0.656495	-0.430499	-0.034296	-0.670241		0.005	0.0005	70	0.268701	1	0.1	0.788087	0.0788087
-0.840829	-0.072550	-0.760154	-0.075702		0.070376	-0.321358	0.984034	-0.405862	0.018230	-0.756297		0.005	0.0005	70	0.296985	1	0.1	0.812088	0.0812088
-0.821512	-0.080602	-0.731046	-0.084578		0.190218	-0.316084	0.838120	-0.541715	-0.021662	-0.763311
-0.802320	-0.088435	-0.702126	-0.093327
-0.783251	-0.096051	-0.673393	-0.101952
-0.764304	-0.103452	-0.644843	-0.110453									Simulation parameters ICD
-0.745479	-0.110642	-0.616476	-0.118832									mean_gw_rate	std_gw_rate	mean_DCD	std_DCD	mean_DI	std_DI	alpha_asym
-0.726773	-0.117620	-0.588289	-0.127088									0.005	0.0005	0.2	0.05	1	0.105	0
-0.708186	-0.124391	-0.560282	-0.135225									0.005	0.0005	0.25	0.05	1	0.09	0
-0.689717	-0.130955	-0.532452	-0.143243									0.005	0.0005	0.3	0.05	1	0.08	0
-0.671364	-0.137314	-0.504797	-0.151142									0.005	0.0005	0.35	0.05	1	0.07	0
-0.653127	-0.143471	-0.477316	-0.158925									0.005	0.0005	0.4	0.05	1	0.06	0
-0.635004	-0.149427	-0.450008	-0.166592									0.005	0.0005	0.45	0.05	1	0.06	0
-0.616994	-0.155184	-0.422870	-0.174144									0.005	0.0005	0.5	0.05	1	0.06	0
-0.599097	-0.160744	-0.395901	-0.181583									0.005	0.0005	0.55	0.05	1	0.06	0
-0.581311	-0.166109	-0.369100	-0.188909									0.005	0.0005	0.6	0.05	1	0.06	0
-0.563634	-0.171281	-0.342465	-0.196123									0.005	0.0005	0.65	0.05	1	0.06	0
-0.546067	-0.176261	-0.315994	-0.203227
-0.528608	-0.181052	-0.289686	-0.210222
-0.511257	-0.185655	-0.263540	-0.217108
-0.494011	-0.190071	-0.237553	-0.223886
-0.476870	-0.194303	-0.211725	-0.230558
-0.459834	-0.198352	-0.186054	-0.237125
-0.442901	-0.202219	-0.160538	-0.243587
-0.426070	-0.205907	-0.135177	-0.249945
-0.409341	-0.209417	-0.109968	-0.256201
-0.392712	-0.212751	-0.084911	-0.262355
-0.376182	-0.215910	-0.060004	-0.268408
-0.359752	-0.218896	-0.035245	-0.274362
-0.343419	-0.221710	-0.010634	-0.280216
-0.327183	-0.224354	0.013831	-0.285972
-0.311043	-0.226829	0.038151	-0.291631
-0.294998	-0.229138	0.062328	-0.297193
-0.279048	-0.231280	0.086362	-0.302660
-0.263191	-0.233259	0.110256	-0.308032
-0.247428	-0.235074	0.134010	-0.313310
-0.231755	-0.236728	0.157625	-0.318495
-0.216174	-0.238223	0.181103	-0.323588
-0.200684	-0.239559	0.204445	-0.328589
-0.185283	-0.240737	0.227652	-0.333500
-0.169970	-0.241760	0.250725	-0.338321
-0.154746	-0.242629	0.273666	-0.343053
-0.139609	-0.243344	0.296475	-0.347696
-0.124559	-0.243907	0.319154	-0.352252
-0.109594	-0.244320	0.341704	-0.356721
-0.094714	-0.244584	0.364125	-0.361103
-0.079918	-0.244700	0.386420	-0.365401
-0.065207	-0.244669	0.408588	-0.369614
-0.050578	-0.244492	0.430632	-0.373743
-0.036031	-0.244172	0.452552	-0.377788
-0.021565	-0.243708	0.474349	-0.381751
-0.007181	-0.243102	0.496024	-0.385633
0.007123	-0.242356	0.517579	-0.389433
0.021348	-0.241470	0.539013	-0.393152
0.035494	-0.240446	0.560329	-0.396792
0.049562	-0.239285	0.581527	-0.400353
0.063553	-0.237988	0.602609	-0.403835
0.077466	-0.236556	0.623574	-0.407240
0.091304	-0.234990	0.644425	-0.410567
0.105065	-0.233291	0.665162	-0.413817
0.118752	-0.231461	0.685786	-0.416992
0.132365	-0.229500	0.706297	-0.420091
0.145903	-0.227409	0.726698	-0.423116
0.159368	-0.225190	0.746988	-0.426067
0.172761	-0.222844	0.767169	-0.428944
0.186082	-0.220371	0.787241	-0.431748
0.199331	-0.217774	0.807206	-0.434480
0.212510	-0.215051	0.827064	-0.437140
0.225618	-0.212205	0.846816	-0.439729
0.238657	-0.209237	0.866463	-0.442247
0.251626	-0.206148	0.886006	-0.444695
0.264527	-0.202938	0.905445	-0.447074
0.277359	-0.199608	0.924782	-0.449384
0.290124	-0.196160	0.944017	-0.451625
0.302822	-0.192595	0.963151	-0.453799
0.315454	-0.188913	0.982185	-0.455905
0.328020	-0.185115	1.001119	-0.457944
0.340520	-0.181202	1.019955	-0.459917
0.352955	-0.177175	1.038693	-0.461825
0.365326	-0.173035	1.057334	-0.463667
0.377633	-0.168783	1.075878	-0.465445
0.389876	-0.164419	1.094327	-0.467158
0.402057	-0.159945	1.112681	-0.468807
0.414175	-0.155361	1.130941	-0.470393
0.426231	-0.150669	1.149108	-0.471917
0.438225	-0.145868	1.167182	-0.473378
0.450159	-0.140961	1.185164	-0.474777
0.462032	-0.135947	1.203054	-0.476115
0.473845	-0.130828	1.220855	-0.477392
0.485598	-0.125604	1.238565	-0.478609
0.497292	-0.120276	1.256186	-0.479766
0.508927	-0.114844	1.273718	-0.480863
0.520504	-0.109311	1.291163	-0.481901
0.532023	-0.103676	1.308520	-0.482881

## Sheet: Fig4_Sup4B
						Simulations CC Q_CD =1.5
x_Q_CD=1.5	y_Q_CD=1.5	x_Q_CD=2.3	y_Q_CD=2.3			mean_gw_rate	std_gw_rate	mean_tauCD	std_tauCD	mean_DI	std_DI	mean_DH	std_DH
0.052018	0.038261	0.085151	0.076931			0.004	0.011	90	0.0141421	1.75	0.009	1.25416	0.0125416
0.052881	0.025343	0.081956	0.000268			0.004	0.022	90	0.0282843	1.75	0.018	1.25416	0.0250833
0.055721	0.003135	0.087931	0.074599			0.004	0.033	90	0.0424264	1.75	0.027	1.25416	0.0376249
0.059024	0.005898	0.086158	0.142815			0.004	0.044	90	0.0565685	1.75	0.036	1.25416	0.0501665
0.072574	0.015821	0.092181	0.120118			0.004	0.055	90	0.0707107	1.75	0.045	1.25416	0.0627082
0.086502	0.067699	0.095879	0.075460			0.004	0.066	90	0.0848528	1.75	0.054	1.25416	0.0752498
0.099686	-0.001083	0.100973	0.075851			0.004	0.077	90	0.0989949	1.75	0.063	1.25416	0.0877914
0.117730	0.027085	0.117679	0.043339			0.004	0.088	90	0.113137	1.75	0.072	1.25416	0.100333
0.141837	0.019216	0.146221	0.066504			0.004	0.099	90	0.127279	1.75	0.081	1.25416	0.112875
0.173170	0.028983	0.185318	0.105211			0.004	0.11	90	0.141421	1.75	0.09	1.25416	0.125416
						0.004	0.1375	90	0.176777	1.75	0.1125	1.25416	0.15677
						0.004	0.165	90	0.212132	1.75	0.135	1.25416	0.188124
						0.004	0.1925	90	0.247487	1.75	0.1575	1.25416	0.219479
						0.004	0.22	90	0.282843	1.75	0.18	1.25416	0.250833
						Simulations CC Q_CD =2.7
						mean_gw_rate	std_gw_rate	mean_tauCD	std_tauCD	mean_DI	std_DI	mean_DH	std_DH
						0.01	0.011	90	0.0141421	1.75	0.009	2.15215	0.0215215
						0.01	0.022	90	0.0282843	1.75	0.018	2.15215	0.0430431
						0.01	0.033	90	0.0424264	1.75	0.027	2.15215	0.0645646
						0.01	0.044	90	0.0565685	1.75	0.036	2.15215	0.0860861
						0.01	0.055	90	0.0707107	1.75	0.045	2.15215	0.107608
						0.01	0.066	90	0.0848528	1.75	0.054	2.15215	0.129129
						0.01	0.077	90	0.0989949	1.75	0.063	2.15215	0.150651
						0.01	0.088	90	0.113137	1.75	0.072	2.15215	0.172172
						0.01	0.099	90	0.127279	1.75	0.081	2.15215	0.193694
						0.01	0.11	90	0.141421	1.75	0.09	2.15215	0.215215
						0.01	0.1375	90	0.176777	1.75	0.1125	2.15215	0.269019
						0.01	0.165	90	0.212132	1.75	0.135	2.15215	0.322823
						0.01	0.1925	90	0.247487	1.75	0.1575	2.15215	0.376627
						0.01	0.22	90	0.282843	1.75	0.18	2.15215	0.430431

## Sheet: Fig4_Sup4C
						Simulations CC Q_CD =1.5
x_Q_CD=1.5	y_Q_CD=1.5	x_Q_CD=2.3	y_Q_CD=2.3			mean_gw_rate	std_gw_rate	mean_tauCD	std_tauCD	mean_DI	std_DI	mean_DH	std_DH
0.052018	0.393658	0.085151	0.314931			0.004	0.011	90	0.0141421	1.75	0.009	1.25416	0.0125416
0.052881	0.600500	0.081956	0.022385			0.004	0.022	90	0.0282843	1.75	0.018	1.25416	0.0250833
0.055721	0.933641	0.087931	0.075015			0.004	0.033	90	0.0424264	1.75	0.027	1.25416	0.0376249
0.059024	1.234557	0.086158	0.173438			0.004	0.044	90	0.0565685	1.75	0.036	1.25416	0.0501665
0.072574	1.552019	0.092181	0.126402			0.004	0.055	90	0.0707107	1.75	0.045	1.25416	0.0627082
0.086502	1.829778	0.095879	0.219471			0.004	0.066	90	0.0848528	1.75	0.054	1.25416	0.0752498
0.099686	2.193387	0.100973	0.198235			0.004	0.077	90	0.0989949	1.75	0.063	1.25416	0.0877914
0.117730	2.466771	0.117679	0.192860			0.004	0.088	90	0.113137	1.75	0.072	1.25416	0.100333
0.141837	2.710100	0.146221	0.198696			0.004	0.099	90	0.127279	1.75	0.081	1.25416	0.112875
0.173170	2.918866	0.185318	0.476542			0.004	0.11	90	0.141421	1.75	0.09	1.25416	0.125416
						0.004	0.1375	90	0.176777	1.75	0.1125	1.25416	0.15677
						0.004	0.165	90	0.212132	1.75	0.135	1.25416	0.188124
						0.004	0.1925	90	0.247487	1.75	0.1575	1.25416	0.219479
						0.004	0.22	90	0.282843	1.75	0.18	1.25416	0.250833
						Simulations CC Q_CD =2.7
						mean_gw_rate	std_gw_rate	mean_tauCD	std_tauCD	mean_DI	std_DI	mean_DH	std_DH
						0.01	0.011	90	0.0141421	1.75	0.009	2.15215	0.0215215
						0.01	0.022	90	0.0282843	1.75	0.018	2.15215	0.0430431
						0.01	0.033	90	0.0424264	1.75	0.027	2.15215	0.0645646
						0.01	0.044	90	0.0565685	1.75	0.036	2.15215	0.0860861
						0.01	0.055	90	0.0707107	1.75	0.045	2.15215	0.107608
						0.01	0.066	90	0.0848528	1.75	0.054	2.15215	0.129129
						0.01	0.077	90	0.0989949	1.75	0.063	2.15215	0.150651
						0.01	0.088	90	0.113137	1.75	0.072	2.15215	0.172172
						0.01	0.099	90	0.127279	1.75	0.081	2.15215	0.193694
						0.01	0.11	90	0.141421	1.75	0.09	2.15215	0.215215
						0.01	0.1375	90	0.176777	1.75	0.1125	2.15215	0.269019
						0.01	0.165	90	0.212132	1.75	0.135	2.15215	0.322823
						0.01	0.1925	90	0.247487	1.75	0.1575	2.15215	0.376627
						0.01	0.22	90	0.282843	1.75	0.18	2.15215	0.430431

[truncated: 1 more sheets: Fig4_Sup5]
