# Supplementary material for: Two different cell-cycle processes determine the timing of cell division in Escherichia coli
Source: eLife journal article supplement (doi:10.7554/elife.67495), 2021-10-06
Supplement: supp [file elife-67495-supp-v1.zip › elife_poa_e67495_Supplementary_file_2.csv]

ExperimentName	grandmother	mother	cell	Linit_cell	Linit_mother	Lterm_cell	Lterm_mother	Tinit_cell	Tinit_mother	Tterm_cell	Tterm_mother	Tbirth_grandmother	Tbirth_cell	Tbirth_mother	Tdivision_mother	growthrate_mother	growthrate_grandmother	Tdivision_cell	growthrate_cell	Lbirth_cell	Ldivision_cell	Width_cell
untreated-a	1483	1504	1524	1.3164	0.55525	1.7683	0.75687	1518	1362	1566	1416	1248	1500	1374	1494	0.0062974	0.0062679	1608	0.0063462	1.1809	2.4071	0.63946
untreated-a	2076	2115	2131	1.8988	0.81727	2.7398	1.2116	1092	942	1146	1002	804	1038	936	1032	0.0061501	0.0059306	1164	0.0063676	1.4414	3.1735	0.38819
untreated-a	2076	2115	2132	1.8953	0.81727	2.535	1.2116	1086	942	1140	1002	804	1038	936	1032	0.0061501	0.0059306	1164	0.0054955	1.3775	2.8577	0.40476
untreated-a	2092	2122	2147	1.7664	0.91656	2.2879	1.3362	1122	1014	1176	1068	852	1098	978	1092	0.0063532	0.0060007	1188	0.0045442	1.5732	2.4836	0.4208
untreated-a	2092	2121	2150	1.7076	0.88305	2.3496	1.1435	1134	1014	1188	1056	852	1104	978	1098	0.0064222	0.0060007	1224	0.0059212	1.5736	3.0598	0.37449
untreated-a	2092	2121	2151	1.839	0.88305	2.7383	1.1435	1146	1014	1200	1056	852	1104	978	1098	0.0064222	0.0060007	1224	0.0067621	1.511	3.1373	0.40006
untreated-a	2115	2131	2158	1.8953	0.94941	2.4747	1.3699	1206	1092	1254	1146	936	1170	1038	1164	0.0063676	0.0061501	1284	0.0061842	1.5099	3.0479	0.36833
untreated-a	2131	2158	2179	2.1555	0.94765	2.7288	1.2373	1296	1206	1326	1254	1038	1290	1170	1284	0.0061842	0.0063676	1356	0.0087656	1.577	3.2597	0.42742
untreated-a	2933	2969	3000	1.7618	0.81919	2.6036	1.2692	1506	1392	1554	1446	1254	1482	1368	1476	0.0071431	0.007413	1584	0.0070731	1.5671	3.2004	0.55666
untreated-a	2933	2969	3001	1.7011	0.81919	2.345	1.2692	1494	1392	1542	1446	1254	1482	1368	1476	0.0071431	0.007413	1566	0.0071706	1.5692	2.8512	0.56185
untreated-a	2269	2292	2334	1.7658	0.91577	2.3509	1.2079	1416	1296	1464	1344	1176	1386	1254	1380	0.0059473	0.0071572	1506	0.0062346	1.4374	3.1736	0.54908
untreated-a	2293	2326	2353	2.0257	0.88266	2.8515	1.3309	1524	1398	1584	1452	1254	1500	1368	1494	0.0073988	0.007371	1596	0.0055388	1.8284	3.1256	0.52187
untreated-a	2293	2326	2354	1.8309	0.88266	2.2947	1.3309	1506	1398	1554	1452	1254	1500	1368	1494	0.0073988	0.007371	1596	0.005437	1.6973	3.1015	0.52497
untreated-a	2326	2353	2368	1.7044	1.0129	2.4076	1.4258	1626	1524	1674	1584	1368	1602	1500	1596	0.0055388	0.0073988	1716	0.0071374	1.5736	3.3869	0.50377
untreated-a	2326	2354	2369	1.8254	0.91543	2.2056	1.1474	1650	1506	1698	1554	1368	1602	1500	1596	0.005437	0.0073988	1740	0.0051595	1.4423	2.9338	0.54197
untreated-a	2354	2369	2403	1.5674	0.91271	2.2195	1.1028	1770	1650	1830	1698	1500	1746	1602	1740	0.0051595	0.005437	1860	0.0065169	1.4494	2.8124	0.55828
untreated-a	2354	2369	2404	1.7042	0.91271	2.478	1.1028	1782	1650	1842	1698	1500	1746	1602	1740	0.0051595	0.005437	1872	0.0060646	1.5697	3.0687	0.5707
untreated-a	2369	2404	2449	1.5682	0.85212	2.2158	1.239	1902	1782	1950	1842	1602	1878	1746	1872	0.0060646	0.0051595	1986	0.0065362	1.4397	2.8819	0.51501
untreated-a	2404	2449	2474	1.5118	0.78409	2.6079	1.1079	2004	1902	2082	1950	1746	1992	1878	1986	0.0065362	0.0060646	2100	0.0070106	1.4411	2.9992	0.49332
untreated-a	2449	2474	2497	2.0342	0.75591	2.5871	1.3039	2184	2004	2214	2082	1878	2106	1992	2100	0.0070106	0.0065362	2244	0.0067385	1.3757	3.2003	0.50136
untreated-a	2474	2497	2522	1.8353	1.0171	2.7237	1.2935	2286	2184	2358	2214	1992	2250	2106	2244	0.0067385	0.0070106	2376	0.0056643	1.5706	3.1941	0.50537
untreated-a	1010	1019	1039	1.6998	0.78504	2.3532	1.044	1560	1452	1608	1476	1290	1518	1392	1512	0.0076644	0.0083975	1632	0.0068177	1.311	2.8062	0.49216
untreated-a	1010	1020	1040	1.7084	0.75264	2.2877	1.05	1548	1416	1596	1470	1290	1518	1392	1512	0.0072229	0.0083975	1626	0.0065465	1.4449	2.8621	0.4403
untreated-a	1004	1033	1055	1.7013	1.0771	2.4858	1.2085	1680	1548	1752	1590	1278	1632	1494	1626	0.0060388	0.0037186	1782	0.0050068	1.3808	2.9366	0.53173
untreated-a	1004	1033	1056	1.832	1.0771	2.2834	1.2085	1692	1548	1734	1590	1278	1632	1494	1626	0.0060388	0.0037186	1764	0.0043609	1.576	2.7784	0.58937
untreated-a	1020	1040	1058	1.5088	0.85418	2.4221	1.1438	1668	1548	1740	1596	1392	1632	1518	1626	0.0065465	0.0072229	1770	0.0064341	1.3105	2.9281	0.51904
untreated-a	1019	1039	1062	1.7042	0.84992	2.2775	1.1766	1662	1560	1716	1608	1392	1638	1518	1632	0.0068177	0.0076644	1734	0.0058637	1.4435	2.4717	0.36855
untreated-a	1019	1039	1063	1.3808	0.84992	2.0838	1.1766	1650	1560	1710	1608	1392	1638	1518	1632	0.0068177	0.0076644	1740	0.0069352	1.315	2.6085	0.35141
untreated-a	1039	1063	1079	1.769	0.69039	2.2194	1.0419	1800	1650	1848	1710	1518	1746	1638	1740	0.0069352	0.0068177	1872	0.0062759	1.1167	2.732	0.32996
untreated-a	1041	1061	1094	1.7065	0.91332	2.2255	1.2056	1824	1686	1872	1740	1518	1776	1638	1770	0.0057103	0.0069004	1914	0.0053232	1.3882	2.792	0.38933
untreated-a	1061	1094	1112	1.5074	0.85323	2.2205	1.1127	1956	1824	2010	1872	1638	1920	1776	1914	0.0053232	0.0057103	2034	0.0063894	1.2541	2.5903	0.38747
untreated-a	1094	1112	1131	1.5733	0.75372	2.158	1.1102	2082	1956	2142	2010	1776	2040	1920	2034	0.0063894	0.0053232	2172	0.0059678	1.3127	2.7295	0.32618
untreated-a	1285	1295	1304	1.5688	0.75332	2.4801	1.2064	846	756	900	810	648	834	738	828	0.0090687	0.0086296	906	0.007823	1.5744	2.672	0.46095
untreated-a	1285	1296	1305	1.6376	0.72127	2.3556	1.1702	864	750	918	816	648	840	738	834	0.007269	0.0086296	936	0.006941	1.51	2.8083	0.52695
untreated-a	1296	1305	1313	1.7016	0.81881	2.4764	1.1778	972	864	1026	918	738	942	840	936	0.006941	0.007269	1050	0.006414	1.5789	3.0043	0.49576
untreated-a	1296	1305	1314	1.5706	0.81881	2.1556	1.1778	984	864	1038	918	738	942	840	936	0.006941	0.007269	1092	0.0060632	1.3132	3.0458	0.53526
untreated-a	1305	1313	1331	1.6323	0.85081	2.5457	1.2382	1092	972	1140	1026	840	1056	942	1050	0.006414	0.006941	1158	0.0079547	1.3137	2.9261	0.49675
untreated-a	1305	1314	1337	1.7692	0.7853	2.2825	1.0778	1134	984	1182	1038	840	1098	942	1092	0.0060632	0.006941	1230	0.0053426	1.5162	2.9757	0.47655
untreated-a	1336	1349	1362	1.5732	0.7522	2.2226	1.0143	1356	1236	1410	1284	1098	1338	1218	1332	0.0063587	0.0059541	1440	0.007155	1.4425	2.9272	0.52538
untreated-a	1336	1349	1364	1.57	0.7522	2.277	1.0143	1356	1236	1416	1284	1098	1338	1218	1332	0.0063587	0.0059541	1458	0.0062529	1.3756	2.8735	0.56451
untreated-a	1349	1364	1377	1.5044	0.78499	2.2217	1.1385	1470	1356	1530	1416	1218	1464	1338	1458	0.0062529	0.0063587	1572	0.0068267	1.5078	2.9997	0.5242
untreated-a	1349	1364	1378	1.509	0.78499	2.0893	1.1385	1476	1356	1530	1416	1218	1464	1338	1458	0.0062529	0.0063587	1572	0.0070951	1.3803	2.994	0.47242
untreated-a	1364	1378	1386	1.4422	0.75449	2.2138	1.0446	1596	1476	1650	1530	1338	1578	1464	1572	0.0070951	0.0062529	1686	0.006755	1.3784	2.7258	0.46663
untreated-a	1930	1974	1993	1.6355	0.7219	2.6123	1.0745	2310	2190	2364	2244	2040	2262	2160	2256	0.0083698	0.008416	2364	0.00792	1.1165	2.6123	0.48821
untreated-a	1930	1975	2000	1.5151	0.68765	2.0222	1.0795	2298	2202	2346	2256	2040	2280	2160	2274	0.007782	0.008416	2376	0.0076385	1.2455	2.6157	0.47307
untreated-a	3075	3112	3136	1.5052	0.68828	2.2155	1.0482	954	804	1008	870	636	894	780	888	0.0058268	0.0065551	1032	0.0066756	0.99201	2.5356	0.50087
untreated-a	3075	3111	3139	1.5757	0.65978	2.0878	0.94803	972	816	1020	870	636	900	780	894	0.0060161	0.0065551	1050	0.0055243	1.1236	2.6005	0.58765
untreated-a	3112	3136	3179	1.5059	0.75259	2.1564	1.1077	1062	954	1122	1008	780	1038	894	1032	0.0066756	0.0058268	1164	0.0054984	1.444	2.8018	0.41903
untreated-a	3111	3139	3184	1.7656	0.78785	2.5486	1.0439	1116	972	1170	1020	780	1056	900	1050	0.0055243	0.0060161	1188	0.0065833	1.249	2.9856	0.48597
untreated-a	3138	3180	3222	1.5129	0.75481	2.0301	1.0431	1200	1086	1248	1134	900	1170	1044	1164	0.006686	0.0070296	1296	0.0065861	1.2484	2.8052	0.50627
untreated-a	3138	3181	3226	2.0223	0.7877	2.616	1.112	1236	1080	1278	1140	900	1182	1044	1176	0.0060649	0.0070296	1296	0.0061867	1.5093	3.0477	0.51339
untreated-a	3139	3184	3228	1.6989	0.88282	2.29	1.2743	1224	1116	1272	1170	900	1194	1056	1188	0.0065833	0.0055243	1296	0.005981	1.4401	2.6693	0.34493
untreated-a	3180	3222	3253	1.636	0.75644	2.4029	1.015	1332	1200	1386	1248	1044	1302	1170	1296	0.0065861	0.006686	1392	0.0068912	1.3749	2.5487	0.45014
untreated-a	3222	3253	3274	1.5696	0.81802	2.3455	1.2014	1434	1332	1488	1386	1170	1398	1302	1392	0.0068912	0.0065861	1494	0.0067798	1.2505	2.4184	0.41995
untreated-a	3340	3362	3375	1.769	0.88227	2.4139	1.3328	1998	1854	2046	1914	1686	1938	1800	1932	0.0065608	0.0064471	2076	0.0057208	1.2472	2.922	0.51255
untreated-a	3362	3375	3393	1.5714	0.88452	2.0909	1.207	2124	1998	2184	2046	1800	2082	1938	2076	0.0057208	0.0065608	2208	0.0053	1.1905	2.4146	0.47839
untreated-a	3361	3381	3402	2.0262	1.0463	2.6086	1.4936	2244	2052	2310	2130	1794	2154	1968	2148	0.0044659	0.0051998	2334	0.0040176	1.3775	2.9928	0.51822
untreated-a	3375	3393	3415	1.5095	0.78571	2.0958	1.0455	2286	2124	2340	2184	1938	2214	2082	2208	0.0053	0.0057208	2364	0.0059498	1.1188	2.4113	0.54559
untreated-a	4291	4313	4330	1.7654	0.91619	2.5555	1.2057	1140	1038	1206	1080	894	1110	1008	1104	0.0069612	0.0071363	1206	0.0061481	1.4416	2.5555	0.38348
untreated-a	4291	4313	4331	1.5686	0.91619	2.3567	1.2057	1128	1038	1182	1080	894	1110	1008	1104	0.0069612	0.0071363	1188	0.0079815	1.31	2.5483	0.481
untreated-a	4313	4331	4356	1.7035	0.78429	2.5488	1.1783	1236	1128	1290	1182	1008	1194	1110	1188	0.0079815	0.0069612	1302	0.0077021	1.3153	2.8697	0.47438
untreated-a	4313	4330	4359	1.9033	0.88268	2.4733	1.2778	1278	1140	1314	1206	1008	1212	1110	1206	0.0061481	0.0069612	1332	0.006782	1.2542	2.8065	0.47414
untreated-a	4330	4359	4379	1.7671	0.95164	2.548	1.2366	1374	1278	1422	1314	1110	1338	1212	1332	0.006782	0.0061481	1446	0.00739	1.4438	2.9921	0.4634
untreated-a	4330	4359	4380	2.0239	0.95164	2.5399	1.2366	1398	1278	1434	1314	1110	1338	1212	1332	0.006782	0.0061481	1458	0.006862	1.3135	3.1081	0.49056
untreated-a	4359	4379	4396	1.8369	0.88357	2.4796	1.274	1482	1374	1524	1422	1212	1452	1338	1446	0.00739	0.006782	1548	0.0070163	1.5108	3.0015	0.44201
untreated-a	4359	4379	4397	1.8324	0.88357	2.3496	1.274	1482	1374	1524	1422	1212	1452	1338	1446	0.00739	0.006782	1548	0.0067413	1.4479	2.7958	0.48628
untreated-a	4359	4380	4401	1.5717	1.0119	2.2139	1.2699	1464	1398	1518	1434	1212	1464	1338	1458	0.006862	0.006782	1548	0.0069883	1.5717	2.7922	0.45311
untreated-a	4379	4396	4417	1.6442	0.91844	2.4883	1.2398	1578	1482	1638	1524	1338	1554	1452	1548	0.0070163	0.00739	1656	0.0063659	1.4412	2.8155	0.48365
untreated-a	4379	4396	4418	2.084	0.91844	2.3477	1.2398	1614	1482	1638	1524	1338	1554	1452	1548	0.0070163	0.00739	1656	0.0058944	1.4429	2.6114	0.49368
untreated-a	4396	4417	4448	1.6351	0.82212	2.218	1.2442	1698	1578	1740	1638	1452	1662	1554	1656	0.0063659	0.0070163	1782	0.0068179	1.3753	3.004	0.49098
untreated-a	4396	4417	4449	1.4435	0.82212	2.0252	1.2442	1692	1578	1746	1638	1452	1662	1554	1656	0.0063659	0.0070163	1782	0.005871	1.3169	2.6028	0.55201
untreated-a	4417	4449	4474	1.3133	0.72174	1.9609	1.0126	1806	1692	1872	1746	1554	1788	1662	1782	0.005871	0.0063659	1902	0.0058294	1.1803	2.4104	0.53651
untreated-a	4926	4957	4993	1.3149	0.78775	1.7633	1.0472	1488	1398	1542	1446	1260	1488	1362	1482	0.006198	0.0061255	1584	0.0075328	1.3149	2.608	0.41664
untreated-a	4926	4957	4995	1.3808	0.78775	1.9644	1.0472	1488	1398	1548	1446	1260	1488	1362	1482	0.006198	0.0061255	1596	0.0067526	1.3808	2.7362	0.36354
untreated-a	5406	5427	5448	1.5768	0.88312	2.1553	1.2062	1056	942	1110	990	834	1020	906	1014	0.0065092	0.0080438	1128	0.0059732	1.3147	2.6741	0.40588
untreated-a	5406	5427	5449	1.7077	0.88312	2.4785	1.2062	1050	942	1104	990	834	1020	906	1014	0.0065092	0.0080438	1122	0.0059525	1.509	2.6749	0.42905
untreated-a	6064	6079	6112	1.8986	0.98153	2.549	1.3669	1290	1182	1338	1236	1026	1254	1116	1248	0.0056268	0.0073392	1356	0.0067677	1.5006	3.0583	0.43072
untreated-a	6064	6079	6113	1.8345	0.98153	2.7215	1.3669	1302	1182	1350	1236	1026	1254	1116	1248	0.0056268	0.0073392	1362	0.0070555	1.4386	2.9817	0.48379
untreated-a	188	200	214	1.6373	0.75236	2.3427	1.1389	1362	1260	1416	1308	1128	1350	1230	1344	0.0079236	0.0085596	1428	0.007194	1.5119	2.5434	0.57035
untreated-a	188	200	215	1.5708	0.75236	2.3465	1.1389	1362	1260	1416	1308	1128	1350	1230	1344	0.0079236	0.0085596	1446	0.0073164	1.4384	2.9915	0.55747
untreated-a	200	214	223	1.5097	0.81865	2.1583	1.1713	1464	1362	1518	1416	1230	1434	1350	1428	0.007194	0.0079236	1554	0.0062449	1.3105	2.7441	0.54196
untreated-a	200	214	224	1.4452	0.81865	1.9646	1.1713	1464	1362	1518	1416	1230	1434	1350	1428	0.007194	0.0079236	1554	0.0068879	1.1819	2.7514	0.50498
untreated-a	200	215	227	1.7036	0.78538	2.3506	1.1733	1470	1362	1518	1416	1230	1452	1350	1446	0.0073164	0.0079236	1554	0.0069227	1.5019	3.0538	0.54602
untreated-a	200	215	228	1.963	0.78538	2.6673	1.1733	1488	1362	1530	1416	1230	1452	1350	1446	0.0073164	0.0079236	1548	0.0072424	1.5799	3.1066	0.56446
untreated-a	215	227	244	1.5061	0.85179	2.3568	1.1753	1566	1470	1626	1518	1350	1560	1452	1554	0.0069227	0.0073164	1656	0.0077968	1.511	3.1732	0.51427
untreated-a	227	244	257	1.8307	0.75307	2.4793	1.1784	1680	1566	1728	1626	1452	1662	1560	1656	0.0077968	0.0069227	1758	0.0067276	1.5711	3.1209	0.54937
untreated-a	227	244	258	1.7666	0.75307	2.5489	1.1784	1698	1566	1746	1626	1452	1662	1560	1656	0.0077968	0.0069227	1776	0.0074609	1.505	3.1914	0.52297
untreated-a	548	560	574	1.6373	0.75236	2.3427	1.1389	1362	1260	1416	1308	1128	1350	1230	1344	0.0079236	0.0085596	1428	0.007194	1.5119	2.5434	0.57035
untreated-a	548	560	575	1.5708	0.75236	2.3465	1.1389	1362	1260	1416	1308	1128	1350	1230	1344	0.0079236	0.0085596	1446	0.0073164	1.4384	2.9915	0.55747
untreated-a	560	574	583	1.5097	0.81865	2.1583	1.1713	1464	1362	1518	1416	1230	1434	1350	1428	0.007194	0.0079236	1554	0.0062449	1.3105	2.7441	0.54196
untreated-a	560	574	584	1.4452	0.81865	1.9646	1.1713	1464	1362	1518	1416	1230	1434	1350	1428	0.007194	0.0079236	1554	0.0068879	1.1819	2.7514	0.50498
untreated-a	560	575	587	1.7036	0.78538	2.3506	1.1733	1470	1362	1518	1416	1230	1452	1350	1446	0.0073164	0.0079236	1554	0.0069227	1.5019	3.0538	0.54602
untreated-a	560	575	588	1.963	0.78538	2.6673	1.1733	1488	1362	1530	1416	1230	1452	1350	1446	0.0073164	0.0079236	1548	0.0072424	1.5799	3.1066	0.56446
untreated-a	575	587	604	1.5061	0.85179	2.3568	1.1753	1566	1470	1626	1518	1350	1560	1452	1554	0.0069227	0.0073164	1656	0.0077968	1.511	3.1732	0.51427
untreated-a	587	604	617	1.8307	0.75307	2.4793	1.1784	1680	1566	1728	1626	1452	1662	1560	1656	0.0077968	0.0069227	1758	0.0067276	1.5711	3.1209	0.54937
untreated-a	587	604	618	1.7666	0.75307	2.5489	1.1784	1698	1566	1746	1626	1452	1662	1560	1656	0.0077968	0.0069227	1776	0.0074609	1.505	3.1914	0.52297
untreated-a	856	874	887	1.8932	0.91712	2.5452	1.4632	810	714	858	774	612	786	708	780	0.0079157	0.0089277	870	0.0068408	1.635	2.7969	0.54694
untreated-a	957	974	997	1.8988	0.853	2.6089	1.1776	1446	1332	1494	1386	1152	1422	1284	1416	0.0065256	0.0054214	1518	0.0068367	1.5714	2.9851	0.51105
untreated-a	957	974	998	1.775	0.853	2.4694	1.1776	1458	1332	1506	1386	1152	1422	1284	1416	0.0065256	0.0054214	1536	0.0067388	1.3755	3.0589	0.52513
untreated-a	1007	1027	1041	1.702	0.91421	2.2942	1.24	1752	1656	1800	1704	1518	1734	1626	1728	0.0069262	0.0066623	1818	0.0070215	1.5083	2.6685	0.57998
untreated-a	1027	1041	1051	1.7613	0.85102	2.5442	1.1471	1890	1752	1938	1800	1626	1824	1734	1818	0.0070215	0.0069262	1950	0.0068099	1.1812	2.863	0.6048
untreated-a	1041	1051	1065	1.8367	0.88064	2.5951	1.2721	2004	1890	2052	1938	1734	1956	1824	1950	0.0068099	0.0070215	2076	0.0060597	1.6354	3.1807	0.56108
untreated-a	1041	1051	1066	1.9641	0.88064	2.5354	1.2721	1998	1890	2046	1938	1734	1956	1824	1950	0.0068099	0.0070215	2076	0.0064224	1.245	2.9449	0.57523
untreated-a	1494	1518	1536	2.0247	0.94796	2.6788	1.3967	2184	2052	2232	2112	1896	2136	2028	2130	0.0064404	0.0064624	2256	0.0056503	1.5722	3.1837	0.51094
untreated-a	1493	1521	1541	1.8971	1.0108	2.7973	1.3673	2166	2064	2214	2106	1896	2142	2034	2136	0.0072424	0.0063048	2238	0.007551	1.7023	3.3147	0.52977
untreated-a	1699	1710	1721	1.6374	0.75363	2.2884	1.0722	948	822	996	876	672	912	798	906	0.0067924	0.0063714	1020	0.0068435	1.3117	2.789	0.53602
untreated-a	1699	1710	1722	1.5039	0.75363	2.1656	1.0722	954	822	1002	876	672	912	798	906	0.0067924	0.0063714	1026	0.0071596	1.2419	2.6511	0.48121
untreated-a	1710	1721	1727	1.6423	0.81868	2.6788	1.1442	1062	948	1134	996	798	1026	912	1020	0.0068435	0.0067924	1134	0.0065024	1.3757	2.6788	0.4972
untreated-a	1710	1722	1729	1.4391	0.75194	2.214	1.0828	1068	954	1116	1002	798	1032	912	1026	0.0071596	0.0067924	1134	0.0075195	1.2442	2.5258	0.51671
untreated-a	1721	1727	1735	1.5749	0.82116	2.1516	1.3394	1170	1062	1212	1134	912	1140	1026	1134	0.0065024	0.0068435	1236	0.0078199	1.2422	2.6622	0.53873
untreated-a	1815	1825	1845	1.8327	0.85309	2.4743	1.268	1986	1878	2034	1926	1734	1956	1836	1950	0.007439	0.0073376	2058	0.007265	1.5049	3.1049	0.5408
untreated-a	1824	1839	1850	1.7716	0.91541	2.8075	1.2716	2064	1968	2124	2016	1836	2028	1944	2022	0.0069609	0.0087057	2130	0.0073707	1.3142	2.869	0.52097
untreated-a	1825	1845	1860	1.9614	0.91636	2.3506	1.2371	2088	1986	2130	2034	1836	2064	1956	2058	0.007265	0.007439	2166	0.0067457	1.6297	3.1805	0.50236
untreated-a	1845	1860	1878	2.1588	0.9807	3.0054	1.1753	2226	2088	2268	2130	1956	2172	2064	2166	0.0067457	0.007265	2292	0.0065714	1.7044	3.4935	0.49089
untreated-a	2094	2119	2134	1.9639	1.0734	2.4831	1.3735	1110	996	1164	1044	828	1086	960	1080	0.0052599	0.00591	1212	0.0051578	1.6964	3.3031	0.49827
untreated-a	2094	2119	2135	1.8959	1.0734	2.4118	1.3735	1122	996	1176	1044	828	1086	960	1080	0.0052599	0.00591	1206	0.0051136	1.5675	2.9905	0.56178
untreated-a	2094	2120	2136	1.5832	0.88385	2.1583	1.2105	1128	1002	1170	1056	828	1086	960	1080	0.0059389	0.00591	1212	0.0066071	1.4505	2.9405	0.53433
untreated-a	2119	2135	2172	1.8999	0.94797	2.5418	1.2059	1248	1122	1296	1176	960	1212	1086	1206	0.0051136	0.0052599	1314	0.0061131	1.6419	2.9499	0.47775
untreated-a	2119	2135	2173	1.6369	0.94797	2.3494	1.2059	1248	1122	1302	1176	960	1212	1086	1206	0.0051136	0.0052599	1332	0.0062445	1.3746	2.8753	0.56934
untreated-a	2119	2134	2178	1.762	0.98196	2.4205	1.2416	1224	1110	1284	1164	960	1218	1086	1212	0.0051578	0.0052599	1314	0.0058048	1.6352	3.0025	0.49916
untreated-a	2119	2134	2179	1.6401	0.98196	2.4141	1.2416	1230	1110	1290	1164	960	1218	1086	1212	0.0051578	0.0052599	1320	0.0065797	1.5712	2.9407	0.51495
untreated-a	2120	2136	2181	1.6368	0.79159	2.1595	1.0792	1236	1128	1290	1170	960	1218	1086	1212	0.0066071	0.0059389	1314	0.0061644	1.4473	2.7336	0.37875
untreated-a	2134	2178	2198	1.6984	0.88101	2.4744	1.2102	1350	1224	1410	1284	1086	1320	1218	1314	0.0058048	0.0051578	1440	0.0062287	1.5107	3.0495	0.47936
untreated-a	2135	2172	2199	1.5737	0.94997	2.6485	1.2709	1344	1248	1404	1296	1086	1320	1212	1314	0.0061131	0.0051136	1422	0.0075852	1.4442	2.9952	0.4228
untreated-a	2134	2179	2203	1.7643	0.82007	2.4785	1.2071	1356	1230	1404	1290	1086	1326	1218	1320	0.0065797	0.0051578	1422	0.0063157	1.5102	2.8017	0.51437
untreated-a	2135	2173	2206	1.5757	0.81844	2.0251	1.1747	1368	1248	1410	1302	1086	1338	1212	1332	0.0062445	0.0051136	1422	0.0065299	1.3905	2.413	0.50909
untreated-a	2178	2198	2219	1.765	0.84918	2.475	1.2372	1476	1350	1524	1410	1218	1446	1320	1440	0.0062287	0.0058048	1554	0.0065374	1.5064	3.0576	0.49022
untreated-a	2178	2198	2220	2.0342	0.84918	2.6155	1.2372	1506	1350	1554	1410	1218	1446	1320	1440	0.0062287	0.0058048	1596	0.0057103	1.5077	3.506	0.45971
untreated-a	2198	2220	2244	1.9579	1.0171	2.6188	1.3078	1620	1506	1674	1554	1320	1602	1446	1596	0.0057103	0.0062287	1710	0.0057079	1.7044	3.1917	0.48776
untreated-a	2261	2278	2289	1.7665	0.8534	2.6051	1.2079	2118	1968	2184	2028	1824	2064	1932	2058	0.0057929	0.0062066	2208	0.0055648	1.3735	2.9901	0.50668
untreated-a	2261	2278	2290	1.6416	0.8534	2.342	1.2079	2106	1968	2160	2028	1824	2064	1932	2058	0.0057929	0.0062066	2184	0.0055738	1.5081	2.6887	0.53049
untreated-a	2473	2494	2517	1.7028	0.85453	2.2805	1.1374	990	882	1032	924	708	948	816	942	0.0059572	0.0082631	1056	0.0071345	1.317	2.7948	0.49772
untreated-a	2494	2517	2527	1.5068	0.85142	2.4007	1.1402	1080	990	1146	1032	816	1062	948	1056	0.0071345	0.0059572	1158	0.0068299	1.3757	2.5973	0.46541
untreated-a	2620	2641	2654	2.0257	0.75564	2.9876	1.275	2256	2112	2310	2184	1968	2196	2088	2190	0.0069321	0.0065956	2322	0.0064166	1.4381	3.3108	0.49175
untreated-a	2620	2641	2655	1.8293	0.75564	2.5469	1.275	2250	2112	2304	2184	1968	2196	2088	2190	0.0069321	0.0065956	2328	0.0064538	1.3103	3.0505	0.49128
untreated-a	2821	2848	2878	1.695	0.82085	2.5394	1.2734	876	762	930	822	630	846	726	840	0.0074736	0.0083119	948	0.0074684	1.3132	2.9319	0.40992
untreated-a	2847	2883	2902	1.7092	0.88534	2.4117	1.2402	972	870	1026	918	726	954	858	948	0.0071569	0.0071225	1044	0.0069785	1.5756	2.7986	0.46516
untreated-a	3010	3032	3051	1.3772	0.78642	2.0909	1.0789	1638	1524	1692	1578	1368	1614	1488	1608	0.0058529	0.005582	1698	0.0071601	1.1798	2.2158	0.4993
untreated-a	3425	3454	3470	1.774	0.91856	2.4781	1.2106	1146	1044	1200	1086	876	1122	1014	1116	0.0064775	0.0069489	1218	0.0070392	1.4426	2.9222	0.46206
untreated-a	3425	3454	3471	1.7055	0.91856	2.731	1.2106	1152	1044	1206	1086	876	1122	1014	1116	0.0064775	0.0069489	1218	0.0078434	1.3756	2.9278	0.49512
untreated-a	3454	3470	3494	1.8868	0.88698	2.4828	1.2391	1266	1146	1314	1200	1014	1224	1122	1218	0.0070392	0.0064775	1350	0.0059459	1.5794	3.1831	0.46935
untreated-a	3454	3470	3495	1.7671	0.88698	2.6774	1.2391	1272	1146	1326	1200	1014	1224	1122	1218	0.0070392	0.0064775	1344	0.0065831	1.4462	3.0588	0.43661
untreated-a	3470	3495	3520	1.6997	0.88356	2.5984	1.3387	1374	1272	1434	1326	1122	1350	1224	1344	0.0065831	0.0070392	1458	0.0071337	1.3726	3.0637	0.47187
untreated-a	3470	3494	3523	2.0225	0.9434	2.6041	1.2414	1404	1266	1446	1314	1122	1356	1224	1350	0.0059459	0.0070392	1470	0.0058007	1.6435	3.0726	0.48816
untreated-a	3470	3494	3524	2.0309	0.9434	2.6011	1.2414	1392	1266	1434	1314	1122	1356	1224	1350	0.0059459	0.0070392	1464	0.0058339	1.4401	3.1124	0.50992
untreated-a	3495	3520	3539	1.7619	0.84985	2.5502	1.2992	1488	1374	1536	1434	1224	1464	1350	1458	0.0071337	0.0065831	1560	0.0073622	1.5077	2.9762	0.42855
untreated-a	3495	3520	3540	1.6383	0.84985	2.3527	1.2992	1482	1374	1542	1434	1224	1464	1350	1458	0.0071337	0.0065831	1572	0.0066301	1.3751	2.9301	0.46323
untreated-a	3494	3524	3542	1.9656	1.0154	2.6098	1.3005	1512	1392	1560	1434	1224	1470	1356	1464	0.0058339	0.0059459	1590	0.0060539	1.5739	3.1882	0.44857
untreated-a	3494	3524	3543	2.0882	1.0154	2.7924	1.3005	1524	1392	1572	1434	1224	1470	1356	1464	0.0058339	0.0059459	1596	0.0062926	1.5083	3.3685	0.49924
untreated-a	3494	3523	3547	1.8942	1.0113	2.4829	1.302	1500	1404	1542	1446	1224	1476	1356	1470	0.0058007	0.0059459	1578	0.0072018	1.5063	3.252	0.44166
untreated-a	3494	3523	3548	1.7596	1.0113	2.7929	1.302	1506	1404	1572	1446	1224	1476	1356	1470	0.0058007	0.0059459	1584	0.0067654	1.5125	3.0042	0.47106
untreated-a	3524	3542	3573	1.9018	0.98278	2.7187	1.3049	1620	1512	1674	1560	1356	1596	1470	1590	0.0060539	0.0058339	1680	0.0067735	1.7626	2.9819	0.46988
untreated-a	3524	3542	3574	1.831	0.98278	2.6692	1.3049	1626	1512	1680	1560	1356	1596	1470	1590	0.0060539	0.0058339	1686	0.0067383	1.5057	2.7904	0.50955
untreated-a	3524	3543	3578	1.8318	1.0441	2.6621	1.3962	1620	1524	1674	1572	1356	1602	1470	1596	0.0062926	0.0058339	1704	0.0061289	1.6392	3.1111	0.49327
untreated-a	3660	3686	3714	1.7749	0.85005	2.4109	1.4684	2220	2100	2274	2184	1950	2196	2070	2190	0.0062579	0.0066857	2298	0.0061554	1.578	2.9129	0.44522
untreated-a	3660	3686	3715	1.5746	0.85005	2.2739	1.4684	2220	2100	2268	2184	1950	2196	2070	2190	0.0062579	0.0066857	2292	0.0068397	1.4448	2.6702	0.58968
untreated-a	3950	3986	4015	1.505	0.68798	2.3527	1.104	984	864	1038	924	738	942	846	936	0.0075566	0.0073757	1044	0.0082195	1.116	2.4774	0.47081
untreated-a	3950	3986	4016	1.7058	0.68798	2.2809	1.104	996	864	1050	924	738	942	846	936	0.0075566	0.0073757	1074	0.0065653	1.1819	2.8519	0.4116
untreated-a	3950	3985	4023	1.3155	0.68991	1.9479	1.0358	1002	888	1050	942	738	972	846	966	0.0071491	0.0073757	1074	0.0073494	1.0498	2.3388	0.47393
untreated-a	3950	3985	4024	1.4477	0.68991	1.6359	1.0358	990	888	1014	942	738	972	846	966	0.0071491	0.0073757	1080	0.0071749	1.2562	2.7227	0.47632
untreated-a	3957	3993	4028	1.5702	0.72021	2.1535	1.0096	1032	906	1080	954	750	996	876	990	0.0068601	0.006149	1104	0.0062639	1.1832	2.4904	0.44515
untreated-a	3957	3994	4033	1.504	0.88347	2.09	1.0147	1038	942	1092	966	750	1008	876	1002	0.0068862	0.006149	1116	0.0057881	1.3146	2.4085	0.57405
untreated-a	3986	4015	4042	1.5748	0.75248	2.4635	1.1763	1080	984	1134	1038	846	1050	942	1044	0.0082195	0.0075566	1146	0.0071606	1.3796	2.5343	0.34979
untreated-a	3985	4023	4044	1.3781	0.65775	2.1511	0.97397	1122	1002	1182	1050	846	1080	972	1074	0.0073494	0.0071491	1194	0.0072261	1.122	2.4117	0.44159
untreated-a	3985	4024	4047	1.5748	0.72387	2.2243	0.81793	1122	990	1182	1014	846	1086	972	1080	0.0071749	0.0071491	1206	0.0062357	1.249	2.6646	0.44255
untreated-a	3985	4024	4048	1.6359	0.72387	2.2808	0.81793	1122	990	1170	1014	846	1086	972	1080	0.0071749	0.0071491	1194	0.0069441	1.3748	2.8561	0.46447
untreated-a	3994	4033	4061	1.6978	0.75201	2.4159	1.045	1188	1038	1236	1092	876	1122	1008	1116	0.0057881	0.0068862	1272	0.0066476	1.1884	3.1179	0.54337
untreated-a	3994	4033	4062	1.5039	0.75201	2.0931	1.045	1170	1038	1224	1092	876	1122	1008	1116	0.0057881	0.0068862	1254	0.0058742	1.1844	2.5396	0.52947
untreated-a	4023	4044	4076	1.2486	0.68906	1.8954	1.0755	1224	1122	1278	1182	972	1200	1080	1194	0.0072261	0.0073494	1290	0.0073365	1.1894	2.1464	0.45667
untreated-a	4033	4062	4087	1.4422	0.75196	2.2217	1.0466	1284	1170	1344	1224	1008	1260	1122	1254	0.0058742	0.0057881	1368	0.0071889	1.318	2.7986	0.50994
untreated-a	4033	4062	4088	1.6378	0.75196	2.4161	1.0466	1320	1170	1374	1224	1008	1260	1122	1254	0.0058742	0.0057881	1404	0.0064688	1.3193	3.1163	0.46504
untreated-a	4043	4083	4096	1.6372	0.72049	2.1561	1.0731	1356	1230	1398	1290	1080	1332	1206	1326	0.0071527	0.0073057	1428	0.0068423	1.44	2.8017	0.36967
untreated-a	4043	4084	4097	1.4707	0.88344	2.2245	1.202	1320	1254	1386	1296	1080	1332	1206	1326	0.0072013	0.0073057	1422	0.0076854	1.5089	2.9236	0.49501
untreated-a	4043	4084	4099	1.4707	0.88344	2.0843	1.202	1320	1254	1374	1296	1080	1332	1206	1326	0.0072013	0.0073057	1398	0.008108	1.5692	2.6151	0.42408
untreated-a	4062	4088	4107	1.5043	0.81892	2.3445	1.208	1428	1320	1488	1374	1122	1410	1260	1404	0.0064688	0.0058742	1512	0.0073669	1.3796	2.8086	0.45423
untreated-a	4062	4088	4108	1.7761	0.81892	2.2844	1.208	1428	1320	1476	1374	1122	1410	1260	1404	0.0064688	0.0058742	1500	0.0059566	1.6316	2.7406	0.4852
untreated-a	4084	4097	4109	1.5074	0.73535	2.2834	1.1122	1440	1320	1488	1386	1206	1428	1332	1422	0.0076854	0.0072013	1524	0.0083414	1.447	2.9946	0.43132
untreated-a	4083	4096	4114	1.4359	0.81859	2.1378	1.078	1452	1356	1506	1398	1206	1434	1332	1428	0.0068423	0.0071527	1548	0.0075358	1.3109	2.9231	0.4805
untreated-a	4088	4108	4120	2.0754	0.88804	2.7362	1.1422	1572	1428	1614	1476	1260	1506	1410	1500	0.0059566	0.0064688	1644	0.0067118	1.3789	3.3766	0.42866
untreated-a	4088	4107	4123	1.3776	0.75215	2.2176	1.1723	1524	1428	1584	1488	1260	1518	1410	1512	0.0073669	0.0064688	1608	0.0080783	1.3143	2.7379	0.53997
untreated-a	4096	4114	4126	1.5053	0.71795	1.8339	1.0689	1554	1452	1584	1506	1332	1554	1434	1548	0.0075358	0.0068423	1632	0.0080422	1.5053	2.7885	0.52879
untreated-a	4096	4114	4127	1.4457	0.71795	2.2924	1.0689	1560	1452	1620	1506	1332	1554	1434	1548	0.0075358	0.0068423	1662	0.0084053	1.3759	3.3732	0.49735
untreated-a	4114	4126	4134	1.572	0.75266	2.3555	0.91694	1668	1554	1728	1584	1434	1638	1554	1632	0.0080422	0.0075358	1734	0.006599	1.4524	2.5403	0.45424
untreated-a	4108	4120	4136	2.0262	1.0377	2.5514	1.3681	1686	1572	1728	1614	1410	1650	1506	1644	0.0067118	0.0059566	1746	0.0065832	1.5754	3.0069	0.50612
untreated-a	4120	4136	4150	2.0224	1.0131	2.5385	1.2757	1776	1686	1818	1728	1506	1752	1650	1746	0.0065832	0.0067118	1848	0.0066117	1.6373	3.1809	0.41687
untreated-a	5170	5188	5195	1.576	0.78778	2.2891	1.1426	1662	1560	1728	1614	1410	1650	1554	1644	0.0069994	0.0058475	1758	0.0068234	1.3724	2.9297	0.48386
untreated-a	332	347	370	1.6378	0.78534	2.4246	1.1077	1608	1494	1668	1548	1368	1584	1476	1578	0.0068742	0.0072794	1686	0.0069673	1.4447	2.8536	0.53201
untreated-a	332	347	371	1.5046	0.78534	2.281	1.1077	1602	1494	1656	1548	1368	1584	1476	1578	0.0068742	0.0072794	1692	0.007381	1.3067	2.9235	0.58167
untreated-a	347	370	398	1.5125	0.8189	2.291	1.2123	1710	1608	1770	1668	1476	1692	1584	1686	0.0069673	0.0068742	1812	0.0070378	1.3766	3.1823	0.52119
untreated-a	347	371	399	1.8264	0.7523	2.2893	1.1405	1728	1602	1758	1656	1476	1698	1584	1692	0.007381	0.0068742	1782	0.00752	1.5034	2.8126	0.57435
untreated-a	347	371	400	1.4412	0.7523	2.1575	1.1405	1704	1602	1764	1656	1476	1698	1584	1692	0.007381	0.0068742	1812	0.0064081	1.376	2.8807	0.51612
untreated-a	371	399	415	1.8965	0.91319	2.6195	1.1447	1830	1728	1884	1758	1584	1788	1698	1782	0.00752	0.007381	1908	0.0066083	1.5021	3.1313	0.54754
untreated-a	371	399	416	1.8952	0.91319	2.6715	1.1447	1836	1728	1884	1758	1584	1788	1698	1782	0.00752	0.007381	1902	0.0070225	1.449	3.1768	0.56567
untreated-a	371	400	421	1.7018	0.72061	2.5422	1.0787	1848	1704	1908	1764	1584	1818	1698	1812	0.0064081	0.007381	1932	0.0067051	1.437	2.9885	0.50343
untreated-a	400	421	442	2.0958	0.85091	2.9266	1.2711	1986	1848	2040	1908	1698	1938	1818	1932	0.0067051	0.0064081	2052	0.0065602	1.5126	3.1834	0.53171
untreated-a	400	421	443	1.6969	0.85091	2.341	1.2711	1980	1848	2034	1908	1698	1938	1818	1932	0.0067051	0.0064081	2070	0.0059257	1.3772	3.0006	0.53951
untreated-a	421	442	467	1.9636	1.0479	2.5461	1.4633	2088	1986	2136	2040	1818	2058	1938	2052	0.0065602	0.0067051	2160	0.0061464	1.6357	3.0578	0.50573
untreated-a	421	442	468	1.6404	1.0479	2.1625	1.4633	2076	1986	2124	2040	1818	2058	1938	2052	0.0065602	0.0067051	2160	0.0065099	1.511	2.8676	0.54138
untreated-a	421	443	469	1.8952	0.84846	2.5472	1.1705	2118	1980	2166	2034	1818	2076	1938	2070	0.0059257	0.0067051	2184	0.0061555	1.4446	2.8602	0.54657
untreated-a	421	443	470	1.7021	0.84846	2.287	1.1705	2106	1980	2166	2034	1818	2076	1938	2070	0.0059257	0.0067051	2190	0.0058218	1.4533	2.8014	0.53031
untreated-a	442	468	484	1.635	0.82022	2.3449	1.0812	2196	2076	2244	2124	1938	2166	2058	2160	0.0065099	0.0065602	2268	0.0075477	1.4408	3.0538	0.54175
untreated-a	443	470	492	1.7648	0.85104	2.3493	1.1435	2244	2106	2292	2166	1938	2196	2076	2190	0.0058218	0.0059257	2310	0.0059275	1.3739	2.6681	0.57311
untreated-a	856	871	894	1.6378	0.78534	2.4246	1.1077	1608	1494	1668	1548	1368	1584	1476	1578	0.0068742	0.0072794	1686	0.0069673	1.4447	2.8536	0.53201
untreated-a	856	871	895	1.5046	0.78534	2.281	1.1077	1602	1494	1656	1548	1368	1584	1476	1578	0.0068742	0.0072794	1692	0.007381	1.3067	2.9235	0.58167
untreated-a	871	894	922	1.5125	0.8189	2.291	1.2123	1710	1608	1770	1668	1476	1692	1584	1686	0.0069673	0.0068742	1812	0.0070378	1.3766	3.1823	0.52119
untreated-a	871	895	923	1.8264	0.7523	2.2893	1.1405	1728	1602	1758	1656	1476	1698	1584	1692	0.007381	0.0068742	1782	0.00752	1.5034	2.8126	0.57435
untreated-a	871	895	924	1.4412	0.7523	2.1575	1.1405	1704	1602	1764	1656	1476	1698	1584	1692	0.007381	0.0068742	1812	0.0064081	1.376	2.8807	0.51612
untreated-a	895	923	939	1.8965	0.91319	2.6195	1.1447	1830	1728	1884	1758	1584	1788	1698	1782	0.00752	0.007381	1908	0.0066083	1.5021	3.1313	0.54754
untreated-a	895	923	940	1.8952	0.91319	2.6715	1.1447	1836	1728	1884	1758	1584	1788	1698	1782	0.00752	0.007381	1902	0.0070225	1.449	3.1768	0.56567
untreated-a	895	924	945	1.7018	0.72061	2.5422	1.0787	1848	1704	1908	1764	1584	1818	1698	1812	0.0064081	0.007381	1932	0.0067051	1.437	2.9885	0.50343
untreated-a	924	945	966	2.0958	0.85091	2.9266	1.2711	1986	1848	2040	1908	1698	1938	1818	1932	0.0067051	0.0064081	2052	0.0065602	1.5126	3.1834	0.53171
untreated-a	924	945	967	1.6969	0.85091	2.341	1.2711	1980	1848	2034	1908	1698	1938	1818	1932	0.0067051	0.0064081	2070	0.0059257	1.3772	3.0006	0.53951
untreated-a	945	966	991	1.9636	1.0479	2.5461	1.4633	2088	1986	2136	2040	1818	2058	1938	2052	0.0065602	0.0067051	2160	0.0061464	1.6357	3.0578	0.50573
untreated-a	945	966	992	1.6404	1.0479	2.1625	1.4633	2076	1986	2124	2040	1818	2058	1938	2052	0.0065602	0.0067051	2160	0.0065099	1.511	2.8676	0.54138
untreated-a	945	967	993	1.8952	0.84846	2.5472	1.1705	2118	1980	2166	2034	1818	2076	1938	2070	0.0059257	0.0067051	2184	0.0061555	1.4446	2.8602	0.54657
untreated-a	945	967	994	1.7021	0.84846	2.287	1.1705	2106	1980	2166	2034	1818	2076	1938	2070	0.0059257	0.0067051	2190	0.0058218	1.4533	2.8014	0.53031
untreated-a	966	992	1008	1.635	0.82022	2.3449	1.0812	2196	2076	2244	2124	1938	2166	2058	2160	0.0065099	0.0065602	2268	0.0075477	1.4408	3.0538	0.54175
untreated-a	967	994	1016	1.7648	0.85104	2.3493	1.1435	2244	2106	2292	2166	1938	2196	2076	2190	0.0058218	0.0059257	2310	0.0059275	1.3739	2.6681	0.57311
untreated-a	1273	1303	1327	1.8354	1.0138	2.4752	1.3396	1242	1086	1284	1134	912	1164	1062	1158	0.0063107	0.0061546	1308	0.0058475	1.5072	3.0504	0.49647
untreated-a	1303	1327	1357	1.8321	0.91772	2.4648	1.2376	1368	1242	1410	1284	1062	1314	1164	1308	0.0058475	0.0063107	1440	0.0069208	1.3766	3.1209	0.54929
untreated-a	1394	1424	1442	1.568	0.7545	2.2153	1.1418	1914	1770	1962	1830	1602	1878	1752	1872	0.0064376	0.0065683	2010	0.0064204	1.3761	3.1114	0.53955
untreated-a	1394	1424	1443	1.8304	0.7545	2.5353	1.1418	1926	1770	1974	1830	1602	1878	1752	1872	0.0064376	0.0065683	2004	0.0068905	1.3746	3.2513	0.4767
untreated-a	1394	1425	1444	1.6331	0.91426	2.155	1.1744	1908	1782	1962	1830	1602	1884	1752	1878	0.0054959	0.0065683	2004	0.0055048	1.4413	2.8124	0.5893
untreated-a	1394	1425	1445	1.7667	0.91426	2.4122	1.1744	1908	1782	1956	1830	1602	1884	1752	1878	0.0054959	0.0065683	1986	0.006913	1.6398	3.1953	0.55145
untreated-a	1425	1445	1459	1.9618	0.88335	2.6756	1.2061	2028	1908	2076	1956	1752	1992	1884	1986	0.006913	0.0054959	2094	0.0063653	1.4456	2.9356	0.56821
untreated-a	1425	1444	1466	1.5689	0.81654	2.2213	1.0775	2046	1908	2100	1962	1752	2010	1884	2004	0.0055048	0.0054959	2136	0.0063046	1.3784	2.8022	0.56669
untreated-a	1425	1444	1467	1.6389	0.81654	2.2232	1.0775	2046	1908	2094	1962	1752	2010	1884	2004	0.0055048	0.0054959	2118	0.0066108	1.3775	2.7389	0.57081
untreated-a	1424	1442	1471	1.8941	0.78401	2.7375	1.1076	2064	1914	2112	1962	1752	2016	1878	2010	0.0064204	0.0064376	2136	0.0068332	1.4481	3.2504	0.52364
untreated-a	1444	1467	1486	1.5078	0.81947	2.0253	1.1116	2148	2046	2196	2094	1884	2124	2010	2118	0.0066108	0.0055048	2238	0.0068137	1.3809	2.8661	0.57383
untreated-a	1444	1466	1489	1.5067	0.78444	2.4154	1.1106	2160	2046	2220	2100	1884	2142	2010	2136	0.0063046	0.0055048	2232	0.0073667	1.3789	2.5501	0.59987
untreated-a	1444	1466	1490	1.7004	0.78444	2.2284	1.1106	2172	2046	2220	2100	1884	2142	2010	2136	0.0063046	0.0055048	2262	0.0060819	1.4451	2.984	0.56543
untreated-a	1442	1471	1491	1.8297	0.94707	2.5437	1.3688	2166	2064	2226	2112	1878	2142	2016	2136	0.0068332	0.0064204	2232	0.0056218	1.5722	2.6015	0.48684
untreated-a	1442	1471	1492	2.085	0.94707	2.8015	1.3688	2184	2064	2232	2112	1878	2142	2016	2136	0.0068332	0.0064204	2256	0.0060343	1.7061	3.3147	0.51941
untreated-a	1466	1489	1507	1.8315	0.75335	2.5397	1.2077	2304	2160	2358	2220	2010	2238	2142	2232	0.0073667	0.0063046	2382	0.0059392	1.2528	2.9282	0.56882
untreated-a	1466	1489	1508	1.5698	0.75335	2.219	1.2077	2274	2160	2328	2220	2010	2238	2142	2232	0.0073667	0.0063046	2382	0.0062791	1.3185	3.0538	0.49905
untreated-a	1471	1492	1521	1.883	1.0425	2.5283	1.4007	2292	2184	2340	2232	2016	2262	2142	2256	0.0060343	0.0068332	2358	0.005771	1.6381	2.9344	0.48089
untreated-a	1466	1490	1522	1.6402	0.85018	2.2802	1.1142	2286	2172	2334	2220	2010	2268	2142	2262	0.0060819	0.0063046	2370	0.0066842	1.5705	2.8648	0.50737
untreated-a	1466	1490	1523	1.6419	0.85018	2.3452	1.1142	2298	2172	2346	2220	2010	2268	2142	2262	0.0060819	0.0063046	2376	0.0068581	1.4426	2.9295	0.54722
untreated-a	1720	1744	1761	1.7028	0.75095	2.3485	1.1117	798	684	840	732	600	762	696	756	0.0077015	0.0082061	858	0.0073487	1.3765	2.713	0.53037
untreated-a	1744	1761	1782	1.6369	0.85142	2.0937	1.1743	900	798	942	840	696	864	762	858	0.0073487	0.0077015	960	0.0063215	1.3077	2.4005	0.43996
untreated-a	1743	1763	1784	1.6379	0.8875	2.1587	1.2102	918	792	966	846	684	888	774	882	0.0064953	0.0085366	1008	0.0063442	1.3706	2.9283	0.55237
untreated-a	1785	1804	1831	1.8295	0.85013	2.3471	1.3603	1152	1038	1194	1104	888	1140	1002	1134	0.0062696	0.0060078	1236	0.0065604	1.765	3.2604	0.52877
untreated-a	1804	1831	1849	1.3797	0.91473	1.9571	1.1736	1242	1152	1296	1194	1002	1242	1140	1236	0.0065604	0.0062696	1332	0.0069163	1.3797	2.5914	0.5257
untreated-a	1831	1849	1878	1.5108	0.68986	2.2854	0.97855	1362	1242	1422	1296	1140	1338	1242	1332	0.0069163	0.0065604	1452	0.0068513	1.3147	2.8071	0.52192
untreated-a	1849	1878	1894	1.571	0.75541	2.3465	1.1427	1476	1362	1536	1422	1242	1458	1338	1452	0.0068513	0.0069163	1560	0.0077629	1.3752	2.9987	0.47053
untreated-a	1878	1894	1915	1.6364	0.78549	2.5357	1.1733	1596	1476	1656	1536	1338	1566	1458	1560	0.0077629	0.0068513	1662	0.0068996	1.4467	2.6595	0.46326
untreated-a	1932	1944	1959	1.7	0.8498	2.2754	1.2763	1914	1812	1956	1872	1680	1890	1782	1884	0.0068937	0.0074685	1980	0.0073057	1.4432	2.6791	0.52431
untreated-a	1932	1944	1960	1.5691	0.8498	2.0881	1.2763	1914	1812	1962	1872	1680	1890	1782	1884	0.0068937	0.0074685	1986	0.0079373	1.3788	2.7339	0.4264
untreated-a	1978	2004	2017	1.6328	0.88307	2.2856	1.1781	2292	2190	2346	2232	2022	2262	2148	2256	0.0064931	0.0074796	2370	0.0062935	1.3088	2.6615	0.46496
untreated-a	1977	2006	2022	1.8331	0.88539	2.4724	1.1737	2322	2196	2376	2244	2022	2274	2154	2268	0.0064795	0.0067994	2394	0.005395	1.4413	2.6814	0.55248
untreated-a	2218	2234	2268	1.8997	0.88103	2.2124	1.1399	1050	900	1074	948	768	972	858	966	0.0058173	0.0067616	1122	0.0056258	1.2523	2.9393	0.52489
untreated-a	2218	2234	2269	2.1614	0.88103	2.8018	1.1399	1056	900	1092	948	768	972	858	966	0.0058173	0.0067616	1116	0.0062565	1.3791	3.3764	0.52288
untreated-a	2234	2269	2298	1.8976	1.0807	2.4133	1.4009	1134	1056	1176	1092	858	1122	972	1116	0.0062565	0.0058173	1206	0.006884	1.8247	3.1812	0.4753
untreated-a	2269	2298	2317	1.894	0.94881	2.6033	1.2066	1260	1134	1302	1176	972	1212	1122	1206	0.006884	0.0062565	1326	0.006793	1.5069	3.1282	0.45781
untreated-a	2269	2298	2318	2.0956	0.94881	2.8011	1.2066	1260	1134	1302	1176	972	1212	1122	1206	0.006884	0.0062565	1320	0.0065893	1.633	3.1756	0.48243
untreated-a	2298	2318	2350	1.7569	1.0478	2.3496	1.4006	1362	1260	1410	1302	1122	1326	1212	1320	0.0065893	0.006884	1434	0.0065046	1.3841	2.8621	0.52603
untreated-a	2297	2326	2353	1.8395	0.85025	2.4816	1.1415	1410	1260	1452	1314	1122	1344	1236	1338	0.0053807	0.0062627	1494	0.0064188	1.3157	3.3212	0.50386
untreated-a	2326	2353	2390	2.0222	0.91977	2.7282	1.2408	1530	1410	1578	1452	1236	1500	1344	1494	0.0064188	0.0053807	1596	0.0061068	1.701	3.0668	0.48386
untreated-a	2326	2353	2391	1.8279	0.91977	2.4782	1.2408	1524	1410	1572	1452	1236	1500	1344	1494	0.0064188	0.0053807	1596	0.0070048	1.5777	3.0519	0.48065
untreated-a	2353	2390	2421	1.9603	1.0111	2.9279	1.3641	1638	1530	1698	1578	1344	1602	1500	1596	0.0061068	0.0064188	1698	0.0072152	1.507	2.9279	0.45822
untreated-a	2425	2451	2488	1.7659	0.85036	2.4061	1.1398	1920	1794	1968	1842	1620	1872	1758	1866	0.0061222	0.0058019	1992	0.0063244	1.3139	2.8739	0.44594
untreated-a	2449	2483	2533	1.7598	0.91982	2.4148	1.2433	2082	1950	2136	2004	1746	2040	1872	2034	0.0052022	0.0055141	2166	0.0059161	1.5057	2.9208	0.57127
untreated-a	2483	2533	2555	1.5037	0.87992	2.3465	1.2074	2184	2082	2250	2136	1872	2172	2040	2166	0.0059161	0.0052022	2268	0.0067961	1.4416	2.6053	0.57697
untreated-a	2872	2885	2904	1.8331	1.0109	2.5369	1.3398	1818	1692	1872	1740	1500	1770	1650	1764	0.0059238	0.0058305	1896	0.0060094	1.3806	3.0491	0.49277
untreated-a	2872	2885	2905	2.0233	1.0109	2.7948	1.3398	1812	1692	1866	1740	1500	1770	1650	1764	0.0059238	0.0058305	1890	0.005344	1.702	3.2024	0.52265
untreated-a	2872	2884	2907	1.6962	0.95074	2.0938	1.3061	1842	1698	1872	1758	1500	1788	1650	1782	0.0054586	0.0058305	1932	0.0058884	1.3768	3.1259	0.4838
untreated-a	2879	2895	2908	1.8943	0.88357	2.5504	1.1376	1848	1710	1890	1752	1548	1800	1680	1794	0.0061823	0.0061805	1920	0.0069688	1.4389	3.2566	0.525
untreated-a	2879	2895	2910	1.7698	0.88357	2.3479	1.1376	1836	1710	1896	1752	1548	1800	1680	1794	0.0061823	0.0061805	1926	0.0047946	1.5042	2.8502	0.37634
untreated-a	2885	2904	2924	1.8397	0.91653	2.4748	1.2685	1932	1818	1992	1872	1650	1902	1770	1896	0.0060094	0.0059238	1998	0.0052752	1.5762	2.6024	0.43646
untreated-a	2885	2904	2925	1.5786	0.91653	2.0888	1.2685	1920	1818	1968	1872	1650	1902	1770	1896	0.0060094	0.0059238	1992	0.0064827	1.3732	2.535	0.52092
untreated-a	2895	2910	2932	1.5732	0.88492	1.9699	1.174	1968	1836	2022	1896	1680	1932	1800	1926	0.0047946	0.0061823	2064	0.0047205	1.3827	2.5289	0.51266
untreated-a	2895	2910	2933	1.8887	0.88492	2.2806	1.174	1974	1836	2010	1896	1680	1932	1800	1926	0.0047946	0.0061823	2028	0.0071391	1.3109	2.6	0.42763
untreated-a	2884	2907	2934	1.6364	0.84809	2.0322	1.0469	1968	1842	1998	1872	1650	1938	1788	1932	0.0058884	0.0054586	2058	0.0063635	1.3801	2.9293	0.49211
untreated-a	2884	2907	2935	2.3464	0.84809	3.1258	1.0469	2004	1842	2058	1872	1650	1938	1788	1932	0.0058884	0.0054586	2082	0.0054835	1.7021	3.5747	0.48826
untreated-a	2904	2925	2948	1.7685	0.78931	2.6103	1.0444	2070	1920	2118	1968	1770	1998	1902	1992	0.0064827	0.0060094	2136	0.0069807	1.1837	3.0528	0.51634
untreated-a	2904	2924	2950	1.8942	0.91983	2.4744	1.2374	2070	1932	2130	1992	1770	2004	1902	1998	0.0052752	0.0060094	2154	0.0049961	1.3794	2.983	0.34012
untreated-a	2904	2924	2951	1.6415	0.91983	2.4117	1.2374	2058	1932	2112	1992	1770	2004	1902	1998	0.0052752	0.0060094	2130	0.0062877	1.3135	2.6742	0.56067
untreated-a	2907	2934	2960	1.9608	0.81821	2.6774	1.0161	2106	1968	2154	1998	1788	2064	1938	2058	0.0063635	0.0058884	2172	0.0062753	1.6378	3.0634	0.467
untreated-a	2907	2935	2966	2.0263	1.1732	2.6125	1.5629	2130	2004	2178	2058	1788	2088	1938	2082	0.0054835	0.0058884	2208	0.0054149	1.6356	3.0611	0.49424
untreated-a	2907	2935	2967	2.3455	1.1732	3.1812	1.5629	2136	2004	2196	2058	1788	2088	1938	2082	0.0054835	0.0058884	2220	0.0049356	1.96	3.5773	0.3207
untreated-a	2924	2951	2975	1.694	0.82075	2.5897	1.2059	2178	2058	2244	2112	1902	2136	2004	2130	0.0062877	0.0052752	2250	0.0061029	1.3844	2.6747	0.54684
untreated-a	2924	2951	2976	1.638	0.82075	2.3512	1.2059	2160	2058	2220	2112	1902	2136	2004	2130	0.0062877	0.0052752	2244	0.0063298	1.3796	2.8042	0.48251
untreated-a	2924	2950	2979	1.8985	0.9471	2.5948	1.2372	2208	2070	2262	2130	1902	2160	2004	2154	0.0049961	0.0052752	2292	0.0052893	1.6422	3.105	0.3176
untreated-a	2924	2950	2980	1.961	0.9471	2.4845	1.2372	2226	2070	2274	2130	1902	2160	2004	2154	0.0049961	0.0052752	2322	0.0052526	1.3829	3.1886	0.52533
untreated-a	2935	2966	2989	1.7691	1.0132	2.4154	1.3062	2250	2130	2310	2178	1938	2214	2088	2208	0.0054149	0.0054835	2334	0.0054138	1.4397	2.7848	0.45176
untreated-a	2935	2966	2990	1.8263	1.0132	2.4705	1.3062	2256	2130	2304	2178	1938	2214	2088	2208	0.0054149	0.0054835	2322	0.0058242	1.5096	2.7969	0.51566
untreated-a	2935	2967	2991	2.2775	1.1727	3.0519	1.5906	2280	2136	2340	2196	1938	2226	2088	2220	0.0049356	0.0054835	2370	0.0044988	1.8976	3.4981	0.31197
untreated-a	2951	2975	3000	1.3778	0.84698	2.1558	1.2948	2280	2178	2346	2244	2004	2256	2136	2250	0.0061029	0.0062877	2370	0.0068536	1.1828	2.5411	0.5044
untreated-a	3235	3246	3268	1.5725	0.85212	2.2835	1.1069	1242	1146	1296	1188	984	1224	1110	1218	0.0069734	0.006572	1320	0.0074581	1.4361	2.857	0.47681
untreated-a	3240	3252	3272	1.8834	0.75237	2.6741	1.1093	1290	1158	1332	1212	1008	1242	1116	1236	0.0066984	0.0076687	1374	0.0072081	1.3786	3.5182	0.49841
untreated-a	3240	3253	3273	1.706	0.91445	2.6543	1.2661	1284	1176	1344	1224	1008	1242	1116	1236	0.0064445	0.0076687	1356	0.0068135	1.3753	2.795	0.51196
untreated-a	3253	3273	3290	1.6408	0.85298	2.2235	1.3271	1386	1284	1440	1344	1116	1362	1242	1356	0.0068135	0.0064445	1470	0.0064227	1.4421	2.7986	0.53353
untreated-a	3252	3272	3296	1.9608	0.94168	2.6688	1.337	1392	1290	1440	1332	1116	1380	1242	1374	0.0072081	0.0066984	1458	0.0069486	1.8279	3.1177	0.50905
untreated-a	3252	3272	3297	1.8288	0.94168	2.5493	1.337	1392	1290	1446	1332	1116	1380	1242	1374	0.0072081	0.0066984	1476	0.0067531	1.7041	3.1702	0.48423
untreated-a	3272	3296	3305	1.7654	0.98038	2.8651	1.3344	1500	1392	1566	1440	1242	1464	1380	1458	0.0069486	0.0072081	1572	0.0074304	1.375	3.0515	0.49897
untreated-a	3272	3297	3312	1.7627	0.9144	2.4529	1.2746	1512	1392	1554	1446	1242	1482	1380	1476	0.0067531	0.0072081	1572	0.0070359	1.5054	2.7922	0.49305
untreated-a	3297	3312	3324	1.7644	0.88136	2.422	1.2265	1614	1512	1668	1554	1380	1578	1482	1572	0.0070359	0.0067531	1692	0.006617	1.4429	2.8654	0.54536
untreated-a	3297	3312	3326	1.5738	0.88136	2.2249	1.2265	1614	1512	1662	1554	1380	1578	1482	1572	0.0070359	0.0067531	1692	0.0066146	1.3803	2.8057	0.55378
untreated-a	3312	3326	3347	1.5082	0.78692	2.1527	1.1125	1716	1614	1758	1662	1482	1698	1578	1692	0.0066146	0.0070359	1788	0.0080977	1.439	2.874	0.52785
untreated-a	3375	3399	3414	1.5764	0.75287	2.1428	1.0728	2178	2058	2220	2100	1896	2130	2016	2124	0.0078155	0.0070005	2256	0.0070947	1.246	2.8043	0.49235
untreated-a	3399	3414	3450	1.7061	0.78821	1.898	1.0714	2292	2178	2322	2220	2016	2262	2130	2256	0.0070947	0.0078155	2364	0.0068571	1.3854	2.679	0.53043
untreated-a	3399	3414	3451	1.6354	0.78821	2.2864	1.0714	2298	2178	2346	2220	2016	2262	2130	2256	0.0070947	0.0078155	2382	0.0068137	1.3766	2.9861	0.52477
untreated-a	3727	3745	3769	2.095	0.88292	2.5973	1.273	1584	1452	1614	1506	1290	1530	1386	1524	0.0054164	0.0082101	1632	0.0068452	1.4405	2.9974	0.49835
untreated-a	3727	3745	3770	1.7717	0.88292	2.4164	1.273	1572	1452	1626	1506	1290	1530	1386	1524	0.0054164	0.0082101	1656	0.0065529	1.3136	2.9904	0.499
untreated-a	3745	3769	3779	1.708	1.0475	2.5461	1.2986	1656	1584	1710	1614	1386	1638	1530	1632	0.0068452	0.0054164	1734	0.0074076	1.5099	2.9354	0.34799
untreated-a	3745	3770	3783	1.7732	0.88584	2.4788	1.2082	1686	1572	1734	1626	1386	1662	1530	1656	0.0065529	0.0054164	1746	0.0060816	1.6446	2.6798	0.50957
untreated-a	3745	3770	3784	1.8944	0.88584	2.4623	1.2082	1704	1572	1752	1626	1386	1662	1530	1656	0.0065529	0.0054164	1788	0.00643	1.505	3.3853	0.50624
untreated-a	3769	3779	3792	1.7012	0.85401	2.7344	1.2731	1770	1656	1836	1710	1530	1740	1638	1734	0.0074076	0.0068452	1842	0.0072085	1.3134	2.8694	0.4454
untreated-a	3779	3792	3804	2.0221	0.85062	2.6093	1.3672	1890	1770	1938	1836	1638	1848	1740	1842	0.0072085	0.0074076	1956	0.0060676	1.5101	3.0445	0.41241
untreated-a	4220	4258	4287	1.5721	0.94932	2.612	1.4316	1524	1428	1596	1488	1260	1500	1392	1494	0.0069207	0.0061671	1596	0.0059577	1.6416	2.612	0.3437
untreated-a	4220	4258	4288	1.9001	0.94932	2.6741	1.4316	1524	1428	1572	1488	1260	1500	1392	1494	0.0069207	0.0061671	1596	0.0077845	1.389	3.1971	0.4777
untreated-a	4220	4257	4289	1.9569	1.0775	2.8081	1.4317	1518	1428	1572	1476	1260	1506	1392	1500	0.0065544	0.0061671	1602	0.0065392	1.6377	3.3144	0.47731
untreated-a	4258	4288	4299	1.9517	0.95003	2.5419	1.337	1638	1524	1686	1572	1392	1602	1500	1596	0.0077845	0.0069207	1710	0.0059718	1.5099	3.0011	0.50835
untreated-a	4257	4289	4304	1.9668	0.97844	2.7404	1.4041	1662	1518	1710	1572	1392	1608	1506	1602	0.0065392	0.0065544	1740	0.0068187	1.5053	3.4352	0.51724
untreated-a	4288	4299	4321	1.7631	0.97584	2.286	1.2709	1746	1638	1794	1686	1500	1716	1602	1710	0.0059718	0.0077845	1818	0.0061996	1.51	2.7364	0.42356
untreated-a	4288	4299	4322	1.9553	0.97584	2.7364	1.2709	1758	1638	1806	1686	1500	1716	1602	1710	0.0059718	0.0077845	1830	0.0067389	1.5071	3.2395	0.48335
untreated-a	4289	4304	4327	1.6327	0.98339	2.0278	1.3702	1764	1662	1812	1710	1506	1746	1608	1740	0.0068187	0.0065392	1854	0.0060119	1.4469	2.7416	0.42719
untreated-a	4289	4304	4328	2.0899	0.98339	2.6105	1.3702	1764	1662	1806	1710	1506	1746	1608	1740	0.0068187	0.0065392	1836	0.0057496	1.8335	3.2445	0.47502
untreated-a	4299	4322	4339	1.7713	0.97765	2.4137	1.3682	1878	1758	1932	1806	1602	1836	1716	1830	0.0067389	0.0059718	1950	0.0059076	1.3768	2.6737	0.47209
untreated-a	4299	4322	4340	2.2208	0.97765	3.2017	1.3682	1878	1758	1932	1806	1602	1836	1716	1830	0.0067389	0.0059718	1950	0.0061608	1.8943	3.6411	0.51337
untreated-a	4364	4385	4414	1.778	1.0144	2.4205	1.3675	2202	2082	2250	2142	1956	2166	2046	2160	0.0055573	0.0065245	2268	0.0063266	1.5087	2.855	0.52495
untreated-a	4385	4414	4436	1.8327	0.88899	2.6709	1.2103	2328	2202	2376	2250	2046	2274	2166	2268	0.0063266	0.0055573	2394	0.007129	1.3772	3.073	0.47808
untreated-a	4854	4877	4888	1.7698	0.88325	2.2868	1.1421	2202	2070	2250	2124	1890	2154	2022	2148	0.0054447	0.0055146	2286	0.0056048	1.3793	2.9235	0.38552
untreated-a	4854	4877	4889	1.7062	0.88325	2.4731	1.1421	2190	2070	2250	2124	1890	2154	2022	2148	0.0054447	0.0055146	2286	0.0063543	1.2462	2.926	0.48449
untreated-a	4876	4886	4906	1.8939	0.88338	2.4782	0.9481	2322	2184	2376	2208	2022	2268	2148	2262	0.0061598	0.0056595	2394	0.0049377	1.4482	2.6761	0.35242
untreated-a	4877	4888	4913	1.8358	0.88488	2.4643	1.1434	2328	2202	2382	2250	2022	2292	2154	2286	0.0056048	0.0054447	2394	0.0060824	1.4393	2.6773	0.43454
untreated-a	5035	5046	5056	1.632	0.88032	2.2213	1.3282	1050	954	1098	1008	792	1014	900	1008	0.0065859	0.0056328	1116	0.0085116	1.2577	2.7207	0.4232
untreated-a	5326	5340	5363	1.5739	0.72342	2.2291	0.9152	1254	1110	1308	1158	966	1206	1086	1200	0.0060773	0.0054062	1338	0.0067552	1.1197	2.7982	0.49597
untreated-a	5325	5345	5369	1.645	0.88389	2.2105	1.1443	1272	1158	1320	1206	966	1236	1104	1230	0.0052603	0.004668	1338	0.0064925	1.3179	2.6053	0.4722
untreated-a	5405	5419	5436	1.5168	0.72841	2.033	0.81983	1698	1572	1746	1602	1500	1686	1584	1680	0.0063029	0.0057722	1776	0.0066802	1.3144	2.4799	0.56707
untreated-a	5450	5467	5482	1.6343	0.72045	2.5477	0.91336	2106	1974	2166	2004	1746	2052	1914	2046	0.0072322		2166	0.0066046	1.1859	2.5477	0.41444
untreated-a	5452	5470	5486	1.6348	0.88253	2.083	1.2037	2124	1986	2154	2040	1776	2064	1938	2058	0.0055176	0.0054222	2184	0.0063396	1.2445	2.7756	0.35974
untreated-a	5470	5486	5498	1.6259	0.8174	2.4131	1.0415	2238	2124	2292	2154	1938	2190	2064	2184	0.0063396	0.0055176	2304	0.0067622	1.377	2.7301	0.39454
untreated-a	5786	5811	5844	1.4467	0.88565	2.1433	1.2754	1362	1260	1416	1308	1074	1332	1212	1326	0.0069455	0.0057672	1422	0.0068927	1.3144	2.2876	0.35306
untreated-a	5815	5847	5866	1.5096	0.62317	2.2809	0.88023	1506	1368	1560	1416	1218	1458	1338	1452	0.0068342	0.0054954	1584	0.0068489	1.1834	2.653	0.412
untreated-a	5815	5847	5867	1.5109	0.62317	2.35	0.88023	1506	1368	1566	1416	1218	1458	1338	1452	0.0068342	0.0054954	1572	0.0067885	1.0553	2.4743	0.4689
untreated-a	5848	5871	5886	1.4459	0.7551	1.8217	1.0774	1608	1506	1632	1548	1338	1572	1476	1566	0.0071841	0.0057151	1662	0.0066996	1.2528	2.2836	0.39843
untreated-a	5847	5866	5891	1.7608	0.75478	2.0834	1.1405	1632	1506	1680	1560	1338	1590	1458	1584	0.0068489	0.0068342	1698	0.0051318	1.252	2.2609	0.37163
untreated-a	5848	5870	5895	1.6982	0.75205	2.4693	1.1088	1602	1500	1650	1548	1338	1590	1476	1584	0.0075223	0.0057151	1668	0.0074072	1.6387	2.8015	0.45947
untreated-a	6480	6490	6510	1.4385	0.71927	1.763	1.1459	1716	1620	1740	1674	1488	1698	1584	1692	0.0082958	0.0078871	1806	0.0065238	1.4475	2.7491	0.49333
untreated-a	6480	6490	6511	1.6991	0.71927	2.5469	1.1459	1740	1620	1800	1674	1488	1698	1584	1692	0.0082958	0.0078871	1812	0.0070805	1.3225	2.7874	0.47165
untreated-a	6480	6491	6512	1.6414	0.81709	2.2814	1.3891	1734	1632	1776	1692	1488	1698	1584	1692	0.0075272	0.0078871	1788	0.0072184	1.3852	2.5508	0.45347
untreated-a	6491	6512	6525	1.7532	0.8207	2.405	1.1407	1860	1734	1896	1776	1584	1794	1698	1788	0.0072184	0.0075272	1896	0.0066059	1.3125	2.405	0.41248
untreated-a	6491	6512	6526	1.514	0.8207	2.2817	1.1407	1842	1734	1896	1776	1584	1794	1698	1788	0.0072184	0.0075272	1908	0.006934	1.1786	2.4739	0.41011
untreated-a	6512	6525	6550	1.5137	0.87662	2.1566	1.2025	1950	1860	1998	1896	1698	1902	1794	1896	0.0066059	0.0072184	2022	0.0071049	1.0518	2.5923	0.46382
untreated-a	6512	6526	6553	1.5086	0.75699	2.0856	1.1409	1956	1842	2010	1896	1698	1914	1794	1908	0.006934	0.0072184	2022	0.0062668	1.1785	2.3468	0.40145
untreated-a	6525	6550	6573	1.4434	0.75683	2.4625	1.0783	2046	1950	2106	1998	1794	2028	1902	2022	0.0071049	0.0066059	2136	0.0083553	1.186	2.9946	0.38679
untreated-a	8651	8670	8704	1.7011	0.8525	2.0132	1.1078	1536	1416	1560	1458	1272	1488	1368	1482	0.0060495	0.0074228	1590	0.0074907	1.1878	2.5416	0.41353
untreated-a	81	90	107	2.4078	1.1063	3.1212	1.4644	1098	960	1152	1014	822	1032	918	1026	0.0053683	0.007357	1164	0.0050695	1.7683	3.3655	0.47542
untreated-a	81	90	108	1.8903	1.1063	2.6593	1.4644	1092	960	1146	1014	822	1032	918	1026	0.0053683	0.007357	1164	0.005959	1.3127	2.9795	0.51482
untreated-a	90	107	121	2.2273	1.2039	2.7327	1.5606	1242	1098	1290	1152	918	1170	1032	1164	0.0050695	0.0053683	1308	0.0041142	1.7665	3.1321	0.5462
untreated-a	90	107	123	1.9579	1.2039	2.9213	1.5606	1218	1098	1278	1152	918	1170	1032	1164	0.0050695	0.0053683	1290	0.0065756	1.5117	3.129	0.52036
untreated-a	90	108	124	2.0918	0.94514	2.7324	1.3296	1224	1092	1278	1146	918	1170	1032	1164	0.005959	0.0053683	1290	0.0050786	1.5671	2.9244	0.55613
untreated-a	107	121	133	1.8961	1.1136	2.5313	1.3664	1374	1242	1422	1290	1032	1314	1170	1308	0.0041142	0.0050695	1458	0.0056102	1.4378	3.1335	0.53188
untreated-a	107	121	134	2.1583	1.1136	2.9236	1.3664	1368	1242	1416	1290	1032	1314	1170	1308	0.0041142	0.0050695	1434	0.0061375	1.6414	3.313	0.53661
untreated-a	121	134	141	2.1602	1.0791	2.8058	1.4618	1482	1368	1524	1416	1170	1440	1314	1434	0.0061375	0.0041142	1542	0.0064876	1.7029	3.2401	0.54408
untreated-a	121	133	145	2.0899	0.94803	2.8621	1.2657	1512	1374	1566	1422	1170	1464	1314	1458	0.0056102	0.0041142	1578	0.0056188	1.7054	3.0647	0.53598
untreated-a	121	133	146	1.7	0.94803	2.4177	1.2657	1488	1374	1548	1422	1170	1464	1314	1458	0.0056102	0.0041142	1578	0.0059441	1.441	2.8004	0.51223
untreated-a	134	141	148	2.1637	1.0801	2.9924	1.4029	1590	1482	1632	1524	1314	1548	1440	1542	0.0064876	0.0061375	1644	0.0071684	1.6347	3.3122	0.47935
untreated-a	133	145	154	1.7038	1.045	2.2125	1.431	1626	1512	1668	1566	1314	1584	1464	1578	0.0056188	0.0056102	1704	0.00591	1.5114	2.8608	0.52413
untreated-a	133	146	155	1.7047	0.85	2.4132	1.2089	1620	1488	1674	1548	1314	1584	1464	1578	0.0059441	0.0056102	1704	0.0060683	1.3813	2.7263	0.44546
untreated-a	145	154	163	1.9003	0.8519	2.484	1.1063	1752	1626	1794	1668	1464	1710	1584	1704	0.00591	0.0056188	1824	0.0064979	1.5715	3.2051	0.52889
untreated-a	152	161	176	1.6955	1.0799	2.4748	1.3929	1854	1752	1908	1800	1584	1824	1698	1818	0.0054267	0.0058866	1944	0.0068957	1.5117	3.3087	0.51437
untreated-a	161	176	188	1.7015	0.84777	2.3496	1.2374	1968	1854	2028	1908	1698	1950	1824	1944	0.0068957	0.0054267	2052	0.0062194	1.5123	2.8612	0.5368
untreated-a	175	185	198	1.7066	0.98091	2.4303	1.268	2112	1974	2166	2022	1824	2058	1944	2052	0.0058117	0.0056301	2190	0.0056299	1.5068	2.8052	0.49159
untreated-a	175	185	199	1.767	0.98091	2.4736	1.268	2088	1974	2148	2022	1824	2058	1944	2052	0.0058117	0.0056301	2172	0.0055765	1.5737	2.9061	0.5261
untreated-a	176	188	201	1.7621	0.85077	2.4769	1.1748	2082	1968	2142	2028	1824	2058	1950	2052	0.0062194	0.0068957	2160	0.0054309	1.4466	2.6703	0.55211
untreated-a	185	198	211	1.6345	0.85331	2.3381	1.2151	2238	2112	2298	2166	1944	2196	2058	2190	0.0056299	0.0058117	2328	0.0055903	1.446	2.857	0.48536
untreated-a	305	314	331	2.4078	1.1063	3.1212	1.4644	1098	960	1152	1014	822	1032	918	1026	0.0053683	0.007357	1164	0.0050695	1.7683	3.3655	0.47542
untreated-a	305	314	332	1.8903	1.1063	2.6593	1.4644	1092	960	1146	1014	822	1032	918	1026	0.0053683	0.007357	1164	0.005959	1.3127	2.9795	0.51482
untreated-a	314	331	345	2.2273	1.2039	2.7327	1.5606	1242	1098	1290	1152	918	1170	1032	1164	0.0050695	0.0053683	1308	0.0041142	1.7665	3.1321	0.5462
untreated-a	314	331	347	1.9579	1.2039	2.9213	1.5606	1218	1098	1278	1152	918	1170	1032	1164	0.0050695	0.0053683	1290	0.0065756	1.5117	3.129	0.52036
untreated-a	314	332	348	2.0918	0.94514	2.7324	1.3296	1224	1092	1278	1146	918	1170	1032	1164	0.005959	0.0053683	1290	0.0050786	1.5671	2.9244	0.55613
untreated-a	331	345	357	1.8961	1.1136	2.5313	1.3664	1374	1242	1422	1290	1032	1314	1170	1308	0.0041142	0.0050695	1458	0.0056102	1.4378	3.1335	0.53188
untreated-a	331	345	358	2.1583	1.1136	2.9236	1.3664	1368	1242	1416	1290	1032	1314	1170	1308	0.0041142	0.0050695	1434	0.0061375	1.6414	3.313	0.53661
untreated-a	345	358	365	2.1602	1.0791	2.8058	1.4618	1482	1368	1524	1416	1170	1440	1314	1434	0.0061375	0.0041142	1542	0.0064876	1.7029	3.2401	0.54408
untreated-a	345	357	369	2.0899	0.94803	2.8621	1.2657	1512	1374	1566	1422	1170	1464	1314	1458	0.0056102	0.0041142	1578	0.0056188	1.7054	3.0647	0.53598
untreated-a	345	357	370	1.7	0.94803	2.4177	1.2657	1488	1374	1548	1422	1170	1464	1314	1458	0.0056102	0.0041142	1578	0.0059441	1.441	2.8004	0.51223
untreated-a	358	365	372	2.1637	1.0801	2.9924	1.4029	1590	1482	1632	1524	1314	1548	1440	1542	0.0064876	0.0061375	1644	0.0071684	1.6347	3.3122	0.47935
untreated-a	357	369	378	1.7038	1.045	2.2125	1.431	1626	1512	1668	1566	1314	1584	1464	1578	0.0056188	0.0056102	1704	0.00591	1.5114	2.8608	0.52413
untreated-a	357	370	379	1.7047	0.85	2.4132	1.2089	1620	1488	1674	1548	1314	1584	1464	1578	0.0059441	0.0056102	1704	0.0060683	1.3813	2.7263	0.44546
untreated-a	369	378	387	1.9003	0.8519	2.484	1.1063	1752	1626	1794	1668	1464	1710	1584	1704	0.00591	0.0056188	1824	0.0064979	1.5715	3.2051	0.52889
untreated-a	376	385	400	1.6955	1.0799	2.4748	1.3929	1854	1752	1908	1800	1584	1824	1698	1818	0.0054267	0.0058866	1944	0.0068957	1.5117	3.3087	0.51437
untreated-a	385	400	412	1.7015	0.84777	2.3496	1.2374	1968	1854	2028	1908	1698	1950	1824	1944	0.0068957	0.0054267	2052	0.0062194	1.5123	2.8612	0.5368
untreated-a	399	409	422	1.7066	0.98091	2.4303	1.268	2112	1974	2166	2022	1824	2058	1944	2052	0.0058117	0.0056301	2190	0.0056299	1.5068	2.8052	0.49159
untreated-a	399	409	423	1.767	0.98091	2.4736	1.268	2088	1974	2148	2022	1824	2058	1944	2052	0.0058117	0.0056301	2172	0.0055765	1.5737	2.9061	0.5261
untreated-a	400	412	425	1.7621	0.85077	2.4769	1.1748	2082	1968	2142	2028	1824	2058	1950	2052	0.0062194	0.0068957	2160	0.0054309	1.4466	2.6703	0.55211
untreated-a	409	422	435	1.6345	0.85331	2.3381	1.2151	2238	2112	2298	2166	1944	2196	2058	2190	0.0056299	0.0058117	2328	0.0055903	1.446	2.857	0.48536
untreated-a	752	785	825	2.0271	1.0151	2.8613	1.3055	2190	2064	2238	2112	1836	2154	1980	2148	0.0055885		2274	0.0069941	1.5685	3.5789	0.36185
untreated-a	1052	1072	1092	1.7753	0.75554	2.476	1.3053	1278	1092	1314	1182	942	1206	1068	1200	0.0061707	0.0055462	1350	0.0070934	1.3158	3.254	0.3519
untreated-a	1072	1092	1104	1.83	0.88765	2.478	1.238	1380	1278	1428	1314	1068	1356	1206	1350	0.0070934	0.0061707	1464	0.0060708	1.6382	3.0641	0.40703
untreated-a	1072	1092	1105	1.8343	0.88765	2.1649	1.238	1392	1278	1434	1314	1068	1356	1206	1350	0.0070934	0.0061707	1494	0.0054363	1.5809	3.1959	0.37084
untreated-a	1077	1096	1108	1.7052	0.91555	2.4824	1.3006	1386	1266	1440	1332	1074	1362	1230	1356	0.0053265	0.0058618	1458	0.0066184	1.5765	2.8073	0.4054
untreated-a	1096	1108	1122	1.9613	0.8526	2.5346	1.2412	1518	1386	1560	1440	1230	1464	1362	1458	0.0066184	0.0053265	1602	0.0064477	1.3756	3.3844	0.41103
untreated-a	1092	1105	1136	1.8319	0.91717	2.2227	1.0825	1518	1392	1548	1434	1206	1500	1356	1494	0.0054363	0.0070934	1596	0.0060356	1.6336	2.9257	0.39858
untreated-a	1092	1105	1137	1.5979	0.91717	2.0292	1.0825	1494	1392	1548	1434	1206	1500	1356	1494	0.0054363	0.0070934	1578	0.0071312	1.5064	2.5971	0.41177
untreated-a	1105	1137	1145	1.3778	0.79896	2.0233	1.0146	1602	1494	1662	1548	1356	1584	1500	1578	0.0071312	0.0054363	1686	0.0064152	1.2554	2.3485	0.48075
untreated-a	1105	1136	1148	1.5718	0.91595	2.4146	1.1114	1608	1518	1662	1548	1356	1602	1500	1596	0.0060356	0.0054363	1692	0.0071469	1.5757	2.8653	0.40025
untreated-a	1105	1136	1149	1.3825	0.91595	2.2154	1.1114	1602	1518	1662	1548	1356	1602	1500	1596	0.0060356	0.0054363	1692	0.0077354	1.3825	2.6076	0.46674
untreated-a	1136	1148	1164	1.8296	0.78589	2.3485	1.2073	1734	1608	1782	1662	1500	1698	1602	1692	0.0071469	0.0060356	1818	0.0060969	1.5116	3.058	0.43836
untreated-a	1136	1148	1165	1.4447	0.78589	2.1536	1.2073	1716	1608	1770	1662	1500	1698	1602	1692	0.0071469	0.0060356	1812	0.0072182	1.4481	2.928	0.54159
untreated-a	1148	1165	1179	1.4391	0.72236	2.1583	1.0768	1824	1716	1878	1770	1602	1818	1698	1812	0.0072182	0.0071469	1914	0.0072957	1.3088	2.7912	0.45644
untreated-a	1148	1164	1182	1.8349	0.9148	2.2054	1.1743	1848	1734	1890	1782	1602	1824	1698	1818	0.0060969	0.0071469	1926	0.0050121	1.6352	2.726	0.55928
untreated-a	1148	1164	1183	1.4405	0.9148	1.8295	1.1743	1836	1734	1890	1782	1602	1824	1698	1818	0.0060969	0.0071469	1926	0.005536	1.4435	2.5336	0.38705
untreated-a	1156	1169	1184	1.7105	0.91698	2.4119	1.2722	1878	1758	1926	1818	1620	1842	1710	1836	0.0063693	0.0079546	1944	0.006105	1.4416	2.7264	0.49245
untreated-a	1156	1170	1188	1.5702	0.85128	2.1524	1.1125	1872	1764	1920	1806	1620	1860	1710	1854	0.0063823	0.0079546	1980	0.0062412	1.5063	3.1782	0.40535
untreated-a	1156	1170	1189	1.6347	0.85128	2.4045	1.1125	1872	1764	1920	1806	1620	1860	1710	1854	0.0063823	0.0079546	1944	0.0080337	1.507	3.0092	0.48096
untreated-a	1164	1183	1194	1.1875	0.72026	1.7691	0.91473	1950	1836	1998	1890	1698	1932	1824	1926	0.005536	0.0060969	2022	0.0093142	1.0483	2.3328	0.39619
untreated-a	1164	1182	1195	1.2486	0.91744	2.0129	1.1027	1950	1848	2004	1890	1698	1932	1824	1926	0.0050121	0.0060969	2058	0.0068189	1.1801	2.8532	0.44992
untreated-a	1164	1182	1196	1.5103	0.91744	2.1583	1.1027	1950	1848	1998	1890	1698	1932	1824	1926	0.0050121	0.0060969	2040	0.0070001	1.5084	2.9864	0.50696
untreated-a	1164	1183	1197	1.6428	0.72026	2.227	0.91473	1950	1836	2010	1890	1698	1932	1824	1926	0.005536	0.0060969	2022	0.0053913	1.3823	2.346	0.4406
untreated-a	1170	1188	1206	1.7678	0.78508	2.7294	1.0762	1992	1872	2058	1920	1710	1986	1860	1980	0.0062412	0.0063823	2070	0.0061365	1.7006	2.9324	0.41239
untreated-a	1183	1194	1212	1.639	0.59373	2.2922	0.88457	2064	1950	2112	1998	1824	2028	1932	2022	0.0093142	0.005536	2136	0.0082322	1.1862	2.9263	0.31659
untreated-a	1183	1197	1214	1.4459	0.82142	1.9583	1.1135	2076	1950	2130	2010	1824	2028	1932	2022	0.0053913	0.005536	2160	0.0058083	1.2498	2.6041	0.41586
untreated-a	1183	1197	1215	1.5728	0.82142	2.0936	1.1135	2088	1950	2136	2010	1824	2028	1932	2022	0.0053913	0.005536	2154	0.0059574	1.0436	2.3553	0.29814
untreated-a	1188	1206	1222	1.838	0.8839	2.5405	1.3647	2136	1992	2190	2058	1860	2076	1986	2070	0.0061365	0.0062412	2214	0.0055749	1.3806	2.9842	0.41024
untreated-a	1194	1212	1231	1.574	0.81948	2.3544	1.1461	2184	2064	2244	2112	1932	2142	2028	2136	0.0082322	0.0093142	2268	0.0065155	1.1781	2.6767	0.37381
untreated-a	1197	1215	1233	1.704	0.78639	2.6104	1.0468	2226	2088	2304	2136	1932	2160	2028	2154	0.0059574	0.0053913	2310	0.0062172	1.1221	2.7903	0.47339
untreated-a	1206	1222	1238	2.0226	0.91901	2.9333	1.2702	2280	2136	2352	2190	1986	2220	2076	2214	0.0055749	0.0061365	2370	0.0055744	1.4544	3.249	0.40653
untreated-a	1206	1222	1239	1.7704	0.91901	2.5356	1.2702	2256	2136	2310	2190	1986	2220	2076	2214	0.0055749	0.0061365	2340	0.0061676	1.505	2.9961	0.44454
untreated-a	1498	1517	1538	1.7631	0.71997	2.612	1.3676	852	714	900	786	606	792	702	786	0.0075339	0.0083846	930	0.0068237	1.2488	3.1204	0.44948
untreated-a	1518	1556	1593	1.7683	0.94709	2.6162	1.3053	1026	894	1092	954	702	984	846	978	0.0057088	0.005147	1110	0.006305	1.3751	2.9903	0.4806
untreated-a	1664	1685	1711	1.6329	0.78702	2.214	1.1105	1590	1464	1644	1518	1284	1542	1416	1536	0.0056537	0.0061102	1668	0.0062844	1.3077	2.7278	0.45333
untreated-a	1798	1846	1867	1.7661	0.81699	2.5451	1.1778	2136	1998	2190	2058	1830	2094	1974	2088	0.0060098	0.0052358	2214	0.0061967	1.3809	2.9222	0.47978
untreated-a	1798	1846	1868	1.8321	0.81699	2.4807	1.1778	2154	1998	2202	2058	1830	2094	1974	2088	0.0060098	0.0052358	2238	0.0059952	1.3853	3.0543	0.48794
untreated-a	1846	1868	1901	1.8306	0.91607	2.162	1.2403	2286	2154	2316	2202	1974	2244	2094	2238	0.0059952	0.0060098	2364	0.0052721	1.5095	2.8584	0.47961
untreated-a	2333	2350	2370	1.702	0.75155	2.1566	1.2354	1632	1488	1680	1554	1344	1572	1452	1566	0.0065368	0.0073413	1704	0.0053342	1.3851	2.5948	0.42543
untreated-a	2332	2361	2375	1.7699	0.68858	2.2927	1.1102	1620	1494	1674	1554	1344	1584	1482	1578	0.0080372	0.0075503	1698	0.0067638	1.2486	2.8625	0.47038
untreated-a	2361	2375	2403	1.7683	0.88495	2.802	1.1464	1734	1620	1794	1674	1482	1704	1584	1698	0.0067638	0.0080372	1806	0.0076687	1.3839	2.9895	0.45694
untreated-a	2350	2370	2404	1.7667	0.85099	2.2816	1.0783	1740	1632	1776	1680	1452	1710	1572	1704	0.0053342	0.0065368	1794	0.0097949	1.1791	2.6671	0.47879
untreated-a	2350	2370	2405	1.5072	0.85099	2.0199	1.0783	1752	1632	1800	1680	1452	1710	1572	1704	0.0053342	0.0065368	1830	0.0058138	1.2499	2.5503	0.40859
untreated-a	2370	2404	2419	1.6351	0.88333	2.3437	1.1408	1830	1740	1878	1776	1572	1800	1710	1794	0.0097949	0.0053342	1890	0.0077466	1.3817	2.7331	0.45217
untreated-a	3980	4006	4027	1.5073	0.81906	2.4071	1.2032	1014	906	1074	960	756	972	870	966	0.0074234	0.007087	1074	0.0074228	1.1861	2.4071	0.40835
untreated-a	3980	4006	4029	1.5739	0.81906	2.3507	1.2032	1020	906	1074	960	756	972	870	966	0.0074234	0.007087	1080	0.0067273	1.1853	2.4117	0.35899
untreated-a	101	112	126	1.7691	0.78596	2.6119	1.143	822	708	876	756	600	798	708	792	0.0070692	0.0087636	906	0.0071517	1.4475	3.2477	0.58429
untreated-a	112	126	138	2.0938	0.88453	2.8061	1.3059	972	822	1020	876	708	912	798	906	0.0071517	0.0070692	1038	0.0058438	1.7049	3.2429	0.54318
untreated-a	417	428	442	1.7691	0.78596	2.6119	1.143	822	708	876	756	600	798	708	792	0.0070692	0.0087636	906	0.0071517	1.4475	3.2477	0.58429
untreated-a	428	442	454	2.0938	0.88453	2.8061	1.3059	972	822	1020	876	708	912	798	906	0.0071517	0.0070692	1038	0.0058438	1.7049	3.2429	0.54318
untreated-a	947	971	984	1.5762	0.75531	2.3511	0.98206	1836	1716	1890	1758	1602	1800	1704	1794	0.0065805	0.0070841	1908	0.0073123	1.251	2.7298	0.56874
untreated-a	947	972	988	1.466	0.8508	2.145	1.2088	1806	1728	1860	1776	1602	1818	1704	1812	0.0066808	0.0070841	1884	0.0077673	1.5047	2.5532	0.56488
untreated-a	971	984	998	1.639	0.78812	2.2918	1.1755	1938	1836	1986	1890	1704	1914	1800	1908	0.0073123	0.0065805	2010	0.007458	1.5098	2.9346	0.53436
untreated-a	971	984	999	1.5085	0.78812	2.1445	1.1755	1932	1836	1980	1890	1704	1914	1800	1908	0.0073123	0.0065805	2010	0.0072715	1.3125	2.6731	0.50037
untreated-a	984	998	1015	1.5029	0.81949	2.2193	1.1459	2034	1938	2088	1986	1800	2016	1914	2010	0.007458	0.0073123	2124	0.0073605	1.3153	2.9968	0.52574
untreated-a	984	999	1016	1.4402	0.75426	2.1567	1.0723	2028	1932	2088	1980	1800	2016	1914	2010	0.0072715	0.0073123	2130	0.0066948	1.3753	2.8635	0.53003
untreated-a	999	1016	1032	1.8334	0.72012	2.2875	1.0784	2178	2028	2220	2088	1914	2136	2016	2130	0.0066948	0.0072715	2250	0.0063792	1.4424	2.9954	0.53206
untreated-a	999	1016	1033	1.5045	0.72012	2.0249	1.0784	2166	2028	2214	2088	1914	2136	2016	2130	0.0066948	0.0072715	2262	0.0061591	1.3094	2.789	0.52526
untreated-a	1016	1033	1054	1.5658	0.75224	2.2278	1.0125	2304	2166	2352	2214	2016	2268	2136	2262	0.0061591	0.0066948	2394	0.0062529	1.4367	2.9337	0.54388
untreated-a	1016	1033	1055	1.9636	0.75224	2.3468	1.0125	2334	2166	2364	2214	2016	2268	2136	2262	0.0061591	0.0066948	2382	0.0067554	1.2454	2.7251	0.47705
untreated-a	1407	1421	1445	1.9557	0.9476	2.5443	1.336	2256	2112	2310	2166	1926	2184	2040	2178	0.0062352	0.0061514	2352	0.0047418	1.5076	3.2318	0.5148
untreated-a	1875	1896	1916	1.7026	1.1079	2.4813	1.4025	1230	1140	1272	1176	948	1200	1086	1194	0.0065025	0.0062263	1296	0.0082537	1.3755	2.9905	0.49225
untreated-a	1875	1897	1917	1.5138	0.8177	2.1595	1.1749	1212	1110	1272	1164	948	1200	1086	1194	0.0064257	0.0062263	1308	0.0057082	1.4476	2.6156	0.54171
untreated-a	1875	1897	1918	1.7657	0.8177	2.4819	1.1749	1242	1110	1296	1164	948	1200	1086	1194	0.0064257	0.0062263	1326	0.0060535	1.3785	3.0013	0.55065
untreated-a	1897	1918	1939	1.8286	0.88286	2.5367	1.2409	1356	1242	1410	1296	1086	1332	1200	1326	0.0060535	0.0064257	1440	0.0062167	1.6447	3.1242	0.51551
untreated-a	1897	1918	1940	1.7027	0.88286	2.342	1.2409	1380	1242	1428	1296	1086	1332	1200	1326	0.0060535	0.0064257	1476	0.0060574	1.3747	3.2027	0.51581
untreated-a	1918	1939	1957	2.0344	0.91428	2.7953	1.2684	1488	1356	1542	1410	1200	1446	1332	1440	0.0062167	0.0060535	1560	0.0059923	1.5714	3.1978	0.52702
untreated-a	1918	1939	1958	1.957	0.91428	2.6055	1.2684	1482	1356	1530	1410	1200	1446	1332	1440	0.0062167	0.0060535	1554	0.0070246	1.5053	3.1932	0.5211
untreated-a	1918	1940	1961	2.0276	0.85134	2.6661	1.171	1512	1380	1566	1428	1200	1482	1332	1476	0.0060574	0.0060535	1578	0.0059878	1.6331	2.9203	0.49086
untreated-a	1939	1958	1969	1.8973	0.97848	2.9357	1.3028	1578	1482	1638	1530	1332	1560	1446	1554	0.0070246	0.0062167	1644	0.0072891	1.6385	3.0574	0.49632
untreated-a	1940	1961	1976	1.4377	1.0138	2.149	1.333	1614	1512	1668	1566	1332	1584	1482	1578	0.0059878	0.0060574	1740	0.0061906	1.3166	3.2575	0.53575
untreated-a	1958	1969	1981	2.0882	0.94863	2.7997	1.4678	1698	1578	1746	1638	1446	1650	1560	1644	0.0072891	0.0070246	1758	0.00605	1.5773	3.111	0.49515
untreated-a	1958	1969	1982	2.0913	0.94863	2.8678	1.4678	1698	1578	1746	1638	1446	1650	1560	1644	0.0072891	0.0070246	1776	0.0065943	1.5746	3.5091	0.50483
untreated-a	1961	1976	1998	1.6287	0.71883	2.4806	1.0745	1740	1614	1800	1668	1482	1746	1584	1740	0.0061906	0.0059878	1824	0.0074761	1.6401	2.9327	0.52787
untreated-a	1969	1982	2007	2.3429	1.0456	3.1075	1.4339	1812	1698	1854	1746	1560	1782	1650	1776	0.0065943	0.0072891	1872	0.0063421	1.9571	3.5079	0.51118
untreated-a	1969	1982	2008	1.895	1.0456	2.743	1.4339	1806	1698	1866	1746	1560	1782	1650	1776	0.0065943	0.0072891	1884	0.0062871	1.6407	2.9222	0.38304
untreated-a	1982	2007	2021	2.2176	1.1714	2.976	1.5537	1902	1812	1944	1854	1650	1878	1782	1872	0.0063421	0.0065943	1962	0.0062619	1.9575	3.2519	0.46032
untreated-a	2035	2060	2074	1.9002	0.95032	2.6095	1.3396	2232	2130	2274	2184	1962	2226	2106	2220	0.0063625	0.0063807	2298	0.0074523	1.8328	3.0517	0.43715
untreated-a	2274	2285	2302	1.696	0.91561	2.6063	1.2396	1386	1290	1434	1338	1140	1380	1242	1374	0.0060967	0.0054972	1440	0.0082322	1.6416	2.6707	0.39675
untreated-a	2284	2300	2311	1.7058	0.78868	2.4032	1.1365	1542	1410	1590	1464	1242	1506	1374	1500	0.0057985	0.0068953	1620	0.0069256	1.4438	2.995	0.48496
untreated-a	2284	2300	2314	1.6395	0.78868	2.4647	1.1365	1536	1410	1590	1464	1242	1506	1374	1500	0.0057985	0.0068953	1614	0.0073285	1.3814	2.9251	0.48025
untreated-a	2299	2312	2331	1.7676	0.88286	2.3388	1.1076	1644	1518	1692	1572	1374	1608	1506	1602	0.0050508	0.0053852	1722	0.0065909	1.4434	2.9927	0.47777
untreated-a	2299	2312	2332	1.4433	0.88286	2.3404	1.1076	1644	1518	1710	1572	1374	1608	1506	1602	0.0050508	0.0053852	1716	0.00669	1.2477	2.4254	0.52991
untreated-a	2300	2311	2336	1.824	0.85288	2.5462	1.2016	1662	1542	1716	1590	1374	1626	1506	1620	0.0069256	0.0057985	1746	0.0066499	1.5075	3.1839	0.43165
untreated-a	2300	2311	2337	2.1437	0.85288	2.7334	1.2016	1698	1542	1740	1590	1374	1626	1506	1620	0.0069256	0.0057985	1770	0.0055074	1.5095	3.3138	0.48266
untreated-a	2312	2332	2347	1.765	0.72166	2.4568	1.1702	1776	1644	1818	1710	1506	1722	1608	1716	0.00669	0.0050508	1842	0.0076323	1.2518	3.0425	0.47492
untreated-a	2312	2331	2349	1.3065	0.88382	2.153	1.1694	1734	1644	1788	1692	1506	1728	1608	1722	0.0065909	0.0050508	1812	0.0080052	1.2439	2.4869	0.54005
untreated-a	2311	2336	2354	2.01	0.91201	2.5501	1.2731	1794	1662	1836	1716	1506	1752	1626	1746	0.0066499	0.0069256	1872	0.00602	1.6451	3.2607	0.45232
untreated-a	2311	2336	2355	1.7032	0.91201	2.2146	1.2731	1800	1662	1842	1716	1506	1752	1626	1746	0.0066499	0.0069256	1878	0.00595	1.4488	2.8614	0.45304
untreated-a	2311	2337	2356	1.572	1.0718	2.4725	1.3667	1788	1698	1860	1740	1506	1776	1626	1770	0.0055074	0.0069256	1896	0.0053039	1.5056	2.597	0.42678
untreated-a	2332	2347	2361	1.9604	0.8825	2.7318	1.2284	1902	1776	1956	1818	1608	1848	1722	1842	0.0076323	0.00669	1974	0.0067053	1.3112	3.1698	0.47808
untreated-a	2336	2354	2364	1.7632	1.005	2.3976	1.2751	1902	1794	1950	1836	1626	1878	1752	1872	0.00602	0.0066499	1980	0.0062578	1.6384	2.9734	0.40969
untreated-a	2336	2354	2365	1.8931	1.005	2.48	1.2751	1908	1794	1956	1836	1626	1878	1752	1872	0.00602	0.0066499	1980	0.0060997	1.7027	3.0044	0.47803
untreated-a	2347	2361	2377	1.8234	0.98021	2.6051	1.3659	2016	1902	2070	1956	1722	1980	1848	1974	0.0067053	0.0076323	2088	0.0063461	1.5061	2.9201	0.49473
untreated-a	2354	2364	2378	1.759	0.88158	2.9895	1.1988	2016	1902	2094	1950	1752	1986	1878	1980	0.0062578	0.00602	2130	0.0065768	1.5745	3.7145	0.45194
untreated-a	2354	2365	2379	1.9018	0.94653	2.6064	1.24	2028	1908	2076	1956	1752	1986	1878	1980	0.0060997	0.00602	2112	0.0069633	1.4411	3.3834	0.44821
untreated-a	2354	2364	2380	1.7024	0.88158	2.4062	1.1988	2028	1902	2076	1950	1752	1986	1878	1980	0.0062578	0.00602	2100	0.0062851	1.4509	2.809	0.46992
untreated-a	2364	2380	2392	1.7721	0.8512	2.0808	1.2031	2154	2028	2184	2076	1878	2106	1986	2100	0.0062851	0.0062578	2220	0.0060266	1.4413	2.7782	0.45496
untreated-a	2666	2688	2704	1.5783	0.81988	2.09	1.113	1686	1548	1728	1608	1428	1644	1524	1638	0.0060514	0.0070262	1770	0.0071748	1.2428	3.058	0.51827
untreated-a	2667	2695	2707	1.9545	0.91644	2.3405	1.2032	1698	1560	1722	1614	1428	1650	1548	1644	0.0062875	0.0064698	1770	0.0062902	1.5751	3.1825	0.47452
untreated-a	2667	2695	2708	1.7639	0.91644	2.0216	1.2032	1692	1560	1716	1614	1428	1650	1548	1644	0.0062875	0.0064698	1770	0.0072007	1.3801	3.163	0.47399
untreated-a	2667	2697	2713	1.704	0.84871	2.5979	1.1722	1704	1578	1764	1632	1428	1674	1548	1668	0.0060231	0.0064698	1776	0.007021	1.5041	2.8679	0.46086
untreated-a	2667	2697	2714	1.829	0.84871	2.5953	1.1722	1716	1578	1770	1632	1428	1674	1548	1668	0.0060231	0.0064698	1800	0.0067007	1.5061	3.3132	0.47347
untreated-a	2695	2708	2725	1.6435	0.88193	2.2258	1.0108	1794	1692	1842	1716	1548	1776	1650	1770	0.0072007	0.0062875	1878	0.0062349	1.5093	2.7975	0.53034
untreated-a	2688	2704	2726	1.6357	0.78913	2.2129	1.045	1794	1686	1842	1728	1524	1776	1644	1770	0.0071748	0.0060514	1872	0.0075246	1.2456	2.8738	0.44665
untreated-a	2695	2707	2727	1.8955	0.97727	2.8648	1.1703	1824	1698	1884	1722	1548	1776	1650	1770	0.0062902	0.0062875	1908	0.006282	1.5752	3.3624	0.53533
untreated-a	2695	2708	2728	1.7593	0.88193	2.3473	1.0108	1794	1692	1842	1716	1548	1776	1650	1770	0.0072007	0.0062875	1878	0.0066713	1.5777	3.0459	0.49522
untreated-a	2697	2713	2729	2.0838	0.85202	2.7193	1.2989	1830	1704	1872	1764	1548	1782	1674	1776	0.007021	0.0060231	1896	0.0065176	1.5062	3.1725	0.42955
untreated-a	2708	2725	2743	1.5753	0.82173	2.2729	1.1129	1896	1794	1950	1842	1650	1884	1776	1878	0.0062349	0.0072007	1974	0.0072667	1.5062	2.7855	0.54257
untreated-a	2708	2725	2745	1.3778	0.82173	1.9583	1.1129	1902	1794	1956	1842	1650	1884	1776	1878	0.0062349	0.0072007	1998	0.0065102	1.2567	2.5997	0.47289
untreated-a	2708	2728	2746	1.7644	0.87963	2.4111	1.1737	1902	1794	1950	1842	1650	1884	1776	1878	0.0066713	0.0072007	1986	0.0068046	1.6349	3.1813	0.43792
untreated-a	2725	2745	2762	1.5789	0.68892	2.1596	0.97916	2040	1902	2088	1956	1776	2004	1884	1998	0.0065102	0.0062349	2118	0.0064614	1.3835	2.7967	0.48098
untreated-a	2989	2993	3004	1.8381	0.81575	2.6836	1.273	1158	1044	1206	1098	936	1116	1032	1110	0.0076994	0.0066617	1224	0.0075582	1.4446	3.1175	0.45026
untreated-a	2993	3004	3015	1.8948	0.91904	2.661	1.3418	1260	1158	1308	1206	1032	1230	1116	1224	0.0075582	0.0076994	1332	0.006957	1.5699	3.1947	0.44798
untreated-a	3352	3383	3405	1.6334	0.81519	2.1471	1.1711	930	816	972	864	666	894	786	888	0.0070844	0.0067413	1002	0.0066282	1.311	2.6709	0.48944
untreated-a	3384	3409	3436	1.5714	0.78595	2.3526	1.1752	1026	912	1086	966	786	1008	900	1002	0.0069605	0.0062638	1110	0.0064995	1.3783	2.7473	0.45847
untreated-a	3432	3462	3484	1.8961	0.91346	2.6646	1.2655	1266	1152	1314	1206	996	1236	1122	1230	0.0063095	0.0064936	1332	0.0081545	1.309	2.9983	0.46891
untreated-a	3457	3483	3509	2.0312	0.81767	2.672	1.1433	1422	1260	1470	1314	1110	1350	1236	1344	0.0062852	0.0068321	1494	0.0060865	1.3776	3.2478	0.44907
untreated-a	3483	3509	3540	1.9633	1.0156	2.6138	1.336	1536	1422	1584	1470	1236	1500	1350	1494	0.0060865	0.0062852	1608	0.0069324	1.5111	3.2478	0.51794
untreated-a	3508	3538	3562	1.6358	0.82079	2.3527	1.2087	1638	1524	1692	1578	1350	1614	1494	1608	0.0069676	0.005804	1716	0.0067265	1.3782	2.8452	0.48074
untreated-a	3509	3540	3565	1.7035	0.98166	2.4233	1.3069	1626	1536	1674	1584	1350	1614	1500	1608	0.0069324	0.0060865	1692	0.007171	1.697	2.8583	0.48841
untreated-a	3538	3562	3577	2.1499	0.81792	2.8037	1.1763	1788	1638	1842	1692	1494	1722	1614	1716	0.0067265	0.0069676	1878	0.0058948	1.4502	3.6775	0.45396
untreated-a	4441	4468	4473	1.3145	0.69165	2.0239	0.98008	1614	1506	1668	1554	1356	1584	1494	1578	0.0073606	0.0051805	1680	0.0078134	1.127	2.2863	0.44759
untreated-a	4440	4459	4482	2.0268	0.95042	2.8029	1.3353	1656	1518	1704	1566	1356	1602	1470	1596	0.0063571	0.0060896	1728	0.006237	1.5763	3.3099	0.34797
untreated-a	4459	4482	4499	1.703	1.0134	2.2769	1.4015	1752	1656	1812	1704	1470	1734	1602	1728	0.006237	0.0063571	1830	0.0054776	1.5077	2.6715	0.4469
untreated-a	4459	4482	4500	2.2249	1.0134	2.8603	1.4015	1776	1656	1806	1704	1470	1734	1602	1728	0.006237	0.0063571	1818	0.0072591	1.6404	3.0644	0.48796
untreated-a	4482	4500	4512	2.0907	1.1125	2.9263	1.4301	1878	1776	1920	1806	1602	1824	1734	1818	0.0072591	0.006237	1950	0.007559	1.4485	3.6367	0.44468
untreated-a	4482	4499	4514	1.7629	0.8515	2.6614	1.1384	1878	1752	1932	1812	1602	1836	1734	1830	0.0054776	0.006237	1944	0.0076832	1.3762	2.9338	0.41034
untreated-a	4880	4902	4915	1.8977	0.84751	3.0716	1.2675	1512	1392	1572	1452	1260	1458	1362	1452	0.0070569	0.0066633	1578	0.0077369	1.3061	3.1945	0.49747
untreated-a	4880	4902	4916	1.7658	0.84751	2.6814	1.2675	1506	1392	1566	1452	1260	1458	1362	1452	0.0070569	0.0066633	1566	0.0070235	1.3162	2.6814	0.41165
untreated-a	4880	4901	4923	1.9586	0.85165	2.2787	1.2057	1536	1416	1560	1458	1260	1476	1362	1470	0.0069165	0.0066633	1572	0.0073698	1.3809	2.5994	0.49671
untreated-a	4902	4915	4938	2.024	0.94885	2.6799	1.5358	1614	1512	1656	1572	1362	1584	1458	1578	0.0077369	0.0070569	1674	0.0068746	1.6345	3.0598	0.47178
untreated-a	4902	4915	4939	1.5709	0.94885	1.8264	1.5358	1596	1512	1620	1572	1362	1584	1458	1578	0.0077369	0.0070569	1674	0.0071672	1.5063	2.8185	0.45109
untreated-a	4915	4938	4952	1.9666	1.012	2.6081	1.3399	1716	1614	1764	1656	1458	1680	1584	1674	0.0068746	0.0077369	1776	0.006365	1.5035	2.8768	0.44535
untreated-a	4915	4938	4953	1.8322	1.012	2.6012	1.3399	1716	1614	1764	1656	1458	1680	1584	1674	0.0068746	0.0077369	1800	0.0069429	1.5114	3.4359	0.47123
untreated-a	4938	4953	4971	1.6344	0.91609	2.4727	1.3006	1806	1716	1860	1764	1584	1806	1680	1800	0.0069429	0.0068746	1884	0.0073795	1.6344	2.9893	0.46593
untreated-a	5177	5189	5203	2.0226	0.85308	3.0531	1.1728	1050	906	1116	960	750	996	864	990	0.0060764	0.0067519	1122	0.005897	1.5088	3.2529	0.43223
untreated-a	5197	5205	5214	2.1522	0.82218	2.9891	1.1733	1236	1092	1272	1140	954	1170	1056	1164	0.0068216	0.007361	1272	0.0068154	1.5086	2.9891	0.39444
untreated-a	5205	5214	5225	1.7003	1.0761	2.2879	1.4945	1302	1236	1350	1272	1056	1278	1170	1272	0.0068154	0.0068216	1368	0.0060557	1.5719	2.6063	0.43267
untreated-a	5214	5225	5237	1.7645	0.85015	2.671	1.1439	1416	1302	1476	1350	1170	1374	1278	1368	0.0060557	0.0068154	1488	0.0066282	1.5099	2.9673	0.40493
untreated-a	5225	5237	5248	1.7089	0.88226	2.3389	1.3355	1530	1416	1578	1476	1278	1494	1374	1488	0.0066282	0.0060557	1596	0.0069195	1.3119	2.673	0.45449
untreated-a	5225	5237	5249	1.701	0.88226	2.8027	1.3355	1518	1416	1584	1476	1278	1494	1374	1488	0.0066282	0.0060557	1584	0.007175	1.5139	2.8027	0.47117
untreated-a	5237	5248	5260	2.0292	0.85443	2.7981	1.1695	1674	1530	1710	1578	1374	1602	1494	1596	0.0069195	0.0066282	1716	0.0070975	1.3797	2.9221	0.41635
untreated-a	5237	5248	5261	1.83	0.85443	2.6015	1.1695	1662	1530	1704	1578	1374	1602	1494	1596	0.0069195	0.0066282	1722	0.0074282	1.3124	2.9877	0.41913
untreated-a	5236	5251	5264	1.5116	0.81969	2.2795	1.142	1644	1530	1698	1584	1374	1614	1494	1608	0.0066222	0.0071531	1722	0.0065475	1.5123	2.7314	0.43936
untreated-a	5251	5264	5281	1.5133	0.7558	2.3546	1.1397	1764	1644	1824	1698	1494	1728	1614	1722	0.0065475	0.0066222	1830	0.0068609	1.1796	2.4679	0.50142
untreated-a	5264	5281	5289	1.6336	0.75663	2.0886	1.1773	1872	1764	1920	1824	1614	1836	1728	1830	0.0068609	0.0065475	1962	0.0060958	1.1872	2.7371	0.44433
untreated-a	5307	5316	5328	1.6981	0.81713	2.2147	1.2037	2244	2124	2280	2178	1992	2208	2094	2202	0.0070269	0.0075721	2322	0.0066577	1.3199	2.8609	0.48431
untreated-a	5307	5316	5329	1.8926	0.81713	2.7927	1.2037	2244	2124	2298	2178	1992	2208	2094	2202	0.0070269	0.0075721	2310	0.0071032	1.3715	2.918	0.46158
untreated-a	5306	5322	5334	1.641	0.82055	2.3416	1.1761	2328	2172	2370	2238	1992	2268	2142	2262	0.0060126	0.0056958	2388	0.0067841	1.3167	2.7472	0.43474
untreated-a	5306	5322	5335	1.7604	0.82055	2.3553	1.1761	2310	2172	2364	2238	1992	2268	2142	2262	0.0060126	0.0056958	2388	0.0060155	1.4416	2.9021	0.42404
untreated-a	5547	5584	5606	2.0912	0.85189	2.9398	1.1735	1008	864	1056	906	732	942	846	936	0.006723	0.0067153	1074	0.0065029	1.5079	3.4411	0.45004
untreated-a	5547	5583	5612	1.8947	0.98629	2.7286	1.3987	972	864	1032	918	732	954	846	948	0.0069189	0.0067153	1050	0.0065245	1.7027	3.2343	0.36538
untreated-a	5780	5798	5826	1.5665	0.72392	2.47	1.0129	1890	1776	1932	1818	1650	1860	1746	1854	0.0082472	0.0089452	1962	0.0089749	1.3758	3.1764	0.44396
untreated-a	5780	5798	5827	1.5713	0.72392	2.1529	1.0129	1890	1776	1932	1818	1650	1860	1746	1854	0.0082472	0.0089452	1956	0.007517	1.3176	2.5402	0.55351
untreated-a	5798	5827	5856	1.7009	0.78566	2.3445	1.0764	2028	1890	2076	1932	1746	1962	1860	1956	0.007517	0.0082472	2088	0.0065524	1.3814	2.6772	0.48101
untreated-a	6135	6165	6193	2.0261	0.82648	2.6021	1.3398	1080	924	1110	996	810	1008	930	1002	0.007768	0.0070153	1140	0.0068249	1.3194	3.1094	0.47248
untreated-a	6135	6165	6194	1.7733	0.82648	2.2874	1.3398	1062	924	1092	996	810	1008	930	1002	0.007768	0.0070153	1116	0.0061113	1.511	2.7823	0.36752
untreated-a	6165	6194	6224	1.8387	0.88667	2.5388	1.1437	1188	1062	1236	1092	930	1122	1008	1116	0.0061113	0.007768	1266	0.0066208	1.2484	3.1328	0.51651
untreated-a	6165	6194	6225	2.0209	0.88667	2.925	1.1437	1176	1062	1224	1092	930	1122	1008	1116	0.0061113	0.007768	1260	0.0069582	1.5099	3.756	0.41247
untreated-a	6165	6193	6233	1.6354	1.013	2.3483	1.3011	1158	1080	1212	1110	930	1146	1008	1140	0.0068249	0.007768	1236	0.0061517	1.5748	2.6111	0.39177
untreated-a	6165	6193	6234	2.0926	1.013	2.541	1.3011	1200	1080	1224	1110	930	1146	1008	1140	0.0068249	0.007768	1236	0.0073585	1.5053	2.86	0.43178
untreated-a	6193	6234	6259	1.8341	1.0463	2.4184	1.2705	1290	1200	1332	1224	1008	1242	1146	1236	0.0073585	0.0068249	1368	0.0082069	1.3136	3.3743	0.42902
untreated-a	6194	6224	6266	1.7751	0.91935	2.4807	1.2694	1302	1188	1344	1236	1008	1272	1122	1266	0.0066208	0.0061113	1386	0.0068017	1.5119	3.1743	0.49361
untreated-a	6194	6224	6267	2.4815	0.91935	3.716	1.2694	1344	1188	1398	1236	1008	1272	1122	1266	0.0066208	0.0061113	1398	0.0062312	1.7013	3.716	0.4928
untreated-a	265	281	292	2.0933	0.95053	2.8637	1.5259	1830	1710	1878	1776	1584	1788	1692	1782	0.0073795	0.0061442	1902	0.0069329	1.6385	3.4461	0.37175
untreated-a	262	280	298	1.9618	0.98048	2.4826	1.2408	1842	1722	1890	1764	1578	1818	1692	1812	0.0062593	0.0059332	1926	0.005591	1.5686	3.1833	0.53223
untreated-a	658	674	685	2.0933	0.95053	2.8637	1.5259	1830	1710	1878	1776	1584	1788	1692	1782	0.0073795	0.0061442	1902	0.0069329	1.6385	3.4461	0.37175
untreated-a	655	673	691	1.9618	0.98048	2.4826	1.2408	1842	1722	1890	1764	1578	1818	1692	1812	0.0062593	0.0059332	1926	0.005591	1.5686	3.1833	0.53223
untreated-a	959	985	1002	1.6344	1.0474	2.5416	1.3715	1176	1080	1236	1134	924	1158	1050	1152	0.0059683	0.0069434	1260	0.0080525	1.5721	3.2506	0.47266
untreated-a	959	986	1004	1.8294	0.85228	2.6799	1.1728	1194	1074	1248	1122	924	1164	1050	1158	0.0068723	0.0069434	1278	0.0068141	1.5083	3.3231	0.53188
untreated-a	959	986	1005	1.6372	0.85228	2.4229	1.1728	1176	1074	1242	1122	924	1164	1050	1158	0.0068723	0.0069434	1272	0.005967	1.5004	2.9319	0.50186
untreated-a	985	1002	1021	1.7059	0.8172	2.3354	1.2708	1302	1176	1362	1236	1050	1266	1158	1260	0.0080525	0.0059683	1404	0.0055985	1.5056	3.132	0.55354
untreated-a	986	1005	1025	1.7009	0.81859	2.3556	1.2115	1290	1176	1350	1242	1050	1278	1164	1272	0.005967	0.0068723	1374	0.0062979	1.5731	2.8582	0.42656
untreated-a	986	1004	1029	2.149	0.91469	2.8614	1.34	1320	1194	1368	1248	1050	1284	1164	1278	0.0068141	0.0068723	1398	0.0069866	1.638	3.6525	0.48912
untreated-a	986	1004	1030	1.8289	0.91469	2.5451	1.34	1308	1194	1356	1248	1050	1284	1164	1278	0.0068141	0.0068723	1380	0.0069932	1.5709	3.0622	0.53425
untreated-a	1004	1030	1043	1.7609	0.91447	2.5426	1.2725	1416	1308	1476	1356	1164	1386	1284	1380	0.0069932	0.0068141	1494	0.0061701	1.5761	2.932	0.56318
untreated-a	1004	1030	1044	1.5728	0.91447	2.5413	1.2725	1416	1308	1482	1356	1164	1386	1284	1380	0.0069932	0.0068141	1494	0.0070726	1.4442	2.908	0.41249
untreated-a	1004	1029	1047	2.0129	1.0745	2.6564	1.4307	1422	1320	1476	1368	1164	1404	1284	1398	0.0069866	0.0068141	1506	0.0055816	1.9617	3.3714	0.52428
untreated-a	1004	1029	1048	1.7002	1.0745	2.2764	1.4307	1410	1320	1458	1368	1164	1404	1284	1398	0.0069866	0.0068141	1494	0.0069961	1.6389	3.0454	0.50881
untreated-a	1029	1048	1064	1.96	0.85008	2.6599	1.1382	1536	1410	1578	1458	1284	1500	1404	1494	0.0069961	0.0069866	1608	0.0069539	1.5722	3.2605	0.51537
untreated-a	1029	1048	1065	1.9558	0.85008	2.6049	1.1382	1542	1410	1584	1458	1284	1500	1404	1494	0.0069961	0.0069866	1614	0.0072288	1.5101	3.3094	0.59439
untreated-a	1030	1043	1067	1.5007	0.88046	2.0317	1.2713	1512	1416	1566	1476	1284	1500	1386	1494	0.0061701	0.0069932	1602	0.0068834	1.37	2.8114	0.50208
untreated-a	1048	1064	1089	2.1501	0.97998	3.1185	1.33	1632	1536	1698	1578	1404	1614	1500	1608	0.0069539	0.0069961	1716	0.0063422	1.702	3.4551	0.56029
untreated-a	1048	1065	1093	1.7656	0.97788	2.47	1.3024	1632	1542	1680	1584	1404	1620	1500	1614	0.0072288	0.0069961	1698	0.007066	1.7091	2.8688	0.5142
untreated-a	1048	1065	1094	1.7737	0.97788	2.1469	1.3024	1632	1542	1656	1584	1404	1620	1500	1614	0.0072288	0.0069961	1698	0.0078973	1.7	3.0569	0.51907
untreated-a	1065	1094	1109	1.7676	0.88687	2.4802	1.0735	1728	1632	1776	1656	1500	1704	1620	1698	0.0078973	0.0072288	1806	0.0067404	1.5722	3.0069	0.56954
untreated-a	1065	1094	1110	1.7046	0.88687	2.4823	1.0735	1722	1632	1776	1656	1500	1704	1620	1698	0.0078973	0.0072288	1806	0.0076453	1.4388	3.1815	0.47114
untreated-a	1094	1109	1124	1.8259	0.88381	2.4808	1.2401	1854	1728	1896	1776	1620	1812	1704	1806	0.0067404	0.0078973	1920	0.0070399	1.5082	3.0714	0.55793
untreated-a	1094	1109	1125	1.8277	0.88381	2.6129	1.2401	1848	1728	1896	1776	1620	1812	1704	1806	0.0067404	0.0078973	1926	0.0068234	1.5765	3.2476	0.5728
untreated-a	1094	1110	1126	1.6991	0.85228	2.5343	1.2411	1842	1722	1890	1776	1620	1812	1704	1806	0.0076453	0.0078973	1908	0.0075144	1.3773	2.8666	0.48956
untreated-a	1109	1124	1149	1.8282	0.91297	2.4846	1.2404	1956	1854	2004	1896	1704	1926	1812	1920	0.0070399	0.0067404	2022	0.0069589	1.5066	2.939	0.562
untreated-a	1109	1125	1150	1.9569	0.91384	2.6699	1.3064	1962	1848	2010	1896	1704	1932	1812	1926	0.0068234	0.0067404	2040	0.0068931	1.6369	3.3948	0.52835
untreated-a	1109	1125	1151	1.9064	0.91384	2.7347	1.3064	1968	1848	2022	1896	1704	1932	1812	1926	0.0068234	0.0067404	2052	0.0066054	1.571	3.4421	0.43856
untreated-a	1124	1149	1164	2.1622	0.91412	2.9938	1.2423	2088	1956	2142	2004	1812	2028	1926	2022	0.0069589	0.0070399	2166	0.0060148	1.5087	3.5593	0.53222
untreated-a	1124	1149	1165	1.8331	0.91412	2.6133	1.2423	2058	1956	2106	2004	1812	2028	1926	2022	0.0069589	0.0070399	2124	0.0069626	1.4517	2.9153	0.53235
untreated-a	1125	1150	1170	1.9655	0.97844	2.7375	1.335	2076	1962	2130	2010	1812	2046	1932	2040	0.0068931	0.0068234	2154	0.0062448	1.7047	3.2996	0.5029
untreated-a	1149	1165	1176	1.9577	0.91655	2.6043	1.3067	2166	2058	2214	2106	1926	2130	2028	2124	0.0069626	0.0069589	2244	0.0065214	1.5074	3.2401	0.50319
untreated-a	1149	1165	1177	1.7639	0.91655	2.352	1.3067	2166	2058	2214	2106	1926	2130	2028	2124	0.0069626	0.0069589	2256	0.0062669	1.3746	3.1222	0.53945
untreated-a	1150	1170	1180	2.2171	0.98276	3.0082	1.3688	2238	2076	2286	2130	1932	2160	2046	2154	0.0062448	0.0068931	2304	0.0059635	1.4413	3.3864	0.47798
untreated-a	1150	1170	1181	2.2252	0.98276	2.8698	1.3688	2202	2076	2250	2130	1932	2160	2046	2154	0.0062448	0.0068931	2274	0.0054824	1.8371	3.3906	0.55845
untreated-a	1165	1177	1194	1.969	0.88197	2.2818	1.176	2304	2166	2334	2214	2028	2262	2130	2256	0.0062669	0.0069626	2364	0.0054798	1.5738	2.7469	0.55385
untreated-a	1165	1177	1195	1.7021	0.88197	2.2243	1.176	2280	2166	2334	2214	2028	2262	2130	2256	0.0062669	0.0069626	2364	0.0062433	1.505	2.9408	0.55236
untreated-a	1358	1389	1400	1.5799	0.78547	2.2166	1.1432	966	852	1026	906	690	936	828	930	0.0067872	0.0060723	1062	0.0061764	1.2444	2.735	0.57207
untreated-a	1389	1400	1421	1.8301	0.78996	2.4074	1.1083	1116	966	1158	1026	828	1068	936	1062	0.0061764	0.0067872	1200	0.0059383	1.4464	3.1147	0.57777
untreated-a	1400	1421	1433	1.5703	0.91505	2.1623	1.2037	1218	1116	1272	1158	936	1206	1068	1200	0.0059383	0.0061764	1308	0.0063992	1.442	2.7965	0.55559
untreated-a	1421	1433	1447	1.7052	0.78513	2.4153	1.0812	1344	1218	1398	1272	1068	1314	1206	1308	0.0063992	0.0059383	1428	0.0062948	1.3796	2.918	0.54776
untreated-a	1433	1447	1467	1.573	0.85262	2.2834	1.2077	1440	1344	1494	1398	1206	1434	1314	1428	0.0062948	0.0063992	1536	0.0070741	1.3798	2.9401	0.59116
untreated-a	1447	1467	1480	1.7044	0.78648	2.4768	1.1417	1560	1440	1608	1494	1314	1542	1434	1536	0.0070741	0.0062948	1638	0.0077914	1.5159	3.0672	0.57997
untreated-a	1447	1467	1481	1.7638	0.78648	2.484	1.1417	1566	1440	1614	1494	1314	1542	1434	1536	0.0070741	0.0062948	1644	0.007331	1.5778	3.2338	0.5367
untreated-a	1791	1801	1821	1.8319	0.9794	2.4063	1.3055	2166	2058	2214	2106	1902	2148	2010	2142	0.0057666	0.0054118	2244	0.0056981	1.6342	2.8579	0.56669
untreated-a	1801	1821	1829	1.9001	0.91595	2.6608	1.2031	2298	2166	2346	2214	2010	2250	2148	2244	0.0056981	0.0057666	2370	0.0058933	1.5701	3.1167	0.53539
untreated-a	1971	1979	1993	1.8323	0.94871	2.6149	1.2728	1386	1278	1440	1326	1134	1362	1248	1356	0.0071765	0.0070352	1458	0.0064508	1.7018	2.993	0.55409
untreated-a	1971	1979	1994	1.8309	0.94871	2.4895	1.2728	1380	1278	1428	1326	1134	1362	1248	1356	0.0071765	0.0070352	1464	0.0069371	1.642	3.4304	0.49302
untreated-a	1971	1978	1996	1.6389	0.85095	2.1667	1.1759	1410	1284	1458	1338	1134	1368	1248	1362	0.0059356	0.0070352	1506	0.0058123	1.3133	2.9294	0.50173
untreated-a	1971	1978	1997	1.7609	0.85095	2.4863	1.1759	1410	1284	1464	1338	1134	1368	1248	1362	0.0059356	0.0070352	1482	0.0064057	1.3768	2.9169	0.50805
untreated-a	1979	1993	1998	1.8388	0.91615	2.4736	1.3074	1500	1386	1548	1440	1248	1464	1362	1458	0.0064508	0.0071765	1584	0.0062725	1.5775	3.118	0.5245
untreated-a	1979	1993	1999	1.573	0.91615	2.0266	1.3074	1482	1386	1530	1440	1248	1464	1362	1458	0.0064508	0.0071765	1572	0.0060877	1.374	2.6673	0.55484
untreated-a	1978	1997	2002	1.6972	0.88046	2.2785	1.2432	1524	1410	1572	1464	1248	1488	1368	1482	0.0064057	0.0059356	1596	0.0066117	1.3789	2.7386	0.55522
untreated-a	1978	1997	2003	1.5756	0.88046	2.221	1.2432	1500	1410	1554	1464	1248	1488	1368	1482	0.0064057	0.0059356	1578	0.0069273	1.4428	2.7244	0.52755
untreated-a	1978	1996	2008	1.3584	0.81946	2.4872	1.0833	1494	1410	1578	1458	1248	1512	1368	1506	0.0058123	0.0059356	1602	0.0077468	1.441	3.0044	0.55669
untreated-a	1978	1996	2009	1.3791	0.81946	2.0202	1.0833	1518	1410	1566	1458	1248	1512	1368	1506	0.0058123	0.0059356	1614	0.0079715	1.3081	2.9964	0.53379
untreated-a	1997	2003	2013	1.5027	0.7878	2.0288	1.1105	1626	1500	1674	1554	1368	1584	1488	1578	0.0069273	0.0064057	1704	0.0060293	1.25	2.5395	0.60526
untreated-a	1997	2003	2015	1.5686	0.7878	2.0952	1.1105	1614	1500	1656	1554	1368	1584	1488	1578	0.0069273	0.0064057	1686	0.0067086	1.3097	2.602	0.55578
untreated-a	1996	2009	2023	1.4384	0.68956	2.3552	1.0101	1632	1518	1680	1566	1368	1620	1512	1614	0.0079715	0.0058123	1704	0.0089538	1.3751	2.7445	0.58008
untreated-a	2003	2015	2025	1.6393	0.78428	2.5394	1.0476	1740	1614	1794	1656	1488	1692	1584	1686	0.0067086	0.0069273	1800	0.0066362	1.3075	2.6164	0.53429
untreated-a	2003	2013	2031	1.6364	0.75133	2.4062	1.0144	1746	1626	1794	1674	1488	1710	1584	1704	0.0060293	0.0069273	1824	0.0076672	1.3171	3.0052	0.54805
untreated-a	2013	2031	2038	1.5697	0.81821	2.5466	1.2031	1842	1746	1914	1794	1584	1830	1710	1824	0.0076672	0.0060293	1938	0.0070703	1.5055	3.1275	0.57015
untreated-a	2030	2040	2048	1.5074	0.72713	2.2158	1.0484	1980	1860	2034	1920	1710	1956	1836	1950	0.0068019	0.0062777	2082	0.0061002	1.3817	2.8758	0.50352
untreated-a	2030	2040	2049	1.8277	0.72713	2.2903	1.0484	2016	1860	2064	1920	1710	1956	1836	1950	0.0068019	0.0062777	2106	0.0055849	1.3135	3.0585	0.5602
untreated-a	2040	2048	2057	1.5695	0.75372	2.5369	1.1079	2112	1980	2178	2034	1836	2088	1956	2082	0.0061002	0.0068019	2196	0.0069565	1.381	2.8501	0.50714
untreated-a	2040	2048	2058	1.8277	0.75372	2.4116	1.1079	2130	1980	2178	2034	1836	2088	1956	2082	0.0061002	0.0068019	2202	0.005803	1.4508	2.7553	0.52759
untreated-a	2040	2049	2063	1.5765	0.91384	2.0945	1.1451	2130	2016	2190	2064	1836	2112	1956	2106	0.0055849	0.0068019	2244	0.0054916	1.3814	2.8739	0.56415
untreated-a	2040	2049	2064	1.8256	0.91384	2.3463	1.1451	2148	2016	2196	2064	1836	2112	1956	2106	0.0055849	0.0068019	2256	0.0053608	1.5691	3.3149	0.54179
untreated-a	2048	2057	2068	1.7652	0.78474	2.5407	1.2685	2232	2112	2292	2178	1956	2202	2088	2196	0.0069565	0.0061002	2322	0.0067315	1.51	3.2601	0.51067
untreated-a	2049	2063	2073	2.085	0.78825	2.6751	1.0472	2328	2130	2370	2190	1956	2250	2112	2244	0.0054916	0.0055849	2400	0.0053036	1.4449	3.1741	0.55107
untreated-a	2169	2181	2187	2.217	1.0122	2.9352	1.3057	924	804	972	840	666	870	774	864	0.0069836	0.0070021	996	0.0057422	1.706	3.5121	0.52553
untreated-a	2169	2181	2188	1.8957	1.0122	2.483	1.3057	924	804	966	840	666	870	774	864	0.0069836	0.0070021	1026	0.006136	1.4407	3.591	0.53699
untreated-a	2181	2188	2201	1.7246	0.94784	2.5423	1.2415	1020	924	1074	966	774	1032	870	1026	0.006136	0.0069836	1104	0.0066027	1.8962	3.0642	0.53414
untreated-a	2181	2188	2202	1.7246	0.94784	2.0318	1.2415	1020	924	1074	966	774	1032	870	1026	0.006136	0.0069836	1110	0.0058433	1.6417	2.6005	0.52251
untreated-a	2188	2201	2209	1.9607	0.86228	2.6634	1.2711	1152	1020	1200	1074	870	1110	1032	1104	0.0066027	0.006136	1224	0.0062297	1.5069	3.0665	0.53036
untreated-a	2188	2202	2213	1.6995	0.86228	2.4042	1.0159	1188	1020	1242	1074	870	1116	1032	1110	0.0058433	0.006136	1278	0.0057393	1.2502	3.1149	0.52262
untreated-a	2188	2202	2214	1.7656	0.86228	2.2929	1.0159	1194	1020	1242	1074	870	1116	1032	1110	0.0058433	0.006136	1272	0.0056606	1.2509	2.9252	0.43716
untreated-a	2202	2213	2229	1.7011	0.84973	2.4771	1.2021	1308	1188	1362	1242	1032	1284	1116	1278	0.0057393	0.0058433	1392	0.0065379	1.4447	3.0021	0.529
untreated-a	2213	2229	2237	1.832	0.85055	2.7524	1.2386	1440	1308	1506	1362	1116	1398	1284	1392	0.0065379	0.0057393	1512	0.006006	1.4454	2.8757	0.51524
untreated-a	2222	2236	2247	1.705	0.85106	2.2266	1.1419	1512	1398	1560	1446	1224	1476	1368	1470	0.0063678	0.0061052	1608	0.0059819	1.4418	3.1173	0.5345
untreated-a	2222	2236	2248	1.7128	0.85106	2.3423	1.1419	1530	1398	1572	1446	1224	1476	1368	1470	0.0063678	0.0061052	1620	0.0065652	1.3793	3.2374	0.52391
untreated-a	2229	2237	2256	1.8332	0.91602	2.7323	1.3762	1560	1440	1614	1506	1284	1518	1398	1512	0.006006	0.0065379	1626	0.007411	1.3114	2.9844	0.46805
untreated-a	2236	2247	2265	1.6374	0.8525	2.2844	1.1133	1632	1512	1680	1560	1368	1614	1476	1608	0.0059819	0.0063678	1728	0.0073438	1.5019	3.3168	0.51793
untreated-a	2236	2248	2267	1.6317	0.8564	2.4284	1.1712	1632	1530	1698	1572	1368	1626	1476	1620	0.0065652	0.0063678	1716	0.0063621	1.6382	2.8542	0.50312
untreated-a	2247	2265	2278	1.9669	0.81869	2.7942	1.1422	1758	1632	1806	1680	1476	1734	1614	1728	0.0073438	0.0059819	1830	0.0068479	1.6333	3.2501	0.52815
untreated-a	2469	2484	2497	1.8284	0.75265	2.4081	1.1429	894	774	936	822	648	852	762	846	0.008434	0.0071948	972	0.0069315	1.4407	3.134	0.54491
untreated-a	2484	2497	2509	1.6371	0.91422	2.3447	1.2041	990	894	1044	936	762	978	852	972	0.0069315	0.008434	1068	0.006566	1.5788	2.8101	0.4997
untreated-a	2484	2497	2510	1.7687	0.91422	2.4822	1.2041	1002	894	1062	936	762	978	852	972	0.0069315	0.008434	1086	0.0061953	1.4407	2.876	0.54245
untreated-a	2483	2504	2513	1.9604	0.8821	2.6052	1.1734	1026	906	1068	948	762	984	858	978	0.006954	0.0069883	1092	0.0071222	1.5749	3.3022	0.49502
untreated-a	2497	2509	2521	2.0194	0.81853	2.7403	1.1724	1134	990	1182	1044	852	1074	978	1068	0.006566	0.0069315	1206	0.0068681	1.2416	3.3175	0.52437
untreated-a	2497	2510	2523	1.9598	0.88437	2.5335	1.2411	1146	1002	1188	1062	852	1092	978	1086	0.0061953	0.0069315	1218	0.00597	1.5085	3.0622	0.52298
untreated-a	2497	2510	2524	1.6367	0.88437	2.2182	1.2411	1122	1002	1170	1062	852	1092	978	1086	0.0061953	0.0069315	1206	0.0064443	1.51	2.9816	0.47146
untreated-a	2509	2521	2539	1.7685	1.0097	2.3458	1.3701	1242	1134	1284	1182	978	1212	1074	1206	0.0068681	0.006566	1314	0.0065154	1.5114	2.9295	0.5227
untreated-a	2509	2521	2540	2.2909	1.0097	2.9152	1.3701	1266	1134	1308	1182	978	1212	1074	1206	0.0068681	0.006566	1332	0.005955	1.7008	3.5583	0.52316
untreated-a	2510	2523	2545	1.8309	0.97992	2.4124	1.2668	1248	1146	1296	1188	978	1224	1092	1218	0.00597	0.0061953	1332	0.006387	1.6397	3.1269	0.52774
untreated-a	2521	2540	2561	1.9607	1.1455	2.858	1.4576	1362	1266	1416	1308	1074	1338	1212	1332	0.005955	0.0068681	1440	0.0063785	1.701	3.3037	0.52084
untreated-a	2540	2561	2579	2.0231	0.98034	2.7438	1.429	1476	1362	1524	1416	1212	1446	1338	1440	0.0063785	0.005955	1560	0.0064496	1.769	3.6232	0.50869
untreated-a	2562	2582	2594	1.9634	1.2062	2.7313	1.4991	1620	1518	1674	1560	1338	1602	1452	1596	0.0054018	0.0057948	1698	0.0063996	1.7724	3.2414	0.52676
untreated-a	2591	2605	2619	1.8247	0.91561	2.4163	1.2414	1842	1722	1884	1770	1578	1800	1692	1794	0.006946	0.0062314	1914	0.0067899	1.4412	3.1185	0.53067
untreated-a	2591	2605	2620	2.0302	0.91561	2.6685	1.2414	1884	1722	1926	1770	1578	1800	1692	1794	0.006946	0.0062314	1950	0.0060811	1.3102	3.1337	0.5296
untreated-a	2605	2619	2637	1.8973	0.91234	2.5456	1.2081	1962	1842	2010	1884	1692	1920	1800	1914	0.0067899	0.006946	2028	0.0063389	1.4422	2.9292	0.52495
untreated-a	2605	2619	2638	1.9626	0.91234	2.5452	1.2081	1968	1842	2010	1884	1692	1920	1800	1914	0.0067899	0.006946	2040	0.0063031	1.5103	3.266	0.50536
untreated-a	2605	2620	2643	1.9026	1.0151	2.5986	1.3343	1992	1884	2040	1926	1692	1956	1800	1950	0.0060811	0.006946	2070	0.005824	1.5735	3.1149	0.51129
untreated-a	2619	2637	2651	1.8317	0.94863	2.6119	1.2728	2076	1962	2130	2010	1800	2034	1920	2028	0.0063389	0.0067899	2160	0.0068343	1.3745	3.2477	0.54824
untreated-a	2619	2637	2652	1.6429	0.94863	2.2203	1.2728	2052	1962	2106	2010	1800	2034	1920	2028	0.0063389	0.0067899	2136	0.0060865	1.5076	2.8076	0.51411
untreated-a	2620	2643	2657	1.9628	0.95128	2.7358	1.2993	2124	1992	2178	2040	1800	2076	1956	2070	0.005824	0.0060811	2190	0.0061793	1.439	3.1126	0.5045
untreated-a	2620	2643	2658	1.8317	0.95128	2.4065	1.2993	2136	1992	2184	2040	1800	2076	1956	2070	0.005824	0.0060811	2214	0.0054416	1.5739	2.925	0.55849
untreated-a	2637	2652	2665	1.8947	0.82147	2.6655	1.1101	2190	2052	2238	2106	1920	2142	2034	2136	0.0060865	0.0063389	2268	0.0072462	1.4439	3.4421	0.48369
untreated-a	2637	2652	2666	1.8252	0.82147	2.5421	1.1101	2184	2052	2238	2106	1920	2142	2034	2136	0.0060865	0.0063389	2268	0.0061604	1.3803	3.0635	0.50015
untreated-a	2643	2658	2681	2.0861	0.91586	2.6686	1.2032	2280	2136	2322	2184	1956	2220	2076	2214	0.0054416	0.005824	2334	0.0065294	1.4425	3.0651	0.54779
untreated-a	2652	2666	2695	1.8294	0.91259	2.7443	1.271	2316	2184	2364	2238	2034	2274	2142	2268	0.0061604	0.0060865	2394	0.0066407	1.5089	3.1831	0.48705
untreated-a	2652	2666	2696	1.7677	0.91259	2.3483	1.271	2310	2184	2358	2238	2034	2274	2142	2268	0.0061604	0.0060865	2388	0.0060961	1.4472	2.9266	0.51506
untreated-a	3318	3336	3374	1.9669	0.97879	2.5367	1.2796	960	834	1008	882	696	930	780	924	0.0059994	0.0070945	1038	0.0060563	1.6336	3.2449	0.56203
untreated-a	3318	3336	3375	1.7681	0.97879	2.5405	1.2796	942	834	996	882	696	930	780	924	0.0059994	0.0070945	1026	0.0064059	1.6321	3.0684	0.53007
untreated-a	3336	3375	3395	1.6983	0.88404	2.4756	1.2703	1056	942	1110	996	780	1032	930	1026	0.0064059	0.0059994	1146	0.0065635	1.5761	3.238	0.56474
untreated-a	3336	3374	3397	2.0234	0.98343	2.6164	1.2684	1080	960	1134	1008	780	1044	930	1038	0.0060563	0.0059994	1152	0.005226	1.7012	3.0581	0.47348
untreated-a	3375	3395	3420	1.8307	0.84916	2.4122	1.2378	1176	1056	1224	1110	930	1152	1032	1146	0.0065635	0.0064059	1254	0.0062426	1.5714	2.9435	0.51514
untreated-a	3375	3395	3421	1.8961	0.84916	2.6715	1.2378	1188	1056	1242	1110	930	1152	1032	1146	0.0065635	0.0064059	1266	0.0063273	1.5718	3.1935	0.52331
untreated-a	3374	3397	3423	1.8962	1.0117	2.422	1.3082	1206	1080	1254	1134	930	1158	1044	1152	0.005226	0.0060563	1278	0.0057306	1.445	2.9125	0.52117
untreated-a	3395	3420	3437	1.9629	0.91535	2.6754	1.2061	1314	1176	1362	1224	1032	1260	1152	1254	0.0062426	0.0065635	1392	0.0061913	1.5028	3.329	0.46682
untreated-a	3395	3421	3444	1.765	0.94806	2.4088	1.3357	1290	1188	1332	1242	1032	1272	1152	1266	0.0063273	0.0065635	1332	0.0074328	1.5721	2.4088	0.39888
untreated-a	3420	3437	3480	2.0887	0.98143	2.9249	1.3377	1440	1314	1488	1362	1152	1398	1260	1392	0.0061913	0.0062426	1512	0.0066681	1.6424	3.4568	0.42066
untreated-a	3420	3437	3481	2.0222	0.98143	2.8029	1.3377	1434	1314	1482	1362	1152	1398	1260	1392	0.0061913	0.0062426	1512	0.0061327	1.6343	3.2578	0.43323
untreated-a	3437	3480	3502	2.2172	1.0444	2.8706	1.4624	1554	1440	1596	1488	1260	1518	1398	1512	0.0066681	0.0061913	1626	0.0064849	1.8354	3.6592	0.51595
untreated-a	3437	3480	3503	2.1575	1.0444	2.9271	1.4624	1572	1440	1620	1488	1260	1518	1398	1512	0.0066681	0.0061913	1638	0.0058002	1.638	3.2557	0.43964
untreated-a	3480	3502	3525	2.3501	1.1086	3.0547	1.4353	1668	1554	1710	1596	1398	1632	1518	1626	0.0064849	0.0066681	1728	0.0062038	1.9685	3.5806	0.45227
untreated-a	3480	3502	3526	1.825	1.1086	2.5446	1.4353	1656	1554	1704	1596	1398	1632	1518	1626	0.0064849	0.0066681	1722	0.0065056	1.704	2.9774	0.43972
untreated-a	3502	3525	3546	2.2268	1.1751	3.5137	1.5274	1788	1668	1854	1710	1518	1734	1632	1728	0.0062038	0.0064849	1866	0.005998	1.7026	3.711	0.43844
untreated-a	3509	3532	3559	1.9631	0.91435	2.4194	1.2036	1854	1716	1908	1764	1536	1800	1650	1794	0.0051653	0.0070548	1938	0.0052671	1.3719	3.004	0.49356
untreated-a	3509	3532	3560	1.7668	0.91435	2.2874	1.2036	1836	1716	1884	1764	1536	1800	1650	1794	0.0051653	0.0070548	1920	0.0059202	1.4399	2.9284	0.51394
untreated-a	3525	3546	3575	1.9596	1.1134	2.6077	1.7568	1914	1788	1962	1854	1632	1872	1734	1866	0.005998	0.0062038	1986	0.0054059	1.5695	3.0444	0.41477
untreated-a	3532	3560	3579	1.8354	0.88338	2.3522	1.1437	1974	1836	2028	1884	1650	1926	1800	1920	0.0059202	0.0051653	2070	0.0054354	1.3745	3.0674	0.47978
untreated-a	3532	3560	3580	1.7026	0.88338	2.4837	1.1437	1956	1836	2016	1884	1650	1926	1800	1920	0.0059202	0.0051653	2052	0.0063985	1.4448	3.1247	0.51057
untreated-a	3560	3580	3606	1.761	0.85132	2.4809	1.2418	2076	1956	2124	2016	1800	2058	1926	2052	0.0063985	0.0059202	2172	0.0067698	1.5745	3.4397	0.5008
untreated-a	3560	3580	3607	1.7042	0.85132	2.3451	1.2418	2082	1956	2130	2016	1800	2058	1926	2052	0.0063985	0.0059202	2160	0.0069145	1.517	2.996	0.47336
untreated-a	3580	3607	3636	1.8987	0.85211	2.7274	1.1726	2202	2082	2250	2130	1926	2166	2058	2160	0.0069145	0.0063985	2286	0.0069105	1.5066	3.3625	0.45054
untreated-a	3580	3607	3637	1.7028	0.85211	2.46	1.1726	2202	2082	2268	2130	1926	2166	2058	2160	0.0069145	0.0063985	2322	0.005333	1.436	3.128	0.52072
untreated-a	3588	3617	3658	1.9614	1.1437	2.5351	1.4324	2280	2166	2334	2214	1980	2250	2094	2244	0.0044229	0.0049557	2376	0.0052137	1.6984	3.3066	0.4732
untreated-a	3607	3636	3665	2.2837	0.94934	2.8791	1.3637	2340	2202	2382	2250	2058	2292	2166	2286	0.0069105	0.0069145	2406	0.0054602	1.7001	3.2532	0.51012
untreated-a	3827	3849	3875	1.5108	0.82162	2.2189	1.1431	840	732	888	780	612	810	708	804	0.0078687	0.0079421	900	0.0073448	1.2527	2.3571	0.51693
untreated-a	3849	3875	3900	1.5689	0.75541	2.2918	1.1094	960	840	1008	888	708	906	810	900	0.0073448	0.0078687	1032	0.0068458	1.1183	2.6814	0.55013
untreated-a	3860	3902	3926	1.6383	0.91736	2.0856	1.1724	1068	954	1116	1002	750	1038	906	1032	0.0054712	0.0049472	1164	0.0059528	1.4377	2.9303	0.52433
untreated-a	3860	3902	3927	1.7005	0.91736	2.2873	1.1724	1080	954	1134	1002	750	1038	906	1032	0.0054712	0.0049472	1170	0.0054732	1.4436	2.8712	0.5861
untreated-a	3902	3926	3955	1.7646	0.81915	2.3546	1.0428	1206	1068	1254	1116	906	1170	1038	1164	0.0059528	0.0054712	1278	0.0064674	1.5093	2.8743	0.50942
untreated-a	3902	3927	3958	1.7649	0.85023	2.3555	1.1436	1230	1080	1284	1134	906	1176	1038	1170	0.0054732	0.0054712	1308	0.0054471	1.4457	2.8719	0.54793
untreated-a	3902	3927	3959	1.6351	0.85023	2.218	1.1436	1206	1080	1260	1134	906	1176	1038	1170	0.0054732	0.0054712	1314	0.0057687	1.4443	3.0981	0.46481
untreated-a	3927	3958	3981	1.6305	0.88243	2.4079	1.1778	1332	1230	1386	1284	1038	1314	1176	1308	0.0054471	0.0054732	1410	0.0070684	1.443	2.8691	0.5192
untreated-a	3927	3959	3984	1.507	0.81753	2.1564	1.109	1332	1206	1398	1260	1038	1320	1176	1314	0.0057687	0.0054732	1428	0.0061143	1.3748	2.7174	0.5299
untreated-a	3927	3959	3985	1.5752	0.81753	2.2094	1.109	1332	1206	1386	1260	1038	1320	1176	1314	0.0057687	0.0054732	1410	0.0065521	1.5741	2.6711	0.50344
untreated-a	3959	3985	3996	1.7048	0.78759	2.4148	1.1047	1464	1332	1512	1386	1176	1416	1320	1410	0.0065521	0.0057687	1530	0.0066446	1.3754	2.8609	0.50118
untreated-a	3959	3985	3997	1.5771	0.78759	2.3484	1.1047	1452	1332	1518	1386	1176	1416	1320	1410	0.0065521	0.0057687	1536	0.0063322	1.2511	2.6837	0.4743
untreated-a	3959	3984	4000	1.6392	0.7535	2.4082	1.0782	1476	1332	1530	1398	1176	1434	1320	1428	0.0061143	0.0057687	1542	0.0065835	1.3843	2.6708	0.50635
untreated-a	3985	3996	4026	1.7723	0.85239	2.4526	1.2074	1572	1464	1614	1512	1320	1536	1416	1530	0.0066446	0.0065521	1644	0.0071412	1.4517	2.9897	0.47706
untreated-a	4101	4132	4157	1.6399	0.78669	2.3496	1.1418	2100	1992	2154	2040	1842	2076	1962	2070	0.0069777	0.0063439	2184	0.0065615	1.3797	2.8554	0.46305
untreated-a	4101	4133	4160	1.5692	0.85259	2.5433	1.2048	2100	1998	2166	2052	1842	2082	1962	2076	0.0063857	0.0063439	2190	0.006924	1.5092	3.1203	0.48163
untreated-a	4106	4140	4167	1.7033	0.8139	2.4138	1.1724	2124	2010	2184	2064	1866	2100	1980	2094	0.0074454	0.0074115	2226	0.0057818	1.5726	3.1271	0.46604
untreated-a	4133	4160	4181	1.6398	0.78459	2.1557	1.2717	2214	2100	2262	2166	1962	2196	2082	2190	0.006924	0.0063857	2304	0.0064376	1.3724	2.8692	0.4704
untreated-a	4133	4160	4182	1.5094	0.78459	2.2175	1.2717	2226	2100	2292	2166	1962	2196	2082	2190	0.006924	0.0063857	2316	0.0062508	1.2512	2.61	0.5277
untreated-a	4604	4625	4646	1.9665	0.91481	2.6046	1.2738	2094	1968	2142	2022	1812	2046	1932	2040	0.0057688	0.0062899	2172	0.0057742	1.5707	3.1846	0.49616
untreated-a	4604	4626	4649	2.1556	1.0468	2.7314	1.3669	2094	1974	2136	2022	1812	2052	1932	2046	0.006244	0.0062899	2154	0.0058812	1.7649	3.1698	0.4969
untreated-a	4604	4626	4650	1.8387	1.0468	2.4884	1.3669	2088	1974	2136	2022	1812	2052	1932	2046	0.006244	0.0062899	2190	0.00601	1.5743	3.4481	0.48339
untreated-a	4626	4649	4675	1.9559	1.0778	2.6058	1.3657	2202	2094	2244	2136	1932	2160	2052	2154	0.0058812	0.006244	2262	0.006373	1.5753	2.9414	0.5108
untreated-a	4626	4649	4676	2.0277	1.0778	2.5451	1.3657	2196	2094	2238	2136	1932	2160	2052	2154	0.0058812	0.006244	2268	0.0060728	1.5721	3.1769	0.50594
untreated-a	4626	4650	4685	1.8328	0.91934	2.6749	1.2442	2208	2088	2268	2136	1932	2196	2052	2190	0.00601	0.006244	2280	0.0069547	1.6358	3.0011	0.54179
untreated-a	4626	4650	4686	1.769	0.91934	2.5392	1.2442	2196	2088	2256	2136	1932	2196	2052	2190	0.00601	0.006244	2280	0.0060902	1.769	2.9171	0.45867
untreated-a	4650	4685	4707	1.7711	0.91641	2.4842	1.3375	2316	2208	2364	2268	2052	2286	2196	2280	0.0069547	0.00601	2400	0.0066291	1.5123	3.1948	0.48959
untreated-a	4650	4685	4708	1.7728	0.91641	2.3611	1.3375	2322	2208	2370	2268	2052	2286	2196	2280	0.0069547	0.00601	2406	0.0062717	1.3752	3.0024	0.51935
untreated-a	4650	4686	4710	1.8298	0.88449	2.4158	1.2696	2328	2196	2376	2256	2052	2286	2196	2280	0.0060902	0.00601	2406	0.0063566	1.5141	3.0516	0.49381
untreated-a	5045	5062	5076	1.962	0.94752	2.5481	1.395	2100	1992	2148	2046	1860	2064	1950	2058	0.00692	0.0068946	2166	0.0062177	1.5047	2.9323	0.42733
untreated-a	5314	5331	5349	1.8934	0.88368	3.059	1.3653	966	858	1038	918	744	948	846	942	0.0075719	0.0078966	1068	0.0064366	1.638	3.6288	0.45476
untreated-a	5321	5338	5351	1.5066	0.8171	2.2821	1.2744	990	888	1038	936	768	960	876	954	0.0084229	0.0075585	1074	0.0075459	1.2455	2.9302	0.49708
untreated-a	5321	5339	5352	1.7046	0.85219	2.4869	1.2416	996	888	1044	942	768	972	876	966	0.0073988	0.0075585	1068	0.008349	1.3788	3.0602	0.5127
untreated-a	5321	5339	5353	1.6294	0.85219	2.6053	1.2416	996	888	1056	942	768	972	876	966	0.0073988	0.0075585	1074	0.0070639	1.5124	2.9932	0.46532
untreated-a	5339	5352	5365	2.0242	0.8523	2.8671	1.2434	1110	996	1158	1044	876	1074	972	1068	0.008349	0.0073988	1176	0.0075307	1.5688	3.2635	0.4802
untreated-a	5339	5353	5372	1.7641	0.81469	2.4787	1.3026	1110	996	1164	1056	876	1080	972	1074	0.0070639	0.0073988	1188	0.0069862	1.4435	3.0523	0.42002
untreated-a	5352	5365	5387	2.0255	1.0121	2.8638	1.4335	1224	1110	1278	1158	972	1182	1074	1176	0.0075307	0.008349	1284	0.0067936	1.5067	2.9951	0.50778
untreated-a	5365	5387	5403	1.6999	1.0128	2.6017	1.4319	1308	1224	1374	1278	1074	1290	1182	1284	0.0067936	0.0075307	1398	0.006615	1.4412	3.0019	0.46885
untreated-a	5439	5454	5467	1.8282	0.95168	2.6045	1.2384	1776	1668	1830	1716	1524	1746	1638	1740	0.0066492	0.0071507	1860	0.0060408	1.5075	3.0003	0.48289
untreated-a	5438	5458	5481	1.6364	1.0133	2.3421	1.3102	1842	1740	1890	1794	1524	1830	1680	1824	0.0053059	0.0053466	1914	0.0071319	1.6399	2.8525	0.52887
untreated-a	5458	5481	5498	1.8967	0.8182	2.6768	1.1711	1962	1842	2016	1890	1680	1920	1830	1914	0.0071319	0.0053059	2034	0.0066012	1.3755	3.0555	0.49883
untreated-a	5481	5498	5510	1.8337	0.94834	2.4266	1.3384	2070	1962	2118	2016	1830	2040	1920	2034	0.0066012	0.0071319	2136	0.0070037	1.4463	2.7967	0.47755
untreated-a	5498	5510	5522	1.7022	0.91684	2.4841	1.2133	2178	2070	2232	2118	1920	2142	2040	2136	0.0070037	0.0066012	2256	0.0069814	1.3764	2.9991	0.50264
untreated-a	5510	5522	5547	1.9023	0.85108	2.6038	1.2421	2292	2178	2340	2232	2040	2262	2142	2256	0.0069814	0.0070037	2382	0.0065068	1.5154	3.3753	0.4784
untreated-a	5781	5806	5825	1.894	0.88216	2.6047	1.3021	1050	936	1098	984	792	996	906	990	0.0077446	0.0068675	1110	0.0069443	1.3796	2.995	0.47311
untreated-a	5806	5825	5848	2.0903	0.947	2.8493	1.3023	1158	1050	1206	1098	906	1116	996	1110	0.0069443	0.0077446	1230	0.0071523	1.509	3.3858	0.47116
untreated-a	5825	5848	5874	2.0895	1.0451	2.8722	1.4247	1260	1158	1308	1206	996	1236	1116	1230	0.0071523	0.0069443	1332	0.0073101	1.6343	3.442	0.47859
untreated-a	5848	5874	5887	1.8978	1.0447	2.6086	1.4361	1362	1260	1410	1308	1116	1338	1236	1332	0.0073101	0.0071523	1422	0.0072652	1.5041	2.9196	0.45414
untreated-a	5848	5874	5888	1.9567	1.0447	3.1179	1.4361	1350	1260	1410	1308	1116	1338	1236	1332	0.0073101	0.0071523	1416	0.007712	1.7688	3.2572	0.44559
untreated-a	5874	5888	5900	1.7693	0.97834	2.1652	1.5589	1440	1350	1464	1410	1236	1422	1338	1416	0.007712	0.0073101	1500	0.0075251	1.6391	2.8642	0.48955
untreated-a	5944	5957	5988	2.0261	0.94443	2.5436	1.3696	1890	1788	1938	1830	1614	1854	1716	1848	0.0069458	0.0068183	1968	0.0054112	1.7034	3.1687	0.48262
untreated-a	5944	5957	5989	1.7054	0.94443	2.3487	1.3696	1884	1788	1932	1830	1614	1854	1716	1848	0.0069458	0.0068183	1944	0.0065621	1.4422	2.6048	0.48942
untreated-a	5946	5959	5991	1.6379	0.78672	2.4169	1.1122	1896	1764	1944	1818	1614	1854	1722	1848	0.0065031	0.0063774	1962	0.0067714	1.3071	2.6531	0.31814
untreated-a	5957	5989	6019	1.7686	0.85269	2.2938	1.1743	1992	1884	2040	1932	1716	1950	1854	1944	0.0065621	0.0069458	2082	0.0060841	1.3762	3.0026	0.49009
untreated-a	5957	5988	6026	1.8978	1.0131	2.5441	1.2718	2010	1890	2064	1938	1716	1974	1854	1968	0.0054112	0.0069458	2100	0.0059467	1.5065	3.2537	0.54683
untreated-a	5989	6019	6041	1.6372	0.88432	2.2126	1.1469	2118	1992	2166	2040	1854	2088	1950	2082	0.0060841	0.0065621	2184	0.0068004	1.3089	2.5503	0.52405
untreated-a	5989	6019	6042	2.2175	0.88432	2.6769	1.1469	2136	1992	2178	2040	1854	2088	1950	2082	0.0060841	0.0065621	2202	0.0060697	1.574	3.1923	0.48058
untreated-a	5988	6026	6044	1.8991	0.94891	2.6099	1.272	2136	2010	2190	2064	1854	2106	1974	2100	0.0059467	0.0054112	2214	0.0060321	1.635	3.1357	0.52918
untreated-a	6026	6044	6069	1.7646	0.94956	2.6828	1.305	2256	2136	2316	2190	1974	2220	2106	2214	0.0060321	0.0059467	2340	0.0068701	1.3736	3.1864	0.49853
untreated-a	6352	6380	6415	1.707	0.75268	2.3496	1.0122	1230	1098	1278	1146	942	1200	1062	1194	0.0064371	0.0060392	1314	0.0067861	1.3804	3.114	0.49329
untreated-a	6352	6380	6416	1.3723	0.75268	2.0894	1.0122	1206	1098	1272	1146	942	1200	1062	1194	0.0064371	0.0060392	1302	0.0071222	1.3141	2.6642	0.50773
untreated-a	6353	6381	6417	1.5702	0.78534	2.2181	1.0754	1242	1122	1302	1164	942	1212	1080	1206	0.0066932	0.0063425	1338	0.0060422	1.3113	2.6136	0.41028
untreated-a	6380	6416	6427	1.7062	0.68617	2.4114	1.0447	1356	1206	1410	1272	1062	1308	1200	1302	0.0071222	0.0064371	1434	0.0069947	1.3791	2.9986	0.4877
untreated-a	6380	6415	6436	1.6396	0.85351	2.4717	1.1748	1338	1230	1386	1278	1062	1320	1200	1314	0.0067861	0.0064371	1416	0.0077134	1.4479	3.066	0.53151
untreated-a	6415	6436	6459	1.5714	0.81982	2.2798	1.2359	1422	1338	1470	1386	1200	1422	1320	1416	0.0077134	0.0067861	1494	0.0082684	1.5714	2.8659	0.4479
untreated-a	6415	6436	6460	1.5135	0.81982	2.3453	1.2359	1422	1338	1482	1386	1200	1422	1320	1416	0.0077134	0.0067861	1512	0.0075934	1.5135	2.8603	0.4484
untreated-a	6416	6427	6465	1.7594	0.85311	2.4186	1.2057	1488	1356	1542	1410	1200	1440	1308	1434	0.0069947	0.0071222	1554	0.0065345	1.244	2.7923	0.4772
untreated-a	6436	6460	6487	1.6999	0.75673	3.0651	1.1727	1536	1422	1602	1482	1320	1518	1422	1512	0.0075934	0.0077134	1602	0.0088544	1.4426	3.0651	0.4674
untreated-a	6935	6962	6980	1.7664	0.81943	2.7342	1.1763	1476	1362	1536	1410	1206	1446	1326	1440	0.0071316	0.0057674	1542	0.0072136	1.5765	2.9363	0.47033
untreated-a	6935	6962	6981	1.7065	0.81943	2.6073	1.1763	1464	1362	1518	1410	1206	1446	1326	1440	0.0071316	0.0057674	1548	0.007036	1.5063	3.0483	0.50278
untreated-a	6935	6963	6982	1.9661	0.8161	2.7332	1.2721	1494	1356	1542	1416	1206	1446	1326	1440	0.0069755	0.0057674	1566	0.0066598	1.5102	3.2464	0.60103
untreated-a	6962	6981	6997	1.6366	0.85325	2.471	1.3036	1572	1464	1632	1518	1326	1554	1446	1548	0.007036	0.0071316	1650	0.0072458	1.4419	2.9735	0.47744
untreated-a	6963	6982	7000	1.764	0.98307	2.6165	1.3666	1584	1494	1638	1542	1326	1572	1446	1566	0.0066598	0.0069755	1650	0.0067827	1.7038	2.8561	0.54461
untreated-a	6963	6982	7001	1.7653	0.98307	2.3421	1.3666	1584	1494	1626	1542	1326	1572	1446	1566	0.0066598	0.0069755	1662	0.0073836	1.5735	3.0513	0.53451
untreated-a	6982	7000	7014	1.5684	0.88202	3.052	1.3083	1668	1584	1758	1638	1446	1656	1572	1650	0.0067827	0.0066598	1776	0.007131	1.5122	3.4567	0.50516
untreated-a	6982	7001	7016	1.4378	0.88267	2.2827	1.171	1674	1584	1728	1626	1446	1668	1572	1662	0.0073836	0.0066598	1752	0.0079191	1.3757	2.6716	0.58147
untreated-a	7001	7016	7034	1.5121	0.71891	2.2132	1.1413	1782	1674	1830	1728	1572	1758	1668	1752	0.0079191	0.0073836	1854	0.008094	1.316	2.6785	0.39501
untreated-a	7001	7016	7035	1.6995	0.71891	2.5462	1.1413	1812	1674	1866	1728	1572	1758	1668	1752	0.0079191	0.0073836	1878	0.0064271	1.2472	2.7252	0.43295
untreated-a	7016	7034	7054	1.5752	0.75604	2.4098	1.1066	1884	1782	1962	1830	1668	1860	1758	1854	0.008094	0.0079191	1986	0.0056801	1.2494	2.8067	0.36507
untreated-a	7016	7035	7058	1.7042	0.84973	2.4157	1.2731	1920	1812	1962	1866	1668	1884	1758	1878	0.0064271	0.0079191	1986	0.008248	1.2551	2.8685	0.4969
untreated-a	7272	7292	7323	1.8309	0.8858	2.4198	1.4005	912	810	960	870	678	894	786	888	0.0071361	0.0070085	990	0.0074395	1.6394	3.1949	0.48053
untreated-a	7272	7293	7324	1.5073	0.85399	2.2153	1.1384	912	810	972	852	678	906	786	900	0.0069667	0.0070085	978	0.0061793	1.516	2.3389	0.494
untreated-a	7293	7324	7339	1.5686	0.75366	2.1606	1.1076	1062	912	1116	972	786	984	906	978	0.0061793	0.0069667	1146	0.0057517	1.1839	2.7855	0.54352
untreated-a	7324	7339	7358	1.7698	0.78432	2.2171	1.0803	1206	1062	1248	1116	906	1152	984	1146	0.0057517	0.0061793	1308	0.0059062	1.3117	3.441	0.5576
untreated-a	7339	7358	7388	1.8953	0.88489	2.5482	1.1086	1332	1206	1380	1248	984	1314	1152	1308	0.0059062	0.0057517	1404	0.0057667	1.77	3.0033	0.51202
untreated-a	7358	7388	7410	1.4413	0.94763	2.6666	1.2741	1434	1332	1506	1380	1152	1410	1314	1404	0.0057667	0.0059062	1524	0.0076549	1.3745	3.0625	0.48464
untreated-a	7358	7388	7411	1.8914	0.94763	2.6618	1.2741	1440	1332	1494	1380	1152	1410	1314	1404	0.0057667	0.0059062	1506	0.0068313	1.5745	2.9896	0.48945
untreated-a	7388	7411	7423	1.8277	0.9457	2.6691	1.3309	1554	1440	1602	1494	1314	1512	1410	1506	0.0068313	0.0057667	1626	0.0072497	1.3827	3.2516	0.49122
untreated-a	7411	7423	7436	1.5769	0.91387	2.2263	1.3346	1638	1554	1698	1602	1410	1632	1512	1626	0.0072497	0.0068313	1722	0.0067377	1.5057	2.7097	0.50068
untreated-a	7411	7423	7437	1.7611	0.91387	2.4163	1.3346	1638	1554	1686	1602	1410	1632	1512	1626	0.0072497	0.0068313	1734	0.0075458	1.7034	3.5042	0.49398
untreated-a	7423	7436	7463	1.7644	0.78844	2.6523	1.1131	1764	1638	1812	1698	1512	1728	1632	1722	0.0067377	0.0072497	1830	0.0081421	1.3856	3.0473	0.45393
untreated-a	7423	7437	7468	2.0204	0.88056	2.797	1.2081	1752	1638	1800	1686	1512	1740	1632	1734	0.0075458	0.0072497	1812	0.0079354	1.5721	2.9859	0.51411
untreated-a	7437	7468	7485	1.7594	1.0102	2.345	1.3985	1842	1752	1890	1800	1632	1818	1740	1812	0.0079354	0.0075458	1914	0.006321	1.5051	2.7454	0.48848
untreated-a	7436	7463	7489	1.8327	0.88222	2.5482	1.3262	1872	1764	1926	1812	1632	1836	1728	1830	0.0081421	0.0067377	1938	0.006859	1.5085	2.9258	0.45408
untreated-a	7468	7485	7498	1.7671	0.87971	2.3458	1.1725	1950	1842	1992	1890	1740	1920	1818	1914	0.006321	0.0079354	2028	0.0078339	1.3168	3.1175	0.49642
untreated-a	7485	7498	7519	2.0291	0.88354	2.6587	1.1729	2076	1950	2118	1992	1818	2034	1920	2028	0.0078339	0.006321	2136	0.0068589	1.5701	3.1907	0.46637
untreated-a	7523	7540	7565	1.5746	0.95097	2.4678	1.1092	2322	2232	2376	2256	2046	2274	2166	2268	0.006404	0.006573	2400	0.0074268	1.1821	2.8714	0.46075
untreated-a	7523	7540	7566	1.5104	0.95097	2.1651	1.1092	2322	2232	2370	2256	2046	2274	2166	2268	0.006404	0.006573	2394	0.0067111	1.1771	2.6605	0.50808
untreated-a	7849	7867	7881	1.5754	1.0825	1.7666	1.2068	2160	2094	2190	2118	1878	2130	2040	2124	0.0062275	0.0054248	2274	0.005139	1.3832	2.7894	0.39027
untreated-a	7849	7868	7885	1.6409	0.84797	2.1512	0.98108	2202	2076	2250	2106	1878	2172	2040	2166	0.0061452	0.0054248	2286	0.0068502	1.3067	2.8636	0.51295
untreated-a	7857	7875	7897	1.9601	0.98419	2.5475	1.1452	2268	2142	2316	2166	1974	2196	2088	2190	0.0072449	0.0060991	2358	0.005989	1.3171	3.3203	0.52659
untreated-a	8063	8081	8094	1.8234	0.85479	2.8624	1.3307	984	882	1044	948	756	972	864	966	0.0077667	0.0075708	1062	0.007577	1.7011	3.3898	0.47002
untreated-a	8145	8167	8181	2.0271	0.78539	3.0599	1.2072	1674	1554	1734	1614	1392	1644	1536	1638	0.0073746	0.0059426	1746	0.007175	1.567	3.3105	0.49942
untreated-a	8145	8167	8182	1.5735	0.78539	2.1459	1.2072	1662	1554	1704	1614	1392	1644	1536	1638	0.0073746	0.0059426	1746	0.0073655	1.5047	2.9841	0.49967
untreated-a	8167	8182	8198	1.4394	0.78673	2.4057	1.0729	1764	1662	1836	1704	1536	1752	1644	1746	0.0073655	0.0073746	1842	0.0066135	1.5048	2.6026	0.47992
untreated-a	8495	8510	8522	1.6407	0.88169	2.3517	1.2076	1500	1398	1554	1458	1290	1482	1386	1476	0.0056137	0.0069676	1578	0.0076137	1.4422	2.8666	0.50149
untreated-a	8495	8510	8523	1.8311	0.88169	2.3455	1.2076	1530	1398	1572	1458	1290	1482	1386	1476	0.0056137	0.0069676	1614	0.0063429	1.3832	3.1299	0.4832
untreated-a	8510	8522	8540	1.8939	0.82036	2.3443	1.1759	1614	1500	1650	1554	1386	1584	1482	1578	0.0076137	0.0056137	1668	0.0073232	1.438	2.8003	0.51408
untreated-a	8510	8522	8541	1.6365	0.82036	2.286	1.1759	1608	1500	1656	1554	1386	1584	1482	1578	0.0076137	0.0056137	1680	0.007608	1.3784	2.8712	0.5154
untreated-a	8510	8523	8551	1.6962	0.91557	2.3479	1.1728	1644	1530	1692	1572	1386	1620	1482	1614	0.0063429	0.0056137	1722	0.0070793	1.5008	2.9913	0.48971
untreated-a	8510	8523	8552	1.8895	0.91557	2.7461	1.1728	1650	1530	1698	1572	1386	1620	1482	1614	0.0063429	0.0056137	1728	0.0074528	1.5691	3.3933	0.52189
untreated-a	8522	8540	8556	1.7717	0.94695	2.7396	1.1722	1710	1614	1764	1650	1482	1674	1584	1668	0.0073232	0.0076137	1788	0.0082366	1.3818	3.4033	0.46166
untreated-a	8522	8541	8558	1.7008	0.81827	2.5536	1.143	1716	1608	1782	1656	1482	1686	1584	1680	0.007608	0.0076137	1800	0.0067068	1.4455	3.0005	0.47887
untreated-a	8541	8558	8573	1.6989	0.85041	2.3589	1.2768	1836	1716	1884	1782	1584	1806	1686	1800	0.0067068	0.007608	1908	0.0069222	1.3777	2.7838	0.50018
untreated-a	8541	8558	8574	1.6355	0.85041	2.4778	1.2768	1830	1716	1890	1782	1584	1806	1686	1800	0.0067068	0.007608	1914	0.0070805	1.4391	3.0382	0.51793
untreated-a	8558	8574	8591	1.6334	0.81777	2.4081	1.2389	1938	1830	1992	1890	1686	1920	1806	1914	0.0070805	0.0067068	2010	0.0076108	1.4409	2.978	0.50261
untreated-a	8558	8574	8592	1.7622	0.81777	2.5543	1.2389	1944	1830	1998	1890	1686	1920	1806	1914	0.0070805	0.0067068	2028	0.0073141	1.5736	3.3274	0.44086
untreated-a	8574	8591	8599	1.569	0.81672	2.351	1.204	2028	1938	2082	1992	1806	2016	1920	2010	0.0076108	0.0070805	2100	0.0072531	1.5727	2.7348	0.41619
untreated-a	8574	8592	8600	1.6637	0.88109	2.343	1.2771	2028	1944	2082	1998	1806	2034	1920	2028	0.0073141	0.0070805	2106	0.0073727	1.6362	2.8606	0.44408
untreated-a	8592	8600	8616	1.8267	0.83184	2.1558	1.1715	2142	2028	2172	2082	1920	2112	2034	2106	0.0073727	0.0073141	2214	0.0077677	1.4509	3.1173	0.45055
untreated-a	8592	8600	8617	1.8263	0.83184	2.1581	1.1715	2154	2028	2178	2082	1920	2112	2034	2106	0.0073727	0.0073141	2220	0.0075696	1.4454	3.1774	0.43511
untreated-a	8600	8617	8641	1.7657	0.91313	2.4181	1.079	2256	2154	2304	2178	2034	2226	2112	2220	0.0075696	0.0073727	2334	0.006758	1.5727	3.0426	0.47748
untreated-a	96	113	124	1.6361	0.8521	2.2853	1.1731	882	768	936	816	660	858	744	852	0.0067742	0.0064204	966	0.0067816	1.4485	2.8769	0.529
untreated-a	96	113	125	1.7037	0.8521	2.4149	1.1731	882	768	936	816	660	858	744	852	0.0067742	0.0064204	960	0.0068383	1.5104	3.0003	0.57361
untreated-a	112	126	139	2.1581	0.98514	3.0092	1.3006	1008	882	1062	930	744	972	870	966	0.0057427	0.0062349	1068	0.0066165	1.704	3.2445	0.5506
untreated-a	112	126	140	1.8339	0.98514	2.3512	1.3006	1020	882	1068	930	744	972	870	966	0.0057427	0.0062349	1098	0.0052794	1.3766	2.8068	0.57305
untreated-a	113	124	143	2.0259	0.81807	2.804	1.1427	1020	882	1074	936	744	972	858	966	0.0067816	0.0067742	1086	0.0059094	1.5719	3.0598	0.54975
untreated-a	126	139	154	1.9603	1.079	2.7437	1.5046	1104	1008	1158	1062	870	1074	972	1068	0.0066165	0.0057427	1182	0.0064705	1.71	3.3127	0.47918
untreated-a	126	140	159	1.6366	0.91695	2.4156	1.1756	1146	1020	1218	1068	870	1104	972	1098	0.0052794	0.0057427	1248	0.0057694	1.3738	3.0003	0.54179
untreated-a	139	154	175	1.895	0.98016	2.6779	1.3719	1206	1104	1260	1158	972	1188	1074	1182	0.0064705	0.0066165	1278	0.0071426	1.7041	3.1203	0.50323
untreated-a	154	175	182	2.155	0.94748	2.7435	1.3389	1326	1206	1368	1260	1074	1284	1188	1278	0.0071426	0.0064705	1386	0.0070417	1.4426	3.2373	0.54034
untreated-a	175	182	194	1.83	1.0775	2.6713	1.3717	1428	1326	1482	1368	1188	1392	1284	1386	0.0070417	0.0071426	1494	0.0060798	1.7678	2.9984	0.54391
untreated-a	175	182	195	2.1537	1.0775	2.8138	1.3717	1452	1326	1500	1368	1188	1392	1284	1386	0.0070417	0.0071426	1530	0.0062185	1.5066	3.4542	0.50461
untreated-a	182	194	211	1.8355	0.915	2.6133	1.3357	1524	1428	1584	1482	1284	1500	1392	1494	0.0060798	0.0070417	1602	0.0065179	1.5763	3.0645	0.50263
untreated-a	264	284	306	1.8406	0.94706	2.7952	1.374	2034	1932	2094	1980	1800	2010	1902	2004	0.0069947	0.006632	2112	0.0064941	1.6333	3.0444	0.52935
untreated-a	264	284	307	2.0228	0.94706	2.7295	1.374	2046	1932	2088	1980	1800	2010	1902	2004	0.0069947	0.006632	2112	0.0068028	1.6322	3.2006	0.53355
untreated-a	264	283	311	2.0232	1.0453	2.8545	1.5362	2034	1932	2094	1998	1800	2016	1902	2010	0.0059528	0.006632	2118	0.0068591	1.6375	3.3747	0.50544
untreated-a	264	283	312	1.513	1.0453	2.2122	1.5362	2022	1932	2076	1998	1800	2016	1902	2010	0.0059528	0.006632	2118	0.0073017	1.4383	3.0539	0.54958
untreated-a	283	312	336	1.7668	0.7565	2.4766	1.1061	2142	2022	2190	2076	1902	2124	2016	2118	0.0073017	0.0059528	2220	0.0075733	1.5767	3.138	0.51645
untreated-a	312	336	356	1.8993	0.8834	2.4778	1.2383	2256	2142	2310	2190	2016	2226	2124	2220	0.0075733	0.0073017	2340	0.006365	1.5116	3.1794	0.48246
untreated-a	479	496	507	1.6361	0.8521	2.2853	1.1731	882	768	936	816	660	858	744	852	0.0067742	0.0064204	966	0.0067816	1.4485	2.8769	0.529
untreated-a	479	496	508	1.7037	0.8521	2.4149	1.1731	882	768	936	816	660	858	744	852	0.0067742	0.0064204	960	0.0068383	1.5104	3.0003	0.57361
untreated-a	495	509	522	2.1581	0.98514	3.0092	1.3006	1008	882	1062	930	744	972	870	966	0.0057427	0.0062349	1068	0.0066165	1.704	3.2445	0.5506
untreated-a	495	509	523	1.8339	0.98514	2.3512	1.3006	1020	882	1068	930	744	972	870	966	0.0057427	0.0062349	1098	0.0052794	1.3766	2.8068	0.57305
untreated-a	496	507	526	2.0259	0.81807	2.804	1.1427	1020	882	1074	936	744	972	858	966	0.0067816	0.0067742	1086	0.0059094	1.5719	3.0598	0.54975
untreated-a	509	522	537	1.9603	1.079	2.7437	1.5046	1104	1008	1158	1062	870	1074	972	1068	0.0066165	0.0057427	1182	0.0064705	1.71	3.3127	0.47918
untreated-a	509	523	542	1.6366	0.91695	2.4156	1.1756	1146	1020	1218	1068	870	1104	972	1098	0.0052794	0.0057427	1248	0.0057694	1.3738	3.0003	0.54179
untreated-a	522	537	558	1.895	0.98016	2.6779	1.3719	1206	1104	1260	1158	972	1188	1074	1182	0.0064705	0.0066165	1278	0.0071426	1.7041	3.1203	0.50323
untreated-a	537	558	565	2.155	0.94748	2.7435	1.3389	1326	1206	1368	1260	1074	1284	1188	1278	0.0071426	0.0064705	1386	0.0070417	1.4426	3.2373	0.54034
untreated-a	558	565	577	1.83	1.0775	2.6713	1.3717	1428	1326	1482	1368	1188	1392	1284	1386	0.0070417	0.0071426	1494	0.0060798	1.7678	2.9984	0.54391
untreated-a	558	565	578	2.1537	1.0775	2.8138	1.3717	1452	1326	1500	1368	1188	1392	1284	1386	0.0070417	0.0071426	1530	0.0062185	1.5066	3.4542	0.50461
untreated-a	565	577	594	1.8355	0.915	2.6133	1.3357	1524	1428	1584	1482	1284	1500	1392	1494	0.0060798	0.0070417	1602	0.0065179	1.5763	3.0645	0.50263
untreated-a	647	667	689	1.8406	0.94706	2.7952	1.374	2034	1932	2094	1980	1800	2010	1902	2004	0.0069947	0.006632	2112	0.0064941	1.6333	3.0444	0.52935
untreated-a	647	667	690	2.0228	0.94706	2.7295	1.374	2046	1932	2088	1980	1800	2010	1902	2004	0.0069947	0.006632	2112	0.0068028	1.6322	3.2006	0.53355
untreated-a	647	666	694	2.0232	1.0453	2.8545	1.5362	2034	1932	2094	1998	1800	2016	1902	2010	0.0059528	0.006632	2118	0.0068591	1.6375	3.3747	0.50544
untreated-a	647	666	695	1.513	1.0453	2.2122	1.5362	2022	1932	2076	1998	1800	2016	1902	2010	0.0059528	0.006632	2118	0.0073017	1.4383	3.0539	0.54958
untreated-a	666	695	719	1.7668	0.7565	2.4766	1.1061	2142	2022	2190	2076	1902	2124	2016	2118	0.0073017	0.0059528	2220	0.0075733	1.5767	3.138	0.51645
untreated-a	695	719	739	1.8993	0.8834	2.4778	1.2383	2256	2142	2310	2190	2016	2226	2124	2220	0.0075733	0.0073017	2340	0.006365	1.5116	3.1794	0.48246
untreated-a	825	832	838	1.8348	0.75253	2.996	1.3606	876	774	942	834	672	846	762	840	0.010033	0.007943	942	0.0070605	1.4482	2.996	0.5081
untreated-a	1305	1314	1333	1.8936	0.94751	2.6652	1.4722	822	726	870	786	606	798	696	792	0.0078125	0.0085289	882	0.0071285	1.6997	3.0027	0.49189
untreated-a	1305	1314	1334	1.6998	0.94751	2.797	1.4722	828	726	888	786	606	798	696	792	0.0078125	0.0085289	894	0.007489	1.445	2.8528	0.50156
untreated-a	1305	1315	1336	1.7638	0.81842	2.3542	1.2083	816	720	864	768	606	798	696	792	0.0080625	0.0085289	894	0.0064239	1.6379	2.9328	0.52096
untreated-a	1314	1333	1352	1.6354	0.9468	2.4757	1.3326	930	822	978	870	696	888	798	882	0.0071285	0.0078125	1002	0.0069633	1.442	2.921	0.46884
untreated-a	1315	1336	1357	1.8958	0.88189	2.6145	1.1771	942	816	996	864	696	900	798	894	0.0064239	0.0080625	1014	0.0067883	1.3115	3.051	0.49814
untreated-a	97	114	117	1.6998	0.88301	2.2824	1.1448	1158	1044	1206	1086	888	1116	1020	1110	0.0070637	0.0058288	1242	0.0064462	1.3745	3.0437	0.60103
untreated-a	97	114	118	1.6365	0.88301	2.289	1.1448	1146	1044	1200	1086	888	1116	1020	1110	0.0070637	0.0058288	1218	0.0061686	1.4434	2.6664	0.56896
untreated-a	97	113	121	1.7638	0.81812	2.2911	1.172	1170	1044	1218	1098	888	1140	1020	1134	0.0061395	0.0058288	1242	0.0066583	1.4398	2.8667	0.58794
untreated-a	97	113	122	1.7654	0.81812	2.4888	1.172	1182	1044	1230	1098	888	1140	1020	1134	0.0061395	0.0058288	1254	0.0067771	1.3753	2.9877	0.52748
untreated-a	114	118	131	1.7015	0.81823	2.222	1.1445	1272	1146	1326	1200	1020	1224	1116	1218	0.0061686	0.0070637	1362	0.0056668	1.2456	2.8764	0.55602
untreated-a	114	117	135	1.766	0.84989	2.4137	1.1412	1278	1158	1326	1206	1020	1248	1116	1242	0.0064462	0.0070637	1362	0.0061729	1.5092	3.0591	0.58845
untreated-a	114	117	136	1.5748	0.84989	2.2273	1.1412	1260	1158	1308	1206	1020	1248	1116	1242	0.0064462	0.0070637	1344	0.0066345	1.5103	2.7442	0.63695
untreated-a	113	122	140	1.966	0.88269	2.6689	1.2444	1302	1182	1350	1230	1020	1260	1140	1254	0.0067771	0.0061395	1362	0.0067584	1.5079	3.1143	0.55364
untreated-a	117	136	143	1.5761	0.78742	2.0884	1.1137	1368	1260	1416	1308	1116	1350	1248	1344	0.0066345	0.0064462	1458	0.0063737	1.4479	2.8761	0.6177
untreated-a	117	136	144	1.7678	0.78742	2.4781	1.1137	1386	1260	1440	1308	1116	1350	1248	1344	0.0066345	0.0064462	1470	0.0067859	1.3777	3.0604	0.53981
untreated-a	117	135	149	1.5295	0.88301	2.219	1.2068	1362	1278	1422	1326	1116	1368	1248	1362	0.0061729	0.0064462	1452	0.0081179	1.5067	2.9245	0.5923
untreated-a	117	135	150	1.5662	0.88301	2.1556	1.2068	1380	1278	1428	1326	1116	1368	1248	1362	0.0061729	0.0064462	1464	0.0060624	1.5751	2.7463	0.55375
untreated-a	118	131	152	1.8318	0.85077	2.62	1.111	1410	1272	1464	1326	1116	1368	1224	1362	0.0056668	0.0061686	1482	0.0066607	1.4416	3.1129	0.47248
untreated-a	136	143	157	1.5714	0.78806	2.2793	1.0442	1488	1368	1530	1416	1248	1464	1350	1458	0.0063737	0.0066345	1560	0.0074997	1.4408	2.8637	0.58234
untreated-a	136	143	158	1.3103	0.78806	1.897	1.0442	1482	1368	1530	1416	1248	1464	1350	1458	0.0063737	0.0066345	1572	0.0071135	1.3098	2.6126	0.61885
untreated-a	135	150	160	1.7706	0.78312	2.4728	1.0778	1524	1380	1578	1428	1248	1470	1368	1464	0.0060624	0.0061729	1608	0.0063537	1.3074	3.1163	0.54894
untreated-a	136	144	161	1.7665	0.88388	2.475	1.2391	1500	1386	1548	1440	1248	1476	1350	1470	0.0067859	0.0066345	1572	0.00661	1.5677	2.9429	0.58149
untreated-a	136	144	162	1.3749	0.88388	2.0301	1.2391	1476	1386	1530	1440	1248	1476	1350	1470	0.0067859	0.0066345	1566	0.0081302	1.3749	2.7976	0.51811
untreated-a	143	157	165	1.5013	0.7857	2.3499	1.1396	1578	1488	1632	1530	1350	1566	1464	1560	0.0074997	0.0063737	1662	0.0074858	1.5099	2.9334	0.52342
untreated-a	143	158	170	1.6364	0.65514	2.2185	0.94849	1620	1482	1668	1530	1350	1578	1464	1572	0.0071135	0.0063737	1704	0.0062616	1.3153	2.742	0.63639
untreated-a	157	165	180	1.57	0.75065	2.3515	1.175	1692	1578	1752	1632	1464	1668	1566	1662	0.0074858	0.0074997	1776	0.0069143	1.3752	2.9332	0.53674
untreated-a	223	237	251	1.698	0.84725	2.4202	1.2372	2298	2178	2346	2226	2022	2250	2130	2244	0.0065919	0.0064259	2370	0.0068726	1.3153	2.8761	0.53018
untreated-a	223	237	252	1.8262	0.84725	2.352	1.2372	2298	2178	2340	2226	2022	2250	2130	2244	0.0065919	0.0064259	2382	0.0053996	1.4432	3.0587	0.53383
untreated-a	224	239	255	1.6395	0.75467	2.1633	1.0456	2310	2172	2364	2226	2022	2268	2130	2262	0.0065153	0.007141	2400	0.005565	1.2428	2.6161	0.60158
untreated-a	383	400	403	1.6998	0.88301	2.2824	1.1448	1158	1044	1206	1086	888	1116	1020	1110	0.0070637	0.0058288	1242	0.0064462	1.3745	3.0437	0.60103
untreated-a	383	400	404	1.6365	0.88301	2.289	1.1448	1146	1044	1200	1086	888	1116	1020	1110	0.0070637	0.0058288	1218	0.0061686	1.4434	2.6664	0.56896
untreated-a	383	399	407	1.7638	0.81812	2.2911	1.172	1170	1044	1218	1098	888	1140	1020	1134	0.0061395	0.0058288	1242	0.0066583	1.4398	2.8667	0.58794
untreated-a	383	399	408	1.7654	0.81812	2.4888	1.172	1182	1044	1230	1098	888	1140	1020	1134	0.0061395	0.0058288	1254	0.0067771	1.3753	2.9877	0.52748
untreated-a	400	404	417	1.7015	0.81823	2.222	1.1445	1272	1146	1326	1200	1020	1224	1116	1218	0.0061686	0.0070637	1362	0.0056668	1.2456	2.8764	0.55602
untreated-a	400	403	421	1.766	0.84989	2.4137	1.1412	1278	1158	1326	1206	1020	1248	1116	1242	0.0064462	0.0070637	1362	0.0061729	1.5092	3.0591	0.58845
untreated-a	400	403	422	1.5748	0.84989	2.2273	1.1412	1260	1158	1308	1206	1020	1248	1116	1242	0.0064462	0.0070637	1344	0.0066345	1.5103	2.7442	0.63695
untreated-a	399	408	426	1.966	0.88269	2.6689	1.2444	1302	1182	1350	1230	1020	1260	1140	1254	0.0067771	0.0061395	1362	0.0067584	1.5079	3.1143	0.55364
untreated-a	403	422	429	1.5761	0.78742	2.0884	1.1137	1368	1260	1416	1308	1116	1350	1248	1344	0.0066345	0.0064462	1458	0.0063737	1.4479	2.8761	0.6177
untreated-a	403	422	430	1.7678	0.78742	2.4781	1.1137	1386	1260	1440	1308	1116	1350	1248	1344	0.0066345	0.0064462	1470	0.0067859	1.3777	3.0604	0.53981
untreated-a	403	421	435	1.5295	0.88301	2.219	1.2068	1362	1278	1422	1326	1116	1368	1248	1362	0.0061729	0.0064462	1452	0.0081179	1.5067	2.9245	0.5923
untreated-a	403	421	436	1.5662	0.88301	2.1556	1.2068	1380	1278	1428	1326	1116	1368	1248	1362	0.0061729	0.0064462	1464	0.0060624	1.5751	2.7463	0.55375
untreated-a	404	417	438	1.8318	0.85077	2.62	1.111	1410	1272	1464	1326	1116	1368	1224	1362	0.0056668	0.0061686	1482	0.0066607	1.4416	3.1129	0.47248
untreated-a	422	429	443	1.5714	0.78806	2.2793	1.0442	1488	1368	1530	1416	1248	1464	1350	1458	0.0063737	0.0066345	1560	0.0074997	1.4408	2.8637	0.58234
untreated-a	422	429	444	1.3103	0.78806	1.897	1.0442	1482	1368	1530	1416	1248	1464	1350	1458	0.0063737	0.0066345	1572	0.0071135	1.3098	2.6126	0.61885
untreated-a	421	436	446	1.7706	0.78312	2.4728	1.0778	1524	1380	1578	1428	1248	1470	1368	1464	0.0060624	0.0061729	1608	0.0063537	1.3074	3.1163	0.54894
untreated-a	422	430	447	1.7665	0.88388	2.475	1.2391	1500	1386	1548	1440	1248	1476	1350	1470	0.0067859	0.0066345	1572	0.00661	1.5677	2.9429	0.58149
untreated-a	422	430	448	1.3749	0.88388	2.0301	1.2391	1476	1386	1530	1440	1248	1476	1350	1470	0.0067859	0.0066345	1566	0.0081302	1.3749	2.7976	0.51811
untreated-a	429	443	451	1.5013	0.7857	2.3499	1.1396	1578	1488	1632	1530	1350	1566	1464	1560	0.0074997	0.0063737	1662	0.0074858	1.5099	2.9334	0.52342
untreated-a	429	444	456	1.6364	0.65514	2.2185	0.94849	1620	1482	1668	1530	1350	1578	1464	1572	0.0071135	0.0063737	1704	0.0062616	1.3153	2.742	0.63639
untreated-a	443	451	466	1.57	0.75065	2.3515	1.175	1692	1578	1752	1632	1464	1668	1566	1662	0.0074858	0.0074997	1776	0.0069143	1.3752	2.9332	0.53674
untreated-a	509	523	537	1.698	0.84725	2.4202	1.2372	2298	2178	2346	2226	2022	2250	2130	2244	0.0065919	0.0064259	2370	0.0068726	1.3153	2.8761	0.53018
untreated-a	509	523	538	1.8262	0.84725	2.352	1.2372	2298	2178	2340	2226	2022	2250	2130	2244	0.0065919	0.0064259	2382	0.0053996	1.4432	3.0587	0.53383
untreated-a	510	525	541	1.6395	0.75467	2.1633	1.0456	2310	2172	2364	2226	2022	2268	2130	2262	0.0065153	0.007141	2400	0.005565	1.2428	2.6161	0.60158
untreated-a	706	726	743	1.4369	0.7534	1.9601	1.0113	1398	1290	1440	1338	1110	1380	1248	1374	0.0062077	0.0056244	1476	0.0066936	1.3865	2.608	0.59749
untreated-a	706	726	744	1.5131	0.7534	1.9636	1.0113	1416	1290	1464	1338	1110	1380	1248	1374	0.0062077	0.0056244	1506	0.0059455	1.1157	2.546	0.56574
untreated-a	715	729	745	1.7631	0.88466	2.6153	1.2434	1434	1314	1482	1368	1128	1392	1254	1386	0.0059844	0.0060901	1500	0.0071389	1.3754	3.0388	0.55953
untreated-a	726	744	757	1.5071	0.75654	2.4138	0.98178	1530	1416	1584	1464	1248	1512	1380	1506	0.0059455	0.0062077	1602	0.0087997	1.1176	2.7512	0.52349
untreated-a	758	775	788	1.5741	0.7192	2.0228	0.97779	1824	1686	1866	1734	1518	1776	1638	1770	0.0060765	0.0057984	1908	0.0063184	1.1824	2.7272	0.6049
untreated-a	960	980	992	1.8299	0.94716	2.614	1.4029	900	804	954	852	654	882	750	876	0.0074332	0.0074604	978	0.0069882	1.6323	3.2471	0.54099
untreated-a	960	981	993	1.8314	1.0118	2.4814	1.3374	912	810	966	858	654	888	750	882	0.0062794	0.0074604	1002	0.0066855	1.5664	3.3777	0.52008
untreated-a	960	981	994	2.0326	1.0118	2.8509	1.3374	930	810	984	858	654	888	750	882	0.0062794	0.0074604	996	0.0061928	1.644	3.1303	0.51688
untreated-a	981	994	1011	1.6976	1.0163	2.1647	1.4255	1026	930	1068	984	750	1002	888	996	0.0061928	0.0062794	1104	0.0064892	1.5079	2.8731	0.54986
untreated-a	981	994	1012	2.0863	1.0163	2.9858	1.4255	1044	930	1098	984	750	1002	888	996	0.0061928	0.0062794	1110	0.006598	1.6411	3.2991	0.51411
untreated-a	981	993	1015	1.7636	0.91568	2.8678	1.2407	1032	912	1092	966	750	1008	888	1002	0.0066855	0.0062794	1110	0.0074829	1.5014	3.2541	0.54561
untreated-a	994	1011	1024	1.7652	0.8488	2.8039	1.0824	1140	1026	1194	1068	888	1110	1002	1104	0.0064892	0.0061928	1212	0.0078828	1.4409	3.2593	0.52158
untreated-a	994	1011	1025	1.5055	0.8488	2.4196	1.0824	1122	1026	1194	1068	888	1110	1002	1104	0.0064892	0.0061928	1212	0.0072731	1.382	2.9374	0.55205
untreated-a	994	1012	1028	2.0361	1.0432	2.6745	1.4929	1158	1044	1206	1098	888	1116	1002	1110	0.006598	0.0061928	1236	0.0058988	1.7003	3.3216	0.54468
untreated-a	994	1012	1030	1.8336	1.0432	2.5994	1.4929	1152	1044	1212	1098	888	1116	1002	1110	0.006598	0.0061928	1230	0.0056825	1.5753	2.9842	0.50751
untreated-a	1011	1025	1041	1.8959	0.75277	2.6803	1.2098	1266	1122	1314	1194	1002	1218	1110	1212	0.0072731	0.0064892	1338	0.0068458	1.4454	3.14	0.58168
untreated-a	1011	1025	1042	1.8285	0.75277	2.4853	1.2098	1272	1122	1326	1194	1002	1218	1110	1212	0.0072731	0.0064892	1350	0.0056839	1.3781	2.9337	0.54054
untreated-a	1012	1028	1045	1.8323	1.018	2.4049	1.3372	1272	1158	1320	1206	1002	1242	1116	1236	0.0058988	0.006598	1356	0.0058677	1.6327	3.1239	0.47494
untreated-a	1012	1028	1046	2.0872	1.018	2.923	1.3372	1290	1158	1344	1206	1002	1242	1116	1236	0.0058988	0.006598	1362	0.0061175	1.7035	3.3642	0.54256
untreated-a	1025	1041	1054	1.7631	0.94797	2.4192	1.3402	1368	1266	1416	1314	1110	1344	1218	1338	0.0068458	0.0072731	1434	0.0076533	1.4417	2.9361	0.54603
untreated-a	1025	1042	1058	1.831	0.91424	2.3502	1.2426	1392	1272	1446	1326	1110	1356	1218	1350	0.0056839	0.0072731	1488	0.0055245	1.4439	3.067	0.56077
untreated-a	1028	1045	1059	1.7702	0.91613	2.4737	1.2024	1386	1272	1440	1320	1116	1362	1242	1356	0.0058677	0.0058988	1470	0.0066386	1.571	3.0555	0.46356
untreated-a	1028	1046	1061	1.8912	1.0436	2.6728	1.4615	1392	1290	1452	1344	1116	1368	1242	1362	0.0061175	0.0058988	1476	0.0057727	1.765	3.1129	0.53922
untreated-a	1042	1058	1073	1.7042	0.91551	2.4771	1.1751	1518	1392	1566	1446	1218	1494	1356	1488	0.0055245	0.0056839	1608	0.0067252	1.5002	3.1906	0.55427
untreated-a	1042	1058	1074	1.7649	0.91551	2.3454	1.1751	1518	1392	1566	1446	1218	1494	1356	1488	0.0055245	0.0056839	1596	0.0063263	1.5741	2.9427	0.5641
untreated-a	1058	1074	1084	1.7031	0.88246	2.4782	1.1727	1632	1518	1680	1566	1356	1602	1494	1596	0.0063263	0.0055245	1698	0.0076148	1.3729	2.8706	0.56807
untreated-a	1074	1084	1109	1.8336	0.85154	2.6066	1.2391	1728	1632	1770	1680	1494	1704	1602	1698	0.0076148	0.0063263	1806	0.00863	1.4426	3.4356	0.51252
untreated-a	1134	1147	1164	2.0348	0.85119	3.0655	1.307	2142	1998	2196	2058	1848	2076	1938	2070	0.0061077	0.0065534	2220	0.0071801	1.372	3.6501	0.53082
untreated-a	1134	1148	1168	1.7663	0.8825	2.2866	1.2082	2130	2004	2178	2052	1848	2088	1938	2082	0.0057257	0.0065534	2214	0.0054447	1.517	2.9297	0.49932
untreated-a	1148	1168	1182	1.8945	0.88315	2.5216	1.1433	2274	2130	2328	2178	1938	2220	2088	2214	0.0054447	0.0057257	2364	0.0051326	1.4443	3.1008	0.51881
untreated-a	1405	1417	1433	1.6383	0.81859	2.2872	1.1131	1458	1326	1506	1380	1218	1410	1308	1404	0.0072047	0.007294	1548	0.0064175	1.3183	2.9919	0.54213
untreated-a	1437	1448	1467	2.0246	0.88185	2.7404	1.2775	1692	1578	1740	1626	1428	1668	1548	1662	0.0074322	0.0064176	1758	0.0067	1.7009	3.1827	0.56989
untreated-a	1437	1448	1468	1.8376	0.88185	2.6203	1.2775	1692	1578	1746	1626	1428	1668	1548	1662	0.0074322	0.0064176	1776	0.0068673	1.5668	3.3798	0.54465
untreated-a	1436	1453	1473	1.8357	0.94861	2.4123	1.2405	1716	1602	1764	1650	1428	1680	1560	1674	0.0064131	0.0069503	1800	0.0062603	1.5058	3.1329	0.49054
untreated-a	1436	1453	1474	1.9605	0.94861	2.4237	1.2405	1716	1602	1764	1650	1428	1680	1560	1674	0.0064131	0.0069503	1788	0.0055196	1.5733	2.9314	0.55976
untreated-a	1448	1467	1483	1.9609	1.0123	2.6803	1.3702	1794	1692	1848	1740	1548	1764	1668	1758	0.0067	0.0074322	1890	0.0064041	1.6347	3.6288	0.49965
untreated-a	1453	1474	1489	1.83	0.98023	2.5509	1.2118	1842	1716	1896	1764	1560	1794	1680	1788	0.0055196	0.0064131	1926	0.0064151	1.4471	3.2046	0.57428
untreated-a	1722	1736	1753	1.5057	0.91495	2.2168	1.1756	1272	1176	1332	1224	996	1254	1122	1248	0.005994	0.0058264	1356	0.0068867	1.3137	2.6711	0.52527
untreated-a	1723	1741	1756	1.8324	0.94784	2.5427	1.3402	1296	1188	1338	1236	996	1260	1140	1254	0.006658	0.0056049	1362	0.007443	1.4475	3.0455	0.52799
untreated-a	1723	1741	1757	1.8375	0.94784	2.5522	1.3402	1290	1188	1338	1236	996	1260	1140	1254	0.006658	0.0056049	1356	0.0066966	1.5723	3.0559	0.50211
untreated-a	1741	1757	1759	1.9633	0.91873	2.8108	1.2761	1392	1290	1446	1338	1140	1362	1260	1356	0.0066966	0.006658	1452	0.0072352	1.5081	2.9391	0.46112
untreated-a	1741	1757	1760	1.8917	0.91873	2.5586	1.2761	1416	1290	1458	1338	1140	1362	1260	1356	0.0066966	0.006658	1488	0.0063873	1.374	3.1626	0.51107
untreated-a	1736	1753	1761	1.5728	0.75283	2.2199	1.1084	1386	1272	1434	1332	1122	1362	1254	1356	0.0068867	0.005994	1464	0.0078658	1.3168	2.9262	0.5236
untreated-a	1757	1760	1778	1.5051	0.94587	2.4105	1.2793	1506	1416	1566	1458	1260	1494	1362	1488	0.0063873	0.0066966	1596	0.0071801	1.504	2.9357	0.55364
untreated-a	1757	1760	1779	1.5753	0.94587	2.2236	1.2793	1506	1416	1566	1458	1260	1494	1362	1488	0.0063873	0.0066966	1590	0.0065509	1.4431	2.7347	0.54817
untreated-a	1760	1779	1791	1.7047	0.78763	2.2785	1.1118	1638	1506	1686	1566	1362	1596	1494	1590	0.0065509	0.0063873	1716	0.0064442	1.383	2.7485	0.5165
untreated-a	1760	1779	1792	1.6394	0.78763	2.2875	1.1118	1626	1506	1674	1566	1362	1596	1494	1590	0.0065509	0.0063873	1704	0.0066907	1.3822	2.8677	0.50471
untreated-a	1760	1778	1794	1.895	0.75255	2.4772	1.2052	1662	1506	1710	1566	1362	1602	1494	1596	0.0071801	0.0063873	1740	0.0062818	1.3081	3.253	0.52847
untreated-a	1779	1792	1803	1.8287	0.8197	2.5462	1.1438	1758	1626	1812	1674	1494	1710	1596	1704	0.0066907	0.0065509	1836	0.0063323	1.3828	3.0606	0.54245
untreated-a	1779	1791	1805	1.836	0.85236	2.4109	1.1393	1770	1638	1812	1686	1494	1722	1596	1716	0.0064442	0.0065509	1842	0.0063642	1.4419	2.9962	0.51099
untreated-a	1779	1791	1806	1.6998	0.85236	2.3441	1.1393	1764	1638	1818	1686	1494	1722	1596	1716	0.0064442	0.0065509	1836	0.0060404	1.4437	2.7411	0.55572
untreated-a	1791	1805	1821	1.8261	0.91802	2.8589	1.2055	1902	1770	1974	1812	1596	1848	1722	1842	0.0063642	0.0064442	1998	0.0062373	1.3855	3.3806	0.53013
untreated-a	1791	1805	1822	2.0239	0.91802	2.7415	1.2055	1890	1770	1938	1812	1596	1848	1722	1842	0.0063642	0.0064442	1956	0.0067591	1.5715	3.2677	0.50568
untreated-a	1805	1822	1828	2.0892	1.012	2.8548	1.3708	1986	1890	2028	1938	1722	1962	1848	1956	0.0067591	0.0063642	2040	0.0076501	1.7672	3.2323	0.50363
untreated-a	1805	1821	1834	1.8916	0.91305	2.6159	1.4294	2076	1902	2124	1974	1722	2004	1848	1998	0.0062373	0.0063642	2148	0.0063268	1.256	3.1258	0.5248
untreated-a	1822	1828	1838	1.8331	1.0446	2.5446	1.4274	2070	1986	2118	2028	1848	2046	1962	2040	0.0076501	0.0067591	2142	0.0074454	1.5075	3.1162	0.51067
untreated-a	2039	2048	2068	1.837	0.81591	2.4731	1.1754	1164	1026	1212	1086	870	1122	972	1116	0.0053777	0.0063421	1254	0.0061258	1.4475	3.1911	0.52464
untreated-a	2048	2068	2092	1.7018	0.91848	2.598	1.2366	1278	1164	1338	1212	972	1260	1122	1254	0.0061258	0.0053777	1362	0.006521	1.5739	3.0047	0.52269
untreated-a	2091	2104	2119	1.7025	0.94753	2.2787	1.3037	1530	1428	1578	1476	1260	1512	1380	1506	0.0061609	0.0059162	1602	0.0065958	1.5707	2.8071	0.53246
untreated-a	2106	2116	2122	1.7718	0.88548	2.8648	1.2077	1638	1524	1698	1572	1386	1602	1506	1596	0.0071035	0.0064238	1704	0.007168	1.5111	3.0608	0.49218
untreated-a	2116	2122	2136	1.6331	0.8859	2.3992	1.4324	1734	1638	1788	1698	1506	1710	1602	1704	0.007168	0.0071035	1824	0.0069524	1.3755	3.0071	0.51729
untreated-a	2122	2136	2145	1.8261	0.81655	2.5467	1.1996	1872	1734	1914	1788	1602	1830	1710	1824	0.0069524	0.007168	1932	0.0073505	1.4439	2.9234	0.55947
untreated-a	2343	2358	2379	1.6356	0.85244	2.3476	1.1723	936	828	990	876	684	906	780	900	0.0066019	0.0072878	1020	0.0064686	1.3751	2.9309	0.50671
untreated-a	2343	2358	2381	1.6404	0.85244	2.4218	1.1723	942	828	1002	876	684	906	780	900	0.0066019	0.0072878	1014	0.0068216	1.309	2.7423	0.52409
untreated-a	2344	2363	2382	1.77	0.78553	2.4164	1.0761	942	822	996	870	684	906	792	900	0.0069855	0.0073619	1014	0.0066792	1.3806	2.8669	0.46521
untreated-a	2358	2381	2399	1.8294	0.82022	2.4816	1.2109	1062	942	1110	1002	780	1020	906	1014	0.0068216	0.0066019	1134	0.0066454	1.4441	2.9856	0.5272
untreated-a	2358	2381	2400	1.6335	0.82022	2.3499	1.2109	1068	942	1116	1002	780	1020	906	1014	0.0068216	0.0066019	1140	0.0072553	1.1836	2.8781	0.50272
untreated-a	2358	2379	2406	1.5725	0.8178	2.3465	1.1738	1044	936	1098	990	780	1026	906	1020	0.0064686	0.0066019	1134	0.0073122	1.3715	2.9943	0.53639
untreated-a	2381	2400	2429	1.9665	0.81675	2.938	1.175	1182	1068	1230	1116	906	1146	1020	1140	0.0072553	0.0068216	1242	0.0082	1.5689	3.3815	0.52276
untreated-a	2381	2400	2430	1.7014	0.81675	2.224	1.175	1182	1068	1224	1116	906	1146	1020	1140	0.0072553	0.0068216	1248	0.0077649	1.251	2.8176	0.50632
untreated-a	2400	2430	2449	1.7041	0.8507	2.8546	1.112	1284	1182	1350	1224	1020	1254	1146	1248	0.0077649	0.0072553	1356	0.0074185	1.4468	2.9909	0.49457
untreated-a	2400	2430	2450	1.7577	0.8507	2.5426	1.112	1296	1182	1344	1224	1020	1254	1146	1248	0.0077649	0.0072553	1368	0.0073904	1.3738	3.0506	0.45562
untreated-a	2430	2449	2462	1.896	0.85204	2.6122	1.4273	1404	1284	1446	1350	1146	1362	1254	1356	0.0074185	0.0077649	1482	0.0069661	1.5731	3.3218	0.48625
untreated-a	2430	2450	2463	1.6394	0.87883	2.5409	1.2713	1398	1296	1458	1344	1146	1374	1254	1368	0.0073904	0.0077649	1464	0.007131	1.4433	2.7234	0.48559
untreated-a	2450	2463	2471	1.5675	0.81972	2.1691	1.2705	1518	1398	1572	1458	1254	1470	1374	1464	0.007131	0.0073904	1602	0.0056143	1.2452	2.6596	0.47333
untreated-a	2450	2463	2472	1.7667	0.81972	2.7338	1.2705	1512	1398	1566	1458	1254	1470	1374	1464	0.007131	0.0073904	1584	0.007514	1.4471	3.1588	0.41412
untreated-a	2449	2462	2475	1.7684	0.94801	2.4119	1.3061	1506	1404	1554	1446	1254	1488	1362	1482	0.0069661	0.0074185	1572	0.0064657	1.7025	2.7937	0.51131
untreated-a	2449	2462	2476	1.834	0.94801	2.4746	1.3061	1506	1404	1548	1446	1254	1488	1362	1482	0.0069661	0.0074185	1566	0.006965	1.7	2.9124	0.53677
untreated-a	2462	2476	2480	1.7693	0.917	2.3473	1.2373	1608	1506	1656	1548	1362	1572	1488	1566	0.006965	0.0069661	1674	0.0063523	1.3732	2.6646	0.42966
untreated-a	2462	2475	2483	1.7681	0.88422	2.6153	1.2059	1620	1506	1668	1554	1362	1578	1488	1572	0.0064657	0.0069661	1692	0.0072316	1.4475	3.1793	0.49529
untreated-a	2462	2475	2484	1.6996	0.88422	2.228	1.2059	1608	1506	1656	1554	1362	1578	1488	1572	0.0064657	0.0069661	1686	0.0065909	1.4525	2.8672	0.48226
untreated-a	2463	2471	2489	1.7064	0.78377	2.7978	1.0846	1656	1518	1710	1572	1374	1608	1470	1602	0.0056143	0.007131	1740	0.0075019	1.3189	2.9089	0.3694
untreated-a	2476	2480	2493	2.012	0.88466	2.6829	1.1736	1716	1608	1764	1656	1488	1680	1572	1674	0.0063523	0.006965	1782	0.006588	1.3757	3.0615	0.48104
untreated-a	2475	2484	2495	1.6351	0.8498	2.349	1.114	1710	1608	1764	1656	1488	1692	1578	1686	0.0065909	0.0064657	1812	0.00719	1.3751	3.3666	0.45451
untreated-a	2541	2559	2573	1.5822	0.82012	2.1561	1.2416	2220	2160	2262	2184	2040	2214	2148	2208	0.011187	0.0055058	2298	0.007548	1.4394	2.7356	0.47599
untreated-a	3112	3129	3145	1.7001	0.78386	2.4802	1.1769	1140	1050	1188	1098	906	1116	1014	1110	0.0081646	0.0069567	1212	0.0081181	1.2458	2.8701	0.47752
untreated-a	3112	3128	3154	2.0289	0.75247	2.6101	1.172	1188	1050	1230	1110	906	1134	1014	1128	0.0068759	0.0069567	1260	0.0061854	1.447	3.1166	0.49818
untreated-a	3112	3128	3155	1.5724	0.75247	2.0935	1.172	1164	1050	1212	1110	906	1134	1014	1128	0.0068759	0.0069567	1242	0.0070769	1.3114	2.7473	0.47187
untreated-a	3129	3145	3162	1.6363	0.85005	2.1577	1.2401	1242	1140	1290	1188	1014	1218	1116	1212	0.0081181	0.0081646	1320	0.0063989	1.3712	2.7336	0.50249
untreated-a	3129	3145	3163	1.9571	0.85005	2.7268	1.2401	1266	1140	1320	1188	1014	1218	1116	1212	0.0081181	0.0081646	1332	0.0067263	1.5097	3.1886	0.46345
untreated-a	3128	3155	3174	1.6331	0.7862	2.4249	1.0467	1290	1164	1338	1212	1014	1248	1134	1242	0.0070769	0.0068759	1350	0.0071047	1.3083	2.6662	0.49403
untreated-a	3128	3155	3175	1.7656	0.7862	2.4218	1.0467	1284	1164	1332	1212	1014	1248	1134	1242	0.0070769	0.0068759	1344	0.0072903	1.3096	2.7272	0.51023
untreated-a	3145	3162	3188	1.8323	0.81815	2.7267	1.0789	1386	1242	1452	1290	1116	1326	1218	1320	0.0063989	0.0081181	1476	0.0059755	1.4401	3.3105	0.47865
untreated-a	3155	3174	3198	1.6356	0.81654	2.5475	1.2125	1398	1290	1458	1338	1134	1356	1248	1350	0.0071047	0.0070769	1476	0.0073683	1.317	3.0082	0.46054
untreated-a	3144	3176	3203	1.7669	0.88528	2.6203	1.1416	1434	1308	1488	1356	1116	1404	1248	1398	0.0055995	0.0055507	1506	0.0070709	1.5064	2.9957	0.49438
untreated-a	3144	3176	3204	1.7682	0.88528	2.2838	1.1416	1452	1308	1500	1356	1116	1404	1248	1398	0.0055995	0.0055507	1536	0.0057177	1.3845	2.9283	0.57094
untreated-a	3176	3204	3220	1.8326	0.88409	2.5315	1.1419	1596	1452	1650	1500	1248	1542	1404	1536	0.0057177	0.0055995	1674	0.0059936	1.3129	2.9373	0.55533
untreated-a	3508	3518	3544	1.9655	0.75353	2.6671	1.2058	1038	894	1080	954	780	984	870	978	0.0077082	0.0073658	1110	0.0074839	1.3736	3.3258	0.46563
untreated-a	3509	3532	3546	1.5093	0.81945	2.0909	1.1758	1008	906	1062	954	780	984	894	978	0.0076083	0.0071728	1086	0.0066443	1.3178	2.5485	0.52505
untreated-a	3510	3519	3548	1.7648	0.81891	2.4139	1.1455	1056	912	1104	966	780	1002	870	996	0.0058345	0.0076784	1128	0.0058762	1.309	2.8055	0.51384
untreated-a	3532	3546	3562	1.5705	0.75463	2.2825	1.0454	1128	1008	1182	1062	894	1092	984	1086	0.0066443	0.0076083	1206	0.0062807	1.311	2.6143	0.54688
untreated-a	3532	3546	3563	1.5118	0.75463	2.2874	1.0454	1116	1008	1176	1062	894	1092	984	1086	0.0066443	0.0076083	1206	0.0072085	1.3135	2.8615	0.5188
untreated-a	3546	3562	3586	1.6332	0.78523	2.2217	1.1413	1242	1128	1296	1182	984	1212	1092	1206	0.0062807	0.0066443	1314	0.0061277	1.3771	2.5427	0.52011
untreated-a	3546	3562	3587	1.374	0.78523	2.4096	1.1413	1242	1128	1314	1182	984	1212	1092	1206	0.0062807	0.0066443	1320	0.0074048	1.1834	2.5503	0.50421
untreated-a	3546	3563	3588	1.898	0.75588	2.5437	1.1437	1248	1116	1296	1176	984	1212	1092	1206	0.0072085	0.0066443	1308	0.0065967	1.5725	2.8531	0.52974
untreated-a	3563	3588	3606	1.9044	0.94902	2.6202	1.2719	1374	1248	1422	1296	1092	1314	1212	1308	0.0065967	0.0072085	1440	0.0063068	1.4529	3.0588	0.47936
untreated-a	3562	3586	3608	1.7622	0.8166	2.348	1.1108	1374	1242	1416	1296	1092	1320	1212	1314	0.0061277	0.0062807	1458	0.0060201	1.3831	3.0003	0.54478
untreated-a	3674	3699	3715	1.7021	0.84695	2.4127	1.2066	1962	1830	2010	1890	1698	1914	1806	1908	0.0063787	0.0064834	2034	0.0067462	1.249	2.8125	0.4918
untreated-a	3674	3699	3716	1.7603	0.84695	2.7338	1.2066	1938	1830	1998	1890	1698	1914	1806	1908	0.0063787	0.0064834	2010	0.0068473	1.5738	2.8583	0.529
untreated-a	3675	3701	3717	1.6337	0.75424	2.2812	1.2396	1938	1830	1986	1896	1698	1914	1812	1908	0.0076179	0.0058539	2010	0.0072637	1.4418	2.8686	0.40643
untreated-a	3674	3700	3719	1.6398	0.75367	2.3432	1.0473	1962	1836	2016	1884	1698	1920	1806	1914	0.0068872	0.0064834	2034	0.0064201	1.3158	2.609	0.47809
untreated-a	3674	3700	3720	1.3726	0.75367	1.8975	1.0473	1944	1836	1998	1884	1698	1920	1806	1914	0.0068872	0.0064834	2034	0.0063846	1.2509	2.5408	0.50178
untreated-a	3699	3716	3733	1.6365	0.88015	2.2295	1.3669	2058	1938	2106	1998	1806	2016	1914	2010	0.0068473	0.0063787	2130	0.0061156	1.3145	2.6615	0.47551
untreated-a	3699	3715	3739	1.7047	0.85106	2.4239	1.2064	2094	1962	2148	2010	1806	2040	1914	2034	0.0067462	0.0063787	2160	0.0059086	1.3769	2.727	0.50471
untreated-a	3700	3720	3741	2.0868	0.68632	2.5447	0.94873	2136	1944	2172	1998	1806	2040	1920	2034	0.0063846	0.0068872	2196	0.0057829	1.2435	3.1691	0.51117
untreated-a	3716	3733	3752	1.8916	0.81824	2.5502	1.1147	2208	2058	2262	2106	1914	2136	2016	2130	0.0061156	0.0068473	2286	0.0057558	1.3141	2.9925	0.48134
untreated-a	3715	3739	3761	1.7666	0.85235	2.3463	1.2119	2208	2094	2256	2148	1914	2166	2040	2160	0.0059086	0.0067462	2274	0.006238	1.4457	2.7154	0.49189
untreated-a	3739	3761	3781	1.963	0.88332	2.5455	1.1731	2334	2208	2376	2256	2040	2280	2166	2274	0.006238	0.0059086	2394	0.0066735	1.3797	2.9299	0.28946
untreated-a	3989	4005	4027	1.8372	0.85002	2.6774	1.2357	1356	1242	1410	1296	1098	1320	1212	1314	0.0071406	0.0069146	1422	0.0065162	1.5046	2.8725	0.52132
untreated-a	3989	4005	4028	1.5132	0.85002	1.8377	1.2357	1338	1242	1374	1296	1098	1320	1212	1314	0.0071406	0.0069146	1422	0.0067385	1.3213	2.5871	0.50037
untreated-a	4005	4027	4044	1.6399	0.91862	2.5997	1.3387	1458	1356	1518	1410	1212	1428	1320	1422	0.0065162	0.0071406	1536	0.0075424	1.3784	2.9237	0.46723
untreated-a	4005	4028	4045	1.5701	0.7566	2.2171	0.91887	1470	1338	1524	1374	1212	1428	1320	1422	0.0067385	0.0071406	1548	0.0064813	1.2487	2.6592	0.49404
untreated-a	4005	4028	4046	1.6385	0.7566	2.157	0.91887	1482	1338	1530	1374	1212	1428	1320	1422	0.0067385	0.0071406	1560	0.0063897	1.1185	2.7452	0.53259
untreated-a	4028	4046	4072	1.6977	0.81923	2.4183	1.0785	1614	1482	1674	1530	1320	1566	1428	1560	0.0063897	0.0067385	1698	0.0058726	1.2471	2.8063	0.55957
untreated-a	4046	4072	4104	1.5084	0.84886	2.2845	1.2091	1728	1614	1788	1674	1428	1704	1566	1698	0.0058726	0.0063897	1806	0.0070859	1.3105	2.7222	0.52103
untreated-a	4086	4113	4137	1.3131	0.65807	1.8955	0.95327	1944	1806	1998	1866	1644	1908	1776	1902	0.0061355	0.0060931	2022	0.0064497	1.0543	2.2892	0.4724
untreated-a	4381	4390	4411	1.6335	0.78445	2.3447	1.1096	1278	1158	1320	1194	1020	1224	1122	1218	0.0071782	0.0075289	1344	0.0074775	1.1914	2.8112	0.49375
untreated-a	4383	4398	4420	1.8342	0.78777	2.4204	1.0475	1332	1182	1374	1230	1032	1260	1140	1254	0.0068553	0.006721	1386	0.0069658	1.1797	2.6731	0.49452
untreated-a	4382	4403	4422	1.313	0.78525	2.0949	1.1076	1314	1200	1380	1254	1032	1284	1164	1278	0.0063648	0.005762	1404	0.0068548	1.2456	2.6065	0.57223
untreated-a	4382	4403	4423	1.5704	0.78525	2.1552	1.1076	1314	1200	1362	1254	1032	1284	1164	1278	0.0063648	0.005762	1386	0.007222	1.3836	2.7458	0.51453
untreated-a	4382	4402	4432	1.372	0.7237	1.8903	0.98133	1380	1206	1434	1266	1032	1326	1164	1320	0.0050874	0.005762	1470	0.0056231	1.1807	2.4817	0.62637
untreated-a	4382	4402	4433	1.5091	0.7237	1.6338	0.98133	1362	1206	1386	1266	1032	1326	1164	1320	0.0050874	0.005762	1464	0.0055569	1.2521	2.6774	0.57778
untreated-a	4391	4415	4438	1.5692	0.6233	2.4718	1.0748	1398	1266	1458	1344	1122	1374	1248	1368	0.0070377	0.0070251	1482	0.0073555	1.3764	2.9357	0.43051
untreated-a	4391	4415	4439	1.312	0.6233	1.9614	1.0748	1386	1266	1440	1344	1122	1374	1248	1368	0.0070377	0.0070251	1464	0.007517	1.1821	2.3515	0.53309
untreated-a	4403	4422	4446	1.3776	0.65649	2.1589	1.0474	1428	1314	1488	1380	1164	1410	1284	1404	0.0068548	0.0063648	1512	0.0072822	1.2483	2.6083	0.51711
untreated-a	4403	4422	4447	1.7054	0.65649	2.4735	1.0474	1452	1314	1500	1380	1164	1410	1284	1404	0.0068548	0.0063648	1518	0.0076262	1.3118	2.9168	0.42991
untreated-a	4415	4439	4457	1.5027	0.65598	2.4808	0.98069	1524	1386	1590	1440	1248	1470	1374	1464	0.007517	0.0070377	1602	0.0071953	1.0562	2.7281	0.46372
untreated-a	4402	4433	4459	1.5064	0.75457	1.8965	0.81692	1500	1362	1548	1386	1164	1470	1326	1464	0.0055569	0.0050874	1572	0.0058344	1.3135	2.3357	0.60253
untreated-a	4402	4432	4460	1.5105	0.68601	2.0248	0.94515	1512	1380	1554	1434	1164	1476	1326	1470	0.0056231	0.0050874	1584	0.0064271	1.3139	2.4838	0.55296
untreated-a	4402	4432	4461	1.2545	0.68601	1.8311	0.94515	1494	1380	1554	1434	1164	1476	1326	1470	0.0056231	0.0050874	1596	0.0066614	1.1135	2.4707	0.58272
untreated-a	4422	4446	4467	1.8312	0.6888	2.4097	1.0794	1566	1428	1614	1488	1284	1518	1410	1512	0.0072822	0.0068548	1638	0.0061691	1.3101	2.6762	0.43048
untreated-a	4433	4459	4476	1.3765	0.7532	2.0273	0.94824	1614	1500	1668	1548	1326	1578	1470	1572	0.0058344	0.0055569	1692	0.0071038	1.1797	2.4784	0.53323
untreated-a	4433	4459	4477	1.6412	0.7532	2.1519	0.94824	1626	1500	1668	1548	1326	1578	1470	1572	0.0058344	0.0055569	1692	0.0074534	1.1787	2.7295	0.48791
untreated-a	4432	4460	4479	1.5661	0.75527	2.2224	1.0124	1632	1512	1680	1554	1326	1590	1476	1584	0.0064271	0.0056231	1710	0.0074377	1.2483	2.9817	0.49401
untreated-a	4432	4461	4481	1.6435	0.62725	2.2856	0.91553	1644	1494	1692	1554	1326	1602	1476	1596	0.0066614	0.0056231	1710	0.0071649	1.1803	2.6068	0.53933
untreated-a	4459	4476	4494	1.3763	0.68827	2.0946	1.0137	1734	1614	1788	1668	1470	1698	1578	1692	0.0071038	0.0058344	1818	0.006862	1.2484	2.7317	0.5291
untreated-a	4459	4476	4495	1.5678	0.68827	2.4801	1.0137	1740	1614	1794	1668	1470	1698	1578	1692	0.0071038	0.0058344	1812	0.0077937	1.1817	2.7827	0.42353
untreated-a	4461	4481	4502	1.7702	0.82173	2.3465	1.1428	1776	1644	1818	1692	1476	1716	1602	1710	0.0071649	0.0066614	1854	0.00617	1.5009	2.9935	0.49358
untreated-a	4461	4481	4503	1.7582	0.82173	2.3478	1.1428	1758	1644	1806	1692	1476	1716	1602	1710	0.0071649	0.0066614	1860	0.0064148	1.1873	3.3081	0.50843
untreated-a	4481	4502	4522	1.6367	0.88511	2.6607	1.1732	1878	1776	1932	1818	1602	1860	1716	1854	0.00617	0.0071649	1956	0.0078061	1.4424	3.0633	0.46673
untreated-a	4481	4502	4523	1.6389	0.88511	2.3462	1.1732	1872	1776	1926	1818	1602	1860	1716	1854	0.00617	0.0071649	1962	0.0072434	1.4454	3.0544	0.52736
untreated-a	4502	4523	4543	1.7018	0.81944	2.286	1.1731	1998	1872	2040	1926	1716	1968	1860	1962	0.0072434	0.00617	2064	0.0071151	1.3758	2.7951	0.46643
untreated-a	4544	4565	4596	1.57	0.78561	2.0887	1.015	2298	2166	2352	2208	1980	2268	2112	2262	0.0059422	0.0062351	2400	0.0051773	1.3738	2.686	0.46622
untreated-a	4544	4565	4597	1.5084	0.78561	2.0243	1.015	2304	2166	2358	2208	1980	2268	2112	2262	0.0059422	0.0062351	2382	0.0049023	1.3207	2.3501	0.54686
untreated-a	4548	4573	4598	1.7026	0.88155	2.0223	1.1769	2316	2196	2346	2244	1992	2274	2148	2268	0.0060828	0.0058892	2388	0.0068667	1.314	2.8044	0.43057
untreated-a	5090	5100	5106	2.0231	1.0452	2.8064	1.4957	1194	1080	1242	1134	930	1140	1044	1134	0.0057816	0.0064798	1248	0.0069553	1.3159	2.9815	0.47486
untreated-a	5091	5103	5107	1.6368	0.75211	2.4786	1.3377	1176	1068	1218	1128	948	1140	1068	1134	0.0094014	0.0079478	1230	0.0085604	1.1833	2.5861	0.36456
untreated-a	5100	5106	5116	1.9702	1.0115	2.6606	1.4032	1314	1194	1362	1242	1044	1254	1140	1248	0.0069553	0.0057816	1380	0.0059173	1.3078	2.9957	0.48474
untreated-a	5106	5116	5131	1.8983	0.98509	2.733	1.3303	1422	1314	1482	1362	1140	1386	1254	1380	0.0059173	0.0069553	1500	0.0060426	1.5732	3.0549	0.5005
untreated-a	5106	5116	5132	1.7657	0.98509	2.5521	1.3303	1422	1314	1476	1362	1140	1386	1254	1380	0.0059173	0.0069553	1494	0.0063965	1.5127	2.8794	0.45912
untreated-a	5116	5132	5141	1.9679	0.88285	2.6075	1.276	1536	1422	1584	1476	1254	1500	1386	1494	0.0063965	0.0059173	1614	0.0061244	1.6996	3.2415	0.48468
untreated-a	5116	5132	5142	1.5109	0.88285	2.1583	1.276	1524	1422	1578	1476	1254	1500	1386	1494	0.0063965	0.0059173	1620	0.0068732	1.2547	2.9181	0.45339
untreated-a	5132	5142	5153	1.896	0.75547	2.3448	1.0792	1668	1524	1692	1578	1386	1626	1500	1620	0.0068732	0.0063965	1728	0.0072933	1.4436	2.9282	0.39435
untreated-a	5350	5356	5362	1.6368	0.75211	2.4786	1.3377	1176	1068	1218	1128	948	1140	1068	1134	0.0094014	0.0079478	1230	0.0085604	1.1833	2.5861	0.36456
untreated-a	5355	5365	5378	1.9653	0.98008	2.8011	1.3006	1308	1188	1362	1236	1020	1266	1140	1260	0.0063341	0.0062956	1380	0.0063975	1.6376	3.2378	0.45191
untreated-a	5355	5365	5379	1.8331	0.98008	2.558	1.3006	1314	1188	1362	1236	1020	1266	1140	1260	0.0063341	0.0062956	1380	0.0067839	1.4411	3.0575	0.47268
untreated-a	5365	5379	5394	1.9636	0.91654	2.9858	1.279	1428	1314	1482	1362	1140	1386	1266	1380	0.0067839	0.0063341	1488	0.0070129	1.5711	3.1781	0.43415
untreated-a	5379	5394	5402	1.9012	0.98182	2.6718	1.4929	1530	1428	1584	1482	1266	1494	1386	1488	0.0070129	0.0067839	1596	0.0065456	1.4393	2.9808	0.465
untreated-a	5394	5402	5413	1.8359	0.9506	2.6025	1.3359	1650	1530	1698	1584	1386	1602	1494	1596	0.0065456	0.0070129	1734	0.0067814	1.2473	3.3666	0.41853
untreated-a	5432	5447	5460	1.5689	0.81853	2.3472	1.2961	2004	1884	2052	1944	1758	1974	1872	1968	0.0066806	0.0066734	2082	0.007846	1.3123	2.9929	0.52432
untreated-a	5433	5451	5463	1.8904	0.97895	2.5939	1.3444	2046	1938	2094	1986	1758	2016	1896	2010	0.0068103	0.006373	2124	0.0065115	1.573	3.1122	0.47846
untreated-a	5451	5463	5475	1.8899	0.94521	2.3528	1.297	2178	2046	2208	2094	1896	2130	2016	2124	0.0065115	0.0068103	2232	0.005917	1.5683	2.669	0.41444
untreated-a	5451	5463	5476	1.7032	0.94521	2.3498	1.297	2148	2046	2202	2094	1896	2130	2016	2124	0.0065115	0.0068103	2232	0.0061209	1.5084	2.9122	0.47412
untreated-a	5463	5475	5485	1.8916	0.94493	2.0885	1.1764	2316	2178	2340	2208	2016	2238	2130	2232	0.005917	0.0065115	2400	0.0047639	1.4457	2.8038	0.42821
untreated-a	5463	5475	5489	1.5047	0.94493	2.1532	1.1764	2286	2178	2340	2208	2016	2238	2130	2232	0.005917	0.0065115	2376	0.0062908	1.1811	2.7298	0.48204
untreated-a	5463	5476	5490	1.8949	0.85159	2.6777	1.1749	2286	2148	2340	2202	2016	2238	2130	2232	0.0061209	0.0065115	2358	0.006118	1.4439	3.1135	0.42563
untreated-a	5775	5787	5803	1.7048	0.8163	2.9339	1.1759	2070	1968	2154	2016	1872	2040	1950	2034	0.0073347	0.0076464	2160	0.0066241	1.3134	2.9892	0.4123
untreated-a	5775	5787	5804	1.4458	0.8163	2.6126	1.1759	2070	1968	2154	2016	1872	2040	1950	2034	0.0073347	0.0076464	2154	0.0063623	1.3849	2.6126	0.40516
untreated-a	5787	5804	5818	1.5691	0.72289	2.2213	1.3063	2208	2070	2262	2154	1950	2160	2040	2154	0.0063623	0.0073347	2292	0.0053065	1.1784	2.6097	0.45031
untreated-a	6724	6742	6761	1.6382	0.88565	2.5421	1.1779	1314	1206	1374	1254	1062	1290	1182	1284	0.007026	0.0069673	1392	0.0074063	1.3099	2.8628	0.40383
untreated-a	7295	7320	7339	1.2477	0.75126	2.1532	1.144	918	834	1002	894	666	912	786	906	0.0066845	0.0072729	1020	0.0069229	1.1232	2.4832	0.43649
untreated-a	7295	7320	7340	1.7669	0.75126	2.4194	1.144	966	834	1014	894	666	912	786	906	0.0066845	0.0072729	1026	0.0064319	1.3085	2.6705	0.43502
untreated-a	7295	7319	7341	1.5063	0.68801	2.2254	1.0767	978	834	1038	894	666	918	786	912	0.0063701	0.0072729	1056	0.0058372	1.2542	2.5921	0.49227
untreated-a	7320	7339	7358	1.575	0.62384	2.3394	1.0766	1074	918	1128	1002	786	1026	912	1020	0.0069229	0.0066845	1152	0.0068454	1.1184	2.7946	0.43575
untreated-a	7332	7356	7374	1.5751	0.91567	2.2116	1.0731	1158	1080	1212	1104	888	1140	1026	1134	0.0074187	0.0070987	1230	0.0069293	1.3756	2.5431	0.42866
untreated-a	7356	7374	7390	1.7052	0.78755	2.6158	1.1058	1278	1158	1332	1212	1026	1236	1140	1230	0.0069293	0.0074187	1332	0.0072568	1.3855	2.6158	0.44501
untreated-a	7374	7390	7413	1.3086	0.85259	2.2836	1.3079	1374	1278	1452	1332	1140	1338	1236	1332	0.0072568	0.0069293	1476	0.0061093	1.2473	2.7437	0.46478
untreated-a	7441	7453	7466	1.7668	0.66503	2.9223	0.78507	1818	1650	1890	1674	1548	1770	1656	1764	0.0067954	0.0068569	1896	0.0067151	1.3754	3	0.43077
untreated-a	7441	7453	7467	1.8337	0.66503	2.4211	0.78507	1806	1650	1860	1674	1548	1770	1656	1764	0.0067954	0.0068569	1872	0.006067	1.443	2.7455	0.45431
untreated-a	7463	7484	7502	2.0974	0.94919	3.0673	1.2378	2064	1932	2118	1974	1740	1998	1860	1992	0.0063016	0.006078	2130	0.006865	1.308	3.3672	0.46359
untreated-a	7664	7677	7700	1.8954	0.81825	2.286	1.3328	942	822	972	876	678	912	786	906	0.0081631	0.0068946	1026	0.0064761	1.6398	3.2005	0.39871
untreated-a	7718	7729	7741	1.8329	0.85221	2.4764	1.4009	1308	1188	1356	1260	1032	1266	1140	1260	0.007009	0.0067764	1380	0.0069341	1.3813	3.1458	0.44802
untreated-a	7719	7732	7742	1.8267	0.85487	2.6541	1.143	1314	1194	1368	1242	1032	1266	1164	1260	0.006513	0.0067408	1380	0.0065071	1.4409	2.8059	0.38669
untreated-a	7718	7730	7747	1.8912	0.81906	2.5938	1.171	1332	1188	1380	1242	1032	1284	1140	1278	0.0061137	0.0067764	1410	0.0062704	1.3747	3.182	0.43137
untreated-a	7718	7730	7748	1.5751	0.81906	2.4065	1.171	1314	1188	1374	1242	1032	1284	1140	1278	0.0061137	0.0067764	1398	0.0069947	1.3146	2.8593	0.45212
untreated-a	7729	7741	7758	1.963	0.91645	2.6733	1.2382	1428	1308	1476	1356	1140	1386	1266	1380	0.0069341	0.007009	1476	0.0064623	1.5054	2.6733	0.50251
untreated-a	7732	7742	7760	2.0319	0.91334	2.7384	1.3271	1452	1314	1494	1368	1164	1386	1266	1380	0.0065071	0.006513	1506	0.0054241	1.5752	2.8677	0.33294
untreated-a	7730	7748	7765	1.7719	0.78753	2.3544	1.2033	1446	1314	1494	1374	1140	1404	1284	1398	0.0069947	0.0061137	1518	0.0063699	1.3824	2.7967	0.42206
untreated-a	7730	7748	7766	1.8903	0.78753	2.6053	1.2033	1446	1314	1488	1374	1140	1404	1284	1398	0.0069947	0.0061137	1512	0.0071948	1.5708	3.1884	0.40064
untreated-a	7730	7747	7767	1.8316	0.9456	2.2834	1.2969	1440	1332	1482	1380	1140	1416	1284	1410	0.0062704	0.0061137	1518	0.0053729	1.6379	2.807	0.46653
untreated-a	7730	7747	7768	1.8982	0.9456	2.5374	1.2969	1464	1332	1512	1380	1140	1416	1284	1410	0.0062704	0.0061137	1542	0.0060875	1.4421	3.0618	0.4289
untreated-a	7748	7766	7780	1.6321	0.94515	2.4164	1.3027	1536	1446	1590	1488	1284	1518	1404	1512	0.0071948	0.0069947	1620	0.0073176	1.5047	2.9984	0.42168
untreated-a	7748	7765	7783	1.8301	0.88595	2.4835	1.1772	1572	1446	1620	1494	1284	1524	1404	1518	0.0063699	0.0069947	1638	0.0070485	1.4447	2.9289	0.49076
untreated-a	7747	7767	7784	1.8302	0.91581	2.414	1.1417	1566	1440	1608	1482	1284	1524	1416	1518	0.0053729	0.0062704	1638	0.0071281	1.4488	3.1127	0.46629
untreated-a	7747	7767	7785	1.83	0.91581	2.3477	1.1417	1572	1440	1620	1482	1284	1524	1416	1518	0.0053729	0.0062704	1662	0.0059067	1.3823	3.1277	0.47629
untreated-a	7747	7768	7788	1.7025	0.94911	2.029	1.2687	1572	1464	1602	1512	1284	1548	1416	1542	0.0060875	0.0062704	1668	0.0057937	1.4452	2.86	0.48572
untreated-a	7767	7785	7805	1.706	0.915	2.0254	1.1739	1674	1572	1704	1620	1416	1668	1524	1662	0.0059067	0.0053729	1758	0.0071089	1.6386	2.9697	0.43245
untreated-a	801	822	837	2.0894	0.94745	2.8505	1.3715	1926	1812	1974	1860	1650	1878	1770	1872	0.0070957	0.0071673	1992	0.0060021	1.7053	3.2551	0.53063
untreated-a	801	823	838	1.7685	0.91674	2.5925	1.2749	1926	1812	1980	1860	1650	1890	1770	1884	0.0067782	0.0071673	1992	0.0067541	1.5063	2.9395	0.53768
untreated-a	925	932	939	2.0914	0.98005	3.0598	1.0821	936	816	984	840	672	882	780	876	0.0060262	0.0064955	996	0.007379	1.5062	3.3973	0.56273
untreated-a	925	932	940	1.7086	0.98005	2.2829	1.0821	924	816	972	840	672	882	780	876	0.0060262	0.0064955	996	0.0066742	1.3754	2.8089	0.57169
untreated-a	926	935	943	1.6398	0.91613	2.0942	1.2124	936	816	984	870	672	906	798	900	0.0060113	0.006072	1032	0.0057438	1.4444	2.9074	0.53042
untreated-a	926	935	944	1.6347	0.91613	2.3489	1.2124	918	816	972	870	672	906	798	900	0.0060113	0.006072	1002	0.0067631	1.574	2.933	0.58113
untreated-a	926	936	945	1.9604	0.97908	2.6863	1.2739	948	822	1002	870	672	924	798	918	0.0054541	0.006072	1026	0.0066603	1.634	3.2373	0.56815
untreated-a	932	940	951	1.6961	0.85432	2.2251	1.1414	1044	924	1080	972	780	1002	882	996	0.0066742	0.0060262	1104	0.0064149	1.5084	2.7206	0.55763
untreated-a	935	944	953	1.5058	0.81737	2.0923	1.1744	1032	918	1080	972	798	1008	906	1002	0.0067631	0.0060113	1116	0.0064593	1.3732	2.7473	0.57223
untreated-a	955	967	973	1.9567	1.1409	2.9893	1.4964	1260	1176	1320	1224	1020	1248	1140	1242	0.0061464	0.0067462	1338	0.0070789	1.7649	3.4247	0.51867
untreated-a	967	973	985	1.6578	0.97833	2.7996	1.4946	1332	1260	1404	1320	1140	1344	1248	1338	0.0070789	0.0061464	1422	0.0078058	1.6987	3.189	0.48695
untreated-a	973	985	993	1.9639	0.82892	3.0033	1.3998	1458	1332	1512	1404	1248	1428	1344	1422	0.0078058	0.0070789	1524	0.0074845	1.5707	3.2399	0.48744
untreated-a	985	993	1005	2.0899	0.98195	2.9902	1.5017	1560	1458	1608	1512	1344	1530	1428	1524	0.0074845	0.0078058	1626	0.0077433	1.6382	3.507	0.49388
untreated-a	993	1005	1017	1.8379	1.0449	2.9311	1.4951	1638	1560	1704	1608	1428	1632	1530	1626	0.0077433	0.0074845	1716	0.0079038	1.6335	3.307	0.42521
untreated-a	1005	1017	1027	1.8354	0.91893	2.9853	1.4655	1734	1638	1794	1704	1530	1722	1632	1716	0.0079038	0.0077433	1800	0.0084618	1.5726	3.1209	0.48793
untreated-a	1017	1027	1031	1.9569	0.91772	2.6767	1.4927	1824	1734	1878	1794	1632	1806	1722	1800	0.0084618	0.0079038	1896	0.0070556	1.576	3.1955	0.50325
untreated-a	1027	1031	1051	1.9617	0.97847	2.9273	1.3384	1926	1824	1986	1878	1722	1902	1806	1896	0.0070556	0.0084618	1992	0.0067865	1.6399	3.1186	0.49692
untreated-a	1031	1051	1065	1.8327	0.98087	2.8623	1.4637	2028	1926	2088	1986	1806	1998	1902	1992	0.0067865	0.0070556	2100	0.0072737	1.5068	3.182	0.48305
untreated-a	1488	1493	1500	2.0841	0.98212	2.8697	1.2997	1626	1524	1686	1572	1380	1608	1500	1602	0.0066699	0.0064875	1704	0.0061859	1.7659	3.2563	0.52481
untreated-a	1493	1500	1505	2.0967	1.042	2.9935	1.4348	1740	1626	1800	1686	1500	1710	1608	1704	0.0061859	0.0066699	1812	0.0061142	1.7631	3.2515	0.5376
untreated-a	1493	1500	1506	1.5692	1.042	2.2042	1.4348	1722	1626	1776	1686	1500	1710	1608	1704	0.0061859	0.0066699	1812	0.00677	1.5082	2.8694	0.55382
untreated-a	1500	1505	1513	2.1537	1.0484	2.8073	1.4968	1866	1740	1920	1800	1608	1818	1710	1812	0.0061142	0.0061859	1944	0.0055811	1.6398	3.3768	0.53264
untreated-a	1500	1506	1514	1.9633	0.78458	2.6093	1.1021	1872	1722	1920	1776	1608	1818	1710	1812	0.00677	0.0061859	1950	0.0059912	1.5104	3.1893	0.56491
untreated-a	1506	1514	1531	2.2224	0.98166	3.0033	1.3046	2022	1872	2064	1920	1710	1956	1818	1950	0.0059912	0.00677	2100	0.0061104	1.5762	3.7678	0.55934
untreated-a	1506	1514	1532	2.021	0.98166	2.6172	1.3046	2004	1872	2046	1920	1710	1956	1818	1950	0.0059912	0.00677	2070	0.0067917	1.5045	3.3074	0.51033
untreated-a	2349	2363	2374	1.5676	0.8508	2.5509	1.2142	822	738	882	786	630	810	726	804	0.0078505	0.0073334	894	0.0084631	1.4371	2.8778	0.5322
untreated-a	2349	2363	2375	1.6366	0.8508	2.3549	1.2142	834	738	888	786	630	810	726	804	0.0078505	0.0073334	912	0.007132	1.3733	2.9264	0.53594
untreated-a	2349	2364	2380	1.9607	0.98125	2.608	1.2742	858	744	900	786	630	822	726	816	0.006978	0.0073334	924	0.0067211	1.6413	3.1319	0.52572
untreated-a	2350	2371	2382	1.767	0.91554	2.4736	1.2754	864	756	912	798	630	828	738	822	0.0069944	0.0072341	942	0.0064445	1.3725	2.9126	0.50476
untreated-a	2350	2370	2384	1.6443	0.78706	2.3438	1.046	870	750	936	792	630	840	738	834	0.0069941	0.0072341	960	0.0060494	1.3777	2.7448	0.58334
untreated-a	2364	2380	2397	1.5694	0.98034	2.0903	1.304	948	858	1002	900	726	930	822	924	0.0067211	0.006978	1050	0.0061817	1.3732	3.0096	0.52315
untreated-a	2370	2384	2402	1.8337	0.82217	2.3589	1.1719	1014	870	1056	936	738	966	840	960	0.0060494	0.0069941	1092	0.0060264	1.4457	3.0523	0.53397
untreated-a	2370	2384	2403	2.1535	0.82217	2.8599	1.1719	1044	870	1086	936	738	966	840	960	0.0060494	0.0069941	1116	0.0066018	1.3852	3.6226	0.48072
untreated-a	2384	2402	2417	1.6304	0.91686	2.2898	1.1795	1122	1014	1182	1056	840	1098	966	1092	0.0060264	0.0060494	1206	0.0064135	1.4389	2.8577	0.50282
untreated-a	2394	2407	2424	1.6374	0.81631	2.3634	1.268	1146	1038	1200	1098	918	1128	1014	1122	0.0070246	0.0069896	1230	0.0072174	1.4405	3.0588	0.51905
untreated-a	2394	2407	2425	1.7666	0.81631	2.3531	1.268	1146	1038	1188	1098	918	1128	1014	1122	0.0070246	0.0069896	1218	0.0069187	1.5728	2.9277	0.5365
untreated-a	2395	2411	2430	2.0244	0.98148	2.6046	1.3331	1218	1104	1260	1152	918	1182	1044	1176	0.0064661	0.0066156	1296	0.0064312	1.5707	3.266	0.56106
untreated-a	2407	2425	2436	1.9558	0.88331	2.7467	1.1765	1260	1146	1314	1188	1014	1224	1128	1218	0.0069187	0.0070246	1338	0.0065332	1.5707	3.3208	0.52532
untreated-a	2411	2430	2452	1.8369	1.0122	2.4769	1.3023	1326	1218	1374	1260	1044	1302	1182	1296	0.0064312	0.0064661	1398	0.0065307	1.6305	2.9494	0.56921
untreated-a	2430	2452	2464	1.7039	0.91843	2.4081	1.2384	1422	1326	1470	1374	1182	1404	1302	1398	0.0065307	0.0064312	1488	0.0080094	1.4426	2.7874	0.56632
untreated-a	2626	2640	2665	1.6327	0.75139	2.3528	1.1777	864	732	918	792	606	834	702	828	0.006557	0.0080852	948	0.0068991	1.4384	3.0661	0.5448
untreated-a	2626	2640	2666	1.8306	0.75139	2.4219	1.1777	870	732	918	792	606	834	702	828	0.006557	0.0080852	954	0.0062232	1.4418	3.1239	0.54477
untreated-a	2625	2644	2669	1.5737	0.81886	2.1525	1.1451	864	750	918	804	606	846	714	840	0.0065409	0.0073199	948	0.0068635	1.3732	2.8106	0.56936
untreated-a	2643	2662	2679	1.5709	0.81697	2.157	1.2787	966	852	1020	912	714	942	822	936	0.0068886	0.0070229	1062	0.0062736	1.5046	2.9296	0.51383
untreated-a	2640	2665	2684	2.1548	0.81636	2.6834	1.1764	1008	864	1050	918	702	954	834	948	0.0068991	0.006557	1080	0.0063645	1.5042	3.3911	0.52162
untreated-a	2913	2918	2924	1.77	0.85026	2.2925	1.1784	840	720	888	768	612	810	714	804	0.0070146	0.007789	912	0.0066564	1.5071	2.9318	0.53769
untreated-a	2913	2918	2925	1.7028	0.85026	2.4172	1.1784	834	720	888	768	612	810	714	804	0.0070146	0.007789	906	0.006759	1.4375	2.8126	0.54526
untreated-a	2912	2917	2926	1.8232	0.91264	2.3507	1.3015	870	744	918	798	612	822	702	816	0.0061256	0.0064812	948	0.0064147	1.509	3.1377	0.54371
untreated-a	2918	2925	2930	1.8348	0.8514	2.673	1.2086	960	834	1008	888	714	912	810	906	0.006759	0.0070146	1026	0.0068136	1.378	2.7819	0.49291
untreated-a	2918	2924	2932	1.5735	0.88501	2.1644	1.1462	948	840	996	888	714	918	810	912	0.0066564	0.0070146	1020	0.0063784	1.3774	2.5394	0.5234
untreated-a	2918	2924	2933	1.5725	0.88501	2.4182	1.1462	936	840	990	888	714	918	810	912	0.0066564	0.0070146	1032	0.0071027	1.5137	3.2447	0.55763
untreated-a	2917	2926	2935	1.7737	0.9116	2.671	1.1753	996	870	1050	918	702	954	822	948	0.0064147	0.0061256	1074	0.0071453	1.3781	3.1945	0.5048
untreated-a	2924	2932	2938	1.4426	0.78675	2.0982	1.0822	1062	948	1122	996	810	1026	918	1020	0.0063784	0.0066564	1152	0.0062193	1.1879	2.5468	0.53527
untreated-a	2924	2933	2942	1.6423	0.78627	2.4808	1.2091	1038	936	1098	990	810	1038	918	1032	0.0071027	0.0066564	1128	0.0074078	1.6423	3.1259	0.53536
untreated-a	2933	2942	2952	1.7015	0.82113	2.5437	1.2404	1176	1038	1230	1098	918	1134	1038	1128	0.0074078	0.0071027	1254	0.0060696	1.5741	3.0166	0.59094
untreated-a	2932	2938	2954	1.8996	0.72132	2.6066	1.0491	1212	1062	1260	1122	918	1158	1026	1152	0.0062193	0.0063784	1284	0.0072953	1.3065	3.377	0.54293
untreated-a	2932	2938	2955	1.3731	0.72132	1.9026	1.0491	1194	1062	1248	1122	918	1158	1026	1152	0.0062193	0.0063784	1278	0.0064619	1.1836	2.4655	0.56584
untreated-a	2942	2952	2956	1.7065	0.85075	2.4222	1.2718	1284	1176	1332	1230	1038	1260	1134	1254	0.0060696	0.0074078	1368	0.0072193	1.4406	2.7257	0.4672
untreated-a	2938	2955	2962	1.3826	0.68656	1.9603	0.95128	1320	1194	1380	1248	1026	1284	1158	1278	0.0064619	0.0062193	1416	0.0061425	1.1882	2.6054	0.56449
untreated-a	2938	2955	2963	1.5029	0.68656	2.1525	0.95128	1326	1194	1380	1248	1026	1284	1158	1278	0.0064619	0.0062193	1398	0.0065063	1.2492	2.5166	0.5617
untreated-a	2938	2954	2965	1.8945	0.94979	2.5364	1.3033	1326	1212	1368	1260	1026	1290	1158	1284	0.0072953	0.0062193	1410	0.0059128	1.6358	3.1382	0.5644
untreated-a	2955	2963	2972	1.6401	0.75147	2.3461	1.0762	1452	1326	1506	1380	1158	1404	1284	1398	0.0065063	0.0064619	1518	0.0065992	1.3155	2.5986	0.57297
untreated-a	2955	2963	2973	1.579	0.75147	2.3458	1.0762	1464	1326	1518	1380	1158	1404	1284	1398	0.0065063	0.0064619	1542	0.0065354	1.1164	2.8036	0.55687
untreated-a	2955	2962	2977	1.5009	0.69129	2.3407	0.98017	1476	1320	1530	1380	1158	1422	1284	1416	0.0061425	0.0064619	1566	0.0061655	1.2465	2.862	0.56741
untreated-a	2963	2972	2984	1.8315	0.82003	2.4212	1.173	1584	1452	1626	1506	1284	1524	1404	1518	0.0065992	0.0065063	1650	0.0071241	1.316	3.1219	0.5448
untreated-a	2963	2972	2985	1.5068	0.82003	2.1435	1.173	1566	1452	1620	1506	1284	1524	1404	1518	0.0065992	0.0065063	1644	0.0062708	1.2503	2.6069	0.52268
untreated-a	2963	2973	2986	1.5705	0.78951	2.4076	1.1729	1572	1464	1626	1518	1284	1548	1404	1542	0.0065354	0.0065063	1650	0.0066351	1.4413	2.7372	0.55842
untreated-a	2963	2973	2987	1.6369	0.78951	2.2205	1.1729	1584	1464	1638	1518	1284	1548	1404	1542	0.0065354	0.0065063	1650	0.0057897	1.3764	2.414	0.5947
untreated-a	2972	2985	2992	1.4416	0.75341	2.35	1.0717	1686	1566	1752	1620	1404	1650	1524	1644	0.0062708	0.0065992	1782	0.0071611	1.1781	2.8679	0.55445
untreated-a	2973	2987	2998	1.7633	0.81845	2.3529	1.1103	1710	1584	1752	1638	1404	1656	1548	1650	0.0057897	0.0065354	1776	0.0071455	1.2466	2.912	0.55452
untreated-a	2973	2987	2999	1.771	0.81845	2.2837	1.1103	1710	1584	1752	1638	1404	1656	1548	1650	0.0057897	0.0065354	1776	0.0066773	1.1817	2.7438	0.5814
untreated-a	2987	2998	3003	1.9593	0.88166	2.7326	1.1765	1818	1710	1872	1752	1548	1782	1656	1776	0.0071455	0.0057897	1896	0.0067625	1.4431	3.2456	0.53253
untreated-a	2998	3003	3010	1.9002	0.97967	2.6074	1.3663	1932	1818	1980	1872	1656	1902	1782	1896	0.0067625	0.0071455	2010	0.0071147	1.5009	3.3062	0.50887
untreated-a	3094	3101	3111	1.8875	0.84853	2.4201	1.2157	1152	1032	1200	1080	882	1116	996	1110	0.0071189	0.0068635	1230	0.0057352	1.511	2.9341	0.54414
untreated-a	3094	3101	3112	1.5732	0.84853	2.2909	1.2157	1140	1032	1200	1080	882	1116	996	1110	0.0071189	0.0068635	1236	0.0064602	1.4473	3.06	0.59169
untreated-a	3094	3102	3116	2.086	0.91463	2.9987	1.2673	1158	1026	1206	1080	882	1128	996	1122	0.0063349	0.0068635	1218	0.0070852	1.7628	3.2486	0.47605
untreated-a	3093	3104	3117	1.6988	0.71904	2.4742	1.0106	1158	1020	1212	1074	882	1134	1002	1128	0.0058977	0.0067288	1242	0.006467	1.4459	2.9182	0.49829
untreated-a	3101	3112	3123	1.6996	0.78658	2.4101	1.1455	1266	1140	1314	1200	996	1242	1116	1236	0.0064602	0.0071189	1344	0.0068493	1.5082	3.0032	0.50521
untreated-a	3101	3112	3124	1.6978	0.78658	2.599	1.1455	1260	1140	1314	1200	996	1242	1116	1236	0.0064602	0.0071189	1332	0.0062193	1.5116	2.4257	0.47939
untreated-a	3316	3344	3363	1.7025	0.84839	2.467	1.239	1200	1062	1266	1122	894	1164	1026	1158	0.0057103	0.0051509	1290	0.0059927	1.4419	3.0622	0.48395
untreated-a	3537	3540	3549	1.9623	0.81844	2.615	1.3665	900	744	960	828	648	852	744	846	0.0065235	0.0076822	978	0.0050873	1.5713	2.9493	0.55728
untreated-a	3540	3549	3560	1.7039	0.98113	2.5963	1.3075	1014	900	1080	960	744	984	852	978	0.0050873	0.0065235	1092	0.0065186	1.4383	2.7932	0.50694
untreated-a	3566	3575	3584	2.0882	1.0407	2.6034	1.274	1398	1278	1440	1326	1098	1362	1218	1356	0.0053963	0.0060514	1482	0.0056359	1.7649	3.3733	0.50616
untreated-a	3575	3584	3593	1.701	1.0441	2.6141	1.3017	1494	1398	1566	1440	1218	1488	1362	1482	0.0056359	0.0053963	1578	0.0063966	1.6375	2.8726	0.62363
untreated-a	3584	3593	3594	1.7674	0.85052	3.0453	1.307	1614	1494	1698	1566	1362	1584	1488	1578	0.0063966	0.0056359	1698	0.00668	1.4469	3.0453	0.47811
untreated-a	3591	3600	3605	1.9616	0.85145	2.7451	1.2446	1776	1626	1836	1680	1482	1710	1620	1704	0.0068184	0.0058207	1866	0.0057984	1.3801	3.3929	0.49338
untreated-a	3591	3601	3611	2.0288	0.91691	2.7433	1.2052	1770	1626	1824	1680	1482	1728	1620	1722	0.0057751	0.0058207	1842	0.0054399	1.5789	3.0496	0.50683
untreated-a	3924	3933	3956	1.7737	0.88399	2.2877	1.1473	1020	906	1068	948	762	1008	870	1002	0.0062808	0.0062838	1110	0.0059595	1.6377	3.0011	0.58126
untreated-a	3924	3933	3957	1.7011	0.88399	2.7942	1.1473	1032	906	1110	948	762	1008	870	1002	0.0062808	0.0062838	1128	0.0065029	1.5036	3.2546	0.5802
untreated-a	3933	3956	3961	1.6347	0.88684	2.4062	1.1438	1134	1020	1194	1068	870	1116	1008	1110	0.0059595	0.0062808	1218	0.006436	1.5183	2.8738	0.56134
untreated-a	3933	3956	3962	1.6326	0.88684	2.3465	1.1438	1140	1020	1194	1068	870	1116	1008	1110	0.0059595	0.0062808	1218	0.0064564	1.5105	2.8057	0.58987
untreated-a	3933	3957	3965	1.8936	0.85054	2.7923	1.3971	1164	1032	1224	1110	870	1134	1008	1128	0.0065029	0.0062808	1242	0.0059515	1.6393	3.0583	0.5174
untreated-a	3956	3962	3976	1.4384	0.81629	2.2252	1.1733	1242	1140	1302	1194	1008	1224	1116	1218	0.0064564	0.0059595	1332	0.0068752	1.3759	2.7894	0.56641
untreated-a	3956	3962	3977	1.7023	0.81629	2.3485	1.1733	1266	1140	1320	1194	1008	1224	1116	1218	0.0064564	0.0059595	1350	0.006059	1.4454	2.8774	0.63544
untreated-a	3957	3965	3979	1.5737	0.9468	2.4114	1.3961	1260	1164	1320	1224	1008	1248	1134	1242	0.0059515	0.0065029	1350	0.0066465	1.5759	2.7858	0.45045
untreated-a	3962	3976	3981	1.8299	0.71921	2.4206	1.1126	1362	1242	1410	1302	1116	1338	1224	1332	0.0068752	0.0064564	1428	0.0069513	1.3731	2.725	0.56319
untreated-a	3962	3976	3982	1.4364	0.71921	2.0891	1.1126	1362	1242	1416	1302	1116	1338	1224	1332	0.0068752	0.0064564	1452	0.0066591	1.2461	2.6748	0.54634
untreated-a	3962	3977	3985	1.435	0.85117	2.1398	1.1743	1374	1266	1428	1320	1116	1356	1224	1350	0.006059	0.0064564	1476	0.006403	1.4432	2.9272	0.61022
untreated-a	3976	3982	3997	1.5755	0.71818	2.4214	1.0446	1494	1362	1554	1416	1224	1458	1338	1452	0.0066591	0.0068752	1566	0.0070985	1.179	2.6179	0.50122
untreated-a	3976	3982	3998	1.5689	0.71818	2.2281	1.0446	1494	1362	1542	1416	1224	1458	1338	1452	0.0066591	0.0068752	1578	0.0066384	1.3142	2.8645	0.60319
untreated-a	3977	3985	3999	1.5714	0.71751	2.0918	1.0699	1506	1374	1548	1428	1224	1482	1356	1476	0.006403	0.006059	1578	0.0066358	1.3794	2.6002	0.588
untreated-a	3977	3985	4000	1.702	0.71751	2.29	1.0699	1506	1374	1548	1428	1224	1482	1356	1476	0.006403	0.006059	1578	0.0077763	1.5062	3.0063	0.51216
untreated-a	3985	3999	4013	1.443	0.7857	2.0245	1.0459	1602	1506	1650	1548	1356	1584	1482	1578	0.0066358	0.006403	1686	0.0078849	1.1851	2.6683	0.5419
untreated-a	3999	4013	4026	1.6384	0.72151	2.5418	1.0123	1728	1602	1788	1650	1482	1692	1584	1686	0.0078849	0.0066358	1812	0.0074787	1.314	3.2474	0.5328
untreated-a	4135	4153	4168	1.9626	0.85257	2.6737	1.3996	876	744	930	816	612	846	714	840	0.0069007	0.0067257	960	0.0063589	1.5652	3.3142	0.50386
untreated-a	4135	4153	4169	1.764	0.85257	2.5456	1.3996	864	744	918	816	612	846	714	840	0.0069007	0.0067257	960	0.0064739	1.5685	3.3295	0.51832
untreated-a	4153	4169	4182	2.0245	0.882	2.7926	1.2728	996	864	1038	918	714	966	846	960	0.0064739	0.0069007	1062	0.0065158	1.837	3.2529	0.53549
untreated-a	4151	4164	4183	1.9004	0.8815	2.5993	1.2102	1014	870	1062	918	708	966	822	960	0.0059346	0.0068411	1092	0.0065002	1.5017	3.2574	0.52548
untreated-a	4151	4164	4184	1.7039	0.8815	2.6127	1.2102	990	870	1050	918	708	966	822	960	0.0059346	0.0068411	1098	0.0068548	1.5697	3.5085	0.45465
untreated-a	4164	4183	4200	1.8972	0.95022	2.6043	1.2997	1134	1014	1176	1062	822	1098	966	1092	0.0065002	0.0059346	1200	0.0066123	1.5684	2.9285	0.47138
untreated-a	4297	4312	4328	2.0885	0.88088	2.9235	1.2723	2034	1914	2076	1968	1776	1992	1878	1986	0.0072753	0.0061892	2094	0.0076189	1.6377	3.3747	0.48325
untreated-a	4381	4391	4398	1.7637	0.88174	2.4189	1.2087	870	762	912	810	654	840	750	834	0.0063617	0.0076988	936	0.0077399	1.3057	2.9255	0.52855
untreated-a	4381	4391	4399	1.6994	0.88174	2.3581	1.2087	888	762	936	810	654	840	750	834	0.0063617	0.0076988	966	0.0069404	1.3098	3.0462	0.58072
untreated-a	4392	4400	4406	1.7029	0.91996	2.23	1.2381	984	876	1032	924	750	966	840	960	0.0063484	0.0065193	1062	0.0068376	1.4415	2.9404	0.48448
untreated-a	4392	4400	4407	1.9	0.91996	2.6639	1.2381	984	876	1050	924	750	966	840	960	0.0063484	0.0065193	1062	0.0055063	1.7049	2.9771	0.51209
untreated-a	4391	4399	4409	1.7052	0.84968	2.5518	1.179	1008	888	1062	936	750	972	840	966	0.0069404	0.0063617	1074	0.0079674	1.3748	2.9884	0.48393
untreated-a	4400	4407	4416	1.8964	0.94999	2.854	1.332	1116	984	1176	1050	840	1068	966	1062	0.0055063	0.0063484	1200	0.0061471	1.5117	3.38	0.52699
untreated-a	4400	4407	4417	1.7613	0.94999	2.5465	1.332	1110	984	1164	1050	840	1068	966	1062	0.0055063	0.0063484	1188	0.0067126	1.4416	3.1942	0.50278
untreated-a	4407	4416	4428	2.0232	0.94819	2.6779	1.427	1236	1116	1278	1176	966	1206	1068	1200	0.0061471	0.0055063	1302	0.0071753	1.7	3.3713	0.53614
untreated-a	4407	4416	4429	2.022	0.94819	2.6819	1.427	1236	1116	1284	1176	966	1206	1068	1200	0.0061471	0.0055063	1314	0.0067501	1.6411	3.3768	0.45138
untreated-a	4410	4425	4434	1.7065	0.84903	2.3474	1.2096	1248	1134	1302	1188	1020	1230	1128	1224	0.0060294	0.0054219	1320	0.0070136	1.5743	2.8581	0.51139
untreated-a	4416	4428	4437	2.166	1.0116	2.8699	1.3389	1356	1236	1398	1278	1068	1308	1206	1302	0.0071753	0.0061471	1422	0.0067831	1.5734	3.3872	0.49281
untreated-a	4416	4429	4439	2.0284	1.011	2.8581	1.3409	1344	1236	1398	1284	1068	1320	1206	1314	0.0067501	0.0061471	1422	0.0064745	1.6405	3.3096	0.51059
untreated-a	4429	4439	4449	1.8929	1.0142	2.6768	1.429	1464	1344	1518	1398	1206	1428	1320	1422	0.0064745	0.0067501	1548	0.0064406	1.577	3.3794	0.49187
untreated-a	4429	4439	4451	2.0923	1.0142	2.9301	1.429	1464	1344	1518	1398	1206	1428	1320	1422	0.0064745	0.0067501	1536	0.0061396	1.7684	3.3781	0.51904
untreated-a	4439	4451	4458	1.9586	1.0462	2.9313	1.465	1572	1464	1626	1518	1320	1542	1428	1536	0.0061396	0.0064745	1644	0.0074608	1.5814	3.2546	0.48379
untreated-a	4456	4472	4480	1.9587	0.88485	2.8042	1.2116	1854	1722	1908	1776	1530	1806	1692	1800	0.0058742	0.0044949	1926	0.0064153	1.5695	3.2415	0.51776
untreated-a	4456	4472	4481	1.5706	0.88485	2.4203	1.2116	1842	1722	1902	1776	1530	1806	1692	1800	0.0058742	0.0044949	1932	0.0076354	1.2453	3.1076	0.54605
untreated-a	4472	4481	4490	1.8313	0.78531	2.6758	1.2102	1962	1842	2010	1902	1692	1938	1806	1932	0.0076354	0.0058742	2040	0.0078191	1.5703	3.3836	0.45612
untreated-a	4591	4605	4621	1.963	0.88408	2.4782	1.3056	882	762	924	816	636	834	726	828	0.0070591	0.0075452	954	0.0060054	1.4366	3.0699	0.551
untreated-a	4591	4603	4626	1.8999	0.71967	2.7213	1.1099	906	768	954	822	636	840	726	834	0.0070617	0.0075452	972	0.0069439	1.3118	3.2387	0.55214
untreated-a	4591	4603	4627	1.5043	0.71967	2.0247	1.1099	894	768	942	822	636	840	726	834	0.0070617	0.0075452	966	0.0063071	1.1848	2.5422	0.58077
untreated-a	4605	4621	4642	1.6403	0.98151	2.0896	1.2391	990	882	1032	924	726	960	834	954	0.0060054	0.0070591	1068	0.0069309	1.4463	2.9297	0.52034
untreated-a	4603	4627	4645	1.6998	0.75213	2.2197	1.0124	1044	894	1086	942	726	972	840	966	0.0063071	0.0070617	1140	0.0064164	1.1158	3.1786	0.61791
untreated-a	4603	4626	4648	1.892	0.94995	2.6685	1.3606	996	906	1044	954	726	978	840	972	0.0069439	0.0070617	1056	0.0072628	1.7612	3.0007	0.48466
untreated-a	4603	4626	4649	1.6999	0.94995	2.3459	1.3606	996	906	1044	954	726	978	840	972	0.0069439	0.0070617	1074	0.0071196	1.5082	2.9925	0.5233
untreated-a	4620	4640	4666	1.7625	0.81898	2.4761	1.0778	1122	996	1170	1044	834	1092	960	1086	0.0064156	0.0057502	1194	0.0074129	1.4452	3.0642	0.5117
untreated-a	4627	4645	4672	1.7017	0.84991	2.2833	1.1098	1152	1044	1194	1086	840	1146	972	1140	0.0064164	0.0063071	1224	0.0073999	1.5687	2.8443	0.58809
untreated-a	4627	4645	4673	1.5098	0.84991	2.0838	1.1098	1152	1044	1200	1086	840	1146	972	1140	0.0064164	0.0063071	1230	0.0072236	1.5103	2.6775	0.59774
untreated-a	4640	4666	4679	1.6365	0.88124	2.5348	1.238	1212	1122	1266	1170	960	1200	1092	1194	0.0074129	0.0064156	1296	0.0083861	1.5695	3.383	0.43786
untreated-a	4645	4672	4684	1.7637	0.85083	2.6136	1.1416	1254	1152	1308	1194	972	1230	1146	1224	0.0073999	0.0064164	1320	0.0070488	1.5756	2.9221	0.52087
untreated-a	4645	4673	4686	1.4371	0.75491	2.0868	1.0419	1260	1152	1314	1200	972	1236	1146	1230	0.0072236	0.0064164	1344	0.0070019	1.3202	2.778	0.55718
untreated-a	4673	4686	4695	1.7637	0.71857	2.3401	1.0434	1392	1260	1434	1314	1146	1350	1236	1344	0.0070019	0.0072236	1464	0.0065396	1.3764	2.9337	0.58855
untreated-a	4686	4695	4706	1.6455	0.88187	2.4226	1.1701	1488	1392	1542	1434	1236	1470	1350	1464	0.0065396	0.0070019	1560	0.0071463	1.4375	2.8011	0.58498
untreated-a	4686	4695	4707	1.8328	0.88187	2.4775	1.1701	1506	1392	1548	1434	1236	1470	1350	1464	0.0065396	0.0070019	1572	0.007296	1.3749	2.9828	0.50922
untreated-a	4695	4706	4714	1.6367	0.82273	2.3541	1.2113	1602	1488	1650	1542	1350	1566	1470	1560	0.0071463	0.0065396	1668	0.0069961	1.4439	2.7436	0.56181
untreated-a	4695	4706	4715	1.9647	0.82273	2.802	1.2113	1620	1488	1662	1542	1350	1566	1470	1560	0.0071463	0.0065396	1680	0.0073604	1.3736	3.1893	0.51975
untreated-a	4706	4714	4729	1.6345	0.81833	2.2841	1.177	1704	1602	1746	1650	1470	1674	1566	1668	0.0069961	0.0071463	1764	0.0079002	1.3098	2.6812	0.46697
untreated-a	4864	4882	4900	1.8977	0.84922	2.4784	1.2329	912	780	960	828	666	864	762	858	0.0078522	0.0077605	966	0.0066602	1.4403	3.1897	0.48234
untreated-a	5005	5021	5034	1.579	0.78153	2.4105	1.1392	1806	1716	1866	1764	1566	1800	1686	1794	0.0072956	0.0069472	1890	0.0078351	1.5126	2.932	0.47464
untreated-a	5005	5021	5035	1.5762	0.78153	1.8321	1.1392	1812	1716	1836	1764	1566	1800	1686	1794	0.0072956	0.0069472	1896	0.0081099	1.3766	2.993	0.44804
untreated-a	5005	5022	5036	1.5029	0.88567	2.0249	1.172	1812	1728	1854	1764	1566	1800	1686	1794	0.0069362	0.0069472	1884	0.0077206	1.3736	2.67	0.58731
untreated-a	5005	5022	5037	1.7698	0.88567	2.4781	1.172	1818	1728	1860	1764	1566	1800	1686	1794	0.0069362	0.0069472	1878	0.0085421	1.5053	2.9948	0.54857
untreated-a	5022	5036	5050	1.5061	0.75144	2.0916	1.0124	1932	1812	1980	1854	1686	1890	1800	1884	0.0077206	0.0069362	2004	0.0066291	1.3156	2.5388	0.53628
untreated-a	5022	5036	5051	1.5704	0.75144	2.2863	1.0124	1920	1812	1968	1854	1686	1890	1800	1884	0.0077206	0.0069362	1986	0.0073662	1.3097	2.6852	0.53494
untreated-a	5021	5035	5057	1.4448	0.78808	1.8912	0.91603	1932	1812	1974	1836	1686	1902	1800	1896	0.0081099	0.0072956	2004	0.0062187	1.3759	2.4085	0.57705
untreated-a	5036	5050	5075	1.5048	0.75307	2.0318	1.0458	2028	1932	2070	1980	1800	2010	1890	2004	0.0066291	0.0077206	2100	0.0085546	1.311	2.7285	0.56458
untreated-a	5227	5245	5261	1.5699	0.91763	2.2819	1.2112	1380	1296	1434	1338	1140	1374	1248	1368	0.0063878	0.0074487	1470	0.0071773	1.5137	2.9943	0.52143
untreated-a	5245	5261	5277	1.6357	0.78496	2.6698	1.141	1500	1380	1554	1434	1248	1476	1374	1470	0.0071773	0.0063878	1566	0.0086083	1.4393	2.9193	0.48746
untreated-a	78	110	124	1.5771	0.78622	2.0834	1.111	900	798	942	852	654	882	774	876	0.006939	0.0074946	972	0.0076237	1.3179	2.6175	0.58787
untreated-a	78	110	125	1.4388	0.78622	2.0914	1.111	894	798	948	852	654	882	774	876	0.006939	0.0074946	972	0.0070079	1.4453	2.5457	0.53445
untreated-a	443	475	489	1.5771	0.78622	2.0834	1.111	900	798	942	852	654	882	774	876	0.006939	0.0074946	972	0.0076237	1.3179	2.6175	0.58787
untreated-a	443	475	490	1.4388	0.78622	2.0914	1.111	894	798	948	852	654	882	774	876	0.006939	0.0074946	972	0.0070079	1.4453	2.5457	0.53445
untreated-a	870	889	908	2.0209	0.78684	2.4147	1.0463	1326	1164	1350	1212	1002	1272	1152	1266	0.0070418	0.0057071	1386	0.0066546	1.5051	3.0642	0.58226
untreated-a	1827	1845	1854	1.575	0.75269	2.2194	1.0767	1518	1392	1572	1452	1266	1494	1386	1488	0.0066716	0.0065333	1608	0.0068134	1.3869	2.9408	0.52765
untreated-a	1827	1844	1861	1.6961	0.88367	2.1482	1.1772	1524	1410	1572	1458	1266	1524	1386	1518	0.0060185	0.0065333	1626	0.0059939	1.6961	3.0761	0.55186
untreated-a	1827	1844	1862	1.7065	0.88367	2.2842	1.1772	1524	1410	1584	1458	1266	1524	1386	1518	0.0060185	0.0065333	1614	0.0063617	1.7065	2.926	0.55446
untreated-a	1844	1862	1874	1.5754	0.85325	2.2223	1.1421	1644	1524	1698	1584	1386	1620	1524	1614	0.0063617	0.0060185	1734	0.0058672	1.3736	2.7431	0.55861
untreated-a	1844	1862	1875	1.6994	0.85325	2.4157	1.1421	1650	1524	1698	1584	1386	1620	1524	1614	0.0063617	0.0060185	1728	0.0068594	1.3777	2.922	0.54724
untreated-a	2222	2244	2251	1.3733	0.72147	1.9611	0.97965	804	702	858	750	600	792	690	786	0.0075188	0.0080143	900	0.0064142	1.3123	2.5436	0.61339
untreated-a	2244	2251	2262	1.6341	0.68664	2.358	0.98055	960	804	1014	858	690	906	792	900	0.0064142	0.0075188	1038	0.0062292	1.3166	2.9219	0.50684
untreated-a	2280	2291	2309	1.8298	0.91642	2.4744	1.1774	1314	1212	1362	1254	1038	1290	1152	1284	0.0059514	0.0069093	1374	0.0065002	1.5689	2.677	0.54083
untreated-a	2433	2437	2444	1.7044	0.81957	2.6724	1.213	894	768	960	828	642	852	738	846	0.006651	0.0067677	978	0.0065247	1.3819	3.0652	0.48484
untreated-a	2437	2444	2454	2.1614	0.85222	2.8555	1.3362	1056	894	1098	960	738	984	852	978	0.0065247	0.006651	1116	0.0056593	1.5155	3.1304	0.51967
untreated-a	2437	2444	2455	1.9593	0.85222	3.3004	1.3362	1032	894	1116	960	738	984	852	978	0.0065247	0.006651	1128	0.0063268	1.4373	3.5611	0.43577
untreated-a	2444	2454	2457	1.701	1.0807	2.5379	1.4277	1146	1056	1200	1098	852	1122	984	1116	0.0056593	0.0065247	1224	0.0073331	1.4404	3.0549	0.50195
untreated-a	2454	2457	2462	1.7048	0.85052	2.6723	1.269	1254	1146	1326	1200	984	1230	1122	1224	0.0073331	0.0056593	1338	0.0062491	1.5083	2.9261	0.48842
untreated-a	2457	2462	2469	1.9578	0.85238	2.7992	1.3361	1398	1254	1458	1326	1122	1344	1230	1338	0.0062491	0.0073331	1476	0.0057463	1.5663	3.2008	0.51774
untreated-a	2462	2469	2475	1.8978	0.97891	2.4172	1.3996	1500	1398	1548	1458	1230	1482	1344	1476	0.0057463	0.0062491	1572	0.00635	1.6386	2.9342	0.53409
untreated-a	2462	2469	2476	1.7673	0.97891	2.5426	1.3996	1506	1398	1554	1458	1230	1482	1344	1476	0.0057463	0.0062491	1572	0.0078541	1.573	3.0628	0.4822
untreated-a	2803	2824	2842	1.6374	1.046	2.544	1.5585	822	756	870	810	630	822	738	816	0.0073133	0.0070819	882	0.010351	1.6374	2.8697	0.41187
untreated-a	2801	2827	2851	1.6371	0.85052	2.7406	1.1761	912	786	978	846	630	870	750	864	0.0057306	0.0068873	984	0.0071466	1.3104	2.8657	0.51606
untreated-a	2872	2884	2902	1.4389	0.81874	2.3328	1.1101	1260	1152	1344	1206	1020	1242	1128	1236	0.0060062	0.0068187	1362	0.0055339	1.3862	2.6139	0.5274
untreated-a	2872	2884	2903	1.8319	0.81874	2.6628	1.1101	1284	1152	1344	1206	1020	1242	1128	1236	0.0060062	0.0068187	1362	0.0063798	1.3756	2.8683	0.52053
untreated-a	2871	2890	2908	1.5663	0.882	2.4136	1.2652	1302	1200	1368	1254	1020	1284	1164	1278	0.0065919	0.0054819	1380	0.0067628	1.373	2.734	0.55148
untreated-a	2871	2891	2909	1.898	0.88436	2.4156	1.1782	1368	1212	1416	1266	1020	1296	1164	1290	0.0054271	0.0054819	1452	0.0050738	1.3751	3.068	0.5601
untreated-a	2871	2891	2910	1.5069	0.88436	2.097	1.1782	1338	1212	1392	1266	1020	1296	1164	1290	0.0054271	0.0054819	1440	0.0055728	1.2449	2.8016	0.58095
untreated-a	2884	2902	2915	1.5731	0.71945	2.3576	1.1664	1404	1260	1464	1344	1128	1368	1242	1362	0.0055339	0.0060062	1494	0.0067406	1.3165	2.9197	0.54106
untreated-a	2884	2902	2916	1.5768	0.71945	2.2266	1.1664	1416	1260	1464	1344	1128	1368	1242	1362	0.0055339	0.0060062	1488	0.0079317	1.2465	3.0633	0.48849
untreated-a	2890	2908	2920	1.5052	0.78315	2.2765	1.2068	1416	1302	1470	1368	1164	1386	1284	1380	0.0067628	0.0065919	1500	0.0079944	1.2531	2.9101	0.44894
untreated-a	2891	2910	2927	1.4359	0.75344	2.0223	1.0485	1482	1338	1542	1392	1164	1446	1296	1440	0.0055728	0.0054271	1578	0.0058693	1.1849	2.6082	0.59648
untreated-a	2891	2910	2928	2.2076	0.75344	2.6808	1.0485	1512	1338	1542	1392	1164	1446	1296	1440	0.0055728	0.0054271	1566	0.0061279	1.5058	3.1444	0.52878
untreated-a	2891	2909	2930	1.7048	0.949	2.285	1.2078	1482	1368	1536	1416	1164	1458	1296	1452	0.0050738	0.0054271	1566	0.005877	1.5064	2.8132	0.51116
untreated-a	2909	2930	2940	1.6344	0.8524	2.3492	1.1425	1614	1482	1668	1536	1296	1572	1458	1566	0.005877	0.0050738	1704	0.0065992	1.2499	2.9385	0.54684
untreated-a	2910	2927	2946	1.7674	0.71796	2.2861	1.0112	1638	1482	1680	1542	1296	1584	1446	1578	0.0058693	0.0055728	1716	0.0056672	1.3795	2.8137	0.55947
untreated-a	2910	2927	2947	1.5739	0.71796	2.2839	1.0112	1626	1482	1674	1542	1296	1584	1446	1578	0.0058693	0.0055728	1716	0.0068013	1.2544	2.983	0.43687
untreated-a	2930	2940	2956	1.7001	0.8172	2.2263	1.1746	1740	1614	1782	1668	1458	1710	1572	1704	0.0065992	0.005877	1830	0.0062687	1.4374	3.1206	0.52562
untreated-a	2927	2946	2959	1.6342	0.88371	2.1573	1.1431	1746	1638	1800	1680	1446	1722	1584	1716	0.0056672	0.0058693	1842	0.0061262	1.3771	2.9233	0.50407
untreated-a	2927	2947	2960	1.7714	0.78694	2.4022	1.142	1752	1626	1806	1674	1446	1722	1584	1716	0.0068013	0.0058693	1836	0.0061343	1.3748	2.981	0.49476
untreated-a	2940	2956	2973	1.769	0.85006	2.2868	1.1132	1854	1740	1896	1782	1572	1836	1710	1830	0.0062687	0.0065992	1920	0.0071831	1.5082	2.7428	0.56659
untreated-a	2956	2973	2984	1.636	0.88449	2.5431	1.1434	1956	1854	2016	1896	1710	1926	1836	1920	0.0071831	0.0062687	2034	0.0075401	1.3795	2.9375	0.48216
untreated-a	2956	2973	2985	1.636	0.88449	2.2779	1.1434	1986	1854	2040	1896	1710	1926	1836	1920	0.0071831	0.0062687	2064	0.0055234	1.3786	2.7255	0.4994
untreated-a	3342	3370	3380	1.7733	0.88377	2.4092	1.2047	948	822	996	876	678	912	810	906	0.0056781	0.006893	1020	0.0061632	1.5076	2.8686	0.53091
untreated-a	3394	3413	3426	2.0909	0.88328	2.9868	1.1077	1362	1200	1410	1242	1032	1302	1176	1296	0.0060239	0.0059558	1434	0.0065881	1.5683	3.5162	0.46636
untreated-a	3408	3424	3435	1.7013	0.85012	2.3471	1.0792	1470	1332	1518	1374	1152	1416	1290	1410	0.0065177	0.0053989	1536	0.005765	1.3792	2.7343	0.51121
untreated-a	3424	3435	3452	1.9035	0.85064	2.4847	1.1736	1614	1470	1662	1518	1290	1542	1416	1536	0.005765	0.0065177	1698	0.0060524	1.1841	3.2367	0.47642
untreated-a	3435	3452	3472	1.7709	0.95175	2.4219	1.2423	1728	1614	1776	1662	1416	1704	1542	1698	0.0060524	0.005765	1794	0.0071965	1.5773	2.9849	0.48746
untreated-a	3639	3656	3667	2.4017	1.0777	3.4369	1.431	1386	1272	1440	1314	1116	1344	1242	1338	0.0067527	0.0062521	1440	0.0067074	1.7668	3.4369	0.48897
untreated-a	3639	3657	3669	1.835	0.91229	2.7312	1.2686	1392	1284	1440	1332	1116	1356	1242	1350	0.0066472	0.0062521	1458	0.0074224	1.5066	3.1172	0.51411
untreated-a	3639	3657	3670	1.5673	0.91229	2.225	1.2686	1380	1284	1434	1332	1116	1356	1242	1350	0.0066472	0.0062521	1464	0.0066123	1.3157	2.6778	0.47702
untreated-a	3656	3667	3679	2.2842	1.2009	3.0683	1.7185	1488	1386	1536	1440	1242	1446	1344	1440	0.0067074	0.0067527	1548	0.0064166	1.7063	3.4505	0.45783
untreated-a	3657	3669	3682	1.7625	0.91749	2.3321	1.3656	1500	1392	1554	1440	1242	1464	1356	1458	0.0074224	0.0066472	1578	0.0054184	1.5782	2.7358	0.50289
untreated-a	3657	3669	3683	1.5719	0.91749	2.3389	1.3656	1476	1392	1530	1440	1242	1464	1356	1458	0.0074224	0.0066472	1560	0.0071402	1.5088	2.9081	0.43576
untreated-a	3657	3670	3686	1.7077	0.78366	2.2909	1.1125	1482	1380	1524	1434	1242	1470	1356	1464	0.0066123	0.0066472	1554	0.0083547	1.5719	3.1063	0.47836
untreated-a	3670	3686	3695	1.6993	0.85386	2.4654	1.1454	1584	1482	1632	1524	1356	1560	1470	1554	0.0083547	0.0066123	1662	0.0076257	1.4396	3.1275	0.48613
untreated-a	3669	3683	3697	1.7649	0.78593	2.4834	1.1695	1608	1476	1662	1530	1356	1566	1464	1560	0.0071402	0.0074224	1686	0.0061901	1.4475	2.925	0.54736
untreated-a	3669	3682	3701	1.578	0.88126	2.2275	1.166	1632	1500	1692	1554	1356	1584	1464	1578	0.0054184	0.0074224	1716	0.005841	1.2455	2.6028	0.53903
untreated-a	3669	3682	3703	1.5639	0.88126	2.1499	1.166	1638	1500	1686	1554	1356	1584	1464	1578	0.0054184	0.0074224	1728	0.005205	1.3885	2.7402	0.52612
untreated-a	3682	3701	3720	1.5114	0.78899	2.4634	1.1138	1752	1632	1806	1692	1464	1722	1584	1716	0.005841	0.0054184	1830	0.0080556	1.2506	2.8656	0.49436
untreated-a	3682	3701	3721	1.3092	0.78899	1.9585	1.1138	1734	1632	1788	1692	1464	1722	1584	1716	0.005841	0.0054184	1836	0.0065982	1.2458	2.5972	0.50638
untreated-a	3682	3703	3722	1.5129	0.78197	2.0888	1.075	1752	1638	1800	1686	1464	1734	1584	1728	0.005205	0.0054184	1830	0.0074055	1.3796	2.6184	0.63879
untreated-a	3682	3703	3723	1.506	0.78197	1.961	1.075	1758	1638	1812	1686	1464	1734	1584	1728	0.005205	0.0054184	1860	0.005602	1.3742	2.5939	0.45172
untreated-a	3703	3722	3733	1.6996	0.75647	2.536	1.0444	1878	1752	1932	1800	1584	1836	1734	1830	0.0074055	0.005205	1938	0.0067214	1.3814	2.6598	0.55868
untreated-a	3703	3722	3734	1.3814	0.75647	1.8328	1.0444	1854	1752	1908	1800	1584	1836	1734	1830	0.0074055	0.005205	1968	0.005967	1.3116	2.7368	0.53078
untreated-a	3701	3721	3735	1.6966	0.65461	2.3402	0.97923	1902	1734	1944	1788	1584	1842	1722	1836	0.0065982	0.005841	1968	0.0067803	1.2493	2.7365	0.46631
untreated-a	3703	3723	3739	1.5054	0.753	2.0871	0.98049	1902	1758	1956	1812	1584	1866	1734	1860	0.005602	0.005205	2004	0.0060761	1.2485	2.8403	0.49684
untreated-a	3852	3872	3884	1.5752	0.78308	1.9589	1.0483	984	870	1032	912	720	948	846	942	0.0067578	0.0064421	1068	0.0059231	1.3177	2.6011	0.52098
untreated-a	3852	3872	3885	1.3106	0.78308	1.8306	1.0483	966	870	1026	912	720	948	846	942	0.0067578	0.0064421	1062	0.0065942	1.1797	2.4828	0.54654
untreated-a	3851	3864	3886	1.8334	0.9184	2.6737	1.2089	1008	876	1062	930	720	966	822	960	0.0054982	0.0057533	1086	0.0064601	1.5048	3.1712	0.47631
untreated-a	3851	3864	3887	1.7552	0.9184	2.35	1.2089	1002	876	1050	930	720	966	822	960	0.0054982	0.0057533	1074	0.0061524	1.51	2.8729	0.54317
untreated-a	3872	3885	3895	1.5762	0.65528	2.2928	0.91532	1122	966	1176	1026	846	1068	948	1062	0.0065942	0.0067578	1200	0.0066528	1.1861	2.6793	0.52963
untreated-a	3872	3885	3896	1.7671	0.65528	2.3521	0.91532	1128	966	1176	1026	846	1068	948	1062	0.0065942	0.0067578	1206	0.0057483	1.2486	2.8515	0.45528
untreated-a	3872	3884	3897	1.5698	0.7876	2.3572	0.97945	1128	984	1188	1032	846	1074	948	1068	0.0059231	0.0067578	1206	0.0061114	1.3161	2.7347	0.47879
untreated-a	3872	3884	3898	1.5774	0.7876	2.0944	0.97945	1122	984	1170	1032	846	1074	948	1068	0.0059231	0.0067578	1200	0.0065398	1.1875	2.6716	0.60148
untreated-a	3864	3887	3900	1.5029	0.87759	2.3498	1.175	1116	1002	1182	1050	822	1080	966	1074	0.0061524	0.0054982	1224	0.0064869	1.3121	3.1924	0.47477
untreated-a	3884	3898	3910	1.5166	0.78868	2.0871	1.0472	1236	1122	1290	1170	948	1206	1074	1200	0.0065398	0.0059231	1332	0.0064427	1.2495	2.7497	0.55256
untreated-a	3884	3898	3911	1.5691	0.78868	2.1537	1.0472	1248	1122	1302	1170	948	1206	1074	1200	0.0065398	0.0059231	1332	0.0059035	1.3859	2.7388	0.58163
untreated-a	3885	3895	3913	1.6316	0.78808	2.2821	1.1464	1236	1122	1290	1176	948	1206	1068	1200	0.0066528	0.0065942	1332	0.006321	1.4414	3.0649	0.44684
untreated-a	3884	3897	3914	1.96	0.7849	2.4779	1.1786	1266	1128	1308	1188	948	1212	1074	1206	0.0061114	0.0059231	1326	0.0060676	1.3758	2.8066	0.48733
untreated-a	3884	3897	3915	1.508	0.7849	2.4148	1.1786	1254	1128	1320	1188	948	1212	1074	1206	0.0061114	0.0059231	1326	0.0071902	1.1797	2.5968	0.50978
untreated-a	3897	3915	3925	2.0232	0.75399	2.2873	1.2074	1404	1254	1428	1320	1074	1332	1212	1326	0.0071902	0.0061114	1440	0.0075661	1.1846	2.611	0.48479
untreated-a	3898	3910	3927	1.5078	0.7583	2.156	1.0435	1362	1236	1404	1290	1074	1338	1206	1332	0.0064427	0.0065398	1470	0.0071252	1.377	3.436	0.50349
untreated-a	3898	3911	3929	1.7037	0.78454	2.2245	1.0768	1374	1248	1416	1302	1074	1338	1206	1332	0.0059035	0.0065398	1464	0.0066963	1.3829	3.1249	0.55693
untreated-a	3898	3911	3930	1.8321	0.78454	2.4745	1.0768	1398	1248	1446	1302	1074	1338	1206	1332	0.0059035	0.0065398	1458	0.0061657	1.2485	2.6786	0.54698
untreated-a	3911	3929	3944	1.7594	0.85185	2.3534	1.1123	1506	1374	1554	1416	1206	1470	1338	1464	0.0066963	0.0059035	1590	0.0059931	1.5723	3.0723	0.50748
untreated-a	3911	3929	3945	1.6995	0.85185	2.2245	1.1123	1488	1374	1536	1416	1206	1470	1338	1464	0.0066963	0.0059035	1572	0.0058151	1.5707	2.8046	0.54788
untreated-a	3910	3927	3947	1.5908	0.75391	2.0877	1.078	1464	1362	1506	1404	1206	1476	1338	1470	0.0071252	0.0064427	1542	0.008538	1.6379	2.8563	0.48437
untreated-a	3927	3947	3953	1.8304	0.7954	2.6725	1.0438	1590	1464	1638	1506	1338	1548	1476	1542	0.008538	0.0071252	1662	0.0077695	1.308	3.1782	0.43945
untreated-a	3929	3944	3959	1.5362	0.87971	2.1533	1.1767	1590	1506	1644	1554	1338	1596	1470	1590	0.0059931	0.0066963	1680	0.0065816	1.5696	2.7375	0.53841
untreated-a	3929	3944	3960	1.5362	0.87971	2.0284	1.1767	1590	1506	1644	1554	1338	1596	1470	1590	0.0059931	0.0066963	1680	0.0071902	1.3789	2.6023	0.46069
untreated-a	3944	3959	3969	1.7727	0.76809	2.6271	1.0766	1728	1590	1788	1644	1470	1686	1596	1680	0.0065816	0.0059931	1800	0.0066302	1.3803	2.9417	0.50037
untreated-a	3944	3959	3970	1.4458	0.76809	2.1538	1.0766	1704	1590	1752	1644	1470	1686	1596	1680	0.0065816	0.0059931	1782	0.0074286	1.3819	2.6658	0.48089
untreated-a	3959	3969	3985	1.7686	0.88635	2.5441	1.3136	1848	1728	1902	1788	1596	1806	1686	1800	0.0066302	0.0065816	1920	0.0065517	1.4485	2.9293	0.46871
untreated-a	4075	4091	4106	1.4401	0.78774	1.8283	1.1119	906	786	948	840	648	864	750	858	0.0059216	0.0063822	984	0.0060985	1.1821	2.4068	0.58793
untreated-a	4075	4091	4107	1.3791	0.78774	1.9591	1.1119	894	786	948	840	648	864	750	858	0.0059216	0.0063822	990	0.0064899	1.1808	2.6112	0.51981
untreated-a	4081	4098	4111	1.3809	0.71827	1.8248	1.0142	924	816	972	864	678	894	786	888	0.0069653	0.0063787	1014	0.0067724	1.1787	2.5516	0.51557
untreated-a	4081	4098	4112	1.6339	0.71827	2.0931	1.0142	942	816	984	864	678	894	786	888	0.0069653	0.0063787	1014	0.0063689	1.2511	2.743	0.43304
untreated-a	4075	4090	4113	1.7672	0.78577	2.5312	1.0429	918	792	972	840	648	900	750	894	0.0061383	0.0063822	996	0.0067188	1.5822	2.942	0.51376
untreated-a	4075	4090	4114	1.57	0.78577	2.221	1.0429	930	792	978	840	648	900	750	894	0.0061383	0.0063822	1020	0.0068677	1.3817	2.9929	0.54542
untreated-a	4091	4106	4122	1.3728	0.72007	2.0298	0.91417	1038	906	1092	948	750	990	864	984	0.0060985	0.0059216	1134	0.0063472	1.1171	2.7518	0.55612
untreated-a	4091	4106	4123	1.507	0.72007	2.0288	0.91417	1032	906	1086	948	750	990	864	984	0.0060985	0.0059216	1116	0.0057651	1.1762	2.4217	0.64378
untreated-a	4091	4107	4124	1.4405	0.68955	2.2241	0.97953	1032	894	1098	948	750	996	864	990	0.0064899	0.0059216	1104	0.0066929	1.1185	2.3471	0.4509
untreated-a	4091	4107	4125	1.6354	0.68955	2.2266	0.97953	1038	894	1086	948	750	996	864	990	0.0064899	0.0059216	1110	0.0062945	1.3072	2.6821	0.49367
untreated-a	4098	4111	4128	1.4425	0.69047	1.9592	0.91239	1050	924	1104	972	786	1020	894	1014	0.0067724	0.0069653	1128	0.0070236	1.1809	2.5404	0.45108
untreated-a	4090	4114	4135	1.4437	0.785	2.2212	1.1105	1032	930	1092	978	750	1026	900	1020	0.0068677	0.0061383	1122	0.0068779	1.4451	2.6764	0.43777
untreated-a	4107	4124	4140	1.5078	0.72023	2.1639	1.112	1164	1032	1212	1098	864	1110	996	1104	0.0066929	0.0064899	1242	0.0066248	1.1911	2.6812	0.52252
untreated-a	4107	4124	4141	1.5148	0.72023	2.1556	1.112	1152	1032	1206	1098	864	1110	996	1104	0.0066929	0.0064899	1230	0.007275	1.0481	2.6042	0.49773
untreated-a	4106	4123	4144	1.4391	0.75348	2.0243	1.0144	1152	1032	1206	1086	864	1122	990	1116	0.0057651	0.0060985	1248	0.0070222	1.2477	2.8753	0.5169
untreated-a	4106	4123	4145	1.5139	0.75348	1.8918	1.0144	1176	1032	1224	1086	864	1122	990	1116	0.0057651	0.0060985	1254	0.0058731	1.0532	2.3526	0.63285
untreated-a	4124	4140	4159	1.5663	0.75389	2.2842	1.0819	1278	1164	1332	1212	996	1248	1110	1242	0.0066248	0.0066929	1350	0.0060497	1.4527	2.5411	0.53704
untreated-a	4123	4144	4162	1.836	0.71957	2.6793	1.0122	1284	1152	1344	1206	990	1254	1122	1248	0.0070222	0.0057651	1344	0.0065601	1.5082	2.6793	0.48097
untreated-a	4487	4512	4536	1.5051	0.78752	2.0266	1.0428	1530	1398	1584	1446	1224	1482	1344	1476	0.0054993	0.0050724	1638	0.0047298	1.2581	2.3274	0.42026
untreated-a	4487	4511	4545	1.9031	0.8513	2.4107	1.1758	1572	1416	1626	1476	1224	1530	1344	1524	0.0052844	0.0050724	1668	0.0049463	1.5085	2.9981	0.4488
untreated-a	4487	4511	4546	1.6993	0.8513	2.661	1.1758	1554	1416	1626	1476	1224	1530	1344	1524	0.0052844	0.0050724	1650	0.0058029	1.5704	2.9831	0.35047
untreated-a	4511	4545	4572	1.4433	0.95155	1.7638	1.2053	1686	1572	1740	1626	1344	1674	1530	1668	0.0049463	0.0052844	1806	0.0044537	1.3119	2.4091	0.43866
untreated-a	5099	5112	5130	1.5726	0.78813	2.5385	1.2129	1518	1416	1584	1482	1278	1518	1392	1512	0.0065158	0.006586	1602	0.0076247	1.5726	2.9439	0.47231
untreated-a	5098	5116	5134	1.4463	0.7533	2.4049	1.145	1542	1416	1614	1488	1278	1524	1404	1518	0.0064683	0.0060678	1656	0.0066673	1.3095	3.1849	0.44216
untreated-a	5098	5116	5135	1.8984	0.7533	3.1339	1.145	1554	1416	1626	1488	1278	1524	1404	1518	0.0064683	0.0060678	1632	0.0069001	1.5709	3.3132	0.44978
untreated-a	5098	5115	5136	1.6851	0.7834	2.8147	1.0484	1524	1422	1596	1458	1278	1536	1404	1530	0.0072874	0.0060678	1620	0.0075015	1.8225	3.2034	0.44167
untreated-a	5098	5115	5137	1.6851	0.7834	2.5434	1.0484	1524	1422	1590	1458	1278	1536	1404	1530	0.0072874	0.0060678	1608	0.0073314	1.7692	2.8616	0.55485
untreated-a	5115	5136	5146	1.7003	0.84253	2.2894	1.4074	1644	1524	1680	1596	1404	1626	1536	1620	0.0075015	0.0072874	1680	0.0072975	1.6372	2.2894	0.42203
untreated-a	5116	5135	5149	1.703	0.94918	2.7342	1.5669	1644	1554	1716	1626	1404	1638	1524	1632	0.0069001	0.0064683	1746	0.0068835	1.7026	3.444	0.37055
untreated-a	5304	5314	5333	1.6394	0.81797	2.2856	1.1439	960	846	1008	900	720	936	822	930	0.0071364	0.0073934	1038	0.0068195	1.4467	2.8017	0.54936
untreated-a	5304	5314	5334	1.6425	0.81797	2.282	1.1439	966	846	1020	900	720	936	822	930	0.0071364	0.0073934	1062	0.0064862	1.3082	2.8754	0.53974
untreated-a	5304	5315	5341	1.4434	0.88335	2.025	1.2063	960	876	1008	918	720	948	822	942	0.007256	0.0073934	1032	0.0076078	1.3098	2.5495	0.47111
untreated-a	5304	5315	5342	1.7674	0.88335	2.5482	1.2063	966	876	1014	918	720	948	822	942	0.007256	0.0073934	1038	0.0071474	1.5768	2.9881	0.43058
untreated-a	5315	5341	5347	1.5028	0.72172	2.2189	1.0125	1080	960	1128	1008	822	1038	948	1032	0.0076078	0.007256	1152	0.0065411	1.1828	2.5459	0.42258
untreated-a	5314	5333	5349	1.7667	0.81971	2.4138	1.1428	1074	960	1122	1008	822	1044	936	1038	0.0068195	0.0071364	1146	0.0072327	1.4468	2.9291	0.46221
untreated-a	5314	5333	5350	1.5653	0.81971	2.1561	1.1428	1080	960	1128	1008	822	1044	936	1038	0.0068195	0.0071364	1164	0.0063895	1.3133	2.7339	0.46147
untreated-a	5333	5350	5368	1.7665	0.78263	2.4836	1.078	1218	1080	1272	1128	936	1170	1044	1164	0.0063895	0.0068195	1284	0.0064656	1.3192	2.7291	0.45254
untreated-a	5333	5350	5369	1.8966	0.78263	2.6053	1.078	1224	1080	1272	1128	936	1170	1044	1164	0.0063895	0.0068195	1320	0.0061887	1.3876	3.4565	0.45682
untreated-a	5389	5405	5426	1.7035	0.75353	2.1581	1.0768	1590	1458	1620	1506	1320	1560	1434	1554	0.0064443	0.006141	1644	0.0076523	1.3735	2.6147	0.48403
untreated-a	5389	5405	5427	1.3842	0.75353	1.9635	1.0768	1560	1458	1608	1506	1320	1560	1434	1554	0.0064443	0.006141	1656	0.006867	1.3842	2.677	0.56623
untreated-a	5389	5406	5429	1.3942	0.78774	1.7662	0.97935	1566	1464	1620	1512	1320	1572	1434	1566	0.0058014	0.006141	1692	0.0058504	1.3154	2.6194	0.50007
untreated-a	5390	5411	5432	1.5071	0.65663	2.0893	0.94764	1626	1470	1680	1536	1320	1608	1452	1602	0.0055453	0.0059476	1704	0.0061529	1.3728	2.4868	0.55718
untreated-a	5405	5426	5438	1.6442	0.85173	2.3543	1.0791	1698	1590	1752	1620	1434	1650	1560	1644	0.0076523	0.0064443	1770	0.0060248	1.2459	2.4889	0.45948
untreated-a	5405	5427	5439	1.5043	0.69211	2.2816	0.98175	1704	1560	1758	1608	1434	1662	1560	1656	0.006867	0.0064443	1788	0.0069047	1.3101	2.8534	0.46996
untreated-a	5405	5427	5440	1.4425	0.69211	1.9014	0.98175	1704	1560	1752	1608	1434	1662	1560	1656	0.006867	0.0064443	1806	0.0062333	1.2501	2.8131	0.53455
untreated-a	5406	5429	5447	1.4389	0.69709	2.0893	0.88312	1734	1566	1794	1620	1434	1698	1572	1692	0.0058504	0.0058014	1836	0.0057279	1.2453	2.6107	0.53514
untreated-a	5406	5429	5448	1.5685	0.69709	2.2056	0.88312	1746	1566	1800	1620	1434	1698	1572	1692	0.0058504	0.0058014	1824	0.0061011	1.247	2.6676	0.60307
untreated-a	5427	5440	5461	1.5087	0.72125	2.1558	0.95068	1830	1704	1884	1752	1560	1812	1662	1806	0.0062333	0.006867	1914	0.0070476	1.3109	2.741	0.49643
untreated-a	5429	5447	5466	1.4367	0.71944	2.1583	1.0447	1860	1734	1920	1794	1572	1842	1698	1836	0.0057279	0.0058504	1944	0.0067463	1.1804	2.5519	0.49443
untreated-a	5568	5588	5607	1.4431	0.65804	2.2857	0.94879	936	822	996	870	666	912	792	906	0.0070306	0.007499	1014	0.008039	1.1786	2.6664	0.45147
untreated-a	5568	5588	5608	1.574	0.65804	2.2286	0.94879	960	822	1008	870	666	912	792	906	0.0070306	0.007499	1044	0.0073154	1.1867	2.9864	0.47825
untreated-a	5655	5669	5686	1.9567	0.91525	2.7421	1.0467	1458	1344	1506	1368	1206	1428	1320	1422	0.0067625	0.007083	1518	0.0069986	1.6358	3.0002	0.38002
untreated-a	5655	5669	5687	1.6409	0.91525	2.4748	1.0467	1458	1344	1512	1368	1206	1428	1320	1422	0.0067625	0.007083	1530	0.0072733	1.3091	2.8628	0.47241
untreated-a	5655	5670	5689	1.5043	0.91761	2.2891	1.3049	1458	1362	1512	1410	1206	1434	1320	1428	0.0063835	0.007083	1536	0.0070116	1.3099	2.6647	0.48701
untreated-a	5669	5687	5700	1.5677	0.82047	2.2913	1.2374	1548	1458	1602	1512	1320	1536	1428	1530	0.0072733	0.0067625	1626	0.0069902	1.4386	2.8022	0.44119
untreated-a	5670	5689	5704	1.3123	0.75214	2.0891	1.1446	1554	1458	1614	1512	1320	1542	1434	1536	0.0070116	0.0063835	1662	0.0072681	1.3225	2.9927	0.46817
untreated-a	5670	5689	5705	1.705	0.75214	2.3471	1.1446	1584	1458	1638	1512	1320	1542	1434	1536	0.0070116	0.0063835	1656	0.0064956	1.243	2.7283	0.43827
untreated-a	5689	5704	5730	1.4418	0.65613	2.7927	1.0446	1674	1554	1752	1614	1434	1668	1542	1662	0.0072681	0.0070116	1752	0.0080951	1.3779	2.7927	0.42747
untreated-a	5704	5730	5745	1.5126	0.72092	2.1597	1.3963	1782	1674	1842	1752	1542	1758	1668	1752	0.0080951	0.0072681	1860	0.0065526	1.3165	2.5997	0.37844
untreated-a	6316	6328	6335	1.6348	0.63407	2.4103	0.79642	1818	1644	1872	1674	1584	1770	1680	1764	0.0059744	0.0067029	1896	0.0072532	1.1241	2.8088	0.40866
untreated-a	6316	6328	6336	1.7732	0.63407	2.4058	0.79642	1818	1644	1872	1674	1584	1770	1680	1764	0.0059744	0.0067029	1908	0.005945	1.5109	3.1236	0.43275
untreated-a	6328	6335	6355	1.9009	0.81738	2.9292	1.2052	1956	1818	2028	1872	1680	1902	1770	1896	0.0072532	0.0059744	2028	0.0058324	1.4459	2.9292	0.36475
untreated-a	6904	6926	6955	1.6429	0.81605	2.2227	0.9493	1410	1260	1458	1290	1098	1362	1206	1356	0.0048442	0.0057119	1476	0.0058103	1.3776	2.4803	0.48061
untreated-a	7785	7818	7834	1.6403	0.88385	2.2848	1.308	1554	1440	1602	1500	1236	1506	1404	1500	0.005377	0.0056358	1614	0.0066733	1.1801	2.4771	0.49066
untreated-a	7785	7819	7839	1.6401	0.81887	2.2869	1.0465	1542	1440	1602	1482	1236	1530	1404	1524	0.0062465	0.0056358	1626	0.0064115	1.5098	2.7984	0.56103
untreated-a	7785	7819	7840	1.5102	0.81887	2.2175	1.0465	1560	1440	1626	1482	1236	1530	1404	1524	0.0062465	0.0056358	1644	0.0063984	1.2494	2.5402	0.4582
untreated-a	7819	7839	7854	1.5762	0.82006	2.3537	1.1435	1674	1542	1728	1602	1404	1632	1530	1626	0.0064115	0.0062465	1770	0.0067162	1.2466	2.9904	0.45407
untreated-a	7819	7840	7859	1.3758	0.75512	2.0256	1.1088	1680	1560	1728	1626	1404	1650	1530	1644	0.0063984	0.0062465	1758	0.007204	1.1802	2.5421	0.51253
untreated-a	7855	7871	7912	1.6999	0.72053	2.3432	0.81744	1992	1812	2040	1860	1632	1950	1758	1944	0.004642	0.0061605	2052	0.0066274	1.3069	2.5395	0.4373
untreated-a	8099	8125	8151	1.6914	0.78906	2.3551	1.1081	1242	1116	1296	1170	942	1188	1080	1182	0.0065065	0.0066384	1314	0.0069744	1.1861	2.7411	0.41746
untreated-a	8099	8124	8158	1.9035	0.75082	2.6662	1.1125	1260	1116	1296	1170	942	1200	1080	1194	0.0069376	0.0066384	1296	0.0070482	1.3801	2.6662	0.49482
untreated-a	8099	8124	8159	1.5082	0.75082	2.4179	1.1125	1236	1116	1296	1170	942	1200	1080	1194	0.0069376	0.0066384	1308	0.0069314	1.2492	2.5415	0.43022
untreated-a	8124	8158	8172	1.63	0.95173	2.023	1.3331	1344	1260	1374	1296	1080	1302	1200	1296	0.0070482	0.0069376	1404	0.0083019	1.2459	2.669	0.43631
untreated-a	8124	8158	8173	1.7681	0.95173	2.3471	1.3331	1338	1260	1386	1296	1080	1302	1200	1296	0.0070482	0.0069376	1404	0.0067984	1.3809	2.804	0.40523
untreated-a	8491	8526	8561	1.6416	0.75224	2.1603	0.97858	1104	960	1146	1002	816	1044	924	1038	0.0065225	0.007827	1176	0.0061379	1.3157	2.8131	0.55521
untreated-a	8491	8526	8562	1.5773	0.75224	1.9714	0.97858	1086	960	1128	1002	816	1044	924	1038	0.0065225	0.007827	1158	0.0065658	1.1154	2.5444	0.52569
untreated-b	936	956	966	1.8961	0.95332	2.871	1.344	1668	1596	1716	1638	1494	1668	1584	1662	0.009015	0.0085661	1740	0.0095004	1.8961	3.6474	0.54068
untreated-b	936	956	967	1.8999	0.95332	2.678	1.344	1680	1596	1722	1638	1494	1668	1584	1662	0.009015	0.0085661	1734	0.0090683	1.6335	3.059	0.56069
untreated-b	945	959	970	1.6349	0.7184	2.2957	1.0795	1698	1602	1740	1644	1518	1680	1590	1674	0.0093337	0.0093867	1764	0.0087158	1.3724	2.9383	0.56768
untreated-b	945	958	974	1.6345	0.91676	2.4169	1.3122	1686	1620	1734	1662	1518	1692	1590	1686	0.0088606	0.0093867	1758	0.0092285	1.6365	3.1049	0.57249
untreated-b	1299	1316	1336	1.7631	0.94579	2.9882	1.434	1560	1488	1620	1536	1386	1560	1470	1554	0.00907	0.007939	1632	0.0095166	1.7631	3.363	0.58618
untreated-b	1299	1316	1337	1.6977	0.94579	2.4248	1.434	1572	1488	1614	1536	1386	1560	1470	1554	0.00907	0.007939	1638	0.0084128	1.6346	3.0665	0.54088
untreated-b	1316	1336	1351	1.6815	0.88153	2.2855	1.4941	1632	1560	1674	1620	1470	1638	1560	1632	0.0095166	0.00907	1716	0.0090126	1.6397	3.2669	0.53834
untreated-b	1316	1337	1352	1.896	0.84883	2.6613	1.2124	1662	1572	1704	1614	1470	1644	1560	1638	0.0084128	0.00907	1716	0.0088616	1.5707	3.0062	0.55784
untreated-b	1316	1337	1353	1.5052	0.84883	2.2158	1.2124	1656	1572	1704	1614	1470	1644	1560	1638	0.0084128	0.00907	1746	0.0081473	1.4394	3.1916	0.5576
untreated-b	1995	2013	2033	1.7665	0.81758	2.6025	1.2732	1434	1338	1476	1386	1260	1398	1332	1392	0.0086189	0.0098041	1500	0.0091558	1.4477	3.4316	0.54959
untreated-b	1990	2020	2041	1.6323	0.84928	2.4159	1.2359	1482	1392	1524	1434	1248	1464	1374	1458	0.0084862	0.0080327	1542	0.0089346	1.5109	2.8791	0.56901
untreated-b	1990	2021	2042	1.7653	0.91308	2.6142	1.2728	1470	1392	1512	1434	1248	1470	1374	1464	0.0081195	0.0080327	1542	0.0099445	1.7653	3.5099	0.50703
untreated-b	2013	2033	2048	1.7062	0.88323	2.6824	1.3012	1506	1434	1548	1476	1332	1506	1398	1500	0.0091558	0.0086189	1572	0.010633	1.7062	3.3822	0.55407
untreated-b	2020	2041	2056	1.6342	0.81617	2.4829	1.2079	1566	1482	1614	1524	1374	1548	1464	1542	0.0089346	0.0084862	1632	0.0089768	1.4387	2.9791	0.55701
untreated-b	2020	2041	2057	1.6351	0.81617	2.4156	1.2079	1566	1482	1608	1524	1374	1548	1464	1542	0.0089346	0.0084862	1644	0.0088362	1.4415	3.358	0.58193
untreated-b	2021	2042	2058	2.0207	0.88266	3.0709	1.3071	1560	1470	1602	1512	1374	1548	1470	1542	0.0099445	0.0081195	1626	0.0096291	1.7652	3.6431	0.45312
untreated-b	2041	2056	2080	1.5716	0.81712	2.3591	1.2415	1650	1566	1698	1614	1464	1638	1548	1632	0.0089768	0.0089346	1716	0.0091188	1.3762	2.8616	0.54588
untreated-b	2041	2057	2082	1.679	0.81756	2.5485	1.2078	1644	1566	1698	1608	1464	1650	1548	1644	0.0088362	0.0089346	1722	0.0087021	1.7697	3.2557	0.54896
untreated-b	2056	2080	2094	1.8321	0.78582	2.8477	1.1795	1746	1650	1788	1698	1548	1722	1638	1716	0.0091188	0.0089768	1800	0.010165	1.4377	3.1912	0.56365
untreated-b	2709	2719	2728	1.4627	0.8211	2.3527	1.2984	1380	1320	1440	1368	1218	1386	1296	1380	0.0093004	0.0099153	1458	0.0098671	1.3775	2.8017	0.54541
untreated-b	2709	2719	2729	1.6331	0.8211	2.5398	1.2984	1398	1320	1440	1368	1218	1386	1296	1380	0.0093004	0.0099153	1452	0.0095025	1.5029	2.8138	0.56394
untreated-b	2719	2729	2745	1.7669	0.81656	2.4145	1.2699	1476	1398	1512	1440	1296	1458	1386	1452	0.0095025	0.0093004	1536	0.0089773	1.5713	3.0537	0.61415
untreated-b	2719	2729	2746	1.5065	0.81656	2.6117	1.2699	1476	1398	1530	1440	1296	1458	1386	1452	0.0095025	0.0093004	1542	0.0095914	1.3771	2.8786	0.55589
untreated-b	2719	2728	2747	1.8258	0.73133	3.0469	1.1763	1500	1380	1542	1440	1296	1464	1386	1458	0.0098671	0.0093004	1554	0.011039	1.3816	3.4378	0.56572
untreated-b	2719	2728	2748	1.6355	0.73133	2.4863	1.1763	1482	1380	1530	1440	1296	1464	1386	1458	0.0098671	0.0093004	1554	0.0086847	1.5099	3.1297	0.55206
untreated-b	2729	2745	2755	1.5751	0.88344	2.4152	1.2073	1548	1476	1602	1512	1386	1542	1458	1536	0.0089773	0.0095025	1614	0.0081673	1.4448	2.6662	0.57305
untreated-b	2729	2745	2756	1.7003	0.88344	2.5472	1.2073	1548	1476	1590	1512	1386	1542	1458	1536	0.0089773	0.0095025	1614	0.0094308	1.6351	3.2086	0.57493
untreated-b	2728	2748	2761	1.8358	0.81777	2.7821	1.2431	1572	1482	1614	1530	1386	1560	1464	1554	0.0086847	0.0098671	1644	0.0096382	1.7052	3.6822	0.53929
untreated-b	2745	2755	2767	1.9022	0.78756	2.8099	1.2076	1656	1548	1704	1602	1458	1620	1542	1614	0.0081673	0.0089773	1716	0.0091694	1.1823	3.3143	0.56789
untreated-b	2755	2767	2783	1.8309	0.9511	2.7974	1.405	1728	1656	1776	1704	1542	1722	1620	1716	0.0091694	0.0081673	1794	0.010409	1.7054	3.5117	0.55234
untreated-b	2755	2767	2784	1.763	0.9511	2.6103	1.405	1728	1656	1776	1704	1542	1722	1620	1716	0.0091694	0.0081673	1794	0.0095349	1.7022	3.3187	0.5463
untreated-b	3635	3657	3684	1.5753	0.91526	2.6114	1.5241	1512	1446	1560	1500	1326	1512	1416	1506	0.0094562	0.0082515	1578	0.010349	1.5753	3.0555	0.51557
untreated-b	3635	3658	3685	1.895	0.85265	2.8065	1.3358	1536	1446	1584	1500	1326	1530	1416	1524	0.0082813	0.0082515	1596	0.0081088	1.8969	3.1827	0.54483
untreated-b	3635	3658	3686	1.5679	0.85265	2.4	1.3358	1542	1446	1596	1500	1326	1530	1416	1524	0.0082813	0.0082515	1614	0.0081688	1.4469	2.7436	0.56683
untreated-b	3658	3685	3700	2.0915	0.94748	3.065	1.4032	1626	1536	1674	1584	1416	1602	1530	1596	0.0081088	0.0082813	1686	0.0088212	1.6326	3.5218	0.53234
untreated-b	3658	3686	3701	1.6369	0.78397	2.4103	1.2	1638	1542	1686	1596	1416	1620	1530	1614	0.0081688	0.0082813	1710	0.0082825	1.5131	3.0529	0.58688
untreated-b	3686	3701	3722	1.8301	0.81847	2.7175	1.2052	1740	1638	1782	1686	1530	1716	1620	1710	0.0082825	0.0081688	1794	0.0094096	1.5073	3.0778	0.58447
untreated-b	4023	4042	4054	1.5012	0.88467	2.4107	1.1766	1662	1560	1716	1602	1446	1632	1548	1626	0.0078782	0.007273	1746	0.0081213	1.3811	3.0595	0.56772
untreated-b	4023	4043	4055	1.7016	0.91488	2.7942	1.3645	1632	1560	1686	1608	1446	1632	1548	1626	0.0086573	0.007273	1704	0.0093802	1.7016	3.432	0.53721
untreated-b	4023	4042	4056	1.8315	0.88467	2.4773	1.1766	1650	1560	1692	1602	1446	1632	1548	1626	0.0078782	0.007273	1716	0.0071278	1.6391	2.8781	0.58573
untreated-b	4023	4043	4057	1.6385	0.91488	2.4711	1.3645	1632	1560	1680	1608	1446	1632	1548	1626	0.0086573	0.007273	1698	0.0097925	1.6385	3.0535	0.61194
untreated-b	4043	4055	4062	1.716	0.8508	2.2215	1.3971	1704	1632	1746	1686	1548	1710	1632	1704	0.0093802	0.0086573	1782	0.01031	1.5695	3.3732	0.52056
untreated-b	4043	4055	4063	1.716	0.8508	2.9311	1.3971	1704	1632	1752	1686	1548	1710	1632	1704	0.0093802	0.0086573	1764	0.011506	1.7624	3.26	0.58436
untreated-b	4301	4311	4317	1.5696	0.78485	2.4787	1.238	1572	1488	1626	1542	1404	1560	1482	1554	0.0093198	0.0098012	1638	0.008548	1.4409	2.7435	0.51494
untreated-b	4301	4311	4318	1.6998	0.78485	2.6124	1.238	1584	1488	1626	1542	1404	1560	1482	1554	0.0093198	0.0098012	1662	0.0097259	1.3725	3.6871	0.52478
untreated-b	4311	4317	4333	1.6996	0.7848	2.556	1.2393	1674	1572	1728	1626	1482	1644	1560	1638	0.008548	0.0093198	1746	0.0081346	1.3159	3.0008	0.55446
untreated-b	4311	4317	4334	1.6996	0.7848	2.7339	1.2393	1674	1572	1722	1626	1482	1644	1560	1638	0.008548	0.0093198	1746	0.0091747	1.3743	3.3987	0.53157
untreated-b	4311	4318	4342	1.8435	0.84989	2.4842	1.3062	1662	1584	1704	1626	1482	1668	1560	1662	0.0097259	0.0093198	1722	0.010193	1.7653	3.0408	0.51933
untreated-b	4318	4342	4347	1.8323	0.92176	2.8711	1.2421	1734	1662	1776	1704	1560	1728	1668	1722	0.010193	0.0097259	1794	0.0079482	1.5064	2.5494	0.44403
untreated-b	4585	4598	4612	1.8293	0.52264	2.5417	0.85326	1566	1422	1608	1476	1392	1554	1470	1548	0.0094462	0.010106	1632	0.0095522	1.5701	3.3049	0.50706
untreated-b	4598	4612	4633	1.8304	0.91466	3.2644	1.2709	1650	1566	1710	1608	1470	1638	1554	1632	0.0095522	0.0094462	1716	0.0097937	1.7067	3.5584	0.45948
untreated-b	4922	4935	4956	1.4371	0.68598	2.3517	1.2453	1476	1386	1530	1446	1290	1464	1374	1458	0.0097316	0.008793	1542	0.0093943	1.3755	2.7495	0.49114
untreated-b	4922	4935	4957	1.8263	0.68598	2.6782	1.2453	1494	1386	1536	1446	1290	1464	1374	1458	0.0097316	0.008793	1548	0.0091169	1.3742	2.9897	0.55005
untreated-b	4935	4956	4970	1.5079	0.71857	2.6058	1.1759	1560	1476	1626	1530	1374	1548	1464	1542	0.0093943	0.0097316	1644	0.0089563	1.3136	3.1257	0.51194
untreated-b	4935	4956	4971	1.6998	0.71857	2.609	1.1759	1578	1476	1626	1530	1374	1548	1464	1542	0.0093943	0.0097316	1644	0.0087846	1.3092	3.0587	0.54803
untreated-b	4935	4957	4974	1.7665	0.91317	2.8071	1.3391	1572	1494	1626	1536	1374	1554	1464	1548	0.0091169	0.0097316	1632	0.0089721	1.5062	3.0618	0.52889
untreated-b	4957	4974	4987	1.7676	0.88325	2.8685	1.4036	1656	1572	1710	1626	1464	1638	1554	1632	0.0089721	0.0091169	1728	0.009163	1.6439	3.5216	0.46981
untreated-b	4956	4970	4994	1.7048	0.75393	3.0567	1.3029	1668	1560	1728	1626	1464	1650	1548	1644	0.0089563	0.0093943	1734	0.0097898	1.4418	3.2573	0.54892
untreated-b	4956	4971	4995	1.7648	0.84989	2.7478	1.3045	1662	1578	1710	1626	1464	1650	1548	1644	0.0087846	0.0093943	1734	0.0091507	1.6314	3.49	0.51831
untreated-b	4956	4971	4996	1.5694	0.84989	2.5379	1.3045	1668	1578	1722	1626	1464	1650	1548	1644	0.0087846	0.0093943	1734	0.0088909	1.3079	2.8081	0.5259
untreated-b	5946	5955	5965	1.8332	0.75447	2.6839	1.1135	1572	1464	1614	1506	1380	1536	1458	1530	0.0097268	0.0099692	1626	0.009335	1.3848	3.1225	0.55787
untreated-b	5946	5955	5966	1.7691	0.75447	2.5479	1.1135	1560	1464	1602	1506	1380	1536	1458	1530	0.0097268	0.0099692	1620	0.0097682	1.5114	3.2486	0.43673
untreated-b	5955	5965	5981	1.5741	0.91658	2.8092	1.342	1632	1572	1698	1614	1458	1632	1536	1626	0.009335	0.0097268	1710	0.009481	1.5741	3.186	0.53148
untreated-b	6646	6657	6665	1.6339	0.91516	2.5445	1.5683	1686	1614	1734	1668	1536	1680	1602	1674	0.009386	0.011786	1746	0.0097676	1.5698	2.9859	0.51335
untreated-b	6646	6658	6667	1.6363	0.78342	2.4223	1.3056	1698	1614	1746	1662	1536	1686	1602	1680	0.010238	0.011786	1776	0.0087444	1.4416	3.19	0.56328
untreated-b	7019	7027	7039	1.829	0.81775	2.8522	1.5318	1722	1638	1770	1698	1572	1710	1638	1704	0.01044	0.0089237	1782	0.009519	1.6347	3.2567	0.50848
untreated-b	7019	7027	7040	1.7087	0.81775	2.4757	1.5318	1716	1638	1764	1698	1572	1710	1638	1704	0.01044	0.0089237	1782	0.0081769	1.5666	2.9324	0.56962
untreated-b	7020	7028	7043	1.9635	0.88543	3.3126	1.3364	1734	1650	1794	1692	1572	1716	1638	1710	0.0099464	0.0093639	1794	0.0086659	1.7075	3.3126	0.49103
untreated-b	7382	7394	7406	1.5688	0.8185	2.7954	1.3416	1530	1446	1584	1494	1350	1512	1440	1506	0.010458	0.008748	1602	0.010341	1.316	3.4498	0.45198
untreated-b	7394	7406	7425	1.5686	0.78439	2.686	1.3977	1596	1530	1650	1584	1440	1608	1512	1602	0.010341	0.010458	1680	0.0097734	1.7725	3.5652	0.48893
untreated-b	7394	7406	7426	1.5686	0.78439	2.6016	1.3977	1596	1530	1662	1584	1440	1608	1512	1602	0.010341	0.010458	1674	0.0087584	1.6338	2.9177	0.49208
untreated-b	8369	8389	8405	1.5728	0.98128	2.6112	1.5356	1560	1500	1608	1542	1374	1560	1476	1554	0.0099557	0.0078841	1626	0.0098798	1.5728	3.118	0.52254
untreated-b	9422	9438	9458	1.7015	0.88072	2.546	1.3098	1470	1380	1518	1428	1278	1458	1350	1452	0.0083803	0.0095754	1530	0.0088541	1.5677	2.9872	0.5082
untreated-b	9431	9449	9464	1.767	0.82096	2.5461	1.2057	1524	1428	1566	1470	1302	1500	1416	1494	0.0089902	0.0079859	1590	0.00843	1.5733	3.2639	0.52834
untreated-b	9431	9449	9465	1.6987	0.82096	2.6723	1.2057	1518	1428	1578	1470	1302	1500	1416	1494	0.0089902	0.0079859	1584	0.0074723	1.4382	2.739	0.52175
untreated-b	9449	9465	9489	1.7	0.84934	2.6681	1.3361	1608	1518	1656	1578	1416	1590	1500	1584	0.0074723	0.0089902	1662	0.0080855	1.5772	2.8672	0.50703
untreated-b	9449	9464	9491	1.5688	0.88352	2.4205	1.273	1602	1524	1650	1566	1416	1596	1500	1590	0.00843	0.0089902	1668	0.0089058	1.5773	2.9221	0.50087
untreated-b	9465	9489	9506	2.0305	0.85001	2.7952	1.334	1680	1608	1716	1656	1500	1668	1590	1662	0.0080855	0.0074723	1728	0.010749	1.5038	3.1137	0.4619
untreated-b	9464	9491	9508	1.6406	0.78442	2.8636	1.2102	1692	1602	1764	1650	1500	1674	1596	1668	0.0089058	0.00843	1770	0.0082714	1.3136	2.9974	0.58675
untreated-b	9841	9856	9866	1.5071	0.85056	2.4152	1.2712	1530	1458	1584	1506	1332	1524	1440	1518	0.0081038	0.0076084	1596	0.0086603	1.4401	2.7356	0.60706
untreated-b	9841	9856	9867	1.7115	0.85056	2.6166	1.2712	1548	1458	1596	1506	1332	1524	1440	1518	0.0081038	0.0076084	1614	0.0092527	1.3793	3.123	0.62223
untreated-b	9856	9866	9878	1.703	0.75353	2.6644	1.2076	1632	1530	1680	1584	1440	1602	1524	1596	0.0086603	0.0081038	1686	0.0086102	1.4439	2.873	0.57208
untreated-b	9856	9867	9881	1.5734	0.85574	2.5496	1.3083	1626	1548	1674	1596	1440	1620	1524	1614	0.0092527	0.0081038	1692	0.010032	1.5739	3.1889	0.51581
untreated-b	9867	9881	9893	1.6979	0.78668	2.6662	1.2748	1704	1626	1752	1674	1524	1698	1620	1692	0.010032	0.0092527	1770	0.010022	1.6422	3.2528	0.57529
untreated-b	9867	9881	9894	1.4696	0.78668	2.2212	1.2748	1686	1626	1740	1674	1524	1698	1620	1692	0.010032	0.0092527	1764	0.0093644	1.5741	2.8762	0.59229
untreated-b	223	237	250	1.7662	0.82167	2.5484	1.1756	1452	1344	1494	1392	1230	1428	1332	1422	0.0086058	0.0083936	1512	0.0085811	1.5034	3.1252	0.56365
untreated-b	237	250	267	1.7679	0.88308	2.615	1.2742	1530	1452	1572	1494	1332	1518	1428	1512	0.0085811	0.0086058	1596	0.009736	1.6299	3.3134	0.52263
untreated-b	237	250	268	1.7684	0.88308	2.6211	1.2742	1536	1452	1584	1494	1332	1518	1428	1512	0.0085811	0.0086058	1602	0.0083289	1.569	3.1102	0.58062
untreated-b	250	268	289	1.7668	0.88418	2.6789	1.3106	1626	1536	1668	1584	1428	1608	1518	1602	0.0083289	0.0085811	1686	0.0097695	1.5071	3.1897	0.54079
untreated-b	250	268	290	1.9065	0.88418	2.6092	1.3106	1638	1536	1674	1584	1428	1608	1518	1602	0.0083289	0.0085811	1692	0.0086221	1.4999	3.0687	0.60016
untreated-b	268	290	298	1.4421	0.95323	2.2222	1.3046	1704	1638	1752	1674	1518	1698	1608	1692	0.0086221	0.0083289	1776	0.0092598	1.4416	2.8651	0.6308
untreated-b	290	298	310	1.5701	0.72104	2.2246	1.1111	1788	1704	1830	1752	1608	1782	1698	1776	0.0092598	0.0086221	1866	0.0091126	1.4401	3.1251	0.56137
untreated-b	579	593	606	1.7662	0.82167	2.5484	1.1756	1452	1344	1494	1392	1230	1428	1332	1422	0.0086058	0.0083936	1512	0.0085811	1.5034	3.1252	0.56365
untreated-b	593	606	623	1.7679	0.88308	2.615	1.2742	1530	1452	1572	1494	1332	1518	1428	1512	0.0085811	0.0086058	1596	0.009736	1.6299	3.3134	0.52263
untreated-b	593	606	624	1.7684	0.88308	2.6211	1.2742	1536	1452	1584	1494	1332	1518	1428	1512	0.0085811	0.0086058	1602	0.0083289	1.569	3.1102	0.58062
untreated-b	606	624	645	1.7668	0.88418	2.6789	1.3106	1626	1536	1668	1584	1428	1608	1518	1602	0.0083289	0.0085811	1686	0.0097695	1.5071	3.1897	0.54079
untreated-b	606	624	646	1.9065	0.88418	2.6092	1.3106	1638	1536	1674	1584	1428	1608	1518	1602	0.0083289	0.0085811	1692	0.0086221	1.4999	3.0687	0.60016
untreated-b	624	646	654	1.4421	0.95323	2.2222	1.3046	1704	1638	1752	1674	1518	1698	1608	1692	0.0086221	0.0083289	1776	0.0092598	1.4416	2.8651	0.6308
untreated-b	646	654	666	1.5701	0.72104	2.2246	1.1111	1788	1704	1830	1752	1608	1782	1698	1776	0.0092598	0.0086221	1866	0.0091126	1.4401	3.1251	0.56137
untreated-b	1064	1088	1111	1.6356	0.78384	2.6037	1.1142	1872	1788	1920	1830	1698	1866	1788	1860	0.0083317	0.0089202	1932	0.0095749	1.5678	2.8088	0.57632
untreated-b	1064	1088	1112	1.5121	0.78384	2.2846	1.1142	1872	1788	1920	1830	1698	1866	1788	1860	0.0083317	0.0089202	1950	0.0094899	1.4489	3.1874	0.53265
untreated-b	1808	1823	1840	1.763	0.78728	2.413	1.2094	1476	1314	1524	1380	1212	1446	1314	1440	0.0056781	0.0082562	1572	0.0061106	1.6394	3.3206	0.6506
untreated-b	1823	1840	1856	1.6603	0.88149	2.2823	1.2065	1572	1476	1620	1524	1314	1578	1446	1572	0.0061106	0.0056781	1656	0.008489	1.6353	3.1192	0.62903
untreated-b	1823	1840	1857	1.6603	0.88149	2.285	1.2065	1572	1476	1614	1524	1314	1578	1446	1572	0.0061106	0.0056781	1650	0.0084707	1.7671	3.1242	0.62635
untreated-b	1840	1857	1868	1.442	0.83016	2.3519	1.1425	1656	1572	1710	1614	1446	1656	1578	1650	0.0084707	0.0061106	1728	0.0099753	1.442	2.9843	0.57188
untreated-b	1840	1856	1872	1.5679	0.83016	2.2222	1.1411	1662	1572	1704	1620	1446	1662	1578	1656	0.008489	0.0061106	1728	0.0098495	1.5679	2.9338	0.58082
untreated-b	1840	1856	1873	1.4394	0.83016	2.023	1.1411	1662	1572	1704	1620	1446	1662	1578	1656	0.008489	0.0061106	1746	0.0088859	1.4394	3.016	0.6261
untreated-b	1856	1873	1884	1.508	0.71972	2.1622	1.0115	1746	1662	1788	1704	1578	1752	1662	1746	0.0088859	0.008489	1830	0.0098648	1.5043	3.3198	0.54392
untreated-b	2171	2189	2199	1.7633	0.88385	2.7467	1.2731	1680	1596	1728	1638	1482	1662	1578	1656	0.0087641	0.0080281	1734	0.008946	1.5746	2.9411	0.54952
untreated-b	2189	2199	2205	1.8989	0.88165	2.6099	1.3733	1764	1680	1800	1728	1578	1740	1662	1734	0.008946	0.0087641	1824	0.0097029	1.574	3.3887	0.52114
untreated-b	2189	2199	2206	1.5748	0.88165	2.6121	1.3733	1752	1680	1806	1728	1578	1740	1662	1734	0.008946	0.0087641	1824	0.0095512	1.4402	3.1344	0.50263
untreated-b	2199	2205	2222	1.764	0.94943	2.7995	1.3049	1830	1764	1884	1800	1662	1830	1740	1824	0.0097029	0.008946	1908	0.0093677	1.764	3.5646	0.52284
untreated-b	2205	2222	2235	1.6983	0.88199	2.8035	1.3997	1920	1830	1974	1884	1740	1914	1830	1908	0.0093677	0.0097029	1980	0.00906	1.634	2.9831	0.54156
untreated-b	2205	2222	2236	2.0277	0.88199	3.0129	1.3997	1926	1830	1968	1884	1740	1914	1830	1908	0.0093677	0.0097029	1980	0.0089589	1.9014	3.3858	0.60655
untreated-b	2537	2545	2559	1.8931	0.84956	2.9832	1.3414	1728	1638	1782	1686	1536	1710	1626	1704	0.0092634	0.008964	1794	0.0091314	1.5758	3.3932	0.56446
untreated-b	2537	2545	2560	1.8312	0.84956	2.6717	1.3414	1722	1638	1770	1686	1536	1710	1626	1704	0.0092634	0.008964	1788	0.0085962	1.6347	3.2376	0.57497
untreated-b	2537	2546	2562	1.7061	0.84677	2.8676	1.2429	1728	1644	1776	1692	1536	1710	1626	1704	0.0088543	0.008964	1788	0.011184	1.3751	3.3197	0.50809
untreated-b	2545	2560	2569	1.8311	0.91558	2.5376	1.3358	1806	1722	1848	1770	1626	1794	1710	1788	0.0085962	0.0092634	1872	0.0093456	1.5683	3.2524	0.51621
untreated-b	2545	2560	2570	1.8342	0.91558	2.7363	1.3358	1806	1722	1854	1770	1626	1794	1710	1788	0.0085962	0.0092634	1878	0.0090647	1.5715	3.4538	0.53453
untreated-b	2546	2562	2571	1.5745	0.85306	2.7994	1.4338	1794	1728	1848	1776	1626	1794	1710	1788	0.011184	0.0088543	1854	0.010395	1.5745	2.9302	0.5276
untreated-b	2546	2562	2572	1.965	0.85306	2.9968	1.4338	1806	1728	1848	1776	1626	1794	1710	1788	0.011184	0.0088543	1848	0.011108	1.6997	2.9968	0.44767
untreated-b	2545	2559	2574	2.0242	0.94657	3.0523	1.4916	1824	1728	1866	1782	1626	1800	1710	1794	0.0091314	0.0092634	1890	0.0095016	1.7012	3.7682	0.50326
untreated-b	2560	2569	2592	1.8305	0.91553	2.6101	1.2688	1884	1806	1932	1848	1710	1878	1794	1872	0.0093456	0.0085962	1956	0.0090674	1.7019	3.4453	0.54293
untreated-b	2560	2569	2593	1.5757	0.91553	2.5921	1.2688	1884	1806	1938	1848	1710	1878	1794	1872	0.0093456	0.0085962	1962	0.0091922	1.5062	3.2626	0.55808
untreated-b	2560	2570	2594	1.7617	0.91711	2.6035	1.3681	1884	1806	1926	1854	1710	1884	1794	1878	0.0090647	0.0085962	1944	0.0088437	1.7617	3.0632	0.57134
untreated-b	2570	2594	2603	1.6372	0.88083	2.4739	1.3018	1968	1884	2010	1926	1794	1950	1884	1944	0.0088437	0.0090647	2034	0.0092197	1.5156	3.1204	0.52741
untreated-b	2570	2594	2604	1.8317	0.88083	2.8671	1.3018	1962	1884	2010	1926	1794	1950	1884	1944	0.0088437	0.0090647	2022	0.0094506	1.5658	3.1896	0.58271
untreated-b	2939	2953	2962	1.5662	0.95072	2.4198	1.3972	1710	1638	1764	1686	1542	1710	1620	1704	0.0089099	0.0081629	1782	0.0091776	1.5662	3.003	0.53822
untreated-b	2939	2954	2963	1.826	1.0147	3.0619	1.6559	1728	1656	1782	1710	1542	1722	1620	1716	0.008721	0.0081629	1806	0.0094805	1.767	3.8226	0.53059
untreated-b	2939	2954	2964	1.8982	1.0147	3.2348	1.6559	1734	1656	1788	1710	1542	1722	1620	1716	0.008721	0.0081629	1794	0.0097194	1.6996	3.3875	0.50653
untreated-b	2953	2962	2974	1.7065	0.78311	2.5496	1.2099	1806	1710	1854	1764	1620	1788	1710	1782	0.0091776	0.0089099	1878	0.0096895	1.377	3.3239	0.48623
untreated-b	2954	2963	2979	1.9113	0.91299	2.8103	1.531	1806	1728	1866	1782	1620	1812	1722	1806	0.0094805	0.008721	1878	0.0082536	1.832	3.1336	0.51757
untreated-b	2963	2979	2992	1.8351	0.95565	2.8731	1.4051	1896	1806	1950	1866	1722	1884	1812	1878	0.0082536	0.0094805	1968	0.0091992	1.6368	3.5752	0.49859
untreated-b	2977	2987	3005	2.084	0.91477	3.1852	1.3399	1968	1884	2016	1932	1800	1950	1866	1944	0.0087483	0.010467	2022	0.0088318	1.6956	3.3324	0.49464
untreated-b	3247	3258	3283	1.4427	0.84928	2.3498	1.2104	1416	1338	1470	1386	1236	1416	1326	1410	0.0078966	0.0084479	1500	0.0099749	1.4427	3.3014	0.56276
untreated-b	3247	3258	3284	1.573	0.84928	2.3498	1.2104	1416	1338	1464	1386	1236	1416	1326	1410	0.0078966	0.0084479	1482	0.0088624	1.573	2.7457	0.59536
untreated-b	3258	3284	3291	1.6316	0.7865	2.551	1.1749	1512	1416	1560	1464	1326	1488	1416	1482	0.0088624	0.0078966	1578	0.0087061	1.5106	3.0451	0.63187
untreated-b	3258	3284	3292	1.4417	0.7865	2.2794	1.1749	1518	1416	1566	1464	1326	1488	1416	1482	0.0088624	0.0078966	1596	0.0084421	1.3141	2.9858	0.57998
untreated-b	3258	3283	3300	1.506	0.72134	2.4176	1.1749	1506	1416	1554	1470	1326	1506	1416	1500	0.0099749	0.0078966	1572	0.01088	1.506	2.9264	0.58473
untreated-b	3284	3291	3320	1.4421	0.81578	2.2858	1.2755	1584	1512	1638	1560	1416	1584	1488	1578	0.0087061	0.0088624	1668	0.0092989	1.4421	3.013	0.58424
untreated-b	3284	3291	3321	1.635	0.81578	2.5552	1.2755	1584	1512	1638	1560	1416	1584	1488	1578	0.0087061	0.0088624	1656	0.0092067	1.635	3.0509	0.56271
untreated-b	3284	3292	3323	1.4929	0.72085	2.6816	1.1397	1596	1518	1668	1566	1416	1602	1488	1596	0.0084421	0.0088624	1674	0.0085484	1.5116	2.721	0.46364
untreated-b	3291	3320	3336	1.6991	0.72103	2.8614	1.1429	1686	1584	1734	1638	1488	1674	1584	1668	0.0092989	0.0087061	1746	0.010346	1.5755	3.3179	0.50903
untreated-b	3381	3400	3414	1.8927	0.94864	2.9348	1.3606	1980	1902	2028	1944	1824	1974	1902	1968	0.0084799	0.0098728	2040	0.0091487	1.7661	3.2631	0.54774
untreated-b	3733	3743	3757	1.6347	0.85194	2.6042	1.2359	1770	1674	1824	1722	1596	1740	1668	1734	0.0080548	0.0079192	1830	0.0083766	1.3834	2.7965	0.58636
untreated-b	3734	3745	3763	1.6388	0.81656	2.2877	1.1773	1782	1698	1824	1740	1596	1770	1668	1764	0.0087418	0.0096031	1866	0.008802	1.5089	3.3933	0.57064
untreated-b	3743	3757	3776	1.7651	0.81737	2.5928	1.3021	1872	1770	1914	1824	1668	1836	1740	1830	0.0083766	0.0080548	1938	0.0085367	1.3792	3.2064	0.52484
untreated-b	3743	3757	3777	1.6321	0.81737	2.7459	1.3021	1854	1770	1914	1824	1668	1836	1740	1830	0.0083766	0.0080548	1938	0.0085091	1.5172	3.3981	0.56481
untreated-b	3757	3776	3799	1.7059	0.88254	2.3475	1.2964	1950	1872	1992	1914	1740	1944	1836	1938	0.0085367	0.0083766	2022	0.0087293	1.6327	3.1145	0.51979
untreated-b	3757	3776	3800	1.5733	0.88254	2.4306	1.2964	1944	1872	1998	1914	1740	1944	1836	1938	0.0085367	0.0083766	2016	0.0084028	1.5733	2.8843	0.53155
untreated-b	3757	3777	3801	1.8288	0.81606	2.4718	1.3729	1950	1854	1998	1914	1740	1944	1836	1938	0.0085091	0.0083766	2016	0.0073479	1.7013	2.9286	0.5946
untreated-b	4078	4090	4098	1.6994	0.88189	2.7259	1.376	1446	1368	1494	1410	1266	1428	1332	1422	0.0094226	0.009531	1524	0.0091148	1.514	3.5644	0.51371
untreated-b	4078	4089	4102	1.7045	0.9153	2.6753	1.3391	1446	1362	1494	1410	1266	1434	1332	1428	0.008452	0.009531	1512	0.0089634	1.5661	3.1273	0.57208
untreated-b	4078	4089	4103	1.7034	0.9153	2.5416	1.3391	1440	1362	1482	1410	1266	1434	1332	1428	0.008452	0.009531	1506	0.0093015	1.5661	3.0761	0.59369
untreated-b	4089	4103	4116	1.7038	0.85169	2.6591	1.2708	1524	1440	1572	1482	1332	1512	1434	1506	0.0093015	0.008452	1578	0.0094521	1.5039	2.8784	0.56043
untreated-b	4089	4103	4117	1.635	0.85169	2.3475	1.2708	1524	1440	1566	1482	1332	1512	1434	1506	0.0093015	0.008452	1590	0.0091139	1.5087	2.9921	0.57261
untreated-b	4090	4098	4121	1.8993	0.84971	2.7861	1.3629	1536	1446	1578	1494	1332	1530	1428	1524	0.0091148	0.0094226	1602	0.0087509	1.8265	3.3751	0.45492
untreated-b	4103	4116	4129	1.5015	0.8519	2.4774	1.3295	1602	1524	1662	1572	1434	1584	1512	1578	0.0094521	0.0093015	1674	0.0089228	1.3096	2.9201	0.53226
untreated-b	4103	4117	4130	1.7703	0.81748	2.598	1.1737	1614	1524	1656	1566	1434	1596	1512	1590	0.0091139	0.0093015	1686	0.0097102	1.5024	3.5209	0.54866
untreated-b	4103	4117	4131	1.7003	0.81748	2.7337	1.1737	1620	1524	1674	1566	1434	1596	1512	1590	0.0091139	0.0093015	1680	0.0086292	1.3775	2.9265	0.58505
untreated-b	4117	4131	4145	1.7641	0.85017	2.4205	1.3668	1698	1620	1740	1674	1512	1686	1596	1680	0.0086292	0.0091139	1758	0.0086403	1.5696	2.9209	0.58283
untreated-b	4117	4130	4147	1.769	0.88513	2.8667	1.299	1692	1614	1746	1656	1512	1692	1596	1686	0.0097102	0.0091139	1770	0.0085859	1.769	3.5871	0.53937
untreated-b	4117	4130	4148	1.6384	0.88513	2.5454	1.299	1692	1614	1740	1656	1512	1692	1596	1686	0.0097102	0.0091139	1776	0.0089974	1.6384	3.4885	0.5844
untreated-b	4130	4147	4162	1.6913	0.88448	2.7389	1.4333	1764	1692	1818	1746	1596	1776	1692	1770	0.0085859	0.0097102	1836	0.01033	1.834	3.3085	0.56347
untreated-b	4147	4162	4178	1.8354	0.84566	2.9829	1.3694	1848	1764	1896	1818	1692	1842	1776	1836	0.01033	0.0085859	1908	0.010524	1.6967	3.3776	0.52092
untreated-b	4147	4162	4179	1.8301	0.84566	2.9382	1.3694	1854	1764	1908	1818	1692	1842	1776	1836	0.01033	0.0085859	1920	0.0088738	1.7044	3.3076	0.51491
untreated-b	4162	4178	4189	1.6335	0.91769	2.4728	1.4915	1932	1848	1986	1896	1776	1914	1842	1908	0.010524	0.01033	2010	0.0075368	1.702	3.0723	0.54194
untreated-b	4162	4179	4192	1.6979	0.91503	2.5528	1.4691	1926	1854	1974	1908	1776	1926	1842	1920	0.0088738	0.01033	2004	0.0085343	1.6979	3.3702	0.58823
untreated-b	4448	4460	4472	1.8928	0.88255	2.9983	1.3409	1410	1314	1458	1368	1212	1392	1302	1386	0.0087988	0.0084542	1464	0.0092106	1.6356	3.1293	0.56591
untreated-b	4448	4460	4473	1.8991	0.88255	2.7261	1.3409	1416	1314	1458	1368	1212	1392	1302	1386	0.0087988	0.0084542	1482	0.0087706	1.7052	3.4382	0.50259
untreated-b	4460	4473	4492	1.7675	0.94953	3.0006	1.3631	1488	1416	1542	1458	1302	1488	1392	1482	0.0087706	0.0087988	1572	0.0094061	1.7675	3.8303	0.5512
untreated-b	4460	4473	4493	1.6346	0.94953	2.5437	1.3631	1494	1416	1542	1458	1302	1488	1392	1482	0.0087706	0.0087988	1578	0.0088115	1.637	3.4613	0.58676
untreated-b	4473	4493	4502	1.6568	0.81729	2.4864	1.2718	1572	1494	1620	1542	1392	1584	1488	1578	0.0088115	0.0087706	1638	0.0090646	1.7669	3.0033	0.57036
untreated-b	4906	4925	4940	1.7011	0.88676	2.5347	1.3728	1908	1824	1950	1878	1734	1908	1824	1902	0.0086706	0.0090881	1980	0.0087228	1.7011	3.2303	0.5338
untreated-b	4906	4925	4941	1.7103	0.88676	2.6666	1.3728	1908	1824	1962	1878	1734	1908	1824	1902	0.0086706	0.0090881	1986	0.0083336	1.7103	3.2004	0.50978
untreated-b	4906	4927	4942	1.835	0.78532	2.867	1.4639	1914	1824	1962	1884	1734	1914	1824	1908	0.0092448	0.0090881	1980	0.010049	1.835	3.5083	0.44731
untreated-b	4909	4935	4946	1.8307	0.85166	2.7985	1.2382	1974	1872	2022	1920	1752	1938	1860	1932	0.0079576	0.0092816	2034	0.0093621	1.2422	3.2294	0.49753
untreated-b	5261	5274	5295	2.0244	0.94989	3.0566	1.3722	1710	1602	1758	1650	1488	1680	1578	1674	0.0081154	0.0084576	1770	0.0086387	1.6388	3.3907	0.49976
untreated-b	5261	5274	5296	1.8983	0.94989	2.9269	1.3722	1692	1602	1740	1650	1488	1680	1578	1674	0.0081154	0.0084576	1752	0.0089864	1.7689	3.2598	0.54405
untreated-b	5261	5275	5297	1.7025	0.98007	2.5443	1.3415	1704	1614	1752	1656	1488	1680	1578	1674	0.0078437	0.0084576	1758	0.0083795	1.4402	2.8003	0.531
untreated-b	5261	5275	5298	1.9601	0.98007	3.1971	1.3415	1698	1614	1752	1656	1488	1680	1578	1674	0.0078437	0.0084576	1752	0.0087692	1.7699	3.1971	0.55607
untreated-b	5274	5296	5302	2.2223	0.94915	3.1972	1.4635	1782	1692	1830	1740	1578	1758	1680	1752	0.0089864	0.0081154	1842	0.0085215	1.7674	3.6196	0.47739
untreated-b	5275	5298	5304	2.094	0.98004	3.14	1.5986	1782	1698	1830	1752	1578	1758	1680	1752	0.0087692	0.0078437	1842	0.0088557	1.6967	3.6368	0.53439
untreated-b	5275	5297	5306	1.8291	0.85126	2.5503	1.2722	1806	1704	1848	1752	1578	1764	1680	1758	0.0083795	0.0078437	1866	0.0083781	1.3738	3.1258	0.51442
untreated-b	5275	5297	5307	1.9047	0.85126	2.7506	1.2722	1800	1704	1848	1752	1578	1764	1680	1758	0.0083795	0.0078437	1860	0.0078524	1.4447	3.0763	0.53927
untreated-b	5298	5304	5327	1.8971	1.047	2.811	1.57	1854	1782	1896	1830	1680	1848	1758	1842	0.0088557	0.0087692	1914	0.01051	1.8324	3.5764	0.48259
untreated-b	5297	5307	5333	1.8972	0.95236	2.8616	1.3753	1896	1800	1938	1848	1680	1866	1764	1860	0.0078524	0.0083795	1950	0.0087893	1.5031	3.1883	0.51264
untreated-b	5297	5307	5334	1.8273	0.95236	2.473	1.3753	1896	1800	1938	1848	1680	1866	1764	1860	0.0078524	0.0083795	1956	0.007053	1.5721	2.8757	0.5904
untreated-b	5297	5306	5337	1.5689	0.91453	2.5427	1.2751	1878	1806	1932	1848	1680	1872	1764	1866	0.0083781	0.0083795	1944	0.0095695	1.5031	3.0526	0.55094
untreated-b	5297	5306	5338	1.6319	0.91453	2.3545	1.2751	1884	1806	1932	1848	1680	1872	1764	1866	0.0083781	0.0083795	1962	0.0083773	1.5054	3.1787	0.50828
untreated-b	5306	5337	5344	1.773	0.78446	2.8685	1.2713	1962	1878	2010	1932	1764	1950	1872	1944	0.0095695	0.0083781	2028	0.0096683	1.635	3.3879	0.48798
untreated-b	5307	5333	5345	1.8938	0.94858	2.7268	1.4308	1980	1896	2022	1938	1764	1956	1866	1950	0.0087893	0.0078524	2034	0.0080082	1.6414	2.9826	0.54879
untreated-b	5307	5333	5346	1.9004	0.94858	2.6749	1.4308	1980	1896	2016	1938	1764	1956	1866	1950	0.0087893	0.0078524	2034	0.0097446	1.5075	3.2	0.50506
untreated-b	5640	5655	5673	1.7018	0.88528	2.4872	1.2736	1668	1578	1716	1626	1476	1656	1566	1650	0.0084702	0.0092868	1734	0.0074353	1.5746	2.8709	0.54602
untreated-b	5639	5653	5678	2.0293	0.94727	2.8678	1.3098	1692	1602	1734	1644	1476	1668	1566	1662	0.0081588	0.0088159	1758	0.009295	1.637	3.781	0.50362
untreated-b	5639	5654	5681	1.7663	0.75161	2.49	1.2407	1698	1590	1746	1650	1476	1674	1566	1668	0.0079049	0.0088159	1788	0.0081449	1.375	3.5534	0.48513
untreated-b	5639	5654	5682	1.5695	0.75161	2.7302	1.2407	1686	1590	1746	1650	1476	1674	1566	1668	0.0079049	0.0088159	1752	0.0085384	1.4407	2.8586	0.49872
untreated-b	5654	5682	5698	1.7681	0.78475	2.7294	1.3651	1782	1686	1836	1746	1566	1758	1674	1752	0.0085384	0.0079049	1854	0.0080148	1.5062	3.13	0.5692
untreated-b	5682	5698	5722	1.7028	0.88406	2.544	1.3647	1872	1782	1920	1836	1674	1860	1758	1854	0.0080148	0.0085384	1938	0.008943	1.5702	3.0733	0.61061
untreated-b	5698	5722	5733	1.7	0.8514	2.0908	1.272	1950	1872	1974	1920	1758	1944	1860	1938	0.008943	0.0080148	2028	0.0089618	1.6322	3.4538	0.50269
untreated-b	5698	5722	5734	1.5717	0.8514	2.4844	1.272	1950	1872	1992	1920	1758	1944	1860	1938	0.008943	0.0080148	2010	0.0097067	1.4388	3.0592	0.54665
untreated-b	5994	6007	6021	2.3391	0.94677	3.318	1.4049	1674	1584	1716	1626	1488	1650	1578	1644	0.010126	0.010126	1722	0.0092934	1.7646	3.5211	0.48631
untreated-b	6007	6021	6038	2.0213	1.1695	2.9372	1.659	1746	1674	1794	1716	1578	1728	1650	1722	0.0092934	0.010126	1812	0.0081225	1.6989	3.4595	0.47685
untreated-b	6353	6362	6375	1.7724	0.8517	2.5524	1.2341	1740	1656	1788	1698	1548	1716	1632	1710	0.008731	0.0088257	1800	0.0085095	1.3749	2.9696	0.5378
untreated-b	6353	6362	6376	1.7017	0.8517	2.6141	1.2341	1746	1656	1794	1698	1548	1716	1632	1710	0.008731	0.0088257	1812	0.0092079	1.3773	3.2449	0.55205
untreated-b	6356	6367	6380	1.6357	0.88514	2.2239	1.3732	1758	1668	1800	1722	1560	1740	1650	1734	0.0087424	0.0082701	1830	0.0092171	1.3724	3.1314	0.60908
untreated-b	6356	6367	6381	1.506	0.88514	2.3412	1.3732	1752	1668	1806	1722	1560	1740	1650	1734	0.0087424	0.0082701	1824	0.0081319	1.3772	2.6724	0.58685
untreated-b	6362	6375	6387	1.7693	0.8862	2.7286	1.2762	1818	1740	1860	1788	1632	1806	1716	1800	0.0085095	0.008731	1872	0.0096195	1.6423	2.9295	0.47103
untreated-b	6367	6381	6392	1.4441	0.75302	2.5492	1.1706	1842	1752	1896	1806	1650	1830	1740	1824	0.0081319	0.0087424	1914	0.0098265	1.3738	2.9992	0.59747
untreated-b	6367	6381	6393	1.4411	0.75302	2.3434	1.1706	1848	1752	1896	1806	1650	1830	1740	1824	0.0081319	0.0087424	1914	0.0089502	1.3122	2.7864	0.56266
untreated-b	6381	6393	6413	1.5075	0.72056	2.5497	1.1717	1926	1848	1986	1896	1740	1920	1830	1914	0.0089502	0.0081319	2004	0.0095329	1.4397	3.1895	0.53869
untreated-b	6745	6760	6776	1.6437	0.81567	2.6076	1.3667	1794	1710	1842	1764	1602	1788	1698	1782	0.0092925	0.0089693	1866	0.0098765	1.5725	3.3221	0.47663
untreated-b	6745	6761	6777	1.7431	0.88315	2.9964	1.345	1788	1716	1848	1764	1602	1794	1698	1788	0.0093328	0.0089693	1848	0.0098656	1.7704	2.9964	0.47692
untreated-b	6745	6761	6778	1.7431	0.88315	2.5464	1.345	1788	1716	1842	1764	1602	1794	1698	1788	0.0093328	0.0089693	1854	0.0094554	1.6379	2.8814	0.50237
untreated-b	6761	6777	6784	1.6976	0.87157	2.4814	1.4982	1878	1788	1920	1848	1698	1854	1794	1848	0.0098656	0.0093328	1938	0.0089062	1.5745	3.1804	0.56178
untreated-b	6761	6778	6785	1.7722	0.87157	2.5544	1.2732	1884	1788	1932	1842	1698	1860	1794	1854	0.0094554	0.0093328	1962	0.0080718	1.4431	3.3708	0.51191
untreated-b	6761	6778	6786	1.7059	0.87157	2.7474	1.2732	1884	1788	1938	1842	1698	1860	1794	1854	0.0094554	0.0093328	1944	0.0086864	1.5136	2.9178	0.5512
untreated-b	6777	6784	6799	1.6343	0.84882	2.4742	1.2407	1968	1878	2010	1920	1794	1944	1854	1938	0.0089062	0.0098656	2028	0.0093528	1.3734	2.9308	0.48748
untreated-b	6778	6786	6800	1.8271	0.85296	2.7316	1.3737	1974	1884	2016	1938	1794	1950	1860	1944	0.0086864	0.0094554	2034	0.0085095	1.633	3.1882	0.4818
untreated-b	6778	6786	6801	1.3736	0.85296	2.3404	1.3737	1962	1884	2016	1938	1794	1950	1860	1944	0.0086864	0.0094554	2028	0.008644	1.3793	2.5472	0.46662
untreated-b	6778	6785	6806	1.7635	0.8861	2.9188	1.2772	1974	1884	2028	1932	1794	1968	1860	1962	0.0080718	0.0094554	2034	0.0089354	1.7018	3.0663	0.50491
untreated-b	7062	7079	7093	2.031	0.91427	3.6332	1.4601	1398	1314	1452	1362	1212	1386	1296	1380	0.010101	0.0090575	1452	0.010361	1.8294	3.6332	0.46917
untreated-b	7062	7079	7094	1.9645	0.91427	2.9318	1.4601	1398	1314	1440	1362	1212	1386	1296	1380	0.010101	0.0090575	1458	0.0098007	1.7666	3.5187	0.48761
untreated-b	7079	7094	7101	1.8282	0.98223	3.0557	1.4659	1476	1398	1524	1440	1296	1464	1386	1458	0.0098007	0.010101	1536	0.010394	1.6971	3.4595	0.50862
untreated-b	7079	7094	7102	1.9646	0.98223	2.8039	1.4659	1470	1398	1512	1440	1296	1464	1386	1458	0.0098007	0.010101	1542	0.0095366	1.772	3.8175	0.48605
untreated-b	7440	7455	7465	1.4399	0.78605	2.2828	1.2115	1398	1308	1452	1362	1206	1398	1308	1392	0.0078943	0.0081143	1470	0.0088602	1.4399	2.7318	0.48501
untreated-b	7440	7455	7466	1.5046	0.78605	2.2848	1.2115	1398	1308	1446	1362	1206	1398	1308	1392	0.0078943	0.0081143	1470	0.008861	1.5046	2.9454	0.52394
untreated-b	7441	7453	7473	1.8905	0.85331	3.1221	1.1778	1422	1338	1476	1380	1206	1410	1308	1404	0.0092952	0.008427	1482	0.0094206	1.6965	3.4302	0.52063
untreated-b	7441	7453	7474	1.5751	0.85331	2.8109	1.1778	1422	1338	1488	1380	1206	1410	1308	1404	0.0092952	0.008427	1494	0.0091991	1.4495	3.058	0.51862
untreated-b	7455	7465	7480	1.4382	0.71995	2.4781	1.1414	1494	1398	1548	1452	1308	1476	1398	1470	0.0088602	0.0078943	1566	0.0089027	1.245	2.8697	0.49081
untreated-b	7453	7474	7485	1.7029	0.78753	2.8641	1.4055	1518	1422	1566	1488	1308	1500	1410	1494	0.0091991	0.0092952	1572	0.010291	1.5058	3.0592	0.4721
untreated-b	7453	7474	7486	1.9612	0.78753	3.1195	1.4055	1536	1422	1584	1488	1308	1500	1410	1494	0.0091991	0.0092952	1596	0.0093493	1.4482	3.52	0.49365
untreated-b	7465	7480	7491	1.8297	0.71912	2.7231	1.239	1602	1494	1644	1548	1398	1572	1476	1566	0.0089027	0.0088602	1656	0.0088374	1.3779	2.9963	0.44731
untreated-b	7474	7486	7502	1.634	0.98059	2.5446	1.5598	1602	1536	1650	1584	1410	1602	1500	1596	0.0093493	0.0091991	1674	0.010058	1.634	3.3224	0.47864
untreated-b	7533	7546	7562	1.8363	0.88136	2.5414	1.3391	1956	1872	1998	1914	1764	1938	1842	1932	0.0087296	0.0084518	2022	0.0087616	1.5714	3.3027	0.54937
untreated-b	7533	7545	7564	2.1491	0.94489	2.5446	1.4341	1998	1878	2022	1932	1764	1944	1842	1938	0.0084269	0.0084518	2040	0.0082581	1.3775	3.1023	0.48953
untreated-b	7896	7903	7916	1.9646	0.95037	2.9243	1.4035	1680	1590	1722	1632	1482	1644	1560	1638	0.0094683	0.0087474	1740	0.0094042	1.4428	3.5002	0.50517
untreated-b	7903	7916	7931	2.0244	0.98232	2.7996	1.4622	1764	1680	1806	1722	1560	1746	1644	1740	0.0094042	0.0094683	1824	0.0086387	1.703	3.3062	0.45883
untreated-b	7916	7931	7946	1.9654	1.0122	2.9867	1.3998	1848	1764	1896	1806	1644	1830	1746	1824	0.0086387	0.0094042	1914	0.0082624	1.7681	3.4492	0.49315
untreated-b	7916	7931	7948	2.0278	1.0122	2.8622	1.3998	1848	1764	1896	1806	1644	1830	1746	1824	0.0086387	0.0094042	1920	0.0086981	1.7038	3.7605	0.46256
untreated-b	7931	7946	7964	1.9663	0.98269	2.7439	1.4933	1938	1848	1986	1896	1746	1920	1830	1914	0.0082624	0.0086387	2010	0.0074753	1.6975	3.3801	0.52126
untreated-b	7931	7946	7965	1.9007	0.98269	3.429	1.4933	1932	1848	1998	1896	1746	1920	1830	1914	0.0082624	0.0086387	2004	0.0086278	1.7664	3.5836	0.52599
untreated-b	7931	7948	7969	1.8802	1.0139	3.1116	1.4311	1920	1848	1974	1896	1746	1926	1830	1920	0.0086981	0.0086387	1986	0.0084803	2.0329	3.324	0.43647
untreated-b	8266	8289	8305	1.5334	0.91536	2.3566	1.3992	1434	1368	1494	1422	1248	1440	1344	1434	0.0078927	0.0082256	1524	0.0086569	1.5063	3.0537	0.56546
untreated-b	8266	8289	8306	1.64	0.91536	2.3569	1.3992	1446	1368	1494	1422	1248	1440	1344	1434	0.0078927	0.0082256	1506	0.0094795	1.5034	2.8478	0.53661
untreated-b	8289	8306	8321	1.4414	0.82	2.156	1.1785	1518	1446	1566	1494	1344	1512	1440	1506	0.0094795	0.0078927	1596	0.0090286	1.3762	2.8749	0.57043
untreated-b	8289	8305	8324	1.5268	0.7667	2.4095	1.1783	1524	1434	1578	1494	1344	1530	1440	1524	0.0086569	0.0078927	1596	0.0089239	1.573	2.9383	0.55255
untreated-b	8305	8324	8340	1.5753	0.76342	2.4103	1.2048	1608	1524	1644	1578	1440	1602	1530	1596	0.0089239	0.0086569	1668	0.011539	1.5086	3.1376	0.52374
untreated-b	8305	8324	8341	1.5097	0.76342	2.1472	1.2048	1608	1524	1650	1578	1440	1602	1530	1596	0.0089239	0.0086569	1674	0.0089062	1.3741	2.6175	0.57358
untreated-b	8306	8321	8343	1.6367	0.7207	2.4787	1.078	1614	1518	1656	1566	1440	1602	1512	1596	0.0090286	0.0094795	1674	0.010574	1.4415	3.004	0.52572
untreated-b	8324	8341	8365	1.3134	0.75486	1.9576	1.0736	1686	1608	1734	1650	1530	1680	1602	1674	0.0089062	0.0089239	1752	0.0090092	1.3154	2.4807	0.60784
untreated-b	8324	8341	8366	1.5099	0.75486	2.3488	1.0736	1686	1608	1740	1650	1530	1680	1602	1674	0.0089062	0.0089239	1758	0.0089127	1.3793	2.7439	0.52785
untreated-b	8321	8343	8367	1.771	0.81833	2.6106	1.2394	1692	1614	1740	1656	1512	1680	1602	1674	0.010574	0.0090286	1758	0.0099409	1.4443	3.2529	0.41107
untreated-b	8341	8365	8376	1.3816	0.65669	2.166	0.97879	1776	1686	1824	1734	1602	1758	1680	1752	0.0090092	0.0089062	1842	0.010365	1.197	2.6134	0.54604
untreated-b	8341	8365	8377	1.3752	0.65669	2.2086	0.97879	1776	1686	1824	1734	1602	1758	1680	1752	0.0090092	0.0089062	1842	0.009519	1.2442	2.6685	0.5925
untreated-b	8341	8366	8381	1.5056	0.75497	2.483	1.1744	1782	1686	1830	1740	1602	1764	1680	1758	0.0089127	0.0089062	1848	0.0093017	1.5128	2.9232	0.49921
untreated-b	8341	8366	8382	1.5117	0.75497	2.4235	1.1744	1776	1686	1824	1740	1602	1764	1680	1758	0.0089127	0.0089062	1836	0.010228	1.4481	2.8075	0.47091
untreated-b	8365	8377	8404	1.3766	0.68762	2.1567	1.1043	1848	1776	1896	1824	1680	1848	1758	1842	0.009519	0.0090092	1914	0.012003	1.3766	2.8598	0.54231
untreated-b	8365	8377	8405	1.3795	0.68762	2.2834	1.1043	1848	1776	1902	1824	1680	1848	1758	1842	0.009519	0.0090092	1914	0.010224	1.3795	2.542	0.54419
untreated-b	8366	8381	8408	1.5132	0.75282	2.2108	1.2415	1860	1782	1902	1830	1680	1854	1764	1848	0.0093017	0.0089127	1926	0.010254	1.3748	2.7988	0.49604
untreated-b	8366	8381	8409	1.4616	0.75282	2.8778	1.2415	1848	1782	1914	1830	1680	1854	1764	1848	0.0093017	0.0089127	1920	0.010261	1.5677	2.9338	0.52377
untreated-b	8377	8405	8427	1.4448	0.68974	2.4744	1.1417	1932	1848	1986	1902	1758	1920	1848	1914	0.010224	0.009519	1998	0.010793	1.2476	2.8806	0.48211
untreated-b	8377	8405	8428	1.5071	0.68974	2.4871	1.1417	1938	1848	1992	1902	1758	1920	1848	1914	0.010224	0.009519	2010	0.0094209	1.3822	2.9368	0.4624
untreated-b	8983	9002	9027	1.4381	0.82562	2.4201	1.1759	1860	1770	1908	1824	1698	1860	1776	1854	0.0093236	0.010369	1932	0.009765	1.4381	2.9269	0.50543
untreated-b	8990	9014	9039	1.696	0.91442	2.6636	1.3663	1896	1818	1950	1866	1716	1890	1812	1884	0.0090022	0.0083989	1974	0.008207	1.6364	3.2491	0.54614
untreated-b	8990	9014	9040	1.8376	0.91442	2.5315	1.3663	1908	1818	1950	1866	1716	1890	1812	1884	0.0090022	0.0083989	1974	0.0082462	1.6393	3.1855	0.57424
untreated-b	8990	9015	9041	2.0899	0.78762	2.9998	1.2397	1926	1812	1974	1866	1716	1890	1812	1884	0.0087804	0.0083989	1986	0.0082762	1.502	3.3781	0.54332
untreated-b	9014	9040	9055	1.7659	0.9188	2.7397	1.2658	1986	1908	2034	1950	1812	1980	1890	1974	0.0082462	0.0090022	2040	0.0094772	1.7013	2.9364	0.57149
untreated-b	9523	9554	9574	1.6334	0.81793	2.5449	1.2371	1470	1386	1518	1428	1278	1458	1362	1452	0.0080777	0.0082515	1536	0.0094539	1.375	2.9869	0.50336
untreated-b	9525	9557	9577	1.4376	0.88117	2.1555	1.2391	1476	1398	1524	1440	1278	1464	1374	1458	0.0087588	0.0083588	1548	0.0082088	1.3768	2.6835	0.47325
untreated-b	9525	9557	9578	1.7681	0.88117	2.7995	1.2391	1482	1398	1530	1440	1278	1464	1374	1458	0.0087588	0.0083588	1548	0.010287	1.5038	3.3219	0.43408
untreated-b	9648	9656	9677	1.5033	0.75551	2.5366	1.3351	1920	1836	1968	1896	1746	1902	1824	1896	0.009234	0.008251	1992	0.0096886	1.243	3.1218	0.49744
untreated-b	9648	9657	9681	1.6357	0.7548	2.3469	1.508	1950	1836	1992	1908	1746	1914	1824	1908	0.0096422	0.008251	2004	0.0083039	1.3083	2.7277	0.42104
untreated-b	10048	10053	10061	1.9641	0.91369	2.9358	1.4325	1716	1638	1758	1680	1548	1692	1620	1686	0.01028	0.010263	1776	0.0096006	1.63	3.5129	0.51681
untreated-b	10048	10053	10062	1.6355	0.91369	2.8717	1.4325	1704	1638	1764	1680	1548	1692	1620	1686	0.01028	0.010263	1782	0.0094092	1.4428	3.4491	0.49098
untreated-b	10048	10054	10067	1.5942	0.81704	2.737	1.3114	1716	1638	1770	1692	1548	1734	1620	1728	0.0087363	0.010263	1806	0.0089114	1.8943	3.6407	0.52489
untreated-b	10053	10061	10072	1.7009	0.98207	2.6102	1.4679	1782	1716	1830	1758	1620	1782	1692	1776	0.0096006	0.01028	1860	0.0092483	1.7009	3.5074	0.47761
untreated-b	10053	10062	10073	1.7245	0.81774	2.8707	1.4358	1782	1704	1836	1764	1620	1788	1692	1782	0.0094092	0.01028	1848	0.0097703	1.8926	3.317	0.47603
untreated-b	10053	10062	10074	1.7245	0.81774	2.4257	1.4358	1782	1704	1836	1764	1620	1788	1692	1782	0.0094092	0.01028	1860	0.0093116	1.5693	3.0557	0.51867
untreated-b	10062	10073	10081	1.5784	0.86227	2.4735	1.4353	1854	1782	1902	1836	1692	1854	1788	1848	0.0097703	0.0094092	1920	0.0091577	1.5784	2.9861	0.45917
untreated-b	10061	10072	10083	1.7007	0.85043	3.0543	1.3051	1866	1782	1920	1830	1692	1866	1782	1860	0.0092483	0.0096006	1932	0.010479	1.7007	3.381	0.47211
untreated-b	10061	10072	10084	1.7677	0.85043	2.8689	1.3051	1866	1782	1920	1830	1692	1866	1782	1860	0.0092483	0.0096006	1926	0.0092097	1.7677	3.05	0.45559
untreated-b	10073	10081	10091	1.9016	0.78921	2.796	1.2368	1956	1854	2004	1902	1788	1926	1854	1920	0.0091577	0.0097703	2010	0.0078174	1.5716	2.9772	0.52535
untreated-b	10072	10084	10093	1.6427	0.88386	2.4168	1.4345	1944	1866	1992	1920	1782	1932	1866	1926	0.0092097	0.0092483	2016	0.0088429	1.5082	3.0657	0.48345
untreated-b	10072	10084	10094	1.6406	0.88386	2.5975	1.4345	1944	1866	1992	1920	1782	1932	1866	1926	0.0092097	0.0092483	2010	0.0095408	1.5725	3.1787	0.48276
untreated-b	10448	10463	10473	1.5698	0.8652	2.5367	1.3718	1374	1290	1422	1344	1218	1362	1302	1356	0.010503	0.0094409	1434	0.0091863	1.4453	2.7359	0.52837
untreated-b	10448	10463	10475	1.7661	0.8652	2.8667	1.3718	1368	1290	1416	1344	1218	1362	1302	1356	0.010503	0.0094409	1428	0.010011	1.7016	3.2624	0.48282
untreated-b	10447	10466	10481	1.7027	0.88206	2.7328	1.4323	1404	1320	1458	1368	1218	1386	1314	1380	0.0096805	0.0090011	1458	0.0083948	1.5093	2.7328	0.39679
untreated-b	10463	10475	10484	1.6377	0.88305	2.4156	1.4333	1434	1368	1476	1416	1302	1434	1362	1428	0.010011	0.010503	1494	0.0095919	1.6377	2.9234	0.54972
untreated-b	10463	10475	10485	1.6368	0.88305	2.547	1.4333	1434	1368	1482	1416	1302	1434	1362	1428	0.010011	0.010503	1494	0.0092158	1.6368	2.8094	0.51277
untreated-b	10463	10473	10488	1.3719	0.78491	2.2917	1.2683	1446	1374	1494	1422	1302	1440	1362	1434	0.0091863	0.010503	1506	0.010418	1.3774	2.6786	0.47605
untreated-b	10463	10473	10489	1.504	0.78491	2.4862	1.2683	1446	1374	1494	1422	1302	1440	1362	1434	0.0091863	0.010503	1512	0.0096664	1.5012	3.0048	0.48718
untreated-b	10475	10484	10496	1.5718	0.81887	2.2218	1.2078	1512	1434	1554	1476	1362	1500	1434	1494	0.0095919	0.010011	1578	0.0091788	1.4396	2.7987	0.50192
untreated-b	10475	10484	10497	1.7071	0.81887	2.7314	1.2078	1512	1434	1560	1476	1362	1500	1434	1494	0.0095919	0.010011	1572	0.0098287	1.5083	2.998	0.5002
untreated-b	10475	10485	10498	1.767	0.8184	2.6755	1.2735	1524	1434	1572	1482	1362	1500	1434	1494	0.0092158	0.010011	1584	0.0094155	1.4434	3.1183	0.461
untreated-b	10473	10489	10502	1.6404	0.75199	2.6622	1.2431	1530	1446	1578	1494	1362	1518	1440	1512	0.0096664	0.0091863	1596	0.0099626	1.4417	3.1264	0.40039
untreated-b	10473	10489	10503	1.5685	0.75199	2.5365	1.2431	1524	1446	1572	1494	1362	1518	1440	1512	0.0096664	0.0091863	1584	0.0098117	1.5748	2.9424	0.50025
untreated-b	10484	10497	10510	1.7667	0.85354	2.4859	1.3657	1590	1512	1632	1560	1434	1578	1500	1572	0.0098287	0.0095919	1650	0.0092259	1.5075	2.9976	0.5599
untreated-b	10484	10497	10511	1.7668	0.85354	2.6062	1.3657	1590	1512	1638	1560	1434	1578	1500	1572	0.0098287	0.0095919	1656	0.0084579	1.6405	3.1339	0.43625
untreated-b	10484	10496	10513	1.5671	0.78588	2.8012	1.1109	1596	1512	1662	1554	1434	1584	1500	1578	0.0091788	0.0095919	1662	0.008273	1.5135	2.8012	0.54422
untreated-b	10484	10496	10514	1.3104	0.78588	2.2907	1.1109	1584	1512	1644	1554	1434	1584	1500	1578	0.0091788	0.0095919	1662	0.0097427	1.3104	2.7455	0.52059
untreated-b	10489	10503	10516	1.509	0.78424	2.4064	1.2683	1590	1524	1644	1572	1440	1590	1518	1584	0.0098117	0.0096664	1656	0.0091368	1.509	2.7419	0.42729
untreated-b	10489	10503	10517	1.3756	0.78424	2.6109	1.2683	1590	1524	1650	1572	1440	1590	1518	1584	0.0098117	0.0096664	1668	0.0098695	1.3756	3.2493	0.49164
untreated-b	10497	10510	10527	1.5042	0.88337	2.1502	1.2429	1662	1590	1704	1632	1500	1656	1578	1650	0.0092259	0.0098287	1728	0.0090404	1.4437	2.7338	0.4861
untreated-b	10497	10510	10528	1.636	0.88337	2.4573	1.2429	1662	1590	1722	1632	1500	1656	1578	1650	0.0092259	0.0098287	1722	0.0083319	1.5759	2.4573	0.4934
untreated-b	10496	10513	10535	1.7775	0.78353	2.6159	1.4006	1692	1596	1740	1662	1500	1668	1584	1662	0.008273	0.0091788	1752	0.0086777	1.4393	3.0733	0.50206
untreated-b	10496	10513	10536	1.5688	0.78353	2.3485	1.4006	1686	1596	1734	1662	1500	1668	1584	1662	0.008273	0.0091788	1758	0.0084831	1.3072	2.8066	0.54192
untreated-b	10496	10514	10538	1.3771	0.65522	2.2843	1.1454	1668	1584	1722	1644	1500	1668	1584	1662	0.0097427	0.0091788	1746	0.0096981	1.3771	2.8759	0.52327
untreated-b	10496	10514	10539	1.3108	0.65522	2.0892	1.1454	1668	1584	1716	1644	1500	1668	1584	1662	0.0097427	0.0091788	1752	0.010237	1.3108	2.9953	0.5088
untreated-b	10514	10538	10552	1.5702	0.68856	2.2233	1.1421	1758	1668	1800	1722	1584	1752	1668	1746	0.0096981	0.0097427	1830	0.0097054	1.5174	3.1321	0.48919
untreated-b	10514	10538	10553	1.3728	0.68856	2.4111	1.1421	1758	1668	1812	1722	1584	1752	1668	1746	0.0096981	0.0097427	1830	0.0099183	1.3806	2.8755	0.50613
untreated-b	10513	10535	10555	1.5098	0.88876	2.5504	1.308	1764	1692	1818	1740	1584	1758	1668	1752	0.0086777	0.008273	1836	0.0096065	1.4426	3.063	0.42723
untreated-b	10514	10539	10556	1.6418	0.65538	2.803	1.0446	1764	1668	1818	1716	1584	1758	1668	1752	0.010237	0.0097427	1824	0.010192	1.5077	2.9342	0.44909
untreated-b	10513	10536	10558	1.5713	0.7844	2.3511	1.1743	1776	1686	1818	1734	1584	1764	1668	1758	0.0084831	0.008273	1842	0.0096026	1.4489	3.0028	0.59959
untreated-b	10538	10552	10571	1.6364	0.78509	2.6816	1.1117	1842	1758	1896	1800	1668	1836	1752	1830	0.0097054	0.0096981	1914	0.009939	1.507	3.3269	0.47459
untreated-b	10535	10555	10578	1.7646	0.75491	2.6184	1.2752	1860	1764	1908	1818	1668	1842	1758	1836	0.0096065	0.0086777	1914	0.0089623	1.3134	2.714	0.39683
untreated-b	10536	10558	10580	1.7004	0.78563	2.3636	1.1755	1866	1776	1902	1818	1668	1848	1764	1842	0.0096026	0.0084831	1914	0.0088856	1.5701	2.7442	0.56723
untreated-b	10555	10578	10593	1.5732	0.8823	2.3582	1.3092	1950	1860	1992	1908	1758	1920	1842	1914	0.0089623	0.0096065	2010	0.0090881	1.246	2.663	0.49764
untreated-b	10558	10580	10594	1.7026	0.85019	2.5466	1.1818	1944	1866	1986	1902	1764	1920	1848	1914	0.0088856	0.0096026	2016	0.0091414	1.3822	3.3159	0.50269
untreated-b	10940	10960	10976	2.0227	0.94695	2.8704	1.4638	1596	1512	1638	1560	1380	1578	1470	1572	0.0082601	0.0086565	1650	0.0089117	1.7044	3.2493	0.55987
untreated-b	10960	10976	10989	1.7634	1.0113	2.6813	1.4352	1674	1596	1716	1638	1470	1656	1578	1650	0.0089117	0.0082601	1728	0.0093701	1.6354	3.1223	0.51981
untreated-b	10969	10983	10997	1.4406	0.73217	2.6705	1.2699	1710	1626	1764	1686	1542	1704	1638	1698	0.011038	0.0092496	1770	0.010556	1.4396	2.8098	0.53127
untreated-b	10983	10997	11014	1.8258	0.72028	2.7209	1.3352	1794	1710	1836	1764	1638	1776	1704	1770	0.010556	0.011038	1854	0.0098379	1.5694	3.3646	0.47192
untreated-b	10997	11014	11036	1.5755	0.91291	2.7305	1.3604	1860	1794	1914	1836	1704	1860	1776	1854	0.0098379	0.010556	1920	0.010283	1.5755	2.9904	0.51972
untreated-b	10997	11014	11037	1.7046	0.91291	2.6752	1.3604	1860	1794	1908	1836	1704	1860	1776	1854	0.0098379	0.010556	1926	0.0096443	1.7046	3.2615	0.4891
untreated-b	11014	11037	11057	1.7732	0.85228	2.5448	1.3376	1944	1860	1992	1908	1776	1932	1860	1926	0.0096443	0.0098379	2010	0.0083018	1.5719	3.0062	0.54661
untreated-b	11014	11037	11058	1.5121	0.85228	2.2846	1.3376	1938	1860	1992	1908	1776	1932	1860	1926	0.0096443	0.0098379	2004	0.0086791	1.6332	2.6785	0.49512
untreated-b	11396	11416	11431	1.6338	0.88381	2.419	1.3392	1698	1614	1740	1668	1518	1692	1602	1686	0.0088718	0.0090418	1770	0.0098272	1.6322	3.3228	0.52151
untreated-b	11424	11441	11456	1.9625	0.98056	2.9352	1.3422	1872	1788	1920	1830	1674	1848	1770	1842	0.0084961	0.009753	1944	0.0082378	1.7664	3.6278	0.51949
untreated-b	11424	11441	11457	2.0255	0.98056	2.7451	1.3422	1890	1788	1932	1830	1674	1848	1770	1842	0.0084961	0.009753	1950	0.0080028	1.5048	3.3257	0.55571
untreated-b	603	627	633	1.5055	0.68332	2.2812	1.1128	1458	1338	1506	1404	1254	1434	1368	1428	0.0082885	0.0086642	1530	0.0079066	1.3161	2.7457	0.56746
untreated-b	603	627	634	1.4423	0.68332	2.085	1.1128	1446	1338	1494	1404	1254	1434	1368	1428	0.0082885	0.0086642	1524	0.0074826	1.4449	2.7267	0.52658
untreated-b	603	628	635	1.6363	0.68332	2.1585	0.98023	1464	1338	1506	1386	1254	1434	1368	1428	0.0076223	0.0086642	1542	0.0076242	1.3159	3.0027	0.5862
untreated-b	604	625	638	1.8343	0.88174	2.6684	1.2393	1440	1362	1488	1404	1254	1434	1362	1428	0.0091185	0.0077763	1500	0.0091201	1.635	3.0543	0.54674
untreated-b	1485	1492	1510	1.6363	0.81554	2.4878	1.3025	1398	1320	1446	1368	1242	1392	1314	1386	0.009903	0.0084759	1464	0.0090546	1.6344	3.0612	0.58159
untreated-b	1486	1493	1512	1.8341	0.94642	2.7995	1.2763	1410	1326	1458	1368	1242	1404	1314	1398	0.008304	0.0091982	1476	0.0095329	1.6968	3.3777	0.56959
untreated-b	1492	1510	1530	1.8993	0.81813	2.5451	1.2439	1488	1398	1524	1446	1314	1470	1392	1464	0.0090546	0.009903	1530	0.0082629	1.6366	2.6764	0.63201
untreated-b	2051	2063	2079	1.7654	0.88306	2.6776	1.4057	1470	1386	1530	1446	1260	1458	1356	1452	0.0081408	0.0081267	1548	0.0078998	1.6346	3.2521	0.45874
untreated-b	2847	2863	2880	1.5744	0.72027	2.7433	1.142	1452	1344	1518	1392	1254	1422	1332	1416	0.0090543	0.0089788	1524	0.0076222	1.514	2.93	0.50495
untreated-b	2846	2872	2881	1.5025	0.75313	2.4792	1.2407	1434	1356	1494	1410	1254	1428	1344	1422	0.0094928	0.0082241	1518	0.0083922	1.4391	3.0695	0.54438
untreated-b	2846	2872	2882	1.5653	0.75313	2.3579	1.2407	1440	1356	1482	1410	1254	1428	1344	1422	0.0094928	0.0082241	1506	0.010651	1.3116	3.0727	0.50906
untreated-b	2872	2882	2898	1.6307	0.78265	2.7439	1.179	1512	1440	1566	1482	1344	1512	1428	1506	0.010651	0.0094928	1578	0.010205	1.6307	3.1336	0.55642
untreated-b	3252	3274	3285	1.2762	0.75402	2.621	1.1081	1392	1320	1446	1368	1212	1398	1308	1392	0.0081281	0.0077369	1470	0.010264	1.3738	3.195	0.47333
untreated-b	3955	3962	3975	1.698	0.85225	2.6111	1.2094	1488	1404	1536	1446	1308	1464	1386	1458	0.0092265	0.0087882	1548	0.0087745	1.5107	3.0637	0.52853
untreated-b	3955	3963	3985	1.3799	0.7236	1.9584	1.2709	1494	1404	1542	1464	1308	1476	1386	1470	0.008855	0.0087882	1572	0.0083856	1.2565	2.6769	0.57519
untreated-b	6059	6065	6091	1.7089	0.81788	2.335	1.5913	1410	1320	1452	1392	1212	1398	1296	1392	0.0088115	0.008106	1470	0.0090243	1.5117	2.8575	0.40826
untreated-b	6365	6379	6402	1.4372	0.88373	2.2912	1.3681	1422	1344	1470	1398	1254	1416	1338	1410	0.0089724	0.0083254	1494	0.009262	1.3765	2.8714	0.56703
untreated-b	6380	6399	6424	1.8946	0.81883	3.1893	1.2035	1536	1434	1596	1482	1338	1512	1410	1506	0.008908	0.0071006	1596	0.0088621	1.5674	3.1893	0.46981
untreated-b	6727	6753	6767	1.6316	0.71991	2.3418	1.3088	1476	1380	1524	1446	1272	1452	1368	1446	0.0093905	0.0082777	1542	0.0080725	1.4489	2.8649	0.37647
untreated-b	7141	7172	7188	1.6989	0.75148	2.2842	1.1815	1434	1326	1470	1386	1230	1398	1314	1392	0.0077774	0.0088967	1488	0.0086118	1.2452	2.7914	0.51411
untreated-b	7141	7173	7197	1.4093	0.82002	2.3436	1.203	1410	1344	1482	1392	1230	1422	1314	1416	0.007968	0.0088967	1494	0.0088666	1.375	2.6217	0.52897
untreated-b	7172	7188	7218	1.8334	0.84943	2.7934	1.1421	1524	1434	1572	1470	1314	1494	1398	1488	0.0086118	0.0077774	1572	0.0088465	1.3788	2.7934	0.54158
untreated-b	8573	8587	8593	1.7666	0.9796	2.6179	1.4611	1422	1356	1470	1404	1254	1416	1344	1410	0.0085229	0.0084138	1488	0.0086441	1.7638	3.1879	0.52648
untreated-b	8574	8590	8596	1.6016	0.84385	2.4148	1.3676	1416	1344	1464	1398	1254	1422	1356	1416	0.0091697	0.0094191	1488	0.0089253	1.7	3.0743	0.49041
untreated-b	8587	8593	8610	1.7656	0.88331	2.7459	1.309	1506	1422	1554	1470	1344	1494	1416	1488	0.0086441	0.0085229	1560	0.0096668	1.4996	2.9285	0.51414
untreated-b	8587	8593	8611	1.6362	0.88331	2.995	1.309	1494	1422	1560	1470	1344	1494	1416	1488	0.0086441	0.0085229	1572	0.0090232	1.6362	3.3194	0.51798
untreated-b	8590	8596	8612	1.8304	0.80079	2.6709	1.2074	1500	1416	1548	1464	1356	1494	1422	1488	0.0089253	0.0091697	1572	0.0092117	1.6337	3.4278	0.50579
untreated-b	8909	8922	8942	1.3815	0.85097	2.344	1.2392	1386	1320	1440	1362	1224	1386	1302	1380	0.008317	0.0093971	1464	0.01001	1.3815	2.993	0.47402
untreated-b	8902	8923	8943	1.8982	0.88328	3.3073	1.4257	1404	1320	1458	1368	1218	1386	1302	1380	0.0097128	0.0087211	1458	0.0093787	1.7063	3.3073	0.45397
untreated-b	8902	8923	8944	1.829	0.88328	2.8681	1.4257	1404	1320	1452	1368	1218	1386	1302	1380	0.0097128	0.0087211	1464	0.0096764	1.6409	3.366	0.50703
untreated-b	8902	8924	8947	1.6376	0.75363	2.9819	1.3042	1398	1314	1458	1374	1218	1392	1302	1386	0.009623	0.0087211	1464	0.010177	1.5724	3.1256	0.43991
untreated-b	225	245	267	1.5698	0.78341	2.4113	1.1451	1392	1302	1434	1350	1212	1380	1296	1374	0.0086714	0.0089545	1458	0.010033	1.5128	3.1231	0.55127
untreated-b	225	245	268	1.7078	0.78341	2.4912	1.1451	1386	1302	1428	1350	1212	1380	1296	1374	0.0086714	0.0089545	1458	0.0095663	1.5708	3.3307	0.53662
untreated-b	245	267	281	2.029	0.78491	2.542	1.2057	1494	1392	1518	1434	1296	1464	1380	1458	0.010033	0.0086714	1530	0.0099232	1.5101	2.8716	0.52276
untreated-b	245	267	282	1.8317	0.78491	2.4858	1.2057	1476	1392	1512	1434	1296	1464	1380	1458	0.010033	0.0086714	1530	0.0093888	1.568	2.9402	0.51769
untreated-b	245	268	283	1.6347	0.85389	2.4154	1.2456	1470	1386	1512	1428	1296	1464	1380	1458	0.0095663	0.0086714	1530	0.0099048	1.5684	2.9988	0.54558
untreated-b	245	268	284	1.696	0.85389	2.5385	1.2456	1464	1386	1512	1428	1296	1464	1380	1458	0.0095663	0.0086714	1536	0.0090692	1.696	3.2023	0.52797
untreated-b	267	282	300	1.7027	0.91587	2.6732	1.2429	1554	1476	1596	1512	1380	1536	1464	1530	0.0093888	0.010033	1620	0.010996	1.3761	3.5072	0.51188
untreated-b	268	283	301	1.6998	0.81733	2.6177	1.2077	1554	1470	1596	1512	1380	1536	1464	1530	0.0099048	0.0095663	1614	0.010151	1.5067	3.1939	0.50217
untreated-b	268	283	302	1.7657	0.81733	2.9255	1.2077	1554	1470	1608	1512	1380	1536	1464	1530	0.0099048	0.0095663	1614	0.0091556	1.5045	3.0735	0.5475
untreated-b	283	302	312	1.8352	0.88284	2.8073	1.4627	1638	1554	1686	1608	1464	1620	1536	1614	0.0091556	0.0099048	1704	0.008753	1.6369	3.3186	0.56738
untreated-b	283	302	313	1.7676	0.88284	2.7353	1.4627	1638	1554	1686	1608	1464	1620	1536	1614	0.0091556	0.0099048	1704	0.0093492	1.5783	3.3087	0.49915
untreated-b	283	301	314	1.9022	0.8499	3.0551	1.3088	1638	1554	1686	1596	1464	1620	1536	1614	0.010151	0.0099048	1698	0.0098656	1.6372	3.4549	0.41356
untreated-b	282	300	318	1.7689	0.85134	2.7321	1.3366	1626	1554	1674	1596	1464	1626	1536	1620	0.010996	0.0093888	1692	0.0098059	1.7689	3.2536	0.54598
untreated-b	302	312	333	1.7017	0.91758	2.8116	1.4036	1716	1638	1770	1686	1536	1710	1620	1704	0.008753	0.0091556	1794	0.0087123	1.766	3.4584	0.55908
untreated-b	302	312	335	1.7688	0.91758	2.9245	1.4036	1722	1638	1770	1686	1536	1710	1620	1704	0.008753	0.0091556	1782	0.0095888	1.7018	3.1956	0.55026
untreated-b	312	335	354	1.8958	0.88438	2.9917	1.4623	1806	1722	1854	1770	1620	1788	1710	1782	0.0095888	0.008753	1872	0.0089059	1.6393	3.4514	0.53495
untreated-b	335	354	377	1.7257	0.94789	2.8695	1.4959	1872	1806	1926	1854	1710	1878	1788	1872	0.0089059	0.0095888	1944	0.0099427	1.8311	3.4452	0.48638
untreated-b	335	354	378	1.7257	0.94789	2.8695	1.4959	1872	1806	1932	1854	1710	1878	1788	1872	0.0089059	0.0095888	1944	0.0093435	1.7733	3.1813	0.5121
untreated-b	354	377	401	2.0274	0.86284	2.9223	1.4347	1968	1872	2010	1926	1788	1950	1878	1944	0.0099427	0.0089059	2022	0.0091883	1.6385	3.2559	0.53684
untreated-b	354	378	402	1.8291	0.86284	2.7364	1.4347	1962	1872	2004	1932	1788	1950	1878	1944	0.0093435	0.0089059	2028	0.0097299	1.703	3.4488	0.51286
untreated-b	758	778	800	1.5698	0.78341	2.4113	1.1451	1392	1302	1434	1350	1212	1380	1296	1374	0.0086714	0.0089545	1458	0.010033	1.5128	3.1231	0.55127
untreated-b	758	778	801	1.7078	0.78341	2.4912	1.1451	1386	1302	1428	1350	1212	1380	1296	1374	0.0086714	0.0089545	1458	0.0095663	1.5708	3.3307	0.53662
untreated-b	778	800	814	2.029	0.78491	2.542	1.2057	1494	1392	1518	1434	1296	1464	1380	1458	0.010033	0.0086714	1530	0.0099232	1.5101	2.8716	0.52276
untreated-b	778	800	815	1.8317	0.78491	2.4858	1.2057	1476	1392	1512	1434	1296	1464	1380	1458	0.010033	0.0086714	1530	0.0093888	1.568	2.9402	0.51769
untreated-b	778	801	816	1.6347	0.85389	2.4154	1.2456	1470	1386	1512	1428	1296	1464	1380	1458	0.0095663	0.0086714	1530	0.0099048	1.5684	2.9988	0.54558
untreated-b	778	801	817	1.696	0.85389	2.5385	1.2456	1464	1386	1512	1428	1296	1464	1380	1458	0.0095663	0.0086714	1536	0.0090692	1.696	3.2023	0.52797
untreated-b	800	815	833	1.7027	0.91587	2.6732	1.2429	1554	1476	1596	1512	1380	1536	1464	1530	0.0093888	0.010033	1620	0.010996	1.3761	3.5072	0.51188
untreated-b	801	816	834	1.6998	0.81733	2.6177	1.2077	1554	1470	1596	1512	1380	1536	1464	1530	0.0099048	0.0095663	1614	0.010151	1.5067	3.1939	0.50217
untreated-b	801	816	835	1.7657	0.81733	2.9255	1.2077	1554	1470	1608	1512	1380	1536	1464	1530	0.0099048	0.0095663	1614	0.0091556	1.5045	3.0735	0.5475
untreated-b	816	835	845	1.8352	0.88284	2.8073	1.4627	1638	1554	1686	1608	1464	1620	1536	1614	0.0091556	0.0099048	1704	0.008753	1.6369	3.3186	0.56738
untreated-b	816	835	846	1.7676	0.88284	2.7353	1.4627	1638	1554	1686	1608	1464	1620	1536	1614	0.0091556	0.0099048	1704	0.0093492	1.5783	3.3087	0.49915
untreated-b	816	834	847	1.9022	0.8499	3.0551	1.3088	1638	1554	1686	1596	1464	1620	1536	1614	0.010151	0.0099048	1698	0.0098656	1.6372	3.4549	0.41356
untreated-b	815	833	851	1.7689	0.85134	2.7321	1.3366	1626	1554	1674	1596	1464	1626	1536	1620	0.010996	0.0093888	1692	0.0098059	1.7689	3.2536	0.54598
untreated-b	835	845	866	1.7017	0.91758	2.8116	1.4036	1716	1638	1770	1686	1536	1710	1620	1704	0.008753	0.0091556	1794	0.0087123	1.766	3.4584	0.55908
untreated-b	835	845	868	1.7688	0.91758	2.9245	1.4036	1722	1638	1770	1686	1536	1710	1620	1704	0.008753	0.0091556	1782	0.0095888	1.7018	3.1956	0.55026
untreated-b	845	868	887	1.8958	0.88438	2.9917	1.4623	1806	1722	1854	1770	1620	1788	1710	1782	0.0095888	0.008753	1872	0.0089059	1.6393	3.4514	0.53495
untreated-b	868	887	910	1.7257	0.94789	2.8695	1.4959	1872	1806	1926	1854	1710	1878	1788	1872	0.0089059	0.0095888	1944	0.0099427	1.8311	3.4452	0.48638
untreated-b	868	887	911	1.7257	0.94789	2.8695	1.4959	1872	1806	1932	1854	1710	1878	1788	1872	0.0089059	0.0095888	1944	0.0093435	1.7733	3.1813	0.5121
untreated-b	887	910	934	2.0274	0.86284	2.9223	1.4347	1968	1872	2010	1926	1788	1950	1878	1944	0.0099427	0.0089059	2022	0.0091883	1.6385	3.2559	0.53684
untreated-b	887	911	935	1.8291	0.86284	2.7364	1.4347	1962	1872	2004	1932	1788	1950	1878	1944	0.0093435	0.0089059	2028	0.0097299	1.703	3.4488	0.51286
untreated-b	1412	1436	1442	1.8991	0.82045	2.9276	1.3633	1704	1608	1752	1656	1512	1674	1596	1668	0.010267	0.010139	1764	0.0086711	1.5036	3.2586	0.54886
untreated-b	1412	1435	1447	1.7009	0.88365	2.8595	1.2085	1698	1620	1752	1656	1512	1692	1596	1686	0.0095448	0.010139	1776	0.0094203	1.6362	3.5912	0.50854
untreated-b	1412	1435	1448	1.7632	0.88365	2.8014	1.2085	1698	1620	1746	1656	1512	1692	1596	1686	0.0095448	0.010139	1770	0.0090989	1.637	3.4885	0.54657
untreated-b	1436	1442	1461	1.7035	0.94957	2.7387	1.4638	1770	1704	1824	1752	1596	1770	1674	1764	0.0086711	0.010267	1830	0.0089719	1.7035	2.8736	0.57035
untreated-b	1436	1442	1462	1.7049	0.94957	2.5272	1.4638	1770	1704	1818	1752	1596	1770	1674	1764	0.0086711	0.010267	1842	0.0088628	1.7049	3.1272	0.52591
untreated-b	1435	1447	1467	1.9607	0.85047	3.1302	1.4297	1782	1698	1830	1752	1596	1782	1692	1776	0.0094203	0.0095448	1842	0.0098332	1.9607	3.523	0.5429
untreated-b	1435	1447	1468	1.6357	0.85047	2.4866	1.4297	1782	1698	1830	1752	1596	1782	1692	1776	0.0094203	0.0095448	1860	0.0094097	1.6357	3.3137	0.51633
untreated-b	1442	1461	1469	1.5684	0.85176	2.5481	1.3694	1842	1770	1896	1824	1674	1836	1770	1830	0.0089719	0.0086711	1920	0.0091721	1.5056	3.1945	0.5016
untreated-b	1447	1468	1477	1.961	0.81784	2.9973	1.2433	1878	1782	1920	1830	1692	1866	1782	1860	0.0094097	0.0094203	1932	0.0099608	1.8294	3.4404	0.52261
untreated-b	1447	1468	1478	1.8311	0.81784	2.7321	1.2433	1884	1782	1926	1830	1692	1866	1782	1860	0.0094097	0.0094203	1950	0.0091418	1.6371	3.453	0.51927
untreated-b	1461	1469	1482	2.0333	0.78418	3.4471	1.274	1944	1842	1998	1896	1770	1926	1836	1920	0.0091721	0.0089719	1998	0.0098939	1.6997	3.4471	0.53535
untreated-b	1461	1469	1483	1.5847	0.78418	2.5418	1.274	1932	1842	1980	1896	1770	1926	1836	1920	0.0091721	0.0089719	1998	0.010539	1.4407	3.1111	0.53701
untreated-b	1468	1478	1494	2.0889	0.91557	3.1912	1.366	1974	1884	2016	1926	1782	1956	1866	1950	0.0091418	0.0094097	2028	0.010124	1.7677	3.5734	0.55164
untreated-b	1468	1478	1495	1.83	0.91557	2.6777	1.366	1968	1884	2010	1926	1782	1956	1866	1950	0.0091418	0.0094097	2028	0.0095503	1.7064	3.3088	0.51633
untreated-b	1469	1482	1498	2.0974	1.0166	3.052	1.7235	2028	1944	2064	1998	1836	2004	1926	1998	0.0098939	0.0091721	2076	0.0091155	1.8359	3.3142	0.46994
untreated-b	1469	1482	1499	1.7021	1.0166	3.0021	1.7235	2010	1944	2070	1998	1836	2004	1926	1998	0.0098939	0.0091721	2076	0.0092133	1.7048	3.2571	0.51193
untreated-b	1478	1495	1509	1.9008	0.91499	2.9248	1.3388	2058	1968	2100	2010	1866	2034	1956	2028	0.0095503	0.0091418	2112	0.010173	1.5083	3.323	0.50208
untreated-b	1478	1495	1510	1.7716	0.91499	2.4211	1.3388	2040	1968	2076	2010	1866	2034	1956	2028	0.0095503	0.0091418	2106	0.0094933	1.7008	3.3251	0.4684
untreated-b	1482	1499	1520	1.8315	0.85107	2.9779	1.501	2094	2010	2148	2070	1926	2082	2004	2076	0.0092133	0.0098939	2154	0.0086738	1.7043	3.1156	0.50072
untreated-b	1495	1510	1527	1.7645	0.88579	2.8077	1.2105	2118	2040	2166	2076	1956	2112	2034	2106	0.0094933	0.0095503	2184	0.0091965	1.6314	3.3255	0.50622
untreated-b	2130	2150	2163	1.8319	0.81947	2.7329	1.2373	2370	2292	2412	2334	2202	2370	2292	2364	0.0097672	0.0096935	2424	0.010067	1.8319	3.1834	0.50427
untreated-b	2558	2582	2607	1.8348	0.81941	2.8604	1.2768	1812	1716	1860	1770	1644	1800	1716	1794	0.0091236	0.0096173	1884	0.0094758	1.6364	3.6469	0.49089
untreated-b	2558	2581	2608	1.7605	0.81833	2.4736	1.3043	1806	1722	1842	1770	1644	1800	1716	1794	0.0096097	0.0096173	1884	0.0095318	1.697	3.6294	0.50073
untreated-b	2558	2582	2609	1.638	0.81941	2.9341	1.2768	1806	1716	1866	1770	1644	1800	1716	1794	0.0091236	0.0096173	1878	0.0099086	1.5056	3.2466	0.45832
untreated-b	2582	2607	2629	1.8978	0.91742	2.8634	1.4302	1890	1812	1938	1860	1716	1890	1800	1884	0.0094758	0.0091236	1956	0.0097215	1.8978	3.4429	0.48733
untreated-b	2581	2608	2630	1.8147	0.88025	2.7989	1.2368	1884	1806	1944	1842	1716	1890	1800	1884	0.0095318	0.0096097	1956	0.010116	1.693	3.2514	0.48571
untreated-b	2582	2607	2631	1.6364	0.91742	2.5398	1.4302	1890	1812	1932	1860	1716	1890	1800	1884	0.0094758	0.0091236	1950	0.0098726	1.6364	3.045	0.52915
untreated-b	2642	2669	2691	1.6913	0.89072	2.4674	1.4632	2172	2100	2220	2154	1962	2184	2112	2178	0.0098494		2244	0.010251	1.6405	3.1253	0.47297
untreated-b	2669	2691	2711	1.6314	0.84563	2.6128	1.2337	2262	2172	2304	2220	2112	2250	2184	2244	0.010251	0.0098494	2322	0.0096286	1.5761	3.0661	0.44812
untreated-b	2691	2711	2735	1.8289	0.81572	2.8508	1.3064	2352	2262	2400	2304	2184	2328	2250	2322	0.0096286	0.010251	2418	0.009327	1.5072	3.4404	0.44566
untreated-b	3139	3150	3155	1.3113	0.79654	2.2786	1.2374	1908	1842	1962	1890	1776	1908	1848	1902	0.011176	0.011383	1980	0.011152	1.3113	3.051	0.43049
untreated-b	3139	3149	3159	1.5748	0.75398	2.3553	1.2695	1938	1860	1980	1914	1776	1938	1848	1932	0.0099112	0.011383	2010	0.0096433	1.5748	3.1794	0.47506
untreated-b	3549	3569	3581	1.6991	0.75388	2.4166	1.2938	1494	1416	1524	1446	1320	1488	1404	1482	0.011349	0.0096379	1548	0.009648	1.7689	3.0047	0.55359
untreated-b	3549	3569	3582	1.7696	0.75388	2.9889	1.2938	1488	1416	1542	1446	1320	1488	1404	1482	0.011349	0.0096379	1542	0.010284	1.7696	2.9889	0.51303
untreated-b	3569	3582	3590	1.575	0.88478	2.358	1.4944	1566	1488	1614	1542	1404	1548	1488	1542	0.010284	0.011349	1632	0.0085003	1.3796	2.8021	0.57255
untreated-b	3569	3582	3591	1.8264	0.88478	2.6771	1.4944	1572	1488	1614	1542	1404	1548	1488	1542	0.010284	0.011349	1626	0.0086798	1.5721	3.0558	0.53634
untreated-b	3569	3581	3594	1.7006	0.84954	2.5404	1.2083	1560	1494	1602	1524	1404	1554	1488	1548	0.009648	0.011349	1632	0.0095024	1.6426	3.3497	0.50911
untreated-b	3569	3581	3595	1.4479	0.84954	2.42	1.2083	1566	1494	1614	1524	1404	1554	1488	1548	0.009648	0.011349	1632	0.010132	1.3115	2.9352	0.53255
untreated-b	3582	3591	3606	1.4406	0.91321	2.0337	1.3385	1638	1572	1668	1614	1488	1632	1548	1626	0.0086798	0.010284	1704	0.010414	1.4415	3.0034	0.52335
untreated-b	3582	3591	3607	1.6339	0.91321	2.7287	1.3385	1638	1572	1686	1614	1488	1632	1548	1626	0.0086798	0.010284	1704	0.010051	1.7018	3.2461	0.53554
untreated-b	3581	3595	3611	1.7083	0.72394	2.863	1.21	1656	1566	1704	1614	1488	1638	1554	1632	0.010132	0.009648	1710	0.010375	1.5081	3.0473	0.46286
untreated-b	3581	3595	3612	1.6996	0.72394	2.6126	1.21	1662	1566	1704	1614	1488	1638	1554	1632	0.010132	0.009648	1722	0.0093997	1.5082	3.178	0.53931
untreated-b	3591	3607	3624	1.7005	0.81696	2.6743	1.3644	1722	1638	1770	1686	1548	1710	1632	1704	0.010051	0.0086798	1788	0.0092595	1.5742	3.1333	0.45371
untreated-b	3595	3611	3628	1.7077	0.85414	2.7908	1.4315	1722	1656	1770	1704	1554	1716	1638	1710	0.010375	0.010132	1788	0.010316	1.6406	3.3803	0.45637
untreated-b	3595	3611	3629	1.4424	0.85414	2.5516	1.4315	1722	1656	1776	1704	1554	1716	1638	1710	0.010375	0.010132	1788	0.010244	1.441	3.0062	0.45705
untreated-b	3595	3612	3632	1.7074	0.84978	2.804	1.3063	1746	1662	1794	1704	1554	1728	1638	1722	0.0093997	0.010132	1812	0.0092677	1.5053	3.3082	0.54259
untreated-b	3611	3628	3644	1.6997	0.85383	2.6692	1.3954	1800	1722	1848	1770	1638	1794	1716	1788	0.010316	0.010375	1866	0.0089211	1.5726	3.0559	0.47962
untreated-b	3612	3632	3655	1.7031	0.85371	2.6187	1.402	1830	1746	1878	1794	1638	1818	1728	1812	0.0092677	0.0093997	1896	0.010028	1.571	3.4312	0.49908
untreated-b	3632	3655	3664	1.8988	0.85154	2.7336	1.3093	1920	1830	1962	1878	1728	1902	1818	1896	0.010028	0.0092677	1980	0.0084223	1.6424	3.1847	0.55982
untreated-b	3632	3655	3665	2.0261	0.85154	3.0036	1.3093	1920	1830	1968	1878	1728	1902	1818	1896	0.010028	0.0092677	1986	0.0084554	1.7012	3.508	0.50348
untreated-b	3655	3664	3674	2.0275	0.94939	2.9916	1.3668	2010	1920	2052	1962	1818	1986	1902	1980	0.0084223	0.010028	2070	0.0090565	1.7683	3.5796	0.50611
untreated-b	3664	3674	3687	1.7898	1.0137	2.9266	1.4958	2070	2010	2124	2052	1902	2076	1986	2070	0.0090565	0.0084223	2136	0.0091959	1.8925	3.3144	0.46321
untreated-b	3664	3674	3688	1.7898	1.0137	2.6605	1.4958	2070	2010	2124	2052	1902	2076	1986	2070	0.0090565	0.0084223	2136	0.0096198	1.7089	2.8711	0.52528
untreated-b	3674	3688	3703	1.5748	0.89491	2.5298	1.3302	2148	2070	2196	2124	1986	2142	2076	2136	0.0096198	0.0090565	2208	0.0099843	1.5089	2.8712	0.46448
untreated-b	3674	3688	3704	1.5069	0.89491	2.2889	1.3302	2148	2070	2196	2124	1986	2142	2076	2136	0.0096198	0.0090565	2220	0.0093414	1.4503	2.9127	0.49092
untreated-b	3688	3704	3726	1.7054	0.75345	2.4818	1.1444	2250	2148	2298	2196	2076	2226	2142	2220	0.0093414	0.0096198	2316	0.0078314	1.3795	2.8732	0.4892
untreated-b	3688	3704	3727	1.57	0.75345	2.4828	1.1444	2226	2148	2280	2196	2076	2226	2142	2220	0.0093414	0.0096198	2292	0.0089939	1.57	2.8	0.45375
untreated-b	4192	4206	4224	1.7644	0.85273	2.6213	1.3015	2154	2064	2196	2118	1956	2142	2046	2136	0.0082855	0.0075358	2220	0.0089056	1.6339	3.25	0.45531
untreated-b	4192	4206	4225	1.5096	0.85273	2.1568	1.3015	2154	2064	2202	2118	1956	2142	2046	2136	0.0082855	0.0075358	2226	0.0085833	1.3794	2.7274	0.46762
untreated-b	4192	4205	4231	1.9035	1.0136	2.6785	1.342	2178	2094	2220	2130	1956	2154	2046	2148	0.0075041	0.0075358	2244	0.0084381	1.5708	3.2596	0.4769
untreated-b	4192	4205	4232	1.7682	1.0136	2.8048	1.342	2178	2094	2232	2130	1956	2154	2046	2148	0.0075041	0.0075358	2250	0.0079565	1.5719	3.247	0.44861
untreated-b	4205	4231	4251	1.8366	0.95177	2.8762	1.3393	2262	2178	2310	2220	2046	2250	2154	2244	0.0084381	0.0075041	2334	0.0094634	1.7015	3.6994	0.44624
untreated-b	4231	4251	4277	1.8979	0.91828	2.8701	1.4381	2340	2262	2394	2310	2154	2340	2250	2334	0.0094634	0.0084381	2400	0.0085767	1.8979	3.1706	0.47166
untreated-b	4576	4596	4618	1.8994	0.8192	3.18	1.5298	1380	1302	1434	1362	1206	1368	1278	1362	0.010322	0.0090774	1440	0.0095306	1.7022	3.3261	0.39877
untreated-b	4596	4618	4632	1.7098	0.94971	2.9292	1.59	1446	1380	1500	1434	1278	1446	1368	1440	0.0095306	0.010322	1506	0.010587	1.7098	3.1295	0.39856
untreated-b	4596	4618	4633	1.8304	0.94971	2.2855	1.59	1458	1380	1482	1434	1278	1446	1368	1440	0.0095306	0.010322	1524	0.0094512	1.6977	3.5208	0.39532
untreated-b	4618	4632	4649	1.833	0.85492	2.8058	1.4646	1530	1446	1578	1500	1368	1512	1446	1506	0.010587	0.0095306	1596	0.0092553	1.58	3.2458	0.42295
untreated-b	4618	4633	4652	1.8926	0.91518	2.8595	1.1427	1530	1458	1572	1482	1368	1530	1446	1524	0.0094512	0.0095306	1590	0.009924	1.8926	3.3775	0.40766
untreated-b	4618	4633	4653	1.9584	0.91518	2.4729	1.1427	1554	1458	1578	1482	1368	1530	1446	1524	0.0094512	0.0095306	1602	0.0092064	1.6326	3.1231	0.40939
untreated-b	4633	4653	4663	1.8988	0.97922	2.7403	1.2365	1638	1554	1680	1578	1446	1608	1530	1602	0.0092064	0.0094512	1698	0.0091053	1.4425	3.313	0.44286
untreated-b	4653	4663	4677	1.7072	0.94938	2.8594	1.3701	1716	1638	1770	1680	1530	1704	1608	1698	0.0091053	0.0092064	1776	0.0093085	1.6425	2.9965	0.50101
untreated-b	4653	4663	4678	1.896	0.94938	3.048	1.3701	1722	1638	1770	1680	1530	1704	1608	1698	0.0091053	0.0092064	1782	0.01002	1.5771	3.3719	0.44106
untreated-b	4663	4677	4686	1.5126	0.85361	2.4815	1.4297	1782	1716	1830	1770	1608	1782	1704	1776	0.0093085	0.0091053	1848	0.011354	1.5126	3.1678	0.42329
untreated-b	4677	4686	4697	1.572	0.75631	2.332	1.2407	1854	1782	1896	1830	1704	1854	1782	1848	0.011354	0.0093085	1920	0.010058	1.572	2.9313	0.38725
untreated-b	4736	4753	4758	1.7685	0.8543	2.5483	1.3689	2316	2232	2358	2280	2130	2304	2220	2298	0.0091644	0.0086297	2376	0.0091332	1.6361	3.0606	0.45155
untreated-b	5162	5176	5190	1.83	0.85066	2.877	1.177	2064	1962	2118	2004	1854	2034	1944	2028	0.0078955	0.0089273	2124	0.00875	1.3767	3.0362	0.50613
untreated-b	5176	5190	5209	1.8974	0.91498	2.5354	1.4385	2148	2064	2190	2118	1944	2130	2034	2124	0.00875	0.0078955	2202	0.0077127	1.6346	2.851	0.48583
untreated-b	5176	5190	5210	1.5058	0.91498	2.2892	1.4385	2148	2064	2196	2118	1944	2130	2034	2124	0.00875	0.0078955	2220	0.0079331	1.3789	2.8671	0.4897
untreated-b	5190	5210	5217	1.8297	0.75292	2.6677	1.1446	2256	2148	2298	2196	2034	2226	2130	2220	0.0079331	0.00875	2328	0.008682	1.4527	3.3745	0.48194
untreated-b	5190	5210	5218	1.8874	0.75292	2.1495	1.1446	2262	2148	2286	2196	2034	2226	2130	2220	0.0079331	0.00875	2316	0.0078302	1.4467	2.9276	0.37919
untreated-b	5210	5218	5227	1.6409	0.94369	2.7269	1.0748	2346	2262	2406	2286	2130	2322	2226	2316	0.0078302	0.0079331	2418	0.0080289	1.3815	3.0462	0.4296
untreated-b	5210	5218	5228	1.8968	0.94369	2.8695	1.0748	2346	2262	2394	2286	2130	2322	2226	2316	0.0078302	0.0079331	2406	0.0085756	1.5709	3.2478	0.3969
untreated-b	5210	5217	5234	1.5687	0.91484	2.8615	1.3338	2340	2256	2400	2298	2130	2334	2226	2328	0.008682	0.0079331	2412	0.0087705	1.507	3.0739	0.45787
untreated-b	5541	5564	5581	1.5033	1.0472	2.7421	1.5002	1440	1386	1506	1428	1260	1440	1362	1434	0.0086724	0.0089016	1518	0.0088196	1.5033	3.0541	0.41648
untreated-b	5696	5715	5733	2.0328	1.0448	3.308	1.6876	2238	2160	2286	2208	2076	2220	2154	2214	0.0098883	0.0088628	2292	0.0098729	1.7703	3.5686	0.35516
untreated-b	5695	5714	5741	2.0252	1.0785	2.9881	1.5998	2250	2160	2292	2208	2076	2238	2148	2232	0.0084928	0.0097449	2316	0.0080922	1.9585	3.5689	0.46631
untreated-b	5714	5741	5756	1.7845	1.0126	3.1076	1.4941	2316	2250	2382	2292	2148	2322	2238	2316	0.0080922	0.0084928	2382	0.0091266	1.8324	3.1076	0.41546
untreated-b	227	238	257	1.5043	0.85008	2.4222	1.2347	1410	1332	1464	1374	1206	1404	1308	1398	0.008011	0.0080091	1482	0.0094361	1.4403	2.942	0.50513
untreated-b	227	238	258	2.026	0.85008	2.7447	1.2347	1452	1332	1488	1374	1206	1404	1308	1398	0.008011	0.0080091	1512	0.0082501	1.5074	3.5592	0.51634
untreated-b	227	237	260	1.6902	0.88373	2.6125	1.3719	1416	1338	1470	1392	1206	1422	1308	1416	0.0081659	0.0080091	1482	0.0094139	1.7004	2.9889	0.53415
untreated-b	237	260	270	1.9601	0.84511	2.6666	1.3062	1512	1416	1554	1470	1308	1488	1422	1482	0.0094139	0.0081659	1578	0.0082134	1.5713	3.3312	0.55369
untreated-b	237	260	271	1.5071	0.84511	2.4174	1.3062	1500	1416	1554	1470	1308	1488	1422	1482	0.0094139	0.0081659	1566	0.0084297	1.3767	2.6768	0.51032
untreated-b	238	258	275	2.1554	1.013	3.1917	1.3723	1542	1452	1584	1488	1308	1518	1404	1512	0.0082501	0.008011	1596	0.0090373	1.8275	3.6345	0.53687
untreated-b	260	270	282	1.8338	0.98007	2.4214	1.3333	1596	1512	1638	1554	1422	1584	1488	1578	0.0082134	0.0094139	1662	0.0076243	1.6381	2.9931	0.61076
untreated-b	260	270	283	1.7014	0.98007	2.6805	1.3333	1590	1512	1650	1554	1422	1584	1488	1578	0.0082134	0.0094139	1674	0.0077252	1.6315	3.2629	0.52127
untreated-b	258	275	287	1.8897	1.0777	3.1953	1.5958	1608	1542	1668	1584	1404	1602	1518	1596	0.0090373	0.0082501	1680	0.0087639	1.8956	3.6941	0.4896
untreated-b	270	282	301	1.7667	0.91688	2.6046	1.2107	1698	1596	1746	1638	1488	1668	1584	1662	0.0076243	0.0082134	1758	0.0079024	1.4354	2.9447	0.55625
untreated-b	270	283	304	1.5713	0.85071	2.7427	1.3403	1680	1590	1740	1650	1488	1680	1584	1674	0.0077252	0.0082134	1752	0.0091147	1.5713	3.04	0.49366
untreated-b	283	304	321	1.6368	0.78566	2.4082	1.3714	1764	1680	1806	1740	1584	1758	1680	1752	0.0091147	0.0077252	1824	0.01043	1.5014	3.0027	0.47661
untreated-b	282	301	323	1.5062	0.88334	2.2167	1.3023	1782	1698	1824	1746	1584	1764	1668	1758	0.0079024	0.0076243	1848	0.009265	1.3153	2.7443	0.58764
untreated-b	301	323	333	1.4418	0.75311	2.3964	1.1083	1860	1782	1914	1824	1668	1854	1764	1848	0.009265	0.0079024	1932	0.00889	1.4446	2.8084	0.59258
untreated-b	400	422	457	1.6344	1.0069	2.6625	1.3078	2316	2238	2364	2274	2106	2304	2190	2298	0.0070307	0.009171	2382	0.0084459	1.5768	2.9896	0.55456
untreated-b	725	736	755	1.5043	0.85008	2.4222	1.2347	1410	1332	1464	1374	1206	1404	1308	1398	0.008011	0.0080091	1482	0.0094361	1.4403	2.942	0.50513
untreated-b	725	736	756	2.026	0.85008	2.7447	1.2347	1452	1332	1488	1374	1206	1404	1308	1398	0.008011	0.0080091	1512	0.0082501	1.5074	3.5592	0.51634
untreated-b	725	735	758	1.6902	0.88373	2.6125	1.3719	1416	1338	1470	1392	1206	1422	1308	1416	0.0081659	0.0080091	1482	0.0094139	1.7004	2.9889	0.53415
untreated-b	735	758	768	1.9601	0.84511	2.6666	1.3062	1512	1416	1554	1470	1308	1488	1422	1482	0.0094139	0.0081659	1578	0.0082134	1.5713	3.3312	0.55369
untreated-b	735	758	769	1.5071	0.84511	2.4174	1.3062	1500	1416	1554	1470	1308	1488	1422	1482	0.0094139	0.0081659	1566	0.0084297	1.3767	2.6768	0.51032
untreated-b	736	756	773	2.1554	1.013	3.1917	1.3723	1542	1452	1584	1488	1308	1518	1404	1512	0.0082501	0.008011	1596	0.0090373	1.8275	3.6345	0.53687
untreated-b	758	768	780	1.8338	0.98007	2.4214	1.3333	1596	1512	1638	1554	1422	1584	1488	1578	0.0082134	0.0094139	1662	0.0076243	1.6381	2.9931	0.61076
untreated-b	758	768	781	1.7014	0.98007	2.6805	1.3333	1590	1512	1650	1554	1422	1584	1488	1578	0.0082134	0.0094139	1674	0.0077252	1.6315	3.2629	0.52127
untreated-b	756	773	785	1.8897	1.0777	3.1953	1.5958	1608	1542	1668	1584	1404	1602	1518	1596	0.0090373	0.0082501	1680	0.0087639	1.8956	3.6941	0.4896
untreated-b	768	780	799	1.7667	0.91688	2.6046	1.2107	1698	1596	1746	1638	1488	1668	1584	1662	0.0076243	0.0082134	1758	0.0079024	1.4354	2.9447	0.55625
untreated-b	768	781	802	1.5713	0.85071	2.7427	1.3403	1680	1590	1740	1650	1488	1680	1584	1674	0.0077252	0.0082134	1752	0.0091147	1.5713	3.04	0.49366
untreated-b	781	802	819	1.6368	0.78566	2.4082	1.3714	1764	1680	1806	1740	1584	1758	1680	1752	0.0091147	0.0077252	1824	0.01043	1.5014	3.0027	0.47661
untreated-b	780	799	821	1.5062	0.88334	2.2167	1.3023	1782	1698	1824	1746	1584	1764	1668	1758	0.0079024	0.0076243	1848	0.009265	1.3153	2.7443	0.58764
untreated-b	799	821	831	1.4418	0.75311	2.3964	1.1083	1860	1782	1914	1824	1668	1854	1764	1848	0.009265	0.0079024	1932	0.00889	1.4446	2.8084	0.59258
untreated-b	898	920	955	1.6344	1.0069	2.6625	1.3078	2316	2238	2364	2274	2106	2304	2190	2298	0.0070307	0.009171	2382	0.0084459	1.5768	2.9896	0.55456
untreated-b	1238	1248	1265	1.7686	0.88235	3.0694	1.4022	1386	1314	1452	1356	1224	1386	1308	1380	0.010651	0.0097527	1458	0.0091235	1.7686	3.2392	0.47687
untreated-b	1238	1248	1266	2.0334	0.88235	3.066	1.4022	1386	1314	1440	1356	1224	1386	1308	1380	0.010651	0.0097527	1458	0.0089121	2.0334	3.704	0.51038
untreated-b	1248	1266	1285	1.9596	1.0167	2.9396	1.533	1470	1386	1518	1440	1308	1464	1386	1458	0.0089121	0.010651	1530	0.0090688	1.9572	3.3938	0.51804
untreated-b	1343	1356	1372	1.9586	0.94638	3.1239	1.4645	2022	1944	2070	1992	1848	2022	1944	2016	0.0094743	0.0088543	2094	0.0085589	1.9586	3.6413	0.50806
untreated-b	1404	1419	1435	1.8313	0.94983	2.8547	1.3961	2370	2286	2418	2328	2202	2358	2280	2352	0.010192	0.01023	2430	0.0096091	1.6991	3.32	0.53622
untreated-b	1934	1950	1969	1.96	0.94588	2.8543	1.434	2244	2166	2286	2208	2064	2238	2160	2232	0.010012	0.0099684	2298	0.0093335	1.8941	3.2649	0.52964
untreated-b	1950	1969	1988	1.8302	0.98002	3.0569	1.4272	2316	2244	2376	2286	2160	2304	2238	2298	0.0093335	0.010012	2388	0.0089372	1.5054	3.4408	0.52189
untreated-b	2433	2440	2454	1.7099	0.79622	2.6159	1.2059	2208	2106	2256	2160	2046	2196	2112	2190	0.0089334	0.0097789	2280	0.0094339	1.5076	3.3123	0.45959
untreated-b	2433	2440	2455	1.7643	0.79622	2.8545	1.2059	2202	2106	2256	2160	2046	2196	2112	2190	0.0089334	0.0097789	2274	0.0090085	1.6984	3.3816	0.54397
untreated-b	2440	2454	2472	1.571	0.85493	2.3537	1.308	2286	2208	2334	2256	2112	2286	2196	2280	0.0094339	0.0089334	2364	0.0086061	1.571	2.9931	0.50327
untreated-b	2760	2777	2793	1.8947	0.97865	2.8556	1.4352	1428	1350	1476	1392	1272	1416	1344	1410	0.0092103	0.009622	1494	0.0083168	1.6979	3.3042	0.51277
untreated-b	2760	2778	2795	1.7678	0.88392	2.6749	1.3406	1428	1350	1476	1398	1272	1422	1344	1416	0.0094444	0.009622	1488	0.0094023	1.5782	3.0098	0.4747
untreated-b	2778	2795	2806	1.7019	0.88391	2.55	1.3375	1512	1428	1560	1476	1344	1494	1422	1488	0.0094023	0.0094444	1572	0.0086041	1.5088	2.9403	0.5128
untreated-b	2778	2795	2807	1.6407	0.88391	2.6168	1.3375	1512	1428	1560	1476	1344	1494	1422	1488	0.0094023	0.0094444	1584	0.0092086	1.4494	3.3085	0.45459
untreated-b	2795	2807	2826	1.6987	0.82034	2.6757	1.3084	1596	1512	1644	1560	1422	1590	1494	1584	0.0092086	0.0094023	1662	0.01015	1.5666	3.3151	0.47616
untreated-b	2795	2807	2827	1.6386	0.82034	2.6213	1.3084	1596	1512	1644	1560	1422	1590	1494	1584	0.0092086	0.0094023	1662	0.0088024	1.7052	3.0034	0.49656
untreated-b	2807	2826	2843	1.7704	0.84933	2.5446	1.3379	1680	1596	1728	1644	1494	1668	1590	1662	0.01015	0.0092086	1752	0.0079862	1.633	3.1976	0.475
untreated-b	2807	2827	2844	1.8282	0.81928	2.8094	1.3106	1692	1596	1746	1644	1494	1668	1590	1662	0.0088024	0.0092086	1758	0.0084037	1.5715	3.2506	0.49359
untreated-b	2827	2844	2863	1.6325	0.91412	3.1824	1.4047	1782	1692	1860	1746	1590	1764	1668	1758	0.0084037	0.0088024	1866	0.0083734	1.4399	3.3146	0.47431
untreated-b	2845	2864	2883	1.6384	0.91559	2.4174	1.3393	1848	1770	1890	1818	1668	1836	1764	1830	0.0086961	0.0085951	1914	0.0095844	1.5017	3.1957	0.47965
untreated-b	2845	2864	2884	1.836	0.91559	2.986	1.3393	1854	1770	1908	1818	1668	1836	1764	1830	0.0086961	0.0085951	1914	0.0092655	1.5684	3.2458	0.50034
untreated-b	2845	2865	2887	1.6339	0.98008	2.5547	1.3663	1854	1794	1902	1836	1668	1848	1764	1842	0.008334	0.0085951	1920	0.010075	1.5042	3.1063	0.4813
untreated-b	2845	2865	2888	1.4455	0.98008	3.1264	1.3663	1854	1794	1938	1836	1668	1848	1764	1842	0.008334	0.0085951	1944	0.0091598	1.3729	3.3089	0.47489
untreated-b	2864	2883	2904	1.7078	0.81922	2.3581	1.2087	1932	1848	1974	1890	1764	1920	1836	1914	0.0095844	0.0086961	1992	0.0092742	1.4396	2.8643	0.55356
untreated-b	2864	2884	2905	1.7059	0.91801	2.606	1.493	1932	1854	1980	1908	1764	1920	1836	1914	0.0092655	0.0086961	1986	0.0090213	1.5105	2.743	0.50392
untreated-b	2864	2884	2906	1.7666	0.91801	2.7531	1.493	1932	1854	1980	1908	1764	1920	1836	1914	0.0092655	0.0086961	1992	0.0096763	1.6397	3.1858	0.57066
untreated-b	2865	2887	2907	1.7051	0.81695	2.5353	1.2773	1944	1854	1986	1902	1764	1926	1848	1920	0.010075	0.008334	2004	0.0098385	1.5063	3.1291	0.4682
untreated-b	2865	2887	2908	1.9658	0.81695	2.7455	1.2773	1956	1854	1998	1902	1764	1926	1848	1920	0.010075	0.008334	2016	0.0086202	1.5763	3.3334	0.47549
untreated-b	2884	2905	2926	1.578	0.85295	2.5514	1.303	2010	1932	2070	1980	1836	1992	1920	1986	0.0090213	0.0092655	2082	0.0086496	1.4422	3.0012	0.48929
untreated-b	2884	2905	2927	1.7042	0.85295	2.8597	1.303	2016	1932	2076	1980	1836	1992	1920	1986	0.0090213	0.0092655	2082	0.0084271	1.4432	2.9332	0.56494
untreated-b	2884	2906	2930	1.6358	0.8833	2.4149	1.3766	1998	1932	2046	1980	1836	1998	1920	1992	0.0096763	0.0092655	2082	0.007829	1.6358	3.1977	0.53833
untreated-b	2884	2906	2931	1.6332	0.8833	2.5473	1.3766	2004	1932	2052	1980	1836	1998	1920	1992	0.0096763	0.0092655	2076	0.0098563	1.5695	3.2419	0.47274
untreated-b	2887	2907	2932	1.764	0.85256	2.7531	1.2677	2022	1944	2070	1986	1848	2010	1926	2004	0.0098385	0.010075	2076	0.0095105	1.5742	3.0001	0.4912
untreated-b	2906	2931	2946	1.6331	0.81661	2.606	1.2736	2088	2004	2142	2052	1920	2082	1998	2076	0.0098563	0.0096763	2160	0.0085788	1.5771	3.0533	0.50099
untreated-b	2906	2931	2947	1.7018	0.81661	2.608	1.2736	2088	2004	2136	2052	1920	2082	1998	2076	0.0098563	0.0096763	2148	0.010028	1.5033	3.063	0.52723
untreated-b	2905	2927	2953	1.5046	0.8521	2.3463	1.4298	2094	2016	2142	2076	1920	2088	1992	2082	0.0084271	0.0090213	2166	0.0098686	1.5054	3.0582	0.49751
untreated-b	2906	2930	2954	1.7662	0.81788	2.6074	1.2074	2100	1998	2148	2046	1920	2088	1998	2082	0.007829	0.0096763	2178	0.0089733	1.6395	3.5141	0.47564
untreated-b	2931	2946	2975	1.9654	0.81656	2.7967	1.303	2196	2088	2238	2142	1998	2166	2082	2160	0.0085788	0.0098563	2244	0.0085129	1.5113	2.9934	0.47829
untreated-b	2930	2954	2984	1.6628	0.88308	2.4788	1.3037	2172	2100	2214	2148	1998	2184	2088	2178	0.0089733	0.007829	2244	0.0093709	1.8958	3.3027	0.52236
untreated-b	2930	2954	2985	1.8953	0.88308	2.8608	1.3037	2208	2100	2262	2148	1998	2184	2088	2178	0.0089733	0.007829	2274	0.0079712	1.5709	3.2599	0.51362
[truncated: 13,679 more rows]
