# Supplementary figures and images for: Two different cell-cycle processes determine the timing of cell division in Escherichia coli
Source: eLife journal article supplement (doi:10.7554/elife.67495), 2021-10-06

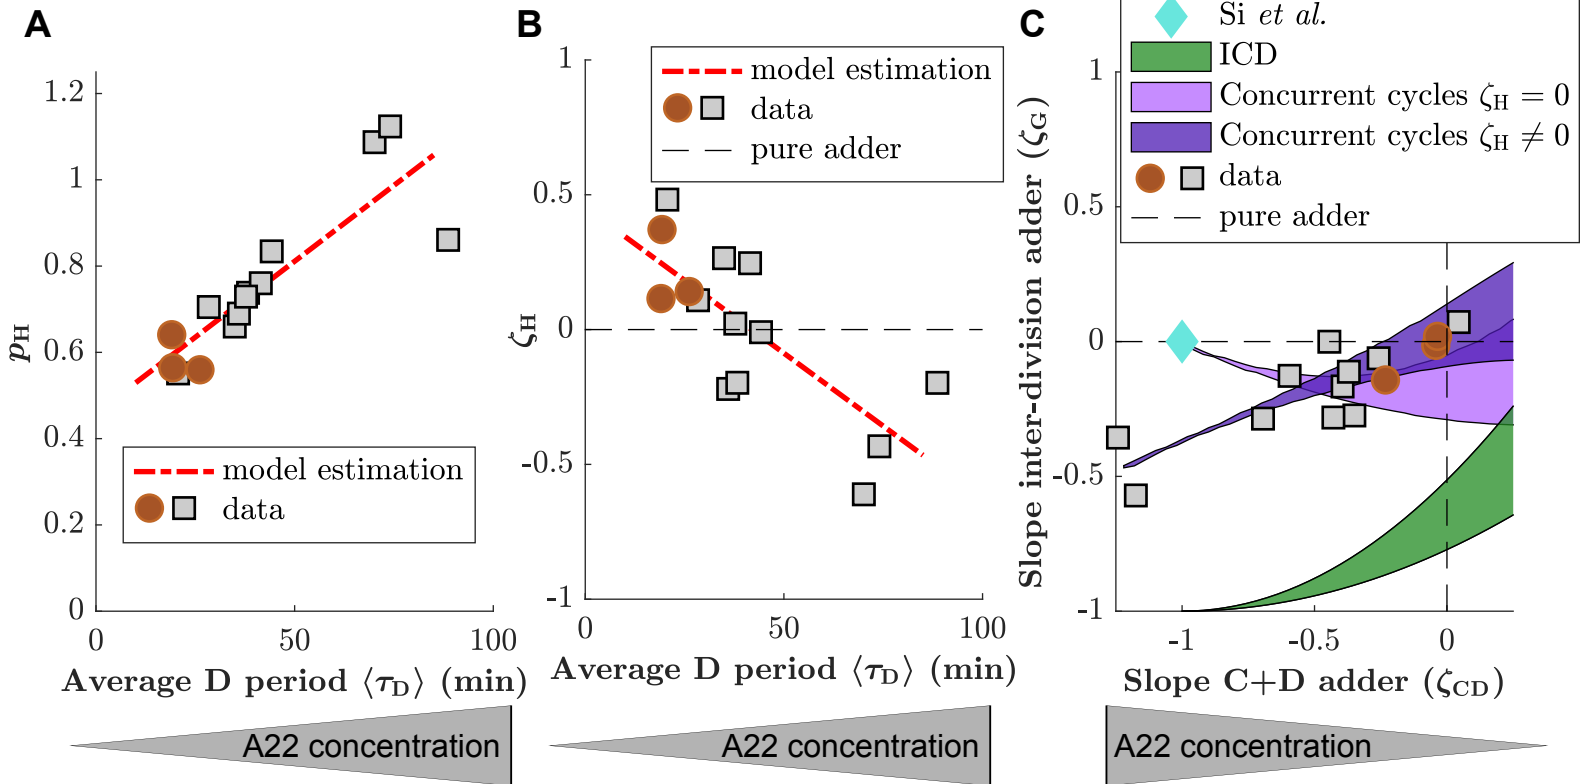

Supplement: supp [file elife-67495-supp-v1.zip]

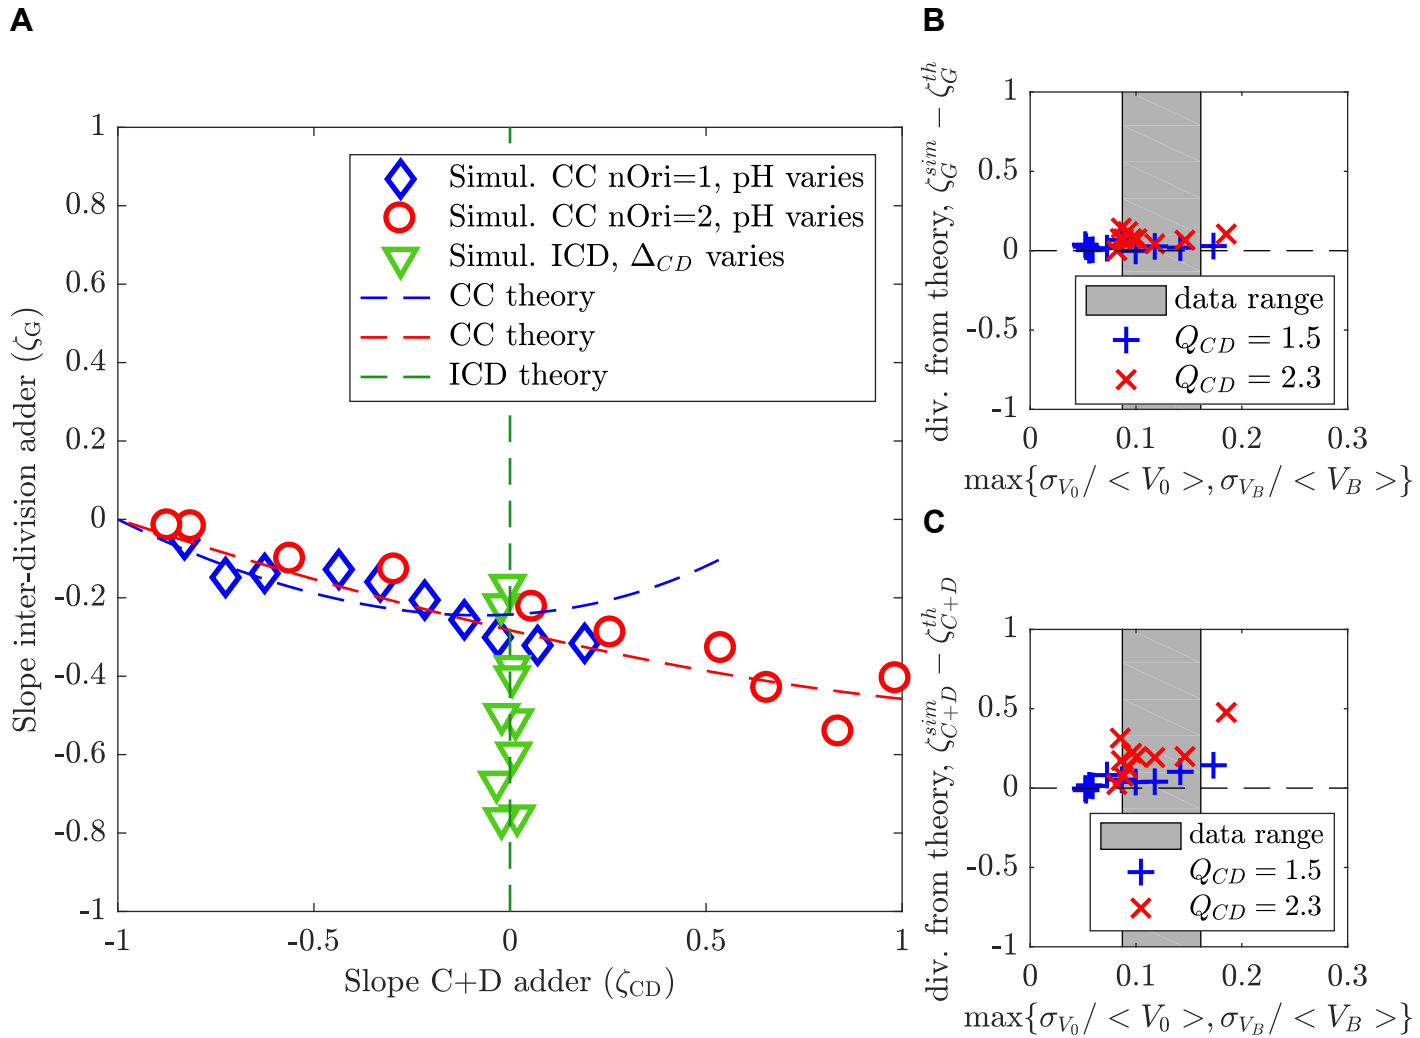

Supplement: supp [file elife-67495-supp-v1.zip]

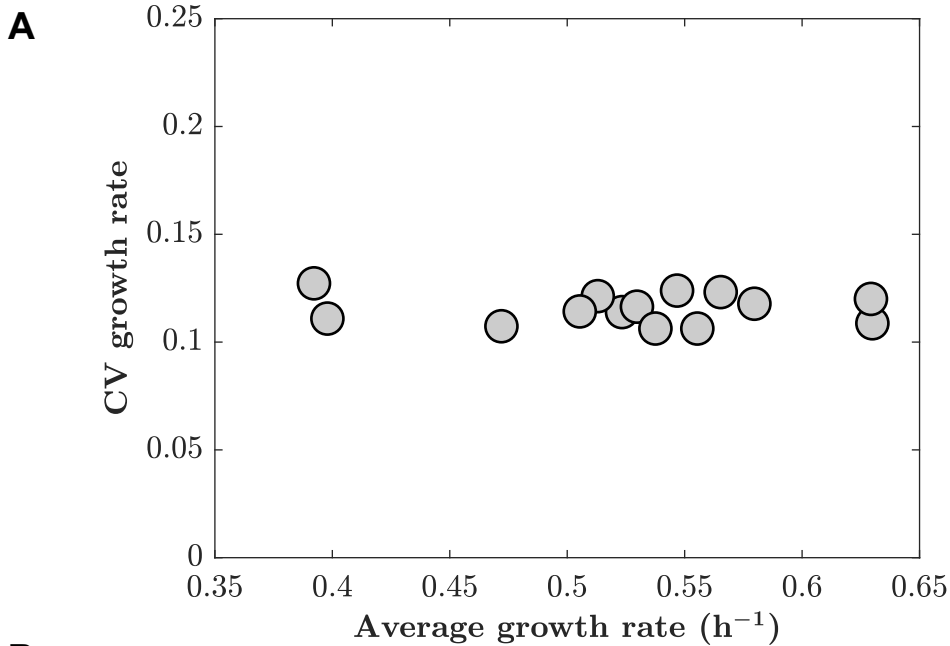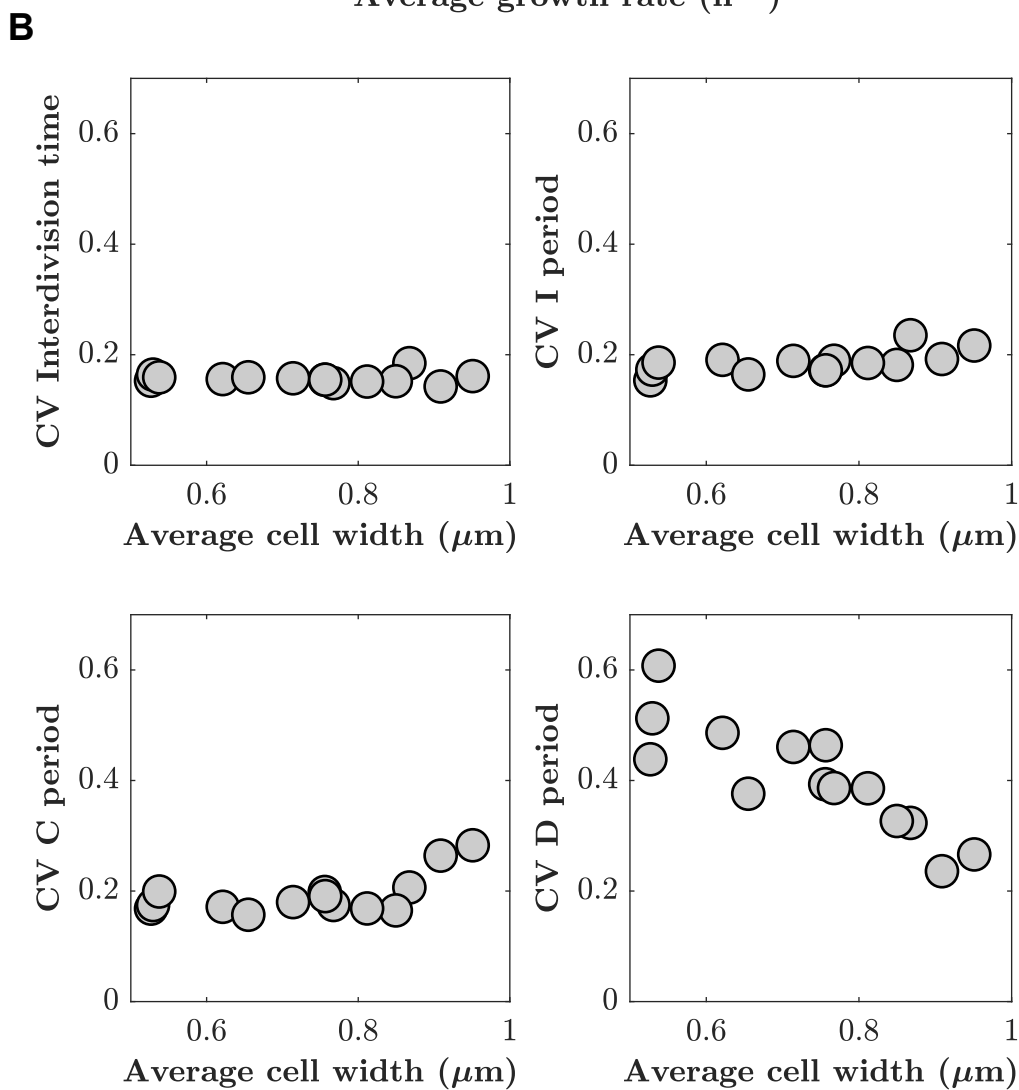

Supplement: supp [file elife-67495-supp-v1.zip]

[A22]

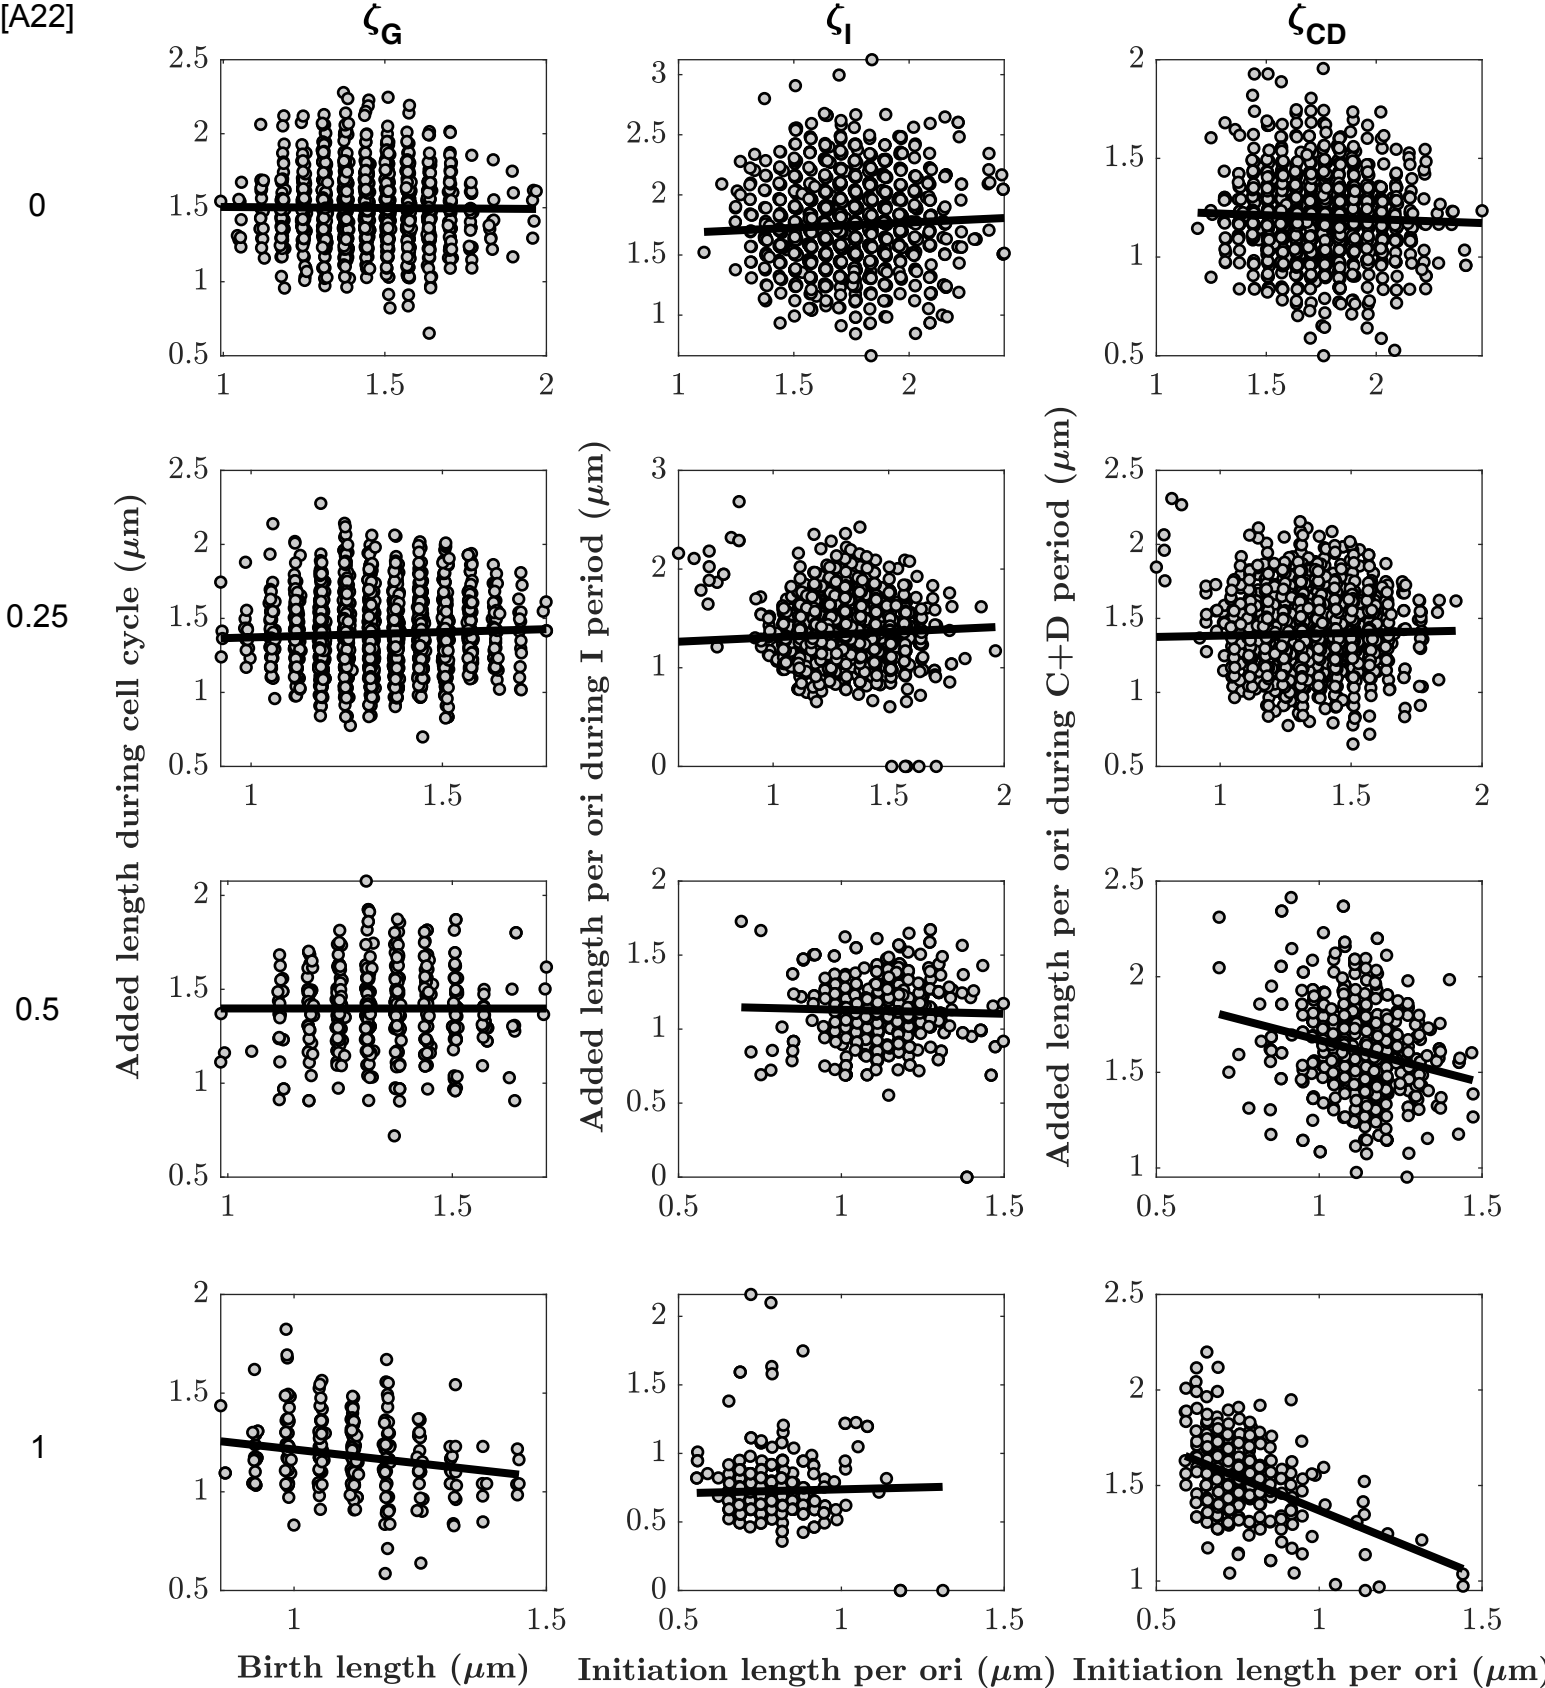

Supplement: supp [file elife-67495-supp-v1.zip]

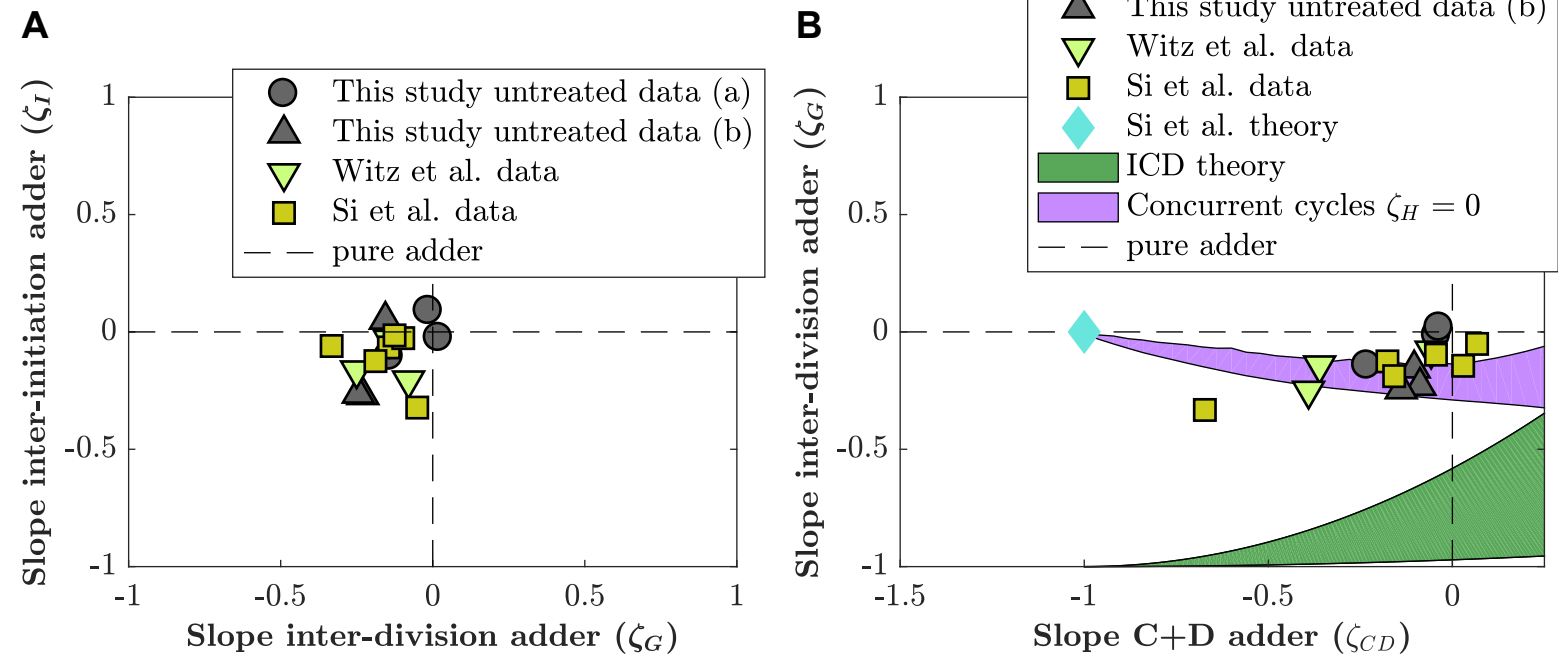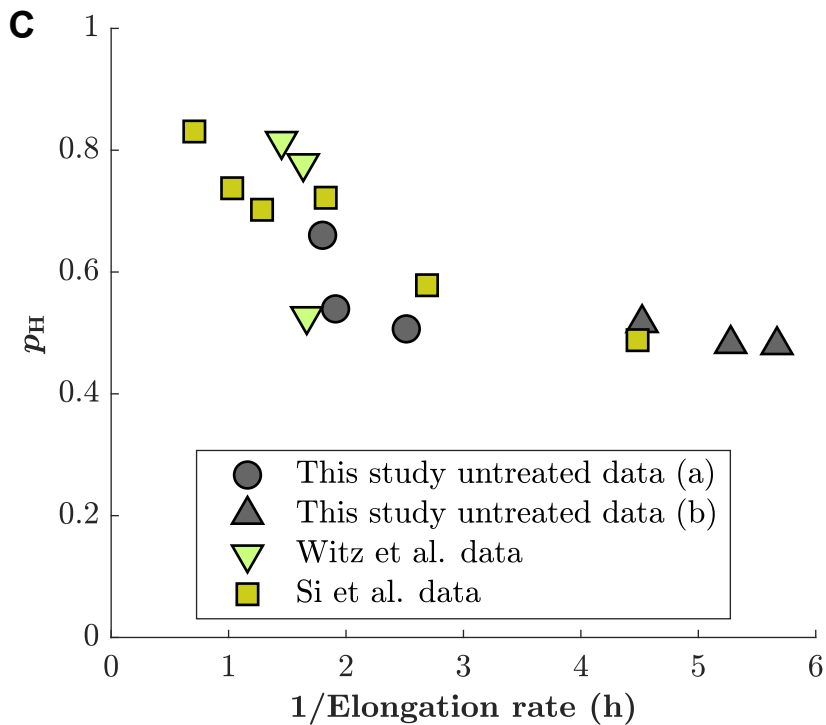

Supplement: supp [file elife-67495-supp-v1.zip]

**A**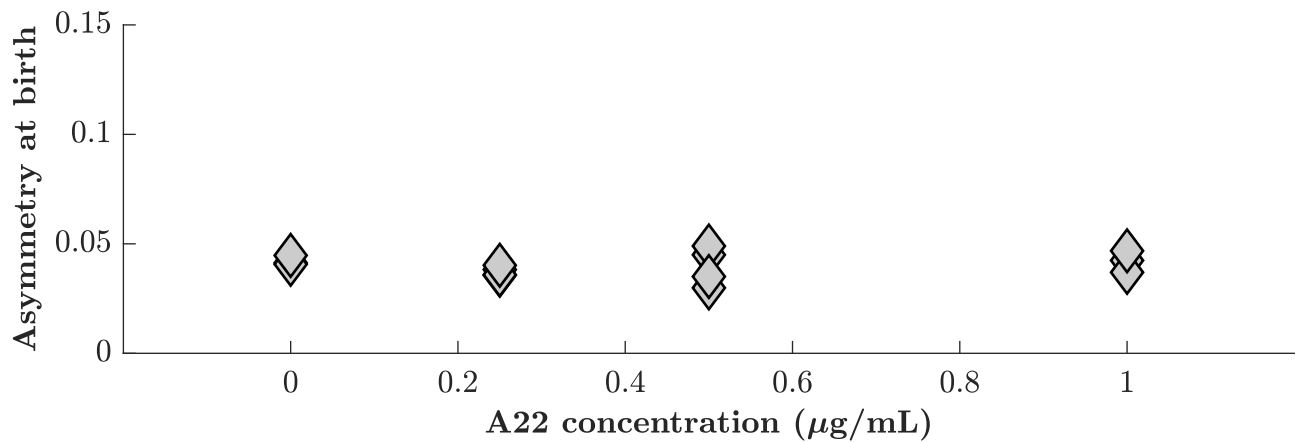**B**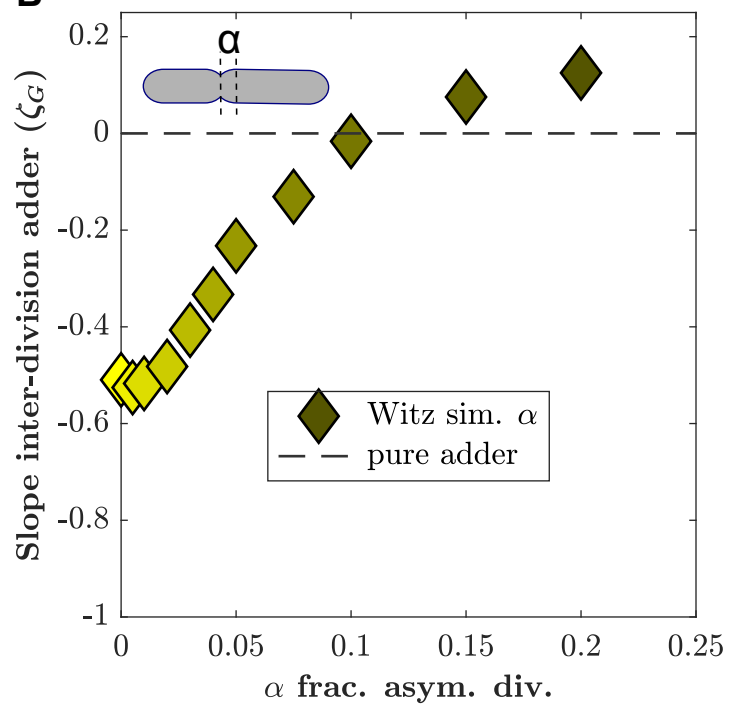**C**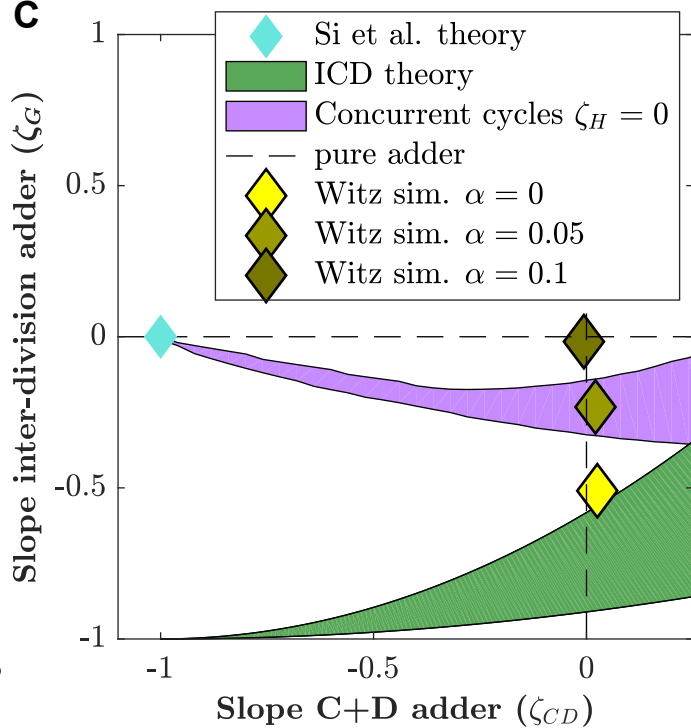

Supplement: supp [file elife-67495-supp-v1.zip]

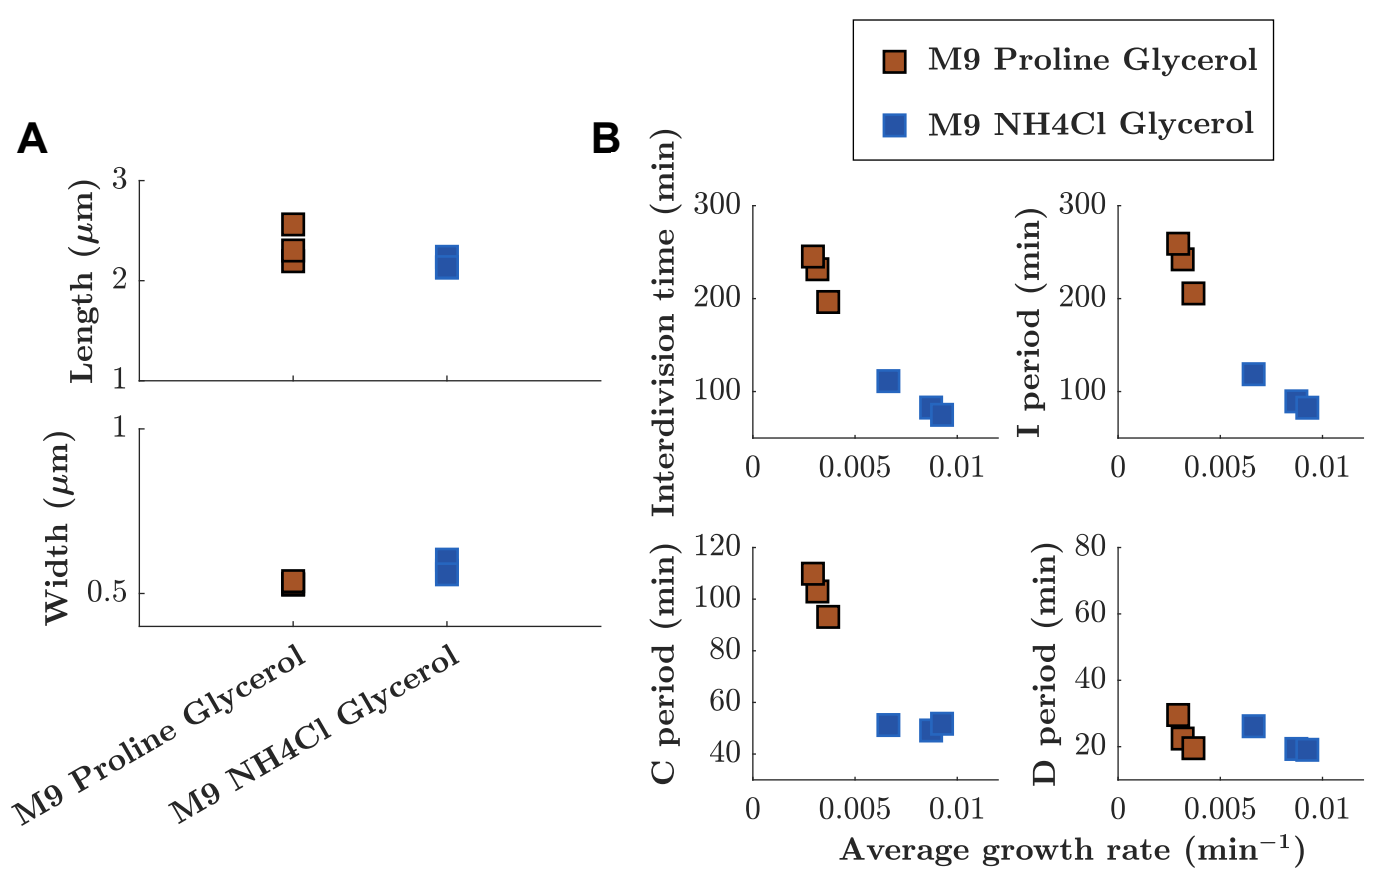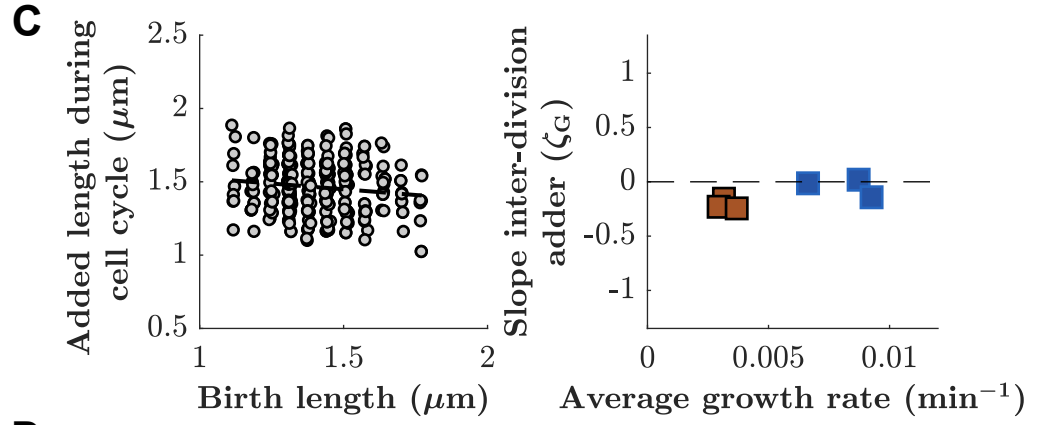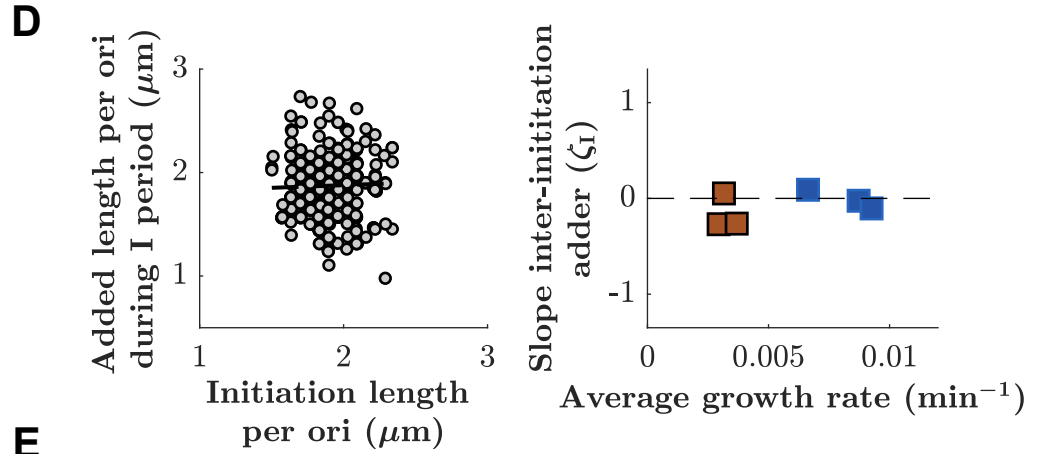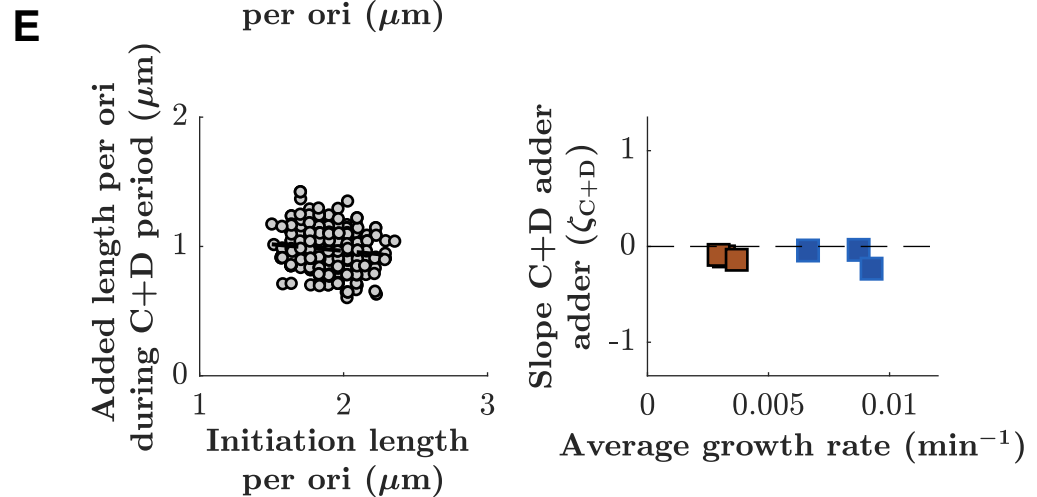

Supplement: supp [file elife-67495-supp-v1.zip]

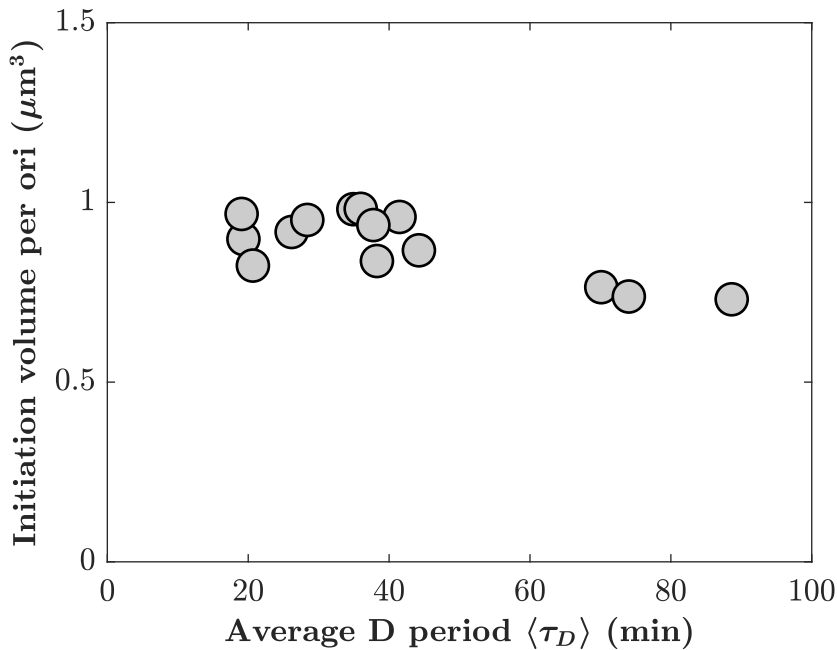

A22 concentration

Supplement: supp [file elife-67495-supp-v1.zip]

untreated

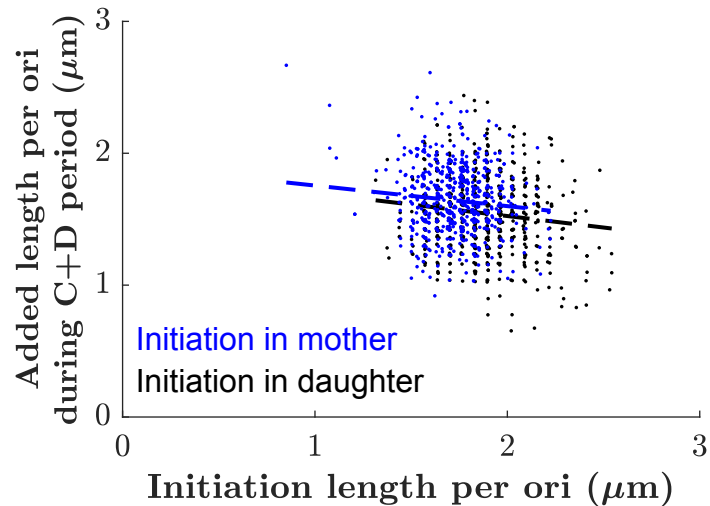

0.25  $\mu\text{g.mL}^{-1}$  A22

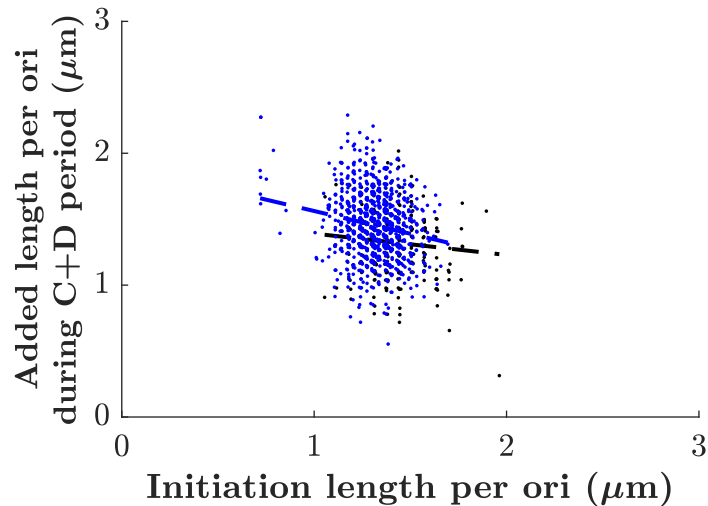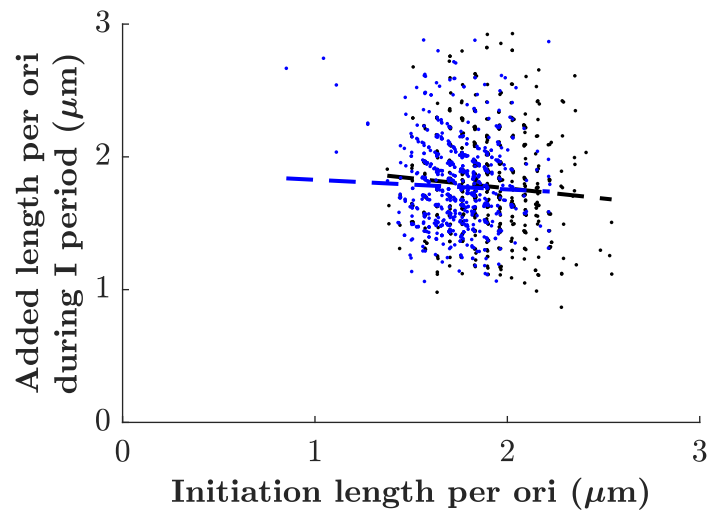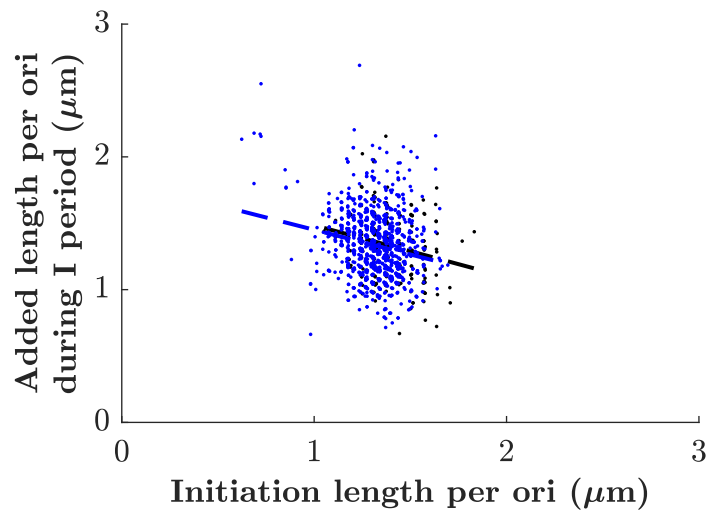

Supplement: supp [file elife-67495-supp-v1.zip]

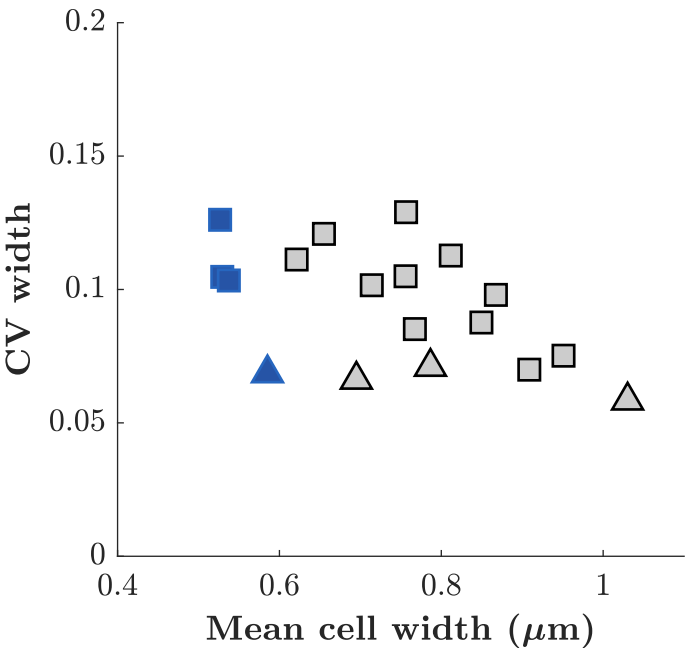

Supplement: supp [file elife-67495-supp-v1.zip]

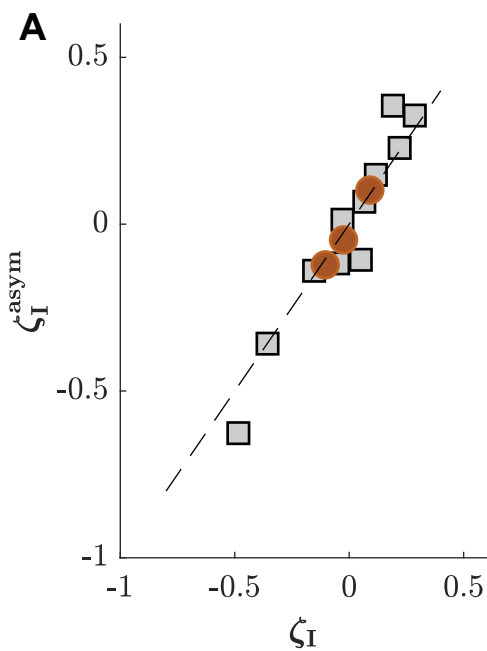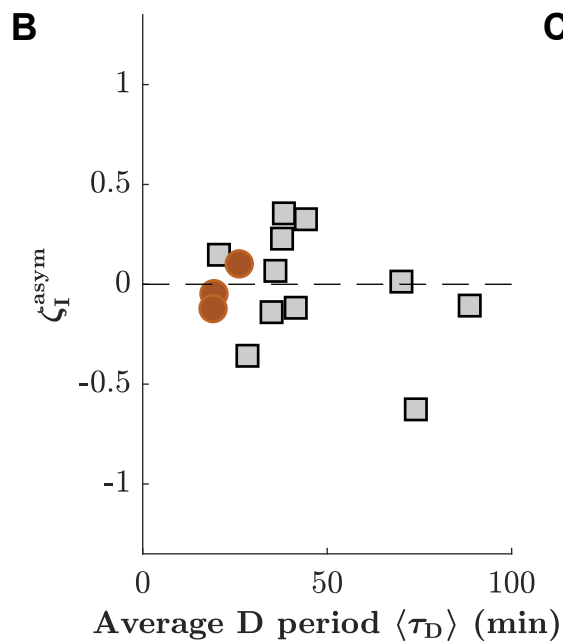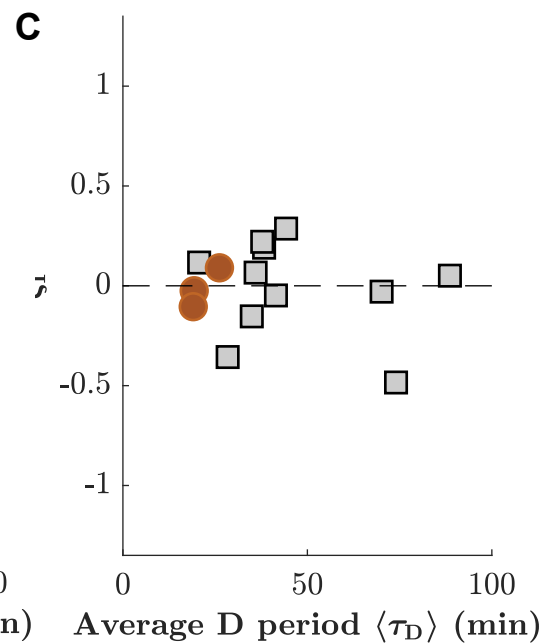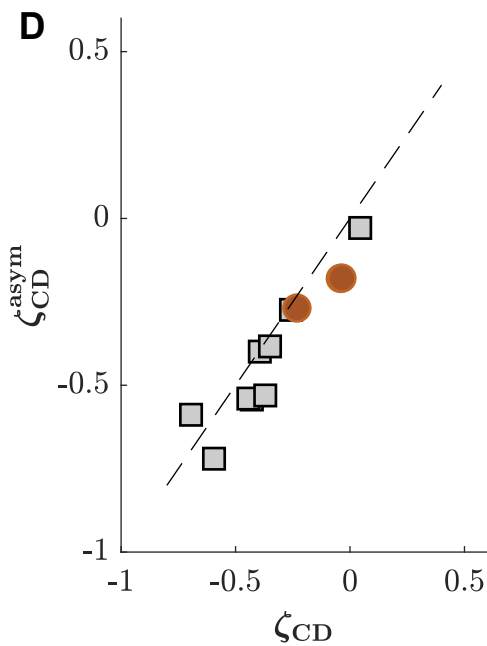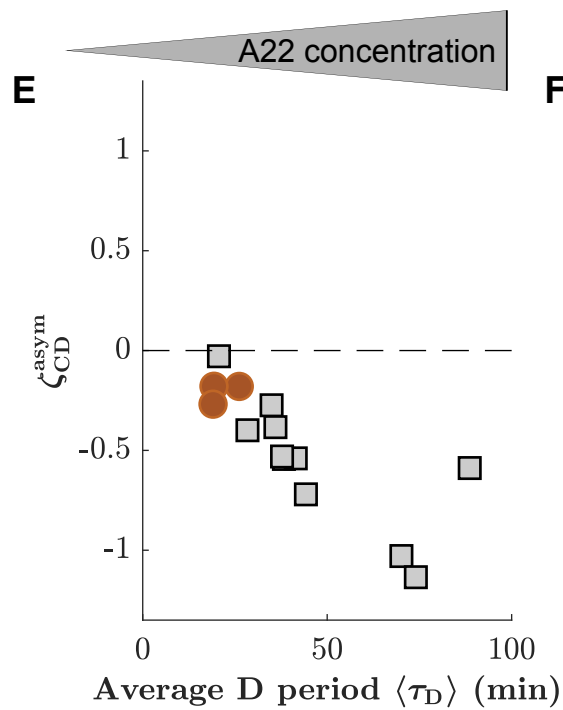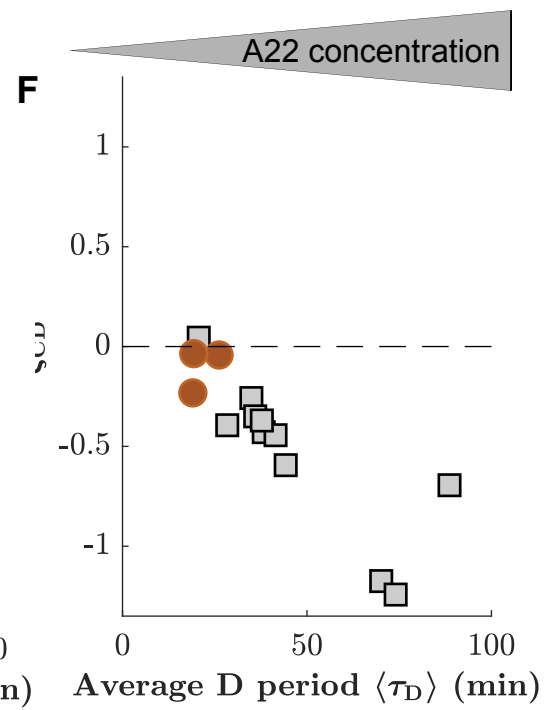

Supplement: supp [file elife-67495-supp-v1.zip]

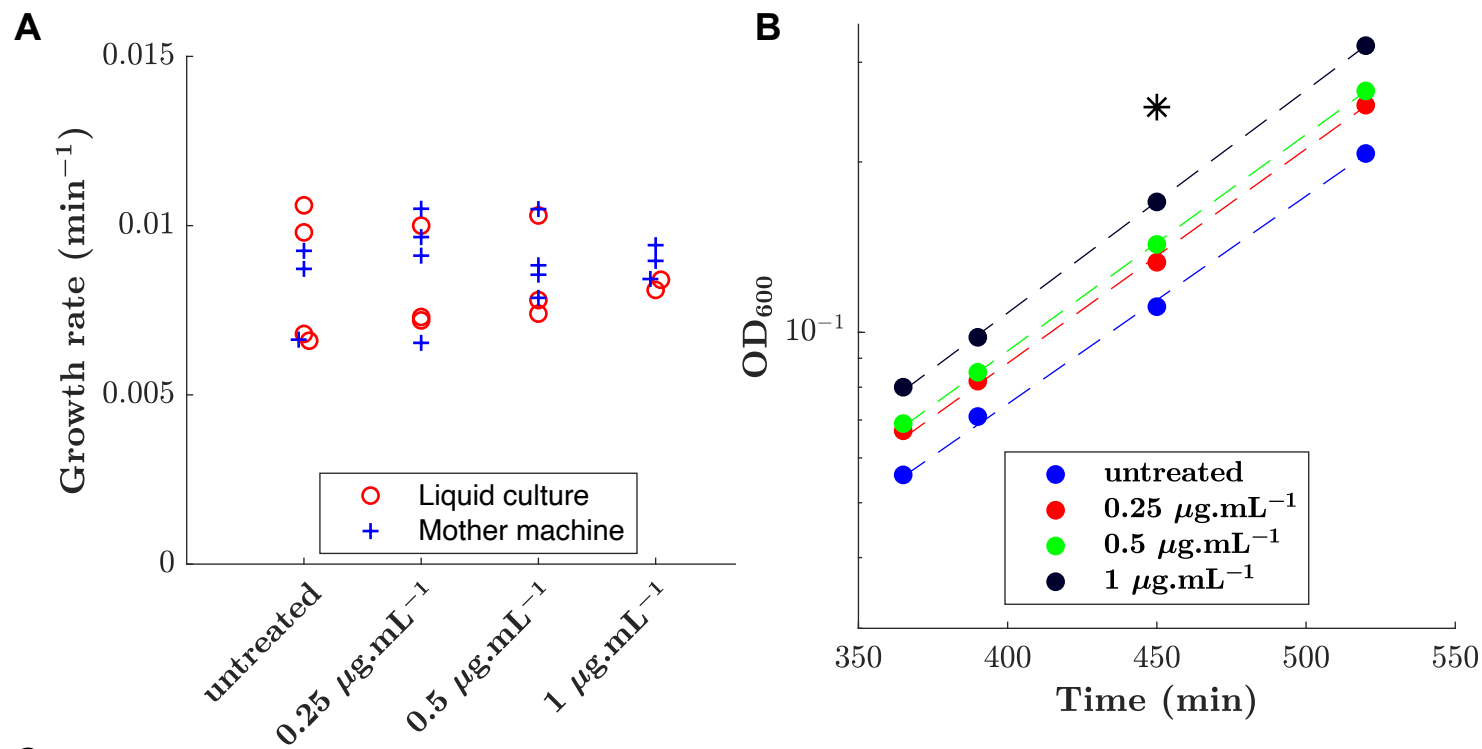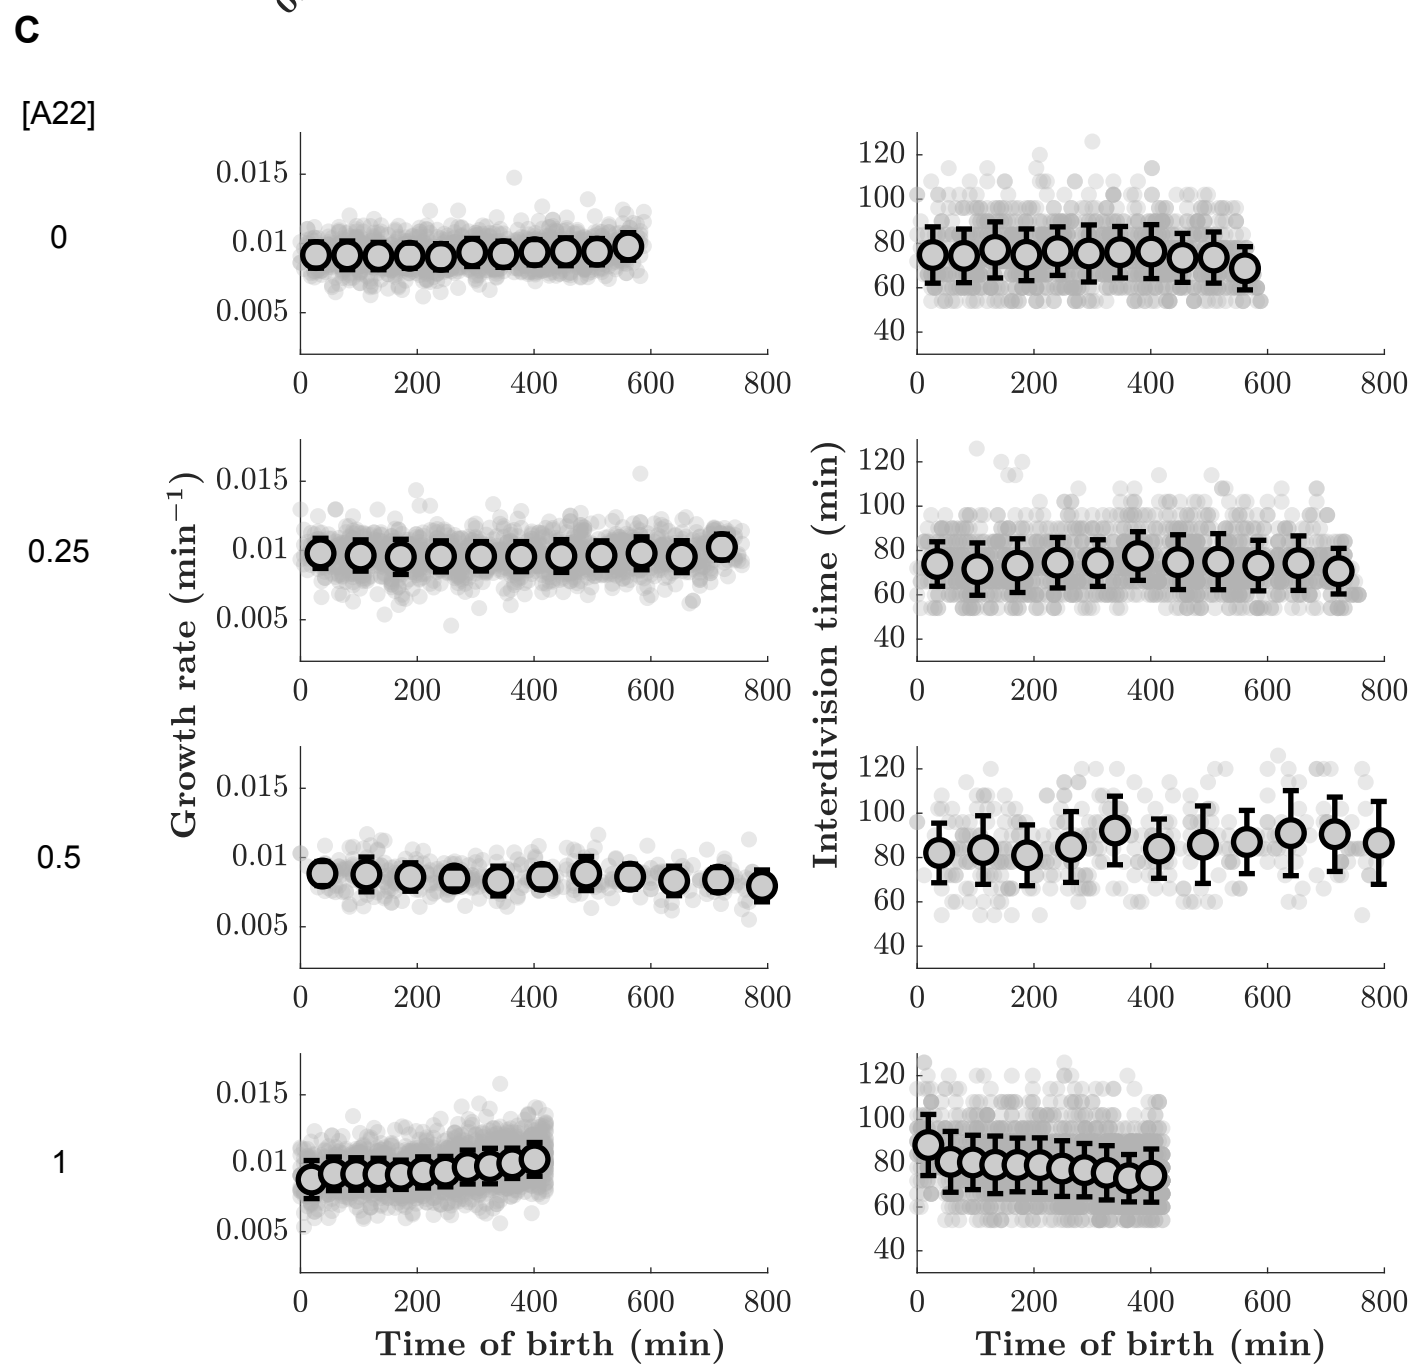

Supplement: supp [file elife-67495-supp-v1.zip]
